# Supplementary material for: Dynamic transitions in RNA polymerase II density profiles during transcription termination
Source: HighWire-hosted journal article supplement (doi:10.1101/gr.138057.112), 2012-06-08
Supplement: SupplementaryTable2.pdf [file SupplementaryTable2.pdf]

**Supplementary Table 2. Antibodies directed against RNAP II used to obtain the ChIP-seq data sets analysed.** These antibodies have been characterized and shown to recognize the different phosphorylated forms of RNAP II (Chapman et al. 2007; Ferrai et al. 2010). Although our analysis reveals similar overall results obtained with the different antibodies, some discrepancies observed between cell lines may be due to differences in antibody reactivity and specificity.

| <b>Organism<br/>(cell type)</b> | <b>Antibody (clone)</b>          | <b>Reference</b>      |
|---------------------------------|----------------------------------|-----------------------|
| Mouse embryonic<br>stem cells   | RNAP II total (N-20)             | Santa Cruz sc-899     |
|                                 | Ser5P                            | Abcam ab5131          |
|                                 | Ser2P (H5)                       | Abcam ab24758         |
| Human CD4+ T<br>cells           | RNAP II total (4H8)              | Abcam ab5408          |
|                                 | RNAP II unphosphorylated (8WG16) | Abcam ab817           |
|                                 | Ser5P                            | Abcam ab5131          |
| Mouse<br>CD4+/CD8+ T<br>cells   | RNAP II total (N-20)             | Santa Cruz sc-899     |
|                                 | Ser5P (3E8)                      | Chapman RD et al 2007 |
|                                 | Ser2P (3E10)                     | Chapman RD et al 2007 |
| Human MCF7                      | RNAP II total (N-20)             | Santa Cruz sc-899     |

## REFERENCES

- Chapman R, Heidemann M, Albert T, Mailhammer R, Flatley A, Meisterernst M, Kremmer E, Eick D. 2007. Transcribing RNA polymerase II is phosphorylated at CTD residue serine-7. *Science* **318**: 1780-1782.
- Ferrai C, Xie SQ, Luraghi P, Munari D, Ramirez F, Branco MR, Pombo A, Crippa MP. 2010. Poised transcription factories prime silent uPA gene prior to activation. *PLoS Biol* **8**(1): e1000270.
