# Supplementary material for: Dynamic transitions in RNA polymerase II density profiles during transcription termination
Source: HighWire-hosted journal article supplement (doi:10.1101/gr.138057.112), 2012-06-08
Supplement: SupplementaryTable3.xlsx [file SupplementaryTable3.xlsx]

## Sheet: MouseES
Peak Group	GeneSymbol	transcriptId	chrom	lxStart	lxEnd
RNAP II total no Ser5P	Pitx2	uc008rhu.1	chr3	128902835	128922508
RNAP II total no Ser5P	Mnt	uc007kcj.1	chr11	74644427	74659212
RNAP II total no Ser5P	AK122525	uc007ezj.1	chr10	43198945	43235214
RNAP II total no Ser5P	Ndufs3	uc008ktr.1	chr2	90734792	90744878
RNAP II total no Ser5P	Upf3b	uc009sye.1	chrX	34631828	34650317
RNAP II total no Ser5P	Ndufs6	uc007rdg.1	chr13	73457323	73465900
RNAP II total no Ser5P	Ltbp4	uc009fvu.1	chr7	28091016	28118667
RNAP II total no Ser5P	Reep4	uc007uoi.1	chr14	70945429	70948739
RNAP II total no Ser5P	Cdca7	uc008kbx.1	chr2	72314275	72324947
RNAP II total no Ser5P	Bub3	uc009kbq.1	chr7	138703904	138715412
RNAP II total no Ser5P	Sf1	uc008gim.1	chr19	6364087	6377196
RNAP II total no Ser5P	Pabpc4	uc008upa.1	chr4	122939620	122976076
RNAP II total no Ser5P	6720458F09Rik	uc007pdo.1	chr12	112916315	112922113
RNAP II total no Ser5P	Morf4l2	uc009uiu.1	chrX	133267489	133275817
RNAP II total no Ser5P	Immt	uc009chi.1	chr6	71781324	71825260
RNAP II total no Ser5P	Slc35e3	uc007hdn.1	chr10	117170733	117183414
RNAP II total no Ser5P	Sfpq	uc008utz.1	chr4	126698578	126708040
RNAP II total no Ser5P	Sf3b3	uc009nlb.1	chr8	113334391	113370703
RNAP II total no Ser5P	1110012J17Rik	uc008djv.1	chr17	66686328	66799090
RNAP II total no Ser5P	Zmat3	uc008owc.1	chr3	32233715	32264587
RNAP II total no Ser5P	Myh9	uc007woc.1	chr15	77591018	77672545
RNAP II total no Ser5P	Sgta	uc007gft.1	chr10	80506817	80522899
RNAP II total no Ser5P	Pkm2	uc009pyh.1	chr9	59504414	59522881
RNAP II total no Ser5P	Elavl1	uc009kts.1	chr8	4284781	4325100
RNAP II total no Ser5P	Lrfn1	uc009fzc.1	chr7	29243645	29252502
RNAP II total no Ser5P	Fbxo15	uc008fux.1	chr18	85104416	85150784
RNAP II total no Ser5P	1700054N08Rik	uc009nwq.1	chr8	126364743	126384109
RNAP II total no Ser5P	Ctdsp1	uc007blz.1	chr1	74438172	74443859
RNAP II total no Ser5P	Mrps24	uc007hwt.1	chr11	5603985	5607702
RNAP II total no Ser5P	Psmd7	uc009nhz.1	chr8	110104280	110112382
RNAP II total no Ser5P	Bcas2	uc008qsu.1	chr3	102975633	102983077
RNAP II total no Ser5P	AK146146	uc009aqb.1	chr5	150444184	150450365
RNAP II total no Ser5P	Tmem125	uc008ukk.1	chr4	118213546	118216333
RNAP II total no Ser5P	Rara	uc007lhy.1	chr11	98799009	98836256
RNAP II total no Ser5P	Dppa4	uc007zjl.1	chr16	48283847	48294405
RNAP II total no Ser5P	Tceal8	uc009uie.1	chrX	132704619	132706744
RNAP II total no Ser5P	Orc5l	uc008wpq.1	chr5	21992306	22056149
RNAP II total no Ser5P	Morf4l1	uc009qzw.1	chr9	89986506	90009600
RNAP II total no Ser5P	Gcsh	uc009not.1	chr8	119505727	119517349
RNAP II total no Ser5P	Snrpa	uc009fvh.1	chr7	27972024	27981078
RNAP II total no Ser5P	Clk1	uc007bbs.1	chr1	58468843	58480932
RNAP II total no Ser5P	Hnrph2	uc009ugh.1	chrX	131135824	131141593
RNAP II total no Ser5P	Ssrp1	uc008kju.1	chr2	84877357	84887268
RNAP II total no Ser5P	Tex19	uc007mvi.1	chr11	121007456	121009627
RNAP II total no Ser5P	Eif3b	uc009ahr.1	chr5	140895258	140919312
RNAP II total no Ser5P	Mto1	uc009qum.1	chr9	78296026	78321946
RNAP II total no Ser5P	Pcbp1	uc009csc.1	chr6	86474490	86476159
RNAP II total no Ser5P	Snx5	uc008mqr.1	chr2	144075861	144096573
RNAP II total no Ser5P	2700097O09Rik	uc007noe.1	chr12	56154740	56181097
RNAP II total no Ser5P	Luc7l	uc008beb.1	chr17	26389854	26422449
RNAP II total no Ser5P	Rpusd1	uc008bbl.1	chr17	25864695	25868401
RNAP II total no Ser5P	AK017500	uc009srf.1	chrX	12619140	12622421
RNAP II total no Ser5P	Rbm5	uc009rmx.1	chr9	107642832	107673307
RNAP II total no Ser5P	Rraga	uc008tlw.1	chr4	86221589	86223187
RNAP II total no Ser5P	Sars	uc008qza.1	chr3	108229529	108248087
RNAP II total no Ser5P	Ptprf	uc008ujq.1	chr4	117880817	117964002
RNAP II total no Ser5P	Per1	uc007jpg.1	chr11	68912450	68923459
RNAP II total no Ser5P	Crk	uc007ker.1	chr11	75492811	75519594
RNAP II total no Ser5P	Sf3a1	uc007hup.1	chr11	4060370	4080632
RNAP II total no Ser5P	Dppa2	uc007zjn.1	chr16	48310386	48319626
RNAP II total no Ser5P	2810422J05Rik	uc009man.1	chr8	73037294	73047078
RNAP II total no Ser5P	Jup	uc007lkz.1	chr11	100231932	100259053
RNAP II total no Ser5P	Mbd3	uc007gda.1	chr10	79855285	79862111
RNAP II total no Ser5P	6720456B07Rik	uc009dgz.1	chr6	113554765	113566945
RNAP II total no Ser5P	Psmg3	uc009ahg.1	chr5	140299547	140302797
RNAP II total no Ser5P	Gtrgeo22	uc007fzh.1	chr10	79132154	79138871
RNAP II total no Ser5P	Tmem123	uc009ocy.1	chr9	7764127	7794332
RNAP II total no Ser5P	Sall4	uc008obf.1	chr2	168573831	168592701
RNAP II total no Ser5P	Set	uc008jaw.1	chr2	29917562	29927314
RNAP II total no Ser5P	Triobp	uc007wry.1	chr15	78778153	78836299
RNAP II total no Ser5P	AK019388	uc007qtf.1	chr13	58227240	58228749
RNAP II total no Ser5P	Klf3	uc008xmr.1	chr5	65194761	65216045
RNAP II total no Ser5P	Akr1a4	uc008uha.1	chr4	116309114	116324256
RNAP II total no Ser5P	Acp6	uc008qoq.1	chr3	96962713	96980491
RNAP II total no Ser5P	Cbfa2t2	uc008njf.1	chr2	154262253	154365092
RNAP II total no Ser5P	Ccdc115	uc007aoq.1	chr1	34493520	34496517
RNAP II total no Ser5P	Imp4	uc007aor.1	chr1	34496744	34502592
RNAP II total no Ser5P	Mis12	uc007jxn.1	chr11	70833112	70840636
RNAP II total no Ser5P	Pigl	uc007jje.1	chr11	62271961	62327402
RNAP II total no Ser5P	Cdr2l	uc007mhi.1	chr11	115243229	115257446
RNAP II total no Ser5P	Ubox5	uc008mjj.1	chr2	130415737	130455722
RNAP II total no Ser5P	Sparc	uc007izh.1	chr11	55208002	55233367
RNAP II total no Ser5P	Ski	uc008wcz.1	chr4	154528183	154596644
RNAP II total no Ser5P	AK015665	uc008ljw.1	chr2	104399340	104411586
RNAP II total no Ser5P	Fem1b	uc009qam.1	chr9	62639627	62659409
RNAP II total no Ser5P	Them2	uc007pwj.1	chr13	24909823	24923358
RNAP II total no Ser5P	Ube1x	uc009stl.1	chrX	20235546	20260305
RNAP II total no Ser5P	Kiaa0240	uc008cul.1	chr17	46935230	46969263
RNAP II total no Ser5P	Clk4	uc007itr.1	chr11	51076672	51095266
RNAP II total no Ser5P	Polr2e	uc007gbi.1	chr10	79498697	79502404
RNAP II total no Ser5P	Mcm2	uc009cvx.1	chr6	88833468	88848691
RNAP II total no Ser5P	Spp1	uc008yki.1	chr5	104864139	104870062
RNAP II total no Ser5P	B3galt6	uc008wfq.1	chr4	155363574	155366787
RNAP II total no Ser5P	Prkci	uc008ovs.1	chr3	30894692	30951662
RNAP II total no Ser5P	Ddx27	uc008nza.1	chr2	166840812	166851307
RNAP II total no Ser5P	Atp5j	uc007zti.1	chr16	84828115	84835819
RNAP II total no Ser5P	Pabpc1	uc007vmx.1	chr15	36525417	36538717
RNAP II total no Ser5P	Aire	uc007fxc.1	chr10	77492775	77506325
RNAP II total no Ser5P	Nob1	uc009nhs.1	chr8	109941594	109948938
RNAP II total no Ser5P	Mrpl37	uc008tza.1	chr4	106728486	106739450
RNAP II total no Ser5P	Ythdf1	uc008okd.1	chr2	180639081	180655641
RNAP II total no Ser5P	Numbl	uc009fvq.1	chr7	28043779	28067169
RNAP II total no Ser5P	Thoc3	uc007qod.1	chr13	54560878	54570180
RNAP II total no Ser5P	Tmsb4x	uc009uwx.1	chrX	163645025	163647150
RNAP II total no Ser5P	Basp1	uc007vix.1	chr15	25293244	25343489
RNAP II total no Ser5P	Sfrs10	uc007ysd.1	chr16	22245813	22266002
RNAP II total no Ser5P	Odc1	uc007ncv.1	chr12	17551678	17558308
RNAP II total no Ser5P	1810029B16Rik	uc009lvo.1	chr8	69000244	69010406
RNAP II total no Ser5P	Akp2	uc008vjr.1	chr4	137297653	137352238
RNAP II total no Ser5P	Setd1b	uc008znf.1	chr5	123592201	123599990
RNAP II total no Ser5P	Gtf2h1	uc009gzl.1	chr7	54052040	54079167
RNAP II total no Ser5P	Epha2	uc008voc.1	chr4	140857154	140885293
RNAP II total no Ser5P	Mlf2	uc009dsq.1	chr6	124881493	124887256
RNAP II total no Ser5P	9430015G10Rik	uc008wgd.1	chr4	155484097	155501372
RNAP II total no Ser5P	Ankrd35	uc008qns.1	chr3	96474053	96494957
RNAP II total no Ser5P	Zswim4	uc009mmg.1	chr8	86734840	86760941
RNAP II total no Ser5P	Ung	uc008yzf.1	chr5	114580443	114589330
RNAP II total no Ser5P	Prpf38b	uc008qzx.1	chr3	108705724	108714622
RNAP II total no Ser5P	Atg16l1	uc007bxm.1	chr1	89652645	89688997
RNAP II total no Ser5P	Cdc37l1	uc008hcs.1	chr19	29064983	29083157
RNAP II total no Ser5P	Umps	uc007zap.1	chr16	33955097	33967089
RNAP II total no Ser5P	Dlc1	uc009llq.1	chr8	37630798	37676928
RNAP II total no Ser5P	Fiz1	uc009eze.1	chr7	4958660	4964840
RNAP II total no Ser5P	Vps18	uc008lto.1	chr2	119114492	119124189
RNAP II total no Ser5P	Rpl6	uc008ziq.2	chr5	121654539	121659249
RNAP II total no Ser5P	Nfyc	uc008unn.1	chr4	120430039	120498320
RNAP II total no Ser5P	Slc25a3	uc007gtn.1	chr10	90579322	90586708
RNAP II total no Ser5P	Rpp14	uc007seq.1	chr14	8912880	8924348
RNAP II total no Ser5P	Xylt2	uc007kzi.1	chr11	94525164	94538774
RNAP II total no Ser5P	Mapt	uc007lwe.1	chr11	104092749	104156631
RNAP II total no Ser5P	Samm50	uc007xbx.1	chr15	84022662	84044733
RNAP II total no Ser5P	Rnf38	uc008srs.1	chr4	44139084	44181211
RNAP II total no Ser5P	Klf5	uc007uvg.1	chr14	99697909	99712628
RNAP II total no Ser5P	Fzd7	uc007bdu.1	chr1	59539022	59543799
RNAP II total no Ser5P	Actr1b	uc007aqx.1	chr1	36756046	36766770
RNAP II total no Ser5P	Spry4	uc008esl.1	chr18	38745918	38760922
RNAP II total no Ser5P	Mrp63	uc007udq.1	chr14	58445075	58447582
RNAP II total no Ser5P	Med1	uc007lfq.1	chr11	98014974	98054607
RNAP II total no Ser5P	Slc7a5	uc009nsc.1	chr8	124405049	124431572
RNAP II total no Ser5P	Ptch2	uc008uhx.1	chr4	116768960	116787436
RNAP II total no Ser5P	Psmf1	uc008nek.1	chr2	151541797	151567029
RNAP II total no Ser5P	Etv5	uc007yse.1	chr16	22381385	22439643
RNAP II total no Ser5P	C330016O10Rik	uc007iue.1	chr11	51456590	51464575
RNAP II total no Ser5P	Mapk6	uc009qsd.1	chr9	75234707	75257166
RNAP II total no Ser5P	Rai1	uc007jfl.1	chr11	59953583	60005527
RNAP II total no Ser5P	Hspbap1	uc007zbq.1	chr16	35770471	35828548
RNAP II total no Ser5P	Cbx5	uc007xxm.1	chr15	103021976	103045783
RNAP II total no Ser5P	Giyd2	uc009jsh.1	chr7	133834649	133839297
RNAP II total no Ser5P	Gnai2	uc009rml.1	chr9	107516468	107537673
RNAP II total no Ser5P	Ccnd1	uc009kqt.1	chr7	152115835	152125830
RNAP II total no Ser5P	Klf16	uc007gdt.1	chr10	80029865	80040041
RNAP II total no Ser5P	Klf10	uc007vnr.1	chr15	38224167	38230462
RNAP II total no Ser5P	Fkbp4	uc009edr.1	chr6	128380124	128388649
RNAP II total no Ser5P	Ina	uc008huk.1	chr19	47089187	47098836
RNAP II total no Ser5P	Grpel1	uc008xep.1	chr5	36807833	36816726
RNAP II total no Ser5P	Jrk	uc007wfp.1	chr15	74534992	74539752
RNAP II total no Ser5P	Trim11	uc007jda.1	chr11	58791617	58804960
RNAP II total no Ser5P	Glo1	uc008btx.1	chr17	30729806	30749536
RNAP II total no Ser5P	Rg9mtd1	uc007zmd.1	chr16	56033832	56037887
RNAP II total no Ser5P	Tuba1c	uc007xom.1	chr15	98860321	98868536
RNAP II total no Ser5P	Isg20l1	uc009hxp.1	chr7	86040812	86053719
RNAP II total no Ser5P	Eif4h	uc008zwp.1	chr5	135095745	135115198
RNAP II total no Ser5P	2410014A08Rik	uc008zdf.1	chr5	115595101	115608155
RNAP II total no Ser5P	AK015392	uc008nwo.1	chr2	164703586	164705276
RNAP II total no Ser5P	Slc25a28	uc008hon.1	chr19	43738291	43749371
RNAP II total no Ser5P	3000004C01Rik	uc007lsy.1	chr11	102766842	102786406
RNAP II total no Ser5P	Dnajc11	uc008vys.1	chr4	151307842	151350793
RNAP II total no Ser5P	2610204M08Rik	uc007pes.1	chr12	113826994	113853768
RNAP II total no Ser5P	E130014J05Rik	uc008rkq.2	chr3	133126640	133207354
RNAP II total no Ser5P	Trpm4	uc009gup.1	chr7	52558001	52589112
RNAP II total no Ser5P	Pars2	uc008typ.1	chr4	106323673	106327887
RNAP II total no Ser5P	Pnn	uc007nqb.1	chr12	60167905	60175004
RNAP II total no Ser5P	Ldlr	uc009omi.1	chr9	21528037	21554362
RNAP II total no Ser5P	Ppp2r2d	uc009kfe.1	chr7	146038068	146074739
RNAP II total no Ser5P	Rsrc2	uc008zoj.1	chr5	124178438	124199421
RNAP II total no Ser5P	Rbpms	uc009lkk.1	chr8	34893115	35040313
RNAP II total no Ser5P	Nol11	uc007mah.1	chr11	107027659	107050574
RNAP II total no Ser5P	Iars	uc007qjv.1	chr13	49777512	49829626
RNAP II total no Ser5P	Park7	uc008vxz.1	chr4	150271250	150283959
RNAP II total no Ser5P	Itpk1	uc007ouj.1	chr12	103806792	103943079
RNAP II total no Ser5P	Jarid1b	uc007csh.1	chr1	136456771	136529454
RNAP II total no Ser5P	Slc1a4	uc007idb.1	chr11	20202207	20232674
RNAP II total no Ser5P	Fn1	uc007bju.1	chr1	71632096	71699745
RNAP II total no Ser5P	Smad7	uc008fqd.1	chr18	75527018	75555588
RNAP II total no Ser5P	Cep78	uc008gwr.1	chr19	16030262	16059479
RNAP II total no Ser5P	Eif4e2	uc007bwk.1	chr1	89110488	89125433
RNAP II total no Ser5P	Sumo2	uc007mhw.1	chr11	115384422	115397544
RNAP II total no Ser5P	Ankrd25	uc009omm.1	chr9	21572522	21602961
RNAP II total no Ser5P	Nomo1	uc009gyb.1	chr7	53289189	53339574
RNAP II total no Ser5P	Rbpms2	uc009qds.1	chr9	65477454	65508325
RNAP II total no Ser5P	Twf1	uc007xjl.1	chr15	94408378	94420255
RNAP II total no Ser5P	Myst2	uc007lae.1	chr11	95135572	95171515
RNAP II total no Ser5P	Wdr5	uc008ixd.1	chr2	27013770	27392055
RNAP II total no Ser5P	Ift52	uc008nsi.1	chr2	162843207	162859283
RNAP II total no Ser5P	BC066107	uc008bxp.1	chr17	33016165	33028472
RNAP II total no Ser5P	Gatad2a	uc009lyf.1	chr8	72432368	72498170
RNAP II total no Ser5P	Gdf11	uc007hot.1	chr10	128321601	128328774
RNAP II total no Ser5P	Pkp4	uc008jtc.1	chr2	58998906	59193262
RNAP II total no Ser5P	Topors	uc008shi.1	chr4	40206638	40216874
RNAP II total no Ser5P	Rps27	uc008qbl.1	chr3	90016592	90017569
RNAP II total no Ser5P	Rbm45	uc008kez.1	chr2	76208040	76221824
RNAP II total no Ser5P	Adipor1	uc007crx.1	chr1	136312043	136328918
RNAP II total no Ser5P	Bcdin3d	uc007xpo.1	chr15	99300514	99305160
RNAP II total no Ser5P	Alg11	uc009lcl.1	chr8	23171191	23178761
RNAP II total no Ser5P	Pa2g4	uc007hnl.1	chr10	127994821	128002990
RNAP II total no Ser5P	Nodal	uc007ffy.1	chr10	60881047	60887384
RNAP II total no Ser5P	Cpsf4	uc009ami.1	chr5	145928092	145939744
RNAP II total no Ser5P	Cnnm2	uc008hue.1	chr19	46836098	46953070
RNAP II total no Ser5P	Txn1	uc008syp.1	chr4	57956244	57969283
RNAP II total no Ser5P	2810432D09Rik	uc008sjh.1	chr4	41659066	41660535
RNAP II total no Ser5P	Prpf6	uc008omz.1	chr2	181336023	181390366
RNAP II total no Ser5P	Gtpbp5	uc008oid.1	chr2	179805297	179820607
RNAP II total no Ser5P	Nfe2l2	uc008keq.1	chr2	75513575	75542698
RNAP II total no Ser5P	Sfrs1	uc007kvc.1	chr11	87861172	87867259
RNAP II total no Ser5P	Slc35f2	uc009pmn.1	chr9	53619344	53665963
RNAP II total no Ser5P	Gfer	uc008axr.1	chr17	24830135	24833101
RNAP II total no Ser5P	Tera	uc009etq.1	chr6	148869580	148893156
RNAP II total no Ser5P	Hs6st1	uc007apn.1	chr1	36125253	36163291
RNAP II total no Ser5P	Trip10	uc008dek.1	chr17	57388873	57402846
RNAP II total no Ser5P	Hmmr	uc007ilt.1	chr11	40515257	40546924
RNAP II total no Ser5P	Ldha	uc009gzm.1	chr7	54101212	54110996
RNAP II total no Ser5P	Brpf3	uc008brp.1	chr17	28938070	28975734
RNAP II total no Ser5P	Tpm3	uc008qbf.1	chr3	89876615	89895013
RNAP II total no Ser5P	Zfp42	uc009lob.2	chr8	44380420	44392363
RNAP II total no Ser5P	Atp6v0e	uc008bei.1	chr17	26813340	26836591
RNAP II total no Ser5P	Apoe	uc009fmx.1	chr7	20281615	20284381
RNAP II total no Ser5P	Chchd4	uc009cyb.1	chr6	91414269	91423417
RNAP II total no Ser5P	Rnf44	uc007qot.1	chr13	54780772	54789078
RNAP II total no Ser5P	Saps3	uc008fwk.1	chr19	3454927	3575720
RNAP II total no Ser5P	Rpl22	uc008wah.1	chr4	151699986	151708180
RNAP II total no Ser5P	Dhx9	uc007daa.1	chr1	155311469	155334790
RNAP II total no Ser5P	Utp15	uc007rom.1	chr13	99016799	99032947
RNAP II total no Ser5P	BC024672	uc007qiq.1	chr13	49063655	49067402
RNAP II total no Ser5P	5730427N09Rik	uc007rnt.1	chr13	97903600	97907856
RNAP II total no Ser5P	Tyk2	uc009okf.1	chr9	20927903	20935719
RNAP II total no Ser5P	Sc4mol	uc009lux.1	chr8	67196941	67212375
RNAP II total no Ser5P	Phb2	uc009dri.1	chr6	124662306	124666963
RNAP II total no Ser5P	2810006K23Rik	uc008zpn.1	chr5	124778097	124791853
RNAP II total no Ser5P	Rpl13	uc009nue.1	chr8	125626315	125629140
RNAP II total no Ser5P	Gpc1	uc007cbs.1	chr1	94728262	94756773
RNAP II total no Ser5P	Atp6v1d	uc007nzj.1	chr12	79943968	79962625
RNAP II total no Ser5P	Trim8	uc008hts.1	chr19	46576137	46590945
RNAP II total no Ser5P	Btg2	uc007cre.1	chr1	135971441	135975732
RNAP II total no Ser5P	Suz12	uc007klc.1	chr11	79806607	79847625
RNAP II total no Ser5P	Smarcc1	uc009rtp.1	chr9	110034527	110142682
RNAP II total no Ser5P	Rassf7	uc009kka.1	chr7	148401758	148404557
RNAP II total no Ser5P	Ccne1	uc009gkr.1	chr7	38883002	38892509
RNAP II total no Ser5P	Cox17	uc007zet.1	chr16	38347084	38352849
RNAP II total no Ser5P	Ddx5	uc007lzs.1	chr11	106644758	106649808
RNAP II total no Ser5P	Mettl6	uc007sxq.1	chr14	32291983	32308163
RNAP II total no Ser5P	Ddx56	uc007hyc.1	chr11	6157547	6167732
RNAP II total no Ser5P	Pcf11	uc009iic.1	chr7	99792764	99818394
RNAP II total no Ser5P	Eed	uc009igk.1	chr7	97103185	97129480
RNAP II total no Ser5P	Naca	uc007hlc.1	chr10	127472628	127485689
RNAP II total no Ser5P	Slc29a1	uc008crb.1	chr17	45722170	45730381
RNAP II total no Ser5P	Arid1a	uc008vdh.1	chr4	133234922	133309526
RNAP II total no Ser5P	Zkscan1	uc009aej.1	chr5	138526311	138549050
RNAP II total no Ser5P	Srebf2	uc007wyi.1	chr15	81977698	82035390
RNAP II total no Ser5P	Aldh2	uc008zjt.1	chr5	122017695	122043833
RNAP II total no Ser5P	Exosc1	uc008hmm.1	chr19	41998212	42007784
RNAP II total no Ser5P	Zdhhc16	uc008hmp.1	chr19	42008004	42012340
RNAP II total no Ser5P	Spint1	uc008ltk.1	chr2	119063095	119075249
RNAP II total no Ser5P	B230219D22Rik	uc007qrx.1	chr13	55794484	55804861
RNAP II total no Ser5P	Gusb	uc008ztt.1	chr5	130464890	130478698
RNAP II total no Ser5P	Ywhaz	uc007vmz.1	chr15	36700524	36723999
RNAP II total no Ser5P	Abcf1	uc008cjk.1	chr17	36093763	36106695
RNAP II total no Ser5P	H2afj	uc009eme.1	chr6	136756768	136758595
RNAP II total no Ser5P	Ppard	uc008bqj.1	chr17	28369698	28433324
RNAP II total no Ser5P	G3bp2	uc008ycg.1	chr5	92481171	92511943
RNAP II total no Ser5P	Sec61g	uc007ibl.1	chr11	16401640	16408104
RNAP II total no Ser5P	Dnajb5	uc008som.1	chr4	42962738	42971604
RNAP II total no Ser5P	Adh5	uc008rnk.1	chr3	138106127	138118463
RNAP II total no Ser5P	Slc16a1	uc008qui.1	chr3	104442590	104462385
RNAP II total no Ser5P	Sirt6	uc007giy.1	chr10	81084531	81090303
RNAP II total no Ser5P	Moap1	uc007ouk.2	chr12	103979926	103996882
RNAP II total no Ser5P	Irf2bp1	uc009fkc.1	chr7	19589413	19592112
RNAP II total no Ser5P	Zfp408	uc008kwh.1	chr2	91483844	91489948
RNAP II total no Ser5P	Syk	uc007qmz.1	chr13	52678805	52744161
RNAP II total no Ser5P	Nat13	uc007zgz.1	chr16	44139921	44163477
RNAP II total no Ser5P	Pum1	uc008uzm.1	chr4	130219303	130337187
RNAP II total no Ser5P	Amotl2	uc009rfw.1	chr9	102619131	102635747
RNAP II total no Ser5P	1110054O05Rik	uc008tac.1	chr4	59782518	59796727
RNAP II total no Ser5P	Sf3b4	uc008qme.1	chr3	95976472	95981487
RNAP II total no Ser5P	Enc1	uc007rod.1	chr13	98011124	98022989
RNAP II total no Ser5P	Exosc2	uc008jdy.1	chr2	31526256	31536827
RNAP II total no Ser5P	Slc12a7	uc007red.1	chr13	73901144	73954190
RNAP II total no Ser5P	AK007459	uc008iuf.1	chr2	25994065	25995063
RNAP II total no Ser5P	Mapk1ip1	uc009kfc.1	chr7	146027500	146037950
RNAP II total no Ser5P	Csda	uc009eis.1	chr6	131314875	131338468
RNAP II total no Ser5P	Eif4ebp1	uc009lih.1	chr8	28370798	28386128
RNAP II total no Ser5P	Rapgef1	uc008izu.1	chr2	29475239	29595883
RNAP II total no Ser5P	Slc19a2	uc007did.1	chr1	166179185	166195499
RNAP II total no Ser5P	Rsl1d1	uc007yfb.1	chr16	11193129	11203385
RNAP II total no Ser5P	Cdk5rap3	uc007lcv.1	chr11	96769099	96777795
RNAP II total no Ser5P	Trim6	uc009ivq.1	chr7	111367308	111383666
RNAP II total no Ser5P	Cd9	uc009dun.1	chr6	125410283	125444773
RNAP II total no Ser5P	Psmd3	uc007lgx.1	chr11	98543867	98557292
RNAP II total no Ser5P	Sec23a	uc007npw.1	chr12	60059370	60113004
RNAP II total no Ser5P	Nap1l1	uc007had.1	chr10	110910282	110935198
RNAP II total no Ser5P	Ap3s2	uc009hzf.1	chr7	87020210	87065487
RNAP II total no Ser5P	Bsg	uc007fzl.1	chr10	79167102	79174724
RNAP II total no Ser5P	Pisd	uc008wzv.1	chr5	33078961	33128275
RNAP II total no Ser5P	Tmem131	uc007ard.1	chr1	36849033	36996372
RNAP II total no Ser5P	Cnbp	uc009cuc.1	chr6	87793073	87800989
RNAP II total no Ser5P	Ict1	uc007mhj.1	chr11	115265065	115272227
RNAP II total no Ser5P	2810403A07Rik	uc008pwg.1	chr3	88489739	88516844
RNAP II total no Ser5P	Lactb2	uc007aiu.1	chr1	13615979	13650590
RNAP II total no Ser5P	Eif3eip	uc007wsk.1	chr15	78905652	78924830
RNAP II total no Ser5P	Abcf2	uc008wsb.1	chr5	24071162	24083177
RNAP II total no Ser5P	Zfp445	uc009sfe.1	chr9	122760140	122775069
RNAP II total no Ser5P	Erh	uc007oaz.1	chr12	81735023	81744777
RNAP II total no Ser5P	Psmd4	uc008qht.1	chr3	94836626	94846467
RNAP II total no Ser5P	Mtch2	uc008ktn.1	chr2	90687311	90706791
RNAP II total no Ser5P	Zmiz2	uc007hyl.1	chr11	6289366	6306165
RNAP II total no Ser5P	Zfp568	uc009gct.1	chr7	30768975	30810130
RNAP II total no Ser5P	Tceb1	uc007ajv.1	chr1	16632845	16646946
RNAP II total no Ser5P	Pcnp	uc007zma.1	chr16	56015620	56029830
RNAP II total no Ser5P	Cdkn1a	uc008bsg.1	chr17	29230719	29237667
RNAP II total no Ser5P	AK084809	uc007ein.1	chr10	7511187	7512622
RNAP II total no Ser5P	Rmnd1	uc007ehc.1	chr10	5914206	5920447
RNAP II total no Ser5P	Adsl	uc007wvz.1	chr15	80778948	80799803
RNAP II total no Ser5P	Pabpn1	uc007txi.1	chr14	55512992	55516993
RNAP II total no Ser5P	Hint1	uc007iyj.1	chr11	54679939	54683998
RNAP II total no Ser5P	Hspa4	uc007ivq.1	chr11	53073315	53113981
RNAP II total no Ser5P	Cst3	uc008mtt.1	chr2	148697467	148701204
RNAP II total no Ser5P	Rpl37a	uc007bkv.1	chr1	72757863	72760259
RNAP II total no Ser5P	Sumo1	uc007bdx.1	chr1	59696277	59727678
RNAP II total no Ser5P	Dynll2	uc007kva.1	chr11	87793034	87801007
RNAP II total no Ser5P	Ssu72	uc008wej.1	chr4	155079232	155090787
RNAP II total no Ser5P	Hnrpd	uc008ygt.1	chr5	100384954	100407957
RNAP II total no Ser5P	2810410M20Rik	uc008dnx.1	chr17	74698826	74715761
RNAP II total no Ser5P	Med7	uc007iok.2	chr11	46250448	46256223
RNAP II total no Ser5P	Adnp	uc008oar.1	chr2	168006464	168055879
RNAP II total no Ser5P	Ndufb9	uc007vtw.1	chr15	58765364	58771044
RNAP II total no Ser5P	Btf3l4	uc008ubo.1	chr4	108486899	108506169
RNAP II total no Ser5P	Mrpl50	uc008svu.1	chr4	49525468	49533955
RNAP II total no Ser5P	Hmgb2	uc009lsx.1	chr8	59990672	59993284
RNAP II total no Ser5P	Diablo	uc008zny.1	chr5	123965827	123974173
RNAP II total no Ser5P	Prc1	uc009iaf.1	chr7	87439402	87457632
RNAP II total no Ser5P	Syngr1	uc007wvc.1	chr15	79921763	79943870
RNAP II total no Ser5P	Def8	uc009nwa.1	chr8	125966885	125987799
RNAP II total no Ser5P	Erf	uc009frz.1	chr7	26027578	26035684
RNAP II total no Ser5P	2610205E22Rik	uc008jcu.1	chr2	30663496	30673032
RNAP II total no Ser5P	Pex19	uc007dpq.1	chr1	174056902	174065911
RNAP II total no Ser5P	Psmc2	uc008wpd.1	chr5	21291100	21309602
RNAP II total no Ser5P	Jub	uc007twj.1	chr14	55186308	55196253
RNAP II total no Ser5P	Ranbp17	uc007ikh.1	chr11	33112418	33413626
RNAP II total no Ser5P	Prmt5	uc007twf.1	chr14	55126305	55136244
RNAP II total no Ser5P	Actr2	uc007ics.1	chr11	19962306	20012916
RNAP II total no Ser5P	2310046O06Rik	uc009pvc.1	chr9	57385830	57388484
RNAP II total no Ser5P	Gpx1	uc009rpf.1	chr9	108241606	108242671
RNAP II total no Ser5P	Txn2	uc007woh.1	chr15	77753649	77759424
RNAP II total no Ser5P	Cited2	uc007elt.1	chr10	17443051	17445461
RNAP II total no Ser5P	Calm3	uc009fin.1	chr7	17500727	17509381
RNAP II total no Ser5P	Krtcap2	uc008pyl.1	chr3	89050359	89053644
RNAP II total no Ser5P	Rps14	uc008fay.1	chr18	60934302	60938198
RNAP II total no Ser5P	Taf15	uc007kpf.1	chr11	83286609	83320242
RNAP II total no Ser5P	Cox7a2	uc009quv.1	chr9	79603047	79607660
RNAP II total no Ser5P	Rpl26	uc007joh.1	chr11	68715067	68718036
RNAP II total no Ser5P	Igfbp2	uc007bkw.1	chr1	72871076	72899045
RNAP II total no Ser5P	Atp5g3	uc008kdm.1	chr2	73746506	73749351
RNAP II total no Ser5P	Glud1	uc007tas.1	chr14	35123936	35158091
RNAP II total no Ser5P	Atg2b	uc007oyp.1	chr12	106851748	106923451
RNAP II total no Ser5P	BC030867	uc007lqz.1	chr11	102110195	102126497
RNAP II total no Ser5P	Rnf7	uc009rcm.1	chr9	96371375	96379014
RNAP II total no Ser5P	Cox4i1	uc009nrh.1	chr8	123192189	123198109
RNAP II total no Ser5P	Usf1	uc007doj.1	chr1	173341458	173348873
RNAP II total no Ser5P	Prpsap1	uc007mld.1	chr11	116332169	116351651
RNAP II total no Ser5P	Amd2	uc007ews.1	chr10	40007263	40021978
RNAP II total no Ser5P	Sppl3	uc008zda.1	chr5	115461532	115548799
RNAP II total no Ser5P	Slc25a10	uc007mtb.1	chr11	120353185	120360480
RNAP II total no Ser5P	Rpl30	uc007vlr.1	chr15	34370264	34372977
RNAP II total no Ser5P	Prmt6	uc008rau.1	chr3	110051463	110053916
RNAP II total no Ser5P	Trp53	uc007jqn.1	chr11	69393889	69405375
RNAP II total no Ser5P	1200016B10Rik	uc007cyq.1	chr1	153214828	153275511
RNAP II total no Ser5P	Ptges3	uc007hld.1	chr10	127496037	127514310
RNAP II total no Ser5P	Rft1	uc007svn.1	chr14	31467560	31504499
RNAP II total no Ser5P	Zfp62	uc007ipy.1	chr11	49017232	49032318
RNAP II total no Ser5P	Sepw1	uc009fgp.1	chr7	16502556	16507720
RNAP II total no Ser5P	Fblim1	uc008vos.1	chr4	141131976	141161947
RNAP II total no Ser5P	Marveld1	uc008hni.1	chr19	42221889	42226193
RNAP II total no Ser5P	Stxbp2	uc009kse.1	chr8	3631159	3643644
RNAP II total no Ser5P	Zcchc8	uc008zoh.1	chr5	124149806	124170949
RNAP II total no Ser5P	BC024814	uc007ycl.1	chr16	8470905	8490290
RNAP II total no Ser5P	Sae2	uc009giu.1	chr7	34925715	34953548
RNAP II total no Ser5P	Pdk1	uc008kbj.1	chr2	71711328	71740731
RNAP II total no Ser5P	Rpl11	uc008vhr.1	chr4	135605862	135609286
RNAP II total no Ser5P	Kcnk5	uc007siz.1	chr14	20959279	21001004
RNAP II total no Ser5P	Zfp428	uc009fpu.1	chr7	25292204	25300684
RNAP II total no Ser5P	Dnmt3b	uc008nib.1	chr2	153475192	153513463
RNAP II total no Ser5P	Nolc1	uc008hsg.1	chr19	46150352	46160020
RNAP II total no Ser5P	Rnf168	uc007yyo.1	chr16	32277574	32300992
RNAP II total no Ser5P	H3f3a	uc007dwr.1	chr1	182732698	182743734
RNAP II total no Ser5P	Ttc1	uc007imx.1	chr11	43543507	43561475
RNAP II total no Ser5P	Klf4	uc008sxk.1	chr4	55540140	55545338
RNAP II total no Ser5P	Supv3l1	uc007fhd.1	chr10	61892125	61912441
RNAP II total no Ser5P	Icosl	uc007fxi.1	chr10	77532112	77542270
RNAP II total no Ser5P	Slc38a2	uc007xkm.1	chr15	96517822	96530129
RNAP II total no Ser5P	Rpl15	uc007shr.1	chr14	19100336	19103500
RNAP II total no Ser5P	Zwint	uc007fpa.1	chr10	72117642	72137712
RNAP II total no Ser5P	Nvl	uc007dxb.1	chr1	183023553	183074288
RNAP II total no Ser5P	Cbx3	uc009bxr.1	chr6	51420614	51433703
RNAP II total no Ser5P	Med10	uc007rcq.1	chr13	69948759	69954972
RNAP II total no Ser5P	Glrx3	uc009kex.1	chr7	144629330	144660277
RNAP II total no Ser5P	Ptcd3	uc009chr.1	chr6	71830631	71858756
RNAP II total no Ser5P	Ppp1r15b	uc007cps.1	chr1	135027920	135033805
RNAP II total no Ser5P	Sp3	uc008kcc.1	chr2	72774489	72818503
RNAP II total no Ser5P	Relt	uc009int.1	chr7	107994361	108011909
RNAP II total no Ser5P	Rad9b	uc008zla.1	chr5	122802516	122804233
RNAP II total no Ser5P	Dck	uc008yah.1	chr5	89194037	89212302
RNAP II total no Ser5P	Spry2	uc007uxy.1	chr14	106291733	106296036
RNAP II total no Ser5P	Ezh2	uc009btb.1	chr6	47480279	47545019
RNAP II total no Ser5P	Mvk	uc008yzr.1	chr5	114894314	114910599
RNAP II total no Ser5P	Tbc1d13	uc008jbj.1	chr2	29989390	30007533
RNAP II total no Ser5P	9530068E07Rik	uc007ivo.1	chr11	52209929	52222225
RNAP II total no Ser5P	Slc1a5	uc009fib.1	chr7	17366694	17383623
RNAP II total no Ser5P	Pigu	uc008nkj.1	chr2	155158381	155183160
RNAP II total no Ser5P	Hat1	uc008kaq.1	chr2	71227316	71279679
RNAP II total no Ser5P	Rad23b	uc008sxj.1	chr4	55362935	55404084
RNAP II total no Ser5P	Ncln	uc007gig.1	chr10	80949203	80959108
RNAP II total no Ser5P	Rpl34	uc008rjd.1	chr3	130429748	130433226
RNAP II total no Ser5P	2310079F23Rik	uc008xdu.1	chr5	35899986	35917709
RNAP II total no Ser5P	Rps13	uc009jje.1	chr7	123475025	123477648
RNAP II total no Ser5P	1700022C21Rik	uc008clq.1	chr17	37095536	37102568
RNAP II total no Ser5P	Adprh	uc007zex.1	chr16	38445478	38452769
RNAP II total no Ser5P	Wsb1	uc007kki.1	chr11	79052883	79068197
RNAP II total no Ser5P	Ankrd49	uc009oez.1	chr9	14584639	14589005
RNAP II total no Ser5P	Ccdc95	uc009jte.1	chr7	134003028	134005531
RNAP II total no Ser5P	Txnl1	uc008fdx.1	chr18	63822454	63852013
RNAP II total no Ser5P	Cdkn2aipnl	uc007ius.1	chr11	51781164	51790838
RNAP II total no Ser5P	Arcn1	uc009pei.1	chr9	44550227	44575891
RNAP II total no Ser5P	Snrpb2	uc008mqb.1	chr2	142888804	142897788
RNAP II total no Ser5P	Tbl1xr1	uc008osw.1	chr3	21975573	22115516
RNAP II total no Ser5P	Cct2	uc007hcs.1	chr10	116488053	116500870
RNAP II total no Ser5P	Exo1	uc007dtu.1	chr1	177810928	177839424
RNAP II total no Ser5P	Ctsd	uc009kmv.1	chr7	149561820	149573775
RNAP II total no Ser5P	Ppp1r14a	uc009gbn.1	chr7	30074338	30078409
RNAP II total no Ser5P	Jagn1	uc009dge.1	chr6	113392603	113398221
RNAP II total no Ser5P	Anapc5	uc008zmf.1	chr5	123237469	123271348
RNAP II total no Ser5P	Oaz1	uc007gew.1	chr10	80289400	80292035
RNAP II total no Ser5P	Rnpep	uc007csy.1	chr1	137159288	137180606
RNAP II total no Ser5P	D19Wsu162e	uc008htx.1	chr19	46673640	46731874
RNAP II total no Ser5P	Rpl36al	uc007nrs.1	chr12	70283729	70285027
RNAP II total no Ser5P	Ilf3	uc009old.1	chr9	21172446	21209805
RNAP II total no Ser5P	Map2k2	uc007gfx.1	chr10	80568707	80587081
RNAP II total no Ser5P	Gmps	uc008pke.1	chr3	63780064	63823000
RNAP II total no Ser5P	Arhgdia	uc007mtj.1	chr11	120438548	120442561
RNAP II total no Ser5P	Bat3	uc008cgd.1	chr17	35272430	35279550
RNAP II total no Ser5P	Fnta	uc009lhi.1	chr8	27109193	27126073
RNAP II total no Ser5P	Sfrs5	uc007obm.1	chr12	82046490	82047835
RNAP II total no Ser5P	Upp1	uc007hzw.1	chr11	9018105	9036167
RNAP II total no Ser5P	Utf1	uc009kgf.1	chr7	147129754	147131011
RNAP II total no Ser5P	D10Jhu81e	uc007fxj.1	chr10	77624811	77632513
RNAP II total no Ser5P	Raly	uc008njr.1	chr2	154616892	154692979
RNAP II total no Ser5P	Cnot7	uc009lmr.1	chr8	41578389	41597076
RNAP II total no Ser5P	Id1	uc008ngf.1	chr2	152562009	152563146
RNAP II total no Ser5P	Nol9	uc008vzf.1	chr4	151413444	151435603
RNAP II total no Ser5P	C130032J12Rik	uc007thy.1	chr14	47917988	47942766
RNAP II total no Ser5P	Hmgn1	uc008aco.1	chr16	96343194	96349332
RNAP II total no Ser5P	Cenpm	uc007wyn.1	chr15	82064205	82075177
RNAP II total no Ser5P	Arfgap1	uc008okj.1	chr2	180701973	180717147
RNAP II total no Ser5P	Nrf1	uc009bet.1	chr6	29997987	30095197
RNAP II total no Ser5P	Dnajc19	uc008oxp.1	chr3	33976355	33980248
RNAP II total no Ser5P	Eef1a1	uc009qun.1	chr9	78326260	78329531
RNAP II total no Ser5P	Rad21	uc007vrd.1	chr15	51794151	51823108
RNAP II total no Ser5P	Rrp1	uc007fxs.1	chr10	77863106	77875788
RNAP II total no Ser5P	Trub2	uc008jaa.1	chr2	29631630	29644022
RNAP II total no Ser5P	Gars	uc009cai.1	chr6	54987994	55029498
RNAP II total no Ser5P	Ube2d3	uc008rln.1	chr3	135101260	135130142
RNAP II total no Ser5P	Wibg	uc007hod.1	chr10	128185017	128203146
RNAP II total no Ser5P	Rpl39	uc009syc.1	chrX	34622514	34625179
RNAP II total no Ser5P	Csnk1d	uc007mva.1	chr11	120823054	120852647
RNAP II total no Ser5P	Eif3f	uc009jdc.1	chr7	116077929	116085201
RNAP II total no Ser5P	2810452K22Rik	uc007pcc.1	chr12	112110831	112127324
RNAP II total no Ser5P	Cables2	uc008oiu.1	chr2	179997782	180008170
RNAP II total no Ser5P	Nfatc2ip	uc009jra.1	chr7	133526367	133540251
RNAP II total no Ser5P	Ccdc97	uc009ftr.1	chr7	26496135	26504072
RNAP II total no Ser5P	Bzw1	uc007bbq.1	chr1	58449940	58463392
RNAP II total no Ser5P	Rbx1	uc007wwq.1	chr15	81296745	81306799
RNAP II total no Ser5P	Erp29	uc008zjf.1	chr5	121894761	121902483
RNAP II total no Ser5P	B230315N10Rik	uc007gjl.1	chr10	81687598	81704025
RNAP II total no Ser5P	Gtf2a2	uc009qns.1	chr9	69860356	69870654
RNAP II total no Ser5P	Hspd1	uc007bab.1	chr1	55134678	55144689
RNAP II total no Ser5P	Hspe1	uc007bac.1	chr1	55145160	55148150
RNAP II total no Ser5P	Zer1	uc008jbf.1	chr2	29952802	29979974
RNAP II total no Ser5P	Psma6	uc007noq.1	chr12	56499883	56519438
RNAP II total no Ser5P	Skp1a	uc007ivf.1	chr11	52045510	52060360
RNAP II total no Ser5P	Saal1	uc009gyt.1	chr7	53943542	53966031
RNAP II total no Ser5P	1500003O22Rik	uc009iyz.1	chr7	112880722	112885014
RNAP II total no Ser5P	Dnajc8	uc008vbm.1	chr4	132091470	132109650
RNAP II total no Ser5P	Phlda3	uc007ctq.1	chr1	137662709	137665711
RNAP II total no Ser5P	Nedd4	uc009qqe.1	chr9	72510153	72597655
RNAP II total no Ser5P	Pim3	uc007xeq.1	chr15	88692623	88696156
RNAP II total no Ser5P	Atp5a1	uc008fru.1	chr18	78012506	78021607
RNAP II total no Ser5P	Ppp2r2a	uc007uku.1	chr14	67632892	67691281
RNAP II total no Ser5P	Cxadr	uc007zsn.1	chr16	78301935	78340996
RNAP II total no Ser5P	Zfp36l2	uc008dsq.1	chr17	84583268	84587287
RNAP II total no Ser5P	Oprs1	uc008sjk.1	chr4	41685368	41688186
RNAP II total no Ser5P	Ewsr1	uc007hvw.1	chr11	4969690	4999080
RNAP II total no Ser5P	A030007L17Rik	uc009cah.1	chr6	54935088	54942861
RNAP II total no Ser5P	Dbr1	uc009rei.1	chr9	99476217	99484762
RNAP II total no Ser5P	AK148054	uc008gfk.1	chr19	5842306	5845476
RNAP II total no Ser5P	Mreg	uc007bkg.1	chr1	72206018	72258881
RNAP II total no Ser5P	Gpi1	uc009gix.1	chr7	34987176	35015281
RNAP II total no Ser5P	Rhot1	uc007klp.1	chr11	80022615	80081409
RNAP II total no Ser5P	Mat2b	uc007ilp.1	chr11	40492815	40506115
RNAP II total no Ser5P	Suv420h2	uc009eyi.1	chr7	4691716	4699089
RNAP II total no Ser5P	Eif1a	uc008evs.1	chr18	46757357	46769862
RNAP II total no Ser5P	Plekhf2	uc008ryw.1	chr4	10915808	10934707
RNAP II total no Ser5P	Lsg1	uc007ywv.1	chr16	30561454	30587675
RNAP II total no Ser5P	Epn2	uc007jhw.1	chr11	61330750	61393153
RNAP II total no Ser5P	Slc20a1	uc008mhk.1	chr2	129024535	129030840
RNAP II total no Ser5P	Pgam1	uc008hml.1	chr19	41986360	41993155
RNAP II total no Ser5P	Pvrl2	uc009fne.1	chr7	20309513	20334818
RNAP II total no Ser5P	Psma4	uc009pru.1	chr9	54798665	54805837
RNAP II total no Ser5P	Slc9a8	uc008nzp.1	chr2	167247220	167302498
RNAP II total no Ser5P	Scd2	uc008hpp.1	chr19	44368577	44381350
RNAP II total no Ser5P	Ppp4r1	uc008dgj.1	chr17	66132755	66191186
RNAP II total no Ser5P	Tomm20	uc009nza.1	chr8	129458449	129469730
RNAP II total no Ser5P	Zfp105	uc009sfi.1	chr9	122832195	122840146
RNAP II total no Ser5P	Tial1	uc009jyz.1	chr7	135583290	135605027
RNAP II total no Ser5P	1110029E03Rik	uc008sqj.1	chr4	43591606	43600359
RNAP II total no Ser5P	Polr2a	uc007jrk.1	chr11	69547911	69571725
RNAP II total no Ser5P	4833442J19Rik	uc009etw.1	chr6	149090118	149093654
RNAP II total no Ser5P	Tulp3	uc009edh.1	chr6	128271178	128305869
RNAP II total no Ser5P	Insig1	uc008wtu.1	chr5	28397906	28405201
RNAP II total no Ser5P	Zc3h11a	uc007cqo.1	chr1	135516447	135557957
RNAP II total no Ser5P	Fasn	uc007mut.1	chr11	120667271	120685861
RNAP II total no Ser5P	Ensa	uc008qkk.1	chr3	95428901	95436039
RNAP II total no Ser5P	Wdr70	uc007veh.1	chr15	8042228	8049209
RNAP II total no Ser5P	Cfl2	uc007nnx.1	chr12	55959805	55963864
RNAP II total no Ser5P	Dcakd	uc007ltc.1	chr11	102855369	102878461
RNAP II total no Ser5P	Ccdc66	uc007stx.1	chr14	28304973	28321646
RNAP II total no Ser5P	Alkbh4	uc009aaa.1	chr5	136612023	136617484
RNAP II total no Ser5P	Phf5a	uc007wxo.1	chr15	81694945	81702322
RNAP II total no Ser5P	Pdcl	uc008jmp.1	chr2	37205593	37214752
RNAP II total no Ser5P	Mcm10	uc008ifi.1	chr2	4911793	4933781
RNAP II total no Ser5P	Tuba1a	uc007xok.1	chr15	98780277	98783932
RNAP II total no Ser5P	Stmn1	uc008vfc.1	chr4	134024325	134029754
RNAP II total no Ser5P	Cstf1	uc008ocp.1	chr2	172196196	172206586
RNAP II total no Ser5P	Maea	uc008xaq.1	chr5	33678220	33715943
RNAP II total no Ser5P	Nktr	uc009sdr.1	chr9	121628298	121665959
RNAP II total no Ser5P	B930006L02Rik	uc009inq.1	chr7	107855215	107990144
RNAP II total no Ser5P	Fam100a	uc007yao.1	chr16	4874784	4879818
RNAP II total no Ser5P	Zfp459	uc007rat.1	chr13	67506657	67522354
RNAP II total no Ser5P	9030624J02Rik	uc009jko.1	chr7	125884254	125984999
RNAP II total no Ser5P	Ddx3x	uc009srl.1	chrX	12858163	12869740
RNAP II total no Ser5P	P4hb	uc007mti.1	chr11	120421617	120434250
RNAP II total no Ser5P	Jam2	uc007ztg.1	chr16	84774367	84823129
RNAP II total no Ser5P	Psmb6	uc007jve.1	chr11	70338909	70341151
RNAP II total no Ser5P	Ranbp1	uc007ymy.1	chr16	18240071	18248787
RNAP II total no Ser5P	Htf9c	uc007ynd.1	chr16	18249578	18250812
RNAP II total no Ser5P	Ranbp3	uc008dcu.1	chr17	56812679	56849215
RNAP II total no Ser5P	Fem1a	uc008dbk.1	chr17	56396244	56400498
RNAP II total no Ser5P	Klhl12	uc007csa.1	chr1	136352131	136387450
RNAP II total no Ser5P	Ranbp5	uc007uzz.1	chr14	121310415	121347266
RNAP II total no Ser5P	Phf17	uc008pcj.1	chr3	41359653	41420779
RNAP II total no Ser5P	Cdc2a	uc007fmr.1	chr10	68799382	68815660
RNAP II total no Ser5P	AA408296	uc007edw.1	chr1	194930596	194956445
RNAP II total no Ser5P	Ccnf	uc008avi.1	chr17	24373917	24388354
RNAP II total no Ser5P	2810408M09Rik	uc008nxu.1	chr2	165315611	165318814
RNAP II total no Ser5P	Rrbp1	uc008mqj.1	chr2	143773130	143836999
RNAP II total no Ser5P	Zfp192	uc007pqr.1	chr13	21605090	21622980
RNAP II total no Ser5P	Snrpg	uc009crm.1	chr6	86321533	86328896
RNAP II total no Ser5P	Ubxd4	uc007myr.1	chr12	4885837	4914326
RNAP II total no Ser5P	Hmgb1	uc009apc.1	chr5	149858803	149863026
RNAP II total no Ser5P	Efna4	uc008pys.1	chr3	89137314	89141950
RNAP II total no Ser5P	Rrp1b	uc008bvt.1	chr17	32173106	32197549
RNAP II total no Ser5P	Ift88	uc007udb.1	chr14	58042962	58136773
RNAP II total no Ser5P	Wdr82	uc009rjc.1	chr9	106073259	106094037
RNAP II total no Ser5P	Ankrd41	uc009mdc.1	chr8	73929914	73933803
RNAP II total no Ser5P	Ppm1f	uc007yjo.1	chr16	16896561	16927455
RNAP II total no Ser5P	Mthfsd	uc009nro.1	chr8	123621456	123632279
RNAP II total no Ser5P	Dnttip2	uc008rep.1	chr3	121977331	121988189
RNAP II total no Ser5P	BC027344	uc009gcg.1	chr7	30628954	30638667
RNAP II total no Ser5P	Yme1l1	uc008ioe.1	chr2	23012065	23054156
RNAP II total no Ser5P	Tyms	uc008wuy.1	chr5	30385366	30400121
RNAP II total no Ser5P	Tnfrsf10b	uc007umu.1	chr14	70167335	70179493
RNAP II total no Ser5P	Ipo9	uc007cte.1	chr1	137278891	137327068
RNAP II total no Ser5P	Ccdc72	uc009rrw.1	chr9	108980501	108984895
RNAP II total no Ser5P	Gtpbp10	uc008wis.1	chr5	5537456	5559501
RNAP II total no Ser5P	Eif4enif1	uc007hsf.1	chr11	3103023	3142721
RNAP II total no Ser5P	Eif3c	uc009jrw.1	chr7	133690424	133709880
RNAP II total no Ser5P	0610009K11Rik	uc008vky.1	chr4	137990586	137998180
RNAP II total no Ser5P	Ahcy	uc008nka.1	chr2	154885047	154900162
RNAP II total no Ser5P	Snx11	uc007lci.1	chr11	96628868	96638845
RNAP II total no Ser5P	Psmb4	uc008qhe.1	chr3	94688245	94690854
RNAP II total no Ser5P	Gja1	uc007fce.1	chr10	56097152	56110223
RNAP II total no Ser5P	Akr1b3	uc009bgy.1	chr6	34253933	34267471
RNAP II total no Ser5P	Cyr61	uc008rqq.1	chr3	145309939	145312945
RNAP II total no Ser5P	Taf5l	uc009nww.1	chr8	126520215	126544908
RNAP II total no Ser5P	Abce1	uc009mit.1	chr8	82207340	82235639
RNAP II total no Ser5P	C78339	uc007qhi.1	chr13	46764890	46771142
RNAP II total no Ser5P	Pmm1	uc007wxu.1	chr15	81785983	81791294
RNAP II total no Ser5P	Khdrbs1	uc008uyc.1	chr4	129380980	129419526
RNAP II total no Ser5P	Bola3	uc009cnh.1	chr6	83299477	83308386
RNAP II total no Ser5P	Nusap1	uc008lua.1	chr2	119444033	119475896
RNAP II total no Ser5P	Zfp386	uc007phb.1	chr12	117285934	117299062
RNAP II total no Ser5P	Trim35	uc007ukd.1	chr14	66915861	66930261
RNAP II total no Ser5P	Sox4	uc007pyk.1	chr13	29042598	29045551
RNAP II total no Ser5P	Phlpp	uc007cgv.1	chr1	108069587	108290822
RNAP II total no Ser5P	6820431F20Rik	uc009lbe.1	chr8	19990922	20020385
RNAP II total no Ser5P	1110020P15Rik	uc007hvb.1	chr11	4601970	4604347
RNAP II total no Ser5P	AK015493	uc009pwy.1	chr9	58302979	58317430
RNAP II total no Ser5P	Prkab1	uc008zew.1	chr5	116463598	116474437
RNAP II total no Ser5P	Anp32b	uc008stt.1	chr4	46463988	46485395
RNAP II total no Ser5P	Dyrk3	uc007cmw.1	chr1	133025017	133034811
RNAP II total no Ser5P	Ppp1r10	uc008cjj.1	chr17	36054142	36069228
RNAP II total no Ser5P	Ppp5c	uc009fiq.1	chr7	17590001	17613219
RNAP II total no Ser5P	AK044422	uc007uil.1	chr14	65206951	65212798
RNAP II total no Ser5P	Slc25a5	uc009sxs.1	chrX	34335646	34338801
RNAP II total no Ser5P	Nek2	uc007ecy.1	chr1	193645440	193656921
RNAP II total no Ser5P	Zfp346	uc007qpy.1	chr13	55206669	55236432
RNAP II total no Ser5P	Kifc1	uc008bzw.1	chr17	34012610	34027561
RNAP II total no Ser5P	2010003J03Rik	uc008gct.1	chr19	5366812	5371511
RNAP II total no Ser5P	Ppp4r2	uc009dcb.1	chr6	100783631	100818711
RNAP II total no Ser5P	Ssr2	uc008pvs.1	chr3	88383562	88392335
RNAP II total no Ser5P	Tcf15	uc008nex.1	chr2	151969344	151974832
RNAP II total no Ser5P	Cyb5r1	uc007cru.1	chr1	136302566	136308315
RNAP II total no Ser5P	BC063263	uc009gmb.1	chr7	49729082	49761096
RNAP II total no Ser5P	Id2	uc007nfe.1	chr12	25778663	25780933
RNAP II total no Ser5P	Otud4	uc009mir.1	chr8	82163574	82201654
RNAP II total no Ser5P	Gli1	uc007hjh.1	chr10	126774895	126778942
RNAP II total no Ser5P	Rfc5	uc008zft.1	chr5	117836312	117839032
RNAP II total no Ser5P	Usp49	uc008cvw.1	chr17	47808992	47819811
RNAP II total no Ser5P	Ptplb	uc007zbi.1	chr16	35022506	35109261
RNAP II total no Ser5P	AK014378	uc009eux.1	chr7	3422334	3424165
RNAP II total no Ser5P	Atpif1	uc008vbl.1	chr4	132086474	132089850
RNAP II total no Ser5P	Ldb1	uc008hrz.1	chr19	46107090	46114111
RNAP II total no Ser5P	Ddx18	uc007cjw.1	chr1	123450415	123464505
RNAP II total no Ser5P	Tmem11	uc007jgs.1	chr11	60677955	60692534
RNAP II total no Ser5P	Pgd	uc008vvv.1	chr4	148524093	148540816
RNAP II total no Ser5P	Fbxw9	uc009mpd.1	chr8	87584017	87591019
RNAP II total no Ser5P	Psmd2	uc007yqq.1	chr16	20651777	20663487
RNAP II total no Ser5P	Oxa1l	uc007tvt.1	chr14	54980524	54984179
RNAP II total no Ser5P	Rnf12	uc009tzz.1	chrX	101152505	101176604
RNAP II total no Ser5P	Cct4	uc007ieo.1	chr11	22890592	22903336
RNAP II total no Ser5P	Rps15a	uc009jjn.1	chr7	125247889	125259661
RNAP II total no Ser5P	Ccng1	uc007ilz.1	chr11	40562053	40568788
RNAP II total and Ser5P	Sfrs7	uc008dqr.1	chr17	80599419	80606625
RNAP II total and Ser5P	Mycn	uc007nbg.1	chr12	12942898	12948514
RNAP II total and Ser5P	Ddit4	uc007fee.1	chr10	59412422	59414518
RNAP II total and Ser5P	Rcn3	uc009gta.1	chr7	52338282	52347522
RNAP II total and Ser5P	Sertad1	uc009fwh.1	chr7	28271971	28275333
RNAP II total and Ser5P	Zmiz1	uc007srn.1	chr14	26278777	26484195
RNAP II total and Ser5P	3110043J09Rik	uc007xci.1	chr15	84550508	84602631
RNAP II total and Ser5P	3300002I08Rik	uc008mtz.1	chr2	150136672	150188501
RNAP II total and Ser5P	AK003573	uc007aha.1	chr1	9932105	9934199
RNAP II total and Ser5P	Agpat3	uc007fxr.1	chr10	77736816	77815187
RNAP II total and Ser5P	Sema6c	uc008qih.1	chr3	94964426	94977238
RNAP II total and Ser5P	Esrrb	uc007oht.1	chr12	87702066	87862570
RNAP II total and Ser5P	Dnmbp	uc008hoy.1	chr19	43922456	43986882
RNAP II total and Ser5P	Cacng7	uc009euu.1	chr7	3333054	3366537
RNAP II total and Ser5P	Fgf4	uc009kqq.1	chr7	152047290	152051148
RNAP II total and Ser5P	1700067K01Rik	uc009mlo.1	chr8	86525419	86528669
RNAP II total and Ser5P	H3f3b	uc007mjo.1	chr11	115883274	115885818
RNAP II total and Ser5P	Dpys	uc007vol.1	chr15	39614243	39689013
RNAP II total and Ser5P	Hsp90aa1	uc007pbr.1	chr12	111929245	111934605
RNAP II total and Ser5P	Ccdc9	uc009fhm.1	chr7	16859393	16872129
RNAP II total and Ser5P	Nsmce4a	uc009kad.1	chr7	137676036	137690863
RNAP II total and Ser5P	Otx2	uc007tjs.1	chr14	49277353	49287181
RNAP II total and Ser5P	Tspyl2	uc009uqg.1	chrX	148771394	148777027
RNAP II total and Ser5P	Chaf1b	uc008aac.1	chr16	93884145	93906351
RNAP II total and Ser5P	Zfp653	uc009onp.1	chr9	21859903	21875789
RNAP II total and Ser5P	Mcl1	uc008qkl.1	chr3	95462642	95467101
RNAP II total and Ser5P	Dlgap3	uc008uuo.1	chr4	126845920	126914265
RNAP II total and Ser5P	Sgk	uc007eov.1	chr10	21601989	21719695
RNAP II total and Ser5P	Slc7a3	uc009twt.1	chrX	98274559	98280691
RNAP II total and Ser5P	Adamtsl4	uc008qkm.1	chr3	95480126	95491781
RNAP II total and Ser5P	AK016307	uc007xol.1	chr15	98816395	98819712
RNAP II total and Ser5P	Trh	uc009cyw.1	chr6	92192055	92194642
RNAP II total and Ser5P	Nol12	uc007wrw.1	chr15	78765362	78772340
RNAP II total and Ser5P	Ifitm3	uc009kjc.1	chr7	148195488	148196643
RNAP II total and Ser5P	Ppia	uc007hyn.1	chr11	6315872	6319813
RNAP II total and Ser5P	Srcrb4d	uc008zzj.1	chr5	136436093	136443913
RNAP II total and Ser5P	Acbd4	uc007lth.1	chr11	102963001	102973513
RNAP II total and Ser5P	AK019743	uc008uvv.1	chr4	128727331	128735227
RNAP II total and Ser5P	Agtrap	uc008vtz.1	chr4	147451169	147462173
RNAP II total and Ser5P	Unc13a	uc009meh.1	chr8	74153321	74195546
RNAP II total and Ser5P	Zfp36	uc009fys.1	chr7	29161802	29164247
RNAP II total and Ser5P	Nrtn	uc008ddc.1	chr17	56890747	56896953
RNAP II total and Ser5P	Zfp469	uc009ajg.1	chr5	143516533	143579066
RNAP II total and Ser5P	Ubb	uc007jjg.1	chr11	62365005	62366714
RNAP II total and Ser5P	Klf9	uc008gzz.1	chr19	23215715	23241401
RNAP II total and Ser5P	Pgpep1	uc009mbc.1	chr8	73173009	73183580
RNAP II total and Ser5P	Zscan22	uc009fel.1	chr7	13483163	13493588
RNAP II total and Ser5P	Rpn1	uc009cva.1	chr6	88034509	88055298
RNAP II total and Ser5P	Vdac1	uc007ivm.1	chr11	52174616	52202898
RNAP II total and Ser5P	Snf1lk	uc008bvr.1	chr17	31981194	31992737
RNAP II total and Ser5P	Bhlhb2	uc009ddn.1	chr6	108610622	108616919
RNAP II total and Ser5P	2510006D16Rik	uc008uxp.1	chr4	129277950	129285123
RNAP II total and Ser5P	Cabp1	uc008zdg.1	chr5	115618699	115636130
RNAP II total and Ser5P	Rps23	uc007rjq.1	chr13	91062780	91064331
RNAP II total and Ser5P	Socs3	uc007moi.1	chr11	117827400	117830476
RNAP II total and Ser5P	Ptma	uc007bvp.1	chr1	88423310	88427273
RNAP II total and Ser5P	Pigv	uc008vdf.1	chr4	133216301	133228535
RNAP II total and Ser5P	Fbxo5	uc007egj.1	chr10	4541075	4547383
RNAP II total and Ser5P	Pim1	uc008bsz.1	chr17	29627989	29632404
RNAP II total and Ser5P	St3gal2	uc009nlj.1	chr8	113443821	113493723
RNAP II total and Ser5P	Rpl37	uc007vcs.1	chr15	5066644	5069140
RNAP II total and Ser5P	Agxt2l2	uc007itw.1	chr11	51398258	51406330
RNAP II total and Ser5P	4930539E08Rik	uc008bru.1	chr17	29033339	29052269
RNAP II total and Ser5P	AK006070	uc008obn.1	chr2	168803768	168804403
RNAP II total and Ser5P	Tmem40	uc009dja.1	chr6	115679156	115708979
RNAP II total and Ser5P	Tsc22d1	uc007uri.1	chr14	76815627	76907568
RNAP II total and Ser5P	Sox12	uc008nfi.1	chr2	152219347	152223782
RNAP II total and Ser5P	Dppa5	uc009qug.1	chr9	78214862	78215961
RNAP II total and Ser5P	Bcl7c	uc009jwk.1	chr7	134806850	134852280
RNAP II total and Ser5P	1500032D16Rik	uc008bve.1	chr17	31657059	31668270
RNAP II total and Ser5P	L1td1	uc008tuj.1	chr4	98393444	98405177
RNAP II total and Ser5P	H13	uc008ngc.1	chr2	152495234	152532560
RNAP II total and Ser5P	Phc1	uc009dpc.1	chr6	122273025	122289656
RNAP II total and Ser5P	C230021P08Rik	uc007xpn.1	chr15	99252464	99288179
RNAP II total and Ser5P	Bahd1	uc008lsw.1	chr2	118727350	118750260
RNAP II total and Ser5P	Wwc1	uc007ili.1	chr11	35652679	35793591
RNAP II total and Ser5P	Manba	uc008rlv.1	chr3	135148631	135234367
RNAP II total and Ser5P	Snrpe	uc007cql.1	chr1	135500458	135506840
RNAP II total and Ser5P	AK086439	uc008kaz.1	chr2	71586131	71588219
RNAP II total and Ser5P	Rps7	uc007nfs.1	chr12	29315963	29320790
RNAP II total and Ser5P	Cldn12	uc008wip.1	chr5	5505108	5514730
RNAP II total and Ser5P	Elf1	uc007utb.1	chr14	79881000	79982283
RNAP II total and Ser5P	Sesn2	uc008vbj.1	chr4	132048721	132066371
RNAP II total and Ser5P	Got1	uc008hoi.1	chr19	43574244	43598999
RNAP II total and Ser5P	Lrp11	uc007ehv.1	chr10	7309614	7328437
RNAP II total and Ser5P	BC031853	uc009mzg.1	chr8	98359822	98377391
RNAP II total and Ser5P	Klf2	uc009mfq.1	chr8	74842931	74845248
RNAP II total and Ser5P	4930579G22Rik	uc008ztq.1	chr5	130384409	130389658
RNAP II total and Ser5P	Rrm2	uc007ner.1	chr12	25393147	25398972
RNAP II total and Ser5P	BC066135	uc008oiw.1	chr2	180012350	180024584
RNAP II total and Ser5P	Rps3a	uc008prc.1	chr3	85941867	85946515
RNAP II total and Ser5P	Ube2s	uc009eyt.1	chr7	4759615	4763942
RNAP II total and Ser5P	F11r	uc007doo.1	chr1	173367691	173394724
RNAP II total and Ser5P	AK017316	uc008yhl.1	chr5	100849860	100858535
RNAP II total and Ser5P	Ier5l	uc008jco.1	chr2	30328160	30329719
RNAP II total and Ser5P	Gltp	uc008yzw.1	chr5	115119510	115140944
RNAP II total and Ser5P	6430527G18Rik	uc007oia.1	chr12	88221650	88225761
RNAP II total and Ser5P	Cox7c	uc007riy.1	chr13	86184402	86186400
RNAP II total and Ser5P	Txnrd1	uc007gjy.1	chr10	82296695	82360469
RNAP II total and Ser5P	Rps29	uc007nrp.1	chr12	70258711	70260057
RNAP II total and Ser5P	Rabgap1l	uc007deh.1	chr1	162149304	162281702
RNAP II total and Ser5P	Pcf11	uc009iie.1	chr7	99816693	99818399
RNAP II total and Ser5P	Slc2a1	uc008ule.1	chr4	118781372	118809932
RNAP II total and Ser5P	BC010304	uc007qio.1	chr13	48974585	49063197
RNAP II total and Ser5P	Tra2a	uc009bwn.1	chr6	49193919	49214051
RNAP II total and Ser5P	1200004M23Rik	uc008gfn.1	chr19	5850973	5875208
RNAP II total and Ser5P	Tada3l	uc009dfp.1	chr6	113316654	113327514
RNAP II total and Ser5P	Slc2a3	uc009dpq.1	chr6	122677843	122692537
RNAP II total and Ser5P	Rplp1	uc009pzt.1	chr9	61761089	61762317
RNAP II total and Ser5P	Usp48	uc008vjh.1	chr4	137149666	137214452
RNAP II total and Ser5P	Sfrs3	uc008bse.1	chr17	29169617	29180311
RNAP II total and Ser5P	2410002F23Rik	uc009gos.1	chr7	51502095	51507686
RNAP II total and Ser5P	Actb	uc009ajk.1	chr5	143664794	143668403
RNAP II total and Ser5P	AK019083	uc008gfj.1	chr19	5798394	5802671
RNAP II total and Ser5P	Rpl22l1	uc008ouf.1	chr3	28704432	28706337
RNAP II total and Ser5P	3110001K24Rik	uc007tap.1	chr14	35050220	35123689
RNAP II total and Ser5P	Rpl19	uc007lfj.1	chr11	97888270	97891791
RNAP II total and Ser5P	Atp2a2	uc008zli.1	chr5	122903522	122951904
RNAP II total and Ser5P	Hspa9	uc008elv.1	chr18	35097086	35113977
RNAP II total and Ser5P	Trappc6b	uc007npz.1	chr12	60144078	60162448
RNAP II total and Ser5P	B3gnt7	uc007bvk.1	chr1	88200042	88203880
RNAP II total and Ser5P	Rpl14	uc009scr.1	chr9	120480633	120483770
RNAP II total and Ser5P	Midn	uc007gca.1	chr10	79611034	79621112
RNAP II total and Ser5P	Mospd3	uc009ada.1	chr5	138037874	138042268
RNAP II total and Ser5P	Tex2	uc007lzc.1	chr11	106363452	106474244
RNAP II total and Ser5P	Rpl28	uc009eys.1	chr7	4744566	4746149
RNAP II total and Ser5P	EG433182	uc008vxp.1	chr4	149611363	149622984
RNAP II total and Ser5P	Zdhhc20	uc007udu.1	chr14	58482413	58509099
RNAP II total and Ser5P	Rps26	uc007hno.1	chr10	128061591	128063557
RNAP II total and Ser5P	Pycr2	uc007dwv.1	chr1	182834439	182838219
RNAP II total and Ser5P	Atp5h	uc007mhm.1	chr11	115277010	115281233
RNAP II total and Ser5P	Leo1	uc009qsh.1	chr9	75289330	75314239
RNAP II total and Ser5P	Rpl9	uc008xnp.1	chr5	65779603	65782639
RNAP II total and Ser5P	Rps17	uc009ibv.1	chr7	88487618	88490120
RNAP II total and Ser5P	Nxt1	uc008mtf.1	chr2	148498377	148501759
RNAP II total and Ser5P	AK160548	uc007hyu.1	chr11	6425621	6428763
RNAP II total and Ser5P	Gorasp2	uc008jzn.1	chr2	70499632	70527413
RNAP II total and Ser5P	Tmem183a	uc007crq.1	chr1	136242673	136258576
RNAP II total and Ser5P	Zmat2	uc008eos.1	chr18	36953576	36959314
RNAP II total and Ser5P	Mrpl52	uc007tvy.1	chr14	55045745	55045943
RNAP II total and Ser5P	Rps16	uc009fyl.1	chr7	29135768	29137715
RNAP II total and Ser5P	Laptm4a	uc007naf.1	chr12	8928112	8945547
RNAP II total and Ser5P	Rps10	uc008bph.1	chr17	27767373	27772187
RNAP II total and Ser5P	Ankrd54	uc007wsi.1	chr15	78883523	78893289
RNAP II total and Ser5P	AK002390	uc008wqt.1	chr5	23356414	23360742
RNAP II total and Ser5P	Eif1	uc007lkv.1	chr11	100181309	100183410
RNAP II total and Ser5P	U2af1	uc008bvo.1	chr17	31784027	31795660
RNAP II total and Ser5P	Akd2	uc008frm.1	chr18	77801870	77803844
RNAP II total and Ser5P	2310008M10Rik	uc008rjc.1	chr3	130398836	130412336
RNAP II total and Ser5P	KRAZ1	uc008ara.1	chr17	21625951	21668792
RNAP II total and Ser5P	Rpl3	uc007wvb.1	chr15	79908224	79913765
RNAP II total and Ser5P	Rps20	uc008rwn.1	chr4	3761619	3762747
RNAP II total and Ser5P	Josd3	uc009ofp.1	chr9	15110703	15116548
RNAP II total and Ser5P	Egln2	uc009fvb.1	chr7	27949638	27951433
RNAP II total and Ser5P	Ier2	uc009mmr.1	chr8	87183449	87186747
RNAP II total and Ser5P	Rplp2	uc009klf.1	chr7	148633548	148637241
RNAP II total and Ser5P	Rpl12	uc008jhe.1	chr2	32817078	32820016
RNAP II total and Ser5P	AK138253	uc008aeh.1	chr17	3103174	3114795
RNAP II total and Ser5P	Sass6	uc008rcm.1	chr3	116297925	116324520
RNAP II total and Ser5P	Eef1g	uc008goi.1	chr19	9041530	9052670
RNAP II total and Ser5P	Kpna2	uc007lzz.1	chr11	106849942	106860839
RNAP II total and Ser5P	Tmsb10	uc009cjg.1	chr6	72907346	72908393
RNAP II total and Ser5P	Tmem33	uc008xpr.1	chr5	67652087	67660245
RNAP II total and Ser5P	Gbx2	uc007bzb.1	chr1	91824536	91827751
RNAP II total and Ser5P	Lefty1	uc007dww.1	chr1	182865169	182868532
RNAP II total and Ser5P	LOC100042180	uc008uic.1	chr4	116826440	116828737
RNAP II total and Ser5P	Zfp36l1	uc007oal.1	chr12	81208746	81214000
RNAP II total and Ser5P	Hes1	uc007ywl.1	chr16	30065442	30067882
RNAP II total and Ser5P	Tuba1b	uc007xoj.1	chr15	98761861	98764821
RNAP II total and Ser5P	Sfn	uc008vdc.1	chr4	133156470	133158083
RNAP II total and Ser5P	Rps15	uc007gcn.1	chr10	79755201	79756857
RNAP II total and Ser5P	Actg1	uc007msi.1	chr11	120207003	120209798
RNAP II total and Ser5P	Tdgf1	uc009rvg.1	chr9	110842111	110848662
RNAP II total and Ser5P	8430410A17Rik	uc009cuh.1	chr6	87863969	87886607
RNAP II total and Ser5P	Ckb	uc007pdn.1	chr12	112907571	112910479
RNAP II total and Ser5P	Jund1	uc009mbe.1	chr8	73222847	73224515
RNAP II total and Ser5P	Pdik1l	uc008vep.1	chr4	133830920	133843168
RNAP II total and Ser5P	AK019250	uc009kxe.1	chr8	13200729	13207713
RNAP II total and Ser5P	2700094K13Rik	uc008kiv.1	chr2	84509377	84510865
RNAP II total and Ser5P	Gadd45g	uc007qmq.1	chr13	51942063	51943843
RNAP II total and Ser5P	Zic2	uc007vbd.1	chr14	122874605	122879550
RNAP II total and Ser5P	Naprt1	uc007whi.1	chr15	75721393	75724911
RNAP II total and Ser5P	Hnrpf	uc009dle.1	chr6	117856833	117875637
RNAP II total and Ser5P	Mrfap1	uc008xfa.1	chr5	37186105	37187943
RNAP II total and Ser5P	AK040553	uc008znp.1	chr5	123843689	123847939
RNAP II total and Ser5P	Zcchc3	uc008nfj.1	chr2	152238705	152240763
RNAP II total and Ser5P	Acin1	uc007twx.1	chr14	55270553	55305765
RNAP II total and Ser5P	Ran	uc008zsr.1	chr5	129526030	129530196
RNAP II total and Ser5P	Grb7	uc007lgk.1	chr11	98308147	98316687
RNAP II total and Ser5P	Vezf1	uc007kvf.1	chr11	87881842	87898231
RNAP II total and Ser5P	Socs7	uc007lea.1	chr11	97223864	97259856
RNAP II total and Ser5P	BC037520	uc007mmx.1	chr11	116938103	116940269
RNAP II total and Ser5P	Hrbl	uc009adm.1	chr5	138092081	138125921
RNAP II total and Ser5P	2700038C09Rik	uc008oli.1	chr2	180922047	180923209
RNAP II total and Ser5P	E130012A19Rik	uc007leg.1	chr11	97488700	97491030
RNAP II total and Ser5P	Zbtb3	uc008gnb.1	chr19	8876985	8879344
RNAP II total and Ser5P	B930041F14Rik	uc008wei.1	chr4	155068580	155070592
RNAP II total and Ser5P	Rps4x	uc009tym.1	chrX	99380281	99384662
RNAP II total and Ser5P	Rpl21	uc009ank.1	chr5	147644720	147648606
RNAP II total and Ser5P	Rpl7	uc007ajl.1	chr1	16091378	16094488
RNAP II total and Ser5P	Fhl3	uc008uqv.1	chr4	124377953	124385855
RNAP II total and Ser5P	Tgif1	uc008dlp.1	chr17	71193556	71200538
RNAP II total and Ser5P	AK085477	uc007krk.1	chr11	85048667	85051804
RNAP II total and Ser5P	Denr	uc008zor.1	chr5	124357283	124378841
RNAP II total and Ser5P	Ube2c	uc008nvy.1	chr2	164595428	164598402
RNAP II total and Ser5P	Osbpl8	uc007gzy.1	chr10	110601857	110734303
RNAP II total and Ser5P	Rpl23	uc007lev.1	chr11	97642647	97643571
RNAP II total and Ser5P	Tsc22d4	uc009adu.1	chr5	138187223	138200975
RNAP II total and Ser5P	Hmgn2	uc008vdq.1	chr4	133520653	133523906
RNAP II total and Ser5P	Rasa2	uc009rcn.1	chr9	96439718	96531922
RNAP II total and Ser5P	Banf1	uc008gcr.1	chr19	5364639	5366347
RNAP II total and Ser5P	Rpl7l1	uc008cuk.1	chr17	46914466	46919605
RNAP II total and Ser5P	Serpinb6a	uc007qaq.1	chr13	34015492	34027865
RNAP II total and Ser5P	Eif5	uc007pdd.1	chr12	112776311	112784824
RNAP II total and Ser5P	Cyp4f13	uc008bxt.1	chr17	33061632	33084306
RNAP II total and Ser5P	Clec11a	uc009gpb.1	chr7	51559623	51562264
RNAP II total and Ser5P	Kctd11	uc007jsd.1	chr11	69691178	69694908
RNAP II total and Ser5P	1810055G02Rik	uc008fwt.1	chr19	3708332	3717881
RNAP II total and Ser5P	AK019124	uc008gzy.1	chr19	23209389	23210198
RNAP II total and Ser5P	AK019514	uc008bvg.1	chr17	31694070	31696055
no Peak	0610037P05Rik	uc007yhh.1	chr16	14299336	14317425
no Peak	0610038F07Rik	uc008gpv.1	chr19	10587981	10599699
no Peak	1110001J03Rik	uc009bki.1	chr6	38484860	38489449
no Peak	1110003E01Rik	uc008xnt.1	chr5	65839993	65884074
no Peak	1110004F10Rik	uc009jiw.1	chr7	123236854	123248724
no Peak	1110005A23Rik	uc007hoq.1	chr10	128258974	128285366
no Peak	1110007C09Rik	uc007qiy.1	chr13	49298319	49311395
no Peak	1110007M04Rik	uc008sed.1	chr4	24825247	24832148
no Peak	1110008F13Rik	uc008nob.1	chr2	156688863	156692723
no Peak	1110012M11Rik	uc009mds.1	chr8	74066828	74068387
no Peak	1110013L07Rik	uc008pxy.1	chr3	88987146	88993211
no Peak	1110019N10Rik	uc009nba.1	chr8	107163738	107165628
no Peak	1110031B06Rik	uc007jds.1	chr11	59220651	59263458
no Peak	1110034B05Rik	uc007baz.1	chr1	57445087	57463279
no Peak	1110038D17Rik	uc007fqi.1	chr10	74813855	74980067
no Peak	1110057K04Rik	uc007mzg.1	chr12	8214930	8283016
no Peak	1110059E24Rik	uc008gyz.1	chr19	21671802	21727281
no Peak	1190002N15Rik	uc009rax.1	chr9	94418282	94438500
no Peak	1190005F20Rik	uc007cyw.1	chr1	153275835	153305289
no Peak	1190005I06Rik	uc009nre.1	chr8	123132501	123158282
no Peak	1200004M23Rik	uc008gfp.1	chr19	5874770	5875208
no Peak	1200011M11Rik	uc007ktg.1	chr11	86891233	86900279
no Peak	1200014J11Rik	uc007jzv.1	chr11	72861381	72893718
no Peak	1300003B13Rik	uc008art.1	chr17	22561234	22593656
no Peak	1300014I06Rik	uc007qbj.1	chr13	34719709	34744550
no Peak	1500001M20Rik	uc009dij.1	chr6	114954398	114987892
no Peak	1500002O20Rik	uc009fpm.1	chr7	25184646	25193292
no Peak	1600021P15Rik	uc007yvv.1	chr16	28826261	28929784
no Peak	1700007K13Rik	uc008iyf.1	chr2	28317520	28321844
no Peak	1700012H17Rik	uc008rxg.1	chr4	5571325	6035369
no Peak	1700025G04Rik	uc007czd.1	chr1	153699532	153937229
no Peak	1700041B20Rik	uc008mew.1	chr2	126966144	126969178
no Peak	1700052N19Rik	uc007ehb.1	chr10	5906071	5913936
no Peak	1700065O13Rik	uc008bxy.1	chr17	33153808	33170326
no Peak	1810012P15Rik	uc007kkb.1	chr11	78640096	78660372
no Peak	1810030N24Rik	uc008sgm.1	chr4	34715920	34725608
no Peak	1810044A24Rik	uc007wbn.1	chr15	72629953	72891634
no Peak	1810048J11Rik	uc007nvr.1	chr12	73637343	73681200
no Peak	1810049H13Rik	uc007mst.1	chr11	120317917	120319377
no Peak	1810054D07Rik	uc008tkr.1	chr4	82885721	82970093
no Peak	1810063B07Rik	uc007siy.1	chr14	20894881	20902348
no Peak	1810073G14Rik	uc007izu.1	chr11	57296501	57332117
no Peak	1810073N04Rik	uc007mrz.1	chr11	119980185	120012588
no Peak	2010002N04Rik	uc008fag.1	chr18	60633844	60661637
no Peak	2010012C16Rik	uc009eiq.1	chr6	131234406	131243262
no Peak	2010208K18Rik	uc009kcm.1	chr7	140019143	140044330
no Peak	2010311D03Rik	uc008jqc.1	chr2	50135400	50152197
no Peak	2210009G21Rik	uc008mou.1	chr2	136716953	136895514
no Peak	2210018M11Rik	uc009ikr.1	chr7	105751092	105805079
no Peak	2210412D01Rik	uc009ied.1	chr7	91257868	91300403
no Peak	2310003L22Rik	uc008mpo.1	chr2	139996514	140029368
no Peak	2310009B15Rik	uc007cvw.1	chr1	140748555	140753431
no Peak	2310009E04Rik	uc008tsw.1	chr4	95224201	95593626
no Peak	2310022A10Rik	uc009fwo.1	chr7	28338329	28366196
no Peak	2310030N02Rik	uc008ryy.1	chr4	10998539	11003351
no Peak	2310035C23Rik	uc007cgj.1	chr1	107560489	107633821
no Peak	2310047O13Rik	uc008ijn.1	chr2	12268890	12341087
no Peak	2310057M21Rik	uc009kbg.1	chr7	138486231	138506212
no Peak	2310079F23Rik	uc008xdv.1	chr5	35915144	35917709
no Peak	2410004B18Rik	uc008rqt.1	chr3	145600995	145607239
no Peak	2410004L22Rik	uc009mcg.1	chr8	73775023	73796275
no Peak	2410008K03Rik	uc007hur.1	chr11	4118253	4122412
no Peak	2410017P07Rik	uc007eyb.1	chr10	41438651	41529674
no Peak	2410018C17Rik	uc008xat.1	chr5	33943001	33972004
no Peak	2410127L17Rik	uc008gxv.1	chr19	18745269	18779282
no Peak	2410187C16Rik	uc007vti.1	chr15	57972990	57990209
no Peak	2510039O18Rik	uc008vtm.1	chr4	147315003	147321423
no Peak	2510048L02Rik	uc009omy.1	chr9	21732055	21734449
no Peak	2600009E05Rik	uc008mjs.1	chr2	130479818	130490381
no Peak	2610024G14Rik	uc008xwd.1	chr5	77734004	77739083
no Peak	2610028A01Rik	uc007uhx.1	chr14	64479200	64538641
no Peak	2610039C10Rik	uc007zwj.1	chr16	90719556	90727616
no Peak	2610209M04Rik	uc009csj.1	chr6	86625162	86634485
no Peak	2610301B20Rik	uc008ryv.1	chr4	10801754	10826570
no Peak	2610304G08Rik	uc008npl.1	chr2	157854529	157874446
no Peak	2610528J11Rik	uc008ukj.1	chr4	118199879	118202822
no Peak	2610528K11Rik	uc008jib.1	chr2	33585475	33743466
no Peak	2610529C04Rik	uc009ubh.1	chrX	103165555	103207125
no Peak	2700007P21Rik	uc008lls.1	chr2	106807863	106814554
no Peak	2700019D07Rik	uc007eum.1	chr10	33646741	33671018
no Peak	2700049A03Rik	uc007nun.1	chr12	72237834	72344286
no Peak	2810002O09Rik	uc009ttx.1	chrX	92615656	92640163
no Peak	2810025M15Rik	uc007ddi.1	chr1	159342482	159350367
no Peak	2810055F11Rik	uc007nve.1	chr12	73177482	73186300
no Peak	2810426N06Rik	uc009glt.1	chr7	48888900	48906902
no Peak	2810474O19Rik	uc009eub.1	chr6	149257952	149278306
no Peak	2900026A02Rik	uc008yua.1	chr5	113517969	113592311
no Peak	2900064A13Rik	uc008lpb.1	chr2	112295181	112307593
no Peak	3110001A13Rik	uc008iek.1	chr2	3630729	3699406
no Peak	3110001I20Rik	uc008mcz.1	chr2	125562721	125608606
no Peak	3110003A17Rik	uc007ely.1	chr10	17731066	17743058
no Peak	3110003A22Rik	uc008rxj.1	chr4	6118251	6146935
no Peak	3110005G23Rik	uc009lvb.1	chr8	67471083	67492932
no Peak	3110050N22Rik	uc008oog.1	chr3	7503425	7553848
no Peak	3930401K13Rik	uc007ybo.1	chr16	5047826	5049502
no Peak	4631426J05Rik	uc009kby.1	chr7	139427937	139508838
no Peak	4631427C17Rik	uc009beh.1	chr6	29718532	29833729
no Peak	4632404H22Rik	uc009tev.1	chrX	50596610	50622208
no Peak	4732418C07Rik	uc008uff.1	chr4	115410677	115446956
no Peak	4833420G17Rik	uc007rzg.1	chr13	120251642	120258968
no Peak	4921505C17Rik	uc007vdr.1	chr15	6658382	6750387
no Peak	4921506J03Rik	uc007has.1	chr10	112362483	112366082
no Peak	4921513D23Rik	uc007ygx.1	chr16	14141056	14163444
no Peak	4921517L17Rik	uc008nnd.1	chr2	156138327	156201374
no Peak	4921517N04Rik	uc008ioi.1	chr2	23365573	23427574
no Peak	4921524J17Rik	uc009mpv.1	chr8	87932657	87956730
no Peak	4921533L14Rik	uc007amm.1	chr1	24035038	24107172
no Peak	4930402H24Rik	uc008mjy.1	chr2	130574186	130665846
no Peak	4930432O21Rik	uc008arm.1	chr17	22099724	22131330
no Peak	4930444A02Rik	uc009lhh.1	chr8	27091075	27104593
no Peak	4930471M23Rik	uc008wvs.1	chr5	30950335	30962102
no Peak	4930473A06Rik	uc008tlc.1	chr4	83171448	83510574
no Peak	4930503L19Rik	uc008fod.1	chr18	70612793	70632134
no Peak	4930535B03Rik	uc008qlb.1	chr3	95576175	95622876
no Peak	4930558O21Rik	uc008ovc.1	chr3	30543428	30571353
no Peak	4930579G22Rik	uc008ztp.1	chr5	130384409	130387150
no Peak	4931406P16Rik	uc009gjb.1	chr7	35068976	35098566
no Peak	4932417H02Rik	uc007mqy.1	chr11	119464308	119706353
no Peak	4932432K03Rik	uc007tjz.1	chr14	49686223	49707398
no Peak	4933406E20Rik	uc009rqm.1	chr9	108485323	108499931
no Peak	4933425L03Rik	uc007nbi.1	chr12	13275938	13324548
no Peak	4933432B09Rik	uc007wtx.1	chr15	79442746	79451285
no Peak	5033414K04Rik	uc007bst.1	chr1	84032875	84281166
no Peak	5730437N04Rik	uc008afa.1	chr17	5410863	5440260
no Peak	5730446C15Rik	uc008gza.1	chr19	21727798	21753272
no Peak	5730455P16Rik	uc007klv.1	chr11	80174700	80191498
no Peak	5730536A07Rik	uc009qel.1	chr9	65974417	65986775
no Peak	5730557B15Rik	uc007vke.1	chr15	31226418	31297320
no Peak	5830433M19Rik	uc008tsa.1	chr4	94166771	94223475
no Peak	5830483C08Rik	uc007nav.1	chr12	11247731	11272593
no Peak	6030458C11Rik	uc007vhz.1	chr15	12750774	12754396
no Peak	6230424H07Rik	uc007fdf.1	chr10	57960695	58038989
no Peak	6330408A02Rik	uc009ffl.1	chr7	13844315	13864070
no Peak	6330416L07Rik	uc008arq.1	chr17	22476253	22498361
no Peak	6330569M22Rik	uc008qxh.1	chr3	107423369	107434593
no Peak	6430514L14Rik	uc009qnu.1	chr9	69937116	69989364
no Peak	6430598A04Rik	uc009adr.1	chr5	138172190	138182835
no Peak	6530401N04Rik	uc007nne.1	chr12	53098493	53107488
no Peak	6530403A03Rik	uc007qdn.1	chr13	38296807	38307457
no Peak	6720456H20Rik	uc007tjk.1	chr14	49065802	49134805
no Peak	8030462N17Rik	uc008fro.1	chr18	77872019	77953225
no Peak	8430410K20Rik	uc009obm.1	chr9	4376561	4386869
no Peak	9030624J02Rik	uc009jkm.1	chr7	125884254	125891479
no Peak	9130008F23Rik	uc008com.1	chr17	41012430	41017501
no Peak	9130011E15Rik	uc008hrw.1	chr19	45992933	46072978
no Peak	9430016H08Rik	uc007bbc.1	chr1	57463171	57474796
no Peak	9430067K14Rik	uc007bha.1	chr1	64835694	65003398
no Peak	9630008K15Rik	uc008wtw.1	chr5	28528985	28572328
no Peak	9630014M24Rik	uc008esm.1	chr18	38761187	38805576
no Peak	9630058J23Rik	uc007dvo.1	chr1	181476659	181557604
no Peak	A230051G13Rik	uc007jdd.1	chr11	58968870	58977244
no Peak	A230054D04Rik	uc008xhg.1	chr5	42213753	42235554
no Peak	A230067G21Rik	uc008msm.1	chr2	146245814	146337740
no Peak	A230083G16Rik	uc009dsn.1	chr6	124866880	124875862
no Peak	A230107C01Rik	uc009gbe.1	chr7	29981768	29996514
no Peak	A330102K23Rik	uc008jwq.1	chr2	65683898	65861516
no Peak	A430041B07Rik	uc007nqt.1	chr12	66066790	66123560
no Peak	A530054K11Rik	uc007rbh.1	chr13	67717937	67738690
no Peak	A630012P03Rik	uc009tei.1	chrX	49929019	49972224
no Peak	A630042L21Rik	uc008fbs.1	chr18	61308946	61336704
no Peak	A630055G03Rik	uc007yel.1	chr16	10835180	10893059
no Peak	A630072M18Rik	uc008wog.1	chr5	20457035	20460003
no Peak	A730011L01Rik	uc007mqt.1	chr11	119352660	119372736
no Peak	A830080D01Rik	uc009usr.1	chrX	155970599	156031013
no Peak	A930008G19Rik	uc009kcj.1	chr7	139903766	140005569
no Peak	A930016P21Rik	uc007vkl.1	chr15	31531870	31547290
no Peak	A930041I02Rik	uc008jog.1	chr2	38935563	39046250
no Peak	AA881470	uc009aia.1	chr5	141180976	141191889
no Peak	Aacs	uc008zrs.1	chr5	125956242	125997773
no Peak	Aak1	uc009csr.1	chr6	86799510	86901013
no Peak	Aasdhppt	uc009obi.1	chr9	4295092	4309471
no Peak	Aatf	uc007kqn.1	chr11	84280406	84327003
no Peak	Abcb7	uc009uaf.1	chrX	101478958	101609182
no Peak	Abcc5	uc007yps.1	chr16	20400832	20426467
no Peak	Abcd1	uc009tmk.1	chrX	70961935	70976771
no Peak	Abcd3	uc008reg.1	chr3	121461827	121518133
no Peak	Abcg1	uc008buj.1	chr17	31194685	31252719
no Peak	Abcg2	uc009cdc.1	chr6	58590539	58614759
no Peak	Abhd2	uc009hyc.1	chr7	86418151	86506487
no Peak	Abr	uc007kfv.1	chr11	76269110	76308958
no Peak	Acaca	uc007kqk.1	chr11	83986819	84047310
no Peak	Acad8	uc009opy.1	chr9	26781725	26807134
no Peak	Acad9	uc008oze.1	chr3	35964921	35991779
no Peak	Acbd6	uc007dbj.1	chr1	157405251	157534362
no Peak	Acly	uc007llm.1	chr11	100337669	100389215
no Peak	Aco1	uc008shd.1	chr4	40090297	40146042
no Peak	Acot9	uc009urt.1	chrX	151697042	151732050
no Peak	Acsl3	uc007bqo.1	chr1	78654448	78703562
no Peak	Actn2	uc007pli.1	chr13	12361693	12432999
no Peak	Actr5	uc008nql.1	chr2	158450648	158454893
no Peak	Adamts10	uc008bym.1	chr17	33661168	33667921
no Peak	Adamts4	uc007dnn.1	chr1	173180552	173190053
no Peak	Adarb1	uc007fvl.1	chr10	76753477	76881018
no Peak	Adc	uc008uvp.1	chr4	128607476	128639661
no Peak	Adcy1	uc007hzf.1	chr11	6963491	7078508
no Peak	Adfp	uc008tlz.1	chr4	86302468	86315963
no Peak	Adi1	uc007nfv.1	chr12	29360071	29367039
no Peak	Adipor2	uc009dmf.1	chr6	119307703	119367501
no Peak	Adk	uc007slc.1	chr14	21871854	22138884
no Peak	Adrb2	uc008fcy.1	chr18	62337469	62339613
no Peak	Aebp2	uc009eol.1	chr6	140573429	140601347
no Peak	Aes	uc007gim.1	chr10	81022304	81029109
no Peak	Afap1	uc008xej.1	chr5	36235967	36346571
no Peak	Aff1	uc008yjs.1	chr5	104121438	104245447
no Peak	Aff3	uc007asu.1	chr1	38266397	38684089
no Peak	Afg3l2	uc008fmh.1	chr18	67593504	67608790
no Peak	Aftph	uc007idi.1	chr11	20608627	20641487
no Peak	Aggf1	uc007rmj.1	chr13	96123456	96145289
no Peak	Agk	uc009bmn.1	chr6	40275493	40346761
no Peak	Agps	uc008kes.1	chr2	75670248	75733235
no Peak	Ahcyl1	uc008qxj.1	chr3	107466037	107499466
no Peak	Ahnak	uc008gol.1	chr19	9063773	9151409
no Peak	Ahr	uc007nji.1	chr12	36182650	36219661
no Peak	AI314180	uc008sze.1	chr4	58812902	58925597
no Peak	AI450948	uc007pff.1	chr12	114023208	114040868
no Peak	AI480653	uc007yxa.1	chr16	30955715	31081466
no Peak	AI597479	uc007avj.1	chr1	43155554	43172791
no Peak	AI661453	uc008cvf.1	chr17	47573587	47602833
no Peak	AI846148	uc008gkv.1	chr19	7432179	7457316
no Peak	AI847670	uc008won.1	chr5	20930881	20940412
no Peak	AI848100	uc007dfu.1	chr1	163768884	163806729
no Peak	AI931714	uc009mhp.1	chr8	80073295	80087877
no Peak	Aifm1	uc009tch.1	chrX	45828120	45866603
no Peak	AK002929	uc008tvm.1	chr4	101026387	101071790
no Peak	AK005115	uc009kct.1	chr7	140081171	140123050
no Peak	AK005839	uc008qyp.1	chr3	108051828	108059903
no Peak	AK006461	uc007gjx.1	chr10	82274867	82286987
no Peak	AK007210	uc007xpe.1	chr15	99082218	99092473
no Peak	AK007436	uc009czf.1	chr6	92876224	92893472
no Peak	AK010767	uc008sgr.1	chr4	34857037	34858791
no Peak	AK012135	uc008edk.1	chr18	14941753	14963233
no Peak	AK012387	uc009elc.1	chr6	134879109	134901588
no Peak	AK013046	uc007bgw.1	chr1	64726444	64737233
no Peak	AK013191	uc007pis.1	chr13	3477500	3497843
no Peak	AK014660	uc007eqv.1	chr10	24309110	24315618
no Peak	AK014798	uc008awd.1	chr17	24602402	24607258
no Peak	AK014981	uc008dcq.1	chr17	56767565	56774017
no Peak	AK015136	uc007gvv.1	chr10	94136456	94151319
no Peak	AK015179	uc009qyu.1	chr9	88442857	88463688
no Peak	AK016085	uc008jyx.1	chr2	69723784	69726212
no Peak	AK016511	uc007ugw.1	chr14	63379337	63448963
no Peak	AK016661	uc008rew.1	chr3	122567647	122627034
no Peak	AK016898	uc007izz.1	chr11	57437199	57462563
no Peak	AK017143	uc008wpw.1	chr5	22888125	22939154
no Peak	AK017220	uc007itn.1	chr11	51003334	51033915
no Peak	AK017586	uc007gwh.1	chr10	94880008	94891274
no Peak	AK018940	uc008ods.1	chr2	173116755	173117097
no Peak	AK020054	uc007nea.1	chr12	21816736	21840423
no Peak	AK020087	uc008dzh.1	chr18	6240811	6268385
no Peak	AK020502	uc007qlx.1	chr13	51193740	51196085
no Peak	AK021127	uc007kvt.1	chr11	88579958	88589886
no Peak	AK021325	uc007ecf.1	chr1	193048352	193049565
no Peak	AK021368	uc008tvl.1	chr4	101019135	101028814
no Peak	AK029878	uc008dvs.1	chr17	89025948	89061926
no Peak	AK030946	uc009tdn.1	chrX	47908921	47988435
no Peak	AK031485	uc008gpl.1	chr19	10300507	10315238
no Peak	AK035732	uc007wuq.1	chr15	79720125	79723550
no Peak	AK035742	uc007xin.1	chr15	92174789	92208534
no Peak	AK038885	uc009uoz.1	chrX	147726516	147779389
no Peak	AK039403	uc008gue.1	chr19	12592404	12671056
no Peak	AK039720	uc009ddk.1	chr6	108527032	108610928
no Peak	AK040659	uc009kgg.1	chr7	147136294	147149226
no Peak	AK040674	uc008oai.1	chr2	167516676	167554672
no Peak	AK041972	uc009mio.1	chr8	81819021	81831584
no Peak	AK043789	uc007age.1	chr1	7339486	7387950
no Peak	AK045413	uc007gjp.1	chr10	82082600	82085834
no Peak	AK045643	uc008iab.1	chr19	57397682	57435265
no Peak	AK049111	uc007vme.1	chr15	35301300	35369226
no Peak	AK050735	uc007zwn.1	chr16	90783387	90810637
no Peak	AK050866	uc007yeo.1	chr16	11008990	11015277
no Peak	AK076372	uc009fso.1	chr7	26161837	26224555
no Peak	AK076672	uc009qwk.1	chr9	83325153	83348180
no Peak	AK076687	uc008ihs.1	chr2	10260909	10295668
no Peak	AK079754	uc007slu.1	chr14	22666799	22676148
no Peak	AK080030	uc008prd.1	chr3	85946678	85949467
no Peak	AK082086	uc009ape.1	chr5	149931140	149995639
no Peak	AK082200	uc009ewv.1	chr7	4025726	4072330
no Peak	AK082857	uc009odp.1	chr9	9011237	9239101
no Peak	AK085995	uc007fgb.1	chr10	60937421	60939429
no Peak	AK088897	uc009lat.1	chr8	19784732	19788986
no Peak	AK090048	uc007vym.1	chr15	61869541	62208396
no Peak	AK129128	uc007rgk.1	chr13	76236181	76325431
no Peak	AK135487	uc009lau.1	chr8	19863863	19893020
no Peak	AK136409	uc008ove.1	chr3	30581601	30598744
no Peak	AK136817	uc009izj.1	chr7	112911254	113012164
no Peak	AK136919	uc007ruh.1	chr13	107822855	107845577
no Peak	AK137251	uc007gjk.1	chr10	81590757	81615736
no Peak	AK137536	uc009dnn.1	chr6	120616386	120674938
no Peak	AK138792	uc008ypk.1	chr5	110198425	110225317
no Peak	AK139295	uc008shs.1	chr4	40667186	40669431
no Peak	AK139523	uc008ali.1	chr17	13093028	13102751
no Peak	AK140192	uc007jgt.1	chr11	60692619	60700720
no Peak	AK141411	uc008nws.1	chr2	164736853	164745453
no Peak	AK143784	uc008qnb.1	chr3	96359690	96370724
no Peak	AK143934	uc009odq.1	chr9	9236287	9260883
no Peak	AK144545	uc007ric.1	chr13	81917771	81922768
no Peak	AK144927	uc008mgo.1	chr2	128124398	128255085
no Peak	AK146156	uc008irn.1	chr2	25182969	25188091
no Peak	AK147860	uc009mzf.1	chr8	98330729	98345628
no Peak	AK155239	uc007leh.1	chr11	97506172	97521681
no Peak	AK157499	uc007zlq.1	chr16	55843317	55895398
no Peak	AK158300	uc007usk.1	chr14	78913505	78936587
no Peak	AK160850	uc008ekc.1	chr18	34367428	34381426
no Peak	AK161769	uc008ckj.1	chr17	36278693	36282689
no Peak	AK163097	uc009tqg.1	chrX	72952270	73010038
no Peak	AK165338	uc007ywi.1	chr16	29907604	29946603
no Peak	AK166079	uc008jtw.1	chr2	60044182	60047896
no Peak	AK166773	uc008ofk.1	chr2	174957386	174967500
no Peak	AK188320	uc008imj.1	chr2	19580472	19581174
no Peak	Akap10	uc007jik.1	chr11	61705278	61743728
no Peak	Akap13	uc009hwo.1	chr7	82600442	82748187
no Peak	Akap7	uc007eri.1	chr10	24888895	25018969
no Peak	Akap9	uc008wic.1	chr5	3928185	3962457
no Peak	Akr7a5	uc008vmc.1	chr4	138866658	138874340
no Peak	Alas1	uc009rjj.1	chr9	106136259	106150187
no Peak	Aldh18a1	uc008hky.1	chr19	40631546	40662859
no Peak	Aldh1b1	uc008ssx.1	chr4	45811893	45817480
no Peak	Alg10b	uc007xhk.1	chr15	90054741	90060985
no Peak	Alg5	uc008pfr.1	chr3	54539460	54543660
no Peak	Ammecr1	uc009umc.1	chrX	139288016	139401271
no Peak	Amotl1	uc009oeq.1	chr9	14346410	14447973
no Peak	Ampd2	uc008qyb.1	chr3	107880249	107888317
no Peak	Anapc10	uc009miv.1	chr8	82235718	82301220
no Peak	Anapc1	uc008mgr.1	chr2	128467812	128513116
no Peak	Anapc4	uc008xkx.1	chr5	53225373	53257973
no Peak	Angel2	uc007ebl.1	chr1	192752423	192762314
no Peak	Angptl4	uc008bzp.1	chr17	33911844	33918451
no Peak	Ank2	uc008rgv.1	chr3	126650029	127111949
no Peak	Ankhd1	uc008enr.1	chr18	36720399	36794459
no Peak	Ankmy2	uc007njs.1	chr12	36883776	36914802
no Peak	Ankra2	uc007rot.1	chr13	99033196	99044709
no Peak	Ankrd12	uc008dgs.1	chr17	66316840	66426386
no Peak	Ankrd28	uc007sya.1	chr14	32513200	32643601
no Peak	Ankrd46	uc007vmt.1	chr15	36407422	36426506
no Peak	Ankrd54	uc007wsj.1	chr15	78890050	78893289
no Peak	Anks3	uc007ybe.1	chr16	4957733	4964277
no Peak	Anxa2	uc009qng.1	chr9	69301489	69339592
no Peak	Anxa3	uc008yfm.1	chr5	97222433	97274987
no Peak	Anxa6	uc007iyt.1	chr11	54804467	54846916
no Peak	Anxa7	uc007sju.1	chr14	21278013	21299038
no Peak	Ap1s3	uc007bqt.1	chr1	79603456	79668538
no Peak	Ap2b1	uc007kos.1	chr11	83116198	83212099
no Peak	Ap4e1	uc008mem.1	chr2	126834446	126870560
no Peak	Ap4s1	uc007nmw.1	chr12	52792023	52839920
no Peak	Apc	uc008ekf.1	chr18	34407347	34449999
no Peak	Apitd1	uc008vvu.1	chr4	148505463	148511659
no Peak	Appl1	uc007sth.1	chr14	27732173	27783737
no Peak	Appl2	uc007gkk.1	chr10	83062778	83111409
no Peak	Aqr	uc008lqe.1	chr2	113930933	114001055
no Peak	Araf	uc009stt.1	chrX	20425723	20432636
no Peak	Arcn1	uc009pej.1	chr9	44563657	44575891
no Peak	Arhgap10	uc009mhm.1	chr8	79774264	80041806
no Peak	Arhgap12	uc008dzc.1	chr18	6024447	6136096
no Peak	Arhgap19	uc008hmh.1	chr19	41844074	41876524
no Peak	Arhgap21	uc008imz.1	chr2	20769545	20889348
no Peak	Arhgap5	uc007nnj.1	chr12	53604958	53646626
no Peak	Arhgef10	uc009kzg.1	chr8	14911716	15001085
no Peak	Arhgef15	uc007jol.1	chr11	68756655	68770360
no Peak	Arhgef7	uc009kvv.1	chr8	11728168	11827148
no Peak	Arid1b	uc008aez.1	chr17	5040579	5127640
no Peak	Arid3b	uc009pvt.1	chr9	57638315	57682039
no Peak	Arid4a	uc007nud.1	chr12	72116953	72200338
no Peak	Arid4b	uc007pmy.1	chr13	14156058	14257949
no Peak	Arl13b	uc007zpu.1	chr16	62793514	62846823
no Peak	Arl3	uc008htt.1	chr19	46605598	46647575
no Peak	Arl4a	uc007nkr.1	chr12	40732033	40763963
no Peak	Arl5b	uc008iky.1	chr2	14976988	15000818
no Peak	Arl6ip2	uc008dqh.1	chr17	80272740	80295463
no Peak	Armc8	uc009reg.1	chr9	99418663	99469318
no Peak	Armc9	uc007bvg.1	chr1	88051354	88174859
no Peak	Arpc3	uc008zlf.1	chr5	122841936	122856187
no Peak	Arrb2	uc007jut.1	chr11	70246154	70254330
no Peak	Arrdc4	uc009hjh.1	chr7	75881879	75894124
no Peak	Arsa	uc007xgy.1	chr15	89302926	89307856
no Peak	Ascc1	uc007feh.1	chr10	59465586	59562734
no Peak	Ash1l	uc008pxi.1	chr3	88754285	88789712
no Peak	Aste1	uc009rid.1	chr9	105297851	105307791
no Peak	Astn2	uc008thn.1	chr4	65041836	66065517
no Peak	Atad2b	uc007myu.1	chr12	4924158	5054216
no Peak	Ate1	uc009kac.1	chr7	137535007	137663475
no Peak	Atf2	uc008kdj.1	chr2	73664415	73730685
no Peak	Atf5	uc009gqu.1	chr7	52067627	52071028
no Peak	Atf7ip2	uc007ydi.1	chr16	10193014	10243144
no Peak	Atf7	uc007xwn.1	chr15	102364007	102455852
no Peak	Atg2b	uc007oyq.1	chr12	106897473	106923451
no Peak	Atg4c	uc008tuu.1	chr4	98860624	98926478
no Peak	Atg5	uc007ezt.1	chr10	43988163	44084097
no Peak	Atp10a	uc009hef.1	chr7	65913701	66084161
no Peak	Atp11a	uc009kwh.1	chr8	12757015	12868728
no Peak	Atp11b	uc008oyt.1	chr3	35653059	35755198
no Peak	Atp13a2	uc008vnm.1	chr4	140542842	140554077
no Peak	Atp2c1	uc009rii.1	chr9	105325097	105397429
no Peak	Atp6ap2	uc009sqx.1	chrX	12164995	12194091
no Peak	Atp6v0e	uc008beh.1	chr17	26813340	26834896
no Peak	Atp6v1a	uc007zgu.1	chr16	44085516	44139132
no Peak	Atp6v1b2	uc009lww.1	chr8	71612682	71631262
no Peak	Atp6v1c1	uc007vnv.1	chr15	38591708	38621638
no Peak	Atp6v1h	uc007afn.1	chr1	5073253	5152630
no Peak	Atp7a	uc009ubm.1	chrX	103222655	103320256
no Peak	Atp9a	uc008obd.1	chr2	168459937	168567631
no Peak	Atpaf1	uc008ufj.1	chr4	115457588	115484919
no Peak	Atpbd1c	uc008zle.1	chr5	122822516	122832778
no Peak	Atrnl1	uc008iai.1	chr19	57685534	58207830
no Peak	Atrx	uc009ubg.1	chrX	103077296	103123916
no Peak	Atxn3	uc007otw.1	chr12	103171135	103196392
no Peak	AU014645	uc008stj.1	chr4	46151382	46172971
no Peak	AU022252	uc008uln.1	chr4	118894526	118905311
no Peak	Auh	uc007qnd.1	chr13	52930478	53025046
no Peak	Auts2	uc008zuw.1	chr5	132244280	133018213
no Peak	AW146154	uc009glr.1	chr7	48745216	48755260
no Peak	Axin2	uc007mbu.1	chr11	108781679	108812095
no Peak	AY078069	uc009gei.1	chr7	31206750	31213765
no Peak	B230120H23Rik	uc008kbv.1	chr2	72123833	72280667
no Peak	B230339M05Rik	uc008nqg.1	chr2	158235588	158265382
no Peak	B3bp	uc008xoa.1	chr5	66154759	66218023
no Peak	B3galnt2	uc007pmm.1	chr13	14046940	14069556
no Peak	B3galtl	uc009aqc.1	chr5	150480831	150565174
no Peak	B3gnt5	uc007ypd.1	chr16	19760326	19772393
no Peak	B4galnt4	uc009kje.1	chr7	148247172	148258018
no Peak	B630005N14Rik	uc009ayp.1	chr6	13575936	13627966
no Peak	Bach1	uc007zup.1	chr16	87699198	87723165
no Peak	Bach2	uc008ser.1	chr4	32325924	32668174
no Peak	Bambi	uc008dyc.1	chr18	3507954	3516402
no Peak	Banp	uc009nsg.1	chr8	124474446	124549969
no Peak	Bat5	uc008cfq.1	chr17	35226235	35239932
no Peak	Baz2a	uc007hlk.1	chr10	127533431	127556556
no Peak	Baz2b	uc008jts.1	chr2	59751596	59963867
no Peak	Bbs12	uc008pao.1	chr3	37211475	37220373
no Peak	Bbs9	uc009oos.1	chr9	22280158	22692724
no Peak	Bbx	uc007zko.1	chr16	50197274	50432494
no Peak	BC003331	uc007cxz.1	chr1	152208440	152240185
no Peak	BC003993	uc008kgi.1	chr2	77760127	77784240
no Peak	BC012278	uc007rfh.1	chr13	74617504	74631398
no Peak	BC013481	uc008xoo.1	chr5	66409884	66543146
no Peak	BC018371	uc007kzc.1	chr11	94418415	94463100
no Peak	BC020002	uc009axk.1	chr6	8159228	8186273
no Peak	BC020449	uc007qtr.1	chr13	58482752	58486586
no Peak	BC021395	uc008egu.1	chr18	24643462	24688705
no Peak	BC021611	uc009nts.1	chr8	125299404	125338326
no Peak	BC023744	uc008zfn.1	chr5	117769274	117789057
no Peak	BC025054	uc007pyi.1	chr13	28551902	28975446
no Peak	BC025076	uc007jjr.1	chr11	62462165	62479861
no Peak	BC027344	uc009gcf.1	chr7	30618638	30638667
no Peak	BC030336	uc009jmx.1	chr7	127821259	127874766
no Peak	BC031441	uc008dai.1	chr17	56077797	56088923
no Peak	BC031503	uc007ncz.1	chr12	17888711	17946438
no Peak	BC037393	uc009aug.1	chr5	151450786	151468152
no Peak	BC039093	uc008uvn.1	chr4	128450328	128483356
no Peak	BC043476	uc008arh.1	chr17	21870690	21906309
no Peak	BC049806	uc007bcj.1	chr1	58584092	58643085
no Peak	BC050210	uc007aqv.1	chr1	36656818	36739931
no Peak	BC052040	uc008lqr.1	chr2	115407511	115604504
no Peak	BC053977	uc008ffj.1	chr18	66022993	66054409
no Peak	BC057893	uc008sti.1	chr4	46136276	46151347
no Peak	BC062115	uc007gjj.1	chr10	81510871	81524331
no Peak	BC062254	uc008fvw.1	chr18	90749216	90758976
no Peak	BC067010	uc007mxq.1	chr12	4234062	4240123
no Peak	BC068281	uc007mym.1	chr12	4850152	4859719
no Peak	BC099544	uc007uya.1	chr14	106505415	106535076
no Peak	BC145649	uc009bfy.1	chr6	31116025	31168433
no Peak	Bcam	uc009fng.1	chr7	20349021	20355881
no Peak	Bckdhb	uc009qwr.1	chr9	83818758	84017847
no Peak	Bcl2l13	uc009dns.1	chr6	120786247	120817880
no Peak	Bcl6	uc007ytz.1	chr16	23965137	23988698
no Peak	Bcl7a	uc008znn.1	chr5	123794542	123810285
no Peak	Bcor	uc009squ.1	chrX	11613863	11737481
no Peak	Bhlhb9	uc009uhv.1	chrX	132374931	132425620
no Peak	Bicd2	uc007qjg.1	chr13	49436917	49482394
no Peak	Bin1	uc008ejh.1	chr18	32536870	32595394
no Peak	Blcap	uc008npc.1	chr2	157382097	157392097
no Peak	Blm	uc009iay.1	chr7	87614134	87679996
no Peak	Bmf	uc008lsc.1	chr2	118354492	118375414
no Peak	Bmpr1a	uc007taw.1	chr14	35224253	35315732
no Peak	Bmpr2	uc007bdz.1	chr1	59821480	59927703
no Peak	Bnc2	uc008tli.1	chr4	83920998	84320990
no Peak	Bnip3	uc009kfg.1	chr7	146082518	146101189
no Peak	Bpgm	uc009bhg.1	chr6	34426355	34455610
no Peak	Bphl	uc007qaz.1	chr13	34129509	34153755
no Peak	Brap	uc008zkb.1	chr5	122110594	122113982
no Peak	Brca1	uc007lpd.1	chr11	101350077	101413187
no Peak	Brca2	uc009atz.1	chr5	151325204	151332415
no Peak	Bre	uc008wza.1	chr5	32000422	32304991
no Peak	Bri3	uc009alp.1	chr5	145016104	145207626
no Peak	Brwd1	uc008acn.2	chr16	96288274	96304035
no Peak	Btbd7	uc007ouq.1	chr12	104022857	104116616
no Peak	Btbd9	uc008btw.1	chr17	30650429	30713114
no Peak	Btf3l4	uc008ubr.1	chr4	108490985	108506189
no Peak	Btg1	uc007gww.1	chr10	96079660	96082261
no Peak	Btrc	uc008hqx.1	chr19	45438240	45596727
no Peak	Bub1	uc008mgd.1	chr2	127626856	127657533
no Peak	Bud13	uc009phj.1	chr9	46091094	46106866
no Peak	Bzw2	uc007njr.1	chr12	36849365	36883336
no Peak	C030011O14Rik	uc008rtf.1	chr3	151944540	152003354
no Peak	C030039L03Rik	uc009fwx.1	chr7	28459679	28491501
no Peak	C030046E11Rik	uc008hdr.1	chr19	29596771	29655979
no Peak	C130022K22Rik	uc009cyj.1	chr6	91828046	91834981
no Peak	C1galt1c1	uc009tag.1	chrX	35983967	35988286
no Peak	C1galt1	uc009axg.1	chr6	7795332	7822047
no Peak	C230055K05Rik	uc008ykr.1	chr5	105242187	105288830
no Peak	C330002I19Rik	uc007nez.1	chr12	25659796	25680021
no Peak	C330006K01Rik	uc009aip.1	chr5	142939884	142946655
no Peak	C330007P06Rik	uc009sxu.1	chrX	34388545	34414110
no Peak	C330011K17Rik	uc007rav.1	chr13	67541369	67552547
no Peak	C330019L16Rik	uc009gmd.1	chr7	49864895	49897958
no Peak	C430048L16Rik	uc008sak.1	chr4	12016516	12023418
no Peak	C530043G21Rik	uc007dcr.1	chr1	158631772	158649041
no Peak	C730034F03Rik	uc007xgw.1	chr15	89259953	89263239
no Peak	C79127	uc009flg.1	chr7	19862155	19865398
no Peak	C920006C10Rik	uc007vzt.1	chr15	65618602	65657026
no Peak	Cab39	uc007bum.1	chr1	87690332	87746713
no Peak	Cabin1	uc007fqy.1	chr10	75119519	75130835
no Peak	Cachd1	uc008tvh.1	chr4	100449283	100676353
no Peak	Cacna2d1	uc008wmy.1	chr5	15440605	15876869
no Peak	Cacng6	uc009euy.1	chr7	3425422	3435658
no Peak	Cacng8	uc009euw.1	chr7	3394458	3415366
no Peak	Cadm1	uc009pho.1	chr9	47338434	47627163
no Peak	Cage1	uc007qdf.1	chr13	38112779	38128938
no Peak	Cald1	uc009bhk.1	chr6	34659443	34725469
no Peak	Camk1d	uc008ifp.1	chr2	5214502	5635710
no Peak	Camk2b	uc007hxw.1	chr11	5911667	5965751
no Peak	Camk2n1	uc008vkz.1	chr4	138011100	138014058
no Peak	Camsap1l1	uc007cur.1	chr1	138173770	138242681
no Peak	Camsap1	uc008itx.1	chr2	25810698	25838802
no Peak	Camta1	uc008vyp.1	chr4	150844284	151235855
no Peak	Caprin2	uc009eto.1	chr6	148791014	148844648
no Peak	Capzb	uc008vlx.1	chr4	138750025	138795346
no Peak	Car2	uc008oqt.1	chr3	14886724	14900769
no Peak	Casc4	uc008lzr.1	chr2	121692865	121759607
no Peak	Casc5	uc008lta.1	chr2	118872854	118929857
no Peak	Cask	uc009srp.1	chrX	13094207	13423667
no Peak	Casp3	uc009lql.1	chr8	47702760	47724062
no Peak	Casp8ap2	uc008sew.1	chr4	32702447	32728533
no Peak	Cat	uc008liw.1	chr2	103294159	103325277
no Peak	Cblb	uc007zlf.1	chr16	52031661	52208159
no Peak	cbp146	uc007noc.1	chr12	56035726	56087323
no Peak	Cbr1	uc007zzr.1	chr16	93608081	93610594
no Peak	Cbr4	uc009lub.1	chr8	63966580	63982279
no Peak	Cbwd1	uc008hax.1	chr19	24994918	25036074
no Peak	Cbx2	uc007mpt.1	chr11	118884342	118892584
no Peak	Ccar1	uc007fjb.1	chr10	62215921	62254979
no Peak	Ccdc126	uc009bwp.1	chr6	49269351	49291580
no Peak	Ccdc132	uc009avb.1	chr6	3448404	3551110
no Peak	Ccdc134	uc007wye.1	chr15	81958351	81972632
no Peak	Ccdc136	uc009bdk.1	chr6	29349588	29376953
no Peak	Ccdc15	uc009oum.1	chr9	37083419	37155977
no Peak	Ccdc18	uc008ynr.1	chr5	108561932	108661968
no Peak	Ccdc21	uc008vef.1	chr4	133720026	133742965
no Peak	Ccdc52	uc007zhg.1	chr16	44347569	44388499
no Peak	Ccdc55	uc007kgh.1	chr11	76865150	76891937
no Peak	Ccdc59	uc007gyp.1	chr10	105278534	105284566
no Peak	Ccdc93	uc007cju.1	chr1	123327643	123398170
no Peak	Ccnc	uc008scv.1	chr4	21654876	21677693
no Peak	Ccnf	uc008avh.1	chr17	24367970	24388354
no Peak	Ccng2	uc008yee.1	chr5	93696282	93705250
no Peak	Ccnj	uc008hlg.1	chr19	40905768	40922944
no Peak	Ccnl2	uc008wev.1	chr4	155186597	155189967
no Peak	Ccny	uc008eai.1	chr18	9314041	9450148
no Peak	Ccpg1	uc009qql.1	chr9	72833384	72849814
no Peak	Ccs	uc008gba.1	chr19	4825365	4839322
no Peak	Cd276	uc009pxc.1	chr9	58372106	58402939
no Peak	Cd59a	uc008ljo.1	chr2	103936009	103955506
no Peak	Cdc123	uc008ifu.1	chr2	5730564	5766006
no Peak	Cdc14b	uc007qyq.1	chr13	64296663	64376238
no Peak	Cdc25b	uc008mky.1	chr2	131012814	131024201
no Peak	Cdc27	uc007lwq.1	chr11	104363842	104411934
no Peak	Cdc2l1	uc008wdz.1	chr4	154998977	155013932
no Peak	Cdc2l5	uc007poe.1	chr13	17858066	17896836
no Peak	Cdc40	uc007exe.1	chr10	40551431	40602924
no Peak	Cdc42bpa	uc007dvs.1	chr1	181890890	182031403
no Peak	Cdc73	uc007cwx.1	chr1	145454628	145549814
no Peak	Cdh4	uc008ohv.1	chr2	179177271	179631110
no Peak	Cdk5rap1	uc008njb.1	chr2	154161121	154198455
no Peak	Cdk7	uc007rrk.1	chr13	101473269	101500878
no Peak	Cdkal1	uc007pyn.1	chr13	29417174	29947457
no Peak	Cdkl3	uc007iuz.1	chr11	51817823	51898611
no Peak	Cdkn1b	uc009ela.1	chr6	134870434	134874076
no Peak	Cdon	uc009otd.1	chr9	35228708	35314191
no Peak	Cdr2	uc009jni.1	chr7	128100553	128125798
no Peak	Cds2	uc008mmn.1	chr2	132088992	132121926
no Peak	Cenpc1	uc008xxc.1	chr5	86441049	86494496
no Peak	Cenpf	uc007eaq.1	chr1	191480523	191511965
no Peak	Cenpi	uc009ufu.1	chrX	130842701	130897178
no Peak	Cenpk	uc007rtd.1	chr13	105019034	105039697
no Peak	Cenpo	uc007mxp.1	chr12	4215691	4234294
no Peak	Cep76	uc008fmr.1	chr18	67777050	67800990
no Peak	Cetn3	uc007rid.1	chr13	81922290	81936156
no Peak	Cflar	uc007bcn.1	chr1	58768351	58815726
no Peak	Chaf1b	uc008aab.1	chr16	93884145	93894533
no Peak	Chchd3	uc009bgp.1	chr6	32801445	33010152
no Peak	Chchd7	uc008rwu.1	chr4	3866060	3877654
no Peak	Chd1l	uc008qox.1	chr3	97366461	97414113
no Peak	Chd1	uc008aou.1	chr17	15842253	15907328
no Peak	Chd6	uc008nrp.1	chr2	160790904	160934792
no Peak	Chd7	uc008rya.1	chr4	8618067	8793956
no Peak	Chd9	uc009msh.1	chr8	93479333	93513834
no Peak	Chic1	uc009tzl.1	chrX	100551894	100585381
no Peak	Chka	uc008fxf.1	chr19	3851772	3878614
no Peak	Chmp2b	uc007zqj.1	chr16	65539377	65562942
no Peak	Chm	uc009udn.1	chrX	110154200	110299124
no Peak	Chn1	uc008kdb.1	chr2	73448801	73613155
no Peak	Chn2	uc009bzo.1	chr6	53989925	54251804
no Peak	Chst12	uc009ahs.2	chr5	140981562	141001192
no Peak	Chsy1	uc009hhb.1	chr7	73254400	73318684
no Peak	Chuk	uc008hpg.1	chr19	44147825	44181932
no Peak	Churc1	uc007nyq.1	chr12	77866559	77884165
no Peak	cip7	uc009sli.1	chrX	6989224	7022269
no Peak	Cis4	uc008fve.1	chr18	88857458	89063599
no Peak	Cisd1	uc007foq.1	chr10	70793241	70807597
no Peak	Cisd2	uc008rll.1	chr3	135072975	135086397
no Peak	Cish	uc009rlc.1	chr9	107199019	107204292
no Peak	Cit	uc008zep.1	chr5	116295286	116375713
no Peak	Ckap2l	uc008mhp.1	chr2	129100161	129122900
no Peak	Ckap5	uc008kwb.1	chr2	91366951	91413224
no Peak	Clasp1	uc007cif.1	chr1	120285634	120506039
no Peak	Clasp2	uc009rwr.1	chr9	113650590	113753337
no Peak	Clcf1	uc008fzl.1	chr19	4214391	4223490
no Peak	Cldn14	uc008aad.1	chr16	93919277	94009082
no Peak	Cldnd1	uc007zoc.1	chr16	58728156	58734350
no Peak	Clip1	uc008zoa.1	chr5	124029078	124134300
no Peak	Clip2	uc008zwi.1	chr5	134965255	135028304
no Peak	Cln3	uc009jrz.1	chr7	133714913	133729331
no Peak	Cln8	uc009kze.1	chr8	14888535	14901719
no Peak	Clock	uc008xut.1	chr5	76664141	76733797
no Peak	Clp1	uc008kja.1	chr2	84563278	84567425
no Peak	Clpb	uc009ipd.1	chr7	108812281	108943974
no Peak	Clptm1	uc009fmr.1	chr7	20232064	20250379
no Peak	Clpx	uc009qda.1	chr9	65142101	65157037
no Peak	Clspn	uc008utn.1	chr4	126234268	126271147
no Peak	Clstn3	uc009dqw.1	chr6	124380784	124414742
no Peak	Cmpk	uc008ueg.1	chr4	114633242	114659751
no Peak	Cmtm4	uc009nan.1	chr8	106878415	106919596
no Peak	Cmtm6	uc009ryb.1	chr9	114640320	114658461
no Peak	Cnot2	uc007hce.1	chr10	115922221	116018567
no Peak	Cnot6l	uc008yfg.1	chr5	96504756	96591009
no Peak	Cno	uc008xez.1	chr5	37138612	37139918
no Peak	Cntrob	uc007jpp.1	chr11	69112997	69137375
no Peak	Cobl	uc007ibf.1	chr11	12204869	12364803
no Peak	Cog2	uc009nxc.1	chr8	127044726	127069674
no Peak	Cog7	uc009jnz.1	chr7	129066352	129125207
no Peak	Col4a3bp	uc007rnk.1	chr13	97312700	97407505
no Peak	Col5a1	uc008ixt.1	chr2	27742204	27893044
no Peak	Commd10	uc008evz.1	chr18	47118529	47247648
no Peak	Copa	uc007dpm.1	chr1	174012933	174034765
no Peak	Copb1	uc009jhx.1	chr7	121359072	121398194
no Peak	Cops4	uc008yhs.1	chr5	100947477	100976794
no Peak	Coq2	uc008yhv.1	chr5	101092598	101103270
no Peak	Coro1c	uc008yyw.1	chr5	114327071	114358715
no Peak	Coro2b	uc009qak.1	chr9	62301089	62384851
no Peak	Cotl1	uc009nqj.1	chr8	122333124	122364440
no Peak	Cox10	uc007jkp.1	chr11	63884815	63892916
no Peak	Cpox	uc007zoa.1	chr16	58670404	58680474
no Peak	Cpt2	uc008uan.1	chr4	107576586	107596139
no Peak	Cradd	uc007gwc.1	chr10	94637379	94786731
no Peak	Crbn	uc009ddc.1	chr6	106738741	106750068
no Peak	Creb3l2	uc009bjf.1	chr6	37281020	37392139
no Peak	Crk	uc007keq.1	chr11	75492811	75506362
no Peak	Crot	uc008wku.1	chr5	8986180	8997042
no Peak	Cry1	uc007gle.1	chr10	84594444	84647799
no Peak	Cry2	uc008kxz.1	chr2	92251416	92274185
no Peak	Csad	uc007xuv.1	chr15	102018973	102033594
no Peak	Csk	uc009pvl.1	chr9	57474452	57501438
no Peak	Csnk1e	uc007wtl.1	chr15	79248942	79272437
no Peak	Csnk1g1	uc009qef.1	chr9	65756816	65851975
no Peak	Csnk1g3	uc008eya.1	chr18	54021766	54115338
no Peak	Csrp2bp	uc008mqy.1	chr2	144194770	144233366
no Peak	Cstf2	uc009ufi.1	chrX	130593887	130610402
no Peak	Cstf3	uc008ljy.1	chr2	104430679	104451563
no Peak	Ctage5	uc007nqf.1	chr12	60230780	60291162
no Peak	Ctdspl2	uc008lzw.1	chr2	121782188	121816130
no Peak	Ctnnbip1	uc008vwm.1	chr4	148892351	148940545
no Peak	Ctnnbl1	uc008nph.1	chr2	157563197	157717350
no Peak	Ctps2	uc009uuo.1	chrX	159339536	159470257
no Peak	Cttnbp2nl	uc008quv.1	chr3	104807217	104855844
no Peak	Cugbp1	uc008kua.1	chr2	90780614	90857210
no Peak	Cul3	uc007brd.1	chr1	80263392	80337005
no Peak	Cul4b	uc009taa.1	chrX	35886450	35929373
no Peak	Cul5	uc009pmj.1	chr9	53429264	53478118
no Peak	Cutl1	uc009aal.1	chr5	136724004	137043301
no Peak	Cutl2	uc008zkm.1	chr5	122310224	122497834
no Peak	Cwc15	uc009oeo.1	chr9	14305062	14315064
no Peak	Cwf19l1	uc008hpk.1	chr19	44199297	44210366
no Peak	Cwf19l2	uc009oba.1	chr9	3404084	3479236
no Peak	Cxxc1	uc008fpg.1	chr18	74375865	74381145
no Peak	Cyb561	uc007lxs.1	chr11	105795017	105805461
no Peak	Cyb5d1	uc007jpz.1	chr11	69207113	69208848
no Peak	Cyb5r4	uc009qyb.1	chr9	86916884	86963083
no Peak	Cyfip1	uc009hdj.1	chr7	63097396	63147800
no Peak	Cyp20a1	uc007ben.1	chr1	60400215	60444231
no Peak	D030051N19Rik	uc008kws.1	chr2	91570294	91740794
no Peak	D0HXS9928E	uc009ton.1	chrX	71558371	71565472
no Peak	D12Ertd551e	uc007php.1	chr12	117519694	117629523
no Peak	D12Ertd553e	uc007nbc.1	chr12	12268982	12383167
no Peak	D130059P03Rik	uc009bke.1	chr6	38383949	38452581
no Peak	D14Ertd581e	uc007uvc.1	chr14	99498651	99653712
no Peak	D15Wsu169e	uc007wmj.1	chr15	76563886	76648581
no Peak	D16Ertd472e	uc007zsq.1	chr16	78543787	78576892
no Peak	D16H22S680E	uc007ynk.1	chr16	18300917	18344007
no Peak	D17Wsu92e	uc008bpr.1	chr17	27904553	27957487
no Peak	D18Ertd653e	uc008fng.1	chr18	68092910	68415203
no Peak	D19Ertd652e	uc008hvn.1	chr19	47861069	47993789
no Peak	D19Ertd737e	uc008ibt.1	chr19	60274488	60302604
no Peak	D1Ertd622e	uc007cfh.1	chr1	99540479	99558552
no Peak	D3Ertd300e	uc008pfl.1	chr3	54497024	54521567
no Peak	D430042O09Rik	uc009jqm.1	chr7	132851389	133018311
no Peak	D4Bwg0951e	uc008tjv.1	chr4	80556589	80600205
no Peak	D4Cole1e	uc008vwi.1	chr4	148841680	148859251
no Peak	D630040G17Rik	uc009mii.1	chr8	81552335	81717665
no Peak	D8Ertd82e	uc009llf.1	chr8	37157914	37210598
no Peak	D930005D10Rik	uc009aiu.1	chr5	142979385	143027031
no Peak	D930015E06Rik	uc008pps.1	chr3	83725286	83844083
no Peak	Dab1	uc008txw.1	chr4	104040164	104417447
no Peak	Dact2	uc008amv.1	chr17	14332550	14341101
no Peak	Dad1	uc007tvn.1	chr14	54859335	54873553
no Peak	Dapk1	uc007qvn.1	chr13	60703307	60864547
no Peak	Dars2	uc007dez.1	chr1	162975089	163000763
no Peak	Dars	uc007clr.1	chr1	130308698	130313915
no Peak	Dbf4	uc008wke.1	chr5	8401660	8422606
no Peak	Dbt	uc008rcg.1	chr3	116216058	116252310
no Peak	Dcbld1	uc007fbd.1	chr10	51953424	52040081
no Peak	Dctd	uc009lrq.1	chr8	49195792	49224232
no Peak	Dctn6	uc009lko.1	chr8	35153474	35171497
no Peak	Dcun1d2	uc009kxl.1	chr8	13259902	13288126
no Peak	Dcun1d5	uc009ocf.1	chr9	7184565	7207031
no Peak	Ddef1	uc007vzk.1	chr15	63920100	64214481
no Peak	Ddx10	uc009plz.1	chr9	52906741	53056196
no Peak	Ddx23	uc007xng.1	chr15	98481674	98493295
no Peak	Ddx46	uc007qrw.1	chr13	55736411	55780476
no Peak	Ddx50	uc007fhp.1	chr10	62078770	62113946
no Peak	Ddx59	uc007cuu.1	chr1	138311847	138336728
no Peak	Ddx6	uc009pdy.1	chr9	44412979	44441499
no Peak	Dennd1b	uc007cvy.1	chr1	140860362	140960292
no Peak	Dennd2a	uc009blx.1	chr6	39412376	39507833
no Peak	Dennd4c	uc008tma.1	chr4	86394458	86476071
no Peak	Depdc1b	uc007rvd.1	chr13	109106530	109197974
no Peak	Depdc5	uc008xac.1	chr5	33206369	33298947
no Peak	Dera	uc009enh.1	chr6	137703097	137786393
no Peak	Derl1	uc007vsq.1	chr15	57701056	57723973
no Peak	Det1	uc009hxo.1	chr7	85972359	85992097
no Peak	Dexi	uc007ydx.1	chr16	10530299	10543147
no Peak	Dgkh	uc007uso.1	chr14	78969415	79124896
no Peak	Dhtkd1	uc008iga.1	chr2	5819105	5863838
no Peak	Dhx15	uc008xkg.1	chr5	52544562	52581758
no Peak	Dhx29	uc007rww.1	chr13	113718000	113732039
no Peak	Dhx33	uc007jxh.1	chr11	70812617	70817934
no Peak	Dhx38	uc009nil.1	chr8	112082543	112089501
no Peak	Dhx57	uc008drc.1	chr17	80651740	80689816
no Peak	Diap1	uc008erk.1	chr18	38055748	38095065
no Peak	Diap2	uc009ueu.1	chrX	126284331	126863393
no Peak	Dip2c	uc007pku.1	chr13	9275771	9668171
no Peak	Dirc2	uc007zbo.1	chr16	35694988	35769442
no Peak	Dis3l2	uc007bvw.1	chr1	88600417	88946667
no Peak	Dlg7	uc007tie.1	chr14	48009041	48038082
no Peak	Dll1	uc008aoi.1	chr17	15504317	15512551
no Peak	Dlst	uc007ogi.1	chr12	86451807	86455027
no Peak	Dmc1	uc007wtu.1	chr15	79391929	79435514
no Peak	Dmxl1	uc008ewn.1	chr18	49992666	50124739
no Peak	Dnaja2	uc009mqa.1	chr8	88061538	88079170
no Peak	Dnajb4	uc008rsr.1	chr3	151847059	151873047
no Peak	Dnajb9	uc007nlo.1	chr12	45306883	45311055
no Peak	Dnajc10	uc008khi.1	chr2	80155622	80164945
no Peak	Dnajc1	uc008ilw.1	chr2	18230222	18314134
no Peak	Dnajc2	uc008wpb.1	chr5	21279339	21290983
no Peak	Dnajc9	uc007sjo.1	chr14	21206683	21208102
no Peak	Dnpep	uc007bov.1	chr1	75304470	75314212
no Peak	Dock1	uc009kdv.1	chr7	141862369	142365330
no Peak	Dock5	uc007ulm.1	chr14	68433626	68551629
no Peak	Dok2	uc007uoy.1	chr14	71174187	71178301
no Peak	Dpagt1	uc009pcv.1	chr9	44134927	44137969
no Peak	Dpf2	uc008gfy.1	chr19	5911825	5912805
no Peak	Dph5	uc008rbr.1	chr3	115591100	115604060
no Peak	Dpp8	uc009qcq.1	chr9	64880264	64930458
no Peak	Dpp9	uc008dbi.1	chr17	56336424	56358259
no Peak	Dppa3	uc009dpn.1	chr6	122576441	122580289
no Peak	Dpy19l4	uc008rzi.1	chr4	11192225	11249278
no Peak	Dpysl2	uc007uko.1	chr14	67421700	67487437
no Peak	Dr1	uc008ynt.1	chr5	108697915	108709540
no Peak	Drg1	uc007hsi.1	chr11	3157732	3166389
no Peak	Dse	uc007eus.1	chr10	33871198	33927357
no Peak	Dsg2	uc008eer.1	chr18	20716616	20744053
no Peak	Dsn1	uc008noj.1	chr2	156821000	156832811
no Peak	Dtd1	uc008mro.1	chr2	144425720	144594457
no Peak	Dtnb	uc007mwv.1	chr12	3572522	3721089
no Peak	Dtwd2	uc008ewl.1	chr18	49856467	49915229
no Peak	Dtx2	uc008zzm.1	chr5	136470746	136508734
no Peak	Dusp10	uc007dym.1	chr1	185858339	185899515
no Peak	Dusp11	uc009cqp.1	chr6	85892262	85911661
no Peak	Dusp7	uc009rjm.1	chr9	106270962	106278052
no Peak	Dync1li1	uc009rxx.1	chr9	114597948	114615789
no Peak	Dyrk1a	uc008abf.1	chr16	94791616	94885468
no Peak	Dzip1l	uc009rem.1	chr9	99530013	99569675
no Peak	Dzip3	uc007zjz.1	chr16	48925991	48994054
no Peak	E130308A19Rik	uc008tab.1	chr4	59639092	59767175
no Peak	Eapp	uc007nnu.1	chr12	55774453	55796852
no Peak	Ebpl	uc007ufv.1	chr14	61959597	61979276
no Peak	Ece1	uc008vjt.1	chr4	137418211	137493319
no Peak	Ece2	uc007yqi.1	chr16	20611673	20645988
no Peak	Eda2r	uc009tus.1	chrX	94531259	94572511
no Peak	Efhd2	uc008vpl.1	chr4	141414056	141430835
no Peak	Efna5	uc008dfg.1	chr17	62954103	63230666
no Peak	Eftud1	uc009idf.1	chr7	89797138	89926362
no Peak	EG210583	uc007gje.1	chr10	81111813	81130106
no Peak	EG432879	uc007usz.1	chr14	79851641	79854623
no Peak	EG434179	uc009gme.1	chr7	49915477	49948088
no Peak	EG435970	uc009gmh.1	chr7	50432957	50447479
no Peak	Ehbp1l1	uc008gew.1	chr19	5715795	5726317
no Peak	Ehbp1	uc007iec.1	chr11	22010355	22242295
no Peak	Ehmt1	uc008ipk.1	chr2	24690621	24775121
no Peak	Eif2ak1	uc009akt.1	chr5	144578660	144641348
no Peak	Eif2ak4	uc008lrv.1	chr2	118214352	118253949
no Peak	Eif2a	uc008pht.1	chr3	58329937	58349745
no Peak	Eif2b3	uc008uhu.1	chr4	116692036	116745009
no Peak	Eif2c3	uc008uth.1	chr4	126022628	126106638
no Peak	Eif2s3x	uc009ttc.1	chrX	91434047	91457990
no Peak	Eif3h	uc007vrb.1	chr15	51618108	51697007
no Peak	Eif4g3	uc008vka.1	chr4	137549384	137762386
no Peak	Elavl2	uc008toq.1	chr4	90917456	91066675
no Peak	Elavl3	uc009ono.1	chr9	21827254	21856454
no Peak	Elmo1	uc007ppn.1	chr13	20182464	20698394
no Peak	Elovl7	uc007rva.1	chr13	109004624	109073932
no Peak	Elp2	uc008egw.1	chr18	24762461	24776251
no Peak	Emd	uc009toa.1	chrX	71500177	71503086
no Peak	Emp1	uc009elo.1	chr6	135312948	135333191
no Peak	ENSMUSG00000048936	uc008hea.1	chr19	29828252	29879819
no Peak	Entpd6	uc008mui.1	chr2	150574884	150597409
no Peak	Eny2	uc007vpu.1	chr15	44259637	44269231
no Peak	Ep400	uc008yri.1	chr5	111158252	111199736
no Peak	Epb4.1l3	uc008dkp.1	chr17	69506149	69639327
no Peak	Epb4.1l5	uc007ciw.1	chr1	121444707	121545513
no Peak	Epb4.1	uc008vaj.1	chr4	131480090	131628012
no Peak	Epc1	uc008dzk.1	chr18	6488890	6490842
no Peak	Epha4	uc007bpz.1	chr1	77363759	77511663
no Peak	Ephb2	uc008vio.1	chr4	136325306	136391850
no Peak	Ephx2	uc007ujw.1	chr14	66703213	66743337
no Peak	Epm2aip1	uc009rvr.1	chr9	111174348	111181595
no Peak	Eppk1	uc007wio.1	chr15	75931917	75950625
no Peak	Eprs	uc007dzf.1	chr1	187186973	187233630
no Peak	Eps15l1	uc009mfr.1	chr8	74864897	74945359
no Peak	Erbb2ip	uc007rsl.1	chr13	104608865	104710594
no Peak	Erc1	uc009dmm.1	chr6	119703276	119798168
no Peak	Ercc3	uc008eje.1	chr18	32399984	32429801
no Peak	Ercc4	uc007yfx.1	chr16	13109828	13148827
no Peak	Ercc6	uc007szd.1	chr14	33326706	33355937
no Peak	Erich1	uc009kyx.1	chr8	14027564	14090327
no Peak	Ermp1	uc008hdv.1	chr19	29702489	29722910
no Peak	Evc2	uc008xfr.1	chr5	37729746	37779003
no Peak	Evi5	uc008ync.1	chr5	108224717	108298127
no Peak	Exoc1	uc008xuy.1	chr5	76958347	76970133
no Peak	Exoc2	uc007pzd.1	chr13	30905786	31065916
no Peak	Exoc4	uc009bgt.1	chr6	33199149	33922930
no Peak	Exoc5	uc007tjv.1	chr14	49631817	49686342
no Peak	Extl3	uc007uiy.1	chr14	65694420	65716908
no Peak	Ezh1	uc007lnw.1	chr11	101058700	101087727
no Peak	Ezh2	uc009btd.1	chr6	47502384	47545337
no Peak	F730031O20Rik	uc008ocs.1	chr2	172219293	172258360
no Peak	F730047E07Rik	uc008sdw.1	chr4	24423597	24530095
no Peak	Fads1	uc008gpd.1	chr19	10257462	10261863
no Peak	Fads2	uc008gpc.1	chr19	10160990	10175993
no Peak	Fahd1	uc008ayl.1	chr17	24985840	24987247
no Peak	Faim	uc009rdt.1	chr9	98886791	98902437
no Peak	Fam18b	uc007jkh.1	chr11	62692991	62708686
no Peak	Fanca	uc009nvf.1	chr8	125802159	125842476
no Peak	Fancm	uc007nre.1	chr12	66176592	66202442
no Peak	Fars2	uc007qck.1	chr13	36209279	36629462
no Peak	Fastkd2	uc007bgk.1	chr1	63777224	63782881
no Peak	Fbf1	uc007mki.1	chr11	116003598	116029492
no Peak	Fbln1	uc007xdc.1	chr15	85036440	85116086
no Peak	Fbxl10	uc008zmu.1	chr5	123337855	123439101
no Peak	Fbxl11	uc008fzy.1	chr19	4348195	4397077
no Peak	Fbxl17	uc008dfl.1	chr17	63408815	63848649
no Peak	Fbxl18	uc009aji.1	chr5	143633467	143656917
no Peak	Fbxl20	uc007lfn.1	chr11	97968539	98010930
no Peak	Fbxl4	uc008sdo.1	chr4	22284711	22361193
no Peak	Fbxl5	uc008xhz.1	chr5	44153550	44173335
no Peak	Fbxo10	uc008ssg.1	chr4	45064129	45097468
no Peak	Fbxo18	uc008ije.1	chr2	11669476	11699134
no Peak	Fbxo21	uc008zfz.1	chr5	118426778	118437575
no Peak	Fbxo2	uc008vuk.1	chr4	147534776	147540526
no Peak	Fbxo36	uc007btc.1	chr1	84836429	84897059
no Peak	Fbxo44	uc008vuj.1	chr4	147529606	147533989
no Peak	Fbxo8	uc009lsr.1	chr8	59029930	59072736
no Peak	Fcmd	uc008sxe.1	chr4	53727053	53776143
no Peak	Fer1l3	uc008hit.1	chr19	37973525	38118067
no Peak	Fez2	uc008dow.1	chr17	78777224	78817443
no Peak	Fgd4	uc007yir.1	chr16	16422070	16600132
no Peak	Fgfr1op	uc008aja.1	chr17	8358400	8368946
no Peak	Fgfr2	uc009jzt.1	chr7	137305964	137410322
no Peak	Fhl4	uc007gla.1	chr10	84559763	84565153
no Peak	Fig4	uc007exk.1	chr10	40907977	41023047
no Peak	Fignl1	uc007iar.1	chr11	11687433	11708935
no Peak	Flna	uc009tnz.1	chrX	71468799	71491873
no Peak	Flnc	uc009bdn.1	chr6	29383152	29411888
no Peak	Fmn1	uc008lpl.1	chr2	113167892	113556924
no Peak	Fmn2	uc007dtc.1	chr1	176431976	176752200
no Peak	Fmr1nb	uc009tiz.1	chrX	66015108	66057616
no Peak	Fmr1	uc009tiw.1	chrX	65931729	65971136
no Peak	Fnbp1	uc008jdm.1	chr2	30908754	30997526
no Peak	Fndc3a	uc007upg.1	chr14	72937759	73109810
no Peak	Fndc3b	uc008otp.1	chr3	27315082	27609299
no Peak	Fnip1	uc007ixx.1	chr11	54251690	54331738
no Peak	Fosl2	uc008wzi.1	chr5	32438906	32460212
no Peak	Foxj3	uc008ums.1	chr4	119212292	119276069
no Peak	Foxo1	uc008pei.1	chr3	52072295	52153460
no Peak	Foxred2	uc007wok.1	chr15	77770955	77787105
no Peak	Frg1	uc009lnx.1	chr8	42482818	42502428
no Peak	Frmd6	uc007ntv.1	chr12	71926500	72003221
no Peak	Frs2	uc007hct.1	chr10	116507182	116585530
no Peak	Fryl	uc008xsp.1	chr5	73510495	73647857
no Peak	Fry	uc009ats.1	chr5	150921244	151151580
no Peak	Fsd1l	uc008sxd.1	chr4	53644587	53672550
no Peak	Fstl1	uc007zej.1	chr16	37777140	37836602
no Peak	Fto	uc009mst.1	chr8	93837437	94192329
no Peak	Ftsj1	uc009sop.1	chrX	7815793	7829532
no Peak	Fuca1	uc008vhi.1	chr4	135476673	135496226
no Peak	Fundc1	uc009ssg.1	chrX	17133694	17149423
no Peak	Fyn	uc007evz.1	chr10	39089891	39285180
no Peak	Fyttd1	uc007yzp.1	chr16	32877925	32908959
no Peak	Fzd3	uc007ujb.1	chr14	65821515	65881258
no Peak	G630039H03Rik	uc007zbb.1	chr16	34690795	34725280
no Peak	Gaa	uc007mqh.1	chr11	119129357	119134766
no Peak	Gabpb1	uc008mdy.1	chr2	126464756	126502073
no Peak	Gabpb2	uc008qir.1	chr3	95007534	95021864
no Peak	Galnt7	uc009lsy.1	chr8	60003365	60131800
no Peak	Gan	uc009nox.1	chr8	119682034	119729086
no Peak	Gapvd1	uc008jiq.1	chr2	34532501	34610752
no Peak	Garnl1	uc007nox.1	chr12	56813454	56922154
no Peak	Gas8	uc009nwk.1	chr8	126042734	126060550
no Peak	Gatad1	uc008whh.1	chr5	3639968	3647917
no Peak	Gca	uc008jvp.1	chr2	62502383	62532166
no Peak	Gcn5l2	uc007lmd.1	chr11	100570389	100573768
no Peak	Gcnt1	uc008gxn.1	chr19	17400632	17447334
no Peak	Gdf15	uc009mbb.1	chr8	73153291	73156355
no Peak	Gemin8	uc009uwd.1	chrX	162608411	162628444
no Peak	Gfm2	uc007rnx.1	chr13	97907994	97938446
no Peak	Gfod1	uc007qfy.1	chr13	43360793	43399541
no Peak	Gfpt1	uc009cta.1	chr6	86992843	87038365
no Peak	Gfpt2	uc007irc.1	chr11	49607690	49652115
no Peak	Gins1	uc008mur.1	chr2	150735336	150751806
no Peak	Gins4	uc009ler.1	chr8	24337096	24348131
no Peak	Git2	uc008yzz.1	chr5	115177416	115223501
no Peak	Gk5	uc009rca.1	chr9	96019847	96083372
no Peak	Glb1	uc009rxm.1	chr9	114310236	114383495
no Peak	Gldc	uc008hek.1	chr19	30189310	30249908
no Peak	Gle1l	uc008jap.1	chr2	29790946	29794460
no Peak	Gli2	uc007cin.1	chr1	120744959	120950196
no Peak	Gli3	uc007pns.1	chr13	15555555	15821858
no Peak	Glrx5	uc007oxu.1	chr12	106270898	106279120
no Peak	Glt8d3	uc007xiq.1	chr15	93070172	93105515
no Peak	Gm603	uc007ykn.1	chr16	17209077	17214014
no Peak	Gm71	uc007nsm.1	chr12	70683262	70684015
no Peak	Gm846	uc009otj.1	chr9	35377868	35497903
no Peak	Gm944	uc008efg.1	chr18	21285842	21458640
no Peak	Gmcl1	uc009csl.1	chr6	86641763	86683348
no Peak	Gmeb1	uc008vau.1	chr4	131780933	131817464
no Peak	Gmfb	uc007thh.1	chr14	47427823	47441885
no Peak	Gna13	uc007mcd.1	chr11	109224107	109241788
no Peak	Gnaq	uc008gwt.1	chr19	16207320	16461943
no Peak	Gng12	uc009cew.1	chr6	66846424	66971288
no Peak	Gnl3l	uc009uov.1	chrX	147417683	147451793
no Peak	Gnptab	uc007grl.1	chr10	87842156	87910074
no Peak	Golga3	uc008yqd.1	chr5	110605719	110652174
no Peak	Golga4	uc009rzr.1	chr9	118415435	118439769
no Peak	Golga7	uc009leu.1	chr8	24356294	24367552
no Peak	Golph3	uc007vhp.1	chr15	12251250	12281022
no Peak	Gopc	uc007fbg.1	chr10	52056887	52101881
no Peak	Gpc3	uc009teg.1	chrX	49625622	49967098
no Peak	Gpd1l	uc009ryj.1	chr9	114811417	114842945
no Peak	Gpkow	uc009sma.1	chrX	7274259	7287385
no Peak	Gpr180	uc007uyq.1	chr14	118536379	118563454
no Peak	Gprasp1	uc009uhn.1	chrX	132277230	132338007
no Peak	Gprc5c	uc007mfx.1	chr11	114713368	114730410
no Peak	Gramd1b	uc009ozq.1	chr9	40105491	40263349
no Peak	Grb10	uc007ibb.1	chr11	11867366	11937358
no Peak	Grhl3	uc008vgr.1	chr4	135097802	135129535
no Peak	Grik3	uc008usa.1	chr4	125168074	125385592
no Peak	Gspt1	uc007yfg.1	chr16	11252659	11254418
no Peak	Gstcd	uc008rkh.1	chr3	132645514	132754997
no Peak	Gt4-1	uc007yfy.1	chr16	13256591	13326664
no Peak	Gtdc1	uc008jpb.1	chr2	44488648	44782756
no Peak	Gtf2a1	uc007oks.1	chr12	92797154	92828927
no Peak	Gtf2a2	uc009qnp.1	chr9	69860356	69866028
no Peak	Gtf2h2	uc007rqv.1	chr13	101238539	101262516
no Peak	Gtf2h5	uc008aga.1	chr17	6079864	6085479
no Peak	Gtf2ird1	uc008zvv.1	chr5	134833530	134932581
no Peak	Gtf3c1	uc009jqj.1	chr7	132805471	132851202
no Peak	Gtf3c5	uc008iyt.1	chr2	28434601	28438766
no Peak	Gtlf3a	uc007jgv.1	chr11	60734442	60745369
no Peak	Gtpbp4	uc007pkp.1	chr13	8971723	8995258
no Peak	H2-M5	uc008clt.1	chr17	37123799	37126449
no Peak	Hace1	uc007fad.1	chr10	45297694	45432050
no Peak	Hadhb	uc008wve.1	chr5	30481828	30511123
no Peak	Hars	uc008eoq.1	chr18	36932886	36942774
no Peak	Hbegf	uc008enm.1	chr18	36672332	36675428
no Peak	Hdac11	uc009cxv.1	chr6	91106808	91124677
no Peak	Hdac2	uc007eve.1	chr10	36694349	36715917
no Peak	Hdhd2	uc008fqs.1	chr18	77182853	77200792
no Peak	Hdh	uc008xdc.1	chr5	35104388	35252045
no Peak	Hdlbp	uc007cdz.1	chr1	95325145	95342229
no Peak	Heatr6	uc007kpt.1	chr11	83567138	83587794
no Peak	Hemk1	uc009rlf.1	chr9	107237475	107240626
no Peak	Herc1	uc009qep.1	chr9	66198256	66258862
no Peak	Herpud2	uc009oph.1	chr9	24912576	24956075
no Peak	Hibadh	uc009byw.1	chr6	52496223	52590294
no Peak	Hipk2	uc009bkx.1	chr6	38647904	38825952
no Peak	Hipk3	uc008lju.1	chr2	104269920	104334401
no Peak	Hira	uc007yor.1	chr16	18877129	18928104
no Peak	Hivep2	uc007elg.1	chr10	13685882	13871184
no Peak	Hk1	uc007fgz.1	chr10	61732609	61842631
no Peak	Hlcs	uc008aai.1	chr16	94451175	94511893
no Peak	Hmg20a	uc009ptf.1	chr9	56266652	56344743
no Peak	Hmgb2l1	uc009mgw.1	chr8	77517601	77525789
no Peak	Hnrpll	uc008dqm.1	chr17	80452712	80461674
no Peak	Homer1	uc007rlc.1	chr13	94074753	94174078
no Peak	Homez	uc007txd.1	chr14	55471573	55482943
no Peak	Hook1	uc008ttc.1	chr4	95634069	95690965
no Peak	Hook3	uc009lhj.1	chr8	27142361	27229486
no Peak	Hpcal1	uc007ncx.1	chr12	17697619	17798732
no Peak	Hps4	uc008ytd.1	chr5	112772144	112807433
no Peak	Hps6	uc008hrx.1	chr19	46077997	46080643
no Peak	Hrbl	uc009ado.1	chr5	138104051	138125921
no Peak	Hrb	uc007bse.1	chr1	82836057	82892850
no Peak	Hs3st3b1	uc007jkn.1	chr11	63698194	63735786
no Peak	Hsbp1	uc009npm.1	chr8	121868437	121872829
no Peak	Hsd17b11	uc008yjy.1	chr5	104418783	104450815
no Peak	Hsd17b12	uc008lgq.1	chr2	93954732	93998066
no Peak	Hsd17b7	uc007dlq.1	chr1	171885631	171899336
no Peak	Hsp110	uc009apx.1	chr5	150416861	150438890
no Peak	Hspa14	uc008ief.1	chr2	3406125	3430086
no Peak	Htra1	uc009kau.1	chr7	138079748	138129167
no Peak	Hus1	uc007hzs.1	chr11	8897359	8911140
no Peak	Huwe1	uc009upk.1	chrX	148237824	148295089
no Peak	Ifnar1	uc007zxo.1	chr16	91485493	91507686
no Peak	Igbp1	uc009tvz.1	chrX	97689683	97711340
no Peak	Ighmbp2	uc008fwa.1	chr19	3259075	3283010
no Peak	Igsf9b	uc009oql.1	chr9	27106812	27137720
no Peak	Il17rd	uc007stl.1	chr14	27852186	27920472
no Peak	Ildr1	uc007zcr.1	chr16	36694123	36717491
no Peak	Immp2l	uc007nll.1	chr12	41750676	43056573
no Peak	Immt	uc009chg.1	chr6	71781324	71811100
no Peak	Impad1	uc008rxc.1	chr4	4691500	4720453
no Peak	Impdh1	uc009bdb.1	chr6	29150439	29166350
no Peak	Inadl	uc008tuc.1	chr4	98062516	98386294
no Peak	Insig2	uc007cjq.1	chr1	123200929	123229157
no Peak	Insr	uc009krd.2	chr8	3150921	3279617
no Peak	Ints10	uc009lwn.1	chr8	71317852	71351543
no Peak	Ints3	uc008qcf.1	chr3	90211823	90237558
no Peak	Ints4	uc009ijh.1	chr7	104629531	104662747
no Peak	Ints9	uc007uiv.1	chr14	65568881	65654397
no Peak	Ipo11	uc007rtx.1	chr13	107584518	107726995
no Peak	Iqce	uc009ahz.1	chr5	141159763	141178332
no Peak	Iqgap1	uc009ibd.1	chr7	87894265	87948180
no Peak	Iqgap2	uc007rmo.1	chr13	96397131	96661877
no Peak	Iqgap3	uc008ptx.1	chr3	87885972	87891474
no Peak	Iqwd1	uc007djb.1	chr1	167259631	167390418
no Peak	Irak3	uc007het.1	chr10	119578709	119638593
no Peak	Irf2	uc009lqo.1	chr8	47825128	47932812
no Peak	Irs2	uc009kuz.1	chr8	10986963	11008430
no Peak	Itch	uc008nkf.1	chr2	154959216	155052590
no Peak	Itfg1	uc009mqf.1	chr8	88242438	88364671
no Peak	Itga1	uc007rxx.1	chr13	115748288	115892172
no Peak	Itga6	uc008kbb.1	chr2	71625139	71659000
no Peak	Itgae	uc007jzy.1	chr11	72904084	72960943
no Peak	Itgav	uc008kic.1	chr2	83564553	83603863
no Peak	Itpa	uc008mjt.1	chr2	130493576	130502828
no Peak	Itpr1	uc009ddh.1	chr6	108163089	108501104
no Peak	Itsn1	uc007zyj.1	chr16	91729615	91920824
no Peak	Ivns1abp	uc007cym.1	chr1	153191627	153203928
no Peak	Jakmip1	uc008xfj.1	chr5	37442154	37516534
no Peak	Jarid1a	uc009dne.1	chr6	120314141	120369579
no Peak	Jmjd1b	uc008elp.1	chr18	34936661	34984612
no Peak	Jmjd2a	uc008ujp.1	chr4	117814647	117852551
no Peak	Jmjd2c	uc008tji.1	chr4	73897851	73977464
no Peak	Jundm2	uc007ohb.1	chr12	86940054	86980828
no Peak	Katnal2	uc008fqy.1	chr18	77241169	77286035
no Peak	Kbtbd3	uc009obj.1	chr9	4309834	4331711
no Peak	Kbtbd7	uc007usy.1	chr14	79826317	79830845
no Peak	Kbtbd8	uc009czw.2	chr6	95067899	95079781
no Peak	Kcnh2	uc008wrc.1	chr5	23825406	23857422
no Peak	Kcnk1	uc009nyr.1	chr8	128519069	128554585
no Peak	Kcnq1	uc009kpb.1	chr7	150293158	150612947
no Peak	Kctd18	uc007bbh.1	chr1	58016897	58026896
no Peak	Kctd9	uc007ule.1	chr14	68334207	68357718
no Peak	Khdrbs1	uc008uye.1	chr4	129406123	129419526
no Peak	Kif13a	uc007qhn.1	chr13	46844456	47025087
no Peak	Kif16b	uc008mpz.1	chr2	142444080	142727200
no Peak	Kif18a	uc008lmb.1	chr2	109120894	109150991
no Peak	Kif1b	uc008vwa.1	chr4	148607842	148681807
no Peak	Kif1c	uc007jwk.1	chr11	70514049	70520847
no Peak	Kif23	uc009pzx.1	chr9	61773336	61794564
no Peak	Kif24	uc008siq.1	chr4	41360580	41411881
no Peak	Kif5a	uc007hit.1	chr10	126666105	126700136
no Peak	Kif5b	uc008dzf.1	chr18	6202223	6241498
no Peak	Kifc1	uc008beq.1	chr17	27054035	27062232
no Peak	Kifc3	uc009mxz.1	chr8	97650425	97662019
no Peak	Kit	uc008xuh.1	chr5	75971048	76052746
no Peak	Klf13	uc009hfn.1	chr7	71036252	71083743
no Peak	Klf15	uc009cxj.1	chr6	90412619	90425203
no Peak	Klf5	uc007uvf.1	chr14	99697909	99704550
no Peak	Klhdc2	uc007nry.1	chr12	70397754	70402104
no Peak	Klhdc5	uc009esu.1	chr6	147039596	147061300
no Peak	Klhl13	uc009suv.1	chrX	22796396	22942179
no Peak	Klhl22	uc007ylz.1	chr16	17759755	17779299
no Peak	Klhl24	uc007yph.1	chr16	20097626	20127817
no Peak	Klhl25	uc009hwz.1	chr7	82993282	83012377
no Peak	Klhl2	uc009luz.1	chr8	67218644	67373716
no Peak	Klhl7	uc008wqx.1	chr5	23606429	23641819
no Peak	Kntc1	uc008zoo.1	chr5	124199734	124271602
no Peak	Kpna1	uc007zca.1	chr16	35983448	36005274
no Peak	Kpna3	uc007ufw.1	chr14	61986467	62058628
no Peak	Kpna4	uc008pme.1	chr3	68876142	68931014
no Peak	Lace1	uc007eyq.1	chr10	42032390	42198371
no Peak	Lamb1-1	uc007nhc.1	chr12	31950158	31953725
no Peak	Lamp2	uc009szv.1	chrX	35754537	35809632
no Peak	Lancl2	uc009ccn.1	chr6	57652629	57688475
no Peak	Large	uc009mgs.1	chr8	75338497	75876455
no Peak	Lars2	uc009sgd.1	chr9	123276057	123371782
no Peak	Las1l	uc009tud.1	chrX	93130651	93152298
no Peak	Lass6	uc008jxs.1	chr2	68699613	68949347
no Peak	Lats1	uc007eif.1	chr10	7401006	7422918
no Peak	Lca5	uc009qwg.1	chr9	83284961	83334705
no Peak	Lcmt1	uc009jpp.1	chr7	130521495	130573872
no Peak	Lcor	uc008hly.1	chr19	41557134	41634271
no Peak	Ldb3	uc007tba.1	chr14	35339884	35401867
no Peak	Ldlrad3	uc008lhu.1	chr2	101951700	102026534
no Peak	Lef1	uc008rjf.1	chr3	130813388	130926249
no Peak	Lemd1	uc007coi.1	chr1	134088007	134106123
no Peak	Lemd3	uc007hfi.1	chr10	120360466	120416386
no Peak	Leprotl1	uc009lkp.1	chr8	35198625	35209793
no Peak	Lgmn	uc007ouf.1	chr12	103632307	103677907
no Peak	Lhfp	uc008pep.1	chr3	52845468	53065601
no Peak	Lif	uc007hut.1	chr11	4157570	4172517
no Peak	Lin28b	uc007faa.1	chr10	45096438	45190007
no Peak	Lin52	uc007ofl.1	chr12	85792457	85872483
no Peak	Lman1	uc008ffo.1	chr18	66143342	66162266
no Peak	Lmbrd2	uc007vfj.1	chr15	9070325	9127206
no Peak	Lmo4	uc008rpn.1	chr3	143851493	143867936
no Peak	LOC433791	uc008vse.1	chr4	145540560	146311515
no Peak	Loh11cr2a	uc009oxb.1	chr9	38525882	38550922
no Peak	Lonrf1	uc009llj.1	chr8	37279117	37312570
no Peak	Lpgat1	uc007ecs.1	chr1	193541902	193602508
no Peak	Lphn2	uc008rsb.1	chr3	148478549	148617699
[truncated: 1,082 more rows]

## Sheet: MouseCD4+CD8+
Peak Group	GeneSymbol	transcriptId	chrom	lxStart	lxEnd
RNAP II total no Ser5P	Cd164	uc007exv.1	chr10	41239305	41250848
RNAP II total no Ser5P	Cdc2a	uc007fmr.1	chr10	68799382	68815660
RNAP II total no Ser5P	1110038D17Rik	uc007fqk.1	chr10	74969558	74980067
RNAP II total no Ser5P	Map2k2	uc007gfx.1	chr10	80568707	80587081
RNAP II total no Ser5P	Cnot2	uc007hce.1	chr10	115922221	116018567
RNAP II total no Ser5P	Rap1b	uc007hdr.1	chr10	117251652	117283030
RNAP II total no Ser5P	Wdr92	uc007icd.1	chr11	17111895	17135203
RNAP II total no Ser5P	Itk	uc007iog.1	chr11	46138651	46203017
RNAP II total no Ser5P	Hist3h2ba	uc007jcr.1	chr11	58762412	58763032
RNAP II total no Ser5P	Alkbh5	uc007jgd.1	chr11	60351479	60369399
RNAP II total no Ser5P	Slc43a2	uc007keb.1	chr11	75345199	75388543
RNAP II total no Ser5P	Ywhae	uc007ket.1	chr11	75546440	75579340
RNAP II total no Ser5P	Zfp207	uc007klz.1	chr11	80196847	80209639
RNAP II total no Ser5P	Tada2l	uc007kqf.1	chr11	83892421	83943070
RNAP II total no Ser5P	Gm525	uc007kwg.1	chr11	88935154	88954378
RNAP II total no Ser5P	Ppp1r9b	uc007kzr.1	chr11	94852525	94868197
RNAP II total no Ser5P	Smarce1	uc007lii.1	chr11	99070361	99092331
RNAP II total no Ser5P	Nsf	uc007lvv.1	chr11	103741831	103815370
RNAP II total no Ser5P	Map4k4	uc007ats.1	chr1	39957757	40083155
RNAP II total no Ser5P	Atp5h	uc007mhm.1	chr11	115277010	115281233
RNAP II total no Ser5P	Hn1	uc007mhv.1	chr11	115358666	115375684
RNAP II total no Ser5P	Tmc6	uc007mno.1	chr11	117627301	117641935
RNAP II total no Ser5P	Sec23a	uc007npw.1	chr12	60059370	60113004
RNAP II total no Ser5P	Ppp2r5e	uc007nxe.1	chr12	76551867	76697187
RNAP II total no Ser5P	Rin3	uc007ouc.1	chr12	103521283	103629061
RNAP II total no Ser5P	Bcl11b	uc007ozh.1	chr12	109148612	109241624
RNAP II total no Ser5P	Yy1	uc007pac.1	chr12	110031520	110054842
RNAP II total no Ser5P	Nck2	uc007avo.1	chr1	43502595	43627357
RNAP II total no Ser5P	Mcm10	uc008ifi.1	chr2	4911793	4933781
RNAP II total no Ser5P	Them2	uc007pwj.1	chr13	24909823	24923358
RNAP II total no Ser5P	Phf2	uc007qin.1	chr13	48897118	48966252
RNAP II total no Ser5P	Zcchc9	uc007rkb.1	chr13	91936137	91947301
RNAP II total no Ser5P	Il6st	uc007rwg.1	chr13	113254316	113297049
RNAP II total no Ser5P	Pip4k2a	uc008imb.1	chr2	18763882	18919748
RNAP II total no Ser5P	Psd4	uc008ioy.1	chr2	24223194	24264249
RNAP II total no Ser5P	Ppp2r2a	uc007ukv.1	chr14	67637469	67647867
RNAP II total no Ser5P	1190002H23Rik	uc007ust.1	chr14	79688556	79701442
RNAP II total no Ser5P	Ywhaz	uc007vmz.1	chr15	36700524	36723999
RNAP II total no Ser5P	Azin1	uc007vns.1	chr15	38417184	38449021
RNAP II total no Ser5P	Rad21	uc007vrd.1	chr15	51794151	51823108
RNAP II total no Ser5P	Med30	uc007vrg.1	chr15	52543999	52561986
RNAP II total no Ser5P	Ly6e	uc007wgh.1	chr15	74786082	74789761
RNAP II total no Ser5P	Ddx17	uc007wtt.1	chr15	79365090	79377171
RNAP II total no Ser5P	Grap2	uc007wvo.1	chr15	80403023	80480728
RNAP II total no Ser5P	Arid2	uc007xkd.1	chr15	96187205	96235894
RNAP II total no Ser5P	Pp11r	uc007xky.1	chr15	97541449	97561770
RNAP II total no Ser5P	Rapgef3	uc007xla.1	chr15	97575383	97598097
RNAP II total no Ser5P	Acvrl1	uc007xsn.1	chr15	100958967	100975767
RNAP II total no Ser5P	Cluap1	uc007xzb.1	chr16	3909008	3941147
RNAP II total no Ser5P	A630055G03Rik	uc007yek.1	chr16	10835180	10841964
RNAP II total no Ser5P	Zc3h7a	uc007yfa.1	chr16	11155928	11162770
RNAP II total no Ser5P	4921513D23Rik	uc007ygv.1	chr16	14110625	14159367
RNAP II total no Ser5P	Bcl6	uc007ytz.1	chr16	23965137	23988698
RNAP II total no Ser5P	Parp14	uc007zbt.1	chr16	35857350	35871586
RNAP II total no Ser5P	Lrriq2	uc007zlr.1	chr16	55902399	55934961
RNAP II total no Ser5P	Bach1	uc007zuq.1	chr16	87699198	87733591
RNAP II total no Ser5P	AK138253	uc008aeh.1	chr17	3103174	3114795
RNAP II total no Ser5P	Rab14	uc008jkb.1	chr2	35039122	35056640
RNAP II total no Ser5P	AK019420	uc008fcg.1	chr18	61748866	61749967
RNAP II total no Ser5P	Atp5a1	uc008fru.1	chr18	78012506	78021607
RNAP II total no Ser5P	Cyb5	uc008fuw.1	chr18	85020805	85049255
RNAP II total no Ser5P	Rela	uc008gee.1	chr19	5637489	5648130
RNAP II total no Ser5P	Cdca7	uc008kbx.1	chr2	72314275	72324947
RNAP II total no Ser5P	Sp3	uc008kcc.1	chr2	72774489	72818503
RNAP II total no Ser5P	Pten	uc008hfq.1	chr19	32832066	32877333
RNAP II total no Ser5P	AK158034	uc008hwu.1	chr19	53517719	53539286
RNAP II total no Ser5P	1200013B08Rik	uc009tbw.1	chrX	45499703	45514740
RNAP II total no Ser5P	Ard1	uc009tng.1	chrX	71162213	71167252
RNAP II total no Ser5P	Caprin1	uc008lje.1	chr2	103607265	103637221
RNAP II total no Ser5P	AK040009	uc008mau.1	chr2	122292318	122293477
RNAP II total no Ser5P	Clk1	uc007bbs.1	chr1	58468843	58480932
RNAP II total no Ser5P	Raly	uc008njr.1	chr2	154616892	154692979
RNAP II total no Ser5P	5830472M02Rik	uc008ntd.1	chr2	163428049	163444749
RNAP II total no Ser5P	Cse1l	uc008nyt.1	chr2	166760252	166770353
RNAP II total no Ser5P	Cstf1	uc008ocp.1	chr2	172196196	172206586
RNAP II total no Ser5P	Elf2	uc008pds.1	chr3	51059586	51144562
RNAP II total no Ser5P	1110013L07Rik	uc008pxy.1	chr3	88987146	88993211
RNAP II total no Ser5P	Krtcap2	uc008pyl.1	chr3	89050359	89053644
RNAP II total no Ser5P	Tpm3	uc008qbg.1	chr3	89876615	89904526
RNAP II total no Ser5P	Ctdsp1	uc007blz.1	chr1	74438172	74443859
RNAP II total no Ser5P	Sfrs11	uc008rvo.1	chr3	157673456	157699603
RNAP II total no Ser5P	Rab2	uc008rxw.1	chr4	8462790	8534849
RNAP II total no Ser5P	Plekhf2	uc008ryw.1	chr4	10915808	10934707
RNAP II total no Ser5P	Cul3	uc007brd.1	chr1	80263392	80337005
RNAP II total no Ser5P	mKIAA0694	uc007brf.1	chr1	80520290	80589431
RNAP II total no Ser5P	Rad23b	uc008sxj.1	chr4	55362935	55404084
RNAP II total no Ser5P	AK088920	uc008szv.1	chr4	59484910	59488448
RNAP II total no Ser5P	Stil	uc008ueh.1	chr4	114672804	114715500
RNAP II total no Ser5P	Lck	uc008uxj.1	chr4	129225601	129250850
RNAP II total no Ser5P	Khdrbs1	uc008uye.1	chr4	129406123	129419526
RNAP II total no Ser5P	D4Wsu53e	uc008vfy.1	chr4	134479539	134483285
RNAP II total no Ser5P	Tnfrsf1b	uc008vrt.1	chr4	144802270	144836773
RNAP II total no Ser5P	Ramp1	uc007bzx.1	chr1	93076622	93120973
RNAP II total no Ser5P	Klf3	uc008xms.1	chr5	65194761	65221368
RNAP II total no Ser5P	Rhoh	uc008xoc.1	chr5	66252458	66287939
RNAP II total no Ser5P	AK138853	uc008xof.1	chr5	66326213	66335589
RNAP II total no Ser5P	Denr	uc008zor.1	chr5	124357283	124378841
RNAP II total no Ser5P	Mad1l1	uc009ahj.1	chr5	140484642	140797506
RNAP II total no Ser5P	Card11	uc009aij.1	chr5	141348952	141476446
RNAP II total no Ser5P	Pan3	uc009aod.1	chr5	148242464	148360071
RNAP II total no Ser5P	Slc35b4	uc009bgx.1	chr6	34105878	34127054
RNAP II total no Ser5P	Mpp6	uc009bwv.1	chr6	50060375	50148581
RNAP II total no Ser5P	AK042210	uc009cgq.1	chr6	71307142	71310823
RNAP II total no Ser5P	Pcbp1	uc009csc.1	chr6	86474490	86476159
RNAP II total no Ser5P	Edem1	uc009ddq.1	chr6	108778634	108809350
RNAP II total no Ser5P	Plxnd1	uc009djn.1	chr6	115904828	115945023
RNAP II total no Ser5P	Il17ra	uc009dnj.1	chr6	120413251	120433051
RNAP II total no Ser5P	Pex5	uc009dqs.1	chr6	124346833	124365085
RNAP II total no Ser5P	Ccdc9	uc009fhm.1	chr7	16859393	16872129
RNAP II total no Ser5P	Prkd2	uc009fig.1	chr7	17428282	17455810
RNAP II total no Ser5P	Kcnn4	uc009fpl.1	chr7	25155281	25170228
RNAP II total no Ser5P	Mef2a	uc009hif.1	chr7	74378716	74517744
RNAP II total no Ser5P	Clns1a	uc009ijr.1	chr7	104845200	104867389
RNAP II total no Ser5P	Il4ra	uc009jqd.1	chr7	132695795	132722988
RNAP II total no Ser5P	Nap1l4	uc009kpl.1	chr7	150699483	150734995
RNAP II total no Ser5P	Leprotl1	uc009lkp.1	chr8	35198625	35209793
RNAP II total no Ser5P	Jund1	uc009mbe.1	chr8	73222847	73224515
RNAP II total no Ser5P	Zswim4	uc009mmg.1	chr8	86734840	86760941
RNAP II total no Ser5P	Cbfb	uc009nbp.1	chr8	107694573	107741886
RNAP II total no Ser5P	Sf3b3	uc009nlb.1	chr8	113334391	113370703
RNAP II total no Ser5P	AK163095	uc009nyw.1	chr8	129112197	129114990
RNAP II total no Ser5P	Hspa8	uc009ozx.1	chr9	40609355	40613282
RNAP II total no Ser5P	Thy1	uc009pbl.1	chr9	43851466	43856662
RNAP II total no Ser5P	Ddx6	uc009pdz.1	chr9	44412980	44445189
RNAP II total no Ser5P	Rbm7	uc009pic.1	chr9	48296805	48303410
RNAP II total no Ser5P	Tle3	uc009pzo.1	chr9	61220172	61266304
RNAP II total no Ser5P	Stx6	uc007dbd.1	chr1	157038558	157055386
RNAP II total no Ser5P	Fem1b	uc009qam.1	chr9	62639627	62659409
RNAP II total no Ser5P	Gtf2a2	uc009qns.1	chr9	69860356	69870654
RNAP II total no Ser5P	Suhw4	uc009qpq.1	chr9	72122705	72211578
RNAP II total no Ser5P	Tmem30a	uc009qux.1	chr9	79620358	79641237
RNAP II total no Ser5P	Fbxo5	uc007egj.1	chr10	4541075	4547383
RNAP II total no Ser5P	Sft2d2	uc007dix.1	chr1	167104627	167124451
RNAP II total no Ser5P	Bclaf1	uc007enw.1	chr10	20042774	20064419
RNAP II total no Ser5P	Rcsd1	uc007djj.1	chr1	167579075	167638225
RNAP II total no Ser5P	AK041716	uc007eok.1	chr10	20906749	20908423
RNAP II total no Ser5P	Tmem49	uc007ksv.1	chr11	86397366	86497324
RNAP II total no Ser5P	AI314180	uc008sze.1	chr4	58812902	58925597
RNAP II total no Ser5P	Park7	uc008vxz.1	chr4	150271250	150283959
RNAP II total no Ser5P	Nrip1	uc007zry.1	chr16	76291106	76374072
RNAP II total no Ser5P	Wac	uc008ead.1	chr18	7869236	7927071
RNAP II total no Ser5P	Wdr12	uc007beg.1	chr1	60133711	60155335
RNAP II total no Ser5P	Mbnl1	uc008pjb.1	chr3	60277031	60433670
RNAP II total no Ser5P	5830443L24Rik	uc008yku.1	chr5	105443171	105451108
RNAP II total no Ser5P	Coro1a	uc009jsl.1	chr7	133843287	133848268
RNAP II total no Ser5P	Cbfa2t3h	uc009ntn.1	chr8	125153890	125222877
RNAP II total no Ser5P	Arpp21	uc009rwb.1	chr9	111967761	112134931
RNAP II total no Ser5P	Ate1	uc009kac.1	chr7	137535007	137663475
RNAP II total and Ser5P	Btg1	uc007gww.1	chr10	96079660	96082261
RNAP II total and Ser5P	AK177174	uc007hso.1	chr11	3208804	3209075
RNAP II total and Ser5P	AK020764	uc007kul.1	chr11	87569078	87570769
RNAP II total and Ser5P	Cacnb1	uc007lff.1	chr11	97864214	97883956
RNAP II total and Ser5P	BC010304	uc007qio.1	chr13	48974585	49063197
RNAP II total and Ser5P	Colq	uc007sxv.1	chr14	32337595	32390503
RNAP II total and Ser5P	Dad1	uc007tvm.1	chr14	54855159	54873553
RNAP II total and Ser5P	A130092J06Rik	uc008jek.1	chr2	31922404	31939225
RNAP II total and Ser5P	Sfrs10	uc007ysd.1	chr16	22245813	22266002
RNAP II total and Ser5P	Ets2	uc008ace.1	chr16	95924092	95942656
RNAP II total and Ser5P	Sfrs3	uc008bse.1	chr17	29169617	29180311
RNAP II total and Ser5P	Hspa1b	uc008ceo.1	chr17	35093373	35096183
RNAP II total and Ser5P	Zfp36l2	uc008dsq.1	chr17	84583268	84587287
RNAP II total and Ser5P	Zmat2	uc008eos.1	chr18	36953576	36959314
RNAP II total and Ser5P	Dntt	uc008hlo.1	chr19	41103764	41134015
RNAP II total and Ser5P	Rbm38	uc008odh.1	chr2	172847402	172860232
RNAP II total and Ser5P	Ncl	uc007bvl.1	chr1	88241293	88256030
RNAP II total and Ser5P	Khdrbs1	uc008uyc.1	chr4	129380980	129419526
RNAP II total and Ser5P	Gltp	uc008yzw.1	chr5	115119510	115140944
RNAP II total and Ser5P	AU042671	uc008zit.1	chr5	121761631	121779624
RNAP II total and Ser5P	Cd8b1	uc009cgp.1	chr6	71272805	71287445
RNAP II total and Ser5P	Cd8a	uc009cgr.1	chr6	71323420	71329165
RNAP II total and Ser5P	Sertad1	uc009fwh.1	chr7	28271971	28275333
RNAP II total and Ser5P	Zfp36	uc009fys.1	chr7	29161802	29164247
RNAP II total and Ser5P	Abhd2	uc009hyc.1	chr7	86418151	86506487
RNAP II total and Ser5P	Aqp11	uc009ijs.1	chr7	104874888	104886757
RNAP II total and Ser5P	Maz	uc009juc.1	chr7	134168817	134170533
RNAP II total and Ser5P	Cd3d	uc009pey.1	chr9	44789963	44794504
RNAP II total and Ser5P	Cd3e	uc009pez.1	chr9	44806825	44817673
RNAP II total and Ser5P	BC065403	uc009qpw.1	chr9	72256867	72257750
RNAP II total and Ser5P	Endogl1	uc009sba.1	chr9	119354077	119374635
RNAP II total and Ser5P	Hspa1a	uc008cep.1	chr17	35106303	35109101
RNAP II total and Ser5P	M11858	uc009bpz.1	chr6	41507696	41508364
RNAP II total and Ser5P	Btg2	uc007cre.1	chr1	135971441	135975732
no Peak	0610009D07Rik	uc007myi.1	chr12	4824413	4834465
no Peak	0610010E21Rik	uc009ged.1	chr7	31106427	31107394
no Peak	0610010F05Rik	uc007iff.1	chr11	23464960	23533631
no Peak	0610011L14Rik	uc008nnq.1	chr2	156373334	156394708
no Peak	0610037D15Rik	uc008uhf.1	chr4	116381175	116387709
no Peak	0610037P05Rik	uc007yhh.1	chr16	14299336	14317425
no Peak	0610038F07Rik	uc008gpt.1	chr19	10576129	10599699
no Peak	0910001A06Rik	uc007vzg.1	chr15	63760651	63892010
no Peak	1110002B05Rik	uc007nnt.1	chr12	55746360	55757559
no Peak	1110003E01Rik	uc008xnt.1	chr5	65839993	65884074
no Peak	1110004F10Rik	uc009jiw.1	chr7	123236854	123248724
no Peak	1110005A23Rik	uc007hoq.1	chr10	128258974	128285366
no Peak	1110012M11Rik	uc009mdt.1	chr8	74066828	74071925
no Peak	1110018G07Rik	uc007oga.1	chr12	86259098	86311815
no Peak	1110019J04Rik	uc008ssh.1	chr4	45118081	45120985
no Peak	1110020P15Rik	uc007hvb.1	chr11	4601970	4604347
no Peak	1110031B06Rik	uc007jds.1	chr11	59220651	59263458
no Peak	1110032A03Rik	uc009pkp.1	chr9	50570932	50576257
no Peak	1110032O16Rik	uc009jtl.1	chr7	134034494	134041792
no Peak	1110037F02Rik	uc008rzp.1	chr4	11413104	11478290
no Peak	1110049F12Rik	uc008vho.1	chr4	135531519	135543160
no Peak	1110054O05Rik	uc008tac.1	chr4	59782518	59796727
no Peak	1110059E24Rik	uc008gyz.1	chr19	21671802	21727281
no Peak	1110059G10Rik	uc009sfj.1	chr9	122854206	122860090
no Peak	1190005F20Rik	uc007cyv.1	chr1	153275777	153305289
no Peak	1200003I07Rik	uc009lxn.1	chr8	72229036	72240847
no Peak	1200004M23Rik	uc008gfn.1	chr19	5850973	5875208
no Peak	1200011I18Rik	uc007urd.1	chr14	76486038	76510622
no Peak	1200011M11Rik	uc007ktg.1	chr11	86891233	86900279
no Peak	1200016B10Rik	uc007cyq.1	chr1	153214828	153275511
no Peak	1300010F03Rik	uc007usq.1	chr14	79408970	79602115
no Peak	1500002O20Rik	uc009fpn.1	chr7	25184646	25207796
no Peak	1500010J02Rik	uc007jow.1	chr11	68829455	68849972
no Peak	1500012F01Rik	uc008nzf.1	chr2	166888433	166891362
no Peak	1500031L02Rik	uc007yyf.1	chr16	32099887	32108140
no Peak	1500032D16Rik	uc008bve.1	chr17	31657059	31668270
no Peak	1700010I14Rik	uc008ajx.1	chr17	9181225	9201183
no Peak	1700023B02Rik	uc008kck.2	chr2	73121928	73150649
no Peak	1700029F09Rik	uc007avz.1	chr1	44143654	44159268
no Peak	1700041B20Rik	uc008meu.1	chr2	126964510	126969178
no Peak	1700052N19Rik	uc007eha.1	chr10	5891400	5917244
no Peak	1700065O13Rik	uc008bxy.1	chr17	33153808	33170326
no Peak	1700081L11Rik	uc007lwn.1	chr11	104215889	104330748
no Peak	1700123O20Rik	uc007twy.1	chr14	55305052	55309578
no Peak	1810008A18Rik	uc007fvt.1	chr10	76949405	76978530
no Peak	1810013L24Rik	uc007yda.1	chr16	8830187	8859017
no Peak	1810020D17Rik	uc009ijj.1	chr7	104698850	104727925
no Peak	1810021J13Rik	uc009ouj.1	chr9	37015917	37030796
no Peak	1810026J23Rik	uc009omb.1	chr9	21397165	21400391
no Peak	1810030N24Rik	uc008sgm.1	chr4	34715920	34725608
no Peak	1810034K20Rik	uc007uaa.1	chr14	56276744	56279251
no Peak	1810044A24Rik	uc007wbl.1	chr15	72420049	72886240
no Peak	1810063B05Rik	uc009nyv.1	chr8	128946427	128949334
no Peak	1810063B07Rik	uc007siy.1	chr14	20894881	20902348
no Peak	1810073N04Rik	uc007mrv.1	chr11	119965284	120012588
no Peak	2010003J03Rik	uc008gct.1	chr19	5366812	5371511
no Peak	2010005J08Rik	uc007hwv.1	chr11	5613419	5662379
no Peak	2010015L04Rik	uc008wdk.1	chr4	154783366	154817219
no Peak	2010107H07Rik	uc007swr.1	chr14	31937691	31942116
no Peak	2010305A19Rik	uc008uaz.1	chr4	108000756	108013323
no Peak	2010317E24Rik	uc008irt.1	chr2	25227840	25232321
no Peak	2210009G21Rik	uc008mou.1	chr2	136716953	136895514
no Peak	2210021J22Rik	uc007xdl.1	chr15	85637401	85642089
no Peak	2210412D01Rik	uc009ied.1	chr7	91257868	91300403
no Peak	2310001A20Rik	uc008mud.1	chr2	150408816	150434259
no Peak	2310003C23Rik	uc008ojy.1	chr2	180444971	180453222
no Peak	2310004I24Rik	uc007jls.1	chr11	66851406	66866096
no Peak	2310005E10Rik	uc009bhb.1	chr6	34334246	34346949
no Peak	2310005N01Rik	uc008urt.1	chr4	124762390	124787313
no Peak	2310007F21Rik	uc009qbf.1	chr9	63450461	63489696
no Peak	2310008M10Rik	uc008rjc.1	chr3	130398836	130412336
no Peak	2310010M24Rik	uc008jpz.1	chr2	49643205	49804366
no Peak	2310016C08Rik	uc009bdd.1	chr6	29222671	29225442
no Peak	2310016M24Rik	uc007xqe.1	chr15	99556077	99558545
no Peak	2310022A10Rik	uc009fwo.1	chr7	28338329	28366196
no Peak	2310022M17Rik	uc007iim.1	chr11	31565149	31571862
no Peak	2310028O11Rik	uc008vlu.1	chr4	138659698	138686953
no Peak	2310035C23Rik	uc007cgk.1	chr1	107560489	107650652
no Peak	2310036O22Rik	uc009moy.1	chr8	87550731	87554185
no Peak	2310044H10Rik	uc009gpp.1	chr7	51745496	51751778
no Peak	2310047O13Rik	uc008ijn.1	chr2	12268890	12341087
no Peak	2310057M21Rik	uc009kbg.1	chr7	138486231	138506212
no Peak	2310061C15Rik	uc009nom.1	chr8	119412584	119445336
no Peak	2310065K24Rik	uc009mwo.1	chr8	97111223	97125579
no Peak	2410002F23Rik	uc009gos.1	chr7	51502095	51507686
no Peak	2410002O22Rik	uc007rsw.1	chr13	104963800	104968546
no Peak	2410004L22Rik	uc009mcg.1	chr8	73775023	73796275
no Peak	2410014A08Rik	uc008zdf.1	chr5	115595101	115608155
no Peak	2410017P07Rik	uc007eyb.1	chr10	41438651	41529674
no Peak	2410018C17Rik	uc008xat.1	chr5	33943001	33972004
no Peak	2410018G20Rik	uc007yhw.1	chr16	15848533	15863462
no Peak	2410042D21Rik	uc008lpa.1	chr2	112219367	112254394
no Peak	2410066E13Rik	uc009cad.1	chr6	54631765	54650400
no Peak	2410075B13Rik	uc007why.1	chr15	75811099	75812413
no Peak	2410089E03Rik	uc007vel.1	chr15	8119105	8152606
no Peak	2410127E18Rik	uc009bfe.1	chr6	30351908	30405174
no Peak	2410129H14Rik	uc007uuu.1	chr14	99433768	99445299
no Peak	2410187C16Rik	uc007vti.1	chr15	57972990	57990209
no Peak	2510002D24Rik	uc007yoo.1	chr16	18836672	18840206
no Peak	2510049I19Rik	uc009mfn.1	chr8	74743628	74747674
no Peak	2600005O03Rik	uc007vrw.1	chr15	54907655	54922033
no Peak	2600009E05Rik	uc008mjs.1	chr2	130479818	130490381
no Peak	2600011C06Rik	uc007odm.1	chr12	84992236	85024073
no Peak	2610001J05Rik	uc009ayt.1	chr6	13819073	13821466
no Peak	2610008E11Rik	uc007fyo.1	chr10	78527118	78560302
no Peak	2610016C23Rik	uc007eny.1	chr10	20067630	20081125
no Peak	2610018G03Rik	uc009tdr.1	chrX	48194612	48245027
no Peak	2610020H08Rik	uc009jlw.1	chr7	126937643	126992455
no Peak	2610021K21Rik	uc007osc.1	chr12	100955740	101121652
no Peak	2610024G14Rik	uc008xwc.1	chr5	77723275	77739083
no Peak	2610036D13Rik	uc008npk.1	chr2	157807538	157854169
no Peak	2610044O15Rik	uc008dwt.1	chr17	95214148	95233788
no Peak	2610101N10Rik	uc009rbb.1	chr9	95361395	95412415
no Peak	2610204K14Rik	uc009icl.1	chr7	88907838	88914376
no Peak	2610206B13Rik	uc007uxd.1	chr14	104901605	104921883
no Peak	2610209M04Rik	uc009csj.1	chr6	86625162	86634485
no Peak	2610301B20Rik	uc008ryv.1	chr4	10801754	10826570
no Peak	2610528K11Rik	uc008jib.1	chr2	33585475	33743466
no Peak	2610529C04Rik	uc009ubh.1	chrX	103165555	103207125
no Peak	2700019D07Rik	uc007euj.1	chr10	33638948	33671018
no Peak	2700049A03Rik	uc007nun.1	chr12	72237834	72344286
no Peak	2700049P18Rik	uc007cnk.1	chr1	133424565	133436449
no Peak	2700062C07Rik	uc008egt.1	chr18	24629371	24636268
no Peak	2700078E11Rik	uc008ibv.1	chr19	60603768	60656884
no Peak	2700094F01Rik	uc009bfh.1	chr6	30429056	30459706
no Peak	2700094K13Rik	uc008kiv.1	chr2	84509377	84510865
no Peak	2700097O09Rik	uc007nod.1	chr12	56146647	56181097
no Peak	2810021B07Rik	uc007poa.1	chr13	17787246	17790939
no Peak	2810022L02Rik	uc007bbd.1	chr1	57831771	58005238
no Peak	2810026P18Rik	uc009qys.1	chr9	88415890	88417725
no Peak	2810405J04Rik	uc008doq.1	chr17	75936425	75951286
no Peak	2810410M20Rik	uc008dny.1	chr17	74698826	74723284
no Peak	2810422O20Rik	uc007dhv.1	chr1	165925045	165927374
no Peak	2810432D09Rik	uc008sjh.1	chr4	41659066	41660535
no Peak	2810474O19Rik	uc009eud.1	chr6	149257952	149284178
no Peak	2810485I05Rik	uc009oef.1	chr9	13632170	13650966
no Peak	2900010J23Rik	uc008jet.1	chr2	32134336	32143533
no Peak	2900042B11Rik	uc008tzn.1	chr4	106926534	106952493
no Peak	2900057K09Rik	uc009img.1	chr7	107068766	107104041
no Peak	2900064A13Rik	uc008lpb.1	chr2	112295181	112307593
no Peak	3000004C01Rik	uc007lsy.1	chr11	102766842	102786406
no Peak	3110001A13Rik	uc008iek.1	chr2	3630729	3699406
no Peak	3110001D03Rik	uc008tjk.1	chr4	74923257	74924190
no Peak	3110003A17Rik	uc007ely.1	chr10	17731066	17743058
no Peak	3110005G23Rik	uc009lvb.1	chr8	67471083	67492932
no Peak	3110009E18Rik	uc007cjh.1	chr1	122017771	122084766
no Peak	3110031B13Rik	uc007rtm.1	chr13	105607318	105628739
no Peak	3110037I16Rik	uc008unt.1	chr4	120593806	120597610
no Peak	3110040N11Rik	uc009icm.1	chr7	88927072	88934339
no Peak	3110043O21Rik	uc008sgv.1	chr4	35138530	35173129
no Peak	3110052M02Rik	uc008ard.1	chr17	21787579	21801933
no Peak	3300001P08Rik	uc007kyh.1	chr11	94152452	94183225
no Peak	3830402I07Rik	uc007rbj.1	chr13	67773833	67784481
no Peak	3830406C13Rik	uc007sfo.1	chr14	13116722	13135745
no Peak	4631424J17Rik	uc007imv.1	chr11	43495507	43534980
no Peak	4631427C17Rik	uc009bei.1	chr6	29718532	29862309
no Peak	4632434I11Rik	uc009iih.1	chr7	100006036	100022742
no Peak	4732496O08Rik	uc008vqd.1	chr4	143002328	143010990
no Peak	4831426I19Rik	uc007oxs.1	chr12	106168158	106248019
no Peak	4833418A01Rik	uc008kae.1	chr2	70893908	70937196
no Peak	4833426J09Rik	uc009naw.1	chr8	107115367	107120749
no Peak	4833442J19Rik	uc009ety.1	chr6	149090118	149099692
no Peak	4921513D23Rik	uc007ygx.1	chr16	14141056	14163444
no Peak	4921524J17Rik	uc009mpv.1	chr8	87932657	87956730
no Peak	4930402H24Rik	uc008mjx.1	chr2	130533588	130665846
no Peak	4930422G04Rik	uc008rhf.1	chr3	127256406	127320934
no Peak	4930432O21Rik	uc008arm.1	chr17	22099724	22131330
no Peak	4930455C21Rik	uc007zfb.1	chr16	38498432	38522709
no Peak	4930471M23Rik	uc008wvs.1	chr5	30950335	30962102
no Peak	4930473A06Rik	uc008tlc.1	chr4	83171448	83510574
no Peak	4930534B04Rik	uc007okk.1	chr12	92236931	92622818
no Peak	4930535B03Rik	uc008qkx.1	chr3	95563795	95622876
no Peak	4930578N16Rik	uc008jyo.1	chr2	69596113	69627543
no Peak	4930579G24Rik	uc008pnu.1	chr3	79433019	79436741
no Peak	4932432K03Rik	uc007tjz.1	chr14	49686223	49707398
no Peak	4932442K08Rik	uc008aoj.1	chr17	15533209	15570545
no Peak	4933407H18Rik	uc008xas.1	chr5	33721344	33765154
no Peak	4933407N01Rik	uc007iic.1	chr11	30829783	30854131
no Peak	4933411K20Rik	uc009lpw.1	chr8	47249042	47280944
no Peak	4933421E11Rik	uc008qwh.1	chr3	106487904	106539494
no Peak	4933424B01Rik	uc009esb.1	chr6	146498153	146526357
no Peak	4933426I21Rik	uc009fxd.1	chr7	28592214	28603811
no Peak	4933437K13Rik	uc007yfj.1	chr16	11405740	11755565
no Peak	4933439F18Rik	uc007jfw.1	chr11	60230804	60258779
no Peak	5033414D02Rik	uc008hdg.1	chr19	29423166	29436361
no Peak	5133401N09Rik	uc007qth.1	chr13	58259014	58266052
no Peak	5430411K18Rik	uc008fsa.1	chr18	78172575	78231752
no Peak	5430432M24Rik	uc008ner.1	chr2	151795133	151799702
no Peak	5630401D24Rik	uc007dgh.1	chr1	164463802	164478476
no Peak	5730403M16Rik	uc009fci.1	chr7	7067403	7074163
no Peak	5730437N04Rik	uc008afa.1	chr17	5410863	5440260
no Peak	5730449L18Rik	uc007czf.1	chr1	154217868	154233812
no Peak	5730455P16Rik	uc007klv.1	chr11	80174700	80191498
no Peak	5730494N06Rik	uc008mmk.1	chr2	132065229	132073518
no Peak	5730536A07Rik	uc009qel.1	chr9	65974417	65986775
no Peak	5730596K20Rik	uc008glg.1	chr19	7569066	7609674
no Peak	5730601F06Rik	uc009oiv.1	chr9	20304119	20325861
no Peak	5830405N20Rik	uc007hrk.1	chr10	129759932	129801167
no Peak	5830415F09Rik	uc008stp.1	chr4	46389846	46402295
no Peak	5830417C01Rik	uc007dux.1	chr1	180117547	180182728
no Peak	5830433M19Rik	uc008tsa.1	chr4	94166771	94223475
no Peak	5830482F20Rik	uc009fzw.1	chr7	29573995	29583980
no Peak	6030490I01Rik	uc008bxo.1	chr17	32954148	32967193
no Peak	6230416J20Rik	uc008tlx.1	chr4	86227188	86257926
no Peak	6230424H07Rik	uc007fdf.1	chr10	57960695	58038989
no Peak	6330406I15Rik	uc009apt.1	chr5	150214380	150234278
no Peak	6330407G11Rik	uc008upv.1	chr4	123412437	123427542
no Peak	6330500D04Rik	uc007pwe.1	chr13	24730516	24825675
no Peak	6330569M22Rik	uc008qxg.1	chr3	107415449	107434593
no Peak	6430598A04Rik	uc009adr.1	chr5	138172190	138182835
no Peak	6720456B07Rik	uc009dgz.1	chr6	113554765	113566945
no Peak	8030462N17Rik	uc008fro.1	chr18	77872019	77953225
no Peak	8430410K20Rik	uc009obm.1	chr9	4376561	4386869
no Peak	9030612M13Rik	uc008bxm.1	chr17	32902441	32925232
no Peak	9130011E15Rik	uc008hrv.1	chr19	45892633	46072978
no Peak	9130011J15Rik	uc009mgh.1	chr8	75089096	75094947
no Peak	9130017C17Rik	uc009mrp.1	chr8	91150726	91160027
no Peak	9130023D20Rik	uc007rwo.1	chr13	113450983	113523106
no Peak	9430015G10Rik	uc008wgd.1	chr4	155484097	155501372
no Peak	9430016H08Rik	uc007bbc.1	chr1	57463171	57474796
no Peak	9530048O09Rik	uc008uhy.1	chr4	116792483	116793880
no Peak	9630025I21Rik	uc007raw.1	chr13	67572448	67585189
no Peak	9630058J23Rik	uc007dvo.1	chr1	181476659	181557604
no Peak	9930104L06Rik	uc008url.1	chr4	124614291	124621905
no Peak	A030007L17Rik	uc009cah.1	chr6	54935088	54942861
no Peak	A230062G08Rik	uc008xvi.1	chr5	77304962	77334525
no Peak	A430033K04Rik	uc009afu.1	chr5	139064121	139089984
no Peak	A430041B07Rik	uc007nqt.1	chr12	66066790	66123560
no Peak	A430093A21Rik	uc007bfr.1	chr1	63108609	63160884
no Peak	A430107D22Rik	uc008bww.1	chr17	32535744	32540526
no Peak	A630001G21Rik	uc007buk.1	chr1	87614266	87675218
no Peak	A630007B06Rik	uc008hzh.1	chr19	56882467	56896671
no Peak	A630033H20Rik	uc009ucc.1	chrX	104344955	104368057
no Peak	A830007P12Rik	uc008iql.1	chr2	25048239	25052133
no Peak	A830023I12Rik	uc008yps.1	chr5	110539110	110556691
no Peak	A930001N09Rik	uc008bel.1	chr17	26852594	26909832
no Peak	A930008G19Rik	uc009kcj.1	chr7	139903766	140005569
no Peak	A930016P21Rik	uc007vkl.1	chr15	31531870	31547290
no Peak	AA407270	uc009qpa.1	chr9	71352153	71440167
no Peak	AA408296	uc007edw.1	chr1	194930596	194956445
no Peak	AA881470	uc009aic.1	chr5	141180976	141195288
no Peak	Aadacl1	uc008otl.1	chr3	27081925	27143833
no Peak	Aak1	uc009css.1	chr6	86799510	86953221
no Peak	Aasdhppt	uc009obi.1	chr9	4295092	4309471
no Peak	Aatf	uc007kqm.1	chr11	84236357	84327003
no Peak	Abcb7	uc009uaf.1	chrX	101478958	101609182
no Peak	Abcc5	uc007ypp.1	chr16	20331376	20426467
no Peak	Abcd1	uc009tml.1	chrX	70961935	70983626
no Peak	Abce1	uc009mit.1	chr8	82207340	82235639
no Peak	Abcf2	uc008wsb.1	chr5	24071162	24083177
no Peak	Abcf3	uc007ypz.1	chr16	20548675	20561676
no Peak	Abcg1	uc008buj.1	chr17	31194685	31252719
no Peak	Abcg3	uc008ykt.1	chr5	105364075	105411736
no Peak	Abhd13	uc009kum.1	chr8	9977716	9992154
no Peak	Abhd8	uc009mdf.1	chr8	73980604	73987545
no Peak	Abl2	uc007dcl.1	chr1	158489179	158579750
no Peak	Ablim1	uc008hzr.2	chr19	57107753	57290522
no Peak	Abt1	uc007pto.1	chr13	23510229	23515735
no Peak	Acaa1a	uc009sas.1	chr9	119250411	119259413
no Peak	Acaa2	uc008fpt.1	chr18	74938865	74965861
no Peak	Acadl	uc007bir.1	chr1	66877426	66909841
no Peak	Acads	uc008zdb.1	chr5	115560307	115569322
no Peak	Acat2	uc008alq.1	chr17	13135907	13153591
no Peak	Acly	uc007llm.1	chr11	100337669	100389215
no Peak	Acn9	uc009axa.1	chr6	6906017	6989220
no Peak	Aco1	uc008shd.1	chr4	40090297	40146042
no Peak	Acot2	uc007oea.1	chr12	85328839	85334825
no Peak	Acot9	uc009urt.1	chrX	151697042	151732050
no Peak	Acp6	uc008qoq.1	chr3	96962713	96980491
no Peak	Acsl4	uc009ulu.1	chrX	138752535	138825078
no Peak	Acss1	uc008muf.1	chr2	150443846	150493965
no Peak	Actn1	uc007oap.1	chr12	81268533	81361303
no Peak	Actr10	uc007nty.1	chr12	72038893	72063269
no Peak	Actr2	uc007ics.1	chr11	19962306	20012916
no Peak	Actr5	uc008nqm.1	chr2	158450648	158464947
no Peak	Actr6	uc007gss.1	chr10	89174717	89195040
no Peak	Adal	uc008lxp.1	chr2	120966163	120982414
no Peak	Adam10	uc009qor.1	chr9	70526807	70628036
no Peak	Adamts6	uc007rtg.1	chr13	105077914	105284843
no Peak	Adfp	uc008tlz.1	chr4	86302468	86315963
no Peak	Adi1	uc007nfv.1	chr12	29360071	29367039
no Peak	Adipor1	uc007crx.1	chr1	136312043	136328918
no Peak	Adk	uc007sld.1	chr14	21871854	22267768
no Peak	Adnp	uc008oar.1	chr2	168006464	168055879
no Peak	Adpgk	uc009pxp.1	chr9	59139378	59164007
no Peak	Adrb2	uc008fcy.1	chr18	62337469	62339613
no Peak	Afap1	uc008xej.1	chr5	36235967	36346571
no Peak	Aff1	uc008yjt.1	chr5	104183180	104284341
no Peak	Aff3	uc007asv.1	chr1	38392275	38721800
no Peak	Aftph	uc007idh.1	chr11	20585087	20641487
no Peak	Aga	uc009lrz.1	chr8	54597079	54608776
no Peak	Aggf1	uc007rmi.1	chr13	96120671	96145289
no Peak	Agl	uc008rcq.1	chr3	116442916	116511084
no Peak	Agpat3	uc007fxq.1	chr10	77734307	77814445
no Peak	Agpat4	uc008akm.1	chr17	12312149	12412506
no Peak	Agpat5	uc009kzv.1	chr8	18846278	18884413
no Peak	Agps	uc008ket.1	chr2	75670248	75767706
no Peak	Agtrap	uc008vtz.1	chr4	147451169	147462173
no Peak	Ahctf1	uc007dvr.1	chr1	181676221	181733791
no Peak	Ahcy	uc008nka.1	chr2	154885047	154900162
no Peak	Ahdc1	uc008vcd.1	chr4	132567420	132634025
no Peak	Ahr	uc007nji.1	chr12	36182650	36219661
no Peak	Ahsa1	uc007oit.1	chr12	88607677	88614902
no Peak	AI449175	uc009lxh.1	chr8	72134552	72149447
no Peak	AI450540	uc008iac.1	chr19	57435169	57464076
no Peak	AI462493	uc008gnr.1	chr19	8954506	8955413
no Peak	AI467606	uc009juf.1	chr7	134234949	134237563
no Peak	AI597479	uc007avj.1	chr1	43155554	43172791
no Peak	AI848100	uc007dfu.1	chr1	163768884	163806729
no Peak	AI894139	uc009btr.1	chr6	47903445	47915296
no Peak	AI987944	uc009gll.1	chr7	48628299	48648630
no Peak	Aig1	uc007elb.1	chr10	13366860	13588636
no Peak	AK005116	uc007jkq.1	chr11	63892985	63896758
no Peak	AK005305	uc007yrp.1	chr16	21794419	21809110
no Peak	AK007998	uc007jad.1	chr11	57609000	57614919
no Peak	AK010870	uc008nhr.1	chr2	153166892	153171457
no Peak	AK012387	uc009elc.1	chr6	134879109	134901588
no Peak	AK015179	uc009qyu.1	chr9	88442857	88463688
no Peak	AK015392	uc008nwo.1	chr2	164703586	164705276
no Peak	AK016693	uc009jia.1	chr7	121458994	121558675
no Peak	AK017316	uc008yhl.1	chr5	100849860	100858535
no Peak	AK019388	uc007qtf.1	chr13	58227240	58228749
no Peak	AK019536	uc007rab.1	chr13	67140519	67162085
no Peak	AK021038	uc007hgi.1	chr10	122382139	122382819
no Peak	AK029576	uc008evq.1	chr18	46745592	46757168
no Peak	AK030376	uc009eff.1	chr6	129158429	129188000
no Peak	AK030920	uc007jeg.1	chr11	59319163	59327149
no Peak	AK037419	uc008ymt.1	chr5	108127230	108132499
no Peak	AK038087	uc008qwo.1	chr3	106737299	106894720
no Peak	AK038602	uc007zxm.1	chr16	91465348	91470366
no Peak	AK039829	uc007nsk.1	chr12	70565773	70576534
no Peak	AK040357	uc009qpv.1	chr9	72250994	72251896
no Peak	AK040426	uc008acg.1	chr16	96122043	96123333
no Peak	AK041795	uc007iag.1	chr11	11457423	11479463
no Peak	AK042016	uc009hxj.1	chr7	85732264	85882898
no Peak	AK045413	uc007gjp.1	chr10	82082600	82085834
no Peak	AK045643	uc008iab.1	chr19	57397682	57435265
no Peak	AK050169	uc009eua.1	chr6	149106098	149137204
no Peak	AK079377	uc009aox.1	chr5	149765323	149771786
no Peak	AK079857	uc007kol.1	chr11	83037951	83040080
no Peak	AK079939	uc008zmw.1	chr5	123439362	123448348
no Peak	AK082625	uc007qfc.1	chr13	41345228	41371943
no Peak	AK084809	uc007ein.1	chr10	7511187	7512622
no Peak	AK122209	uc009nwy.1	chr8	126547359	126572404
no Peak	AK122525	uc007ezj.1	chr10	43198945	43235214
no Peak	AK135410	uc007lsc.1	chr11	102397408	102417462
no Peak	AK137251	uc007gjk.1	chr10	81590757	81615736
no Peak	AK137397	uc009pvz.1	chr9	57845847	57855258
no Peak	AK138849	uc009apr.1	chr5	150170210	150196171
no Peak	AK141411	uc008nws.1	chr2	164736853	164745453
no Peak	AK145489	uc008hmd.1	chr19	41650356	41660869
no Peak	AK147911	uc009rhk.1	chr9	104102766	104165262
no Peak	AK148054	uc008gfk.1	chr19	5842306	5845476
no Peak	AK151508	uc007zky.1	chr16	50719409	50732856
no Peak	AK157499	uc007zlq.1	chr16	55843317	55895398
no Peak	AK160548	uc007hyu.1	chr11	6425621	6428763
no Peak	AK162670	uc009lxo.1	chr8	72265537	72273861
no Peak	AK188320	uc008imj.1	chr2	19580472	19581174
no Peak	Ak2	uc008uvu.1	chr4	128670508	128688773
no Peak	Akap10	uc007jii.1	chr11	61684808	61743728
no Peak	Akap12	uc007ehi.1	chr10	5987069	6080163
no Peak	Akap13	uc009hww.1	chr7	82846877	82881525
no Peak	Akap1	uc007kvw.1	chr11	88692105	88725900
no Peak	Akap2	uc008syi.1	chr4	57754966	57909856
no Peak	Akr1a4	uc008uha.1	chr4	116309114	116324256
no Peak	Akr1b3	uc009bgy.1	chr6	34253933	34267471
no Peak	Akt2	uc009fwr.1	chr7	28376578	28424469
no Peak	Aldh18a1	uc008hkw.1	chr19	40624746	40662859
no Peak	Aldh2	uc008zjt.1	chr5	122017695	122043833
no Peak	Aldh3a2	uc007jhf.1	chr11	61058256	61080629
no Peak	Aldh7a1	uc008eyo.1	chr18	56685389	56732526
no Peak	Aldoa	uc009jsv.1	chr7	133938749	133943893
no Peak	Alg11	uc009lcl.1	chr8	23171191	23178761
no Peak	Alg2	uc008suq.1	chr4	47482705	47487197
no Peak	Alg8	uc009ijc.1	chr7	104520137	104540665
no Peak	Alkbh1	uc007oiy.1	chr12	88769027	88784789
no Peak	Alkbh3	uc008lgn.1	chr2	93820790	93850887
no Peak	Alkbh4	uc009aaa.1	chr5	136612023	136617484
no Peak	Alkbh8	uc009oat.1	chr9	3335230	3385846
no Peak	Als2cl	uc009rvc.1	chr9	110782677	110803028
no Peak	Amd2	uc007ews.1	chr10	40007263	40021978
no Peak	Ampd1	uc008qsp.1	chr3	102877936	102903643
no Peak	Anapc10	uc009miv.1	chr8	82235718	82301220
no Peak	Anapc13	uc009rft.1	chr9	102528660	102536571
no Peak	Anapc1	uc008mgq.1	chr2	128438441	128513116
no Peak	Anapc4	uc008xkx.1	chr5	53225373	53257973
no Peak	Anapc5	uc008zmf.1	chr5	123237469	123271348
no Peak	Angpt1	uc007vpc.1	chr15	42256270	42508341
no Peak	Angptl4	uc008bzp.1	chr17	33911844	33918451
no Peak	Ankfy1	uc007jzh.1	chr11	72503503	72585648
no Peak	Ankhd1	uc008enr.1	chr18	36720399	36794459
no Peak	Ankmy2	uc007njt.1	chr12	36883776	36923878
no Peak	Ankrd10	uc009kvp.1	chr8	11611582	11635689
no Peak	Ankrd12	uc008dgs.1	chr17	66316840	66426386
no Peak	Ankrd26	uc009dlr.1	chr6	118452581	118512274
no Peak	Ankrd28	uc007sya.1	chr14	32513200	32643601
no Peak	Ankrd41	uc009mdc.1	chr8	73929914	73933803
no Peak	Ankrd44	uc007azs.1	chr1	54702183	54983202
no Peak	Ankrd49	uc009oez.1	chr9	14584639	14589005
no Peak	Anln	uc009ook.1	chr9	22136457	22193632
no Peak	Anp32a	uc009qah.1	chr9	62189234	62226609
no Peak	Anp32e	uc008qlu.1	chr3	95733213	95750899
no Peak	Antxr2	uc008yga.1	chr5	98313706	98459981
no Peak	Anxa2	uc009qng.1	chr9	69301489	69339592
no Peak	Anxa5	uc008ozj.1	chr3	36347846	36374620
no Peak	Anxa7	uc007sjs.1	chr14	21274498	21299163
no Peak	Ap1m1	uc009mfp.1	chr8	74764030	74781278
no Peak	Ap3b1	uc007rlv.1	chr13	95128985	95336270
no Peak	Ap3m2	uc009ldz.1	chr8	23897826	23916099
no Peak	Ap3s1	uc008evv.1	chr18	46901570	46950480
no Peak	Ap3s2	uc009hzf.1	chr7	87020210	87065487
no Peak	Ap4b1	uc008qtq.1	chr3	103613442	103625946
no Peak	Ap4s1	uc007nmw.1	chr12	52792023	52839920
no Peak	Apaf1	uc007gtg.1	chr10	90452055	90545488
no Peak	Apbb1ip	uc008ino.1	chr2	22629951	22730890
no Peak	Apc	uc008eke.1	chr18	34380637	34479735
no Peak	Apip	uc008lin.1	chr2	102913831	102932776
no Peak	Aplp2	uc009orl.1	chr9	30957141	31019400
no Peak	Apobec1	uc009dpk.1	chr6	122527809	122552462
no Peak	Apobec3	uc007wut.1	chr15	79722887	79738516
no Peak	Apool	uc009udh.1	chrX	109425016	109486039
no Peak	Appbp2	uc007krj.1	chr11	85004811	85048622
no Peak	Appl1	uc007sth.1	chr14	27732173	27783737
no Peak	Aptx	uc008shp.1	chr4	40629110	40650220
no Peak	Aqr	uc008lqd.1	chr2	113926908	114001055
no Peak	Arc	uc007wfn.1	chr15	74499512	74503000
no Peak	Arf2	uc007lvx.1	chr11	103828078	103846650
no Peak	Arf4	uc007sta.1	chr14	27457682	27476744
no Peak	Arfgap1	uc008okj.1	chr2	180701973	180717147
no Peak	Arfgef2	uc008nyr.1	chr2	166631087	166723551
no Peak	Arfip1	uc008pqg.1	chr3	84299985	85691315
no Peak	Arhgap10	uc009mhm.1	chr8	79774264	80041806
no Peak	Arhgap12	uc008dzc.1	chr18	6024447	6136096
no Peak	Arhgap15	uc008jox.1	chr2	43604343	44243143
no Peak	Arhgap18	uc007ese.1	chr10	26492317	26638454
no Peak	Arhgap19	uc008hmh.1	chr19	41844074	41876524
no Peak	Arhgap24	uc008yiw.1	chr5	102910409	103326848
no Peak	Arhgap25	uc009ctm.1	chr6	87409378	87483229
no Peak	Arhgap27	uc007lud.1	chr11	103192813	103206016
no Peak	Arhgdia	uc007mtk.1	chr11	120438548	120442916
no Peak	Arhgef2	uc008pvv.1	chr3	88420064	88450836
no Peak	Arhgef3	uc007sto.1	chr14	27928084	28217090
no Peak	Arhgef6	uc009thd.1	chrX	54484663	54591906
no Peak	Arid1b	uc008aey.1	chr17	4995073	5347656
no Peak	Arid4a	uc007nud.1	chr12	72116953	72200338
no Peak	Arid4b	uc007pmz.1	chr13	14156058	14291870
no Peak	Arid5a	uc007apw.1	chr1	36364598	36379820
no Peak	Arih1	uc009pxs.1	chr9	59240402	59334090
no Peak	Arl13b	uc007zpu.1	chr16	62793514	62846823
no Peak	Arl15	uc007rxk.1	chr13	114584715	114947669
no Peak	Arl3	uc008htt.1	chr19	46605598	46647575
no Peak	Arl4a	uc007nkr.1	chr12	40732033	40763963
no Peak	Arl4c	uc007byt.1	chr1	90594800	90598766
no Peak	Arl4d	uc007lpq.2	chr11	101526854	101529146
no Peak	Arl5a	uc008jqy.1	chr2	52253470	52280394
no Peak	Arl5c	uc007lfd.1	chr11	97850893	97857487
no Peak	Arl6ip5	uc009dar.1	chr6	97160785	97183309
no Peak	Arl6ip6	uc008jrn.1	chr2	53050465	53078060
no Peak	Armc1	uc008oro.1	chr3	19032143	19063065
no Peak	Armc8	uc009ref.1	chr9	99380513	99469318
no Peak	Armcx1	uc009ugj.1	chrX	131252527	131256451
no Peak	Armcx6	uc009ugn.1	chrX	131282993	131285951
no Peak	Arpc2	uc007bln.1	chr1	74283091	74314787
no Peak	Arpc3	uc008zlf.1	chr5	122841936	122856187
no Peak	Arrb1	uc009ilu.1	chr7	106683995	106755281
no Peak	Arrb2	uc007jut.1	chr11	70246154	70254330
no Peak	Arrdc2	uc009mbt.1	chr8	73359036	73363619
no Peak	Arsa	uc007xgy.1	chr15	89302926	89307856
no Peak	Art4	uc009emk.1	chr6	136796971	136806121
no Peak	Asb3	uc007iig.1	chr11	30854397	31002704
no Peak	Ascc1	uc007feh.1	chr10	59465586	59562734
no Peak	Ash1l	uc008pxj.1	chr3	88769733	88883297
no Peak	Asna1	uc009mox.1	chr8	87541829	87549177
no Peak	Asxl2	uc007mwq.1	chr12	3426883	3506849
no Peak	Atad1	uc008hfo.1	chr19	32747052	32786788
no Peak	Atad2b	uc007myu.1	chr12	4924158	5054216
no Peak	Atad2	uc007vtf.1	chr15	57925601	57966637
no Peak	Atf1	uc007xqs.1	chr15	100058289	100091679
no Peak	Atf2	uc008kde.1	chr2	73654578	73730685
no Peak	Atf5	uc009gqv.1	chr7	52067627	52071942
no Peak	Atf7ip	uc009elw.1	chr6	136481470	136536204
no Peak	Atg10	uc007rjr.1	chr13	91074953	91363592
no Peak	Atg12	uc008evu.1	chr18	46892070	46901233
no Peak	Atg16l2	uc009iof.1	chr7	108437905	108450590
no Peak	Atg2b	uc007oyp.1	chr12	106851748	106923451
no Peak	Atg3	uc007zii.1	chr16	45158941	45188651
no Peak	Atg5	uc007ezt.1	chr10	43988163	44084097
no Peak	Atox1	uc007izj.1	chr11	55260144	55274640
no Peak	Atp10a	uc009hef.1	chr7	65913701	66084161
no Peak	Atp11c	uc009tia.1	chrX	57476466	57657156
no Peak	Atp1a1	uc008qrj.1	chr3	101380145	101408580
no Peak	Atp1b3	uc009rck.1	chr9	96233094	96264718
no Peak	Atp2a3	uc007jzo.1	chr11	72774756	72806541
no Peak	Atp5c1	uc008ihn.1	chr2	9977660	10002071
no Peak	Atp5f1	uc008qvm.1	chr3	105745780	105763166
no Peak	Atp5j	uc007zti.1	chr16	84828115	84835819
no Peak	Atp5o	uc007zys.1	chr16	91925467	91931875
no Peak	Atp6ap2	uc009sqx.1	chrX	12164995	12194091
no Peak	Atp6v0e	uc008bei.1	chr17	26813340	26836591
no Peak	Atp6v1a	uc007zgu.1	chr16	44085516	44139132
no Peak	Atp6v1c1	uc007vnv.1	chr15	38591708	38621638
no Peak	Atp6v1d	uc007nzj.1	chr12	79943968	79962625
no Peak	Atp6v1g1	uc008tgq.1	chr4	63205870	63211735
no Peak	Atp6v1h	uc007afn.1	chr1	5073253	5152630
no Peak	Atp7a	uc009ubm.1	chrX	103222655	103320256
no Peak	Atp8a1	uc008xqa.1	chr5	68009379	68238670
no Peak	Atp8b2	uc008qai.1	chr3	89743402	89767430
no Peak	Atpaf2	uc007jfv.1	chr11	60214131	60230507
no Peak	Atpbd3	uc009gnh.1	chr7	50927400	50933667
no Peak	Atpif1	uc008vbl.1	chr4	132086474	132089850
no Peak	Atrnl1	uc008iai.1	chr19	57685534	58207830
no Peak	Atrx	uc009ube.1	chrX	103069898	103124709
no Peak	Atxn10	uc007xdd.1	chr15	85166810	85294266
no Peak	Atxn7l1	uc007nir.1	chr12	34000282	34057222
no Peak	AU022252	uc008uln.1	chr4	118894526	118905311
no Peak	Auh	uc007qnd.1	chr13	52930478	53025046
no Peak	Aurkaip1	uc008wey.1	chr4	155205754	155207168
no Peak	Aurkb	uc007jpa.1	chr11	68859144	68865164
no Peak	AV312086	uc008gth.1	chr19	11986925	12019456
no Peak	AW146154	uc009glq.1	chr7	48734243	48755260
no Peak	AW146242	uc009cco.1	chr6	57702257	57775119
no Peak	AW549877	uc007vch.1	chr15	3932034	3945752
no Peak	AW554918	uc008ehi.1	chr18	25392415	25625816
no Peak	AY078069	uc009gei.1	chr7	31206750	31213765
no Peak	B230118H07Rik	uc008lhi.1	chr2	101400937	101489689
no Peak	B230219D22Rik	uc007qrx.1	chr13	55794484	55804861
no Peak	B230380D07Rik	uc009qon.1	chr9	70446820	70504981
no Peak	B3bp	uc008xoa.1	chr5	66154759	66218023
no Peak	B3gnt2	uc007iej.1	chr11	22734746	22856692
no Peak	B4galt1	uc008shw.1	chr4	40751634	40801031
no Peak	B630005N14Rik	uc009ayp.1	chr6	13575936	13627966
no Peak	Bag1	uc008shz.1	chr4	40883449	40895270
no Peak	Banf1	uc008gcs.1	chr19	5364639	5366645
no Peak	Banp	uc009nsg.1	chr8	124474446	124549969
no Peak	Bat2d	uc007dgr.1	chr1	164601915	164670687
no Peak	Bat3	uc008cgd.1	chr17	35272430	35279550
no Peak	Batf	uc007ohd.1	chr12	87027669	87050037
no Peak	Baz2b	uc008jtr.1	chr2	59737419	59963867
no Peak	Bbs9	uc009oos.1	chr9	22280158	22692724
no Peak	Bbx	uc007zko.1	chr16	50197274	50432494
no Peak	BC002199	uc008rhp.1	chr3	127510182	127540410
no Peak	BC003267	uc009ktz.1	chr8	4613169	4630231
no Peak	BC003331	uc007cxz.1	chr1	152208440	152240185
no Peak	BC003885	uc009qra.1	chr9	72961275	72971140
no Peak	BC005537	uc007pwi.1	chr13	24893525	24904768
no Peak	BC006779	uc008oln.1	chr2	180962319	180976732
no Peak	BC011248	uc008ctu.1	chr17	46804404	46811204
no Peak	BC011426	uc008dag.1	chr17	56031515	56038353
no Peak	BC012278	uc007rfh.1	chr13	74617504	74631398
no Peak	BC020077	uc008tuz.1	chr4	99496190	99585388
no Peak	BC021381	uc007qrq.1	chr13	55640679	55672481
no Peak	BC025054	uc007pyi.1	chr13	28551902	28975446
no Peak	BC027344	uc009gcg.1	chr7	30628954	30638667
no Peak	BC031181	uc008fpx.1	chr18	75165521	75169587
no Peak	BC031353	uc009qrj.1	chr9	74800788	74879892
no Peak	BC031781	uc007dwt.1	chr1	182781281	182798245
no Peak	BC033915	uc009pgz.1	chr9	45820960	46031225
no Peak	BC034735	uc007srt.1	chr14	26531129	26539278
no Peak	BC035044	uc009eet.1	chr6	128798061	128841142
no Peak	BC037393	uc009aug.1	chr5	151450786	151468152
no Peak	BC038286	uc007bnu.1	chr1	75139359	75144483
no Peak	BC039093	uc008uvn.1	chr4	128450328	128483356
no Peak	BC043934	uc009rcl.1	chr9	96336222	96338557
no Peak	BC049349	uc009mfc.1	chr8	74474979	74493825
no Peak	BC050092	uc009ooh.1	chr9	22051873	22064339
no Peak	BC050868	uc008oty.1	chr3	28162135	28569507
no Peak	BC052328	uc007vjt.1	chr15	27586024	27611253
no Peak	BC054406	uc007ibq.1	chr11	16835157	16851121
no Peak	BC057022	uc008yzt.1	chr5	115018259	115063227
no Peak	BC057627	uc009fhs.1	chr7	16986599	17005729
no Peak	BC063263	uc009gmb.1	chr7	49729082	49761096
no Peak	BC080687	uc009mey.1	chr8	74432547	74440221
no Peak	BC088983	uc009lsp.1	chr8	59010318	59029363
no Peak	BC099568	uc009qqk.1	chr9	72827532	72833166
no Peak	Bcap31	uc009tmj.1	chrX	70931521	70961514
no Peak	Bcas2	uc008qsu.1	chr3	102975633	102983077
no Peak	Bcat2	uc009gwd.1	chr7	52825732	52845078
no Peak	Bcl2l11	uc008mgk.1	chr2	127951773	127988283
no Peak	Bcl2	uc007cgw.1	chr1	108434755	108610867
no Peak	Bcl7b	uc008zxw.1	chr5	135644361	135657715
no Peak	Bcor	uc009squ.1	chrX	11613863	11737481
no Peak	Bdh1	uc007yxi.1	chr16	31422379	31457583
no Peak	Bdp1	uc007rqc.1	chr13	100787948	100874025
no Peak	Bet1l	uc009kii.1	chr7	148039309	148042166
no Peak	Bet1	uc009avk.1	chr6	4026903	4036927
no Peak	Bfar	uc007ygf.1	chr16	13671958	13703705
no Peak	Bicd2	uc007qjg.1	chr13	49436917	49482394
no Peak	Birc2	uc009ocz.1	chr9	7818226	7835255
no Peak	Birc3	uc009odb.1	chr9	7848700	7873024
no Peak	Birc5	uc007mod.1	chr11	117710550	117717057
no Peak	Birc6	uc008doe.1	chr17	74927634	75103113
no Peak	Blm	uc009iax.1	chr7	87599976	87679996
no Peak	Bmf	uc008lsc.1	chr2	118354492	118375414
no Peak	Bmp2k	uc008yfo.1	chr5	97426707	97498668
no Peak	Bms1	uc009dlo.1	chr6	118333398	118369435
no Peak	Bnip3l	uc007ukt.1	chr14	67604076	67627661
no Peak	Bpgm	uc009bhg.1	chr6	34426355	34455610
no Peak	Bptf	uc007mac.1	chr11	106894394	106993236
no Peak	Brca1	uc007lpd.1	chr11	101350077	101413187
no Peak	Brcc3	uc009tpy.1	chrX	72662038	72699336
no Peak	Brd4	uc008bwc.1	chr17	32343613	32421054
no Peak	Bre	uc008wyz.1	chr5	32000422	32133589
no Peak	Brf1	uc007pfn.1	chr12	114198072	114238832
no Peak	Brip1	uc007ksf.1	chr11	85871639	86014695
no Peak	Brpf3	uc008brp.1	chr17	28938070	28975734
no Peak	Brwd3	uc009ucm.1	chrX	105937546	106029694
no Peak	Bst2	uc009mdr.1	chr8	74058160	74061336
no Peak	Btaf1	uc008hhw.1	chr19	37000568	37088547
no Peak	Btbd12	uc007xzg.1	chr16	3979122	4001680
no Peak	Btbd7	uc007ouq.1	chr12	104022857	104116616
no Peak	Btbd9	uc008btt.1	chr17	30354485	30713114
no Peak	Btd	uc007sxy.1	chr14	32454250	32481369
no Peak	Btrc	uc008hqy.1	chr19	45438240	45604503
no Peak	Bub1b	uc008lse.1	chr2	118423991	118467327
no Peak	Bub1	uc008mgd.1	chr2	127626856	127657533
no Peak	Bub3	uc009kbq.1	chr7	138703904	138715412
no Peak	Bud13	uc009phj.1	chr9	46091094	46106866
no Peak	Bxdc1	uc007ewp.1	chr10	39943051	39966845
no Peak	Bxdc2	uc007vgg.1	chr15	10404533	10415692
no Peak	Bzw1	uc007bbq.1	chr1	58449940	58463392
no Peak	C130039O16Rik	uc007oem.1	chr12	85493408	85559831
no Peak	C1d	uc007ice.1	chr11	17157620	17169179
no Peak	C1galt1c1	uc009tag.1	chrX	35983967	35988286
no Peak	C1galt1	uc009axg.1	chr6	7795332	7822047
no Peak	C330002I19Rik	uc007nfc.1	chr12	25677074	25748010
no Peak	C330011K17Rik	uc007rav.1	chr13	67541369	67552547
no Peak	C330016O10Rik	uc007iue.1	chr11	51456590	51464575
no Peak	C430048L16Rik	uc008sak.1	chr4	12016516	12023418
no Peak	C530044N13Rik	uc007yfm.1	chr16	11803813	11909516
no Peak	C80913	uc009gkq.1	chr7	38745020	38808570
no Peak	Cab39l	uc007uek.1	chr14	60059801	60167740
no Peak	Cad	uc008wwz.1	chr5	31357183	31380852
no Peak	Calcoco1	uc007xws.1	chr15	102537209	102552500
no Peak	Calcrl	uc008kii.1	chr2	84172889	84265424
no Peak	Calm1	uc007osq.1	chr12	101437750	101448016
no Peak	Calm3	uc009fin.1	chr7	17500727	17509381
no Peak	Camk1d	uc008ifp.1	chr2	5214502	5635710
no Peak	Camk4	uc008ejq.1	chr18	33099011	33346580
no Peak	Camkk1	uc007jzt.1	chr11	72832509	72855567
no Peak	Camsap1	uc008itu.1	chr2	25784715	25800123
no Peak	Cant1	uc007mpe.1	chr11	118267602	118280400
no Peak	Capn10	uc007cby.1	chr1	94830984	94844525
no Peak	Capza1	uc008quq.1	chr3	104625852	104667312
no Peak	Capza2	uc009azt.1	chr6	17587097	17616536
no Peak	Carf	uc007bei.1	chr1	60155124	60207878
no Peak	Cars	uc009kpn.1	chr7	150743609	150785947
no Peak	Casc4	uc008lzt.1	chr2	121692865	121761595
no Peak	Casc5	uc008lta.1	chr2	118872854	118929857
no Peak	Casp3	uc009lql.1	chr8	47702760	47724062
no Peak	Casp7	uc008hyw.1	chr19	56471618	56516833
no Peak	Casp8	uc007bcs.1	chr1	58852217	58904347
no Peak	Cast	uc007rfp.1	chr13	74831733	74945369
no Peak	Catsper2	uc008lza.1	chr2	121223196	121239528
no Peak	Cat	uc008liw.1	chr2	103294159	103325277
no Peak	Cbara1	uc007fdy.1	chr10	59165382	59326870
no Peak	Cbfa2t2	uc008njf.1	chr2	154262253	154365092
no Peak	Cblb	uc007zlf.1	chr16	52031661	52208159
no Peak	Cbll1	uc007nhl.1	chr12	32171763	32184405
no Peak	cbp146	uc007noc.1	chr12	56035726	56087323
no Peak	cbp82	uc008lue.1	chr2	119500835	119559401
no Peak	Cbr1	uc007zzr.1	chr16	93608081	93610594
no Peak	Cbr4	uc009lub.1	chr8	63966580	63982279
no Peak	Cbwd1	uc008hax.1	chr19	24994918	25036074
no Peak	Cbx3	uc009bxr.1	chr6	51420614	51433703
no Peak	Cbx4	uc007mpw.1	chr11	118941468	118947453
no Peak	Cbx5	uc007xxn.1	chr15	103021976	103070247
no Peak	Cbx7	uc007wuv.1	chr15	79746236	79763076
no Peak	Cbx8	uc007mpu.1	chr11	118899749	118902227
no Peak	Ccar1	uc007fja.1	chr10	62207209	62255004
no Peak	Ccdc109a	uc007fdt.1	chr10	58917693	59079440
no Peak	Ccdc115	uc007aoq.1	chr1	34493520	34496517
no Peak	Ccdc117	uc007hwp.1	chr11	5428890	5442158
no Peak	Ccdc123	uc009gjv.1	chr7	36182111	36223703
no Peak	Ccdc125	uc007rrj.1	chr13	101439464	101467195
no Peak	Ccdc12	uc009rum.1	chr9	110559006	110614058
no Peak	Ccdc131	uc007hbg.1	chr10	114822014	114869827
no Peak	Ccdc134	uc007wye.1	chr15	81958351	81972632
no Peak	Ccdc139	uc007ifk.1	chr11	23565673	23632876
no Peak	Ccdc15	uc009oum.1	chr9	37083419	37155977
no Peak	Ccdc16	uc007kmy.1	chr11	82577846	82581124
no Peak	Ccdc18	uc008ynr.1	chr5	108561932	108661968
no Peak	Ccdc21	uc008vef.1	chr4	133720026	133742965
no Peak	Ccdc25	uc007ujq.1	chr14	66456138	66485441
no Peak	Ccdc28a	uc007eme.1	chr10	17933490	17954787
no Peak	Ccdc44	uc007lyb.1	chr11	105927420	105934926
no Peak	Ccdc52	uc007zhg.1	chr16	44347569	44388499
no Peak	Ccdc53	uc007grh.1	chr10	87663839	87708903
no Peak	Ccdc55	uc007kgg.1	chr11	76857793	76891937
no Peak	Ccdc58	uc007zce.1	chr16	36071770	36092197
no Peak	Ccdc5	uc008frs.1	chr18	77996305	78006519
no Peak	Ccdc69	uc007iyu.1	chr11	54863239	54891633
no Peak	Ccdc72	uc009rrw.1	chr9	108980501	108984895
no Peak	Ccdc77	uc009dmz.1	chr6	120274715	120307378
no Peak	Ccdc88b	uc008gjb.1	chr19	6919112	6932701
no Peak	Ccdc88c	uc007ote.1	chr12	102150909	102267193
no Peak	Ccdc91	uc009esy.1	chr6	147424392	147581134
no Peak	Ccdc93	uc007cju.1	chr1	123327643	123398170
no Peak	Ccdc97	uc009ftr.1	chr7	26496135	26504072
no Peak	Ccdc99	uc007ilc.1	chr11	34622691	34647126
no Peak	Ccnb1	uc007rro.1	chr13	101548693	101556441
no Peak	Ccnc	uc008scv.1	chr4	21654876	21677693
no Peak	Ccnf	uc008avh.1	chr17	24367970	24388354
no Peak	Ccng1	uc007ilz.1	chr11	40562053	40568788
no Peak	Ccng2	uc008yee.1	chr5	93696282	93705250
no Peak	Ccnk	uc007ozm.1	chr12	109417947	109441567
no Peak	Ccnl2	uc008wew.1	chr4	155186597	155198652
no Peak	Ccnt1	uc007xmv.1	chr15	98373641	98398714
no Peak	Ccnt2	uc007cla.1	chr1	129670740	129702509
no Peak	Ccr7	uc007lih.1	chr11	99005512	99016391
no Peak	Ccrk	uc007qyx.1	chr13	64533860	64541029
no Peak	Cct2	uc007hcs.1	chr10	116488053	116500870
no Peak	Cct4	uc007ieo.1	chr11	22890592	22903336
no Peak	Cd1d1	uc008prt.1	chr3	86799759	86803259
no Peak	Cd1d2	uc008prs.1	chr3	86790507	86793454
no Peak	Cd24a	uc007ezl.1	chr10	43298974	43304071
no Peak	Cd274	uc008hdi.1	chr19	29441944	29462584
no Peak	Cd28	uc007bev.1	chr1	60803311	60821470
no Peak	Cd2	uc008qrf.1	chr3	101079830	101091862
no Peak	Cd3g	uc009pex.1	chr9	44777770	44788507
no Peak	Cd48	uc007doz.1	chr1	173612185	173635388
no Peak	Cd5	uc008gqv.1	chr19	10792632	10813464
no Peak	Cd6	uc008gqy.1	chr19	10863828	10904548
no Peak	Cd82	uc008lfz.1	chr2	93259268	93303103
no Peak	Cd84	uc007dpe.1	chr1	173770734	173818817
no Peak	Cd96	uc007zjf.1	chr16	46035769	46120222
no Peak	Cdadc1	uc007uep.1	chr14	60186565	60216781
no Peak	Cdc123	uc008ift.1	chr2	5715339	5766006
no Peak	Cdc14a	uc008rca.1	chr3	115975470	116126950
no Peak	Cdc25a	uc009rsw.1	chr9	109778082	109796394
no Peak	Cdc25b	uc008mky.1	chr2	131012814	131024201
no Peak	Cdc25c	uc008elf.1	chr18	34892650	34911187
no Peak	Cdc27	uc007lwq.1	chr11	104363842	104411934
no Peak	Cdc2l5	uc007poc.1	chr13	17807567	17896836
no Peak	Cdc37	uc009okg.1	chr9	20942984	20954350
no Peak	Cdc40	uc007exe.1	chr10	40551431	40602924
no Peak	Cdc42se2	uc007iyf.1	chr11	54531003	54601138
no Peak	Cdc5l	uc008cqj.1	chr17	45528838	45570656
no Peak	Cdc7	uc008ylw.1	chr5	107393340	107413450
no Peak	Cdca4	uc007pfj.1	chr12	114058445	114067634
no Peak	Cdgap	uc007zfg.1	chr16	38598455	38713148
no Peak	Cdk5rap1	uc008njb.1	chr2	154161121	154198455
no Peak	Cdk5rap3	uc007lcv.1	chr11	96769099	96777795
no Peak	Cdk7	uc007rrk.1	chr13	101473269	101500878
no Peak	Cdkal1	uc007pyn.1	chr13	29417174	29947457
no Peak	Cdkl3	uc007iuz.1	chr11	51817823	51898611
no Peak	Cdkn1b	uc009ela.1	chr6	134870434	134874076
no Peak	Cdkn2aip	uc009lrh.1	chr8	48794801	48799253
no Peak	Cdkn2c	uc008ucs.1	chr4	109333480	109339262
no Peak	Cdr2	uc009jni.1	chr7	128100553	128125798
no Peak	Cdyl2	uc009noi.1	chr8	119098299	119256891
no Peak	Cdyl	uc007qce.1	chr13	35751748	35965493
no Peak	Cecr5	uc009dnl.1	chr6	120459511	120481317
no Peak	Cenpc1	uc008xxc.1	chr5	86441049	86494496
no Peak	Cenpe	uc008rkz.1	chr3	134875526	134936504
no Peak	Cenpf	uc007eap.1	chr1	191464492	191511965
no Peak	Cenpi	uc009ufu.1	chrX	130842701	130897178
no Peak	Cenpk	uc007rtd.1	chr13	105019034	105039697
no Peak	Cenpq	uc008con.1	chr17	41060003	41071500
no Peak	Centb2	uc007yxb.1	chr16	31092498	31201324
no Peak	Centd2	uc009iok.1	chr7	108496582	108561100
no Peak	Cep27	uc008lwo.1	chr2	120435171	120446554
no Peak	Cep350	uc007dbt.1	chr1	157783005	157820385
no Peak	Cep63	uc009rfr.1	chr9	102488907	102528454
no Peak	Cetn2	uc009tku.1	chrX	70158903	70163683
no Peak	Cetn3	uc007rid.1	chr13	81922290	81936156
no Peak	Cfdp1	uc009nmx.1	chr8	114292372	114378210
no Peak	Cflar	uc007bcn.1	chr1	58768351	58815726
no Peak	Cggbp1	uc007zqf.1	chr16	64851910	64859317
no Peak	Chchd3	uc009bgo.1	chr6	32742226	33010152
no Peak	Chchd4	uc009cyb.1	chr6	91414269	91423417
no Peak	Chchd5	uc008mhg.1	chr2	128955557	128959843
no Peak	Chchd6	uc009cwh.1	chr6	89333152	89545609
no Peak	Chchd7	uc008rwu.1	chr4	3866060	3877654
no Peak	Chd1	uc008aou.1	chr17	15842253	15907328
no Peak	Chd2	uc009hrc.1	chr7	80574493	80682507
no Peak	Chd6	uc008nrn.1	chr2	160772713	160934792
no Peak	Chek1	uc009otw.1	chr9	36516066	36534212
no Peak	Chmp4b	uc008njp.1	chr2	154477477	154520519
no Peak	Chmp5	uc008sia.1	chr4	40895568	40912335
no Peak	Chordc1	uc009ogm.1	chr9	18096710	18118444
no Peak	Churc1	uc007nyq.1	chr12	77866559	77884165
no Peak	Ciapin1	uc009mxa.1	chr8	97343718	97362240
no Peak	Cisd2	uc008rlk.1	chr3	135069377	135086397
no Peak	Cited2	uc007elt.1	chr10	17443051	17445461
no Peak	Ckap2l	uc008mho.1	chr2	129094616	129122900
no Peak	Ckap5	uc008kwb.1	chr2	91366951	91413224
no Peak	Clasp1	uc007cif.1	chr1	120285634	120506039
no Peak	Clcn3	uc009ltm.1	chr8	63389185	63462097
no Peak	Clcn4-2	uc009fcr.1	chr7	7235026	7252222
no Peak	Clec2d	uc009efe.1	chr6	129130639	129136552
no Peak	Clec2i	uc009eeu.1	chr6	128837631	128846866
no Peak	Clip2	uc008zwi.1	chr5	134965255	135028304
no Peak	Clk4	uc007itr.1	chr11	51076672	51095266
no Peak	Clp1	uc008kja.1	chr2	84563278	84567425
no Peak	Clpb	uc009ipd.1	chr7	108812281	108943974
no Peak	Clpx	uc009qdb.1	chr9	65142101	65178465
no Peak	Clspn	uc008utn.1	chr4	126234268	126271147
no Peak	Cluap1	uc007xza.1	chr16	3909008	3913572
no Peak	Cmas	uc009eps.1	chr6	142705292	142724228
no Peak	Cmpk	uc008ueg.1	chr4	114633242	114659751
no Peak	Cmtm7	uc009ryc.1	chr9	114665953	114690947
no Peak	Cnbp	uc009cuc.1	chr6	87793073	87800989
no Peak	Cnga1	uc008xrr.1	chr5	72994935	73033991
no Peak	Cnot1	uc009mzb.1	chr8	98254312	98276688
no Peak	Cnot4	uc009bie.1	chr6	34972067	35083715
no Peak	Cnot6l	uc008yfg.1	chr5	96504756	96591009
no Peak	Cnot7	uc009lmt.1	chr8	41578389	41601201
no Peak	Cntrob	uc007jpp.1	chr11	69112997	69137375
no Peak	Cog6	uc008pen.1	chr3	52786087	52821115
no Peak	Col4a3bp	uc007rnk.1	chr13	97312700	97407505
no Peak	Commd10	uc008evz.1	chr18	47118529	47247648
no Peak	Commd2	uc008phd.1	chr3	57448270	57455606
no Peak	Commd4	uc009pul.1	chr9	57002847	57006106
no Peak	Commd6	uc007uvt.1	chr14	102032983	102039662
no Peak	Commd8	uc008xrf.1	chr5	72548238	72559422
no Peak	Commd9	uc008lhq.1	chr2	101726418	101741796
no Peak	Copb1	uc009jhx.1	chr7	121359072	121398194
no Peak	Cops4	uc008yhs.1	chr5	100947477	100976794
no Peak	Cops5	uc007ahe.1	chr1	10014911	10027979
no Peak	Cops7a	uc009dsr.1	chr6	124908469	124915520
no Peak	Coq10b	uc007azz.1	chr1	55109613	55129546
no Peak	Coq7	uc009jjy.1	chr7	125668575	125676827
no Peak	Cotl1	uc009nqj.1	chr8	122333124	122364440
no Peak	Cox10	uc007jko.1	chr11	63777387	63892916
no Peak	Cox17	uc007zet.1	chr16	38347084	38352849
no Peak	Cox7a2l	uc008dsc.1	chr17	83901270	83913641
no Peak	Cox7a2	uc009quv.1	chr9	79603047	79607660
no Peak	Cox7c	uc007riy.1	chr13	86184402	86186400
no Peak	Cradd	uc007gwc.1	chr10	94637379	94786731
no Peak	Crebbp	uc007xzl.1	chr16	4084047	4213404
no Peak	Creg1	uc007djm.1	chr1	167693910	167705435
no Peak	Cript	uc008duo.1	chr17	87424935	87435150
no Peak	Crk	uc007ker.1	chr11	75492811	75519594
no Peak	Crlf3	uc007kld.1	chr11	79860000	79894457
no Peak	Crot	uc008wkt.1	chr5	8966047	8997146
no Peak	Crry	uc007eev.1	chr1	196923575	196957764
no Peak	Crtc3	uc009iaz.1	chr7	87731517	87833763
no Peak	Cry1	uc007gle.1	chr10	84594444	84647799
no Peak	Cryl1	uc007ucz.1	chr14	57893870	58017320
no Peak	Csad	uc007xuv.1	chr15	102018973	102033594
no Peak	Csnk1g1	uc009qeg.1	chr9	65756816	65892821
no Peak	Csnk1g3	uc008eya.1	chr18	54021766	54115338
no Peak	Csnk2a1	uc008nfa.1	chr2	152052682	152107583
no Peak	Csrp2bp	uc008mqy.1	chr2	144194770	144233366
no Peak	Cst3	uc008mtt.1	chr2	148697467	148701204
no Peak	Cstb	uc007fxt.1	chr10	77888414	77890367
no Peak	Cstf3	uc008ljz.1	chr2	104430679	104505582
no Peak	Ctbp1	uc008xak.1	chr5	33590371	33617618
no Peak	Ctcf	uc009ndm.1	chr8	108160440	108206822
no Peak	Ctdp1	uc008ftb.1	chr18	80604697	80666406
no Peak	Ctdspl2	uc008lzy.1	chr2	121782188	121839322
no Peak	Ctps2	uc009uuo.1	chrX	159339536	159470257
no Peak	Ctps	uc008unj.1	chr4	120212470	120242868
no Peak	Ctr9	uc009jfx.1	chr7	118172464	118199891
no Peak	Ctsc	uc009ifu.1	chr7	95426644	95459398
no Peak	Ctsd	uc009kmv.1	chr7	149561820	149573775
no Peak	Ctse	uc007cnn.1	chr1	133534890	133572079
no Peak	Ctsl	uc007qyw.1	chr13	64464521	64471614
no Peak	Cugbp2	uc008igv.1	chr2	6464475	7317627
no Peak	Cul4a	uc009kww.1	chr8	13105742	13147776
no Peak	Cutc	uc008hou.1	chr19	43827485	43843121
no Peak	Cutl1	uc009aal.1	chr5	136724004	137043301
no Peak	Cwc15	uc009oeo.1	chr9	14305062	14315064
no Peak	Cwf19l2	uc009oba.1	chr9	3404084	3479236
no Peak	Cxcr4	uc007clt.1	chr1	130484775	130488876
no Peak	Cxxc1	uc008fpg.1	chr18	74375865	74381145
no Peak	Cxxc5	uc008emx.1	chr18	35989471	36021342
no Peak	Cyb561d1	uc008qyj.1	chr3	107998688	108003752
no Peak	Cyb5b	uc009nhg.1	chr8	109674560	109711370
no Peak	Cyb5d1	uc007jpz.1	chr11	69207113	69208848
no Peak	Cyb5r3	uc007xac.1	chr15	82983931	83002638
no Peak	Cyfip2	uc007iod.1	chr11	46007359	46126361
no Peak	Cyhr1	uc007wlf.1	chr15	76476196	76490538
no Peak	D030016E14Rik	uc009lra.1	chr8	48575481	48618824
no Peak	D030070L09Rik	uc008ego.1	chr18	24263261	24280320
no Peak	D0HXS9928E	uc009ton.1	chrX	71558371	71565472
no Peak	D10627	uc009lxc.1	chr8	71732944	71754438
no Peak	D10Ertd641e	uc007fef.1	chr10	59450656	59465860
no Peak	D11Bwg0434e	uc007juf.1	chr11	70048707	70053332
no Peak	D12Ertd551e	uc007php.1	chr12	117519694	117629523
no Peak	D12Ertd553e	uc007nbc.1	chr12	12268982	12383167
no Peak	D13Wsu177e	uc007qok.1	chr13	54685551	54691435
no Peak	D14Ertd500e	uc007twh.1	chr14	55160621	55173173
no Peak	D15Wsu75e	uc007wxw.1	chr15	81822952	81846570
no Peak	D16Ertd472e	uc007zsq.1	chr16	78543787	78576892
no Peak	D17H6S56E-5	uc008cew.1	chr17	35134132	35137903
no Peak	D17Wsu92e	uc008bpp.1	chr17	27888179	27957487
no Peak	D18Ertd653e	uc008fng.1	chr18	68092910	68415203
no Peak	D19Bwg1357e	uc008hby.1	chr19	27463191	27504310
no Peak	D19Ertd737e	uc008ibt.1	chr19	60274488	60302604
no Peak	D230010M03Rik	uc008kwp.1	chr2	91551106	91561723
no Peak	D2Ertd391e	uc008kwn.1	chr2	91514781	91550733
no Peak	D2Ertd750e	uc008lst.1	chr2	118639738	118660375
no Peak	D3Ertd751e	uc008pcr.1	chr3	41546539	41562861
no Peak	D3Ucla1	uc008phs.1	chr3	58325899	58329676
no Peak	D4Ertd196e	uc008vcp.1	chr4	132821959	132833705
no Peak	D530033C11Rik	uc007vrc.1	chr15	51709055	51716160
no Peak	D6Wsu163e	uc009dvn.1	chr6	126889983	126925722
no Peak	D8Ertd738e	uc009mmh.1	chr8	86770142	86773609
no Peak	D930015E06Rik	uc008ppp.1	chr3	83702208	83844083
no Peak	D9Ertd402e	uc009sfc.1	chr9	122714717	122745450
no Peak	Dap3	uc008pxg.1	chr3	88727362	88754204
no Peak	Dapk1	uc007qvn.1	chr13	60703307	60864547
no Peak	Dars	uc007clp.1	chr1	130260283	130313915
no Peak	Dbi	uc007cjf.1	chr1	122009856	122017656
no Peak	Dbr1	uc009rei.1	chr9	99476217	99484762
no Peak	Dbt	uc008rcg.1	chr3	116216058	116252310
no Peak	Dck	uc008yah.1	chr5	89194037	89212302
no Peak	Dclre1b	uc008qtl.1	chr3	103604527	103613310
no Peak	Dcp1a	uc007svb.1	chr14	31292750	31340242
no Peak	Dcp1b	uc009dlx.1	chr6	119125270	119170222
no Peak	Dctn4	uc008fai.1	chr18	60685874	60710716
no Peak	Dctn6	uc009lko.1	chr8	35153474	35171497
no Peak	Dcun1d1	uc008oyx.1	chr3	35791902	35831758
no Peak	Dcun1d5	uc009ocf.1	chr9	7184565	7207031
no Peak	Ddef1	uc007vzk.1	chr15	63920100	64214481
no Peak	Ddit4	uc007fee.1	chr10	59412422	59414518
no Peak	Ddx10	uc009plz.1	chr9	52906741	53056196
no Peak	Ddx19b	uc009nln.1	chr8	113527087	113555651
no Peak	Ddx26b	uc009tgg.1	chrX	53708053	53761016
no Peak	Ddx47	uc009eld.1	chr6	134961637	134973789
no Peak	Ddx50	uc007fhp.1	chr10	62078770	62113946
no Peak	Ddx56	uc007hyc.1	chr11	6157547	6167732
no Peak	Ddx58	uc008shf.1	chr4	40150809	40186858
no Peak	Ddx5	uc007lzs.1	chr11	106644758	106649808
no Peak	Ddx6	uc009pdy.1	chr9	44412979	44441499
no Peak	Degs1	uc007dxw.1	chr1	184205900	184212890
no Peak	Dennd4b	uc008qbx.1	chr3	90070456	90084587
no Peak	Dennd4c	uc008tma.1	chr4	86394458	86476071
no Peak	Depdc1a	uc008rvz.1	chr3	159158414	159192917
no Peak	Depdc5	uc008xad.1	chr5	33206369	33334209
no Peak	Dera	uc009enh.1	chr6	137703097	137786393
no Peak	Derl1	uc007vsq.1	chr15	57701056	57723973
no Peak	Derl2	uc007jxk.1	chr11	70820946	70832777
no Peak	Dexi	uc007ydx.1	chr16	10530299	10543147
no Peak	Dgkg	uc007ysg.1	chr16	22468531	22657261
no Peak	Dguok	uc009cnn.1	chr6	83430210	83456888
no Peak	Dhfr	uc007rkl.1	chr13	93124737	93159008
no Peak	Dhodh	uc009nip.1	chr8	112117147	112132573
no Peak	Dhrs7b	uc007jgq.1	chr11	60644181	60671648
no Peak	Dhx15	uc008xkf.1	chr5	52541447	52581758
no Peak	Dhx29	uc007rwx.1	chr13	113718000	113759395
no Peak	Dhx36	uc008pjn.1	chr3	62274006	62310910
no Peak	Dhx38	uc009nij.1	chr8	112071923	112089501
no Peak	Dhx9	uc007czy.1	chr1	155302887	155334790
no Peak	Dido1	uc008ojq.1	chr2	180392668	180436805
no Peak	Dirc2	uc007zbo.1	chr16	35694988	35769442
no Peak	Dis3l2	uc007bvw.1	chr1	88600417	88946667
no Peak	Dlg4	uc007jtp.1	chr11	69832365	69858270
no Peak	Dlgap4	uc008nnt.1	chr2	156546720	156590099
no Peak	Dmxl1	uc008ewn.1	chr18	49992666	50124739
no Peak	Dnaja2	uc009mqa.1	chr8	88061538	88079170
no Peak	Dnajb1	uc009mkp.1	chr8	86132091	86135395
no Peak	Dnajb4	uc008rsr.1	chr3	151847059	151873047
no Peak	Dnajb6	uc008wup.1	chr5	30062479	30093641
no Peak	Dnajb9	uc007nlo.1	chr12	45306883	45311055
no Peak	Dnajc10	uc008khj.1	chr2	80155622	80194212
no Peak	Dnajc18	uc008emq.1	chr18	35833480	35862775
no Peak	Dnajc5	uc008omq.1	chr2	181255209	181286954
no Peak	Dnajc6	uc008tvq.1	chr4	101169283	101315404
no Peak	Dnajc8	uc008vbm.1	chr4	132091470	132109650
no Peak	Dnmt1	uc009ojp.1	chr9	20711652	20757317
no Peak	Dnmt3a	uc007mxb.1	chr12	3806979	3914443
no Peak	Dnpep	uc007bou.1	chr1	75304470	75313582
no Peak	Dnttip2	uc008rep.1	chr3	121977331	121988189
no Peak	Dock2	uc007ikx.1	chr11	34126863	34597325
no Peak	Dock8	uc008hba.1	chr19	25074018	25276922
no Peak	Dok2	uc007uoy.1	chr14	71174187	71178301
no Peak	Dph5	uc008rbs.1	chr3	115591100	115632241
no Peak	Dpp4	uc008jvg.1	chr2	62169795	62250139
no Peak	Dpp9	uc008dbh.1	chr17	56326104	56358259
no Peak	Dpy19l3	uc009gkg.1	chr7	36473852	36539417
no Peak	Dpysl2	uc007uko.1	chr14	67421700	67487437
no Peak	DQ708924	uc009bey.1	chr6	30161293	30162401
no Peak	DQ716436	uc007ffz.1	chr10	60892007	60893694
no Peak	Drctnnb1a	uc008wqv.1	chr5	23466753	23536501
no Peak	Drg1	uc007hsh.1	chr11	3149924	3166389
no Peak	DRIM	uc007grx.1	chr10	88209351	88237716
no Peak	Dscr2	uc008ach.1	chr16	96201541	96212510
no Peak	Dscr3	uc008abe.1	chr16	94719394	94748050
no Peak	Dtl	uc007eck.1	chr1	193361243	193399413
no Peak	Dtnb	uc007mww.1	chr12	3572522	3781505
no Peak	Dtwd1	uc008mdk.1	chr2	125977876	125991012
no Peak	Dtwd2	uc008ewl.1	chr18	49856467	49915229
no Peak	Dtx2	uc008zzm.1	chr5	136470746	136508734
no Peak	Dtx3l	uc007zbv.1	chr16	35926600	35939113
no Peak	Dtymk	uc007cek.1	chr1	95689159	95698452
no Peak	Dus2l	uc009nfa.1	chr8	108535406	108577719
no Peak	Dus3l	uc008ddd.1	chr17	56904200	56909264
no Peak	Dus4l	uc007nhr.1	chr12	32324919	32339691
no Peak	Dusp10	uc007dym.1	chr1	185858339	185899515
no Peak	Dusp11	uc009cqp.1	chr6	85892262	85911661
no Peak	Dusp1	uc008bee.1	chr17	26642535	26645406
no Peak	Dusp23	uc007dqw.1	chr1	174560899	174563105
no Peak	Dusp4	uc009lks.1	chr8	35870663	35882948
no Peak	Dusp5	uc008hwx.1	chr19	53603807	53615812
no Peak	Dync1i2	uc008kah.1	chr2	71049795	71101351
no Peak	Dynlrb1	uc008nkg.1	chr2	155062313	155076009
no Peak	Dyrk1b	uc009fxz.1	chr7	28964501	28972313
no Peak	Dyrk3	uc007cmw.1	chr1	133025017	133034811
no Peak	Dzip3	uc007zjz.1	chr16	48925991	48994054
no Peak	E130014J05Rik	uc008rkq.2	chr3	133126640	133207354
no Peak	E2f2	uc008vht.1	chr4	135728308	135750629
no Peak	E2f8	uc009hba.1	chr7	56121833	56136966
no Peak	E430028B21Rik	uc007stb.1	chr14	27483602	27489332
no Peak	Eapp	uc007nnu.1	chr12	55774453	55796852
no Peak	Ears2	uc009joe.1	chr7	129182334	129210577
no Peak	Ebag9	uc007vpz.1	chr15	44450858	44472572
no Peak	Ebp	uc009soi.1	chrX	7762456	7770638
no Peak	Ecd	uc007sjg.1	chr14	21139360	21167306
no Peak	Ece1	uc008vju.1	chr4	137418211	137521144
no Peak	Echs1	uc009kgx.1	chr7	147291621	147302322
no Peak	Ect2	uc008otj.1	chr3	26996147	27052758
no Peak	Edem3	uc007czc.1	chr1	153602503	153669181
no Peak	Eed	uc009igk.1	chr7	97103185	97129480
no Peak	Eef1a1	uc009qun.1	chr9	78326260	78329531
no Peak	Eef1g	uc008goi.1	chr19	9041530	9052670
no Peak	Eef2k	uc009jnb.1	chr7	127986396	128047515
no Peak	Eef2	uc007ggf.1	chr10	80640400	80640979
no Peak	Efcab4b	uc009dwa.1	chr6	127527992	127579956
no Peak	EG434197	uc009hjf.1	chr7	75418724	75507976
no Peak	EG630499	uc008can.1	chr17	34112134	34115735
no Peak	Egln3	uc007nns.1	chr12	55279968	55304835
no Peak	Egr1	uc008elt.1	chr18	35020860	35024610
no Peak	Ehd3	uc008dnn.1	chr17	74154211	74181428
no Peak	Ehd4	uc008lvd.1	chr2	119915222	119980311
no Peak	Ehhadh	uc007yrm.1	chr16	21761363	21787869
no Peak	Ehmt1	uc008ipi.1	chr2	24646314	24775121
no Peak	Eif1a	uc008evs.1	chr18	46757357	46769862
no Peak	Eif1	uc007lkv.1	chr11	100181309	100183410
no Peak	Eif2ak3	uc009cgb.1	chr6	70794520	70855234
no Peak	Eif2a	uc008phu.1	chr3	58329937	58361423
no Peak	Eif2b2	uc007ogr.1	chr12	86560462	86567578
no Peak	Eif2b4	uc008wxl.1	chr5	31489940	31495458
no Peak	Eif2b5	uc007ypu.1	chr16	20498900	20509396
no Peak	Eif2s3y	uc009uzd.1	chrY	347054	365037
no Peak	Eif3b	uc009ahr.1	chr5	140895258	140919312
no Peak	Eif3c	uc009jrw.1	chr7	133690424	133709880
no Peak	Eif3d	uc007wom.1	chr15	77789427	77801254
no Peak	Eif3e	uc007vpk.1	chr15	43081585	43114282
no Peak	Eif3f	uc009jdc.1	chr7	116077929	116085201
no Peak	Eif4e2	uc007bwl.1	chr1	89110488	89137063
no Peak	Eif4e3	uc009dbr.1	chr6	99575130	99616765
no Peak	Eif4enif1	uc007hsc.1	chr11	3102394	3144584
no Peak	Eif4e	uc008rnn.1	chr3	138189154	138220563
no Peak	Eif4g2	uc009jfy.1	chr7	118211498	118226544
no Peak	Eif4h	uc008zwp.1	chr5	135095745	135115198
no Peak	Eif5	uc007pdd.1	chr12	112776311	112784824
no Peak	Elf1	uc007utb.1	chr14	79881000	79982283
no Peak	Elf4	uc009tcd.1	chrX	45766415	45777531
no Peak	Elmo1	uc007ppn.1	chr13	20182464	20698394
no Peak	Elmod2	uc009mka.1	chr8	85836530	85856365
no Peak	Elof1	uc009onx.1	chr9	21917432	21921613
no Peak	Elovl5	uc009qtn.1	chr9	77765174	77832320
no Peak	Elp2	uc008egx.1	chr18	24762461	24797331
no Peak	Elp4	uc008lld.1	chr2	105540265	105744657
no Peak	Emb	uc007rym.1	chr13	118009438	118062905
no Peak	Emd	uc009tob.1	chrX	71500177	71506887
no Peak	Eml4	uc008dry.1	chr17	83750321	83879699
no Peak	Emp1	uc009elo.1	chr6	135312948	135333191
no Peak	Enox2	uc009tcv.1	chrX	46363698	46641419
no Peak	Ensa	uc008qkk.1	chr3	95428901	95436039
no Peak	Eny2	uc007vpu.1	chr15	44259637	44269231
no Peak	Ep300	uc007wws.1	chr15	81416643	81482507
no Peak	Epc1	uc008dzj.1	chr18	6435948	6516085
no Peak	Epc2	uc008jpw.2	chr2	49307005	49407129
no Peak	Epm2aip1	uc009rvs.1	chr9	111174432	111181593
no Peak	Epn1	uc009ezx.1	chr7	5031906	5049778
no Peak	Epsti1	uc007usd.1	chr14	78304197	78363985
no Peak	Erbb2ip	uc007rsl.1	chr13	104608865	104710594
no Peak	Erc1	uc009dmk.1	chr6	119520813	119798168
no Peak	Ercc3	uc008eje.1	chr18	32399984	32429801
no Peak	Ercc5	uc007awi.1	chr1	44204691	44238105
no Peak	Ercc6l	uc009tyk.1	chrX	99338295	99352366
no Peak	Erh	uc007oaz.1	chr12	81735023	81744777
no Peak	Erich1	uc009kyx.1	chr8	14027564	14090327
no Peak	Erp29	uc008zjf.1	chr5	121894761	121902483
no Peak	Etaa1	uc007icf.1	chr11	17839894	17853848
no Peak	Etf1	uc008elu.1	chr18	35062438	35091657
no Peak	Etfb	uc009gmt.1	chr7	50699512	50713152
no Peak	Ewsr1	uc007hvw.1	chr11	4969690	4999080
no Peak	Exoc4	uc009bgt.1	chr6	33199149	33922930
no Peak	Exoc5	uc007tjv.1	chr14	49631817	49686342
no Peak	Exoc6	uc008hiq.1	chr19	37624907	37757739
no Peak	Exosc1	uc008hmm.1	chr19	41998212	42007784
no Peak	Exosc2	uc008jdy.1	chr2	31526256	31536827
no Peak	Ext1	uc007vrh.1	chr15	52899817	53177738
no Peak	Extl2	uc008rbw.1	chr3	115711249	115731790
no Peak	Eya2	uc008nxx.1	chr2	165480797	165597131
no Peak	Ezh2	uc009btb.1	chr6	47480279	47545019
no Peak	F13a1	uc007qco.1	chr13	36959055	37142113
no Peak	F730015K02Rik	uc009qcg.1	chr9	64659266	64707828
no Peak	Fabp5	uc008opg.1	chr3	10012605	10016610
no Peak	Fadd	uc009kql.1	chr7	151764227	151768341
no Peak	Faim	uc009rdt.1	chr9	98886791	98902437
no Peak	Fam100a	uc007yao.1	chr16	4874784	4879818
no Peak	Fam18b	uc007jkh.1	chr11	62692991	62708686
no Peak	Fancc	uc007qxt.1	chr13	63431846	63533053
no Peak	Fars2	uc007qck.1	chr13	36209279	36629462
no Peak	Fas	uc008hgi.1	chr19	34365155	34402260
no Peak	Fbf1	uc007mki.1	chr11	116003598	116029492
no Peak	Fbxl11	uc008fzx.1	chr19	4316146	4398266
no Peak	Fbxl3	uc007uwj.1	chr14	103479455	103498726
no Peak	Fbxl5	uc008xhu.1	chr5	44135856	44173335
no Peak	Fbxl6	uc007wkq.1	chr15	76366160	76369165
no Peak	Fbxo18	uc008ijd.1	chr2	11664199	11699176
no Peak	Fbxo28	uc007dyb.1	chr1	184243232	184271737
no Peak	Fbxo30	uc007ejt.1	chr10	11001171	11016763
no Peak	Fbxo32	uc007vtk.1	chr15	58011633	58046429
no Peak	Fbxo38	uc008fdd.1	chr18	62663813	62708368
no Peak	Fbxo3	uc008ljk.1	chr2	103867955	103903394
no Peak	Fbxo42	uc008vnz.1	chr4	140703845	140759977
no Peak	Fbxo45	uc007yyl.1	chr16	32230197	32247111
no Peak	Fbxo8	uc009lsr.1	chr8	59029930	59072736
no Peak	Fbxo9	uc009qtq.1	chr9	77929305	77956860
no Peak	Fbxw11	uc007ijx.1	chr11	32542874	32646814
no Peak	Fbxw5	uc008isj.1	chr2	25356297	25360990
no Peak	Fcf1	uc007ogc.1	chr12	86311901	86324253
no Peak	Fcho1	uc009met.1	chr8	74232546	74249546
no Peak	Fchsd2	uc009ioc.1	chr7	108257326	108432919
no Peak	Fem1a	uc008dbk.1	chr17	56396244	56400498
no Peak	Fem1c	uc008evo.1	chr18	46664259	46685625
no Peak	Fez2	uc008dow.1	chr17	78777224	78817443
no Peak	Fgd3	uc007qjd.1	chr13	49358478	49404577
no Peak	Fgfr1op	uc008ajc.1	chr17	8358400	8389333
no Peak	Fgr	uc008vcb.1	chr4	132530042	132557721
no Peak	Fh1	uc007dtn.1	chr1	177531508	177555709
no Peak	Fignl1	uc007iat.1	chr11	11700290	11708935
no Peak	Fiz1	uc009ezh.1	chr7	4958660	4966260
no Peak	Fkbp4	uc009edr.1	chr6	128380124	128388649
no Peak	Fkbp5	uc008bra.1	chr17	28536041	28654469
no Peak	Fkbp7	uc008kfh.1	chr2	76501101	76511127
no Peak	Flcn	uc007jex.1	chr11	59605252	59623338
no Peak	Fli1	uc009orz.1	chr9	32229792	32348953
no Peak	Flna	uc009tnz.1	chrX	71468799	71491873
no Peak	Fmr1	uc009tiw.1	chrX	65931729	65971136
no Peak	Fnbp1	uc008jdj.1	chr2	30881725	30997526
no Peak	Fnip1	uc007ixx.1	chr11	54251690	54331738
no Peak	Fnta	uc009lhi.1	chr8	27109193	27126073
no Peak	Fosb	uc009flk.1	chr7	19888044	19895394
no Peak	Fos	uc007oha.1	chr12	86814850	86818219
no Peak	Foxk2	uc007mvr.1	chr11	121116807	121171210
no Peak	Foxn3	uc007ort.1	chr12	100433303	100688284
no Peak	Foxo1	uc008pei.1	chr3	52072295	52153460
no Peak	Foxp4	uc008cwl.1	chr17	48004081	48061392
no Peak	Foxred1	uc009osw.1	chr9	35011805	35018555
no Peak	Fpgt	uc008ruu.1	chr3	154747882	154756342
no Peak	Frat1	uc008hmi.1	chr19	41904605	41907073
no Peak	Frat2	uc008hmj.1	chr19	41920469	41922622
no Peak	Frg1	uc009lnx.1	chr8	42482818	42502428
no Peak	Frmd4b	uc009daw.1	chr6	97236860	97567576
no Peak	Frmd6	uc007ntv.1	chr12	71926500	72003221
no Peak	Frrs1	uc008rcw.1	chr3	116564609	116606559
no Peak	Frs2	uc007hct.1	chr10	116507182	116585530
no Peak	Fryl	uc008xsn.1	chr5	73411429	73647857
no Peak	Fto	uc009mst.1	chr8	93837437	94192329
no Peak	Ftsj2	uc009ahm.1	chr5	140803627	140807852
no Peak	Fuca2	uc007ekw.1	chr10	13220833	13237081
no Peak	Fundc2	uc009tpu.1	chrX	72627760	72641455
no Peak	Fut8	uc007nyy.1	chr12	78339111	78576974
no Peak	Fvt1	uc007cgy.1	chr1	108621478	108656228
no Peak	Fxn	uc008hao.1	chr19	24335942	24355076
no Peak	Fxyd5	uc009gho.1	chr7	31817748	31827148
no Peak	Fyb	uc007vdj.1	chr15	6529870	6613312
no Peak	Fyco1	uc009sgr.1	chr9	123698627	123760687
no Peak	G3bp2	uc008ycj.1	chr5	92481171	92512761
no Peak	G430022H21Rik	uc008rfi.1	chr3	123071214	123088866
no Peak	G6pdx	uc009toy.1	chrX	71654824	71674500
no Peak	Gabarapl2	uc009nnb.1	chr8	114464617	114476480
no Peak	Gabpa	uc007ztl.1	chr16	84835368	84864023
no Peak	Gabpb1	uc008mdu.1	chr2	126454648	126501223
no Peak	Gabpb2	uc008qin.1	chr3	94985689	95021864
no Peak	Gadd45a	uc009cfc.1	chr6	66985089	66987401
no Peak	Gadd45b	uc007gfl.1	chr10	80392835	80394949
no Peak	Gadd45g	uc007qmq.1	chr13	51942063	51943843
no Peak	Gak	uc008yoh.1	chr5	108998432	109058758
no Peak	Galk2	uc008mde.1	chr2	125684953	125810034
no Peak	Galnt2	uc009nwz.1	chr8	126755293	126869622
no Peak	Galnt7	uc009lsy.1	chr8	60003365	60131800
no Peak	Gapvd1	uc008jiq.1	chr2	34532501	34610752
no Peak	Gars	uc009cai.1	chr6	54987994	55029498
no Peak	Gart	uc007zxu.1	chr16	91621641	91647217
no Peak	Gata3	uc008ihe.1	chr2	9778704	9800227
no Peak	Gatad2a	uc009lyg.1	chr8	72432368	72520263
no Peak	Gatad2b	uc008qca.1	chr3	90097105	90156474
no Peak	Gbe1	uc007zqu.1	chr16	70314331	70569961
no Peak	Gbf1	uc008hsp.1	chr19	46227047	46361000
no Peak	Gcc1	uc009bcp.1	chr6	28366690	28378390
no Peak	Gcc2	uc007fcx.1	chr10	57718273	57768340
no Peak	Gdap2	uc008qqr.1	chr3	99966440	100010904
no Peak	Gdpd1	uc007kte.1	chr11	86847390	86887550
no Peak	Gemin5	uc007jan.1	chr11	57934791	57981975
no Peak	Gemin6	uc008dqv.1	chr17	80623828	80627837
no Peak	Gfi1	uc008ymw.1	chr5	108145673	108154825
no Peak	Gfpt1	uc009cta.1	chr6	86992843	87038365
no Peak	Gga1	uc007wrn.1	chr15	78707619	78725014
no Peak	Ggh	uc008sck.1	chr4	19969198	19993258
no Peak	Ggps1	uc007pmu.1	chr13	14143195	14155668
no Peak	Ggta1	uc008jkk.1	chr2	35255733	35316848
no Peak	Ghitm	uc007tby.1	chr14	37934003	37948452
no Peak	Gimap9	uc009bvh.1	chr6	48626133	48628703
no Peak	Git2	uc008yzz.1	chr5	115177416	115223501
no Peak	Glb1	uc009rxm.1	chr9	114310236	114383495
no Peak	Glg1	uc009nma.1	chr8	113681457	113783102
no Peak	Glo1	uc008btx.1	chr17	30729806	30749536
no Peak	Gls	uc007aye.1	chr1	52222426	52289836
no Peak	Glt8d3	uc007xiq.1	chr15	93070172	93105515
no Peak	Gltscr2	uc009fgr.1	chr7	16523184	16531407
no Peak	Glud1	uc007tas.1	chr14	35123936	35158091
no Peak	Glul	uc007daq.1	chr1	155747074	155756844
no Peak	Gm1040	uc008wuj.1	chr5	29761206	29778709
no Peak	Gm114	uc008mso.1	chr2	146681624	146795825
no Peak	Gm237	uc007flz.1	chr10	67007878	67011690
no Peak	Gm2a	uc007iyw.1	chr11	54911618	54924400
no Peak	Gm561	uc008mrn.1	chr2	144419800	144421101
no Peak	Gm568	uc008suh.1	chr4	47021188	47023653
no Peak	Gm889	uc007nkx.1	chr12	40902972	40925902
no Peak	Gmcl1	uc009csl.1	chr6	86641763	86683348
no Peak	Gmds	uc007pzq.1	chr13	31911454	32430413
no Peak	Gmeb1	uc008vau.1	chr4	131780933	131817464
no Peak	Gmeb2	uc008olr.1	chr2	180986155	181022671
no Peak	Gmnn	uc007pwh.1	chr13	24843713	24853806
no Peak	Gmps	uc008pke.1	chr3	63780064	63823000
no Peak	Gna13	uc007mce.1	chr11	109224107	109262683
no Peak	Gnai3	uc008qyd.1	chr3	107910216	107949032
no Peak	Gnas	uc008oes.1	chr2	174109820	174172243
no Peak	Gne	uc008sro.1	chr4	44049698	44097038
no Peak	Gngt2	uc007lau.1	chr11	95703608	95707045
no Peak	Gnl3l	uc009uov.1	chrX	147417683	147451793
no Peak	Gnptab	uc007grl.1	chr10	87842156	87910074
no Peak	Golga3	uc008yqd.1	chr5	110605719	110652174
no Peak	Golga7	uc009les.1	chr8	24351797	24367552
no Peak	Golph3l	uc008qkg.1	chr3	95392880	95423164
no Peak	Gopc	uc007fbg.1	chr10	52056887	52101881
no Peak	Gosr1	uc007kfz.1	chr11	76540103	76577057
no Peak	Gosr2	uc007lvo.1	chr11	103538174	103559008
no Peak	Got1	uc008hoi.1	chr19	43574244	43598999
no Peak	Got2	uc009mzi.1	chr8	98388036	98412265
no Peak	Gpatch1	uc009gjq.1	chr7	36061562	36103459
no Peak	Gpd1l	uc009ryj.1	chr9	114811417	114842945
no Peak	Gphn	uc007nzc.1	chr12	79327720	79785725
no Peak	Gpi1	uc009gix.1	chr7	34987176	35015281
no Peak	Gpr107	uc008jdp.1	chr2	31007853	31072087
no Peak	Gpr108	uc008deh.1	chr17	57374337	57387064
no Peak	Gpr132	uc007pfk.1	chr12	114089086	114099127
no Peak	Gprasp1	uc009uhn.1	chrX	132277230	132338007
no Peak	Gpx1	uc009rpf.1	chr9	108241606	108242671
no Peak	Gramd1a	uc009gif.1	chr7	31915145	31936069
no Peak	Gramd3	uc008eyj.1	chr18	56559990	56663446
no Peak	Grpel1	uc008xep.1	chr5	36807833	36816726
no Peak	Grpel2	uc008fcn.1	chr18	61869999	61885985
no Peak	Gstcd	uc008rkh.1	chr3	132645514	132754997
no Peak	Gstp1	uc008fyf.1	chr19	4035410	4037912
no Peak	Gstt2	uc007frf.1	chr10	75294629	75297031
no Peak	Gtf2a1	uc007oks.1	chr12	92797154	92828927
no Peak	Gtf2b	uc008rpb.1	chr3	142428210	142446569
no Peak	Gtf2e1	uc007zeb.1	chr16	37509881	37539855
no Peak	Gtf2f1	uc008ddp.1	chr17	57142824	57150711
no Peak	Gtf2h1	uc009gzk.1	chr7	54051472	54079167
no Peak	Gtf2h5	uc008aga.1	chr17	6079864	6085479
no Peak	Gtf2ird1	uc008zvv.1	chr5	134833530	134932581
no Peak	Gtf2i	uc008zvn.1	chr5	134713703	134790616
no Peak	Gtf3c2	uc008wxi.1	chr5	31460715	31482517
no Peak	Gtf3c3	uc007azp.1	chr1	54454424	54495815
no Peak	Gtpbp5	uc008oid.1	chr2	179805297	179820607
no Peak	H13	uc008ngc.1	chr2	152495234	152532560
no Peak	H2-DMa	uc008cbm.1	chr17	34272126	34275480
no Peak	H2-K1	uc008cap.1	chr17	34132956	34137278
no Peak	H2-M3	uc008cmo.1	chr17	37407178	37411430
no Peak	H6pd	uc008vxi.1	chr4	149353589	149383132
no Peak	Hagh	uc008aym.1	chr17	24987491	25001395
no Peak	Hax1	uc008qaj.1	chr3	89799378	89802608
no Peak	Hcfc1	uc009tnm.1	chrX	71188133	71211654
no Peak	Hdac8	uc009typ.1	chrX	99479978	99700487
no Peak	Hdlbp	uc007cdy.1	chr1	95302516	95375385
no Peak	Heatr2	uc009afz.1	chr5	139626176	139662459
no Peak	Heatr5b	uc008dpc.1	chr17	79152245	79234721
no Peak	Heatr6	uc007kpu.1	chr11	83567138	83597256
no Peak	Hectd1	uc007nmz.1	chr12	52891468	52930340
no Peak	Hectd3	uc008uht.1	chr4	116667952	116677882
no Peak	Hel308	uc008yhz.1	chr5	101191166	101227619
no Peak	Herpud1	uc009mwg.1	chr8	96910399	96919258
no Peak	Hes6	uc007cat.1	chr1	93308058	93309799
no Peak	Hexim1	uc007lto.1	chr11	102977638	102981038
no Peak	Hexim2	uc007ltp.1	chr11	102994627	103001210
no Peak	Hiatl1	uc007qzc.1	chr13	65166337	65214290
no Peak	Hibadh	uc009byw.1	chr6	52496223	52590294
no Peak	Hif1an	uc008hpy.1	chr19	44637343	44650764
no Peak	Hint3	uc007etg.1	chr10	30328012	30338172
no Peak	Hipk3	uc008lju.1	chr2	104269920	104334401
no Peak	Hira	uc007yoq.1	chr16	18876842	18970401
no Peak	Hist1h1c	uc007puq.1	chr13	23830675	23832235
no Peak	Hivep1	uc007qfk.1	chr13	42147389	42280395
no Peak	Hivep2	uc007elg.1	chr10	13685882	13871184
no Peak	Hk1	uc007fgz.1	chr10	61732609	61842631
no Peak	Hmbox1	uc007uiq.1	chr14	65430437	65568684
no Peak	Hmg20a	uc009ptf.1	chr9	56266652	56344743
no Peak	Hmgb2	uc009lsx.1	chr8	59990672	59993284
no Peak	Hmgcr	uc007rnm.1	chr13	97419288	97440803
no Peak	Hmgn2	uc008vdq.1	chr4	133520653	133523906
no Peak	Hmmr	uc007ilt.1	chr11	40515257	40546924
no Peak	Hnrnpc	uc007tob.1	chr14	52694473	52723657
no Peak	Hnrpd	uc008ygt.1	chr5	100384954	100407957
no Peak	Hnrph2	uc009ugh.1	chrX	131135824	131141593
no Peak	Hnrpul1	uc009ftv.1	chr7	26507057	26539769
no Peak	Homer1	uc007rlc.1	chr13	94074753	94174078
no Peak	Hook1	uc008ttc.1	chr4	95634069	95690965
no Peak	Hp1bp3	uc008vkg.1	chr4	137772576	137799075
no Peak	Hpcal1	uc007ncw.1	chr12	17697619	17793354
no Peak	Hps5	uc009gzi.1	chr7	54015835	54051369
no Peak	Hras1	uc009kju.1	chr7	148375003	148379893
no Peak	Hs2st1	uc008rpp.1	chr3	144094076	144233103
no Peak	Hs6st1	uc007apn.1	chr1	36125253	36163291
no Peak	Hscb	uc008yrv.1	chr5	111258088	111268760
no Peak	Hsd17b11	uc008yjy.1	chr5	104418783	104450815
no Peak	Hsd17b12	uc008lgp.1	chr2	93872853	93998066
no Peak	Hsd17b4	uc008eww.1	chr18	50287992	50355920
no Peak	Hsdl2	uc008szz.1	chr4	59594462	59631566
no Peak	Hsp110	uc009apx.1	chr5	150416861	150438890
no Peak	Hspa14	uc008ief.1	chr2	3406125	3430086
no Peak	Hspa2	uc007nyf.1	chr12	77505162	77507923
no Peak	Hspa4	uc007ivq.1	chr11	53073315	53113981
no Peak	Hspa9	uc008elv.1	chr18	35097086	35113977
no Peak	Hspd1	uc007bab.1	chr1	55134678	55144689
no Peak	Hspe1	uc007bac.1	chr1	55145160	55148150
no Peak	Hyou1	uc009pdf.1	chr9	44187667	44200452
no Peak	Iars	uc007qjv.1	chr13	49777512	49829626
no Peak	Ick	uc009qtt.1	chr9	77956998	78015747
no Peak	Icos	uc007bfb.1	chr1	61034770	61055963
no Peak	Id2	uc007nfe.1	chr12	25778663	25780933
no Peak	Id3	uc008vhs.1	chr4	135699736	135701302
no Peak	Idh1	uc007bhn.1	chr1	65205201	65225688
no Peak	Ier2	uc009mmr.1	chr8	87183449	87186747
no Peak	Ier5	uc007dax.1	chr1	156944655	156946766
no Peak	Ifit2	uc008hgn.1	chr19	34625435	34651013
no Peak	Ifnar1	uc007zxo.1	chr16	91485493	91507686
no Peak	Ifngr1	uc007eng.1	chr10	19311763	19330031
no Peak	Ifngr2	uc007zxq.1	chr16	91547338	91564252
no Peak	Ifrd1	uc007nky.1	chr12	40929716	40949751
no Peak	Ift57	uc007zkf.1	chr16	49699406	49765239
no Peak	Ift80	uc008plx.1	chr3	68696430	68808387
no Peak	Ift88	uc007udb.1	chr14	58042962	58136773
no Peak	Igbp1	uc009tvz.1	chrX	97689683	97711340
no Peak	Igf2r	uc008aky.1	chr17	12875271	12962572
no Peak	Ighmbp2	uc008fwa.1	chr19	3259075	3283010
no Peak	Iigp2	uc007jat.1	chr11	58013057	58036277
no Peak	Ikbke	uc007cnf.1	chr1	133151178	133176140
no Peak	Ikzf3	uc007lgm.1	chr11	98326006	98407345
no Peak	Il10ra	uc009pfn.1	chr9	45061921	45077229
no Peak	Il12rb2	uc009cfo.1	chr6	67242011	67326131
no Peak	Il1rap	uc007yve.1	chr16	26581852	26716652
no Peak	Il20rb	uc009reu.1	chr9	100358139	100367294
no Peak	Il4ra	uc009jqb.1	chr7	132695795	132715794
no Peak	Immt	uc009chi.1	chr6	71781324	71825260
no Peak	Imp3	uc009ptq.1	chr9	56785306	56786205
no Peak	Imp4	uc007aor.1	chr1	34496744	34502592
no Peak	Impact	uc008eda.1	chr18	13130760	13151457
no Peak	Impdh1	uc009bdb.1	chr6	29150439	29166350
no Peak	Inadl	uc008tuc.1	chr4	98062516	98386294
no Peak	Incenp	uc008gos.1	chr19	9947166	9973965
no Peak	Ing1	uc009kvk.1	chr8	11555854	11563250
no Peak	Ing2	uc009lrf.1	chr8	48752531	48760512
no Peak	Ing3	uc009bat.1	chr6	21899614	21926037
no Peak	Inoc1	uc008ltt.1	chr2	119198778	119303365
no Peak	Inpp1	uc007ayo.1	chr1	52846265	52874381
no Peak	Inpp4b	uc009mjg.1	chr8	83866454	84648935
no Peak	Insig1	uc008wtu.1	chr5	28397906	28405201
no Peak	Insig2	uc007cjq.1	chr1	123200929	123229157
no Peak	Insr	uc009krd.2	chr8	3150921	3279617
no Peak	Ints10	uc009lwn.1	chr8	71317852	71351543
no Peak	Ints4	uc009iji.1	chr7	104629531	104689904
no Peak	Ints7	uc007ecp.1	chr1	193399612	193445570
no Peak	Ints9	uc007uiw.1	chr14	65568881	65658663
no Peak	Ipo8	uc009etl.1	chr6	148719205	148779989
no Peak	Ipo9	uc007cte.1	chr1	137278891	137327068
no Peak	Ipp	uc008ugp.1	chr4	116180153	116210840
no Peak	Iqcc	uc008uxs.1	chr4	129292860	129296337
no Peak	Iqgap1	uc009ibc.1	chr7	87857670	87948180
no Peak	Iqgap2	uc007rmo.1	chr13	96397131	96661877
no Peak	Iqwd1	uc007djb.1	chr1	167259631	167390418
no Peak	Irak4	uc007xjk.1	chr15	94374150	94398463
no Peak	Irf1	uc007iwy.1	chr11	53583579	53591876
no Peak	Irf2	uc009lqo.1	chr8	47825128	47932812
no Peak	Irgm	uc007ipg.1	chr11	48678750	48684848
no Peak	Irs2	uc009kuz.1	chr8	10986963	11008430
no Peak	Isca1	uc007qvd.1	chr13	59856775	59871150
no Peak	Iscu	uc008yyp.1	chr5	114222820	114228291
no Peak	Isg20l2	uc008ptj.1	chr3	87734235	87744608
no Peak	Isgf3g	uc007tzk.1	chr14	56223039	56228867
no Peak	Isoc1	uc008ezq.1	chr18	58819135	58839224
no Peak	Isy1	uc009cub.1	chr6	87768441	87788753
no Peak	Itch	uc008nkf.1	chr2	154959216	155052590
no Peak	Itgb2	uc007fvv.1	chr10	76993092	77028419
no Peak	Itpkb	uc007dwg.1	chr1	182260606	182353790
no Peak	Itpr1	uc009ddh.1	chr6	108163089	108501104
no Peak	Itpr2	uc009erw.1	chr6	146060001	146450434
no Peak	Ivd	uc008lsv.1	chr2	118687735	118707093
no Peak	Iws1	uc008eiy.1	chr18	32227417	32256962
no Peak	Jagn1	uc009dge.1	chr6	113392603	113398221
no Peak	Jak2	uc008hdb.1	chr19	29326317	29387570
no Peak	Jakmip1	uc008xfh.1	chr5	37438670	37496198
no Peak	Jarid1a	uc009dne.1	chr6	120314141	120369579
no Peak	Jarid1b	uc007csh.1	chr1	136456771	136529454
no Peak	Jmjd1a	uc009cgz.1	chr6	71539034	71582899
no Peak	Jmjd2b	uc008dbv.1	chr17	56465514	56542286
no Peak	Jmjd2c	uc008tjj.1	chr4	73897851	74051765
no Peak	Jun	uc008tsq.1	chr4	94715745	94718878
no Peak	Jup	uc007lkz.1	chr11	100231932	100259053
no Peak	Kbtbd2	uc009cbm.1	chr6	56727518	56747717
no Peak	Kbtbd3	uc009obj.1	chr9	4309834	4331711
no Peak	Kbtbd7	uc007usy.1	chr14	79826317	79830845
no Peak	Kcmf1	uc009cjd.1	chr6	72791107	72849973
no Peak	Kcnh2	uc008wrc.1	chr5	23825406	23857422
no Peak	Kcnmb4	uc007hbw.1	chr10	115854923	115910579
no Peak	Kctd18	uc007bbg.1	chr1	58012099	58059768
no Peak	Kctd1	uc008edo.1	chr18	15127193	15309955
no Peak	Kctd2	uc007mhn.1	chr11	115281463	115292586
no Peak	Kdelc1	uc007awb.1	chr1	44163390	44175618
no Peak	Khdrbs1	uc008uyd.1	chr4	129392102	129419526
no Peak	Kiaa0240	uc008cul.1	chr17	46935230	46969263
no Peak	Kiaa0241	uc009cbl.1	chr6	56664920	56711905
no Peak	Kif11	uc008hin.1	chr19	37450892	37496349
no Peak	Kif16b	uc008mpz.1	chr2	142444080	142727200
no Peak	Kif18a	uc008lmc.1	chr2	109120894	109181903
no Peak	Kif1c	uc007jwl.1	chr11	70514049	70545472
no Peak	Kif23	uc009pzu.1	chr9	61765300	61794564
no Peak	Kif2c	uc008uie.1	chr4	116832265	116855169
no Peak	Kif5b	uc008dzf.1	chr18	6202223	6241498
no Peak	Klf10	uc007vnr.1	chr15	38224167	38230462
no Peak	Klf6	uc007pjw.1	chr13	5860734	5869639
no Peak	Klhdc5	uc009esu.1	chr6	147039596	147061300
no Peak	Klhl11	uc007llj.1	chr11	100323925	100334096
no Peak	Klhl24	uc007yph.1	chr16	20097626	20127817
no Peak	Klhl28	uc007nqp.1	chr12	66043426	66066523
no Peak	Klhl6	uc007ypg.1	chr16	19946589	19983050
no Peak	Kntc1	uc008zoo.1	chr5	124199734	124271602
no Peak	Kpna4	uc008pme.1	chr3	68876142	68931014
no Peak	Kremen1	uc007hwh.1	chr11	5091555	5161613
no Peak	L3mbtl3	uc007esc.1	chr10	25995257	26095777
no Peak	l7Rn6	uc009igi.1	chr7	97067198	97089695
no Peak	Lace1	uc007eyq.1	chr10	42032390	42198371
no Peak	Lage3	uc009tor.1	chrX	71597500	71598957
no Peak	Lamc1	uc007czu.1	chr1	155066051	155179916
no Peak	Lamp2	uc009szv.1	chrX	35754537	35809632
no Peak	Lancl1	uc007bix.1	chr1	67047090	67085439
no Peak	Lancl2	uc009ccn.1	chr6	57652629	57688475
no Peak	Laptm4a	uc007naf.1	chr12	8928112	8945547
no Peak	Larp5	uc007pkr.1	chr13	9093150	9172336
no Peak	Larp7	uc008rhd.1	chr3	127239631	127256267
no Peak	Lars2	uc009sgd.1	chr9	123276057	123371782
no Peak	Las1l	uc009tud.1	chrX	93130651	93152298
no Peak	Lass6	uc008jxs.1	chr2	68699613	68949347
no Peak	Lat	uc009jqx.1	chr7	133507341	133513048
no Peak	Lax1	uc007cqt.1	chr1	135575674	135586593
no Peak	Lbh	uc008dng.1	chr17	73267665	73291282
no Peak	Lcmt1	uc009jpp.1	chr7	130521495	130573872
no Peak	Lcmt2	uc008lxn.1	chr2	120962992	120966389
no Peak	Lcp1	uc007uqm.1	chr14	75530965	75630610
no Peak	Ldb1	uc008hrz.1	chr19	46107090	46114111
no Peak	Ldha	uc009gzm.1	chr7	54101212	54110996
no Peak	Ldhb	uc009epj.1	chr6	142438768	142456463
no Peak	Lef1	uc008rjf.1	chr3	130813388	130926249
no Peak	Lemd3	uc007hfi.1	chr10	120360466	120416386
no Peak	Leng8	uc009exb.1	chr7	4088657	4092054
no Peak	Leo1	uc009qsh.1	chr9	75289330	75314239
no Peak	Letm1	uc008xbi.1	chr5	34084000	34125353
no Peak	Lgals3bp	uc007moz.1	chr11	118254065	118263245
no Peak	Lgals9	uc007kkd.1	chr11	78776896	78798333
no Peak	Lig4	uc009kul.1	chr8	9970019	9976323
no Peak	Lims1	uc007fcz.1	chr10	57786294	57887437
no Peak	Lin52	uc007ofl.1	chr12	85792457	85872483
no Peak	Lin7c	uc008lmp.1	chr2	109731034	109741093
no Peak	Lipa	uc008hgl.1	chr19	34566805	34601912
no Peak	Lman2	uc007qqo.1	chr13	55445193	55464144
no Peak	Lmbr1l	uc007xoi.1	chr15	98734351	98748529
no Peak	Lmbrd1	uc007amt.1	chr1	24685382	24823146
no Peak	Lmna	uc008pvj.1	chr3	88285070	88307229
no Peak	Lmnb1	uc008eyt.1	chr18	56867526	56913076
no Peak	Lmo4	uc008rpn.1	chr3	143851493	143867936
no Peak	Lnx2	uc009ant.1	chr5	147828678	147888105
no Peak	Lonp2	uc009mqm.1	chr8	89148005	89240535
no Peak	Lonrf1	uc009llj.1	chr8	37279117	37312570
no Peak	Lpin1	uc007nbu.1	chr12	16543441	16596576
no Peak	Lpin2	uc008dmc.1	chr17	71532945	71581646
no Peak	Lpxn	uc008guq.1	chr19	12873098	12908298
no Peak	Lrch1	uc007uqf.1	chr14	75154479	75347684
no Peak	Lrp10	uc007twd.1	chr14	55082983	55089128
no Peak	Lrp5	uc008fwq.1	chr19	3584876	3686554
no Peak	Lrp6	uc009ekl.1	chr6	134400434	134516931
no Peak	Lrpprc	uc008dtc.1	chr17	85104586	85190126
no Peak	Lrrc1	uc009qtk.1	chr9	77278895	77392659
no Peak	Lrrc28	uc009hin.1	chr7	74658296	74790117
no Peak	Lrrc33	uc007yyh.1	chr16	32142910	32165562
no Peak	Lrrc40	uc008rvu.1	chr3	157699666	157731442
no Peak	Lrrc57	uc008lwn.1	chr2	120429973	120435244
no Peak	Lrrc58	uc007zek.1	chr16	37868485	37888943
no Peak	Lrrc8b	uc008yle.1	chr5	105844793	105915208
no Peak	Lrrc8c	uc008ylf.1	chr5	105948489	106037973
no Peak	Lrrc8d	uc008ylg.1	chr5	106128987	106244228
no Peak	Lrrfip1	uc007bzt.1	chr1	92950083	93025495
no Peak	Lsg1	uc007ywv.1	chr16	30561454	30587675
no Peak	Lsm10	uc008usk.1	chr4	125773995	125775824
no Peak	Lsm12	uc007lqs.1	chr11	102024802	102046570
no Peak	Lsm14a	uc009gjd.1	chr7	35129738	35174559
no Peak	Lsm3	uc009cye.1	chr6	91466028	91472614
no Peak	Lsm4	uc009mbd.1	chr8	73197290	73202651
no Peak	Lsm6	uc009mif.1	chr8	81330349	81345039
no Peak	Lsm8	uc009bao.1	chr6	18798634	18804052
no Peak	Luc7l2	uc009bko.1	chr6	38501518	38559444
no Peak	Luc7l	uc008beb.1	chr17	26389854	26422449
no Peak	Ly6d	uc007wfx.1	chr15	74592485	74593997
no Peak	Ly75	uc008jud.1	chr2	60131816	60221288
no Peak	Ly96	uc007ajz.1	chr1	16678536	16699680
no Peak	Lycat	uc008dnh.1	chr17	73457333	73592706
no Peak	Lyst	uc007pmj.1	chr13	13682675	13869707
no Peak	Mad2l1bp	uc008cru.1	chr17	46284337	46290485
no Peak	Mad2l1	uc009ceo.1	chr6	66485461	66491014
no Peak	Maea	uc008xaq.1	chr5	33678220	33715943
no Peak	Maf1	uc007wjw.1	chr15	76181735	76184803
no Peak	Magi3	uc008qua.1	chr3	103819185	104023950
no Peak	Malt1	uc008ffa.1	chr18	65590650	65638446
no Peak	Man1a	uc007fbw.1	chr10	53625838	53795602
no Peak	Man2a1	uc008dfy.1	chr17	64950988	65104450
no Peak	Man2a2	uc009iap.1	chr7	87494678	87516012
no Peak	Man2b1	uc009mpk.1	chr8	87607167	87622638
no Peak	Manbal	uc008noz.1	chr2	157193353	157222498
no Peak	Manba	uc008rlv.1	chr3	135148631	135234367
no Peak	Manea	uc008sej.1	chr4	26251652	26273799
no Peak	Maoa	uc009ssa.1	chrX	16196823	16264844
no Peak	Map2k1	uc009qbp.1	chr9	64033599	64101412
no Peak	Map2k5	uc009qaw.1	chr9	63011576	63225659
no Peak	Map2k6	uc007mdr.1	chr11	110260435	110374951
no Peak	Map3k1	uc007rwa.1	chr13	112536642	112599191
no Peak	Map3k7	uc008seq.1	chr4	32051096	32107767
no Peak	Mapk14	uc008brl.1	chr17	28828389	28885350
no Peak	Mapk1ip1	uc009kfc.1	chr7	146027500	146037950
no Peak	Mapk1	uc007yjr.1	chr16	16983474	17047546
no Peak	Mapk6	uc009qse.1	chr9	75234707	75257821
no Peak	Mapk9	uc007irf.1	chr11	49660255	49699598
no Peak	Mapkap1	uc008jil.1	chr2	34262301	34480470
no Peak	Mapkapk3	uc009rky.1	chr9	107157257	107192208
no Peak	Mapre2	uc008ege.1	chr18	23912225	24052352
no Peak	Marcks	uc007evg.1	chr10	36853048	36858732
no Peak	Mark3	uc007pdk.1	chr12	112813181	112894432
no Peak	Mars2	uc007baj.1	chr1	55294020	55296902
no Peak	Mast2	uc008ugn.1	chr4	115979366	116136788
no Peak	Mastl	uc008iob.1	chr2	22973584	23011436
no Peak	Mat2b	uc007ilq.1	chr11	40492815	40508443
no Peak	Mbc2	uc007hng.1	chr10	127947305	127962915
no Peak	Mbd2	uc008fon.1	chr18	70727841	70785784
no Peak	Mbd3	uc007gdb.1	chr10	79855285	79862224
no Peak	Mbd4	uc009dje.1	chr6	115792445	115803739
no Peak	Mbip	uc007npc.1	chr12	57429307	57446855
no Peak	Mbnl2	uc007uzt.1	chr14	120674890	120830920
no Peak	Mbp	uc008fts.1	chr18	82644514	82755029
no Peak	Mbtps1	uc009nps.1	chr8	122032054	122082627
no Peak	Mbtps2	uc009usb.1	chrX	153985753	154036647
no Peak	Mcart1	uc008ssr.1	chr4	45408937	45421618
no Peak	Mcart6	uc009ujp.1	chrX	133535593	133572841
no Peak	Mccc1	uc008oyy.1	chr3	35858758	35899553
no Peak	Mcee	uc009hgi.1	chr7	71537656	71557005
no Peak	Mcl1	uc008qkl.1	chr3	95462642	95467101
no Peak	Mcm2	uc009cvx.1	chr6	88833468	88848691
no Peak	Mcm3ap	uc007fup.1	chr10	75931715	75978602
no Peak	Mcm4	uc007yhr.1	chr16	15624195	15637449
no Peak	Mcm5	uc009mhd.1	chr8	77633426	77652338
no Peak	Mcm6	uc007cln.1	chr1	130228167	130256233
no Peak	Mcoln3	uc008rqx.1	chr3	145784754	145803610
no Peak	Mcph1	uc009kzt.1	chr8	18595172	18803188
no Peak	Mcts1	uc009tad.1	chrX	35953834	35966699
no Peak	Mdh1	uc007idv.1	chr11	21456789	21471833
no Peak	Mdh2	uc008zyz.1	chr5	136254518	136266256
no Peak	Mdm1	uc007hdt.1	chr10	117578887	117606053
no Peak	Mdm2	uc007hdm.1	chr10	117125960	117147772
no Peak	Mdn1	uc008sfa.1	chr4	32744093	32862192
no Peak	Me2	uc008fox.1	chr18	73929693	73975046
no Peak	Mecp2	uc009tnt.1	chrX	71272160	71330975
no Peak	Med10	uc007rcq.1	chr13	69948759	69954972
no Peak	Med21	uc009esg.1	chr6	146591100	146599122
no Peak	Med22	uc008iwd.1	chr2	26760786	26766162
no Peak	Med27	uc008izs.1	chr2	29202355	29380308
no Peak	Med6	uc007ocl.1	chr12	82674550	82695945
no Peak	Med7	uc007iok.2	chr11	46250448	46256223
no Peak	Med8	uc008ujv.1	chr4	118081941	118088387
no Peak	Megf9	uc008tib.1	chr4	70092960	70195962
no Peak	Mesdc2	uc009idx.1	chr7	91040766	91050042
no Peak	Mett10d	uc007kci.1	chr11	74584364	74632194
no Peak	Mettl4	uc008dwl.1	chr17	95126419	95149359
no Peak	Mettl6	uc007sxq.1	chr14	32291983	32308163
no Peak	Mettl8	uc008jzv.1	chr2	70802620	70893584
no Peak	Mettl9	uc009jnk.1	chr7	128177958	128220349
no Peak	Mex3c	uc008fot.1	chr18	73733074	73752229
no Peak	Mfap1a	uc008lzh.1	chr2	121318416	121332392
no Peak	Mfhas1	uc009lla.1	chr8	36650851	36742503
no Peak	Mfn2	uc008vti.1	chr4	147247703	147278928
no Peak	Mfng	uc007wri.1	chr15	78586312	78603875
no Peak	Mgat1	uc007iqb.1	chr11	49057747	49076526
no Peak	Mgat4a	uc007arv.1	chr1	37501406	37597858
no Peak	MGC107415	uc008arl.1	chr17	22063929	22099431
no Peak	Mgea5	uc008hrp.1	chr19	45841883	45858269
no Peak	Mgst2	uc008ped.1	chr3	51465114	51486597
no Peak	Mis12	uc007jxn.1	chr11	70833112	70840636
no Peak	Mizf	uc009pcr.1	chr9	44103755	44113712
no Peak	Mki67	uc009kel.1	chr7	142881466	142890771
no Peak	mKIAA0694	uc007brg.1	chr1	80563866	80755102
no Peak	mKIAA0892	uc009lyj.1	chr8	72542465	72566633
no Peak	mKIAA0904	uc007lfu.1	chr11	98064627	98112681
no Peak	mKIAA4191	uc007xek.1	chr15	88517729	88561134
no Peak	Mkks	uc008mot.1	chr2	136699799	136717118
no Peak	Mknk1	uc008ufm.1	chr4	115511850	115551853
no Peak	Mkrn1	uc009blr.1	chr6	39347819	39370368
no Peak	Mlh1	uc009rvp.1	chr9	111130758	111174066
no Peak	Mll5	uc008wqb.1	chr5	22988219	23004099
no Peak	Mllt3	uc008tmp.1	chr4	87415828	87679311
no Peak	Mmaa	uc009mim.1	chr8	81790322	81818579
no Peak	Mmd	uc007kwo.1	chr11	90048996	90139887
no Peak	Mnat1	uc007nwe.1	chr12	74224703	74374975
no Peak	Moap1	uc007ouk.2	chr12	103979926	103996882
no Peak	Mobkl2a	uc007geh.1	chr10	80147997	80164565
no Peak	Mobkl3	uc007bad.1	chr1	55188088	55211743
no Peak	Mon2	uc007hgk.1	chr10	122432404	122513081
no Peak	Morc2a	uc007htm.1	chr11	3549496	3590375
no Peak	Morf4l1	uc009qzw.1	chr9	89986506	90009600
no Peak	Morf4l2	uc009uiw.1	chrX	133267489	133278224
no Peak	Mospd1	uc009tfa.1	chrX	50698197	50723669
no Peak	Mospd3	uc009ada.1	chr5	138037874	138042268
no Peak	Mphosph10	uc009hgg.1	chr7	71521426	71537122
no Peak	Mphosph1	uc008hgz.1	chr19	34996847	35050221
no Peak	Mphosph9	uc008zph.1	chr5	124700967	124778460
no Peak	Mpp7	uc008dzs.1	chr18	7350734	7626861
no Peak	Mpst	uc007wpe.1	chr15	78237533	78244440
no Peak	Mre11a	uc009ofc.1	chr9	14589150	14638861
no Peak	Mrfap1	uc008xfa.1	chr5	37186105	37187943
no Peak	Mrm1	uc007kqr.1	chr11	84626562	84633017
no Peak	Mrpl14	uc008crj.1	chr17	45823320	45835444
no Peak	Mrpl15	uc007afd.1	chr1	4764014	4775768
no Peak	Mrpl1	uc008yfi.1	chr5	96639133	96695728
no Peak	Mrpl21	uc008fwe.1	chr19	3283046	3292837
no Peak	Mrpl22	uc007jap.1	chr11	57985162	57993067
no Peak	Mrpl28	uc008bdl.1	chr17	26260476	26263558
no Peak	Mrpl30	uc007asj.1	chr1	37947397	37955178
no Peak	Mrpl32	uc007pnk.1	chr13	14702567	14705304
no Peak	Mrpl35	uc009chd.1	chr6	71765101	71773771
no Peak	Mrpl36	uc007rdi.1	chr13	73468456	73469626
no Peak	Mrpl37	uc008tza.1	chr4	106728486	106739450
no Peak	Mrpl38	uc007mke.1	chr11	115999095	116000182
no Peak	Mrpl39	uc007zte.1	chr16	84718525	84735426
no Peak	Mrpl40	uc007yop.1	chr16	18872309	18876730
no Peak	Mrpl50	uc008svu.1	chr4	49525468	49533955
no Peak	Mrpl9	uc008qgj.1	chr3	94247257	94252630
no Peak	Mrps16	uc007sjp.1	chr14	21210452	21212777
no Peak	Mrps21	uc008qlj.1	chr3	95666574	95675407
no Peak	Mrps23	uc007kvi.1	chr11	88017919	88025009
no Peak	Mrps24	uc007hwt.1	chr11	5603985	5607702
no Peak	Mrps28	uc008ooq.1	chr3	8802153	8923823
no Peak	Mrps30	uc007ryr.1	chr13	119168916	119176059
no Peak	Mrps31	uc009ldc.1	chr8	23521891	23539949
no Peak	Mrps6	uc007zyu.1	chr16	92058566	92112472
no Peak	Mrps9	uc007ava.1	chr1	42908127	42962525
no Peak	Ms4a4b	uc008gsf.1	chr19	11518047	11538038
no Peak	Msh2	uc008dvb.1	chr17	88071896	88123053
no Peak	Msh3	uc007rkj.1	chr13	92981835	93124958
no Peak	Msl31	uc009uxh.1	chrX	165092049	165111834
no Peak	Msn	uc009tug.1	chrX	93291383	93363892
no Peak	Msrb2	uc008imf.1	chr2	19293262	19316597
no Peak	Mta3	uc008dsj.1	chr17	84105548	84220856
no Peak	Mtap7d1	uc008usz.1	chr4	125909411	125933527
no Peak	Mtbp	uc007vsi.1	chr15	55388962	55457978
no Peak	Mtch2	uc008ktn.1	chr2	90687311	90706791
no Peak	Mtcp1	uc009tpv.1	chrX	72650185	72661882
no Peak	Mtf2	uc008ynk.1	chr5	108494760	108538021
no Peak	Mtfr1	uc008orp.1	chr3	19087328	19120805
no Peak	Mthfd1	uc007nxz.1	chr12	77356394	77420790
no Peak	Mthfr	uc008vty.1	chr4	147415330	147433660
no Peak	Mthfsd	uc009nrp.1	chr8	123621839	123632218
no Peak	Mtmr9	uc007uht.1	chr14	64142446	64162790
no Peak	Mtpn	uc009bit.1	chr6	35458905	35489787
no Peak	Mtrf1l	uc007egi.1	chr10	4522597	4534654
no Peak	Mtr	uc007plh.1	chr13	12279085	12350267
no Peak	Mtss1	uc007vty.1	chr15	58774801	58913544
no Peak	Mut	uc008coo.1	chr17	41071673	41097848
no Peak	Mvp	uc009jtw.1	chr7	134130381	134158106
no Peak	Mybl1	uc007agq.1	chr1	9658915	9690290
no Peak	Myc	uc007vyg.1	chr15	61816895	61821916
no Peak	Myd88	uc009sar.1	chr9	119245105	119249158
no Peak	Myh9	uc007woc.1	chr15	77591018	77672545
no Peak	Mynn	uc008oux.1	chr3	30501008	30517416
no Peak	Myo1c	uc007kem.1	chr11	75465010	75488136
no Peak	Myo1g	uc007hyt.1	chr11	6406554	6420961
no Peak	Myo9b	uc009mck.1	chr8	73796612	73884611
no Peak	Mysm1	uc008tsn.1	chr4	94608731	94645791
no Peak	Myst2	uc007lae.1	chr11	95135572	95171515
no Peak	Myst3	uc009lec.1	chr8	23970010	24053734
no Peak	N6amt2	uc007udd.1	chr14	58168434	58190406
no Peak	Nabp1	uc007axm.1	chr1	51522850	51535243
no Peak	Naca	uc007hlc.1	chr10	127472628	127485689
no Peak	Nadk	uc008wdt.1	chr4	154936512	154965100
no Peak	Naga	uc007wyw.1	chr15	82159969	82169225
no Peak	Napg	uc008fdp.1	chr18	63137569	63159104
no Peak	Narg1l	uc007usv.1	chr14	79734313	79790475
no Peak	Narg1	uc008pdz.1	chr3	51220063	51277953
no Peak	Nars2	uc009iiw.1	chr7	104100036	104213265
no Peak	Nars	uc008fek.1	chr18	64659311	64676191
no Peak	Nat10	uc008liy.1	chr2	103561415	103601407
no Peak	Nat13	uc007zgz.1	chr16	44139921	44163477
no Peak	Nat2	uc009lvw.1	chr8	70018765	70026469
no Peak	Nck1	uc009rex.1	chr9	100395421	100446472
no Peak	Nck2	uc007avn.1	chr1	43502595	43519067
no Peak	Ncln	uc007gig.1	chr10	80949203	80959108
no Peak	Ncoa2	uc007aim.1	chr1	13129239	13364164
no Peak	Ncor1	uc007jjb.1	chr11	62198284	62271308
no Peak	Ncstn	uc007dpk.1	chr1	173996228	174012825
no Peak	Ndel1	uc007jod.1	chr11	68634948	68666555
no Peak	Ndor1	uc008iqw.1	chr2	25100338	25110934
no Peak	Ndrg1	uc007wax.1	chr15	66760879	66801203
no Peak	Ndrg2	uc007tnk.1	chr14	52524955	52533026
no Peak	Ndufa10	uc007cbh.1	chr1	94336295	94370335
no Peak	Ndufa11	uc008dcz.1	chr17	56857203	56861558
no Peak	Ndufa12	uc007gvq.1	chr10	93661753	93683693
no Peak	Ndufa13	uc009lyd.1	chr8	72418080	72426457
no Peak	Ndufa4	uc009ayd.1	chr6	11850372	11857446
no Peak	Ndufa7	uc008bzu.1	chr17	33961558	33975258
no Peak	Ndufa9	uc009dve.1	chr6	126771972	126799143
no Peak	Ndufb11	uc009ste.1	chrX	20192451	20194383
no Peak	Ndufb3	uc007bck.1	chr1	58643442	58652792
no Peak	Ndufc2	uc009ijd.1	chr7	104548601	104556306
no Peak	Ndufs3	uc008ktr.1	chr2	90734792	90744878
no Peak	Ndufs4	uc007rxm.1	chr13	115078857	115178251
no Peak	Ndufs5	uc008upu.1	chr4	123389952	123395429
no Peak	Ndufs6	uc007rdh.1	chr13	73457323	73465903
no Peak	Nebl	uc008ila.1	chr2	17268360	17652695
no Peak	Necap2	uc008vnu.1	chr4	140622431	140634248
no Peak	Nedd1	uc007gud.1	chr10	92147490	92185105
no Peak	Nedd4l	uc008fen.1	chr18	65048682	65372961
no Peak	Nedd4	uc009qqe.1	chr9	72510153	72597655
no Peak	Nedd9	uc007qfe.1	chr13	41406804	41582662
no Peak	Neil3	uc009lsa.1	chr8	54672220	54724350
no Peak	Nek1	uc009ltu.1	chr8	63472016	63609031
no Peak	Nek3	uc009lcr.1	chr8	23238754	23276872
no Peak	Nek7	uc007cvn.1	chr1	140381290	140516273
no Peak	Neu3	uc009imc.1	chr7	106959948	106976927
no Peak	Nf1	uc007kkl.1	chr11	79153393	79395111
no Peak	Nf2	uc007hvg.1	chr11	4665850	4749530
no Peak	Nfat5	uc009nhn.1	chr8	109817761	109903417
no Peak	Nfatc2ip	uc009jra.1	chr7	133526367	133540251
no Peak	Nfe2l2	uc008keq.1	chr2	75513575	75542698
no Peak	Nfil3	uc007qni.1	chr13	53062577	53076408
no Peak	Nfkbia	uc007nor.1	chr12	56590845	56593570
no Peak	Nfkbib	uc009fzr.1	chr7	29543269	29551543
no Peak	Nfkbiz	uc007zln.1	chr16	55811490	55838967
no Peak	Nfrkb	uc009orr.1	chr9	31193796	31228918
no Peak	Nfs1	uc008nmj.1	chr2	155949384	155969921
no Peak	Nfu1	uc009csv.1	chr6	86959897	86978409
no Peak	Nfxl1	uc008xrl.1	chr5	72904542	72950884
no Peak	Nfya	uc008cxs.1	chr17	48527259	48549046
no Peak	Nfyb	uc007gjv.1	chr10	82211444	82226886
no Peak	Nfyc	uc008unp.1	chr4	120430039	120504180
no Peak	Ngdn	uc007txx.1	chr14	55634361	55642974
no Peak	Ngly1	uc007sgz.1	chr14	17081827	17144440
no Peak	Nhej1	uc007bnn.1	chr1	75013923	75121800
no Peak	Nhsl1	uc007emi.1	chr10	18127480	18253697
no Peak	Nin	uc007ntf.1	chr12	71112421	71203841
no Peak	Nkrf	uc009sxw.1	chrX	34427536	34442894
no Peak	Nktr	uc009sdr.1	chr9	121628298	121665959
no Peak	Nmd3	uc008pml.1	chr3	69525976	69552968
no Peak	Nmi	uc008jqo.1	chr2	51804024	51828608
no Peak	Nmral1	uc007yae.1	chr16	4711317	4719059
no Peak	Nob1	uc009nhr.1	chr8	109936388	109948938
no Peak	Nol10	uc007ncu.1	chr12	17355298	17436901
no Peak	Nol5	uc007bdy.1	chr1	59741849	59768354
no Peak	Nomo1	uc009gyb.1	chr7	53289189	53339574
no Peak	Npal1	uc008xrv.1	chr5	73039034	73062317
no Peak	Npat	uc009pmf.1	chr9	53345151	53383732
no Peak	Npc2	uc007oft.1	chr12	86095508	86114062
no Peak	Npepps	uc007ldv.1	chr11	97067170	97141890
no Peak	Npm1	uc007ikd.1	chr11	33052510	33063056
no Peak	Npm3	uc008hrk.1	chr19	45822223	45824053
no Peak	Nr3c1	uc008esz.1	chr18	39584036	39649430
no Peak	Nr4a1	uc007xsv.1	chr15	101097292	101105223
no Peak	Nr4a3	uc008suu.1	chr4	48058102	48096224
no Peak	Nrf1	uc009bev.1	chr6	29997987	30103458
no Peak	Nrp1	uc009nzt.1	chr8	130882998	131027247
no Peak	Nsbp1	uc009ucs.1	chrX	106199875	106208719
no Peak	Nsdhl	uc009tkv.1	chrX	70163859	70203867
no Peak	Nsf	uc007lvt.1	chr11	103683096	103815370
no Peak	Nsg2	uc007iiw.1	chr11	31900458	31959202
no Peak	Nsmce1	uc009jqa.1	chr7	132611157	132635049
no Peak	Nsmce2	uc007vxv.1	chr15	59205801	59433236
no Peak	Nsun6	uc008ikv.1	chr2	14916757	14976511
no Peak	Nt5c2	uc008hui.1	chr19	46962318	47089643
no Peak	Nt5c3	uc009cbr.1	chr6	56832398	56873823
no Peak	Nucks1	uc007cnx.1	chr1	133807110	133829549
no Peak	Nudcd1	uc007vpq.1	chr15	44206776	44259434
no Peak	Nudcd2	uc007ily.1	chr11	40547143	40553549
no Peak	Nudt14	uc007pfm.1	chr12	114172943	114180329
no Peak	Nudt16	uc009rhw.1	chr9	105031667	105034135
no Peak	Nudt21	uc009mvo.1	chr8	96543302	96560939
no Peak	Nuf2	uc007dlk.1	chr1	171428064	171461595
no Peak	Nufip1	uc007ure.1	chr14	76510697	76537186
no Peak	Nup107	uc007hdo.1	chr10	117187698	117229761
no Peak	Nup153	uc007qhj.1	chr13	46775470	46822956
no Peak	Nup160	uc008ksw.1	chr2	90517371	90576485
no Peak	Nup210	uc009cxu.1	chr6	90963063	91066788
no Peak	Nup98	uc009iqy.1	chr7	109282716	109358634
no Peak	Nupl1	uc007uex.1	chr14	60824120	60870215
no Peak	Nusap1	uc008lua.1	chr2	119444033	119475896
no Peak	Nvl	uc007dxb.1	chr1	183023553	183074288
no Peak	Nwd1	uc009mgj.1	chr8	75095996	75231971
no Peak	Nxt1	uc008mtf.1	chr2	148498377	148501759
no Peak	Oat	uc009kcb.1	chr7	139749157	139768081
no Peak	Obfc1	uc008hvb.1	chr19	47575537	47611510
no Peak	Ociad1	uc008xsu.1	chr5	73684065	73705323
no Peak	Odc1	uc007ncv.1	chr12	17551678	17558308
no Peak	Odf2l	uc008rqk.1	chr3	144781563	144816849
no Peak	Ogdh	uc007hyg.1	chr11	6191599	6259096
no Peak	Ogt	uc009tyc.1	chrX	98835402	98879688
no Peak	Oip5	uc008ltz.1	chr2	119435267	119444241
[truncated: 1,189 more rows]

## Sheet: HumanCD4+
Peak Group	GeneSymbol	transcriptId	chrom	lxStart	lxEnd
RNAP II total no Ser5P	EFHD2	uc001awh.2	chr1	15736390	15756839
RNAP II total no Ser5P	SIRT1	uc001jnd.2	chr10	69644426	69678146
RNAP II total no Ser5P	CLN8	uc003wpo.3	chr8	1711869	1734735
RNAP II total no Ser5P	NCOR2	uc010tay.1	chr12	124808961	125020157
RNAP II total no Ser5P	NBL1	uc009vpl.1	chr1	19923466	19984945
RNAP II total no Ser5P	LITAF	uc002dba.2	chr16	11641581	11680806
RNAP II total no Ser5P	SPTBN1	uc002rxv.1	chr2	54684397	54856940
RNAP II total no Ser5P	CASS4	uc002xxp.2	chr20	54987167	55034396
RNAP II total no Ser5P	RCC2	uc001bam.2	chr1	17733251	17766220
RNAP II total no Ser5P	CLPTM1L	uc003jch.2	chr5	1318006	1345002
RNAP II total no Ser5P	CCDC88C	uc010twk.1	chr14	91805453	91883182
RNAP II total no Ser5P	ZNF445	uc003cnf.2	chr3	44481261	44519162
RNAP II total no Ser5P	ST3GAL5	uc002sqp.1	chr2	86066270	86094793
RNAP II total no Ser5P	GNB1	uc001aif.2	chr1	1716729	1822495
RNAP II total no Ser5P	CUGBP2	uc001ikl.3	chr10	11059892	11378670
RNAP II total no Ser5P	SEMA4D	uc004aqp.1	chr9	91992151	92112888
RNAP II total no Ser5P	ZC3HAV1	uc003vun.2	chr7	138728267	138794465
RNAP II total no Ser5P	RASA3	uc001vuj.2	chr13	114747194	114898095
RNAP II total no Ser5P	BAG3	uc001lem.2	chr10	121410881	121437327
RNAP II total no Ser5P	MYO1G	uc003tmh.2	chr7	45002259	45018704
RNAP II total no Ser5P	PLEC1	uc003zaj.2	chr8	144989320	145050913
RNAP II total no Ser5P	PPP2R5C	uc001ykj.3	chr14	102228134	102302907
RNAP II total no Ser5P	AXIN2	uc002jfi.2	chr17	63524684	63557740
RNAP II total no Ser5P	RARA	uc002huk.1	chr17	38465445	38513894
RNAP II total no Ser5P	PRKCH	uc001xfn.2	chr14	61788514	62017695
RNAP II total no Ser5P	MED15	uc002zsp.2	chr22	20861885	20941918
RNAP II total no Ser5P	BCL11B	uc001yga.2	chr14	99635626	99737822
RNAP II total no Ser5P	TACC3	uc003gdo.2	chr4	1723265	1746895
RNAP II total no Ser5P	RNF24	uc002wki.2	chr20	3912068	3996216
RNAP II total no Ser5P	ETF1	uc003ldc.3	chr5	137841787	137878932
RNAP II total no Ser5P	CDC42SE2	uc003kvi.2	chr5	130599701	130730380
RNAP II total no Ser5P	SLC38A1	uc001rpd.2	chr12	46576842	46663208
RNAP II total no Ser5P	C21orf33	uc002zec.3	chr21	45553493	45565604
RNAP II total no Ser5P	TMEM173	uc003lep.2	chr5	138855549	138862292
RNAP II total no Ser5P	FGD3	uc004asw.2	chr9	95709600	95798518
RNAP II total no Ser5P	HSPC157	uc001bfm.3	chr1	22351706	22357713
RNAP II total no Ser5P	STAT4	uc002uso.2	chr2	191896851	192015740
RNAP II total no Ser5P	EHD1	uc001obv.1	chr11	64620207	64647149
RNAP II total no Ser5P	SLC7A5	uc002fkm.2	chr16	87863629	87903100
RNAP II total no Ser5P	TSPAN14	uc001kcj.3	chr10	82214037	82282390
RNAP II total no Ser5P	LSM14B	uc002ybv.2	chr20	60697516	60708531
RNAP II total no Ser5P	IL16	uc010blq.1	chr15	81475092	81598886
RNAP II total no Ser5P	ICOS	uc002vam.2	chr2	204801470	204826296
RNAP II total no Ser5P	KLF13	uc001zfo.2	chr15	31619082	31670101
RNAP II total no Ser5P	IL12RB1	uc002nhx.1	chr19	18170370	18209626
RNAP II total no Ser5P	C11orf58	uc010rct.1	chr11	16760147	16779901
RNAP II total no Ser5P	ATP8B2	uc001fex.2	chr1	154300275	154323779
RNAP II total no Ser5P	PANX1	uc001per.2	chr11	93862093	93915135
RNAP II total no Ser5P	ZMYM6	uc001byh.2	chr1	35451768	35497569
RNAP II total no Ser5P	MYH9	uc003apg.2	chr22	36677323	36784063
RNAP II total no Ser5P	MAPRE2	uc010xcb.1	chr18	32556891	32722377
RNAP II total no Ser5P	IQSEC1	uc011auw.1	chr3	12938718	13114617
RNAP II total no Ser5P	HECA	uc003qin.2	chr6	139456248	139501945
RNAP II total no Ser5P	RNMT	uc002ksl.1	chr18	13726703	13764554
RNAP II total no Ser5P	CRNKL1	uc002wrt.1	chr20	20028408	20036690
RNAP II total no Ser5P	PTPRE	uc010qup.1	chr10	129785543	129866550
RNAP II total no Ser5P	TGIF1	uc002klu.2	chr18	3412071	3458404
RNAP II total no Ser5P	RAPGEF1	uc010mzn.2	chr9	134467483	134615217
RNAP II total no Ser5P	TGFBR2	uc003cen.2	chr3	30647993	30735631
RNAP II total no Ser5P	MYLIP	uc003nbq.2	chr6	16129316	16148476
RNAP II total no Ser5P	SEPT6	uc004ers.2	chrX	118749689	118827333
RNAP II total no Ser5P	COG5	uc003vee.2	chr7	106848297	107204959
RNAP II total no Ser5P	MYST3	uc010lxb.2	chr8	41786997	41909505
RNAP II total no Ser5P	DAD1	uc001wgl.2	chr14	23033806	23058143
RNAP II total no Ser5P	HIP1R	uc001udg.1	chr12	123319294	123342447
RNAP II total no Ser5P	HERPUD1	uc002eke.1	chr16	56965747	56977793
RNAP II total no Ser5P	PDXK	uc002zdm.3	chr21	45138977	45182187
RNAP II total no Ser5P	RP5-1022P6.2	uc002wme.3	chr20	5525080	5591672
RNAP II total no Ser5P	SAE1	uc010ekw.2	chr19	47634079	47713892
RNAP II total no Ser5P	SETX	uc004cbk.2	chr9	135136827	135230372
RNAP II total no Ser5P	PPP1R15A	uc002pky.3	chr19	49375648	49379318
RNAP II total no Ser5P	TNFRSF1B	uc001att.2	chr1	12227059	12269276
RNAP II total no Ser5P	HIPK1	uc001eel.2	chr1	114471995	114514693
RNAP II total no Ser5P	LAPTM5	uc001bsc.2	chr1	31205314	31230683
RNAP II total no Ser5P	TMEM57	uc001bkk.2	chr1	25757387	25826696
RNAP II total no Ser5P	PPIL4	uc010kic.2	chr6	149768794	149867171
RNAP II total no Ser5P	PSMD7	uc010vmr.1	chr16	74330680	74340184
RNAP II total no Ser5P	TAPBP	uc003odz.2	chr6	33271417	33281989
RNAP II total no Ser5P	AK124173	uc003qhq.1	chr6	138144811	138189370
RNAP II total no Ser5P	PIK3R1	uc003jva.2	chr5	67511603	67597647
RNAP II total no Ser5P	CD44	uc001mvu.2	chr11	35160416	35253946
RNAP II total no Ser5P	NFKBIL1	uc011dnr.1	chr6	31514627	31526605
RNAP II total no Ser5P	ADCY7	uc002egc.1	chr16	50300461	50344439
RNAP II total no Ser5P	UBE2N	uc001tcp.2	chr12	93802089	93836026
RNAP II total no Ser5P	INPP5D	uc010zmo.1	chr2	233925035	234116548
RNAP II total no Ser5P	DIDO1	uc002ydr.1	chr20	61509089	61557855
RNAP II total no Ser5P	SFRS2IP	uc001rox.2	chr12	46312915	46384401
RNAP II total no Ser5P	DUS2L	uc002evi.2	chr16	68057203	68113183
RNAP II total no Ser5P	ETV3	uc001fqr.2	chr1	157094458	157108383
RNAP II total no Ser5P	WDR26	uc001hoq.3	chr1	224572846	224621732
RNAP II total no Ser5P	MED16	uc010xfw.1	chr19	873448	891149
RNAP II total no Ser5P	AKNA	uc004biw.1	chr9	117138077	117160752
RNAP II total no Ser5P	NLRP1	uc002gci.2	chr17	5417438	5487832
RNAP II total no Ser5P	CALM2	uc002rvt.2	chr2	47387220	47403740
RNAP II total no Ser5P	BC033836	uc002pik.2	chr19	48758945	48761444
RNAP II total no Ser5P	H2AFV	uc003tlz.2	chr7	44866487	44887725
RNAP II total no Ser5P	SC5DL	uc001pxu.2	chr11	121163387	121184117
RNAP II total no Ser5P	CYB561D1	uc010ovm.1	chr1	110036657	110043062
RNAP II total no Ser5P	MAPK1IP1L	uc001xbq.1	chr14	55518361	55536912
RNAP II total no Ser5P	DDX56	uc003tlg.2	chr7	44605403	44614137
RNAP II total no Ser5P	HSPA9	uc003ldf.2	chr5	137891024	137911115
RNAP II total no Ser5P	USPL1	uc001utc.2	chr13	31191829	31233686
RNAP II total no Ser5P	MX2	uc002yze.1	chr21	42733949	42739233
RNAP II total no Ser5P	SDF4	uc001adh.3	chr1	1152288	1167447
RNAP II total no Ser5P	EEF2	uc002lze.2	chr19	3976054	3985461
RNAP II total no Ser5P	ATP2A2	uc001tql.3	chr12	110719031	110788895
RNAP II total no Ser5P	HCP5	uc003ntl.2	chr6	31430956	31433584
RNAP II total no Ser5P	NOSIP	uc002pok.2	chr19	50058969	50083803
RNAP II total no Ser5P	NACA	uc001sma.2	chr12	57106210	57119326
RNAP II total no Ser5P	SAP18	uc001uns.2	chr13	21714652	21723223
RNAP II total no Ser5P	U2AF1	uc002zcz.1	chr21	44513065	44527688
RNAP II total no Ser5P	CD7	uc010wvk.1	chr17	80274007	80275480
RNAP II total no Ser5P	DDX17	uc011anu.1	chr22	38886318	38903665
RNAP II total no Ser5P	CDC37	uc002mof.1	chr19	10501808	10514271
RNAP II total no Ser5P	ARPP19	uc002ace.1	chr15	52839431	52861364
RNAP II total no Ser5P	SARS	uc001dwv.1	chr1	109756539	109780785
RNAP II total no Ser5P	C19orf53	uc002mxg.2	chr19	13885256	13889584
RNAP II total no Ser5P	C11orf68	uc009yqv.2	chr11	65684283	65686531
RNAP II total no Ser5P	MAP2K7	uc002mit.2	chr19	7968764	7979362
RNAP II total no Ser5P	TOM1	uc003ano.2	chr22	35695796	35743985
RNAP II total no Ser5P	JMJD6	uc002jso.2	chr17	74714526	74722881
RNAP II total no Ser5P	SAP30BP	uc002jpe.2	chr17	73663398	73704138
RNAP II total no Ser5P	COX7A2	uc003phv.1	chr6	75947502	75953525
RNAP II total no Ser5P	RPL19	uc002hrq.1	chr17	37356535	37360980
RNAP II total no Ser5P	PAFAH1B1	uc002fuw.3	chr17	2496922	2588908
RNAP II total no Ser5P	XRCC6	uc003bao.1	chr22	42017294	42060052
RNAP II total no Ser5P	KIAA0664	uc002fuy.1	chr17	2592679	2614927
RNAP II total no Ser5P	NUDC	uc001bnh.1	chr1	27248223	27272887
RNAP II total no Ser5P	TM9SF3	uc010qot.1	chr10	98277867	98346809
RNAP II total no Ser5P	MTCH1	uc003one.3	chr6	36937502	36953949
RNAP II total no Ser5P	RPS19	uc002ort.2	chr19	42363987	42375482
RNAP II total no Ser5P	PER2	uc002vyc.2	chr2	239152679	239197207
RNAP II total no Ser5P	NINJ1	uc004ath.3	chr9	95883771	95896570
RNAP II total no Ser5P	AKIRIN1	uc001ccw.2	chr1	39456915	39471735
RNAP II total no Ser5P	CPSF1	uc011llf.1	chr8	145625740	145634556
RNAP II total no Ser5P	KLHL24	uc003flw.2	chr3	183353410	183402302
RNAP II total no Ser5P	LDHA	uc001mok.3	chr11	18415935	18429765
RNAP II total no Ser5P	MAPKAPK2	uc001hel.1	chr1	206858288	206907626
RNAP II total no Ser5P	HNRNPA3	uc002ulc.1	chr2	178077421	178088685
RNAP II total no Ser5P	LEMD2	uc003ofe.2	chr6	33738990	33756902
RNAP II total no Ser5P	RNF138	uc002kxg.2	chr18	29671836	29711523
RNAP II total no Ser5P	RNF38	uc003zzh.2	chr9	36336400	36400296
RNAP II total no Ser5P	CPSF6	uc001suu.3	chr12	69633316	69668137
RNAP II total no Ser5P	C9orf89	uc004ate.2	chr9	95858449	95875564
RNAP II total no Ser5P	WDR36	uc003kpd.2	chr5	110427869	110466201
RNAP II total no Ser5P	BRD4	uc002nat.3	chr19	15363805	15443342
RNAP II total no Ser5P	HNRNPA1	uc001sfo.3	chr12	54674487	54680872
RNAP II total no Ser5P	PIM3	uc003bjb.2	chr22	50354142	50357719
RNAP II total no Ser5P	S100A10	uc001ezl.2	chr1	151955386	151966714
RNAP II total no Ser5P	SETD1B	uc001ubg.2	chr12	122242085	122244011
RNAP II total no Ser5P	ZAP70	uc010yvf.1	chr2	98330030	98351919
RNAP II total no Ser5P	BCLAF1	uc011edc.1	chr6	136578000	136610989
RNAP II total no Ser5P	SPOCK2	uc001jsp.2	chr10	73818792	73848790
RNAP II total no Ser5P	ARHGDIB	uc001rcq.1	chr12	15094949	15114562
RNAP II total no Ser5P	MID1IP1	uc004dei.3	chrX	38660684	38665781
RNAP II total no Ser5P	CSK	uc010bka.2	chr15	75074424	75091391
RNAP II total no Ser5P	AlphaTFEB	uc010roh.1	chr11	65265232	65273937
RNAP II total no Ser5P	GATA3	uc001ijz.2	chr10	8096666	8117162
RNAP II total no Ser5P	PTPRC	uc001gur.1	chr1	198608136	198726545
RNAP II total no Ser5P	TRIM8	uc001kvz.2	chr10	104404251	104418076
RNAP II total no Ser5P	LRRFIP1	uc002vxe.2	chr2	238600806	238674556
RNAP II total no Ser5P	B4GALT1	uc003zsg.2	chr9	33110638	33167356
RNAP II total no Ser5P	PIM1	uc003onk.2	chr6	37137921	37143202
RNAP II total no Ser5P	ALKBH5	uc010cpx.2	chr17	18088069	18113265
RNAP II total no Ser5P	CITED2	uc003qip.1	chr6	139693396	139695785
RNAP II total no Ser5P	NAP1L4	uc001lxc.2	chr11	2965660	3013607
RNAP II total no Ser5P	LPXN	uc009ymp.2	chr11	58294345	58343390
RNAP II total no Ser5P	PRPF38B	uc001dvw.3	chr1	109234931	109244420
RNAP II total no Ser5P	TMEM123	uc001pha.2	chr11	102267057	102323775
RNAP II total no Ser5P	H3F3B	uc001hpw.2	chr1	226250420	226259702
RNAP II total no Ser5P	AX748264	uc002vvl.1	chr2	235361542	235363353
RNAP II total no Ser5P	IRF2BP2	uc009xfw.2	chr1	234740016	234743860
RNAP II total no Ser5P	SAFB2	uc002mcd.2	chr19	5587010	5622938
RNAP II total no Ser5P	SAFB	uc002mcf.2	chr19	5623163	5668488
RNAP II total no Ser5P	P2RY10	uc004ede.2	chrX	78200828	78217437
RNAP II total no Ser5P	SLC20A1	uc002tib.2	chr2	113403526	113421398
RNAP II total no Ser5P	RNF166	uc002flk.2	chr16	88762909	88772800
RNAP II total no Ser5P	BX648371	uc003yry.2	chr8	126953377	126963433
RNAP II total no Ser5P	MIDN	uc002lrp.2	chr19	1248551	1259139
RNAP II total and Ser5P	C1orf212	uc001byb.2	chr1	35319123	35325392
RNAP II total and Ser5P	ARRDC2	uc002nhu.2	chr19	18111943	18124905
RNAP II total and Ser5P	GPR132	uc001yqd.2	chr14	105515737	105531754
RNAP II total and Ser5P	FOSL2	uc002rma.2	chr2	28615778	28637514
RNAP II total and Ser5P	MAEA	uc010ibs.1	chr4	1283671	1323064
RNAP II total and Ser5P	IFNAR1	uc011adv.1	chr21	34696733	34732126
RNAP II total and Ser5P	VAV3	uc010ouw.1	chr1	108113781	108507545
RNAP II total and Ser5P	SLC2A3	uc001qtr.2	chr12	8071824	8088892
RNAP II total and Ser5P	RUFY1	uc003mka.1	chr5	178977570	179037019
RNAP II total and Ser5P	ITPKB	uc001hqh.2	chr1	226894900	226926876
RNAP II total and Ser5P	TOX2	uc002xle.3	chr20	42544781	42698252
RNAP II total and Ser5P	STMN3	uc002yfr.1	chr20	62271060	62284780
RNAP II total and Ser5P	CYTIP	uc010zcl.1	chr2	158271130	158345473
RNAP II total and Ser5P	C7orf44	uc003tio.1	chr7	43678858	43769083
RNAP II total and Ser5P	PDE4B	uc001dcn.2	chr1	66258192	66840261
RNAP II total and Ser5P	CYTH1	uc002jvw.2	chr17	76670130	76778376
RNAP II total and Ser5P	SMAP2	uc001cfj.2	chr1	40839727	40888992
RNAP II total and Ser5P	CHD2	uc002bsp.2	chr15	93443550	93571236
RNAP II total and Ser5P	FLNA	uc004fkk.2	chrX	153576899	153603006
RNAP II total and Ser5P	S1PR4	uc002lxg.2	chr19	3178765	3180329
RNAP II total and Ser5P	WDR82	uc003ddl.2	chr3	52288437	52312659
RNAP II total and Ser5P	BIRC3	uc001pgx.2	chr11	102188193	102208464
RNAP II total and Ser5P	C1orf38	uc010ofo.1	chr1	28199054	28213192
RNAP II total and Ser5P	RNF4	uc003gfc.2	chr4	2471182	2517581
RNAP II total and Ser5P	SKI	uc001aja.3	chr1	2160133	2241651
RNAP II total and Ser5P	UPP1	uc003toj.2	chr7	48128354	48148329
RNAP II total and Ser5P	ZFPM1	uc002fkv.2	chr16	88520013	88601573
RNAP II total and Ser5P	DNAJB1	uc010xnr.1	chr19	14625581	14640049
RNAP II total and Ser5P	SLC2A1	uc001cik.2	chr1	43391045	43424847
RNAP II total and Ser5P	CNOT6L	uc011ccd.1	chr4	78634541	78740522
RNAP II total and Ser5P	RHOH	uc003guz.2	chr4	40198526	40246281
RNAP II total and Ser5P	SMAD7	uc010xde.1	chr18	46446223	46475703
RNAP II total and Ser5P	FAM46C	uc001ehe.2	chr1	118148603	118171010
RNAP II total and Ser5P	RNF125	uc002kxf.1	chr18	29598444	29653154
RNAP II total and Ser5P	STK17B	uc002utk.2	chr2	196998307	197036336
RNAP II total and Ser5P	GIMAP8	uc003whj.2	chr7	150147961	150176482
RNAP II total and Ser5P	AEN	uc010bnl.2	chr15	89164526	89170572
RNAP II total and Ser5P	ZNF331	uc002qbx.1	chr19	54024176	54083523
RNAP II total and Ser5P	PDIK1L	uc001blj.3	chr1	26438267	26452024
RNAP II total and Ser5P	KRR1	uc010stx.1	chr12	75899945	75905418
RNAP II total and Ser5P	ILF3	uc002mpo.2	chr19	10764936	10803093
RNAP II total and Ser5P	DDIT4	uc001jsx.1	chr10	74033676	74035797
RNAP II total and Ser5P	ARID5A	uc002swe.2	chr2	97202463	97218370
RNAP II total and Ser5P	C1orf63	uc001bjw.2	chr1	25568740	25573985
RNAP II total and Ser5P	RPLP1	uc002asd.1	chr15	69745158	69747884
RNAP II total and Ser5P	LOH12CR1	uc001ral.2	chr12	12510019	12619838
RNAP II total and Ser5P	ELL	uc010ebq.2	chr19	18553474	18632937
RNAP II total and Ser5P	PLEKHB2	uc002tsg.3	chr2	131862419	131907424
RNAP II total and Ser5P	HSPH1	uc001utj.2	chr13	31710764	31736117
RNAP II total and Ser5P	EIF4G2	uc001mjb.2	chr11	10818593	10829520
RNAP II total and Ser5P	RPN1	uc003ekr.1	chr3	128338812	128369719
RNAP II total and Ser5P	HSPE1	uc002uul.2	chr2	198364720	198368186
RNAP II total and Ser5P	TMSB10	uc002sow.1	chr2	85132762	85133799
RNAP II total and Ser5P	EIF5	uc001ymq.2	chr14	103800492	103811359
RNAP II total and Ser5P	N4BP1	uc002efp.2	chr16	48572638	48644120
RNAP II total and Ser5P	MRFAP1	uc003gjg.1	chr4	6641817	6644449
RNAP II total and Ser5P	CR618431	uc003vql.1	chr7	130538478	130613408
RNAP II total and Ser5P	EWSR1	uc003aev.2	chr22	29663997	29696514
RNAP II total and Ser5P	MOBKL2A	uc002luv.2	chr19	2071036	2096269
RNAP II total and Ser5P	PASK	uc002waq.2	chr2	242053051	242088878
RNAP II total and Ser5P	GSPT1	uc002dbu.2	chr16	11961986	12009825
RNAP II total and Ser5P	NFKBIZ	uc003dvo.2	chr3	101546856	101579865
RNAP II total and Ser5P	HCG27	uc011dni.1	chr6	31165536	31171744
RNAP II total and Ser5P	NFKBIA	uc001wtf.3	chr14	35870716	35873960
RNAP II total and Ser5P	RNPEPL1	uc002vzi.2	chr2	241508103	241518141
RNAP II total and Ser5P	TMEM134	uc010rpt.1	chr11	67234121	67236731
RNAP II total and Ser5P	CCR7	uc002huw.2	chr17	38710022	38721724
RNAP II total and Ser5P	SNX9	uc003qqv.1	chr6	158244293	158366109
RNAP II total and Ser5P	S1PR1	uc001dud.2	chr1	101702304	101707076
RNAP II total and Ser5P	YPEL5	uc002rna.3	chr2	30369749	30383398
RNAP II total and Ser5P	CD3E	uc001psq.3	chr11	118175294	118186889
RNAP II total and Ser5P	LEPROTL1	uc003xhw.3	chr8	29952921	29965586
RNAP II total and Ser5P	SRGN	uc001joz.2	chr10	70847827	70864565
RNAP II total and Ser5P	PTGER4	uc003jlz.2	chr5	40680031	40693835
RNAP II total and Ser5P	KLF2	uc002ndw.2	chr19	16435650	16438337
RNAP II total and Ser5P	CLK1	uc010zhi.1	chr2	201717731	201729284
RNAP II total and Ser5P	PIK3CD	uc001aqa.2	chr1	9711789	9775827
RNAP II total and Ser5P	TNFAIP3	uc003qhr.2	chr6	138188580	138204445
RNAP II total and Ser5P	FAM78A	uc004caj.2	chr9	134133465	134145880
RNAP II total and Ser5P	YWHAZ	uc011lhe.1	chr8	101930803	101962799
RNAP II total and Ser5P	PCF11	uc001ozy.2	chr11	82868230	82869913
RNAP II total and Ser5P	DM119428	uc002ixv.2	chr17	57916226	57918708
RNAP II total and Ser5P	AHNAK	uc001ntl.2	chr11	62283374	62314332
RNAP II total and Ser5P	PIK3IP1	uc003ako.2	chr22	31685023	31688520
RNAP II total and Ser5P	C13orf15	uc001uyi.2	chr13	42031541	42045013
RNAP II total and Ser5P	IER2	uc002mwr.2	chr19	13261281	13265716
RNAP II total and Ser5P	VIM	uc001iou.2	chr10	17270257	17279592
RNAP II total and Ser5P	ZC3H12A	uc001cbb.3	chr1	37940118	37949976
RNAP II total and Ser5P	CD3D	uc001pss.1	chr11	118209788	118213459
RNAP II total and Ser5P	IL4R	uc002don.2	chr16	27325250	27376098
RNAP II total and Ser5P	IL10RA	uc010rxl.1	chr11	117857105	117872196
RNAP II total and Ser5P	CALM1	uc010atq.1	chr14	90863372	90874610
RNAP II total and Ser5P	MCL1	uc010pch.1	chr1	150547036	150552086
RNAP II total and Ser5P	HIST1H2BD	uc003ngs.2	chr6	26158348	26171574
RNAP II total and Ser5P	TPP2	uc001vpi.3	chr13	103249285	103331521
RNAP II total and Ser5P	TMSB4X	uc004cvf.2	chrX	12993224	12995345
RNAP II total and Ser5P	PTMA	uc002vsb.3	chr2	232573234	232578248
RNAP II total and Ser5P	SOCS3	uc002jvl.2	chr17	76352858	76356158
RNAP II total and Ser5P	LOC100216545	uc003vck.2	chr7	104650988	104654588
RNAP II total and Ser5P	TLE3	uc010ukd.1	chr15	70340542	70389061
RNAP II total and Ser5P	JUND	uc002nip.2	chr19	18390562	18392432
no Peak	AASDH	uc003hbn.2	chr4	57204458	57253638
no Peak	AATF	uc002hni.2	chr17	35306174	35414170
no Peak	ABCB7	uc004ebz.2	chrX	74273106	74376132
no Peak	ABCC11	uc010vgl.1	chr16	48250024	48281479
no Peak	ABCD3	uc010oto.1	chr1	94883932	94984218
no Peak	ABHD2	uc002bnj.2	chr15	89631380	89745591
no Peak	ACAA2	uc002ldx.3	chr18	47309874	47340283
no Peak	ACBD3	uc001hpy.2	chr1	226332381	226374423
no Peak	ACBD6	uc001gog.2	chr1	180257352	180472022
no Peak	ACN9	uc003uoo.3	chr7	96745904	96811073
no Peak	ACOX3	uc003glc.3	chr4	8368009	8442452
no Peak	ACP6	uc001epr.2	chr1	147119167	147142634
no Peak	ACPL2	uc003etu.2	chr3	140950681	141013485
no Peak	ACSL4	uc004eoi.2	chrX	108884563	108976621
no Peak	ACSS1	uc002wub.2	chr20	24986873	25039616
no Peak	ACTN1	uc001xkm.2	chr14	69340840	69446083
no Peak	ACTN4	uc010egc.1	chr19	39138326	39212518
no Peak	ACVR1B	uc010snn.1	chr12	52345485	52390859
no Peak	ACVR1C	uc002tzk.3	chr2	158383279	158485399
no Peak	ACVR1	uc010fog.2	chr2	158592957	158732374
no Peak	ADAM10	uc002afd.1	chr15	58888509	59042177
no Peak	ADAM17	uc010exb.1	chr2	9666274	9695917
no Peak	ADAM19	uc003lwz.2	chr5	156904312	157002768
no Peak	ADSS	uc009xgr.1	chr1	244586136	244615413
no Peak	AEBP2	uc001ref.2	chr12	19592607	19675173
no Peak	AFF1	uc011ccz.1	chr4	87856162	88062190
no Peak	AFF3	uc002tag.2	chr2	100163717	100759037
no Peak	AFF4	uc003kye.1	chr5	132227508	132299354
no Peak	AFTPH	uc002scz.2	chr2	64751464	64820131
no Peak	AGFG2	uc003uvg.1	chr7	100136833	100153990
no Peak	AGPS	uc002ull.2	chr2	178257470	178408564
no Peak	AHCYL1	uc001dyx.2	chr1	110527307	110566363
no Peak	AHNAK	uc001ntk.1	chr11	62201015	62314332
no Peak	AIFM1	uc011mus.1	chrX	129263339	129299808
no Peak	AK026502	uc003adf.1	chr22	27068848	27114949
no Peak	AK056689	uc001vji.1	chr13	74805593	74832291
no Peak	AK057104	uc003oci.1	chr6	32862499	32871535
no Peak	AK091275	uc001pxw.1	chr11	121318039	121323722
no Peak	AK093892	uc001xmh.1	chr14	71075514	71108015
no Peak	AK096668	uc003jod.1	chr5	43577743	43603165
no Peak	AK097891	uc010bxu.1	chr16	25043064	25044093
no Peak	AK098263	uc004aan.1	chr9	37789212	37800732
no Peak	AK123100	uc002goe.1	chr17	13932608	13972775
no Peak	AK124295	uc003xdb.1	chr8	23082733	23088439
no Peak	AK125001	uc002uns.1	chr2	181988563	182264280
no Peak	AK125646	uc003tgp.1	chr7	38381215	38418238
no Peak	AK125884	uc001ezm.1	chr1	151967006	152015250
no Peak	AK307246	uc009wog.1	chr1	153518229	153524245
no Peak	AK311398	uc010ivk.2	chr5	43067682	43093658
no Peak	AKAP10	uc002gwp.1	chr17	19812486	19881129
no Peak	AKAP11	uc001uys.1	chr13	42846288	42897402
no Peak	AKAP13	uc002bls.2	chr15	85923870	86080222
no Peak	AKAP1	uc002iux.2	chr17	55162552	55198709
no Peak	AKAP7	uc003qck.2	chr6	131456870	131604673
no Peak	AKIRIN2	uc003pmk.2	chr6	88384578	88411985
no Peak	AKR1B1	uc003vrp.1	chr7	134127106	134143888
no Peak	AL833583	uc003wda.2	chr7	143104905	143220538
no Peak	ALAS1	uc003dcy.1	chr3	52232115	52248343
no Peak	ALG2	uc004azg.2	chr9	101978707	101984246
no Peak	ALG5	uc010ter.1	chr13	37523909	37573504
no Peak	ALKBH1	uc001xuc.1	chr14	78138748	78174356
no Peak	ALMS1	uc002sje.1	chr2	73612885	73837046
no Peak	ALOX5AP	uc010tdr.1	chr13	31287614	31338556
no Peak	AMD1	uc011eay.1	chr6	111135823	111216913
no Peak	AMICA1	uc001psk.2	chr11	118064441	118095809
no Peak	AMMECR1L	uc002tpm.2	chr2	128619208	128643514
no Peak	AMMECR1	uc004eoq.2	chrX	109437414	109683458
no Peak	ANAPC10	uc003ijw.3	chr4	145916313	146019368
no Peak	ANAPC1	uc002thi.2	chr2	112526640	112641741
no Peak	ANAPC2	uc004clr.1	chr9	140069235	140083057
no Peak	ANAPC7	uc001tqp.3	chr12	110813273	110841535
no Peak	ANK3	uc001jkz.3	chr10	61788159	62493155
no Peak	ANKIB1	uc003ulw.2	chr7	91875547	92030698
no Peak	ANKLE2	uc001ukx.2	chr12	133302253	133338451
no Peak	ANKMY1	uc002vzd.1	chr2	241418838	241500275
no Peak	ANKRA2	uc003kcv.2	chr5	72853284	72861498
no Peak	ANKRD13C	uc001dey.3	chr1	70818494	70820399
no Peak	ANKRD19	uc004asr.3	chr9	95571892	95650973
no Peak	ANKRD27	uc002ntn.1	chr19	33087906	33166102
no Peak	ANKRD28	uc003caj.1	chr3	15708743	15901053
no Peak	ANKRD32	uc003kkr.3	chr5	93954390	94031571
no Peak	ANKRD39	uc002sxd.3	chr2	97513730	97523756
no Peak	ANKRD42	uc001pab.1	chr11	82905290	82967042
no Peak	ANKRD44	uc002uua.1	chr2	197859249	198062762
no Peak	ANKRD46	uc003yjm.2	chr8	101521986	101572012
no Peak	ANKRD55	uc003jqu.2	chr5	55395507	55529186
no Peak	ANLN	uc003tff.2	chr7	36429431	36493398
no Peak	ANO6	uc010sld.1	chr12	45609769	45834187
no Peak	ANP32A	uc002arl.2	chr15	69070876	69113261
no Peak	ANP32B	uc004aya.2	chr9	100745488	100778222
no Peak	ANTXR2	uc003hly.3	chr4	80822772	80994477
no Peak	ANXA2	uc002agn.2	chr15	60639350	60690185
no Peak	ANXA7	uc001jtz.2	chr10	75135188	75173841
no Peak	AOAH	uc010kxf.2	chr7	36552609	36764153
no Peak	AP1AR	uc003iaj.3	chr4	113152894	113191209
no Peak	AP1G1	uc010vmh.1	chr16	71800341	71842976
no Peak	AP2B1	uc002hjq.2	chr17	33914281	34053433
no Peak	AP3B1	uc003kfj.2	chr5	77298150	77590528
no Peak	AP3S1	uc003krk.2	chr5	115177618	115249776
no Peak	AP4E1	uc001zyx.1	chr15	51200945	51298097
no Peak	APBB1IP	uc001iss.2	chr10	26727265	26856730
no Peak	APC	uc010jby.2	chr5	112043217	112181935
no Peak	APIP	uc010reo.1	chr11	34896713	34937939
no Peak	APOBEC3G	uc003awx.2	chr22	39473024	39483747
no Peak	APOL3	uc003aou.2	chr22	36536371	36562225
no Peak	APOL6	uc003aoe.2	chr22	36044423	36064455
no Peak	APPBP2	uc002iys.1	chr17	58520519	58603580
no Peak	APP	uc011aci.1	chr21	27252861	27543446
no Peak	AQR	uc001ziv.2	chr15	35148552	35261995
no Peak	ARAP2	uc003gsr.1	chr4	36161733	36245484
no Peak	ARC20	uc003btc.1	chr3	9834226	9896822
no Peak	ARFGAP3	uc011apu.1	chr22	43213147	43253408
no Peak	ARHGAP12	uc001ivz.1	chr10	32095224	32217770
no Peak	ARHGAP15	uc002tvm.3	chr2	143886898	144525920
no Peak	ARHGAP1	uc009yle.1	chr11	46708371	46722120
no Peak	ARHGAP25	uc002sev.2	chr2	69001932	69046873
no Peak	ARHGAP26	uc011dbj.1	chr5	142150291	142608571
no Peak	ARHGAP27	uc002iix.2	chr17	43471268	43503012
no Peak	ARHGAP5	uc001wrl.2	chr14	32546188	32628932
no Peak	ARHGEF2	uc010pgu.1	chr1	155931451	155959290
no Peak	ARHGEF6	uc004fab.2	chrX	135747713	135863503
no Peak	ARID1B	uc003qqn.2	chr6	157099085	157530401
no Peak	ARID3B	uc002ayc.2	chr15	74833547	74867339
no Peak	ARID4A	uc001xdo.2	chr14	58765221	58840448
no Peak	ARID4B	uc001hwq.2	chr1	235330210	235491532
no Peak	ARID5B	uc001jlt.1	chr10	63661442	63856703
no Peak	ARL15	uc003jpg.1	chr5	53180613	53606403
no Peak	ARL16	uc002kbf.2	chr17	79648233	79650954
no Peak	ARL1	uc001tib.2	chr12	101786922	101801572
no Peak	ARL3	uc001kwa.2	chr10	104433489	104474190
no Peak	ARL5	uc010zcc.1	chr2	152645592	152685009
no Peak	ARPC1B	uc011kit.1	chr7	98923509	98985884
no Peak	ARPC5	uc001gql.2	chr1	183595332	183604985
no Peak	ASB7	uc002bwk.2	chr15	101142754	101191902
no Peak	ASCC1	uc010qju.1	chr10	73856277	73976892
no Peak	ASCC3	uc003pqk.2	chr6	100956608	101329224
no Peak	ASFMR1	uc010nsq.2	chrX	146990948	147003676
no Peak	ASH1L	uc009wqr.1	chr1	155447676	155532585
no Peak	ASXL2	uc002rgs.2	chr2	25962252	26101312
no Peak	ATAD1	uc001kez.1	chr10	89512874	89577917
no Peak	ATAD3B	uc001afv.2	chr1	1407163	1431581
no Peak	ATF5	uc010enq.1	chr19	50431973	50437192
no Peak	ATF7IP	uc001rbw.2	chr12	14518610	14651696
no Peak	ATG2B	uc001yfi.2	chr14	96747595	96829678
no Peak	ATG4C	uc001dat.2	chr1	63249802	63330049
no Peak	ATMIN	uc002ffz.1	chr16	81069457	81080951
no Peak	ATP10A	uc010ayu.2	chr15	25923861	26108349
no Peak	ATP2B4	uc001gzv.2	chr1	203595927	203713207
no Peak	ATP2C1	uc011blg.1	chr3	130569444	130721992
no Peak	ATP5A1	uc002lbt.1	chr18	43664109	43684199
no Peak	ATP5C1	uc001iju.2	chr10	7830092	7849755
no Peak	ATP5F1	uc009wgf.1	chr1	111991461	112002258
no Peak	ATP5G3	uc002uka.3	chr2	176040986	176046490
no Peak	ATP5J	uc002yls.2	chr21	27096791	27107965
no Peak	ATP6V1A	uc011bik.1	chr3	113465907	113530901
no Peak	ATP6V1H	uc003xrm.2	chr8	54628115	54755850
no Peak	ATP7A	uc004ecx.3	chrX	77166193	77305891
no Peak	ATP9B	uc002lmv.1	chr18	76829396	77089302
no Peak	ATRN	uc002wim.2	chr20	3451664	3631769
no Peak	ATRX	uc004ecr.2	chrX	76909587	77041719
no Peak	ATXN1	uc003nbt.2	chr6	16299343	16761721
no Peak	ATXN2	uc001tsm.1	chr12	111950276	112036294
no Peak	ATXN3	uc001yac.3	chr14	92524896	92572965
no Peak	ATXN7L1	uc003vde.2	chr7	105245220	105517031
no Peak	AUH	uc004arf.3	chr9	93976098	94124206
no Peak	B3GNT2	uc002sbs.2	chr2	62423261	62451864
no Peak	BAG4	uc003xky.1	chr8	38034105	38068537
no Peak	BANP	uc002fkp.2	chr16	87985037	88110923
no Peak	BARD1	uc002veu.2	chr2	215593274	215674428
no Peak	BAT2L	uc004cam.1	chr9	134269599	134322593
no Peak	BAT3	uc003nvj.1	chr6	31612085	31620455
no Peak	BAT5	uc011dnz.1	chr6	31654735	31681842
no Peak	BAZ1A	uc001wsk.2	chr14	35221938	35344853
no Peak	BAZ2B	uc002uao.2	chr2	160175491	160473112
no Peak	BBS2	uc010ccg.2	chr16	56532348	56554008
no Peak	BC009800	uc003hzj.3	chr4	110351122	110354973
no Peak	BC019904	uc001lwe.2	chr11	2349979	2399222
no Peak	BC024732	uc002nry.1	chr19	28284401	28297182
no Peak	BC033837	uc003biq.2	chr22	49808175	50051190
no Peak	BC036617	uc002sqr.2	chr2	86116402	86119368
no Peak	BC036698	uc003brm.2	chr3	9391373	9438338
no Peak	BC037783	uc003ugj.1	chr7	77287972	77326662
no Peak	BC038201	uc001eze.2	chr1	151763317	151766877
no Peak	BC038465	uc001yfu.2	chr14	97925206	97930495
no Peak	BC040914	uc003imp.1	chr4	153021969	153025789
no Peak	BC044741	uc001tca.2	chr12	92539860	92561335
no Peak	BC044934	uc002bjk.1	chr15	83626881	83654620
no Peak	BC047952	uc003pqc.2	chr6	99973939	100033082
no Peak	BC061919	uc003vci.2	chr7	104581652	104602779
no Peak	BC067907	uc004dwe.2	chrX	64808260	64845757
no Peak	BC078172	uc001iot.1	chr10	17257194	17271983
no Peak	BCAP31	uc004fie.2	chrX	152965946	152990201
no Peak	BCAS4	uc002xvq.2	chr20	49411466	49493713
no Peak	BCL2A1	uc002bfd.3	chr15	80253232	80263643
no Peak	BCL2L1	uc002wwl.2	chr20	30252262	30310656
no Peak	BCL7B	uc003tyf.1	chr7	72950685	72972024
no Peak	BCL7C	uc002dzt.1	chr16	30845372	30905399
no Peak	BCMSUN	uc001vdo.1	chr13	50556687	50699677
no Peak	BCYRN1	uc011mpt.1	chrX	70430034	70948962
no Peak	BDH1	uc003fxu.2	chr3	197236654	197300194
no Peak	BDNF	uc001mrq.3	chr11	27528398	27719773
no Peak	BICD2	uc004aso.1	chr9	95473644	95527083
no Peak	BIN2	uc010sng.1	chr12	51674822	51718452
no Peak	BIRC6	uc010ezu.2	chr2	32582095	32843963
no Peak	BLM	uc010uqh.1	chr15	91260578	91358684
no Peak	BLOC1S2	uc001kqw.1	chr10	102033712	102046439
no Peak	BMPR1A	uc001kdy.2	chr10	88516395	88684944
no Peak	BOD1L	uc010ids.1	chr4	13612557	13629328
no Peak	BPTF	uc002jge.2	chr17	65821779	65980493
no Peak	BRAF	uc003vwc.3	chr7	140433814	140624564
no Peak	BRAP	uc001tsn.3	chr12	112079950	112123790
no Peak	BRD3	uc004cex.2	chr9	136901153	136933655
no Peak	BRE	uc002rlq.2	chr2	28113481	28561765
no Peak	BRF1	uc010tyo.1	chr14	105675622	105781914
no Peak	BRP44	uc001geu.2	chr1	167887310	167906303
no Peak	BTAF1	uc001khr.2	chr10	93683735	93790078
no Peak	BTBD11	uc001tmk.1	chr12	107712196	108053419
no Peak	BTBD7	uc001ybo.2	chr14	93703897	93799385
no Peak	BTLA	uc003dza.3	chr3	112182814	112218408
no Peak	BTN3A1	uc011dkj.1	chr6	26402464	26415442
no Peak	BTN3A2	uc003nhp.2	chr6	26365397	26378546
no Peak	BUB1	uc002tgc.2	chr2	111395410	111435684
no Peak	BUB3	uc001lhd.2	chr10	124913759	124924886
no Peak	BUD13	uc001ppo.2	chr11	116618887	116643714
no Peak	BX647114	uc003pvb.2	chr6	111804713	111824813
no Peak	BZW1	uc002uwc.2	chr2	201676646	201688559
no Peak	BZW2	uc011jxx.1	chr7	16685758	16737811
no Peak	C10orf118	uc001lbc.1	chr10	115881973	115934364
no Peak	C10orf12	uc009xvg.1	chr10	98592038	98742626
no Peak	C10orf46	uc010qst.1	chr10	120433633	120514758
no Peak	C11orf48	uc001nuf.2	chr11	62430289	62439241
no Peak	C11orf61	uc001qaz.1	chr11	124636393	124670299
no Peak	C12orf11	uc001rhk.3	chr12	27058114	27091254
no Peak	C12orf26	uc001szq.2	chr12	82752323	82872941
no Peak	C12orf42	uc001tjs.2	chr12	103631369	103889746
no Peak	C12orf49	uc001tvz.1	chr12	117153595	117175843
no Peak	C12orf60	uc001rcj.3	chr12	14956505	14976789
no Peak	C12orf62	uc001rwb.1	chr12	50505899	50514234
no Peak	C12orf75	uc001tlh.3	chr12	105724413	105765295
no Peak	C13orf23	uc001uwy.2	chr13	39584002	39612252
no Peak	C14orf101	uc001xcj.2	chr14	57046337	57116230
no Peak	C14orf106	uc001wwf.2	chr14	45672393	45722605
no Peak	C14orf129	uc001yfj.3	chr14	96829862	96853561
no Peak	C14orf133	uc001xtv.1	chr14	77893017	77923944
no Peak	C14orf182	uc001wxi.1	chr14	50448429	50474238
no Peak	C14orf33	uc001xbz.2	chr14	56024689	56046810
no Peak	C14orf37	uc010tro.1	chr14	58470808	58764850
no Peak	C14orf64	uc001yfw.2	chr14	98391946	98444461
no Peak	C14orf83	uc001xjj.1	chr14	67920796	67982202
no Peak	C15orf24	uc001zhm.2	chr15	34376225	34394053
no Peak	C15orf29	uc001zhp.2	chr15	34432875	34502297
no Peak	C16orf87	uc002eek.1	chr16	46835958	46865074
no Peak	C17orf39	uc002gsg.1	chr17	17942610	17971718
no Peak	C17orf56	uc002jzu.1	chr17	79202078	79212855
no Peak	C17orf97	uc010vpz.1	chr17	263233	273516
no Peak	C18orf19	uc010dlh.2	chr18	13663349	13726591
no Peak	C18orf1	uc002ksa.2	chr18	13218785	13652753
no Peak	C18orf25	uc002lbw.2	chr18	43753987	43846954
no Peak	C18orf55	uc010dqr.1	chr18	71815745	71826204
no Peak	C19orf20	uc002lou.2	chr19	507496	519653
no Peak	C19orf2	uc002nsr.2	chr19	30433424	30506611
no Peak	C1D	uc010fdc.2	chr2	68269332	68290159
no Peak	C1orf105	uc001gik.2	chr1	172389829	172437965
no Peak	C1orf107	uc001hhr.1	chr1	210001332	210030908
no Peak	C1orf109	uc001cbp.2	chr1	38147249	38156192
no Peak	C1orf162	uc001ebe.2	chr1	112016603	112021133
no Peak	C1orf182	uc001foo.2	chr1	156307104	156316783
no Peak	C1orf25	uc010pon.1	chr1	185087218	185126154
no Peak	C1orf31	uc001hwb.2	chr1	234509274	234519790
no Peak	C1orf50	uc001cia.3	chr1	43232915	43241414
no Peak	C1orf55	uc001hpu.3	chr1	226170403	226187066
no Peak	C1orf57	uc001hvj.1	chr1	233086369	233114219
no Peak	C1orf62	uc010ovb.1	chr1	109365461	109506111
no Peak	C1orf69	uc001hsl.3	chr1	228353428	228369957
no Peak	C1orf71	uc001ibp.2	chr1	246729638	246831883
no Peak	C1orf83	uc001cwu.1	chr1	54519273	54578192
no Peak	C1S	uc001qsj.2	chr12	7096259	7178333
no Peak	C20orf112	uc002wxw.1	chr20	31052583	31124200
no Peak	C20orf196	uc002wmf.2	chr20	5731042	5844556
no Peak	C20orf43	uc002xxs.2	chr20	55043646	55046003
no Peak	C20orf4	uc002xfd.1	chr20	34824380	34858840
no Peak	C20orf72	uc002wqh.2	chr20	17949761	17971759
no Peak	C20orf94	uc010zre.1	chr20	10415950	10604025
no Peak	C21orf70	uc002zgl.2	chr21	46359954	46396887
no Peak	C22orf13	uc003aal.2	chr22	24936405	24951903
no Peak	C22orf26	uc003bgq.1	chr22	46446338	46450024
no Peak	C2CD3	uc001ouv.2	chr11	73824245	73882064
no Peak	C2orf34	uc002rum.2	chr2	44589042	44999729
no Peak	C2orf42	uc002sgh.2	chr2	70377018	70418151
no Peak	C2orf43	uc002rea.1	chr2	20883802	21022827
no Peak	C3orf10	uc003bvb.2	chr3	10157332	10168873
no Peak	C3orf21	uc003fum.3	chr3	194789014	194991895
no Peak	C3orf38	uc003dqw.2	chr3	88198892	88207113
no Peak	C3orf39	uc003cmr.1	chr3	43120728	43147565
no Peak	C3orf58	uc003evo.2	chr3	143690639	143711209
no Peak	C4orf14	uc003hck.2	chr4	57829516	57843826
no Peak	C4orf29	uc003ifs.2	chr4	128886460	128957474
no Peak	C4orf41	uc003ivw.2	chr4	184580445	184634744
no Peak	C5orf24	uc003kzx.2	chr5	134181369	134195424
no Peak	C5orf37	uc003keh.3	chr5	74970032	75013313
no Peak	C5orf41	uc003mcg.2	chr5	172483369	172519331
no Peak	C5orf62	uc003lsw.2	chr5	150157866	150176297
no Peak	C6orf106	uc003ojr.2	chr6	34555065	34664625
no Peak	C6orf115	uc003qil.2	chr6	139349818	139364439
no Peak	C6orf150	uc003pgx.1	chr6	74134855	74162043
no Peak	C6orf153	uc003otp.1	chr6	42989384	42997337
no Peak	C6orf203	uc011eaj.1	chr6	107349406	107372544
no Peak	C6orf204	uc003pxz.1	chr6	118786238	118973020
no Peak	C6orf214	uc003nrp.1	chr6	30780642	30798436
no Peak	C6orf72	uc010kie.1	chr6	149887527	149902317
no Peak	C6orf89	uc003omv.2	chr6	36839645	36896738
no Peak	C7orf11	uc003thl.3	chr7	40172342	40174258
no Peak	C7orf25	uc010kxr.2	chr7	42948873	42971805
no Peak	C7orf27	uc003smi.2	chr7	2577510	2595146
no Peak	C7orf38	uc003urb.2	chr7	99143923	99156115
no Peak	C7orf60	uc011kms.1	chr7	112459201	112579932
no Peak	C7orf70	uc003spu.2	chr7	6369040	6388590
no Peak	C8orf38	uc003yhf.2	chr8	95908039	96070937
no Peak	C8orf76	uc003yqc.1	chr8	124232230	124253617
no Peak	C9orf40	uc004ajo.3	chr9	77561499	77567802
no Peak	C9orf46	uc003zjd.2	chr9	5357972	5630071
no Peak	C9orf64	uc004anc.2	chr9	86553228	86571901
no Peak	C9orf72	uc003zqr.1	chr9	27560498	27573842
no Peak	C9orf80	uc004bgg.2	chr9	115448792	115480387
no Peak	C9orf85	uc010mov.2	chr9	74526422	74599390
no Peak	C9orf91	uc004bjd.3	chr9	117373705	117408696
no Peak	C9orf95	uc004ajs.3	chr9	77676117	77703133
no Peak	CA6	uc001apm.2	chr1	9005921	9035146
no Peak	CAB39	uc002vqx.2	chr2	231577556	231685789
no Peak	CABC1	uc010pvp.1	chr1	227127937	227153111
no Peak	CACNA1I	uc003ayc.2	chr22	39966757	40085738
no Peak	CALCOCO2	uc010wlp.1	chr17	46908371	46942228
no Peak	CALHM2	uc001kxd.1	chr10	105208870	105212658
no Peak	CAMK2D	uc003ibo.3	chr4	114372189	114683083
no Peak	CAMK2G	uc001jvv.1	chr10	75576236	75634343
no Peak	CAMK4	uc011cvj.1	chr5	110559647	110820746
no Peak	CAMLG	uc003kzt.2	chr5	134074205	134087841
no Peak	CAMSAP1	uc004cgr.3	chr9	138700333	138799005
no Peak	CANX	uc010jlb.1	chr5	179125929	179147561
no Peak	CAPRIN1	uc001mvg.2	chr11	34073229	34120605
no Peak	CAPRIN2	uc001rji.1	chr12	30862485	30907448
no Peak	CAPSL	uc003jju.1	chr5	35904397	35938881
no Peak	CAPZA2	uc003vik.1	chr7	116451123	116538889
no Peak	CARS	uc001lxe.2	chr11	3022159	3078671
no Peak	CASC3	uc010cwt.1	chr17	38296506	38327133
no Peak	CASC4	uc001ztp.2	chr15	44580928	44707958
no Peak	CASD1	uc003uni.3	chr7	94139169	94186326
no Peak	CASK	uc004dfl.3	chrX	41374190	41782287
no Peak	CASP1	uc010rve.1	chr11	104896245	104972158
no Peak	CASP2	uc003wco.2	chr7	142985401	143004784
no Peak	CASP3	uc003iwh.2	chr4	185548851	185570629
no Peak	CASP8AP2	uc003pnr.2	chr6	90539618	90584154
no Peak	CASP8	uc002uxo.1	chr2	202098165	202146638
no Peak	CASS4	uc002xxq.3	chr20	54987313	55028930
no Peak	CAT	uc001mvm.2	chr11	34460477	34493603
no Peak	CBARA1	uc001jtb.1	chr10	74127097	74385899
no Peak	CBX1	uc002ine.3	chr17	46147414	46178883
no Peak	CBX3	uc003sxt.2	chr7	26241098	26252974
no Peak	CBX5	uc001sfk.3	chr12	54624731	54673915
no Peak	CCBL1	uc011mbl.1	chr9	131595392	131644354
no Peak	CCDC109B	uc010imf.2	chr4	110481354	110604350
no Peak	CCDC127	uc003jam.1	chr5	204874	218297
no Peak	CCDC12	uc003cqo.2	chr3	46963219	47018270
no Peak	CCDC137	uc002kbd.2	chr17	79633760	79640934
no Peak	CCDC50	uc003fsv.2	chr3	191046873	191116458
no Peak	CCDC55	uc002hev.2	chr17	28443833	28513485
no Peak	CCDC6	uc001jks.3	chr10	61548521	61666818
no Peak	CCDC91	uc001rio.2	chr12	28332209	28703098
no Peak	CCDC93	uc010fld.1	chr2	118693993	118771697
no Peak	CCHCR1	uc003nsr.3	chr6	31110216	31126015
no Peak	CCNT2	uc010zbf.1	chr2	135676392	135714584
no Peak	CCNY	uc001iyu.3	chr10	35535952	35860845
no Peak	CCPG1	uc002acz.1	chr15	55651736	55700242
no Peak	CCS	uc001oir.2	chr11	66360689	66373489
no Peak	CCT5	uc003jeq.2	chr5	10250281	10266500
no Peak	CD2AP	uc003oyw.2	chr6	47445524	47594994
no Peak	CD38	uc003gol.1	chr4	15779930	15850706
no Peak	CD47	uc003dwt.1	chr3	107761940	107809935
no Peak	CD48	uc001fwn.2	chr1	160648537	160681585
no Peak	CD58	uc001egm.2	chr1	117057156	117113715
no Peak	CD82	uc001myc.2	chr11	44587140	44641313
no Peak	CD84	uc001fwg.3	chr1	160515792	160549251
no Peak	CDC123	uc009xja.2	chr10	12237960	12258491
no Peak	CDC14A	uc010oui.1	chr1	100810583	100965021
no Peak	CDC16	uc001vuk.1	chr13	115000361	115038150
no Peak	CDC23	uc003lcm.1	chr5	137541562	137549032
no Peak	CDC27	uc010wkq.1	chr17	45199809	45266665
no Peak	CDC2L6	uc003pui.1	chr6	110931180	111136837
no Peak	CDC2	uc001jld.2	chr10	62538219	62554604
no Peak	CDC73	uc001gtb.2	chr1	193091087	193223940
no Peak	CDC7	uc001doe.2	chr1	91966403	91991320
no Peak	CDCA4	uc001yqa.2	chr14	105475909	105487425
no Peak	CDK5RAP1	uc010gek.2	chr20	31946646	31989337
no Peak	CDK8	uc001uqr.1	chr13	26828755	26978569
no Peak	CDKAL1	uc003nde.1	chr6	20534687	21232632
no Peak	CDNF	uc001inc.1	chr10	14861250	14880574
no Peak	CDYL2	uc002ffs.2	chr16	80637677	80838175
no Peak	CDYL	uc003mwi.2	chr6	4706392	4955777
no Peak	CECR1	uc011agi.1	chr22	17660191	17702738
no Peak	CECR5	uc002zmh.2	chr22	17618410	17646177
no Peak	CENPA	uc002rht.2	chr2	27008881	27023932
no Peak	CENPF	uc001hkm.2	chr1	214776531	214837912
no Peak	CENPL	uc001gjg.3	chr1	173768689	173794026
no Peak	CEP110	uc004bla.1	chr9	123884078	123920158
no Peak	CEP120	uc011cwq.1	chr5	122680579	122759252
no Peak	CEP250	uc002xcm.2	chr20	34043149	34099802
no Peak	CEP350	uc001gnt.2	chr1	179923907	180084014
no Peak	CEP63	uc003eqm.2	chr3	134204574	134293852
no Peak	CFDP1	uc002fdz.2	chr16	75327608	75467387
no Peak	CFLAR	uc002uxb.3	chr2	201980815	202029001
no Peak	CGGBP1	uc003dqu.2	chr3	88101105	88199035
no Peak	CHCHD3	uc010lmi.2	chr7	132469623	132766828
no Peak	CHD2	uc002bso.1	chr15	93443550	93565392
no Peak	CHI3L2	uc001eam.2	chr1	111770280	111786060
no Peak	CHMP4B	uc002xaa.2	chr20	32399118	32442169
no Peak	CHM	uc004eet.2	chrX	85116185	85302566
no Peak	CHRM3	uc001hyp.2	chr1	239792372	240072715
no Peak	CHST7	uc004dgt.2	chrX	46433191	46457837
no Peak	CIAPIN1	uc002ell.1	chr16	57462086	57481369
no Peak	CIRH1A	uc002ews.3	chr16	69166498	69202936
no Peak	CKAP2	uc001vgu.2	chr13	53029494	53050763
no Peak	CKAP5	uc001ndi.1	chr11	46765083	46867843
no Peak	CLDND1	uc003dso.2	chr3	98225320	98240281
no Peak	CLEC16A	uc002dao.2	chr16	11038344	11276044
no Peak	CLIP1	uc001uch.1	chr12	122755980	122907116
no Peak	CLK4	uc011dgh.1	chr5	178030844	178054054
no Peak	CLNS1A	uc001oyk.2	chr11	77327196	77348851
no Peak	CLP1	uc001nkw.2	chr11	57425215	57429336
no Peak	CLR	uc001qwd.1	chr12	9786014	9811008
no Peak	CLTA	uc003zzf.1	chr9	36190891	36304778
no Peak	CMIP	uc002fgp.2	chr16	81478774	81745365
no Peak	CMPK1	uc001cri.2	chr1	47799468	47844510
no Peak	CNNM2	uc001kwm.2	chr10	104678113	104838238
no Peak	CNOT1	uc002enx.2	chr16	58577240	58663750
no Peak	CNOT4	uc011kpz.1	chr7	135046552	135194851
no Peak	CNOT6	uc003mlx.2	chr5	179921416	180005352
no Peak	CNPY2	uc001sku.1	chr12	56704216	56710120
no Peak	COG3	uc001vak.2	chr13	46039070	46110759
no Peak	COIL	uc002iuu.2	chr17	55015562	55038411
no Peak	COL4A3BP	uc003kdt.2	chr5	74666928	74807806
no Peak	COMMD7	uc002wya.3	chr20	31290493	31331814
no Peak	COPS4	uc003hob.2	chr4	83956238	83996970
no Peak	COPS5	uc010lyv.1	chr8	67963364	67974562
no Peak	COPS7B	uc010fxy.1	chr2	232646444	232673434
no Peak	COPZ1	uc001sfs.1	chr12	54718910	54745633
no Peak	CORO2A	uc004ayn.2	chr9	100918350	100954956
no Peak	COTL1	uc002fid.2	chr16	84599205	84651669
no Peak	COX10	uc002gof.3	chr17	13972718	14111992
no Peak	COX18	uc003hgm.1	chr4	73920415	73935472
no Peak	COX5A	uc002azi.3	chr15	75212618	75230495
no Peak	COX6B1	uc002oav.2	chr19	36139154	36149683
no Peak	COX7A2L	uc002rsl.2	chr2	42577646	42596150
no Peak	COX7B	uc004ecu.1	chrX	77154960	77160881
no Peak	CPD	uc002hfb.1	chr17	28705983	28795699
no Peak	CPSF1	uc011lle.1	chr8	145625381	145634575
no Peak	CPSF2	uc001yah.1	chr14	92588328	92630543
no Peak	CPT1A	uc001oof.3	chr11	68522090	68609399
no Peak	CR590086	uc003wsr.1	chr8	9412656	9414030
no Peak	CR604262	uc002zjk.2	chr21	47874901	47878593
no Peak	CR618966	uc003qsc.2	chr6	159463302	159469733
no Peak	CR625980	uc001hor.1	chr1	224622613	224709674
no Peak	CR626360	uc002ytn.2	chr21	35303425	35343487
no Peak	CR933665	uc003yrb.2	chr8	125474739	125486804
no Peak	CRADD	uc010sus.1	chr12	94071150	94288616
no Peak	CRCP	uc003tuv.2	chr7	65579804	65619551
no Peak	CREB3L2	uc003vtw.2	chr7	137559726	137686846
no Peak	CREBBP	uc002cvv.2	chr16	3775057	3930121
no Peak	CREBL2	uc001rap.1	chr12	12764830	12798041
no Peak	CRKRS	uc010wef.1	chr17	37617738	37682569
no Peak	CSE1L	uc002xty.2	chr20	47662837	47713484
no Peak	CSRP2BP	uc002wqj.2	chr20	18118526	18169015
no Peak	CSTF1	uc002xxl.1	chr20	54967426	54979582
no Peak	CTAGE5	uc001wuz.3	chr14	39734475	39820395
no Peak	CTCF	uc002etl.2	chr16	67596463	67673087
no Peak	CTNNBL1	uc010zvw.1	chr20	36322433	36500519
no Peak	CTNND1	uc001nlf.1	chr11	57480041	57564464
no Peak	CTSS	uc001evn.2	chr1	150702553	150738305
no Peak	CTU1	uc010eop.2	chr19	51600863	51611647
no Peak	CUL4B	uc004esw.2	chrX	119658447	119709684
no Peak	CUL5	uc001pjv.2	chr11	107879407	107978484
no Peak	CWC15	uc001pfd.3	chr11	94695788	94706776
no Peak	CWC22	uc002unp.2	chr2	180809603	180871840
no Peak	CXorf39	uc004elw.2	chrX	103411300	103436125
no Peak	CXorf42	uc004esm.2	chrX	119370310	119379122
no Peak	CYB561	uc002jat.2	chr17	61509665	61523722
no Peak	CYB5R4	uc003pkf.2	chr6	84569369	84670144
no Peak	CYHR1	uc003zcv.2	chr8	145675314	145690479
no Peak	CYLD	uc010cbs.1	chr16	50775960	50829635
no Peak	DAMS	uc003lbi.3	chr5	135465204	135470579
no Peak	DAP3	uc001fls.2	chr1	155658873	155708317
no Peak	DCAF12	uc003ztt.2	chr9	34086380	34126771
no Peak	DCAF5	uc001xkr.3	chr14	69555923	69619914
no Peak	DCAF8	uc001fvp.3	chr1	160209012	160232318
no Peak	DCAKD	uc002ihy.2	chr17	43111224	43128978
no Peak	DCK	uc003hfx.2	chr4	71859264	71896627
no Peak	DCLRE1B	uc001eeg.2	chr1	114448037	114456692
no Peak	DCP1B	uc010sdy.1	chr12	2050756	2113677
no Peak	DCTN4	uc011dck.1	chr5	150110977	150138147
no Peak	DCTN6	uc003xhy.2	chr8	30013812	30041059
no Peak	DCUN1D4	uc011bzn.1	chr4	52709275	52783001
no Peak	DDB1	uc009ynl.1	chr11	61089066	61100666
no Peak	DDHD1	uc001xai.2	chr14	53503458	53620046
no Peak	DDI2	uc001aww.2	chr1	15944069	15960794
no Peak	DDRGK1	uc002wic.2	chr20	3171017	3185295
no Peak	DDX10	uc001pkm.2	chr11	108535815	108811646
no Peak	DDX26B	uc004eyw.3	chrX	134654554	134716459
no Peak	DDX28	uc002evh.1	chr16	68055173	68057959
no Peak	DDX3X	uc004dfg.2	chrX	41192650	41223724
no Peak	DDX46	uc003kzw.2	chr5	134094460	134166809
no Peak	DDX47	uc001rav.2	chr12	12878850	12982909
no Peak	DDX51	uc001ujy.3	chr12	132621141	132628880
no Peak	DDX52	uc002hoj.1	chr17	35990852	36002800
no Peak	DDX58	uc003zra.2	chr9	32455300	32526322
no Peak	DDX60L	uc003irq.3	chr4	169277886	169401638
no Peak	DECR1	uc011lgc.1	chr8	91013579	91064227
no Peak	DENND1B	uc010ppe.1	chr1	197479508	197744623
no Peak	DENND2C	uc001eez.2	chr1	115064017	115213044
no Peak	DENND5A	uc001mhl.2	chr11	9160376	9286871
no Peak	DERL2	uc002gcc.1	chr17	5377612	5389494
no Peak	DEXI	uc002dal.2	chr16	11022749	11036257
no Peak	DGCR2	uc002zor.1	chr22	19023794	19109967
no Peak	DGKE	uc002ius.1	chr17	54912138	54943437
no Peak	DGUOK	uc002sjx.2	chr2	74153952	74186086
no Peak	DHX29	uc003jpx.2	chr5	54552073	54603521
no Peak	DHX33	uc002gca.2	chr17	5345593	5372181
no Peak	DHX38	uc002fcb.2	chr16	72127614	72146810
no Peak	DHX8	uc010wif.1	chr17	41561333	41594690
no Peak	DIP2B	uc001rwv.2	chr12	50898767	51142448
no Peak	DISC1	uc001huz.2	chr1	231762560	232177016
no Peak	DKFZp451F083	uc004eym.2	chrX	134382888	134477957
no Peak	DKFZp686B2235	uc003hio.1	chr4	76439653	76472540
no Peak	DKFZp686H12134	uc003ner.3	chr6	25081296	25138051
no Peak	DKFZp761G18121	uc002nog.2	chr19	19896650	19932560
no Peak	DLG1	uc010ial.2	chr3	196769431	197026143
no Peak	DLGAP1	uc002kmf.2	chr18	3498836	3880140
no Peak	DMXL1	uc010jcl.1	chr5	118407083	118584822
no Peak	DNAJB14	uc003hvl.2	chr4	100820711	100867879
no Peak	DNAJC13	uc003eor.2	chr3	132136552	132257875
no Peak	DNAJC15	uc001uyy.2	chr13	43597361	43683304
no Peak	DNAJC2	uc003vbr.1	chr7	102975688	102985320
no Peak	DNM1L	uc010skg.1	chr12	32832136	32884445
no Peak	DNMT3A	uc010eyi.2	chr2	25455845	25565459
no Peak	DOCK10	uc002vod.1	chr2	225725296	225907330
no Peak	DOCK11	uc004eqp.2	chrX	117629871	117820123
no Peak	DOCK2	uc011der.1	chr5	169064250	169510384
no Peak	DOCK8	uc003zgf.2	chr9	214864	465259
no Peak	DOHH	uc010xhl.1	chr19	3490819	3500938
no Peak	DPH5	uc001dtz.2	chr1	101455179	101491644
no Peak	DPP4	uc010fpb.2	chr2	162848756	162931052
no Peak	DPP9	uc002mba.2	chr19	4675245	4723855
no Peak	DPYD	uc001drv.2	chr1	97543301	98386615
no Peak	DRAP1	uc001ogj.1	chr11	65686727	65689031
no Peak	DSE	uc003pws.2	chr6	116601282	116759440
no Peak	DSTN	uc002wpq.2	chr20	17550598	17588651
no Peak	DTL	uc009xdc.2	chr1	212208918	212278186
no Peak	DUSP11	uc002sjp.2	chr2	73989325	74007284
no Peak	DUSP22	uc003msx.2	chr6	292100	351353
no Peak	DUSP7	uc003dct.2	chr3	52082938	52090461
no Peak	DVL2	uc010clz.1	chr17	7132605	7137863
no Peak	DYNC1LI2	uc002eqb.1	chr16	66754798	66785525
no Peak	DYRK2	uc001str.3	chr12	68042511	68056443
no Peak	E2F3	uc003nda.2	chr6	20402136	20493945
no Peak	E2F6	uc002rbe.2	chr2	11584501	11606297
no Peak	EBAG9	uc003ynf.2	chr8	110551928	110577389
no Peak	EBP	uc004djx.3	chrX	48380163	48387102
no Peak	ECE1	uc001bem.2	chr1	21543739	21672034
no Peak	ECH1	uc002oji.2	chr19	39306063	39322497
no Peak	EDEM3	uc010pol.1	chr1	184659626	184724041
no Peak	EEF1E1	uc011dic.1	chr6	8073594	8102828
no Peak	EEF2K	uc002dki.2	chr16	22217591	22300065
no Peak	EEFSEC	uc003eki.2	chr3	127872312	128127488
no Peak	EF413001	uc001guz.2	chr1	198867622	198906558
no Peak	EFCAB4B	uc010sen.1	chr12	3724100	3862366
no Peak	EFCAB5	uc010wbj.1	chr17	28256873	28401641
no Peak	EFHB	uc003cbm.2	chr3	19920967	19988501
no Peak	EHMT1	uc004cob.1	chr9	140513443	140686705
no Peak	EID2B	uc002olz.1	chr19	40021629	40023494
no Peak	EIF2B3	uc001cmt.1	chr1	45316449	45452282
no Peak	EIF2C3	uc001bzp.2	chr1	36396771	36522062
no Peak	EIF3B	uc003slx.2	chr7	2394473	2420375
no Peak	EIF3H	uc003yob.2	chr8	117657055	117778494
no Peak	EIF4E3	uc010hoc.2	chr3	71728441	71803924
no Peak	EIF4E	uc011ceb.1	chr4	99799606	99851786
no Peak	ELAVL1	uc002mjb.2	chr19	8023457	8070529
no Peak	ELF2	uc010ioh.2	chr4	139987181	140005647
no Peak	ELF4	uc004eve.3	chrX	129198895	129244688
no Peak	ELK4	uc001hcy.1	chr1	205585234	205602000
no Peak	ELOF1	uc002mse.1	chr19	11663857	11670051
no Peak	ELP3	uc003xgn.3	chr8	27947748	28048667
no Peak	Em:AC006547.7	uc002zrt.2	chr22	20193854	20196060
no Peak	EMB	uc003jom.2	chr5	49692032	49737234
no Peak	EPB41	uc001brk.2	chr1	29241090	29391731
no Peak	EPC2	uc010zbt.1	chr2	149402559	149545135
no Peak	EPHA4	uc002vmq.2	chr2	222282748	222437010
no Peak	EPM2AIP1	uc003cgk.2	chr3	37027357	37034795
no Peak	EPRS	uc001hly.1	chr1	220141941	220220000
no Peak	EPS15	uc001csr.1	chr1	51968781	51984995
no Peak	EPSTI1	uc001uyw.1	chr13	43462121	43566377
no Peak	ERBB2IP	uc003juk.1	chr5	65222383	65376850
no Peak	ERH	uc001xlc.2	chr14	69846839	69865021
no Peak	ERI1	uc003wsk.2	chr8	8860313	8890849
no Peak	ERICH1	uc011kwh.1	chr8	564748	681226
no Peak	ERMAP	uc010ojw.1	chr1	43282775	43305384
no Peak	ERO1LB	uc001hxt.2	chr1	236378423	236445339
no Peak	ESYT1	uc001sjq.2	chr12	56522053	56538452
no Peak	ETNK1	uc009ziz.2	chr12	22778075	22843607
no Peak	ETV6	uc001qzz.2	chr12	11802787	12048323
no Peak	EXOC2	uc003mte.2	chr6	485138	693109
no Peak	EXOC5	uc001xct.2	chr14	57669195	57735617
no Peak	EXOSC10	uc001asa.2	chr1	11126677	11159938
no Peak	EXOSC2	uc004bzu.2	chr9	133569157	133580452
no Peak	EXOSC7	uc003coh.1	chr3	45016749	45054158
no Peak	EXT1	uc003yok.1	chr8	118811601	119124058
no Peak	EXTL3	uc003xgz.1	chr8	28559152	28611202
no Peak	EYA3	uc001bpi.1	chr1	28300818	28415131
no Peak	F10	uc010fzz.2	chr20	825766	838103
no Peak	FAAH2	uc004dvc.2	chrX	57313109	57515627
no Peak	FAF1	uc001cse.1	chr1	50906934	51425936
no Peak	FAF2	uc003mej.3	chr5	175875355	175937074
no Peak	FAM100A	uc002cwx.2	chr16	4658883	4664927
no Peak	FAM108B1	uc004ail.2	chr9	74477369	74526148
no Peak	FAM111A	uc010rkp.1	chr11	58910317	58922509
no Peak	FAM116A	uc003dja.2	chr3	57611181	57678816
no Peak	FAM120A	uc004atx.2	chr9	96233422	96294869
no Peak	FAM120B	uc003qxp.2	chr6	170615843	170714236
no Peak	FAM120C	uc004dsz.3	chrX	54094758	54209714
no Peak	FAM126A	uc003svm.3	chr7	22980886	23053770
no Peak	FAM126B	uc002uwu.2	chr2	201838441	201936392
no Peak	FAM129A	uc001gra.2	chr1	184760166	184943682
no Peak	FAM134B	uc003jfs.2	chr5	16473147	16617118
no Peak	FAM160A2	uc001mcm.2	chr11	6237799	6255941
no Peak	FAM160B1	uc001lcc.2	chr10	116581502	116659585
no Peak	FAM173B	uc003jep.2	chr5	10226437	10250014
no Peak	FAM174A	uc003knj.1	chr5	99871123	99922440
no Peak	FAM175B	uc001lib.3	chr10	126490353	126525238
no Peak	FAM192A	uc002ekw.3	chr16	57186381	57219976
no Peak	FAM19A1	uc003dnd.2	chr3	68040733	68594769
no Peak	FAM20B	uc001gmc.2	chr1	178995073	179045701
no Peak	FAM35A	uc001kei.3	chr10	88854952	88951220
no Peak	FAM3A	uc004flw.1	chrX	153734505	153744535
no Peak	FAM3C	uc003vjx.2	chr7	120988906	121036422
no Peak	FAM40A	uc001dyz.1	chr1	110574198	110597424
no Peak	FAM53B	uc001lhu.1	chr10	126305648	126478907
no Peak	FAM65B	uc011djs.1	chr6	24804512	24936188
no Peak	FAM73A	uc001dhx.2	chr1	78245308	78344077
no Peak	FAM83D	uc002xjg.2	chr20	37554954	37581701
no Peak	FAM91A1	uc003yqv.2	chr8	124780881	124827688
no Peak	FAM98B	uc001zkb.1	chr15	38746327	38773829
no Peak	FANCF	uc001mql.1	chr11	22644078	22647387
no Peak	FAR1	uc001mld.2	chr11	13690205	13753891
no Peak	FARS2	uc010jnv.1	chr6	5261276	5771816
no Peak	FARSA	uc002mvs.2	chr19	13033283	13044558
no Peak	FAS	uc010qna.1	chr10	90729552	90775541
no Peak	FBL	uc010egr.2	chr19	40328905	40337054
no Peak	FBRS	uc002dzc.3	chr16	30671242	30682130
no Peak	FBXL14	uc001qjh.2	chr12	1675159	1703331
no Peak	FBXL17	uc011cvc.1	chr5	107194739	107717799
no Peak	FBXL18	uc003son.3	chr7	5515428	5553399
no Peak	FBXL20	uc010wed.1	chr17	37415383	37557876
no Peak	FBXL5	uc003gob.1	chr4	15606153	15657013
no Peak	FBXO18	uc001iir.2	chr10	5931534	5979555
no Peak	FBXO38	uc003lpf.1	chr5	147763545	147822399
no Peak	FBXO3	uc001mva.1	chr11	33768290	33796071
no Peak	FBXO42	uc001ayg.2	chr1	16576559	16678948
no Peak	FBXO45	uc010iai.2	chr3	196295724	196315928
no Peak	FBXO46	uc002pcz.2	chr19	46213888	46234151
no Peak	FBXO4	uc003jmq.2	chr5	41925355	41941663
no Peak	FBXO5	uc003qph.2	chr6	153291659	153304740
no Peak	FBXO8	uc003itq.2	chr4	175157811	175205402
no Peak	FBXW11	uc003mbm.1	chr5	171288555	171433877
no Peak	FBXW2	uc004bkm.1	chr9	123519253	123555740
no Peak	FBXW7	uc003imt.2	chr4	153242410	153456316
no Peak	FDFT1	uc010lsa.1	chr8	11660189	11689179
no Peak	FDX1	uc001pkx.2	chr11	110300593	110335604
no Peak	FHIT	uc010hnn.1	chr3	59735420	61237133
no Peak	FITM2	uc002xlr.1	chr20	42935196	42939889
no Peak	FKBP5	uc003okz.2	chr6	35548333	35656719
no Peak	FLI1	uc010sbt.1	chr11	128556429	128683161
no Peak	FLJ13197	uc003gte.1	chr4	38614321	38666249
no Peak	FLJ33630	uc003kuo.2	chr5	127276134	127419299
no Peak	FLJ37307	uc010tgq.1	chr13	52387482	52419286
no Peak	FMR1	uc011mwz.1	chrX	146993508	147015206
no Peak	FNDC3B	uc003fhy.2	chr3	171757417	172118490
no Peak	FNTA	uc003xps.2	chr8	42911441	42940923
no Peak	FOXJ2	uc001qtt.1	chr12	8185358	8202818
no Peak	FOXJ3	uc001chg.2	chr1	42642210	42801548
no Peak	FOXK1	uc003snb.1	chr7	4721929	4795175
no Peak	FOXK2	uc002kfn.2	chr17	80477593	80562481
no Peak	FOXN3	uc001xxo.3	chr14	89622516	90085494
no Peak	FOXO3	uc003psk.2	chr6	108881025	109005971
no Peak	FRG1	uc003izs.2	chr4	190861973	190884358
no Peak	FRS2	uc001suy.2	chr12	69864128	69973561
no Peak	FRYL	uc003gyk.2	chr4	48552521	48782316
no Peak	FTSJD2	uc010jwu.2	chr6	37400906	37429878
no Peak	FUNDC2	uc004fmw.2	chrX	154255063	154285190
no Peak	FUT11	uc001jva.2	chr10	75532048	75535974
no Peak	FUT8	uc001xin.2	chr14	65877839	66209961
no Peak	G6PD	uc004fly.1	chrX	153759605	153775787
no Peak	GAB3	uc004fml.1	chrX	153903526	153979858
no Peak	GABPA	uc002ylx.3	chr21	27106880	27144770
no Peak	GABPB1	uc001zya.2	chr15	50569389	50647605
no Peak	GALM	uc002rqy.2	chr2	38893051	38961908
no Peak	GALNT1	uc002kyz.3	chr18	33161777	33291797
no Peak	GALNT2	uc010pvy.1	chr1	230193535	230417875
no Peak	GALNT7	uc003isz.3	chr4	174089903	174245117
no Peak	GAN	uc002fgo.2	chr16	81348570	81413801
no Peak	GAPVD1	uc004bpq.2	chr9	128024110	128127289
no Peak	GARS	uc003tbm.2	chr7	30634180	30673646
no Peak	GATAD2B	uc001fdb.3	chr1	153777203	153895451
no Peak	GBF1	uc001kux.1	chr10	104005308	104142649
no Peak	GBP1	uc001dmx.2	chr1	89517986	89531043
no Peak	GBP4	uc001dnb.2	chr1	89646831	89664633
no Peak	GBP5	uc001dne.1	chr1	89728365	89738487
no Peak	GCC1	uc003vma.2	chr7	127220682	127225654
no Peak	GCH1	uc001xbl.1	chr14	55312360	55369542
no Peak	GCLC	uc003pbw.1	chr6	53362139	53409831
no Peak	GDAP2	uc001ehf.2	chr1	118406107	118472302
no Peak	GFI1	uc001dow.3	chr1	92940318	92952433
no Peak	GGPS1	uc001hwv.2	chr1	235491752	235507842
no Peak	GHITM	uc001kcs.1	chr10	85899184	85913311
no Peak	GJB7	uc003plo.2	chr6	87992696	88038996
no Peak	GLB1	uc011axk.1	chr3	33038099	33138694
no Peak	GLCCI1	uc003srk.2	chr7	8008422	8128707
no Peak	GLE1	uc004bvj.2	chr9	131266970	131304579
no Peak	GLG1	uc002fcx.2	chr16	74481327	74641042
no Peak	GLIPR2	uc003zyy.1	chr9	36136741	36163902
no Peak	GLRX3	uc001lko.2	chr10	131934662	131982784
no Peak	GLRX5	uc001yem.1	chr14	96001322	96011055
no Peak	GLT8D3	uc001rms.3	chr12	42475649	42538673
no Peak	GLTP	uc001tpm.2	chr12	110288748	110318293
no Peak	GLTSCR1	uc002phh.3	chr19	48111452	48206533
no Peak	GLUD1	uc001keh.2	chr10	88810245	88854623
no Peak	GMCL1	uc002sfu.2	chr2	70056817	70106730
no Peak	GMEB1	uc001bqz.2	chr1	28995243	29041385
no Peak	GMNN	uc003nem.2	chr6	24775158	24786276
no Peak	GMPS	uc003faq.2	chr3	155588324	155655518
no Peak	GNA12	uc003smu.2	chr7	2767742	2883959
no Peak	GNAQ	uc004akw.2	chr9	80335199	80646192
no Peak	GNB1L	uc002zqf.1	chr22	19775933	19842462
no Peak	GNL2	uc010oif.1	chr1	38042028	38061586
no Peak	GNL3L	uc004dth.1	chrX	54556643	54591973
no Peak	GNPAT	uc009xfo.1	chr1	231376918	231401911
no Peak	GNPTAB	uc001tit.2	chr12	102139277	102224632
no Peak	GOLGA3	uc001ula.1	chr12	133351083	133405288
no Peak	GOLGA4	uc003cgv.2	chr3	37284737	37408241
no Peak	GOSR1	uc002hfc.1	chr17	28804425	28812280
no Peak	GOT2	uc002eof.1	chr16	58741034	58768246
no Peak	GPA33	uc001gea.1	chr1	167022081	167059868
no Peak	GPATCH2	uc001hlf.1	chr1	217603833	217804409
no Peak	GPBP1L1	uc001coq.2	chr1	46092977	46152302
no Peak	GPD1L	uc003cew.2	chr3	32148143	32210196
no Peak	GPD2	uc002tzf.3	chr2	157291964	157442914
no Peak	GPHN	uc010tss.1	chr14	66974124	67648523
no Peak	GPR155	uc002uit.2	chr2	175296375	175351811
no Peak	GPR55	uc002vrf.2	chr2	231772033	231789941
no Peak	GPR65	uc001xvv.2	chr14	88471495	88478414
no Peak	GRAP2	uc003ayi.2	chr22	40297085	40380356
no Peak	GRB2	uc002jnx.3	chr17	73314157	73401790
no Peak	GRK5	uc001led.2	chr10	120967196	121215130
no Peak	GRLF1	uc010ekv.2	chr19	47421932	47508323
no Peak	GRSF1	uc010iia.1	chr4	71681498	71705627
no Peak	GSK3B	uc003edn.2	chr3	119540803	119813264
no Peak	GSN	uc004bld.1	chr9	123963760	124095120
no Peak	GSR	uc003xih.1	chr8	30536434	30585443
no Peak	GTDC1	uc002tvs.2	chr2	144703582	145090029
no Peak	GTF2E1	uc003edz.3	chr3	120461557	120501915
no Peak	GTF2E2	uc003xig.2	chr8	30436031	30515738
no Peak	GTF2F2	uc001uzw.2	chr13	45694630	45858237
no Peak	GTF2H1	uc001moi.2	chr11	18343815	18388590
no Peak	GTF2I	uc003uau.2	chr7	74072029	74175020
no Peak	GTF3C2	uc010eyz.1	chr2	27556469	27579868
no Peak	GTF3C4	uc010mzw.2	chr9	135545727	135565468
no Peak	HADHB	uc010ykv.1	chr2	26467615	26513332
no Peak	HAT1	uc002uhi.2	chr2	172778934	172848599
no Peak	HAUS8	uc002nfe.2	chr19	17160572	17186343
no Peak	hbet1	uc003une.3	chr7	93592084	93633690
no Peak	HDAC3	uc010jgd.1	chr5	141008739	141016423
no Peak	HDAC4	uc010fyz.1	chr2	240011371	240220334
no Peak	HEATR5B	uc002rpp.1	chr2	37208152	37311485
no Peak	HECTD1	uc001wre.2	chr14	31672276	31676915
no Peak	HECW2	uc002utm.1	chr2	197063976	197457335
no Peak	HELZ	uc002jfx.3	chr17	65066554	65241319
no Peak	HEMK1	uc003dau.2	chr3	50606582	50622419
no Peak	HERC4	uc001jnk.2	chr10	69828766	69835103
no Peak	HERPUD2	uc003tes.3	chr7	35672271	35734772
no Peak	HFM1	uc001doa.3	chr1	91726323	91870426
no Peak	HIATL2	uc004aws.2	chr9	99708328	99775862
no Peak	HIF1A	uc010tsc.1	chr14	62162118	62193536
no Peak	HINFP	uc001pvp.2	chr11	118992287	119005764
no Peak	HIPK2	uc003vvd.3	chr7	139246316	139477596
no Peak	HIPK3	uc001mul.1	chr11	33279167	33375939
no Peak	HIST1H2BK	uc003nix.1	chr6	27106072	27114619
no Peak	HIVEP2	uc003qjd.2	chr6	143072604	143266338
no Peak	HJURP	uc002vvg.2	chr2	234745486	234763212
no Peak	HK2	uc002snd.2	chr2	75059781	75120474
no Peak	HLTF	uc003ewq.1	chr3	148747903	148804341
no Peak	HMBOX1	uc010lve.2	chr8	28747910	28910240
no Peak	HMG20A	uc002bcq.1	chr15	77713242	77757355
no Peak	HMGCR	uc011cst.1	chr5	74632153	74657924
no Peak	HMGCS1	uc003jnr.3	chr5	43289493	43313595
no Peak	HNRNPD	uc003hmm.1	chr4	83274466	83295149
no Peak	HNRNPR	uc001bgp.3	chr1	23636276	23670853
no Peak	HOOK3	uc003xpr.2	chr8	42752032	42885681
no Peak	HP1BP3	uc010odh.1	chr1	21069170	21113799
no Peak	HPCAL1	uc002rak.2	chr2	10443039	10567742
no Peak	HPS4	uc003acl.2	chr22	26847446	26879820
no Peak	HRH2	uc003mdc.3	chr5	175085039	175113243
no Peak	HS2ST1	uc010osk.1	chr1	87380334	87575680
no Peak	HSD17B11	uc003hqp.2	chr4	88257690	88312455
no Peak	HSF2	uc003pyt.3	chr6	122720695	122741553
no Peak	HSPA14	uc001inf.2	chr10	14880260	14913738
no Peak	HSPB11	uc001cwi.1	chr1	54387233	54411288
no Peak	HTT	uc011bvq.1	chr4	3076407	3245686
no Peak	HYOU1	uc001pux.3	chr11	118914895	118927925
no Peak	HZF26	uc010ecu.1	chr19	21688436	21739068
no Peak	IDH2	uc002box.2	chr15	90627213	90645708
no Peak	IER3IP1	uc002lcu.2	chr18	44681414	44702745
no Peak	IFI16	uc001ftg.2	chr1	158979681	159024943
no Peak	IFI44	uc010orr.1	chr1	79115476	79127139
no Peak	IFNGR1	uc011edn.1	chr6	137524683	137540567
no Peak	IFRD1	uc003vgi.2	chr7	112090514	112098373
no Peak	IGHMBP2	uc001ooj.1	chr11	68671318	68697274
no Peak	IKBKG	uc011mzr.1	chrX	153770458	153793260
no Peak	IL10RB	uc002yrh.1	chr21	34621013	34655546
no Peak	IL15RA	uc001iiw.2	chr10	5994334	6020142
no Peak	IL2RA	uc001iiz.1	chr10	6053505	6104272
no Peak	IL2RB	uc003aqv.1	chr22	37521879	37545962
no Peak	IL6R	uc001fez.1	chr1	154377668	154440188
no Peak	IMMP2L	uc010ljr.1	chr7	110303109	111202538
no Peak	IMMT	uc002srd.2	chr2	86385498	86422893
no Peak	IMPAD1	uc003xte.3	chr8	57870490	57906427
no Peak	ING4	uc001qpv.3	chr12	6759704	6772308
no Peak	INO80C	uc002kyw.1	chr18	33033289	33077955
no Peak	INO80D	uc002vaz.3	chr2	206858445	206950906
no Peak	INPP4A	uc010yvj.1	chr2	99061320	99198284
no Peak	INPP5A	uc001llo.1	chr10	134351352	134591381
no Peak	INPP5B	uc001cch.2	chr1	38394213	38411522
no Peak	INPP5E	uc004cho.2	chr9	139323074	139334256
no Peak	INSIG2	uc002tlk.2	chr2	118846049	118867596
no Peak	INTS1	uc003skq.2	chr7	1537980	1544018
no Peak	IPO5	uc001vne.2	chr13	98605928	98676549
no Peak	IPO8	uc001rjd.2	chr12	30781922	30848751
no Peak	IQGAP1	uc002bpl.1	chr15	90931472	91045475
no Peak	IRAK2	uc003bve.1	chr3	10206562	10285427
no Peak	IREB2	uc002bdr.2	chr15	78730517	78793798
no Peak	IRF2	uc003iwf.3	chr4	185308877	185395726
no Peak	ISOC1	uc003kva.2	chr5	128430441	128449717
no Peak	ITGA6	uc010zdy.1	chr2	173292081	173371181
no Peak	ITGAE	uc002fwo.3	chr17	3617919	3704537
no Peak	ITGB2	uc002zgg.2	chr21	46305867	46348753
no Peak	ITPR1	uc003bqa.2	chr3	4535033	4889286
no Peak	ITPR2	uc001rhh.1	chr12	26869076	26986131
no Peak	ITPRIPL1	uc002svx.2	chr2	96991061	96994090
no Peak	ITSN2	uc002rfe.2	chr2	24425734	24583397
no Peak	JAK3	uc002nhn.3	chr19	17935594	17958841
no Peak	JARID2	uc011diw.1	chr6	15401088	15509585
no Peak	JKAMP	uc001xeg.3	chr14	59951160	59972080
no Peak	JMJD1C	uc001jmr.1	chr10	65139713	65225722
no Peak	JMJD5	uc010bxv.2	chr16	27214806	27223036
no Peak	JRK	uc003ywo.2	chr8	143738874	143751401
no Peak	KARS	uc010cha.1	chr16	75675461	75682541
no Peak	KAT2B	uc003cbq.2	chr3	20081523	20195894
no Peak	KATNA1	uc003qms.2	chr6	149916171	149969850
no Peak	KATNAL1	uc001ust.2	chr13	30776767	30881584
no Peak	KBTBD6	uc001uxu.1	chr13	41701708	41706936
no Peak	KCMF1	uc002sox.3	chr2	85198230	85286594
no Peak	KCNQ1	uc001lwn.2	chr11	2466220	2870339
no Peak	KDM4C	uc003zkh.2	chr9	6757640	7175647
no Peak	KDM5B	uc009xag.2	chr1	202696532	202777549
no Peak	KDM5C	uc011moc.1	chrX	53205460	53254604
no Peak	KEAP1	uc002mor.1	chr19	10596795	10614054
no Peak	KHDRBS1	uc001bub.2	chr1	32479490	32509471
no Peak	KIAA0040	uc009wws.2	chr1	175126122	175161949
no Peak	KIAA0174	uc010vmk.1	chr16	71929445	71956583
no Peak	KIAA0226	uc003fyd.3	chr3	197398258	197476568
no Peak	KIAA0240	uc003osn.1	chr6	42749789	42836296
no Peak	KIAA0317	uc001xqc.2	chr14	75137345	75179807
no Peak	KIAA0319L	uc001byx.2	chr1	35899091	36023037
no Peak	KIAA0355	uc010edk.1	chr19	34756462	34791873
no Peak	KIAA0368	uc004bfe.1	chr9	114122972	114247025
no Peak	KIAA0427	uc002ldd.2	chr18	46065426	46389578
no Peak	KIAA0430	uc002ddr.2	chr16	15688244	15737009
no Peak	KIAA0467	uc009vws.1	chr1	43855555	43892209
no Peak	KIAA0528	uc010sit.1	chr12	22601525	22697452
no Peak	KIAA0564	uc001uyj.2	chr13	42140961	42535221
no Peak	KIAA0922	uc010ipp.2	chr4	154387497	154557860
no Peak	KIAA1012	uc002kxd.3	chr18	29409136	29523099
no Peak	KIAA1279	uc001joy.2	chr10	70748492	70776734
no Peak	KIAA1324L	uc011kha.1	chr7	86509237	86689014
no Peak	KIAA1429	uc003ygo.1	chr8	95500599	95565688
no Peak	KIAA1430	uc003ixf.3	chr4	186080822	186125182
no Peak	KIAA1468	uc002lil.2	chr18	59854523	59974354
no Peak	KIAA1529	uc004axe.1	chr9	100000778	100139569
no Peak	KIAA1618	uc002jyf.2	chr17	78234666	78295260
no Peak	KIAA1632	uc002lbo.1	chr18	43487829	43547305
no Peak	KIAA1704	uc001uzs.2	chr13	45563686	45607742
no Peak	KIAA1712	uc003its.2	chr4	175205054	175254531
no Peak	KIAA1737	uc001xtd.2	chr14	77564577	77583629
no Peak	KIAA1826	uc001piz.2	chr11	105878629	105892954
no Peak	KIAA2013	uc001atl.1	chr1	11982231	11986480
no Peak	KIAA2018	uc003eam.2	chr3	113367234	113415493
no Peak	KIAA2026	uc003zjq.3	chr9	5919009	6008003
no Peak	KIDINS220	uc010yiv.1	chr2	8865689	8977755
no Peak	KIF11	uc001kic.2	chr10	94352824	94415150
no Peak	KIF18A	uc001msc.2	chr11	28042162	28129746
no Peak	KIF18B	uc010wji.1	chr17	43003448	43025082
no Peak	KIF1B	uc001aqw.3	chr1	10270763	10441659
no Peak	KIF20B	uc001kgr.1	chr10	91461366	91534700
no Peak	KIF3B	uc002wxq.2	chr20	30865466	30922809
no Peak	KLF12	uc010aeq.2	chr13	74260149	74708394
no Peak	KLF9	uc004aht.2	chr9	72999514	73029573
no Peak	KLHL11	uc002hyf.1	chr17	40009798	40021629
no Peak	KLHL15	uc004dba.3	chrX	24001835	24045303
no Peak	KLHL28	uc001wvr.2	chr14	45393527	45431179
no Peak	KLHL5	uc003gtp.2	chr4	39046658	39123828
no Peak	KLHL7	uc003svr.3	chr7	23145352	23215036
no Peak	KLHL8	uc003hql.1	chr4	88082213	88141674
no Peak	KLRAQ1	uc002rwl.2	chr2	48667907	48742524
no Peak	KLRG1	uc001qvh.2	chr12	9142220	9163338
no Peak	KPNA3	uc001vdj.2	chr13	50273442	50367057
no Peak	KPNA5	uc003pxh.2	chr6	117002366	117063029
no Peak	KRIT1	uc003ulu.1	chr7	91828282	91875414
no Peak	KTN1	uc001xcb.2	chr14	56046924	56151301
no Peak	LAIR1	uc010yex.1	chr19	54865234	54882164
no Peak	LAMP2	uc004est.3	chrX	119560003	119603204
no Peak	LAPTM4A	uc002rdm.2	chr2	20232411	20251789
no Peak	LARP4	uc001rwo.1	chr12	50794649	50873788
no Peak	LARP7	uc003iaz.2	chr4	113558119	113578741
no Peak	LATS1	uc003qmw.2	chr6	150004055	150039392
no Peak	LCK	uc001bux.2	chr1	32716839	32751765
no Peak	LCLAT1	uc002rnj.2	chr2	30670122	30867090
no Peak	LEO1	uc002abo.2	chr15	52230224	52263958
no Peak	LEPRE1	uc001chv.2	chr1	43212005	43232755
no Peak	LETM1	uc003gdv.2	chr4	1813207	1857974
no Peak	LIG1	uc002pia.1	chr19	48618702	48673560
no Peak	LIG3	uc010cth.1	chr17	33307548	33321450
no Peak	LIG4	uc001vqp.2	chr13	108859793	108870716
no Peak	LIMA1	uc010smr.1	chr12	50569564	50677353
no Peak	LIN54	uc010ijv.2	chr4	83845755	83934040
no Peak	LIN9	uc001hqc.2	chr1	226418860	226497570
no Peak	LIPA	uc001kgb.3	chr10	90973327	91174382
no Peak	LMBRD1	uc003pfa.2	chr6	70385750	70506888
no Peak	LMF2	uc003blp.2	chr22	50941375	50946135
no Peak	LMNB1	uc010jdb.1	chr5	126112832	126172709
no Peak	LMTK2	uc003upd.1	chr7	97736196	97835601
no Peak	LNP1	uc003dtx.3	chr3	100120036	100175169
no Peak	LNPEP	uc003kmv.1	chr5	96271345	96365115
no Peak	LNX2	uc001url.3	chr13	28120051	28194720
no Peak	LOC100128164	uc011bpp.1	chr3	169661773	169684522
no Peak	LOC100271722	uc011aqv.1	chr22	46435788	46440748
no Peak	LOC100287227	uc011boq.1	chr3	156390963	156393502
no Peak	LOC221710	uc011dio.1	chr6	11094265	11138964
no Peak	LOC283922	uc010vms.1	chr16	74366303	74402153
no Peak	LOC285456	uc003hyy.2	chr4	109459345	109541613
no Peak	LOC388906	uc003bcl.2	chr22	42665758	42670867
no Peak	LOC399815	uc001lgu.3	chr10	124612012	124648239
no Peak	LOC401307	uc011jxf.1	chr7	7712939	7918849
no Peak	LOC402377	uc011lyd.1	chr9	123555774	123561009
no Peak	LOC441242	uc003tud.1	chr7	65112465	65235797
no Peak	LOC493754	uc010lac.1	chr7	65993445	66057363
no Peak	LOC641518	uc003hyx.2	chr4	109093275	109097585
no Peak	LOC728855	uc009wlc.2	chr1	149576452	149672983
no Peak	LOC91316	uc011aiz.1	chr22	23980676	24059610
no Peak	LPCAT1	uc003jcm.2	chr5	1461543	1524076
no Peak	LRCH1	uc001vbl.3	chr13	47127295	47327173
no Peak	LRCH3	uc011bul.1	chr3	197518144	197611043
no Peak	LRIG2	uc009wgn.1	chr1	113615830	113667342
no Peak	LRPPRC	uc002rtr.2	chr2	44113362	44223144
no Peak	LRRC16A	uc010jpy.2	chr6	25279647	25620756
no Peak	LRRC33	uc003fwv.2	chr3	196366655	196388872
no Peak	LRRC40	uc001der.1	chr1	70610496	70671275
no Peak	LRRC58	uc003edr.2	chr3	120043575	120068186
no Peak	LRRC68	uc002pas.2	chr19	45596219	45644673
no Peak	LRRC8D	uc001dnm.2	chr1	90286572	90401987
no Peak	LSM10	uc001cao.1	chr1	36859030	36863493
no Peak	LSM14B	uc002ybt.2	chr20	60697516	60704636
no Peak	LUZP1	uc001bgl.2	chr1	23416920	23495517
no Peak	LY9	uc001fwy.1	chr1	160769542	160793586
no Peak	LYAR	uc003ght.2	chr4	4269430	4291896
no Peak	LYPLAL1	uc001hlq.3	chr1	219347191	219386206
no Peak	LYRM7	uc003kvg.1	chr5	130506640	130541119
no Peak	LYST	uc001hxj.2	chr1	235824344	236030220
no Peak	LZTFL1	uc003coy.1	chr3	45865445	45957534
no Peak	MAGED1	uc004dpm.2	chrX	51546154	51645448
no Peak	MAML2	uc001pfw.1	chr11	95711439	96076344
no Peak	MAN1A2	uc001ehd.1	chr1	117910084	118068320
no Peak	MAN2A1	uc003kou.1	chr5	109025155	109203429
no Peak	MANEA	uc003pon.2	chr6	96025412	96035252
no Peak	MAP2K4	uc002gnk.2	chr17	11924134	12047050
no Peak	MAP2K6	uc002jij.2	chr17	67410837	67538462
no Peak	MAP3K1	uc003jqw.3	chr5	56110899	56191976
no Peak	MAP3K5	uc011edk.1	chr6	136883640	137110761
no Peak	MAP3K7IP1	uc003axu.1	chr22	39795758	39833132
no Peak	MAP3K7IP3	uc004dck.2	chrX	30845559	30993201
no Peak	MAP3K7	uc003pnz.1	chr6	91225352	91296907
no Peak	MAP4K3	uc002rro.2	chr2	39476422	39664219
no Peak	MAP4	uc003csf.3	chr3	47952552	48130769
no Peak	MAP7D1	uc001caa.2	chr1	36621802	36646436
no Peak	MAPK14	uc003olp.2	chr6	35995453	36079012
no Peak	MAPK9	uc003mls.3	chr5	179660596	179719071
no Peak	MAPKAPK3	uc003day.1	chr3	50649338	50686719
no Peak	MAPKAPK5	uc001tsz.2	chr12	112280278	112331227
no Peak	MARCH3	uc003kuf.2	chr5	126203406	126366440
no Peak	MBD2	uc002lfg.1	chr18	51680574	51751158
no Peak	MBIP	uc001wtm.2	chr14	36767763	36789882
no Peak	MBOAT1	uc003ncx.1	chr6	20100934	20212670
no Peak	MBTD1	uc002itr.3	chr17	49254787	49337427
no Peak	MCART6	uc004elu.2	chrX	103343898	103401708
no Peak	MCEE	uc002shs.2	chr2	71336805	71357394
no Peak	MCFD2	uc010fba.2	chr2	47129016	47168878
no Peak	MCM3	uc003pan.1	chr6	52128811	52149582
no Peak	MCTP2	uc010boj.2	chr15	94774954	95027180
no Peak	MDFIC	uc003vhf.2	chr7	114562208	114659263
no Peak	MDH1	uc002scj.1	chr2	63816121	63834328
no Peak	MDM2	uc001sui.2	chr12	69201970	69239211
no Peak	MDM4	uc001hbd.1	chr1	204485510	204677661
no Peak	MDN1	uc003pnn.1	chr6	90353230	90529442
no Peak	ME2	uc002ley.2	chr18	48405434	48474258
no Peak	MED13L	uc001tvw.2	chr12	116396382	116714991
no Peak	MED13	uc002izo.2	chr17	60019966	60142643
no Peak	MED17	uc001pel.2	chr11	93517404	93522962
no Peak	MED21	uc001rhp.1	chr12	27175482	27182682
no Peak	MED25	uc010enl.1	chr19	50321545	50323207
no Peak	MED27	uc004cbe.1	chr9	134735498	134955253
no Peak	MED4	uc010tgf.1	chr13	48650091	48669251
no Peak	MED6	uc001xmf.2	chr14	71050957	71067384
no Peak	MED8	uc001cjg.3	chr1	43850397	43855483
no Peak	MEGF9	uc004bkj.1	chr9	123363090	123476612
no Peak	METAP1	uc003huf.3	chr4	99916787	99983959
no Peak	METT5D1	uc001msg.2	chr11	28129797	28355054
no Peak	METTL6	uc003bzs.1	chr3	15451376	15469042
no Peak	MFAP3	uc003lvf.2	chr5	153418518	153437014
no Peak	MFHAS1	uc003wsj.1	chr8	8641998	8751131
no Peak	MFN2	uc001atn.3	chr1	12040237	12073571
no Peak	MFSD8	uc003ifp.2	chr4	128838960	128887139
no Peak	MGMT	uc001lkh.2	chr10	131265453	131565783
no Peak	MIB1	uc002ktp.2	chr18	19284917	19450910
no Peak	MICA	uc003ntk.1	chr6	31371370	31383090
no Peak	MICB	uc011dnm.1	chr6	31462657	31478898
no Peak	MIER1	uc001dda.3	chr1	67390577	67413922
no Peak	MKI67	uc001lke.2	chr10	129894926	129924468
no Peak	MKKS	uc002wnu.1	chr20	10385832	10414866
no Peak	MKL2	uc002dcg.2	chr16	14165195	14360629
no Peak	MLEC	uc001tyy.1	chr12	121124948	121139667
no Peak	MLKL	uc002fdb.2	chr16	74705752	74734789
no Peak	MLLT1	uc002mek.2	chr19	6210392	6279959
no Peak	MLLT3	uc003zoe.2	chr9	20344967	20622514
no Peak	MLYCD	uc002fgz.2	chr16	83932729	83949785
no Peak	MMAA	uc003ikh.3	chr4	146540539	146581186
no Peak	MND1	uc003ink.1	chr4	154265800	154336243
no Peak	MOBKL1A	uc011cba.1	chr4	71768063	71853890
no Peak	MOBKL1B	uc002ski.2	chr2	74391148	74405995
no Peak	MPHOSPH8	uc001umf.1	chr13	20207879	20221775
no Peak	MPP7	uc009xla.2	chr10	28339922	28591995
no Peak	MRPL14	uc003owp.2	chr6	44081373	44095191
no Peak	MRPL1	uc003hku.2	chr4	78783804	78873944
no Peak	MRPL22	uc003lvy.3	chr5	154320632	154348970
no Peak	MRPL32	uc003tia.2	chr7	42971938	42977451
no Peak	MRPS15	uc001cas.2	chr1	36921361	36930040
no Peak	MRPS27	uc011cse.1	chr5	71515237	71616084
no Peak	MRPS31	uc001uxm.3	chr13	41303432	41345347
no Peak	MRPS5	uc002sub.2	chr2	95752952	95787754
no Peak	MRPS6	uc002ytp.2	chr21	35445822	35515334
no Peak	MSH2	uc002rvz.2	chr2	47630262	47906508
no Peak	MSI2	uc010wnm.1	chr17	55333211	55757299
no Peak	MSL3	uc004cuw.2	chrX	11776277	11793870
no Peak	MTERF	uc010let.1	chr7	91431459	91510016
no Peak	MTF1	uc009vvj.1	chr1	38287792	38325292
no Peak	MTFR1	uc011lep.1	chr8	66556887	66620572
no Peak	MTHFS	uc002bex.3	chr15	80137319	80189370
no Peak	MTMR12	uc003jhq.2	chr5	32227111	32313114
no Peak	MTMR3	uc003agu.3	chr22	30279157	30426855
no Peak	MTMR6	uc001uqe.1	chr13	25802306	25861704
no Peak	MTPAP	uc001ivb.3	chr10	30598730	30663377
no Peak	MTPN	uc003vte.3	chr7	135611504	135662204
no Peak	MTRF1L	uc003qpi.3	chr6	153308400	153323925
no Peak	MTRR	uc010itn.1	chr5	7869216	7885967
no Peak	MTR	uc010pxv.1	chr1	236958580	236979843
no Peak	MTX2	uc002ukw.2	chr2	177134122	177202751
no Peak	MUT	uc003ozg.3	chr6	49398993	49431031
no Peak	MXD4	uc003gev.1	chr4	2259708	2263739
no Peak	MYBL1	uc003xwj.2	chr8	67474410	67525480
no Peak	MYB	uc003qfv.2	chr6	135502452	135540313
no Peak	MYC	uc010mdq.2	chr8	128806778	129113498
no Peak	MYL12A	uc002klr.2	chr18	3247527	3256228
no Peak	MYO18A	uc002hdt.1	chr17	27400527	27507407
no Peak	MYO5A	uc002aby.2	chr15	52599479	52821247
no Peak	MYST2	uc002ipl.1	chr17	47866070	47899152
no Peak	MYST4	uc001jwn.1	chr10	76586378	76792639
no Peak	N4BP2	uc010ifq.2	chr4	40058523	40157017
no Peak	NAB1	uc002usb.2	chr2	191513847	191557491
no Peak	NADK	uc001aie.2	chr1	1682677	1711508
no Peak	NAF1	uc010iqw.1	chr4	164047859	164088073
no Peak	NAGK	uc002shp.3	chr2	71295407	71305769
no Peak	NAIF1	uc004bta.2	chr9	130823512	130829599
no Peak	NAMPT	uc003vdq.2	chr7	105888733	105925638
no Peak	NAPG	uc002kon.2	chr18	10525872	10552762
no Peak	NARG1L	uc001uyf.2	chr13	41885340	41951166
no Peak	NARG1	uc003ihu.1	chr4	140222675	140311935
no Peak	NARG2	uc002ago.2	chr15	60711808	60771344
no Peak	NCALD	uc003ykl.2	chr8	102698770	103137135
no Peak	NCAPD2	uc009zen.1	chr12	6603297	6637494
no Peak	NCAPG2	uc003wnw.1	chr7	158424002	158497520
no Peak	NCK1	uc003erh.2	chr3	136581072	136667967
no Peak	NCKAP1L	uc001sgc.3	chr12	54891494	54936898
no Peak	NCLN	uc002lxi.2	chr19	3185874	3209572
no Peak	NCOA2	uc003xyn.1	chr8	71024266	71316020
no Peak	NCSTN	uc009wtk.1	chr1	160313062	160319460
no Peak	NDC80	uc002kli.2	chr18	2571509	2616633
no Peak	NDUFA10	uc002vyn.2	chr2	240900157	240964798
no Peak	NDUFA12	uc001tdl.2	chr12	95365111	95397511
no Peak	NDUFA8	uc004blv.2	chr9	124906339	124922098
no Peak	NDUFB3	uc002uwx.3	chr2	201936461	201950471
no Peak	NDUFB5	uc003fkc.2	chr3	179322574	179342287
no Peak	NDUFC1	uc003iht.2	chr4	140211091	140222358
no Peak	NDUFS1	uc002vbe.2	chr2	206987803	207024187
no Peak	NDUFS4	uc003jpe.2	chr5	52856464	52979171
no Peak	NDUFS8	uc010rpz.1	chr11	67798093	67801197
no Peak	NDUFV3	uc002zcm.2	chr21	44313377	44329772
no Peak	NECAP1	uc001qtx.2	chr12	8234806	8250373
no Peak	NEDD1	uc001teu.3	chr12	97301000	97347461
no Peak	NEDD8	uc001wnp.2	chr14	24695810	24701576
no Peak	NEDD9	uc003mzw.3	chr6	11183530	11382581
no Peak	NEK7	uc001gun.3	chr1	198126107	198291546
no Peak	NELL2	uc001roi.1	chr12	44917073	45270880
no Peak	NF1	uc002hgg.2	chr17	29421994	29704694
no Peak	NFATC1	uc002lnd.2	chr18	77155771	77289322
no Peak	NFATC2	uc010zyx.1	chr20	50007765	50179168
no Peak	NFATC3	uc010vkl.1	chr16	68118653	68226113
no Peak	NFIC	uc002lxo.2	chr19	3359615	3463602
no Peak	NFKBID	uc002oci.1	chr19	36379142	36391552
no Peak	NFRKB	uc001qfh.2	chr11	129733670	129765490
no Peak	NFYB	uc009zum.1	chr12	104524909	104532040
no Peak	NFYC	uc001cfx.3	chr1	41157241	41237273
no Peak	NHEDC2	uc011cew.1	chr4	103946653	103998439
no Peak	NHEJ1	uc002vjq.3	chr2	219940050	220034817
no Peak	NHP2L1	uc003baw.2	chr22	42069937	42084913
no Peak	NIPA1	uc001yve.2	chr15	23043280	23086843
no Peak	NIPAL3	uc009vrc.2	chr1	24742244	24799472
no Peak	NLK	uc010cri.1	chr17	26369687	26523402
no Peak	NMI	uc002txi.2	chr2	152126981	152146430
no Peak	NOC3L	uc001kjq.1	chr10	96092988	96122683
no Peak	NOD1	uc003tav.2	chr7	30464143	30518393
no Peak	NOD2	uc010cbk.1	chr16	50727513	50746284
no Peak	NOL10	uc002raq.2	chr2	10710893	10830112
no Peak	NOL9	uc001ans.2	chr1	6585209	6614581
no Peak	NOLC1	uc001kuo.2	chr10	103911932	103923627
no Peak	NOP16	uc011dfm.1	chr5	175813024	175815540
no Peak	NOTCH1	uc004chz.2	chr9	139388896	139440238
no Peak	NOTCH2	uc001eik.2	chr1	120454177	120612276
no Peak	NPAT	uc001pjz.3	chr11	108028120	108093365
no Peak	NPC1	uc010xba.1	chr18	21119693	21166581
no Peak	NPEPPS	uc010wkt.1	chr17	45600322	45700641
no Peak	NPIPL2	uc010vct.1	chr16	28467697	29415809
no Peak	NQO2	uc003mup.1	chr6	2988200	3015940
no Peak	NR_024104	uc002dkb.1	chr16	22019529	22098852
no Peak	NR2C1	uc001tdm.3	chr12	95414059	95467404
no Peak	NRF1	uc003vpa.2	chr7	129251554	129396920
no Peak	NS5ATP3	uc002tkt.2	chr2	114471930	114514270
no Peak	NSDHL	uc004fgt.1	chrX	151999510	152037907
no Peak	NSMAF	uc003xtu.2	chr8	59513758	59572404
no Peak	NSUN3	uc003drl.1	chr3	93781854	93845630
no Peak	NT5C2	uc001kwo.2	chr10	104845939	104953056
no Peak	NUDCD1	uc010mcl.2	chr8	110253148	110346350
no Peak	NUDT19	uc010edf.2	chr19	33182866	33204701
no Peak	NUDT21	uc002eja.2	chr16	56463048	56485261
no Peak	NUDT3	uc003ojl.2	chr6	34256001	34360441
no Peak	NUP133	uc001htn.2	chr1	229577044	229644088
no Peak	NUP155	uc003jku.1	chr5	37291940	37371197
no Peak	NUP160	uc001ngm.2	chr11	47799670	47870057
no Peak	NUP205	uc003vsw.2	chr7	135242661	135333489
no Peak	NUP210	uc003bxv.1	chr3	13357736	13461809
no Peak	NUP35	uc010zfs.1	chr2	183984749	184026407
no Peak	NUP93	uc002eka.2	chr16	56764016	56878676
no Peak	NUP98	uc001lyh.2	chr11	3696240	3818892
no Peak	NUPL1	uc001uqi.2	chr13	25875665	25916560
no Peak	NUSAP1	uc001znq.3	chr15	41624891	41673247
no Peak	NVL	uc001hok.2	chr1	224415036	224517872
no Peak	NXF1	uc010rmh.1	chr11	62566010	62572964
no Peak	OAS1	uc009zwf.2	chr12	113344738	113369988
no Peak	OAS2	uc001tuj.2	chr12	113416273	113449527
no Peak	OBFC1	uc001kxn.2	chr10	105637319	105678045
no Peak	OCIAD1	uc003gyo.2	chr4	48833014	48863831
no Peak	ODZ1	uc011muj.1	chrX	123509756	124097666
no Peak	OGDH	uc003tlm.2	chr7	44646170	44716194
no Peak	OGFOD1	uc002ejb.2	chr16	56485423	56511406
no Peak	OLFM2	uc002mmo.2	chr19	9964394	9968844
no Peak	OPA1	uc003ftg.2	chr3	193310932	193415599
no Peak	OPA3	uc010xxk.1	chr19	46052411	46105466
no Peak	OPTN	uc001ilu.1	chr10	13142081	13180276
no Peak	ORC2L	uc002uwr.2	chr2	201774894	201828410
no Peak	ORC4L	uc002twk.2	chr2	148691732	148779136
no Peak	ORC5L	uc011klp.1	chr7	103766789	103848463
no Peak	ORMDL1	uc002urd.3	chr2	190634993	190649097
no Peak	OSBPL11	uc003eic.2	chr3	125247707	125314381
no Peak	OSBPL3	uc003sxf.2	chr7	24836164	25019760
no Peak	OSGIN2	uc003yeg.2	chr8	90914095	90940093
no Peak	OSTC	uc003hzb.1	chr4	109571740	109588980
no Peak	OTUD1	uc001irr.1	chr10	23728197	23731308
no Peak	OTUD4	uc003ikb.3	chr4	146080289	146100832
no Peak	OXSR1	uc003chy.2	chr3	38207025	38296978
no Peak	P4HA1	uc010qka.1	chr10	74766981	74856732
no Peak	P53TG1	uc003uip.3	chr7	86954665	86974831
no Peak	PACSIN2	uc003bdg.3	chr22	43266938	43411151
no Peak	PAFAH1B2	uc001pqe.1	chr11	117015039	117038814
no Peak	PAFAH2	uc001bld.3	chr1	26286259	26324648
no Peak	PAK1IP1	uc003mzg.2	chr6	10695187	10709968
no Peak	PAK4	uc002okj.1	chr19	39616419	39670046
no Peak	PAN3	uc010tdo.1	chr13	28712642	28846450
no Peak	PANK3	uc003lzz.1	chr5	167982629	168006588
no Peak	PAPOLG	uc002sai.2	chr2	60983382	61026096
no Peak	PARK7	uc001aow.3	chr1	8021713	8032014
no Peak	PARP10	uc010mfn.1	chr8	145058711	145060635
no Peak	PARP1	uc001hqd.3	chr1	226548392	226595801
no Peak	PARP4	uc001upl.2	chr13	24995074	25086948
no Peak	PARP9	uc003efi.2	chr3	122246761	122283523
no Peak	PATL1	uc001noe.3	chr11	59404193	59436511
no Peak	PBLD	uc001jns.1	chr10	70042416	70092684
no Peak	PBX3	uc004bqb.2	chr9	128509616	128729653
no Peak	PCBP2	uc010soh.1	chr12	53835432	53861312
no Peak	PCBP3	uc010gqb.2	chr21	47063682	47355617
no Peak	PCF11	uc010rsu.1	chr11	82868136	82881037
no Peak	PCGF5	uc001khh.2	chr10	92922774	93044020
no Peak	PCID2	uc001vtg.1	chr13	113851332	113862962
no Peak	PCMT1	uc003qnc.2	chr6	150070830	150132556
no Peak	PCMTD1	uc003xqw.3	chr8	52730140	52811735
no Peak	PCNT	uc002zji.3	chr21	47744035	47865681
no Peak	PDCD10	uc003fey.2	chr3	167401696	167452651
no Peak	PDCD6IP	uc003cfy.2	chr3	33840065	33911194
no Peak	PDE3A	uc001reh.1	chr12	20522196	20833881
no Peak	PDE3B	uc001mln.2	chr11	14665268	14893602
no Peak	PDE8A	uc010bnc.2	chr15	85525204	85682370
no Peak	PDGFRA	uc003haa.2	chr4	54243819	55164411
no Peak	PDHX	uc001mvt.2	chr11	34937676	35017674
no Peak	PDIA4	uc003wff.2	chr7	148700153	148725782
no Peak	PDK1	uc010zea.1	chr2	173420100	173489823
no Peak	PDK3	uc004dbh.2	chrX	24483343	24557952
no Peak	PDP1	uc003ygf.2	chr8	94929082	94938294
no Peak	PDS5A	uc003guv.3	chr4	39824483	39979576
no Peak	PDSS2	uc003prt.2	chr6	107473760	107780779
no Peak	PDXDC1	uc002ddc.2	chr16	15068832	15233195
no Peak	PDZD8	uc001lde.1	chr10	119042605	119134937
no Peak	PELI2	uc001xch.2	chr14	56585092	56768030
no Peak	PELP1	uc010vsf.1	chr17	4574679	4607632
no Peak	PEX13	uc002sau.3	chr2	61244811	61279124
no Peak	PEX14	uc001arn.2	chr1	10535002	10690813
no Peak	PEX1	uc003uly.2	chr7	92116337	92157845
no Peak	PFKL	uc011afd.1	chr21	45719924	45733026
no Peak	PGBD2	uc009xhd.2	chr1	249200441	249213344
no Peak	PGGT1B	uc003kqw.3	chr5	114546527	114598569
no Peak	PGM2L1	uc001ovb.1	chr11	74041360	74109502
no Peak	PHACTR2	uc003qjq.3	chr6	143929316	144152321
no Peak	PHF14	uc003srz.2	chr7	11013515	11209241
no Peak	PHF15	uc003kzn.2	chr5	133861372	133918918
no Peak	PHF17	uc003igk.2	chr4	129730778	129796378
no Peak	PHF20L1	uc003ytt.2	chr8	133787603	133861050
no Peak	PHF2	uc011lug.1	chr9	96338967	96439037
no Peak	PHF3	uc010kah.1	chr6	64345724	64419136
no Peak	PHKB	uc002eeu.3	chr16	47495209	47735433
no Peak	PHLPP2	uc002fay.1	chr16	71711376	71757715
no Peak	PHTF2	uc003ugq.3	chr7	77428108	77586818
no Peak	PI4KA	uc002zsz.3	chr22	21061980	21213070
no Peak	PIAS2	uc002lck.2	chr18	44392060	44497466
no Peak	PIGL	uc002gpv.2	chr17	16120508	16229572
no Peak	PIGN	uc002lii.3	chr18	59711459	59854289
no Peak	PIGU	uc010gev.1	chr20	33173240	33265089
no Peak	PIK3C2A	uc001mmr.3	chr11	17109845	17229530
no Peak	PIK3C3	uc002lap.2	chr18	39535198	39661444
no Peak	PIN1	uc002mmk.1	chr19	9945998	9959068
no Peak	PIP4K2A	uc001irl.3	chr10	22823766	23003503
no Peak	PIP5K1A	uc001exj.2	chr1	151171020	151222006
no Peak	PIP5K1C	uc002lyj.1	chr19	3630181	3700445
no Peak	PITPNB	uc003adk.2	chr22	28247657	28315255
no Peak	PITPNC1	uc002jgb.2	chr17	65373923	65689645
no Peak	PITPNM2	uc009zxu.1	chr12	123484852	123590046
no Peak	PKIA	uc003yba.2	chr8	79428335	79515484
no Peak	PKIB	uc003pyz.2	chr6	122793061	123047517
no Peak	PKN2	uc001dmn.2	chr1	89149921	89301937
no Peak	PKNOX1	uc002zcq.1	chr21	44394642	44453688
no Peak	PLA2G12A	uc003hzp.2	chr4	110631145	110651242
no Peak	PLAA	uc003zqd.2	chr9	26903368	26947468
no Peak	PLCB2	uc001zld.2	chr15	40580098	40600174
no Peak	PLCL1	uc002uuv.3	chr2	198669425	199014606
no Peak	PLDN	uc001zvq.2	chr15	45879416	45901908
no Peak	PLEKHA1	uc001lge.1	chr10	124134219	124191866
no Peak	PLEKHA3	uc002umn.2	chr2	179345198	179369780
no Peak	PLEKHB2	uc002tsh.2	chr2	131862419	132111282
no Peak	PLEKHM3	uc002vcl.2	chr2	208686011	208890284
no Peak	PLEKHO2	uc002anv.2	chr15	65134081	65160199
no Peak	PML	uc002awv.2	chr15	74287013	74340153
no Peak	PMM2	uc010uye.1	chr16	8891669	8900891
no Peak	PMPCA	uc004chl.2	chr9	139305115	139318212
no Peak	PMS1	uc002urh.3	chr2	190648810	190742354
no Peak	PMS2L3	uc003udp.2	chr7	75137069	75157453
no Peak	PNKD	uc002vhn.2	chr2	219135114	219211515
no Peak	POGZ	uc001eyg.1	chr1	151399443	151431932
no Peak	POLA1	uc004dbl.2	chrX	24712055	25015100
no Peak	POLD3	uc001ovf.1	chr11	74303628	74353765
no Peak	POLG2	uc002jei.2	chr17	62473903	62493169
no Peak	POLN	uc011bvi.1	chr4	2158120	2243860
no Peak	POLR1B	uc002thx.2	chr2	113299491	113334727
no Peak	POLR1D	uc010aam.2	chr13	28194894	28241547
no Peak	POLR2G	uc001nva.2	chr11	62529010	62534185
no Peak	POLR3K	uc002cfi.1	chr16	96999	103625
no Peak	POMT1	uc011mci.1	chr9	134378288	134385802
no Peak	POU2F1	uc001ged.2	chr1	167190142	167385317
no Peak	POU2F2	uc002oso.2	chr19	42592672	42636630
no Peak	PPA2	uc003hxq.2	chr4	106290234	106395227
no Peak	PPAT	uc003hbr.2	chr4	57259530	57301845
no Peak	PPFIBP2	uc001mfj.3	chr11	7535000	7674989
no Peak	PPIG	uc002ufc.1	chr2	170441156	170487497
no Peak	PPIL3	uc002uwk.2	chr2	201735679	201753999
no Peak	PPIL4	uc003qmo.1	chr6	149825630	149867171
no Peak	PPM1A	uc001xex.3	chr14	60715965	60755270
no Peak	PPM1B	uc002rtx.2	chr2	44395999	44471522
no Peak	PPM1D	uc010ddm.1	chr17	58677553	58742036
no Peak	PPP1R12A	uc001szc.2	chr12	80190974	80328978
no Peak	PPP1R2	uc003fuq.3	chr3	195255533	195270224
no Peak	PPP1R8	uc001bov.1	chr1	28157292	28178183
no Peak	PPP2CB	uc003xik.2	chr8	30643126	30670352
no Peak	PPP2R2A	uc003xek.2	chr8	25230074	26228645
no Peak	PPP2R5C	uc010txt.1	chr14	102276139	102372983
no Peak	PPP2R5E	uc001xgd.1	chr14	63841354	64010079
no Peak	PPP3CB	uc001juf.2	chr10	75196563	75255782
no Peak	PPP3CC	uc003xbr.1	chr8	22298595	22380326
no Peak	PPP4R1	uc002kod.1	chr18	9546791	9614600
no Peak	PPP5C	uc010xya.1	chr19	46850293	46894103
no Peak	PPTC7	uc001trh.1	chr12	110972236	111021064
no Peak	PQLC1	uc002lnl.2	chr18	77662419	77711653
no Peak	PRAGMIN	uc003wsh.3	chr8	8175258	8239257
no Peak	PRC1	uc002bqm.2	chr15	91509273	91537804
no Peak	PRDM10	uc001qfm.2	chr11	129769601	129872730
no Peak	PRDM11	uc001myo.2	chr11	45115563	45246902
no Peak	PRDM15	uc002yzp.2	chr21	43218386	43299591
no Peak	PRDM8	uc010ijo.2	chr4	81105438	81125480
no Peak	PREP	uc003prc.2	chr6	105725506	105850969
no Peak	PRIM2	uc003pdx.2	chr6	57182421	57513375
no Peak	PRKAR2A	uc010hki.1	chr3	48785217	48885270
no Peak	PRKCA	uc002jfp.1	chr17	64298925	64806862
no Peak	PRKCB	uc002dmd.2	chr16	23847299	24231930
no Peak	PRKDC	uc003xqi.2	chr8	48685669	48872743
no Peak	PRKRIR	uc001oxh.1	chr11	76061003	76091880
no Peak	PRKX	uc004fre.2	chrY	7142012	7249586
no Peak	PRMT2	uc002zjx.2	chr21	48055526	48084862
no Peak	PROSC	uc003xkh.2	chr8	37620100	37637285
no Peak	PRPF19	uc001nqf.2	chr11	60658020	60674061
no Peak	PRPF3	uc001eum.3	chr1	150293927	150325703
no Peak	PRPF40A	uc010zcd.1	chr2	153514402	153573975
no Peak	PRR11	uc002ixg.1	chr17	57233092	57280885
no Peak	PRR12	uc002poo.3	chr19	50094911	50129695
no Peak	PRR5L	uc001mwo.3	chr11	36317724	36486753
no Peak	PRRC1	uc003kuk.2	chr5	126853308	126890778
no Peak	PSEN1	uc001xnv.2	chr14	73603142	73690398
no Peak	PSMB1	uc003qxq.2	chr6	170780106	170862417
no Peak	PSMB2	uc001bzf.1	chr1	36067743	36107143
no Peak	PSMB9	uc003sga.2	chr6	32821937	32827626
no Peak	PSMD10	uc004enq.1	chrX	107327436	107334848
no Peak	PSMD11	uc002hhm.2	chr17	30771501	30808041
no Peak	PSMD1	uc002vrn.1	chr2	231921608	232037473
no Peak	PSMD2	uc003fnn.1	chr3	184017021	184026840
no Peak	PSMF1	uc002wel.3	chr20	1093905	1148424
no Peak	PSTPIP1	uc010bkv.1	chr15	77287745	77321915
no Peak	PTCH1	uc010mrr.2	chr9	98205265	98279247
no Peak	PTEN	uc001kfb.2	chr10	89623194	89728531
no Peak	PTGER2	uc001wzr.2	chr14	52781015	52795320
no Peak	PTPN11	uc001ttx.2	chr12	112856535	112947716
no Peak	PTPN22	uc001edu.2	chr1	114375568	114414375
no Peak	PTPN4	uc002tmf.1	chr2	120517206	120735037
no Peak	PTPN9	uc002bal.2	chr15	75759462	75871625
no Peak	PTPRA	uc010zqc.1	chr20	2854141	2985792
no Peak	PTPRC	uc010ppg.1	chr1	198608136	198704381
no Peak	PTPRJ	uc001ngp.3	chr11	48002109	48192393
no Peak	PWP1	uc001tmo.1	chr12	108079589	108106257
no Peak	PWWP2A	uc003lxv.3	chr5	159502893	159546452
no Peak	PYHIN1	uc001ftb.2	chr1	158901341	158946841
no Peak	QKI	uc003quf.2	chr6	163835674	163991169
no Peak	QRSL1	uc003prm.2	chr6	107077440	107116290
no Peak	QSER1	uc001mty.2	chr11	32914791	33001812
no Peak	QTRTD1	uc003eay.2	chr3	113775610	113807266
no Peak	R3HDM1	uc002tuo.2	chr2	136289082	136482836
no Peak	RAB10	uc002rgv.2	chr2	26256728	26360322
no Peak	RAB11A	uc002apk.2	chr15	66161795	66181791
no Peak	RAB11FIP2	uc009xyz.1	chr10	119764428	119806114
no Peak	RAB11FIP4	uc002hgn.1	chr17	29718641	29865232
no Peak	RAB12	uc002knp.2	chr18	8609442	8639379
no Peak	RAB22A	uc002xyz.2	chr20	56884770	56942560
no Peak	RAB27A	uc002acr.2	chr15	55495801	55582001
no Peak	RAB33A	uc010nre.2	chrX	129305772	129318843
no Peak	RAB33B	uc003ihv.2	chr4	140374960	140397063
no Peak	RAB39B	uc004fne.2	chrX	154487526	154493852
no Peak	RAB3GAP1	uc010fnf.2	chr2	135809852	135927544
no Peak	RAB3IP	uc001svm.2	chr12	70132630	70216982
no Peak	RAB6A	uc001oue.2	chr11	73386689	73472201
no Peak	RACGAP1	uc001rvt.2	chr12	50382944	50419307
no Peak	RAD23B	uc011lwa.1	chr9	110045543	110087594
no Peak	RAD51C	uc002iwu.2	chr17	56769962	56811690
no Peak	RAD51L1	uc001xkg.1	chr14	68286508	69196935
no Peak	RALBP1	uc002kob.2	chr18	9475006	9538105
no Peak	RALB	uc010yys.1	chr2	120997639	121052283
no Peak	RAP1GAP2	uc010ckd.2	chr17	2699731	2941034
no Peak	RAP1GDS1	uc003htu.2	chr4	99182526	99313396
no Peak	RAP2B	uc003ezr.2	chr3	152880028	152886261
no Peak	RAPGEF6	uc003kvp.1	chr5	130761603	131132756
no Peak	RBBP5	uc001hbu.1	chr1	205055978	205091131
no Peak	RBBP6	uc002dmh.2	chr16	24550907	24584181
no Peak	RBL1	uc010zvt.1	chr20	35625071	35724410
no Peak	RBM12B	uc003yfz.2	chr8	94743732	94753224
no Peak	RBM25	uc001xnn.3	chr14	73525220	73567881
no Peak	RBM26	uc001vkz.2	chr13	79894099	79979923
no Peak	RBM33	uc011kvv.1	chr7	155493466	155559477
no Peak	RCBTB2	uc001vcj.2	chr13	49063100	49110118
no Peak	RCOR1	uc001ymb.2	chr14	103059232	103196912
no Peak	RCSD1	uc001gem.2	chr1	167599473	167675485
no Peak	RDX	uc009yxx.1	chr11	110045604	110167437
no Peak	RECK	uc003zyw.2	chr9	36036909	36124451
no Peak	REEP3	uc001jmt.2	chr10	65281122	65381971
no Peak	REST	uc003hch.2	chr4	57774041	57798339
no Peak	RFWD2	uc001gku.1	chr1	175913966	176176370
no Peak	RFWD3	uc010cgq.2	chr16	74655297	74700779
no Peak	RFX1	uc010dzi.2	chr19	14080451	14117134
no Peak	RFX3	uc003zhr.2	chr9	3224648	3525983
no Peak	RFX7	uc010bfn.2	chr15	56382731	56535483
no Peak	RGMB	uc003knc.2	chr5	98104998	98132196
no Peak	RGS3	uc004bhq.2	chr9	116207010	116360017
no Peak	RHBDD1	uc010fxc.2	chr2	227700772	227861591
no Peak	RHOT1	uc002hgw.2	chr17	30469472	30552745
no Peak	RIC8B	uc001tlz.2	chr12	107168398	107283092
no Peak	RIN3	uc001yar.1	chr14	93117926	93127767
no Peak	RIOK2	uc003kmz.2	chr5	96496571	96519005
no Peak	RLIM	uc004ebu.2	chrX	73802812	73834461
no Peak	RMI1	uc004anr.3	chr9	86595636	86618982
no Peak	RMND5A	uc002srs.3	chr2	86947413	88038766
no Peak	RNASEH2B	uc001vfa.3	chr13	51483891	51530900
no Peak	RNASEL	uc009wxz.1	chr1	182542771	182558391
no Peak	RNASEN	uc003jhh.2	chr5	31400601	31532282
no Peak	RNF144A	uc002qys.2	chr2	7057522	7184307
no Peak	RNF144B	uc003ncs.2	chr6	18387593	18468848
no Peak	RNF149	uc002taz.1	chr2	101892552	101925152
no Peak	RNF19B	uc010oho.1	chr1	33402051	33430286
no Peak	RNF20	uc004bbn.2	chr9	104296132	104325625
no Peak	RNF41	uc010sqg.1	chr12	56598285	56615735
no Peak	ROCK1	uc002kte.2	chr18	18529704	18691812
no Peak	ROCK2	uc002rbd.1	chr2	11321777	11484711
no Peak	RP2	uc004dgw.3	chrX	46696346	46741789
no Peak	RP9	uc003tdm.2	chr7	33134411	33149002
no Peak	RPA1	uc002fto.2	chr17	1733272	1802848
no Peak	RPA3	uc003sri.2	chr7	7676576	7758238
no Peak	RPAP2	uc009wdh.2	chr1	92764521	92853732
no Peak	RPAP3	uc001rpr.2	chr12	48055715	48099844
no Peak	RPL28	uc002qkw.1	chr19	55897717	55903455
no Peak	RPN2	uc002xgq.2	chr20	35807455	35870023
no Peak	RPRD1A	uc002kze.1	chr18	33569786	33647373
no Peak	RPS27L	uc002aly.2	chr15	63445539	63449741
no Peak	RPS6KA1	uc001bmr.1	chr1	26856248	26901520
no Peak	RPS6KA3	uc011mjl.1	chrX	20168029	20285523
no Peak	RPS6KA5	uc001xys.2	chr14	91337166	91526993
no Peak	RPUSD2	uc001zmd.1	chr15	40861536	40866661
no Peak	RRAGC	uc001ccr.2	chr1	39305014	39340166
no Peak	RRAS2	uc010rco.1	chr11	14299466	14380729
no Peak	RRM1	uc009yei.2	chr11	4115923	4160105
no Peak	RRM2B	uc003ykn.2	chr8	103216731	103251346
no Peak	RRM2	uc002rah.2	chr2	10262734	10271548
no Peak	RRP8	uc001med.2	chr11	6621153	6624811
no Peak	RSBN1L	uc010ldt.1	chr7	77325742	77409120
no Peak	RSF1	uc001oyn.2	chr11	77377274	77531880
no Peak	RSPRY1	uc002elb.2	chr16	57220240	57272940
no Peak	RSU1	uc001iol.2	chr10	16632618	16859453
no Peak	RTCD1	uc001dtd.2	chr1	100731713	100758323
no Peak	RTKN2	uc009xpf.1	chr10	63942793	63996022
no Peak	RUFY2	uc001joc.2	chr10	70136950	70167051
no Peak	RUFY3	uc003hfp.3	chr4	71570653	71655613
no Peak	RUNDC1	uc002ici.1	chr17	41132581	41145707
no Peak	RUNX1	uc002yum.1	chr21	36169709	36421255
no Peak	RUNX2	uc011dvx.1	chr6	45296053	45518818
no Peak	RYK	uc003eqc.1	chr3	133875977	133969586
no Peak	SAFB2	uc010xio.1	chr19	5611886	5622938
no Peak	SAFB	uc010xiq.1	chr19	5623163	5648303
no Peak	SAMD12	uc010mdb.1	chr8	119201694	119634234
no Peak	SAMD3	uc003qbx.2	chr6	130465462	130686570
no Peak	SAMD8	uc001jwx.1	chr10	76871392	76936607
no Peak	SAP130	uc010fmd.2	chr2	128698790	128784869
no Peak	SARS	uc001dwt.1	chr1	109756539	109778831
no Peak	SART1	uc010rot.1	chr11	65729159	65734854
no Peak	SART3	uc001tna.1	chr12	108923918	108955165
no Peak	SBDSP	uc003twg.2	chr7	72299951	72307976
no Peak	SBDS	uc003tvm.1	chr7	66452689	66460588
no Peak	SBK1	uc002dpd.2	chr16	28303839	28335162
no Peak	SC4MOL	uc003ire.2	chr4	166248817	166264224
no Peak	SCAMP4	uc002lui.1	chr19	1905372	1920327
no Peak	SCAPER	uc002bbz.1	chr15	76672049	77197744
no Peak	SCLT1	uc003igp.2	chr4	129805151	130014764
no Peak	SCO1	uc002gmr.3	chr17	10583650	10600885
no Peak	SCOC	uc003iib.2	chr4	141178439	141303710
no Peak	SCP2	uc001cus.1	chr1	53392947	53517282
no Peak	SCYL2	uc001thn.2	chr12	100661548	100733912
no Peak	SDAD1	uc003hje.3	chr4	76871068	76912113
no Peak	SDCCAG1	uc010anj.1	chr14	50033026	50319539
no Peak	SDF2	uc010crs.1	chr17	26987505	26988933
no Peak	SDHA	uc003jao.3	chr5	218355	256812
no Peak	SEC11C	uc002lht.2	chr18	56807124	56826061
no Peak	SEC22A	uc003ege.2	chr3	122920773	122992980
no Peak	SEC22C	uc003clj.2	chr3	42594393	42623428
no Peak	SEC24A	uc003kzs.2	chr5	133984478	134063600
no Peak	SEC24B	uc011cfp.1	chr4	110354970	110461614
no Peak	SEC31A	uc003hnm.2	chr4	83739814	83821700
no Peak	SEC62	uc003fgg.2	chr3	169684579	169711618
no Peak	SECISBP2L	uc001zxe.1	chr15	49280966	49338630
no Peak	SEL1L	uc001xvo.3	chr14	81965155	82000205
no Peak	SENP1	uc009zkx.2	chr12	48436757	48500091
no Peak	SEPHS1	uc009xje.2	chr10	13370879	13390280
no Peak	SEPT9	uc002jts.3	chr17	75277491	75496676
no Peak	SERINC5	uc003kgk.2	chr5	79407473	79551870
no Peak	SERTAD2	uc002sde.1	chr2	64858755	64881046
no Peak	SESN1	uc003psu.2	chr6	109307646	109415277
no Peak	SESTD1	uc002uni.3	chr2	179966420	180129350
no Peak	SETD3	uc001ygd.2	chr14	99876141	99947226
no Peak	SETD8	uc001uew.2	chr12	123868703	123893898
no Peak	SETDB2	uc010adh.2	chr13	50018428	50062766
no Peak	SF3B3	uc002ezf.2	chr16	70557690	70611570
no Peak	SFMBT1	uc003dgg.2	chr3	52938627	53080070
no Peak	SFMBT2	uc001ijn.1	chr10	7204248	7453450
no Peak	SFRS12	uc003juo.2	chr5	65440662	65476712
no Peak	SFRS18	uc003ppr.2	chr6	99855956	99873207
no Peak	SFRS8	uc001ujb.1	chr12	132195644	132262875
no Peak	SFXN1	uc003mda.2	chr5	174905513	174955621
no Peak	SGK196	uc003xpw.2	chr8	42948656	42978323
no Peak	SGK3	uc003xwp.2	chr8	67579850	67774255
no Peak	SGPP1	uc001xgj.2	chr14	64150936	64194756
no Peak	SGTA	uc002lwi.1	chr19	2754711	2783354
no Peak	SH2D3C	uc004bsc.2	chr9	130500596	130541048
no Peak	SH3BGRL	uc011mqs.1	chrX	80457302	80554042
no Peak	SH3BP2	uc010icn.2	chr4	2794749	2826923
no Peak	SH3RF3	uc010ywt.1	chr2	109745996	110262207
no Peak	SHOC2	uc009xxx.2	chr10	112679300	112773424
no Peak	SIAH1	uc002efo.1	chr16	48394445	48419229
no Peak	SIDT1	uc003eak.2	chr3	113251217	113348421
no Peak	SIL1	uc003ldo.2	chr5	138282411	138534065
no Peak	SIRPG	uc002wfm.1	chr20	1609797	1638425
no Peak	SKA3	uc001unt.2	chr13	21727734	21750710
no Peak	SKAP1	uc010dbe.1	chr17	46214299	46507594
no Peak	SLAIN2	uc003gya.3	chr4	48343612	48428213
no Peak	SLAMF1	uc001fwl.3	chr1	160579891	160617081
no Peak	SLAMF6	uc001fwd.1	chr1	160454819	160493042
no Peak	SLC11A2	uc001rxd.3	chr12	51373318	51420199
no Peak	SLC12A2	uc003kus.2	chr5	127419482	127525379
no Peak	SLC16A10	uc003pus.2	chr6	111408780	111544604
no Peak	SLC16A1	uc001ecy.2	chr1	113454471	113498975
no Peak	SLC16A7	uc001sqs.2	chr12	59989847	60175407
no Peak	SLC1A5	uc002pfs.2	chr19	47278141	47291842
no Peak	SLC20A2	uc003xpe.2	chr8	42273994	42397068
no Peak	SLC23A2	uc002wlh.1	chr20	4833001	4990939
no Peak	SLC25A17	uc010gyg.2	chr22	41165640	41215392
no Peak	SLC25A20	uc011bbw.1	chr3	48894356	48936402
no Peak	SLC25A33	uc001apx.2	chr1	9599527	9642830
no Peak	SLC25A36	uc003etq.2	chr3	140660661	140698785
no Peak	SLC30A7	uc001dtn.2	chr1	101361631	101447311
no Peak	SLC30A9	uc011byx.1	chr4	41992522	42089550
no Peak	SLC33A1	uc003fan.3	chr3	155544315	155572167
no Peak	SLC35A3	uc001dsq.1	chr1	100435539	100489006
no Peak	SLC38A10	uc002kab.2	chr17	79224672	79269096
no Peak	SLC39A8	uc011ceo.1	chr4	103172197	103266410
no Peak	SLC39A9	uc001xlg.3	chr14	69865406	69929105
no Peak	SLC9A9	uc003evn.2	chr3	142984064	143567346
no Peak	SLCO3A1	uc002bqx.2	chr15	92396937	92709137
no Peak	SLFN11	uc010ctp.2	chr17	33677330	33700720
no Peak	SLFN12L	uc002hjn.2	chr17	33801925	33864880
no Peak	SLFN12	uc002hjj.3	chr17	33738082	33760173
no Peak	SLFN5	uc002hjf.3	chr17	33570085	33594754
no Peak	SMAD2	uc002lcz.2	chr18	45359466	45457515
no Peak	SMARCA4	uc010dxo.2	chr19	11071597	11172959
no Peak	SMARCAD1	uc003htb.3	chr4	95128758	95212441
no Peak	SMARCC1	uc011bbd.1	chr3	47627377	47823596
no Peak	SMARCE1	uc002hva.2	chr17	38796826	38804103
no Peak	SMC1A	uc011moe.1	chrX	53401071	53449618
no Peak	SMC6	uc010exo.2	chr2	17845079	17981462
no Peak	SMCR7L	uc003axw.2	chr22	39896104	39911712
no Peak	SMCR7	uc002gsu.2	chr17	18163847	18169093
no Peak	SMEK2	uc002rzc.2	chr2	55775514	55845113
no Peak	SMG6	uc002fud.1	chr17	2202199	2206813
no Peak	SMS	uc004dag.2	chrX	21958841	22012954
no Peak	SNAP23	uc001zpz.1	chr15	42787834	42825256
no Peak	SNAP47	uc001hra.2	chr1	227916239	227968932
no Peak	SNAPC1	uc001xft.2	chr14	62229074	62263145
no Peak	SNIP1	uc001cbi.2	chr1	38002144	38019903
no Peak	SNRNP27	uc002sfw.2	chr2	70121089	70132348
no Peak	SNRPD1	uc002ktj.1	chr18	19192259	19210208
no Peak	SNTB1	uc010mdg.2	chr8	121547985	121824309
no Peak	SNX12	uc004dyp.1	chrX	70209363	70288231
no Peak	SNX13	uc010kuc.2	chr7	17830385	17980131
no Peak	SNX14	uc003pkr.2	chr6	86215216	86303629
no Peak	SNX18	uc011cqg.1	chr5	53813588	53842415
no Peak	SNX19	uc001qgk.3	chr11	130745766	130786382
no Peak	SNX1	uc010uio.1	chr15	64388176	64432074
no Peak	SNX20	uc010vgp.1	chr16	50700210	50715264
no Peak	SNX29	uc002dby.3	chr16	12146054	12668145
no Peak	SNX4	uc003eib.2	chr3	125165494	125239058
no Peak	SNX5	uc010zrt.1	chr20	17927811	17949154
no Peak	SNX6	uc010tpm.1	chr14	35030617	35099366
no Peak	SOAT1	uc001gml.2	chr1	179263016	179324452
no Peak	SOCS5	uc002rvf.2	chr2	46926098	46989926
no Peak	SOCS6	uc002lkr.1	chr18	67956136	67997434
no Peak	SOLH	uc002chi.2	chr16	577855	604634
no Peak	SORL1	uc001pxx.2	chr11	121322960	121504471
no Peak	SOS1	uc002rrk.3	chr2	39208691	39347604
no Peak	SOX7	uc011kwz.1	chr8	10581278	10697299
no Peak	SP100	uc002vqu.1	chr2	231280870	231410317
no Peak	SP110	uc002vqg.3	chr2	231033644	231084827
no Peak	SP140L	uc010fxm.1	chr2	231191893	231268445
no Peak	SP4	uc003sva.2	chr7	21467688	21554149
no Peak	SPAST	uc002roc.2	chr2	32288679	32382705
no Peak	SPATA5L1	uc001zvf.2	chr15	45694518	45713614
no Peak	SPATA5	uc003iez.3	chr4	123844224	124240602
no Peak	SPC24	uc002mql.2	chr19	11257830	11266484
no Peak	SPEF2	uc003jjp.1	chr5	35691138	35808142
no Peak	SPG20	uc001uvq.2	chr13	36875776	36944317
no Peak	SPOP	uc002ipb.2	chr17	47676247	47755525
no Peak	SPPL2A	uc001zyv.2	chr15	50999738	51057910
no Peak	SPPL2B	uc002lvr.2	chr19	2328628	2355099
no Peak	SPTBN1	uc002rxu.2	chr2	54683453	54898582
no Peak	SPTLC1	uc011ltv.1	chr9	94793419	94877690
no Peak	SPTLC2	uc001xub.2	chr14	77973271	78083110
no Peak	SQRDL	uc001zvv.2	chr15	45927255	45983478
no Peak	SRBD1	uc002rus.2	chr2	45615819	45838433
no Peak	SRD5A1	uc011cml.1	chr5	6633499	6669673
no Peak	SRFBP1	uc003kst.1	chr5	121297655	121364295
no Peak	SRP54	uc001wso.2	chr14	35452103	35498771
no Peak	SRP68	uc002jqk.1	chr17	74035190	74068607
no Peak	SRPK1	uc003olj.2	chr6	35800811	35888956
no Peak	SRPK2	uc003vcw.1	chr7	104773450	105039798
no Peak	SSH2	uc002hep.1	chr17	27974711	28257018
no Peak	SSR1	uc003mxf.3	chr6	7281289	7313541
no Peak	ST13	uc003aze.2	chr22	41220602	41252687
no Peak	ST6GAL1	uc003frb.2	chr3	186648515	186796339
no Peak	ST8SIA1	uc001rfo.3	chr12	22346325	22487648
no Peak	ST8SIA4	uc003knk.2	chr5	100142639	100238987
no Peak	STAM2	uc002tyc.3	chr2	152973315	153032506
no Peak	STAM	uc001ipj.1	chr10	17686123	17757907
no Peak	STARD7	uc002svm.3	chr2	96850604	96874573
no Peak	STAT1	uc010fsf.1	chr2	191845345	191878976
no Peak	STAT2	uc010sqn.1	chr12	56742707	56753909
no Peak	STAT5B	uc002hzh.2	chr17	40351195	40428424
no Peak	STK10	uc003mbo.1	chr5	171469073	171615346
no Peak	STK35	uc002wfw.3	chr20	2083413	2129196
no Peak	STOM	uc011lyk.1	chr9	124101353	124132545
no Peak	STRN	uc002rpn.2	chr2	37075472	37193615
no Peak	STT3A	uc009zbm.2	chr11	125462738	125479793
no Peak	STX11	uc003qks.3	chr6	144471653	144513075
no Peak	STX12	uc001bou.3	chr1	28099693	28150962
no Peak	STX16	uc010zzq.1	chr20	57226308	57254580
no Peak	STX2	uc001uio.2	chr12	131274148	131323811
no Peak	STX8	uc002glx.2	chr17	9153788	9479275
no Peak	SUCLA2	uc010tgd.1	chr13	48516791	48612125
no Peak	SUCLG1	uc002son.2	chr2	84650653	84686586
no Peak	SUGT1P	uc010mjq.1	chr9	33219069	33511047
no Peak	SUGT1	uc001vhc.2	chr13	53226830	53262433
no Peak	SUMO1	uc002uyz.1	chr2	203070902	203103322
no Peak	SUPT16H	uc001wap.2	chr14	21840233	21852425
no Peak	SUPT3H	uc003oxn.1	chr6	44777053	45345670
no Peak	SUSD1	uc010mui.2	chr9	114803061	114937556
no Peak	SUV420H1	uc009ysf.2	chr11	67923506	67981068
no Peak	SUZ12P	uc002hfo.2	chr17	29035713	29097067
no Peak	TADA1	uc009wve.2	chr1	166831952	166845654
no Peak	TADA3	uc010hcn.1	chr3	9821653	9834695
no Peak	TAF12	uc009vti.2	chr1	28931450	28969604
no Peak	TAF1C	uc010vob.1	chr16	84214933	84220662
no Peak	TAF2	uc003you.2	chr8	120743014	120845074
no Peak	TAF3	uc010qbd.1	chr10	7860672	8056713
no Peak	TAF4	uc002ybs.2	chr20	60549854	60640866
no Peak	TAF5L	uc001htq.2	chr1	229728867	229761794
no Peak	TAF8	uc003oru.1	chr6	42018250	42055199
no Peak	TAF9	uc003jwb.2	chr5	68647554	68665840
no Peak	TANK	uc002ubq.1	chr2	161993465	162061490
no Peak	TARBP1	uc001hwd.2	chr1	234527059	234614849
no Peak	TBC1D19	uc003gsf.3	chr4	26585545	26756915
no Peak	TBC1D1	uc011byd.1	chr4	37892719	38140793
no Peak	TBC1D22A	uc010haf.2	chr22	47158548	47569722
no Peak	TBC1D22B	uc003onn.2	chr6	37225547	37300745
no Peak	TBC1D23	uc003dtt.2	chr3	99979685	100044078
no Peak	TBC1D4	uc001vjl.1	chr13	75858808	76056250
no Peak	TBCA	uc003kfh.1	chr5	76986994	77072185
no Peak	TBCC	uc003osl.2	chr6	42712234	42713884
no Peak	TBCEL	uc009zay.2	chr11	120894802	120960352
no Peak	TBCK	uc003hyf.2	chr4	106967232	107237861
no Peak	TBK1	uc001ssc.1	chr12	64845936	64895891
no Peak	TBL1XR1	uc003fiy.2	chr3	176769291	176915048
no Peak	TBL1X	uc010ndq.2	chrX	9431334	9687779
no Peak	TBX19	uc001gfj.3	chr1	168195254	168283662
no Peak	TBX21	uc002ilv.1	chr17	45810609	45823485
no Peak	TC2N	uc001xzv.3	chr14	92246268	92333880
no Peak	TCEA1	uc003xru.2	chr8	54879116	54935008
no Peak	TCEANC	uc010nef.1	chrX	13671224	13682247
no Peak	TCEB1	uc003yaa.1	chr8	74858633	74884522
no Peak	TCERG1	uc011dbt.1	chr5	145826872	145859778
no Peak	TCF12	uc010ugm.1	chr15	57210322	57579190
no Peak	TCF20	uc003bcj.1	chr22	42556018	42611445
no Peak	TCIRG1	uc001onf.1	chr11	67807258	67811120
no Peak	TCP11L2	uc001tln.2	chr12	106696580	106740790
no Peak	TDP1	uc010atm.2	chr14	90421282	90511106
no Peak	TDRD3	uc001via.2	chr13	60970590	61148012
no Peak	TET2	uc003hxk.2	chr4	106067942	106200958
no Peak	TFAP4	uc010uxg.1	chr16	4307187	4323001
no Peak	TFCP2	uc001rxv.1	chr12	51488607	51566664
no Peak	TFDP1	uc010tkd.1	chr13	114239002	114295786
no Peak	TFRC	uc003fwa.3	chr3	195776155	195809032
no Peak	TGDS	uc001vlw.2	chr13	95226308	95248511
no Peak	TGS1	uc003xsj.3	chr8	56685790	56738003
no Peak	TG	uc003ytw.2	chr8	133879204	134147141
no Peak	THAP1	uc003xpk.2	chr8	42691817	42698474
no Peak	THAP4	uc002wbt.2	chr2	242523820	242576655
no Peak	THAP5	uc003vfm.2	chr7	108202672	108210167
no Peak	THOC2	uc004etu.2	chrX	122734412	122866904
no Peak	THUMPD2	uc002rrv.2	chr2	39963199	40006416
no Peak	TIA1	uc002sgj.3	chr2	70436576	70475779
no Peak	TIAL1	uc001lek.1	chr10	121332977	121356541
no Peak	TIAM1	uc002yow.1	chr21	32490735	32931290
no Peak	TIMM17A	uc001gxc.2	chr1	201924618	201939787
no Peak	TIPRL	uc001gfg.2	chr1	168148170	168171349
no Peak	TM2D1	uc001czz.1	chr1	62146718	62191095
no Peak	TM2D3	uc010usg.1	chr15	102173179	102192594
[truncated: 334 more rows]

## Sheet: HumanMCF7
Peak Group	GeneSymbol	transcriptId	chrom	lxStart	lxEnd
RNAP II total	DNAJB13	uc001ouo.2	chr11	73661363	73681331
RNAP II total	ZNF341	uc002wzx.2	chr20	32319807	32380076
RNAP II total	RHOB	uc002rdv.2	chr2	20646834	20649200
RNAP II total	CHD2	uc002bsp.2	chr15	93443550	93571236
RNAP II total	FAM53B	uc001lhu.1	chr10	126305648	126478907
RNAP II total	TRMT61A	uc001yng.2	chr14	103995508	104003408
RNAP II total	CANT1	uc002jwm.1	chr17	76988903	76991331
RNAP II total	LMNA	uc001fni.2	chr1	156084460	156109878
RNAP II total	TRIM7	uc003mmw.1	chr5	180620923	180631340
RNAP II total	FGFR4	uc003mfl.2	chr5	176513920	176525124
RNAP II total	CCNG2	uc003hkn.3	chr4	78078362	78091210
RNAP II total	CDKN1A	uc011dtq.1	chr6	36645587	36655108
RNAP II total	TAT	uc002fap.2	chr16	71600753	71610998
RNAP II total	SLC39A6	uc010dmy.2	chr18	33688494	33709357
RNAP II total	C17orf82	uc002izh.1	chr17	59489111	59490641
RNAP II total	ATN1	uc001qry.1	chr12	7043002	7045891
RNAP II total	RHEB	uc003wkh.1	chr7	151163097	151217010
RNAP II total	TRIB3	uc002wdn.2	chr20	361940	378201
RNAP II total	NBEAL2	uc003cqq.1	chr3	47029484	47037123
RNAP II total	NAP1L4	uc001lxc.2	chr11	2965660	3013607
RNAP II total	DYNC1H1	uc001yks.2	chr14	102430864	102517135
RNAP II total	GINS2	uc002fjb.2	chr16	85714730	85722588
RNAP II total	SLC25A4	uc003ixd.2	chr4	186064397	186068424
RNAP II total	RPS9	uc002qed.1	chr19	54705027	54711519
RNAP II total	PLXNA1	uc003ejg.2	chr3	126707501	126756228
RNAP II total	SRC	uc002xgx.2	chr20	35973087	36033819
RNAP II total	TMEM134	uc001olp.1	chr11	67231818	67236731
RNAP II total	FAM100A	uc002cwx.2	chr16	4658883	4664927
RNAP II total	CXCR7	uc010fyq.2	chr2	237469423	237490992
RNAP II total	CLU	uc003xfx.1	chr8	27454450	27468938
RNAP II total	PRR14	uc002dzb.1	chr16	30665429	30666535
RNAP II total	TIMM17B	uc004dla.1	chrX	48750731	48755104
RNAP II total	SFXN3	uc001ksp.2	chr10	102790995	102800997
RNAP II total	LOC221122	uc001myn.2	chr11	44995452	44999576
RNAP II total	AKT2	uc002onf.2	chr19	40736224	40791265
RNAP II total	EP400NL	uc001ujw.1	chr12	132589111	132600084
RNAP II total	RPS15	uc002lsp.1	chr19	1438362	1440492
RNAP II total	P4HB	uc002kbm.1	chr17	79801033	79818442
RNAP II total	EDN1	uc003nae.3	chr6	12290528	12297426
RNAP II total	TGIF1	uc002klu.2	chr18	3412071	3458404
RNAP II total	NFE2L2	uc002uli.3	chr2	178095033	178257419
RNAP II total	PNN	uc001wuw.3	chr14	39644386	39652421
RNAP II total	PDLIM7	uc003mhg.1	chr5	176916771	176924602
RNAP II total	ARF3	uc001rsr.2	chr12	49329991	49351252
RNAP II total	HNRNPA1	uc001sfl.2	chr12	54674487	54679028
RNAP II total	RPS5	uc002qsn.2	chr19	58898635	58906170
RNAP II total	STARD7	uc002svm.3	chr2	96850604	96874573
RNAP II total	DDX5	uc002jel.1	chr17	62498392	62499466
RNAP II total	RPS7	uc002qxw.2	chr2	3622852	3628508
RNAP II total	USP22	uc002gym.3	chr17	20902907	20946352
RNAP II total	RPL37	uc003jme.1	chr5	40831429	40835387
RNAP II total	EEF2	uc002lze.2	chr19	3976054	3985461
RNAP II total	TOMM20	uc001hwl.2	chr1	235272659	235292256
RNAP II total	UBE2L3	uc002zuz.1	chr22	21921956	21978323
RNAP II total	PTP4A1	uc003pek.2	chr6	64231650	64293488
RNAP II total	RPLP1	uc002asd.1	chr15	69745158	69747884
RNAP II total	PTMA	uc002vsb.3	chr2	232573234	232578248
RNAP II total	ATF4	uc003axz.2	chr22	39916568	39918690
RNAP II total	GNAS	uc002xzu.3	chr20	57416688	57475463
RNAP II total	ODC1	uc010exg.1	chr2	10580507	10587906
RNAP II total	MCL1	uc010pch.1	chr1	150547036	150552086
RNAP II total	HSPD1	uc002uui.2	chr2	198351309	198364640
RNAP II total	SCD	uc001kqy.2	chr10	102106771	102124587
RNAP II total	S100A10	uc001ezl.2	chr1	151955386	151966714
RNAP II total	HLA-E	uc003nqg.2	chr6	30457270	30461085
RNAP II total	SLC3A2	uc001nwb.2	chr11	62623517	62656352
RNAP II total	HMGN1	uc002yxp.2	chr21	40714246	40721047
RNAP II total	MLF2	uc001qqp.2	chr12	6857159	6862636
RNAP II total	RPS20	uc003xsn.2	chr8	56985367	56987140
RNAP II total	JUP	uc002hxr.2	chr17	39910858	39942964
RNAP II total	DSTN	uc002wpq.2	chr20	17550598	17588651
RNAP II total	ITGB5	uc003eho.2	chr3	124481795	124606144
RNAP II total	HNRNPH2	uc004ehm.2	chrX	100663190	100669115
RNAP II total	ENO1	uc001apj.1	chr1	8921062	8938780
RNAP II total	SLC2A1	uc001cik.2	chr1	43391045	43424847
RNAP II total	PKM2	uc002atz.1	chr15	72494794	72523684
RNAP II total	RPS16	uc002olk.2	chr19	39923848	39926618
RNAP II total	PPIA	uc003tlx.2	chr7	44836240	44842715
RNAP II total	EIF4A3	uc010wuc.1	chr17	78109018	78120851
RNAP II total	GRHPR	uc010mlv.1	chr9	37422680	37431144
RNAP II total	ZFP36L2	uc002rsv.3	chr2	43449541	43453745
RNAP II total	JUN	uc001cze.2	chr1	59246463	59249785
RNAP II total	ELF3	uc001gxi.3	chr1	201979689	201986306
RNAP II total	ID2	uc010yiu.1	chr2	8819339	8824581
RNAP II total	KRT18	uc001sbe.2	chr12	53342654	53346684
RNAP II total	CNN2	uc002lqt.1	chr19	1026297	1036687
RNAP II total	EGR1	uc003ldb.1	chr5	137801180	137805004
RNAP II total	PSMD7	uc010vmr.1	chr16	74330680	74340184
RNAP II total	ACIN1	uc010tnj.1	chr14	23548755	23564823
RNAP II total	TBCB	uc002odg.1	chr19	36605887	36616849
RNAP II total	RRM2	uc002rah.2	chr2	10262734	10271548
RNAP II total	CHMP1A	uc002fnu.2	chr16	89710845	89724129
RNAP II total	PPP5C	uc010xyb.1	chr19	46886412	46891705
RNAP II total	RPL38	uc002jjy.1	chr17	72199794	72202422
RNAP II total	SDC4	uc002xnu.2	chr20	43953930	43977064
RNAP II total	MCM2	uc003ejp.2	chr3	127317252	127341274
RNAP II total	EP300	uc003azl.3	chr22	41488613	41576080
RNAP II total	TRIB1	uc003yrx.2	chr8	126442562	126450642
RNAP II total	G6PD	uc004flx.1	chrX	153759605	153775233
RNAP II total	UNG	uc001tnz.1	chr12	109535414	109548798
RNAP II total	NR4A1	uc010sno.1	chr12	52416615	52453285
RNAP II total	SEC24C	uc010qkn.1	chr10	75504131	75526611
RNAP II total	KLF10	uc011lhj.1	chr8	103661004	103666168
RNAP II total	RXRA	uc004cfb.2	chr9	137218315	137332431
RNAP II total	NRIP1	uc002yjx.2	chr21	16333555	16437126
RNAP II total	APPBP2	uc002iys.1	chr17	58520519	58603580
RNAP II total	NRAS	uc009wgu.2	chr1	115247078	115259515
RNAP II total	RPS19	uc002ort.2	chr19	42363987	42375482
RNAP II total	SDHB	uc001bae.2	chr1	17345226	17380665
RNAP II total	TOB1	uc002isw.2	chr17	48939588	48941413
RNAP II total	HIST2H2BE	uc001etc.2	chr1	149856011	149858232
RNAP II total	POLR2A	uc002ghe.2	chr17	7387849	7403075
RNAP II total	SPINT1	uc001znb.2	chr15	41136245	41149852
RNAP II total	U2AF1	uc002zcz.1	chr21	44513065	44527688
RNAP II total	TRAF4	uc002hcs.2	chr17	27071022	27077975
RNAP II total	EPHB4	uc003uwn.1	chr7	100400186	100425143
RNAP II total	BAMBI	uc001iuj.1	chr10	28966423	28971868
RNAP II total	PCF11	uc001ozy.2	chr11	82868230	82869913
RNAP II total	LZTR1	uc010gsr.1	chr22	21341792	21348960
RNAP II total	STC2	uc003mcn.1	chr5	172741725	172754724
RNAP II total	ERF	uc002ote.3	chr19	42751717	42759309
RNAP II total	ZNF217	uc002xwq.3	chr20	52183611	52199707
RNAP II total	JUND	uc002nip.2	chr19	18390562	18392432
RNAP II total	GSTT1	uc010gui.1	chr22	24382269	24384284
RNAP II total	MAPRE3	uc010yld.1	chr2	27237632	27246844
RNAP II total	SOLH	uc002chi.2	chr16	577855	604634
RNAP II total	SP2	uc002imk.2	chr17	45973515	46006321
RNAP II total	EEF1A2	uc002yfe.1	chr20	62119365	62130505
RNAP II total	TFAP2A	uc003mys.2	chr6	10396916	10415470
RNAP II total	FOXA1	uc010tpz.1	chr14	38059192	38063467
RNAP II total	MYB	uc003qfv.2	chr6	135502452	135540313
RNAP II total	DYRK1B	uc002omi.2	chr19	40315990	40324841
RNAP II total	ADAM8	uc010quz.1	chr10	135075920	135090372
RNAP II total	PFDN4	uc002xwx.2	chr20	52824501	52836491
RNAP II total	CYP1A1	uc010bjv.2	chr15	75011883	75017877
RNAP II total	DDX18	uc002tlh.1	chr2	118572254	118589953
RNAP II total	PRSS22	uc002cry.1	chr16	2902727	2908171
RNAP II total	HIST1H4C	uc003ngi.2	chr6	26104175	26104564
RNAP II total	EGR3	uc011kzn.1	chr8	22545173	22549902
RNAP II total	PI4KB	uc009wmq.1	chr1	151288048	151300133
RNAP II total	P2RY2	uc001otj.2	chr11	72929343	72947393
RNAP II total	SOCS3	uc002jvl.2	chr17	76352858	76356158
RNAP II total	CBX4	uc002jxe.2	chr17	77806955	77813213
RNAP II total	DLEC1	uc010hgx.1	chr3	38138059	38159102
RNAP II total	HIST1H4E	uc003ngy.2	chr6	26204872	26205248
RNAP II total	TFRC	uc003fvz.3	chr3	195776155	195808961
RNAP II total	GADD45B	uc002lwb.1	chr19	2476134	2478257
RNAP II total	ID3	uc001bhh.3	chr1	23884409	23886322
RNAP II total	ADAM11	uc002ihh.2	chr17	42836567	42859212
RNAP II total	HIST1H4D	uc003ngu.2	chr6	26188938	26189304
RNAP II total	DDX17	uc011anu.1	chr22	38886318	38903665
RNAP II total	HIST1H4H	uc003nhl.1	chr6	26281282	26285762
RNAP II total	EIF5	uc001ymq.2	chr14	103800492	103811359
RNAP II total	RING1	uc003odk.2	chr6	33176285	33180498
RNAP II total	SPTAN1	uc010myf.1	chr9	131388669	131391322
RNAP II total	HMGN2	uc001bmp.3	chr1	26798901	26803131
RNAP II total	SUMO2	uc002jne.2	chr17	73163825	73179098
RNAP II total	SLC1A5	uc002pfr.2	chr19	47278141	47290545
RNAP II total	ILF3	uc002mpo.2	chr19	10764936	10803093
RNAP II total	CRIP2	uc010tyr.1	chr14	105939342	105946500
RNAP II total	UCP2	uc001oup.1	chr11	73685715	73693889
RNAP II total	KRT8	uc009zmk.1	chr12	53290970	53320253
RNAP II total	HMG20B	uc010xhn.1	chr19	3573289	3577121
RNAP II total	TRIP6	uc010lhk.1	chr7	100464949	100468365
RNAP II total	FOS	uc001xrn.2	chr14	75745480	75748935
RNAP II total	EWSR1	uc003aev.2	chr22	29663997	29696514
RNAP II total	SFN	uc001bnc.1	chr1	27189632	27190947
RNAP II total	ECM1	uc001eus.2	chr1	150480486	150486264
RNAP II total	HIST1H1C	uc003nfw.2	chr6	26055968	26056699
RNAP II total	DUSP5	uc001kzd.2	chr10	112257624	112271300
RNAP II total	EMD	uc004fkl.2	chrX	153607596	153609881
RNAP II total	GATA3	uc001ijz.2	chr10	8096666	8117162
RNAP II total	HIST1H2BD	uc003ngs.2	chr6	26158348	26171574
RNAP II total	CDC37	uc002mof.1	chr19	10501808	10514271
RNAP II total	SLC25A1	uc002zoy.2	chr22	19163094	19166034
RNAP II total	IDH2	uc010uqb.1	chr15	90627213	90643927
RNAP II total	ITPK1	uc001ybg.2	chr14	93406068	93582263
RNAP II total	IRX5	uc002ehv.2	chr16	54965110	54968393
RNAP II total	TUBD1	uc010ddg.1	chr17	57936850	57970296
RNAP II total	ZFP36L1	uc001xkh.1	chr14	69254374	69259785
RNAP II total	SPRED2	uc010fcw.2	chr2	65537985	65593931
RNAP II total	MOAP1	uc001ybj.2	chr14	93648542	93651249
RNAP II total	ZC3H3	uc003yyd.2	chr8	144519824	144623620
RNAP II total	IRF2BP1	uc002pds.1	chr19	46386865	46389376
RNAP II total	COL11A2	uc003ocx.1	chr6	33130468	33160245
RNAP II total	CT62	uc002ata.2	chr15	71402582	71407839
RNAP II total	SELENBP1	uc001exx.2	chr1	151336780	151345164
RNAP II total	HIST1H1D	uc003nhd.2	chr6	26234440	26235216
RNAP II total	ARPP19	uc002ace.1	chr15	52839431	52861364
RNAP II total	VPS52	uc003odm.1	chr6	33218048	33239662
RNAP II total	MYO1C	uc002fsn.2	chr17	1367481	1389051
RNAP II total	NEAT1	uc010rog.1	chr11	65190268	65207625
RNAP II total	TSC22D1	uc001uzn.3	chr13	45007660	45150701
RNAP II total	SEC16A	uc010nbo.1	chr9	139368500	139377507
RNAP II total	ATP8B2	uc001fex.2	chr1	154300275	154323779
RNAP II total	NCR2	uc003oqi.2	chr6	41303527	41318625
RNAP II total	HERPUD1	uc002eke.1	chr16	56965747	56977793
RNAP II total	COPZ1	uc001sfs.1	chr12	54718910	54745633
RNAP II total	DDX56	uc003tlg.2	chr7	44605403	44614137
RNAP II total	RAB11B	uc002mju.3	chr19	8455204	8469315
RNAP II total	BAG3	uc001lem.2	chr10	121410881	121437327
RNAP II total	FAM65A	uc002eth.2	chr16	67562753	67580688
RNAP II total	SLC38A2	uc001rpg.2	chr12	46751971	46766645
RNAP II total	NIF3L1	uc002uwo.2	chr2	201754107	201768655
RNAP II total	C6orf211	uc003qok.1	chr6	151773421	151791232
RNAP II total	TSKU	uc001oxt.2	chr11	76494284	76509197
RNAP II total	GALNT7	uc003isz.3	chr4	174089903	174245117
RNAP II total	PSMG2	uc002krg.2	chr18	12658737	12725737
RNAP II total	WDR59	uc002fdh.1	chr16	74907470	75019017
RNAP II total	IER5	uc001got.3	chr1	181057637	181059977
RNAP II total	PLEKHF2	uc003yhn.1	chr8	96146037	96168911
RNAP II total	CCDC59	uc001szp.3	chr12	82746089	82752199
RNAP II total	KLF2	uc002ndw.2	chr19	16435650	16438337
RNAP II total	SERTAD3	uc002onu.3	chr19	40946748	40948505
RNAP II total	C17orf59	uc010vut.1	chr17	8091651	8093564
RNAP II total	C16orf59	uc002cqh.2	chr16	2510114	2514963
RNAP II total	KLF3	uc003gtg.2	chr4	38665789	38692372
RNAP II total	SIDT1	uc003eak.2	chr3	113251217	113348421
RNAP II total	PILRB	uc003uuk.2	chr7	99933736	99965451
RNAP II total	TRIM8	uc001kvz.2	chr10	104404251	104418076
RNAP II total	MYL12B	uc002klt.3	chr18	3262110	3278280
RNAP II total	HSPB8	uc001txb.2	chr12	119616594	119632550
RNAP II total	CCDC99	uc010jjj.2	chr5	169010637	169029024
RNAP II total	KIAA1609	uc010vod.1	chr16	84509967	84538288
RNAP II total	B4GALT7	uc003mhy.2	chr5	177027171	177037323
RNAP II total	ZNF703	uc003xjy.1	chr8	37553300	37556396
RNAP II total	C19orf43	uc002muu.2	chr19	12841454	12845529
RNAP II total	CLPTM1L	uc003jch.2	chr5	1318006	1345002
RNAP II total	SELS	uc010use.1	chr15	101811213	101817700
RNAP II total	SERTAD1	uc002ont.3	chr19	40928410	40931932
RNAP II total	C7orf36	uc003thc.3	chr7	39606008	39612470
RNAP II total	FAM178B	uc002sxl.3	chr2	97541619	97652301
RNAP II total	ZAN	uc003uwj.2	chr7	100331248	100395418
RNAP II total	MRPL27	uc002iqq.2	chr17	48445228	48450562
RNAP II total	PIM3	uc003bjb.2	chr22	50354142	50357719
RNAP II total	MYADM	uc002qcl.2	chr19	54369610	54379682
RNAP II total	CCDC115	uc002tqw.1	chr2	131095815	131099698
RNAP II total	LEMD2	uc003ofe.2	chr6	33738990	33756902
RNAP II total	PHF5A	uc003bab.2	chr22	41855721	41864708
RNAP II total	MRPL21	uc001ooh.2	chr11	68658746	68671303
RNAP II total	LOC93622	uc003gjk.1	chr4	6675817	6677774
RNAP II total	DEDD2	uc002osu.1	chr19	42702751	42721813
RNAP II total	PAN3	uc001ury.2	chr13	28748408	28869469
RNAP II total	SLC27A4	uc004but.2	chr9	131102839	131123501
RNAP II total	FAM84B	uc003yrz.1	chr8	127564686	127570466
RNAP II total	AEBP2	uc001ref.2	chr12	19592607	19675173
RNAP II total	MIDN	uc002lrp.2	chr19	1248551	1259139
RNAP II total	RUNDC1	uc002ici.1	chr17	41132581	41145707
RNAP II total	IER5L	uc010myt.1	chr9	131937830	131940540
RNAP II total	TRIM11	uc001hss.2	chr1	228581378	228594517
RNAP II total	FAM20C	uc003sip.2	chr7	192968	300711
RNAP II total	JOSD2	uc002psn.1	chr19	51009258	51014345
RNAP II total	HES4	uc001aci.2	chr1	934341	935552
RNAP II total	ZNF48	uc002dxz.1	chr16	30406776	30410715
RNAP II total	UCA1	uc002nbr.3	chr19	15939756	15946230
RNAP II total	RHPN1	uc003yyb.2	chr8	144451024	144466389
RNAP II total	C14orf80	uc001yrm.2	chr14	105957585	105965584
RNAP II total	SIK1	uc002zdf.2	chr21	44834397	44847002
RNAP II total	LRRC29	uc010vjg.1	chr16	67244251	67260901
RNAP II total	SSPO	uc010lpk.2	chr7	149473130	149531051
RNAP II total	SMCR7	uc002gsu.2	chr17	18163847	18169093
RNAP II total	SCARNA2	uc001dwo.1	chr1	109642814	109643234
RNAP II total	FLJ45983	uc010qbe.1	chr10	8092412	8095447
RNAP II total	A1BG	uc002qsd.3	chr19	58858173	58864865
no Peak	AAK1	uc002sfp.2	chr2	69685126	69870977
no Peak	AARSD1	uc010whg.1	chr17	41102544	41132545
no Peak	AASDHPPT	uc001pjc.1	chr11	105948291	105969419
no Peak	AASDH	uc003hbn.2	chr4	57204458	57253638
no Peak	AATF	uc002hni.2	chr17	35306174	35414170
no Peak	ABCB8	uc003wij.3	chr7	150725509	150734644
no Peak	ABCD4	uc001xpr.2	chr14	74751979	74769767
no Peak	ABCF1	uc003nql.2	chr6	30539169	30559307
no Peak	ABCF2	uc003wjo.1	chr7	150904922	150924317
no Peak	ABCF3	uc003fmz.2	chr3	183903862	183911795
no Peak	ABCG2	uc003hrh.2	chr4	89011416	89152474
no Peak	ABHD3	uc002ktl.2	chr18	19230857	19284766
no Peak	ABHD5	uc003cmx.2	chr3	43732374	43764216
no Peak	ABHD8	uc002ngb.3	chr19	17402940	17414282
no Peak	ABL1	uc004bzv.2	chr9	133589267	133763060
no Peak	ABLIM1	uc010qsh.1	chr10	116190869	116444414
no Peak	ABR	uc002fsh.1	chr17	913968	995100
no Peak	ACAA2	uc002ldx.3	chr18	47309874	47340283
no Peak	ACACA	uc010cuz.2	chr17	35578439	35716059
no Peak	ACACB	uc001tob.2	chr12	109554399	109706028
no Peak	ACAD10	uc001tsp.2	chr12	112123856	112187007
no Peak	ACBD3	uc001hpy.2	chr1	226332381	226374423
no Peak	ACBD6	uc001gog.2	chr1	180257352	180472022
no Peak	ACOT4	uc001xoo.2	chr14	74058409	74062468
no Peak	ACOT9	uc004dao.2	chrX	23721777	23761407
no Peak	ACOX3	uc003glc.3	chr4	8368009	8442452
no Peak	ACP2	uc010rhi.1	chr11	47264273	47270457
no Peak	ACSS1	uc002wub.2	chr20	24986873	25039616
no Peak	ACTN1	uc001xkm.2	chr14	69340840	69446083
no Peak	ACTR1B	uc002syb.2	chr2	98272401	98280561
no Peak	ACVR1B	uc010snn.1	chr12	52345485	52390859
no Peak	ACVR1	uc010fog.2	chr2	158592957	158732374
no Peak	ACYP2	uc002rxq.3	chr2	54342409	54532433
no Peak	ADAM15	uc010pet.1	chr1	155023761	155031006
no Peak	ADAMTS19	uc003kvb.1	chr5	128796102	129074376
no Peak	ADAT1	uc002feo.1	chr16	75632997	75657154
no Peak	ADCK1	uc001xui.2	chr14	78266425	78400296
no Peak	ADCK4	uc002oos.2	chr19	41210072	41222790
no Peak	ADCY9	uc002cvx.2	chr16	4012652	4166186
no Peak	ADD3	uc001kyt.3	chr10	111756107	111895320
no Peak	ADH5	uc003hui.2	chr4	99992131	100009931
no Peak	ADPGK	uc002avj.1	chr15	73074464	73076667
no Peak	ADPRHL1	uc001vtq.1	chr13	114076259	114107839
no Peak	ADRBK2	uc003aby.3	chr22	25960860	26125256
no Peak	ADSS	uc001iaj.2	chr1	244571796	244615413
no Peak	AFF1	uc011ccz.1	chr4	87856162	88062190
no Peak	AFF3	uc002tag.2	chr2	100163717	100759037
no Peak	AFMID	uc002juz.3	chr17	76183397	76203782
no Peak	AGA	uc003iuu.1	chr4	178351923	178363591
no Peak	AGFG1	uc002vpd.2	chr2	228336887	228425938
no Peak	AGFG2	uc003uvg.1	chr7	100136833	100153990
no Peak	AGGF1	uc003ket.2	chr5	76326231	76361035
no Peak	AGL	uc001dsi.1	chr1	100315639	100389579
no Peak	AGPAT3	uc002zdv.2	chr21	45285115	45407474
no Peak	AGPAT6	uc003xnz.2	chr8	41435706	41482520
no Peak	AHCYL1	uc001dyx.2	chr1	110527307	110566363
no Peak	AHCY	uc002xaj.2	chr20	32868072	32899608
no Peak	AHDC1	uc009vsy.2	chr1	27860793	27930143
no Peak	AHI1	uc003qgi.2	chr6	135605111	135818903
no Peak	AHNAK	uc001ntk.1	chr11	62201015	62314332
no Peak	AHR	uc011jxz.1	chr7	17338275	17385775
no Peak	AHSA1	uc001xtw.2	chr14	77924372	77935807
no Peak	AIFM1	uc011mus.1	chrX	129263339	129299808
no Peak	AIMP1	uc011cfg.1	chr4	107236766	107270379
no Peak	AK1	uc004bsm.3	chr9	130628760	130640022
no Peak	AK7	uc001yfn.2	chr14	96858447	96955112
no Peak	AKAP10	uc002gwo.2	chr17	19808751	19881129
no Peak	AKAP1	uc002iux.2	chr17	55162552	55198709
no Peak	AKIRIN1	uc001ccw.2	chr1	39456915	39471735
no Peak	AKR1A1	uc001cod.2	chr1	46016497	46035720
no Peak	AKR7A2	uc001bbw.2	chr1	19630458	19638640
no Peak	AKTIP	uc010vgx.1	chr16	53528693	53537170
no Peak	ALCAM	uc003dvx.2	chr3	105085712	105295743
no Peak	ALDH4A1	uc001bbb.2	chr1	19197925	19229293
no Peak	ALDH5A1	uc003nef.2	chr6	24495196	24537434
no Peak	ALDH7A1	uc003ktx.2	chr5	125878917	125931082
no Peak	ALG10	uc001rlm.2	chr12	34175215	34181234
no Peak	ALG12	uc003biy.2	chr22	50296855	50312106
no Peak	ALG13	uc011msy.1	chrX	110924412	111003603
no Peak	ALG8	uc001oyz.1	chr11	77811987	77850699
no Peak	ALG9	uc010rwo.1	chr11	111652919	111750153
no Peak	ALKBH1	uc001xuc.1	chr14	78138748	78174356
no Peak	ALKBH5	uc010cpw.2	chr17	18086866	18113265
no Peak	ALMS1	uc002sje.1	chr2	73612885	73837046
no Peak	AMACR	uc003jig.2	chr5	33987905	34008206
no Peak	AMBRA1	uc001ncv.2	chr11	46417963	46615571
no Peak	AMD1	uc011eay.1	chr6	111135823	111216913
no Peak	AMFR	uc002eiy.2	chr16	56395364	56459444
no Peak	AMIGO1	uc001dxx.3	chr1	110049446	110052336
no Peak	AMMECR1	uc004eoq.2	chrX	109437414	109683458
no Peak	AMOTL1	uc001pfb.2	chr11	94501507	94609917
no Peak	AMPD2	uc009wfh.1	chr1	110162458	110174677
no Peak	ANAPC10	uc003ijw.3	chr4	145916313	146019368
no Peak	ANAPC1	uc002thi.2	chr2	112526640	112641741
no Peak	ANAPC2	uc004clr.1	chr9	140069235	140083057
no Peak	ANAPC7	uc001tqo.2	chr12	110810704	110841535
no Peak	ANKIB1	uc003ulw.2	chr7	91875547	92030698
no Peak	ANKMY1	uc002vzd.1	chr2	241418838	241500275
no Peak	ANKRA2	uc003kcu.1	chr5	72848162	72861498
no Peak	ANKRD13C	uc001dex.3	chr1	70724685	70820417
no Peak	ANKRD16	uc010qat.1	chr10	5903690	5931860
no Peak	ANKRD26	uc009xku.1	chr10	27293044	27389427
no Peak	ANKRD27	uc002ntn.1	chr19	33087906	33166102
no Peak	ANKRD32	uc003kkr.3	chr5	93954390	94031571
no Peak	ANKRD46	uc003yjm.2	chr8	101521986	101572012
no Peak	ANKRD50	uc010inw.2	chr4	125585467	125633887
no Peak	ANKRD54	uc003auc.2	chr22	38226862	38240303
no Peak	ANKRD57	uc002tfb.2	chr2	110371910	110376563
no Peak	ANO10	uc003cmv.2	chr3	43407818	43663560
no Peak	ANO6	uc010sld.1	chr12	45609769	45834187
no Peak	ANP32A	uc002arl.2	chr15	69070876	69113261
no Peak	ANP32E	uc001etw.2	chr1	150190717	150208504
no Peak	ANXA11	uc001kbu.1	chr10	81914879	81965433
no Peak	ANXA2	uc002agn.2	chr15	60639350	60690185
no Peak	ANXA3	uc003hle.2	chr4	79472741	79531602
no Peak	ANXA5	uc003idv.3	chr4	122589152	122618147
no Peak	ANXA6	uc003ltl.1	chr5	150480267	150537367
no Peak	ANXA7	uc001jtz.2	chr10	75135188	75173841
no Peak	AP1AR	uc003iaj.3	chr4	113152894	113191209
no Peak	AP1G1	uc002fbb.2	chr16	71762906	71842976
no Peak	AP2S1	uc002pft.1	chr19	47341422	47354203
no Peak	AP3B1	uc003kfj.2	chr5	77298150	77590528
no Peak	AP3B2	uc010uoi.1	chr15	83328033	83378635
no Peak	AP3S1	uc003krk.2	chr5	115177618	115249776
no Peak	AP4E1	uc001zyx.1	chr15	51200945	51298097
no Peak	AP4S1	uc001wqy.3	chr14	31494682	31562634
no Peak	APC	uc010jby.2	chr5	112043217	112181935
no Peak	APIP	uc010reo.1	chr11	34896713	34937939
no Peak	APLP2	uc010sby.1	chr11	129939715	130014705
no Peak	APOE	uc002pab.2	chr19	45409038	45412649
no Peak	APPL2	uc001tlf.1	chr12	105567074	105630008
no Peak	APP	uc011aci.1	chr21	27252861	27543446
no Peak	APTX	uc003zrz.2	chr9	32972608	33025110
no Peak	AQP11	uc009yuu.2	chr11	77300435	77320691
no Peak	AQR	uc001ziv.2	chr15	35148552	35261995
no Peak	ARAP1	uc001osv.2	chr11	72396114	72504750
no Peak	ARF4	uc003dix.3	chr3	57557091	57583215
no Peak	ARF6	uc001wxg.3	chr14	50359735	50363771
no Peak	ARFGEF2	uc002xtx.3	chr20	47538274	47653229
no Peak	ARFIP1	uc003imz.2	chr4	153701111	153833061
no Peak	ARGLU1	uc001vqk.3	chr13	107195663	107220514
no Peak	ARHGAP27	uc002iix.2	chr17	43471268	43503012
no Peak	ARHGEF17	uc001otu.2	chr11	73019662	73080424
no Peak	ARHGEF1	uc002orx.2	chr19	42387266	42411600
no Peak	ARHGEF7	uc001vrv.3	chr13	111806035	111958080
no Peak	ARID1B	uc003qqn.2	chr6	157099085	157530401
no Peak	ARID2	uc001ros.1	chr12	46123619	46301819
no Peak	ARID3A	uc002lql.2	chr19	926036	972791
no Peak	ARID3B	uc002ayc.2	chr15	74833547	74867339
no Peak	ARID4A	uc001xdo.2	chr14	58765221	58840448
no Peak	ARID4B	uc001hwq.2	chr1	235330210	235491532
no Peak	ARID5A	uc002swe.2	chr2	97202463	97218370
no Peak	ARID5B	uc001jlt.1	chr10	63661442	63856703
no Peak	ARIH1	uc002aut.3	chr15	72766666	72878895
no Peak	ARL1	uc001tib.2	chr12	101786922	101801572
no Peak	ARL3	uc001kwa.2	chr10	104433489	104474190
no Peak	ARL4A	uc003ssr.2	chr7	12726480	12730556
no Peak	ARL4D	uc002idt.2	chr17	41476352	41478503
no Peak	ARL8B	uc003bqg.2	chr3	5163929	5222599
no Peak	ARMC5	uc010vfn.1	chr16	31469593	31478487
no Peak	ARMC7	uc002jmv.1	chr17	73106081	73110921
no Peak	ARMCX3	uc004ehz.1	chrX	100878119	100882831
no Peak	ARMCX5	uc004ejg.2	chrX	101854095	101859083
no Peak	ARPC3	uc001tqq.2	chr12	110872706	110888158
no Peak	ARPC5L	uc004boz.1	chr9	127626266	127631718
no Peak	ARPC5	uc001gql.2	chr1	183595332	183604985
no Peak	ARRB1	uc001owe.1	chr11	74976481	75062873
no Peak	ARRDC2	uc002nhu.2	chr19	18111943	18124905
no Peak	ARRDC4	uc002bui.3	chr15	98462783	98517067
no Peak	ARSD	uc004cqy.2	chrX	2822011	2847392
no Peak	ARVCF	uc002zra.2	chr22	19967520	19978335
no Peak	ASAH1	uc003wyn.2	chr8	17913924	17942507
no Peak	ASAP1	uc011liw.1	chr8	131064352	131414216
no Peak	ASB13	uc001iih.2	chr10	5680819	5708558
no Peak	ASCC1	uc010qju.1	chr10	73856277	73976892
no Peak	ASCC3	uc003pqk.2	chr6	100956608	101329224
no Peak	ASCL2	uc001lvu.2	chr11	2289728	2292182
no Peak	ASH1L	uc009wqr.1	chr1	155447676	155532585
no Peak	ASL	uc003tuo.2	chr7	65540775	65558321
no Peak	ASNS	uc003uou.3	chr7	97481442	97501854
no Peak	ASPG	uc001yoq.1	chr14	104552047	104579098
no Peak	ASPM	uc001gtu.2	chr1	197053257	197115824
no Peak	ASPSCR1	uc002kdb.1	chr17	79936061	79967443
no Peak	ASS1	uc004bzm.2	chr9	133320093	133376660
no Peak	ASXL2	uc002rgs.2	chr2	25962252	26101312
no Peak	ATAD3B	uc001afv.2	chr1	1407163	1431581
no Peak	ATE1	uc010qtt.1	chr10	123502625	123688217
no Peak	ATF5	uc010enq.1	chr19	50431973	50437192
no Peak	ATG10	uc003khs.2	chr5	81267843	81551211
no Peak	ATG2B	uc001yfi.2	chr14	96747595	96829678
no Peak	ATG3	uc003dzd.2	chr3	112251359	112280485
no Peak	ATL2	uc002rqq.2	chr2	38522030	38604432
no Peak	ATMIN	uc002ffz.1	chr16	81069457	81080951
no Peak	ATP1A1	uc001egd.2	chr1	116915794	116928766
no Peak	ATP2A3	uc002fwx.1	chr17	3827168	3867736
no Peak	ATP5A1	uc002lbt.1	chr18	43664109	43684199
no Peak	ATP5C1	uc001iju.2	chr10	7830092	7849755
no Peak	ATP5F1	uc001ebc.2	chr1	111991742	112004523
no Peak	ATP5G1	uc002iog.2	chr17	46970147	46973230
no Peak	ATP5G2	uc009znc.2	chr12	54058944	54070512
no Peak	ATP5G3	uc002uka.3	chr2	176040986	176046490
no Peak	ATP5J	uc002yls.2	chr21	27096791	27107965
no Peak	ATP5L	uc001psx.2	chr11	118272103	118280561
no Peak	ATP6V0E1	uc003mcd.1	chr5	172410762	172461900
no Peak	ATP6V1A	uc011bik.1	chr3	113465907	113530901
no Peak	ATP6V1E2	uc002ruz.2	chr2	46738987	46769696
no Peak	ATP6V1G1	uc004bjc.2	chr9	117349993	117361151
no Peak	ATP6V1H	uc003xrm.2	chr8	54628115	54755850
no Peak	ATP7A	uc004ecx.3	chrX	77166193	77305891
no Peak	ATPBD4	uc001zja.2	chr15	35663170	35838404
no Peak	ATRX	uc004eco.3	chrX	76760358	77041719
no Peak	ATXN1	uc003nbt.2	chr6	16299343	16761721
no Peak	ATXN7L1	uc003vde.2	chr7	105245220	105517031
no Peak	AURKAIP1	uc001afc.2	chr1	1309109	1310818
no Peak	AZI1	uc002jzn.1	chr17	79163392	79196751
no Peak	AZI2	uc003cec.2	chr3	28363846	28390618
no Peak	B2M	uc001zuc.2	chr15	45003684	45010356
no Peak	B3GALNT1	uc003fdw.2	chr3	160801672	160823160
no Peak	B3GNT2	uc002sbs.2	chr2	62423261	62451864
no Peak	B4GALT1	uc003zsg.2	chr9	33110638	33167356
no Peak	B4GALT4	uc003ece.1	chr3	118930586	118959752
no Peak	BACE2	uc002yyw.2	chr21	42539727	42648523
no Peak	BACH1	uc002ynj.2	chr21	30671219	30718467
no Peak	BAG4	uc003xky.1	chr8	38034105	38068537
no Peak	BANP	uc002fkp.2	chr16	87985037	88110923
no Peak	BARD1	uc002veu.2	chr2	215593274	215674428
no Peak	BATF	uc001xrr.2	chr14	75988783	76013327
no Peak	BAZ1A	uc001wsk.2	chr14	35221938	35344853
no Peak	BAZ2B	uc002uao.2	chr2	160175491	160473112
no Peak	BBS2	uc002ejd.2	chr16	56518258	56554008
no Peak	BBS4	uc010ukv.1	chr15	72978525	73030816
no Peak	BCAP29	uc003vej.2	chr7	107220421	107263762
no Peak	BCAR3	uc001dqb.2	chr1	94027350	94312706
no Peak	BCAS1	uc010zzc.1	chr20	52644411	52687304
no Peak	BCAS3	uc010wow.1	chr17	58755171	59115415
no Peak	BCAS4	uc002xvq.2	chr20	49411466	49493713
no Peak	BCL2L1	uc002wwl.2	chr20	30252262	30310656
no Peak	BCL2	uc002liu.1	chr18	60790578	60986657
no Peak	BCL3	uc010xxe.1	chr19	45251977	45263300
no Peak	BCL6	uc003frq.1	chr3	187439164	187463475
no Peak	BCL7B	uc003tyf.1	chr7	72950685	72972024
no Peak	BCL7C	uc002dzt.1	chr16	30845372	30905399
no Peak	BCL9	uc001epq.2	chr1	147013181	147098013
no Peak	BCLAF1	uc011edc.1	chr6	136578000	136610989
no Peak	BCORL1	uc004evb.1	chrX	129116668	129191601
no Peak	BCOR	uc004dep.3	chrX	39910500	40036582
no Peak	BCR	uc002zww.2	chr22	23522551	23660223
no Peak	BEGAIN	uc001yhq.2	chr14	101003485	101036131
no Peak	BEND3	uc003prs.2	chr6	107386384	107435636
no Peak	BET1L	uc001loe.2	chr11	202923	207422
no Peak	BICD1	uc001rku.2	chr12	32260184	32531140
no Peak	BICD2	uc004aso.1	chr9	95473644	95527083
no Peak	BIRC6	uc010ezu.2	chr2	32582095	32843963
no Peak	BLCAP	uc002xhc.2	chr20	36145819	36156303
no Peak	BLM	uc010uqh.1	chr15	91260578	91358684
no Peak	BLOC1S3	uc002pax.3	chr19	45682002	45685057
no Peak	BMI1	uc009xkg.2	chr10	22605298	22620417
no Peak	BMP4	uc001xao.3	chr14	54416456	54423554
no Peak	BMP7	uc002xyc.2	chr20	55748052	55841707
no Peak	BMPR1A	uc001kdy.2	chr10	88516395	88684944
no Peak	BMPR2	uc002uzf.3	chr2	203241049	203432473
no Peak	BMS1	uc001jaj.2	chr10	43277953	43330383
no Peak	BNIP1	uc003mci.3	chr5	172571444	172591389
no Peak	BOD1L	uc003gmz.1	chr4	13570365	13629328
no Peak	BOLA3	uc002skc.1	chr2	74362527	74375039
no Peak	BPTF	uc002jge.2	chr17	65821779	65980493
no Peak	BRAF	uc003vwc.3	chr7	140433814	140624564
no Peak	BRAP	uc001tsn.3	chr12	112079950	112123790
no Peak	BRCA1	uc010whp.1	chr17	41196312	41322420
no Peak	BRCC3	uc004fna.2	chrX	154299709	154351348
no Peak	BRD8	uc003lcc.1	chr5	137384972	137513356
no Peak	BRE	uc002rlq.2	chr2	28113481	28561765
no Peak	BRF1	uc010tyo.1	chr14	105675622	105781914
no Peak	BRI3BP	uc001uha.1	chr12	125478193	125510349
no Peak	BRIP1	uc002izk.1	chr17	59759984	59940755
no Peak	BRMS1L	uc001wtl.2	chr14	36295596	36341168
no Peak	BRP44L	uc003qva.2	chr6	166778409	166796486
no Peak	BRP44	uc001geu.2	chr1	167887310	167906303
no Peak	BTAF1	uc001khr.2	chr10	93683735	93790078
no Peak	BTBD1	uc002bjn.2	chr15	83685182	83736106
no Peak	BTBD9	uc003ooa.3	chr6	38136227	38607924
no Peak	BTRC	uc001kta.2	chr10	103113824	103317068
no Peak	BUB1	uc002tgc.2	chr2	111395410	111435684
no Peak	BUB3	uc001lhd.2	chr10	124913759	124924886
no Peak	BUD13	uc001ppo.2	chr11	116618887	116643714
no Peak	BZW1	uc002uwc.2	chr2	201676646	201688559
no Peak	BZW2	uc003stl.2	chr7	16685758	16746148
no Peak	C10orf118	uc001lbc.1	chr10	115881973	115934364
no Peak	C10orf12	uc009xvg.1	chr10	98592038	98742626
no Peak	C10orf27	uc001jrj.1	chr10	72530994	72545157
no Peak	C10orf46	uc010qst.1	chr10	120433633	120514758
no Peak	C11orf1	uc001pmd.2	chr11	111749947	111754795
no Peak	C11orf24	uc001onr.3	chr11	68028804	68039469
no Peak	C11orf48	uc001nuf.2	chr11	62430289	62439241
no Peak	C11orf54	uc009ywi.2	chr11	93474792	93496246
no Peak	C11orf58	uc010rct.1	chr11	16760147	16779901
no Peak	C11orf68	uc009yqv.2	chr11	65684283	65686531
no Peak	C11orf73	uc010rto.1	chr11	86013252	86056984
no Peak	C12orf11	uc001rhk.3	chr12	27058114	27091254
no Peak	C12orf26	uc001szq.2	chr12	82752323	82872941
no Peak	C12orf45	uc001tlb.2	chr12	105380097	105388504
no Peak	C12orf47	uc001tsy.2	chr12	112277572	112280706
no Peak	C12orf49	uc001tvz.1	chr12	117153595	117175843
no Peak	C12orf5	uc001qmp.2	chr12	4430358	4469188
no Peak	C12orf62	uc001rwb.1	chr12	50505899	50514234
no Peak	C12orf66	uc001srw.3	chr12	64586419	64616076
no Peak	C13orf23	uc001uwy.2	chr13	39584002	39612252
no Peak	C13orf27	uc001vpo.2	chr13	103418464	103426149
no Peak	C14orf101	uc001xcj.2	chr14	57046337	57116230
no Peak	C14orf129	uc001yfj.3	chr14	96829862	96853561
no Peak	C14orf142	uc001ybl.1	chr14	93669236	93673459
no Peak	C14orf147	uc001wsc.2	chr14	34902144	34931468
no Peak	C14orf149	uc001xee.1	chr14	59939405	59951073
no Peak	C14orf178	uc001xug.1	chr14	78226892	78236085
no Peak	C14orf179	uc010asm.1	chr14	76452095	76550092
no Peak	C14orf182	uc001wxi.1	chr14	50448429	50474238
no Peak	C14orf2	uc001yoj.3	chr14	104378625	104387903
no Peak	C14orf43	uc010tud.1	chr14	74185548	74206958
no Peak	C14orf93	uc001wig.2	chr14	23456110	23479360
no Peak	C15orf24	uc001zhm.2	chr15	34376225	34394053
no Peak	C15orf29	uc001zhp.2	chr15	34432875	34502297
no Peak	C15orf61	uc002aqs.2	chr15	67813521	67819638
no Peak	C16orf55	uc002fnw.1	chr16	89724209	89737675
no Peak	C16orf58	uc010vfq.1	chr16	31504796	31519706
no Peak	C16orf62	uc002dgn.1	chr16	19567039	19712444
no Peak	C16orf72	uc002czm.2	chr16	9185536	9213545
no Peak	C16orf74	uc002fjc.3	chr16	85741125	85784689
no Peak	C16orf75	uc002daq.1	chr16	11343505	11445617
no Peak	C16orf80	uc002enb.1	chr16	58147496	58163296
no Peak	C17orf101	uc002ket.1	chr17	80350099	80376462
no Peak	C17orf103	uc010vzx.1	chr17	21142185	21156578
no Peak	C17orf56	uc002jzu.1	chr17	79202078	79212855
no Peak	C17orf71	uc002ixi.2	chr17	57287370	57292610
no Peak	C17orf85	uc002fwq.2	chr17	3714459	3749540
no Peak	C17orf86	uc002jtk.3	chr17	75084724	75091067
no Peak	C17orf90	uc002kbb.2	chr17	79632066	79633625
no Peak	C17orf96	uc010wdq.1	chr17	36827960	36831187
no Peak	C18orf19	uc010dlh.2	chr18	13663349	13726591
no Peak	C18orf1	uc002ksa.2	chr18	13218785	13652753
no Peak	C18orf21	uc002kzc.2	chr18	33552587	33559240
no Peak	C18orf25	uc002lbw.2	chr18	43753987	43846954
no Peak	C18orf45	uc002kuf.2	chr18	20875980	21017925
no Peak	C19orf21	uc002lpo.2	chr19	751145	764319
no Peak	C19orf22	uc002lqg.2	chr19	896502	913225
no Peak	C19orf23	uc010xgk.1	chr19	1267470	1270259
no Peak	C19orf29	uc002lyh.2	chr19	3610628	3626813
no Peak	C19orf2	uc002nsr.2	chr19	30433424	30506611
no Peak	C19orf46	uc010een.1	chr19	36494001	36500273
no Peak	C19orf55	uc002obq.1	chr19	36249043	36260077
no Peak	C19orf61	uc002oxj.2	chr19	44235300	44259142
no Peak	C19orf68	uc002pic.3	chr19	48673948	48700877
no Peak	C1D	uc010fdc.2	chr2	68269332	68290159
no Peak	C1orf103	uc001eaa.2	chr1	111489812	111506566
no Peak	C1orf106	uc001gvo.2	chr1	200860638	200884863
no Peak	C1orf133	uc001hhx.3	chr1	210404803	210407466
no Peak	C1orf163	uc001cui.1	chr1	53152513	53164038
no Peak	C1orf182	uc001foo.2	chr1	156307104	156316783
no Peak	C1orf183	uc001ebp.1	chr1	112268369	112298419
no Peak	C1orf216	uc001bzh.1	chr1	36179476	36184790
no Peak	C1orf21	uc001gqv.1	chr1	184356149	184598155
no Peak	C1orf228	uc001cmf.2	chr1	45140393	45191263
no Peak	C1orf27	uc001grw.2	chr1	186344889	186390502
no Peak	C1orf51	uc001euh.2	chr1	150254952	150259502
no Peak	C1orf53	uc001guh.2	chr1	197871681	197876495
no Peak	C1orf55	uc001hpu.3	chr1	226170403	226187066
no Peak	C1orf96	uc001htl.3	chr1	229456752	229478688
no Peak	C1orf97	uc001hil.3	chr1	211556096	211605876
no Peak	C20orf160	uc002wxf.2	chr20	30598244	30619984
no Peak	C20orf177	uc002yba.2	chr20	58508818	58522559
no Peak	C20orf194	uc002wii.2	chr20	3229947	3388255
no Peak	C20orf29	uc002wjs.1	chr20	3801187	3805954
no Peak	C20orf30	uc010gbi.2	chr20	5049129	5093733
no Peak	C20orf4	uc002xfd.1	chr20	34824380	34858840
no Peak	C20orf94	uc010zre.1	chr20	10415950	10604025
no Peak	C21orf105	uc002zco.2	chr21	44336926	44345731
no Peak	C21orf122	uc011afn.1	chr21	46490872	46493126
no Peak	C21orf58	uc002zja.2	chr21	47720344	47740739
no Peak	C21orf67	uc011afm.1	chr21	46353199	46359828
no Peak	C21orf70	uc002zgl.2	chr21	46359954	46396887
no Peak	C2orf42	uc002sgh.2	chr2	70377018	70418151
no Peak	C2orf43	uc002rea.1	chr2	20883802	21022827
no Peak	C2orf44	uc002rep.2	chr2	24252205	24270296
no Peak	C2orf64	uc002sza.2	chr2	99215865	99262005
no Peak	C2orf74	uc010ypl.1	chr2	61372242	61391964
no Peak	C2orf76	uc002tlu.2	chr2	120060019	120124404
no Peak	C2orf79	uc002rfm.2	chr2	25013137	25016251
no Peak	C3orf10	uc003bvb.2	chr3	10157332	10168873
no Peak	C3orf14	uc003dlf.2	chr3	62304710	62319318
no Peak	C3orf21	uc003fum.3	chr3	194789014	194991895
no Peak	C3orf23	uc010him.2	chr3	44379610	44450939
no Peak	C3orf26	uc003dtl.2	chr3	99536680	99897446
no Peak	C3orf31	uc003bwi.2	chr3	11831919	11888352
no Peak	C3orf34	uc011btw.1	chr3	196433148	196439123
no Peak	C3orf37	uc003elt.2	chr3	128997683	129024133
no Peak	C3orf38	uc003dqw.2	chr3	88198892	88207113
no Peak	C3orf57	uc003fee.2	chr3	161062580	161089871
no Peak	C3orf58	uc003evo.2	chr3	143690639	143711209
no Peak	C3orf75	uc003crk.2	chr3	47537130	47555199
no Peak	C4orf29	uc003ifs.2	chr4	128886460	128957474
no Peak	C4orf52	uc003grw.3	chr4	25915813	25931500
no Peak	C5orf13	uc003kpk.2	chr5	110998322	111092945
no Peak	C5orf15	uc003kyo.2	chr5	133291198	133304406
no Peak	C5orf24	uc003kzx.2	chr5	134181369	134195424
no Peak	C5orf28	uc003jnx.2	chr5	43444354	43483992
no Peak	C5orf33	uc011cov.1	chr5	36192694	36242258
no Peak	C5orf34	uc011cpx.1	chr5	43505653	43515187
no Peak	C5orf39	uc003jnf.2	chr5	43039182	43040447
no Peak	C5orf43	uc010iwm.1	chr5	60453535	60458302
no Peak	C5orf54	uc003lyf.1	chr5	159820154	159827060
no Peak	C5orf55	uc010ita.2	chr5	441644	443258
no Peak	C6orf115	uc003qil.2	chr6	139349818	139364439
no Peak	C6orf125	uc010jve.1	chr6	33669122	33679504
no Peak	C6orf168	uc003ppj.3	chr6	99720793	99797531
no Peak	C6orf203	uc011eaj.1	chr6	107349406	107372544
no Peak	C6orf52	uc011dil.1	chr6	10671652	10695030
no Peak	C6orf64	uc003ook.1	chr6	39071839	39082865
no Peak	C6orf70	uc003qxg.1	chr6	170151720	170181617
no Peak	C6orf89	uc003omv.2	chr6	36839645	36896738
no Peak	C7orf11	uc003thl.3	chr7	40172342	40174258
no Peak	C7orf13	uc003wmm.2	chr7	156431061	156433348
no Peak	C7orf26	uc003sqp.1	chr7	6629914	6648355
no Peak	C7orf52	uc003uxz.1	chr7	100813777	100823557
no Peak	C7orf70	uc003spu.2	chr7	6369040	6388590
no Peak	C8orf38	uc011lgs.1	chr8	96037220	96088396
no Peak	C8orf40	uc011lcv.1	chr8	42396297	42408139
no Peak	C8orf76	uc003yqc.1	chr8	124232230	124253617
no Peak	C9orf102	uc011lun.1	chr9	98734214	98801358
no Peak	C9orf103	uc004amt.1	chr9	86237965	86259038
no Peak	C9orf116	uc004cfu.1	chr9	138387025	138392364
no Peak	C9orf119	uc004bup.2	chr9	131038424	131051267
no Peak	C9orf130	uc004avp.3	chr9	98568371	98638259
no Peak	C9orf156	uc004axw.1	chr9	100666771	100684852
no Peak	C9orf21	uc004awm.2	chr9	99403533	99417599
no Peak	C9orf23	uc003zuu.2	chr9	34610492	34612101
no Peak	C9orf46	uc003zjd.2	chr9	5357972	5630071
no Peak	C9orf64	uc004anc.2	chr9	86553228	86571901
no Peak	C9orf66	uc003zge.3	chr9	213108	215893
no Peak	C9orf69	uc004cgx.3	chr9	139006427	139010731
no Peak	C9orf78	uc004byp.2	chr9	132589564	132597572
no Peak	C9orf80	uc004bgg.2	chr9	115448792	115480387
no Peak	C9orf82	uc003zqc.2	chr9	26840683	26892725
no Peak	C9orf85	uc010mov.2	chr9	74526422	74599390
no Peak	C9orf89	uc004ate.2	chr9	95858449	95875564
no Peak	C9orf91	uc004bjd.3	chr9	117373705	117408696
no Peak	C9orf95	uc004ajs.3	chr9	77676117	77703133
no Peak	CA12	uc002amc.2	chr15	63615730	63674075
no Peak	CA4	uc002iym.3	chr17	58227301	58236904
no Peak	CA8	uc003xtz.1	chr8	61101422	61193954
no Peak	CACNA1F	uc004dnb.2	chrX	49061523	49089833
no Peak	CACNG4	uc002jft.1	chr17	64961012	65029518
no Peak	CADM1	uc001ppf.3	chr11	115039952	115375241
no Peak	CAD	uc002rji.2	chr2	27440257	27466653
no Peak	CALD1	uc003vrz.2	chr7	134464170	134655470
no Peak	CALM1	uc010atq.1	chr14	90863372	90874610
no Peak	CAMK2D	uc003ibo.3	chr4	114372189	114683083
no Peak	CAMK2G	uc001jvv.1	chr10	75576236	75634343
no Peak	CAMSAP1L1	uc001gvl.2	chr1	200708685	200829829
no Peak	CANX	uc010jlb.1	chr5	179125929	179147561
no Peak	CAPN13	uc002rnn.2	chr2	30945639	31030311
no Peak	CAPRIN1	uc001mvg.2	chr11	34073229	34120605
no Peak	CAPZA2	uc003vil.2	chr7	116502562	116559312
no Peak	CAPZB	uc001bce.2	chr1	19665273	19811992
no Peak	CARS	uc001lxe.2	chr11	3022159	3078671
no Peak	CASC3	uc002hue.2	chr17	38296506	38328432
no Peak	CASD1	uc003uni.3	chr7	94139169	94186326
no Peak	CASP7	uc001lam.2	chr10	115438934	115490662
no Peak	CAV1	uc010lkd.1	chr7	115929905	116201230
no Peak	CBFA2T3	uc010cif.1	chr16	88947519	89008217
no Peak	CBX1	uc002ine.3	chr17	46147414	46178883
no Peak	CBX3	uc003sxt.2	chr7	26241098	26252974
no Peak	CBX5	uc001sfk.3	chr12	54624731	54673915
no Peak	CBX7	uc003axb.2	chr22	39526789	39548538
no Peak	CBX8	uc002jxd.1	chr17	77768175	77770890
no Peak	CC2D1B	uc001ctq.1	chr1	52816266	52831864
no Peak	CCAR1	uc001joo.2	chr10	70480970	70551307
no Peak	CCBL1	uc011mbl.1	chr9	131595392	131644354
no Peak	CCDC123	uc002nty.2	chr19	33369905	33462869
no Peak	CCDC124	uc010xpz.1	chr19	18043823	18054793
no Peak	CCDC12	uc003cqo.2	chr3	46963219	47018270
no Peak	CCDC130	uc010xnf.1	chr19	13842573	13870086
no Peak	CCDC137	uc002kbd.2	chr17	79633760	79640934
no Peak	CCDC138	uc002ten.1	chr2	109403218	109492847
no Peak	CCDC14	uc011bjx.1	chr3	123632275	123680255
no Peak	CCDC15	uc001qbm.3	chr11	124824016	124911383
no Peak	CCDC25	uc003xgc.2	chr8	27590834	27630170
no Peak	CCDC47	uc002jbt.2	chr17	61829129	61851088
no Peak	CCDC48	uc011bkt.1	chr3	128720471	128759583
no Peak	CCDC53	uc010svx.1	chr12	102406717	102455899
no Peak	CCDC55	uc002hev.2	chr17	28443833	28513485
no Peak	CCDC58	uc003eey.2	chr3	122078436	122102074
no Peak	CCDC6	uc001jks.3	chr10	61548521	61666818
no Peak	CCDC80	uc003dzf.2	chr3	112323410	112359977
no Peak	CCDC83	uc001pbg.1	chr11	85566143	85631051
no Peak	CCDC88C	uc010aty.2	chr14	91737668	91884133
no Peak	CCDC91	uc001rio.2	chr12	28332209	28703098
no Peak	CCDC93	uc002tlj.2	chr2	118673148	118771697
no Peak	CCDC94	uc002lzv.3	chr19	4247110	4269083
no Peak	CCDC96	uc003gjv.2	chr4	7042575	7044728
no Peak	CCDC99	uc003mae.3	chr5	169010637	169031779
no Peak	CCNB1IP1	uc001vwz.2	chr14	20779529	20801457
no Peak	CCNB2	uc002afz.2	chr15	59397319	59417243
no Peak	CCNI	uc003hkm.2	chr4	77969178	77997125
no Peak	CCNL1	uc003fbd.1	chr3	156864296	156878482
no Peak	CCNT2	uc010zbf.1	chr2	135676392	135714584
no Peak	CCNYL1	uc002vch.2	chr2	208576263	208620894
no Peak	CCNY	uc001iyu.3	chr10	35535952	35860845
no Peak	CCRN4L	uc003ihl.2	chr4	139936942	139967091
no Peak	CCT4	uc010ypr.1	chr2	62095262	62115791
no Peak	CCT5	uc003jeq.2	chr5	10250281	10266500
no Peak	CD163L1	uc001qsy.2	chr12	7507558	7596749
no Peak	CD164	uc003ptd.2	chr6	109687717	109703762
no Peak	CD2AP	uc003oyw.2	chr6	47445524	47594994
no Peak	CD2BP2	uc002dxs.2	chr16	30362087	30366682
no Peak	CD300LG	uc002iem.2	chr17	41924546	41940994
no Peak	CD46	uc001hgc.2	chr1	207925401	207968857
no Peak	CD58	uc001egm.2	chr1	117057156	117113715
no Peak	CD59	uc001mut.3	chr11	33724557	33758025
no Peak	CD9	uc001qnp.1	chr12	6308872	6347427
no Peak	CDC25C	uc011cyp.1	chr5	137620958	137674044
no Peak	CDC27	uc002ile.3	chr17	45195312	45266665
no Peak	CDC42	uc001bfq.2	chr1	22379119	22419435
no Peak	CDC5L	uc003oxl.2	chr6	44355301	44414779
no Peak	CDC6	uc002huj.1	chr17	38444145	38459413
no Peak	CDC73	uc001gtb.2	chr1	193091087	193223940
no Peak	CDCA7	uc002uic.1	chr2	174219560	174233718
no Peak	CDH1	uc002ewg.1	chr16	68771194	68869444
no Peak	CDH3	uc002ewf.2	chr16	68678150	68732957
no Peak	CDKAL1	uc003nde.1	chr6	20534687	21232632
no Peak	CDKN2AIP	uc003ivp.1	chr4	184365788	184369049
no Peak	CDR2L	uc002jml.3	chr17	72983726	73001889
no Peak	CDR2	uc002dkn.2	chr16	22357258	22385938
no Peak	CDS1	uc011ccv.1	chr4	85504056	85572492
no Peak	CDYL2	uc002ffs.2	chr16	80637677	80838175
no Peak	CDYL	uc003mwi.2	chr6	4706392	4955777
no Peak	CEBPA	uc002nun.2	chr19	33790841	33793430
no Peak	CEBPB	uc002xvi.1	chr20	48807375	48809212
no Peak	CECR5	uc002zmh.2	chr22	17618410	17646177
no Peak	CELSR1	uc003bhw.1	chr22	46756730	46933067
no Peak	CELSR3	uc003cuf.1	chr3	48662830	48709981
no Peak	CENPA	uc002rht.2	chr2	27008881	27023932
no Peak	CENPH	uc003jvp.2	chr5	68485374	68506183
no Peak	CENPK	uc003jts.2	chr5	64813593	64858995
no Peak	CENPQ	uc003ozh.1	chr6	49431095	49460820
no Peak	CENPV	uc002gpw.2	chr17	16245848	16256812
no Peak	CEP110	uc004bkw.2	chr9	123837241	123876002
no Peak	CEP250	uc002xcm.2	chr20	34043149	34099802
no Peak	CEP350	uc001gnt.2	chr1	179923907	180084014
no Peak	CEP63	uc003eqm.2	chr3	134204574	134293852
no Peak	CEP70	uc003esl.2	chr3	138213188	138313129
no Peak	CEP78	uc004aky.3	chr9	80850990	80881982
no Peak	CERCAM	uc010mxz.2	chr9	131182465	131199627
no Peak	CETN3	uc003kjo.2	chr5	89689530	89705603
no Peak	CFDP1	uc002fdz.2	chr16	75327608	75467387
no Peak	CGGBP1	uc003dqu.2	chr3	88101105	88199035
no Peak	CHAF1B	uc002yvj.2	chr21	37757688	37789124
no Peak	CHCHD3	uc010lmi.2	chr7	132469623	132766828
no Peak	CHCHD4	uc003byi.3	chr3	14153577	14166371
no Peak	CHCHD7	uc003xss.2	chr8	57124314	57131174
no Peak	CHCHD8	uc001ouj.2	chr11	73583713	73587890
no Peak	CHD9	uc002egy.2	chr16	53088944	53361413
no Peak	CHDH	uc003dgz.2	chr3	53850387	53880419
no Peak	CHRAC1	uc003yvl.2	chr8	141521400	141527252
no Peak	CHRM3	uc001hyo.1	chr1	239549864	240049896
no Peak	CHST10	uc002tam.2	chr2	101008322	101034091
no Peak	CHST15	uc001lhn.2	chr10	125767185	125853206
no Peak	CHST8	uc002nus.3	chr19	34112860	34264413
no Peak	CHSY1	uc002bwt.1	chr15	101715931	101792126
no Peak	CIAPIN1	uc002ell.1	chr16	57462086	57481369
no Peak	CIRH1A	uc002ews.3	chr16	69166498	69202936
no Peak	CITED4	uc001cgj.2	chr1	41326728	41328018
no Peak	CKAP2	uc001vgu.2	chr13	53029494	53050763
no Peak	CKAP5	uc001ndi.1	chr11	46765083	46867843
no Peak	CKB	uc001ynf.1	chr14	103985995	103989170
no Peak	CLDN14	uc002yvo.1	chr21	37832919	37948867
no Peak	CLDND1	uc003dso.2	chr3	98225320	98240281
no Peak	CLEC16A	uc002dao.2	chr16	11038344	11276044
no Peak	CLIC4	uc001bjo.2	chr1	25071759	25170815
no Peak	CLIP1	uc001uch.1	chr12	122755980	122907116
no Peak	CLK3	uc010ulm.1	chr15	74907334	74914557
no Peak	CLK4	uc003mjg.1	chr5	178029664	178054054
no Peak	CLN8	uc003wpo.3	chr8	1711869	1734735
no Peak	CLNS1A	uc001oyk.2	chr11	77327196	77348851
no Peak	CLSTN2	uc003etn.2	chr3	139654026	140286917
no Peak	CLTA	uc003zzf.1	chr9	36190891	36304778
no Peak	CMBL	uc003jes.2	chr5	10277707	10308168
no Peak	CMIP	uc002fgp.2	chr16	81478774	81745365
no Peak	CNBP	uc003elq.3	chr3	128886658	128902810
no Peak	CNOT2	uc001svv.2	chr12	70636776	70748772
no Peak	CNOT4	uc011kpz.1	chr7	135046552	135194851
no Peak	CNOT6L	uc003hks.2	chr4	78634541	78740544
no Peak	CNOT6	uc003mlx.2	chr5	179921416	180005352
no Peak	CNOT7	uc003wxg.1	chr8	17086739	17104387
no Peak	CNOT8	uc003lvu.2	chr5	154237808	154256351
no Peak	CNO	uc003gjp.1	chr4	6717841	6719387
no Peak	CNPY2	uc001sku.1	chr12	56704216	56710120
no Peak	COBL	uc003tps.2	chr7	51083909	51384515
no Peak	COG2	uc010pwc.1	chr1	230778201	230829730
no Peak	COG3	uc001vak.2	chr13	46039070	46110759
no Peak	COIL	uc002iuu.2	chr17	55015562	55038411
no Peak	COL1A1	uc002iqm.2	chr17	48261458	48279000
no Peak	COL4A3BP	uc003kdt.2	chr5	74666928	74807806
no Peak	COMMD10	uc003krt.1	chr5	115420726	115628978
no Peak	COMMD5	uc003zeo.3	chr8	146075551	146079029
no Peak	COMMD7	uc002wya.3	chr20	31290493	31331814
no Peak	COPA	uc009wti.2	chr1	160258377	160313354
no Peak	COPB1	uc001mlh.2	chr11	14479048	14521441
no Peak	COPE	uc002nkn.2	chr19	19010323	19030199
no Peak	COPS4	uc003hob.2	chr4	83956238	83996970
no Peak	COPS5	uc003xxf.2	chr8	67955317	67974571
no Peak	COQ10B	uc002uuh.1	chr2	198318230	198339851
no Peak	COQ2	uc011ccp.1	chr4	84182688	84205964
no Peak	COQ5	uc001tyo.2	chr12	120941082	120966964
no Peak	COQ7	uc002dfr.2	chr16	19078926	19091350
no Peak	COQ9	uc010vho.1	chr16	57481401	57491324
no Peak	CORO1C	uc001tnj.2	chr12	109038888	109125295
no Peak	COX10	uc002gof.3	chr17	13972718	14111992
no Peak	COX16	uc001xmb.2	chr14	70791798	70826444
no Peak	COX17	uc003ecz.1	chr3	119388371	119396243
no Peak	COX18	uc003hgm.1	chr4	73920415	73935472
no Peak	COX4I1	uc002fje.2	chr16	85833195	85840605
no Peak	COX5B	uc002sya.2	chr2	98262520	98264656
no Peak	COX7A2L	uc002rsl.2	chr2	42577646	42596150
no Peak	COX7A2	uc003phv.1	chr6	75947502	75953525
no Peak	COX7C	uc003kir.2	chr5	85913783	85916581
no Peak	CPD	uc002hfb.1	chr17	28705983	28795699
no Peak	CPEB2	uc003gnk.1	chr4	15005521	15071774
no Peak	CPEB3	uc001khw.1	chr10	93808398	94050844
no Peak	CPEB4	uc003mcs.3	chr5	173315330	173387312
no Peak	CPE	uc003irg.3	chr4	166300096	166419481
no Peak	CPNE3	uc003ydv.2	chr8	87526655	87573726
no Peak	CPSF1	uc003zcl.1	chr8	145630337	145634733
no Peak	CPSF2	uc001yah.1	chr14	92588328	92630543
no Peak	CPSF3	uc010ewx.1	chr2	9563867	9599747
no Peak	CPT1A	uc001oof.3	chr11	68522090	68609399
no Peak	CRABP2	uc001fpr.2	chr1	156669409	156675375
no Peak	CRADD	uc010sus.1	chr12	94071150	94288616
no Peak	CRAT	uc004bxk.3	chr9	131857074	131873070
no Peak	CRBN	uc011aso.1	chr3	3196430	3221390
no Peak	CRCP	uc003tuv.2	chr7	65579804	65619551
no Peak	CREBBP	uc002cvv.2	chr16	3775057	3930121
no Peak	CRELD2	uc010hal.2	chr22	50312282	50321186
no Peak	CREM	uc001iya.2	chr10	35415800	35501885
no Peak	CRISPLD2	uc010voh.1	chr16	84853586	84943116
no Peak	CRK	uc002fsm.2	chr17	1325459	1359544
no Peak	CRTC3	uc002bpo.2	chr15	91073197	91188576
no Peak	CRY1	uc001tmi.3	chr12	107385142	107487598
no Peak	CRYL1	uc001unf.2	chr13	20977808	21100012
no Peak	CRYM	uc002dim.2	chr16	21269842	21314417
no Peak	CSDA	uc001qyt.2	chr12	10851677	10875953
no Peak	CSE1L	uc002xty.2	chr20	47662837	47713484
no Peak	CSGALNACT2	uc001jan.2	chr10	43633933	43680747
no Peak	CSNK1E	uc003avk.2	chr22	38686697	38714089
no Peak	CSNK2A1	uc002wdw.1	chr20	463337	524482
no Peak	CSRP2BP	uc002wqj.2	chr20	18118526	18169015
no Peak	CSRP2	uc001syl.1	chr12	77252495	77272799
no Peak	CST3	uc002wtm.2	chr20	23608535	23618574
no Peak	CSTB	uc002zdr.2	chr21	45193831	45196259
no Peak	CSTF1	uc002xxl.1	chr20	54967426	54979582
no Peak	CTAGE5	uc001wuz.3	chr14	39734475	39820395
no Peak	CTDSPL2	uc001ztr.2	chr15	44719578	44819427
no Peak	CTF1	uc002dzw.2	chr16	30907927	30914880
no Peak	CTNNB1	uc011azf.1	chr3	41240941	41281939
no Peak	CTNNBIP1	uc001aqk.1	chr1	9908333	9970316
no Peak	CTNNBL1	uc010zvw.1	chr20	36322433	36500519
no Peak	CTNND1	uc001nmc.3	chr11	57529233	57586651
no Peak	CTR9	uc001mja.2	chr11	10772810	10801291
no Peak	CTSH	uc002ben.2	chr15	79214091	79237420
no Peak	CTSL2	uc004awu.2	chr9	99794939	99822167
no Peak	CTTN	uc001opv.3	chr11	70244611	70282689
no Peak	CUL1	uc010lpg.2	chr7	148395005	148498201
no Peak	CUL3	uc002vny.2	chr2	225334868	225450110
no Peak	CUL4A	uc010tjx.1	chr13	113863085	113919391
no Peak	CUL4B	uc004esw.2	chrX	119658447	119709684
no Peak	CUL5	uc001pjv.2	chr11	107879407	107978484
no Peak	CUTC	uc001kqd.3	chr10	101491957	101515893
no Peak	CWF19L1	uc001kqq.1	chr10	101992054	102027437
no Peak	CXorf40A	uc004fde.1	chrX	148622532	148632055
no Peak	CYB561D1	uc010ovm.1	chr1	110036657	110043062
no Peak	CYB561	uc002jat.2	chr17	61509665	61523722
no Peak	CYB5D1	uc002gjb.3	chr17	7761063	7765598
no Peak	CYB5R4	uc003pkf.2	chr6	84569369	84670144
no Peak	CYBA	uc002flb.2	chr16	88709697	88717457
no Peak	CYCS	uc003sxl.2	chr7	25158276	25164955
no Peak	CYHR1	uc003zcv.2	chr8	145675314	145690479
no Peak	CYP2J2	uc001czq.2	chr1	60358980	60392423
no Peak	CYP2R1	uc001mlr.2	chr11	14899557	14913751
no Peak	CYP2U1	uc011cfi.1	chr4	108852716	108874611
no Peak	DAB1	uc001cyt.1	chr1	57463578	59012446
no Peak	DAB2IP	uc004bln.2	chr9	124329398	124547807
no Peak	DAD1	uc001wgl.2	chr14	23033806	23058143
no Peak	DAP3	uc001fls.2	chr1	155658873	155708317
no Peak	DAPK2	uc002amr.2	chr15	64199235	64338521
no Peak	DAP	uc003jez.3	chr5	10679342	10761387
no Peak	DBF4B	uc010wjc.1	chr17	42785975	42829631
no Peak	DBF4	uc003ujf.1	chr7	87505543	87538856
no Peak	DBI	uc010yyh.1	chr2	120124503	120130120
no Peak	DBP	uc010elz.1	chr19	49136342	49140639
no Peak	DBR1	uc003erv.2	chr3	137879852	137893773
no Peak	DBT	uc010oug.1	chr1	100652478	100715409
no Peak	DCAF16	uc003gpn.2	chr4	17802279	17812381
no Peak	DCK	uc003hfx.2	chr4	71859264	71896627
no Peak	DCLRE1A	uc001law.2	chr10	115594483	115613859
no Peak	DCLRE1B	uc001eeg.2	chr1	114448037	114456692
no Peak	DCTD	uc003ivf.2	chr4	183811244	183838630
no Peak	DCTN4	uc010jhi.2	chr5	150088309	150138657
no Peak	DCTN5	uc002dly.1	chr16	23652806	23681182
no Peak	DCTN6	uc003xhy.2	chr8	30013812	30041059
no Peak	DCUN1D4	uc011bzn.1	chr4	52709275	52783001
no Peak	DDB1	uc001nrc.3	chr11	61066919	61100666
no Peak	DDHD1	uc001xai.2	chr14	53503458	53620046
no Peak	DDN	uc001rsv.1	chr12	49388932	49393088
no Peak	DDX10	uc001pkm.2	chr11	108535815	108811646
no Peak	DDX1	uc002rce.2	chr2	15731769	15771224
no Peak	DDX20	uc001ebs.2	chr1	112298189	112310198
no Peak	DDX26B	uc004eyw.3	chrX	134654554	134716459
no Peak	DDX28	uc002evh.1	chr16	68055173	68057959
no Peak	DDX31	uc004cbq.1	chr9	135469675	135545788
no Peak	DDX3X	uc004dfg.2	chrX	41192650	41223724
no Peak	DDX46	uc003kzw.2	chr5	134094460	134166809
no Peak	DDX47	uc001rav.2	chr12	12878850	12982909
no Peak	DDX51	uc001ujy.3	chr12	132621141	132628880
no Peak	DDX52	uc002hoh.1	chr17	35972412	36003487
no Peak	DDX59	uc010ppl.1	chr1	200610118	200639126
no Peak	DDX6	uc001puc.2	chr11	118618472	118661972
no Peak	DECR1	uc011lgc.1	chr8	91013579	91064227
no Peak	DEF6	uc010jvs.2	chr6	35265594	35289546
no Peak	DEGS1	uc001hoi.2	chr1	224363457	224381140
no Peak	DENND1B	uc010ppe.1	chr1	197479508	197744623
no Peak	DENND2C	uc001eez.2	chr1	115064017	115213044
no Peak	DENND3	uc003yvy.2	chr8	142138719	142205898
no Peak	DEPDC1B	uc003jsh.2	chr5	59892739	59995993
no Peak	DERA	uc001rde.2	chr12	16064185	16190314
no Peak	DERL2	uc002gcc.1	chr17	5377612	5389494
no Peak	DFFA	uc001arj.2	chr1	10520604	10532613
no Peak	DFNB31	uc004biz.3	chr9	117164360	117267730
no Peak	DGCR14	uc002zou.2	chr22	19117792	19132190
no Peak	DGCR2	uc002zor.1	chr22	19023794	19109967
no Peak	DGKZ	uc001nci.1	chr11	46366986	46390725
no Peak	DGUOK	uc002sjx.2	chr2	74153952	74186086
no Peak	DHCR7	uc001oqk.2	chr11	71145458	71159477
no Peak	DHODH	uc002fbp.2	chr16	72042642	72058954
no Peak	DHRS12	uc001vfq.2	chr13	52342130	52378293
no Peak	DHRS1	uc001wok.2	chr14	24759805	24769039
no Peak	DHRS7B	uc002gyo.2	chr17	21030257	21094835
no Peak	DHTKD1	uc001ild.3	chr10	12110933	12165223
no Peak	DHX15	uc003gqx.2	chr4	24529088	24586184
no Peak	DHX29	uc003jpx.2	chr5	54552073	54603521
no Peak	DHX33	uc002gca.2	chr17	5345593	5372181
no Peak	DHX34	uc010xyn.1	chr19	47852545	47885961
no Peak	DHX35	uc002xjh.2	chr20	37590999	37668363
no Peak	DHX36	uc010hvq.2	chr3	153993457	154042286
no Peak	DHX40	uc002ixn.1	chr17	57642885	57685702
no Peak	DHX57	uc002rrf.2	chr2	39024877	39103021
no Peak	DIDO1	uc002yds.1	chr20	61509089	61569274
no Peak	DIRC3	uc002vgo.2	chr2	218148747	218621316
no Peak	DISC1	uc001huz.2	chr1	231762560	232177016
no Peak	DKK1	uc001jjr.2	chr10	54074040	54077416
no Peak	DLC1	uc003wwm.2	chr8	12940871	13372429
no Peak	DLG1	uc010ial.2	chr3	196769431	197026143
no Peak	DLG4	uc002get.3	chr17	7093211	7123369
no Peak	DLG5	uc001jzk.2	chr10	79550550	79686348
no Peak	DLGAP3	uc001byc.2	chr1	35331037	35370984
no Peak	DLGAP5	uc001xbt.2	chr14	55614835	55658396
no Peak	DLL1	uc003qxm.2	chr6	170591295	170599697
no Peak	DLL4	uc001zng.1	chr15	41221546	41231237
no Peak	DLX1	uc002uhl.2	chr2	172950207	172954399
no Peak	DLX2	uc002uhn.2	chr2	172964166	172967478
no Peak	DMXL1	uc010jcl.1	chr5	118407083	118584822
no Peak	DNAJB11	uc003fqi.2	chr3	186287951	186303588
no Peak	DNAJB14	uc003hvl.2	chr4	100820711	100867879
no Peak	DNAJB9	uc003vfn.2	chr7	108210355	108215292
no Peak	DNAJC13	uc010htq.1	chr3	132136552	132186189
no Peak	DNAJC15	uc001uyy.2	chr13	43597361	43683304
no Peak	DNAJC19	uc003fkt.2	chr3	180701502	180707530
no Peak	DNAJC22	uc001rub.2	chr12	49741040	49745683
no Peak	DNAJC30	uc003tys.1	chr7	73095247	73097781
no Peak	DNAJC3	uc001vmq.2	chr13	96329401	96447241
no Peak	DNMT1	uc010xlc.1	chr19	10244022	10305755
no Peak	DNMT3B	uc002wyc.2	chr20	31350190	31397161
no Peak	DNPEP	uc010zlf.1	chr2	220233072	220250253
no Peak	DNTTIP2	uc001dqf.2	chr1	94335337	94344742
no Peak	DOCK8	uc003zgf.2	chr9	214864	465259
no Peak	DOHH	uc010xhl.1	chr19	3490819	3500938
no Peak	DPH3	uc003cau.2	chr3	16298568	16306496
no Peak	DPH5	uc001dtz.2	chr1	101455179	101491644
no Peak	DPM1	uc002xvw.1	chr20	49551404	49575060
no Peak	DPM2	uc004bsv.2	chr9	130697373	130700763
no Peak	DPP9	uc002mba.2	chr19	4675245	4723855
no Peak	DPY19L3	uc002ntg.2	chr19	32896676	32975236
no Peak	DPY19L4	uc003ygx.2	chr8	95732102	95806076
no Peak	DRAP1	uc001ogj.1	chr11	65686727	65689031
no Peak	DSCAM	uc002yyq.1	chr21	41384342	42219039
no Peak	DSCR8	uc002ywt.3	chr21	39493544	39528604
no Peak	DST	uc003pdf.2	chr6	56322786	56819413
no Peak	DSTYK	uc001hbw.2	chr1	205111631	205180727
no Peak	DTD1	uc002wrf.3	chr20	18568555	18744558
no Peak	DTWD1	uc001zxp.3	chr15	49913225	49922154
no Peak	DUS1L	uc010wvi.1	chr17	80019084	80022945
no Peak	DUS2L	uc002evi.2	chr16	68057203	68113183
no Peak	DUSP10	uc001hmy.1	chr1	221874765	221915461
no Peak	DUSP11	uc002sjp.2	chr2	73989325	74007284
no Peak	DUSP12	uc001gbo.2	chr1	161719580	161726951
no Peak	DUSP22	uc003msx.2	chr6	292100	351353
no Peak	DUSP28	uc002vzg.2	chr2	241499470	241503430
no Peak	DUSP4	uc003xhm.2	chr8	29193616	29208185
no Peak	DUT	uc001zws.2	chr15	48623620	48635568
no Peak	DYNC1LI1	uc003cfb.3	chr3	32567468	32612350
no Peak	DYNC1LI2	uc002eqb.1	chr16	66754798	66785525
no Peak	DYNLL1	uc001tyj.2	chr12	120907659	120936297
no Peak	DYNLL2	uc010wnn.1	chr17	56160779	56167618
no Peak	DYRK1A	uc002ywi.2	chr21	38739858	38887678
no Peak	DYRK1B	uc002oml.2	chr19	40320846	40324841
no Peak	DYRK2	uc001str.3	chr12	68042511	68056443
no Peak	DZIP3	uc003dxd.2	chr3	108308336	108413692
no Peak	E2F3	uc003nda.2	chr6	20402136	20493945
no Peak	E2F6	uc002rbe.2	chr2	11584501	11606297
no Peak	E2F7	uc001syn.2	chr12	77439401	77459360
no Peak	E2F8	uc001mpn.3	chr11	19245617	19263167
no Peak	EAF1	uc003bzu.2	chr3	15469063	15484119
no Peak	EAF2	uc003een.2	chr3	121554033	121605372
no Peak	EBAG9	uc003ynf.2	chr8	110551928	110577389
no Peak	EBNA1BP2	uc001cio.2	chr1	43629845	43736607
no Peak	ECH1	uc002oji.2	chr19	39306063	39322497
no Peak	ECHS1	uc001lmu.2	chr10	135175987	135186908
no Peak	EDEM1	uc003bqi.2	chr3	5229358	5261649
no Peak	EDEM3	uc010pol.1	chr1	184659626	184724041
no Peak	EDN2	uc001cgx.2	chr1	41944448	41950344
no Peak	EED	uc001pbr.2	chr11	85955814	85989778
no Peak	EEF1E1	uc011dic.1	chr6	8073594	8102828
no Peak	EEF1G	uc010rlw.1	chr11	62327072	62342401
no Peak	EEF2K	uc002dki.2	chr16	22217591	22300065
no Peak	EEFSEC	uc003eki.2	chr3	127872312	128127488
no Peak	EFCAB6	uc003bdy.1	chr22	43924653	44208118
no Peak	EFEMP1	uc002rzi.2	chr2	56093102	56150932
no Peak	EFHA1	uc001uof.2	chr13	22066839	22178307
no Peak	EFNA5	uc003kol.2	chr5	106712590	107006596
no Peak	EFNB1	uc004dxe.2	chrX	68048839	68066029
no Peak	EFNB2	uc001vqi.2	chr13	107142097	107187337
no Peak	EFR3A	uc003yte.2	chr8	132916358	133025769
no Peak	EGLN1	uc001huv.2	chr1	231499496	231560790
no Peak	EGLN3	uc001wrz.2	chr14	34393422	34420284
no Peak	EHD1	uc001obv.1	chr11	64620207	64647149
no Peak	EHD4	uc001zot.2	chr15	42191640	42264755
no Peak	EHMT1	uc004cob.1	chr9	140513443	140686705
no Peak	EIF1AD	uc001ogn.1	chr11	65764016	65769588
no Peak	EIF1B	uc003ckc.2	chr3	40351172	40353913
no Peak	EIF2B1	uc010tat.1	chr12	124111247	124118247
no Peak	EIF2B3	uc001cmt.1	chr1	45316449	45452282
no Peak	EIF2B5	uc003fmp.2	chr3	183852809	183863098
no Peak	EIF2C2	uc003yvn.2	chr8	141541264	141645645
no Peak	EIF2C3	uc001bzp.2	chr1	36396771	36522062
no Peak	EIF2S2	uc002xaf.2	chr20	32676116	32700085
no Peak	EIF2S3	uc004dbc.2	chrX	24073064	24096925
no Peak	EIF3D	uc003apr.2	chr22	36906897	36925277
no Peak	EIF3H	uc003yob.2	chr8	117657055	117778494
no Peak	EIF4E2	uc002vta.2	chr2	233415356	233433919
no Peak	EIF4ENIF1	uc003alc.1	chr22	31864160	31885923
no Peak	EIF4E	uc011ceb.1	chr4	99799606	99851786
no Peak	EIF4G2	uc001mjf.1	chr11	10822508	10829631
no Peak	EIF5A2	uc003fhd.2	chr3	170606204	170626426
no Peak	ELAVL1	uc002mjb.2	chr19	8023457	8070529
no Peak	ELF2	uc003ihq.2	chr4	140022744	140098372
no Peak	ELK3	uc001teo.1	chr12	96588206	96661606
no Peak	ELK4	uc001hcy.1	chr1	205585234	205602000
no Peak	ELL2	uc003klr.3	chr5	95220803	95297775
no Peak	ELL	uc010ebq.2	chr19	18553474	18632937
no Peak	ELOVL2	uc003mzp.3	chr6	10980994	11044624
no Peak	ELOVL6	uc003iaa.2	chr4	110970229	111119820
no Peak	ELOVL7	uc003jsj.3	chr5	60047616	60140101
no Peak	ELP2	uc010xcg.1	chr18	33709886	33754607
no Peak	ELP3	uc003xgn.3	chr8	27947748	28048667
no Peak	EMID2	uc010lhy.1	chr7	101006121	101202304
no Peak	EML1	uc010tww.1	chr14	100239935	100408393
no Peak	EML4	uc002rsi.2	chr2	42396489	42559686
no Peak	EN2	uc003wmb.2	chr7	155250823	155257520
no Peak	ENAH	uc001hpc.1	chr1	225674533	225840845
no Peak	ENC1	uc003kdc.3	chr5	73923234	73937249
no Peak	ENOPH1	uc003hmv.2	chr4	83351725	83382243
no Peak	ENOX2	uc004evw.2	chrX	129757358	130037208
no Peak	ENTPD5	uc010tuo.1	chr14	74433182	74486026
no Peak	ENY2	uc003ync.2	chr8	110346575	110355910
no Peak	EPB41L4A	uc003kpp.1	chr5	111478137	111564411
no Peak	EPB41L5	uc002tmg.2	chr2	120770668	120936694
no Peak	EPC1	uc001iwi.3	chr10	32557858	32667667
no Peak	EPC2	uc010zbt.1	chr2	149402559	149545135
no Peak	EPCAM	uc002rvw.2	chr2	47572296	47614165
no Peak	EPHA2	uc001aya.1	chr1	16450831	16482564
no Peak	EPHA4	uc002vmq.2	chr2	222282748	222437010
no Peak	EPHB4	uc011kkf.1	chr7	100411540	100425143
no Peak	EPN1	uc002qlw.2	chr19	56186560	56207132
no Peak	EPN2	uc010cql.1	chr17	19140689	19235381
no Peak	EPS15	uc001csq.1	chr1	51819934	51984995
no Peak	EPS8L3	uc001dys.1	chr1	110292701	110306564
no Peak	EPS8	uc001rdb.2	chr12	15773075	15942510
no Peak	ERBB2IP	uc003juk.1	chr5	65222383	65376850
no Peak	ERCC3	uc002toh.1	chr2	128014865	128051752
no Peak	ERCC4	uc002dce.2	chr16	14014013	14046205
no Peak	ERCC6	uc001jhs.3	chr10	50664491	50747147
no Peak	ERH	uc001xlc.2	chr14	69846839	69865021
no Peak	ERI1	uc003wsk.2	chr8	8860313	8890849
no Peak	ERICH1	uc011kwh.1	chr8	564748	681226
no Peak	ERRFI1	uc001aoz.2	chr1	8071779	8086393
no Peak	ESD	uc001vbn.2	chr13	47345391	47371367
no Peak	ESF1	uc002woj.2	chr20	13694969	13765532
no Peak	ESRP1	uc003ygq.3	chr8	95653363	95719692
no Peak	ESYT1	uc001sjq.2	chr12	56522053	56538452
no Peak	ESYT2	uc003wod.1	chr7	158540884	158622319
no Peak	ETNK1	uc009ziz.2	chr12	22778075	22843607
no Peak	ETS2	uc002yxf.2	chr21	40177230	40196876
no Peak	ETV3	uc001fqr.2	chr1	157094458	157108383
no Peak	ETV6	uc001qzz.2	chr12	11802787	12048323
no Peak	EWSR1	uc003aes.3	chr22	29663997	29686670
no Peak	EXD2	uc001xkt.2	chr14	69658245	69709071
no Peak	EXO1	uc001hzh.2	chr1	242011534	242053047
no Peak	EXOC5	uc001xct.2	chr14	57669195	57735617
no Peak	EXOC8	uc001huq.2	chr1	231468482	231473578
no Peak	EXOSC10	uc001asa.2	chr1	11126677	11159938
no Peak	EXOSC2	uc004bzu.2	chr9	133569157	133580452
no Peak	EXOSC6	uc002eym.1	chr16	70284133	70285833
no Peak	EXT1	uc003yok.1	chr8	118811601	119124058
no Peak	EXT2	uc010rfo.1	chr11	44097075	44266979
no Peak	EZH2	uc011kui.1	chr7	148513775	148581414
no Peak	F8	uc011mzx.1	chrX	154221210	154255215
no Peak	FABP5	uc003yca.1	chr8	82192784	82197008
no Peak	FADD	uc001opm.2	chr11	70049268	70053508
no Peak	FADS1	uc010rlm.1	chr11	61567102	61584529
no Peak	FADS2	uc001nsj.2	chr11	61583727	61634825
no Peak	FADS3	uc001nsn.2	chr11	61640998	61659422
no Peak	FAF2	uc003mej.3	chr5	175875355	175937074
no Peak	FAIM	uc003esp.2	chr3	138327541	138352211
no Peak	FAM102B	uc010ouy.1	chr1	109102970	109181948
no Peak	FAM105A	uc003jfj.2	chr5	14581890	14616285
no Peak	FAM105B	uc003jfk.2	chr5	14664782	14699841
no Peak	FAM107B	uc010qbu.1	chr10	14560558	14816896
no Peak	FAM108B1	uc004ail.2	chr9	74477369	74526148
no Peak	FAM108C1	uc002bfu.2	chr15	80987651	81047960
no Peak	FAM110C	uc010yim.1	chr2	41608	46385
no Peak	FAM111A	uc010rkp.1	chr11	58910317	58922509
no Peak	FAM111B	uc001nnl.2	chr11	58874657	58894886
no Peak	FAM114A1	uc003gtn.2	chr4	38869436	38945424
no Peak	FAM114A2	uc003lvd.2	chr5	153371270	153418497
no Peak	FAM116A	uc003dja.2	chr3	57611181	57678816
no Peak	FAM120B	uc003qxp.2	chr6	170615843	170714236
no Peak	FAM127B	uc004eyg.3	chrX	134184966	134186221
no Peak	FAM160A1	uc003imj.2	chr4	152330397	152584784
no Peak	FAM160B1	uc001lcc.2	chr10	116581502	116659585
no Peak	FAM164A	uc003ybd.2	chr8	79578281	79631995
no Peak	FAM168A	uc001otz.1	chr11	73117027	73309228
no Peak	FAM173B	uc003jep.2	chr5	10226437	10250014
no Peak	FAM174B	uc002bsl.3	chr15	93160680	93277304
no Peak	FAM192A	uc002ekw.3	chr16	57186381	57219976
no Peak	FAM195B	uc002kjd.2	chr17	79780292	79791167
no Peak	FAM20B	uc001gmc.2	chr1	178995073	179045701
no Peak	FAM32A	uc002ndt.2	chr19	16296234	16302855
no Peak	FAM35A	uc001kei.3	chr10	88854952	88951220
no Peak	FAM3C	uc003vjx.2	chr7	120988906	121036422
no Peak	FAM40A	uc001dyz.1	chr1	110574198	110597424
no Peak	FAM43A	uc003fuj.2	chr3	194406621	194409764
no Peak	FAM46A	uc003pjg.2	chr6	82455447	82462428
no Peak	FAM46B	uc010ofj.1	chr1	27331512	27339333
no Peak	FAM46C	uc001ehe.2	chr1	118148603	118171010
no Peak	FAM54A	uc003qgu.1	chr6	136552167	136571449
no Peak	FAM71A	uc001hjk.2	chr1	212797815	212800114
no Peak	FAM76B	uc001pfm.2	chr11	95502105	95522954
no Peak	FAM82A2	uc001zmq.1	chr15	41028085	41048049
no Peak	FAM82B	uc003ydu.2	chr8	87484578	87521009
no Peak	FAM83D	uc002xjf.2	chr20	37554954	37574840
no Peak	FAM91A1	uc011lik.1	chr8	124780881	124822719
no Peak	FAM96A	uc002amt.1	chr15	64364760	64386207
no Peak	FANCA	uc002fow.1	chr16	89864766	89883065
no Peak	FANCC	uc004avi.3	chr9	97872799	98079991
no Peak	FANCF	uc001mql.1	chr11	22644078	22647387
no Peak	FANCG	uc011lot.1	chr9	35075461	35079898
no Peak	FAR1	uc001mld.2	chr11	13690205	13753891
no Peak	FAR2	uc001ris.3	chr12	29302231	29487005
no Peak	FARS2	uc010jnv.1	chr6	5261276	5771816
no Peak	FASTKD2	uc002vbu.2	chr2	207630111	207660909
no Peak	FASTKD3	uc003jeb.2	chr5	7859272	7869115
no Peak	FBL	uc010egr.2	chr19	40328905	40337054
no Peak	FBP1	uc010mrl.2	chr9	97365422	97402531
no Peak	FBRSL1	uc001ukf.2	chr12	133067156	133161771
no Peak	FBRS	uc002dzc.3	chr16	30671242	30682130
no Peak	FBXL12	uc002mmh.2	chr19	9920944	9938492
no Peak	FBXL14	uc001qjh.2	chr12	1675159	1703331
no Peak	FBXL17	uc011cvc.1	chr5	107194739	107717799
no Peak	FBXL18	uc003son.3	chr7	5515428	5553399
no Peak	FBXL5	uc003gob.1	chr4	15606153	15657013
no Peak	FBXO18	uc001iir.2	chr10	5931534	5979555
no Peak	FBXO21	uc001twj.2	chr12	117581585	117628300
no Peak	FBXO27	uc002okh.2	chr19	39514663	39523198
no Peak	FBXO33	uc001wvk.2	chr14	39866877	39901704
no Peak	FBXO36	uc010fxi.1	chr2	230787206	230948016
no Peak	FBXO45	uc010iai.2	chr3	196295724	196315928
no Peak	FBXO46	uc002pcz.2	chr19	46213888	46234151
no Peak	FBXO4	uc003jmq.2	chr5	41925355	41941663
no Peak	FBXO5	uc003qph.2	chr6	153291659	153304740
no Peak	FBXO8	uc003itq.2	chr4	175157811	175205402
no Peak	FBXW11	uc003mbm.1	chr5	171288555	171433877
no Peak	FBXW2	uc004bkm.1	chr9	123519253	123555740
no Peak	FBXW7	uc003imt.2	chr4	153242410	153456316
no Peak	FBXW8	uc009zwp.1	chr12	117348760	117470180
no Peak	FCHO2	uc003kcl.2	chr5	72251807	72386348
no Peak	FCRLB	uc001gbh.2	chr1	161691333	161697932
no Peak	FDFT1	uc010lsa.1	chr8	11660189	11689179
no Peak	FECH	uc002lgp.3	chr18	55212073	55253969
no Peak	FEM1B	uc002arg.2	chr15	68570140	68583639
no Peak	FEM1C	uc003krb.1	chr5	114856607	114880591
no Peak	FERMT2	uc001xac.2	chr14	53323989	53417815
no Peak	FER	uc003kop.1	chr5	108083522	108523373
no Peak	FGD3	uc004asw.2	chr9	95709600	95798518
no Peak	FGF21	uc002pkn.1	chr19	49258815	49261582
no Peak	FGFR1OP2	uc001rhm.2	chr12	27091315	27118862
no Peak	FGGY	uc009wac.2	chr1	59762624	60228400
no Peak	FHL2	uc002tdd.2	chr2	105977284	106055230
no Peak	FH	uc001hyx.2	chr1	241660905	241683054
no Peak	FITM2	uc002xlr.1	chr20	42935196	42939889
no Peak	FIZ1	uc002qlj.3	chr19	56102737	56113336
no Peak	FJX1	uc001mwh.2	chr11	35639734	35642419
no Peak	FKBP5	uc003oky.2	chr6	35541361	35696397
no Peak	FKBP6	uc003twz.2	chr7	72440191	72772641
no Peak	FKRP	uc002pfn.2	chr19	47249302	47261832
no Peak	FLJ33630	uc003kuo.2	chr5	127276134	127419299
no Peak	FLJ35220	uc002jym.1	chr17	78388966	78411881
no Peak	FLJ90757	uc002jyy.2	chr17	79002932	79008519
no Peak	FLNA	uc004fkk.2	chrX	153576899	153603006
no Peak	FLNB	uc010hng.1	chr3	58135576	58139368
no Peak	FLRT2	uc001xvr.2	chr14	85996487	86094269
no Peak	FLT4	uc003mlz.3	chr5	180028506	180076624
no Peak	FLVCR1	uc001hjt.2	chr1	213031596	213070197
no Peak	FLYWCH2	uc002csa.2	chr16	2933195	2949382
no Peak	FN3KRP	uc010wvr.1	chr17	80674581	80685889
no Peak	FNDC3B	uc003fhy.2	chr3	171757417	172118490
no Peak	FOXC1	uc003mtp.2	chr6	1610680	1614127
no Peak	FOXD1	uc003kcp.2	chr5	72742086	72744352
no Peak	FOXK2	uc002kfn.2	chr17	80477593	80562481
no Peak	FOXN1	uc010crm.2	chr17	26833277	26865173
no Peak	FOXN3	uc001xxo.3	chr14	89622516	90085494
no Peak	FOXO1	uc001uxl.3	chr13	41129802	41240734
no Peak	FOXO3	uc003psk.2	chr6	108881025	109005971
no Peak	FOXP2	uc003vgu.2	chr7	113726381	114331092
no Peak	FOXRED2	uc003app.3	chr22	36883233	36903148
no Peak	FPGS	uc004bsf.1	chr9	130556875	130566692
no Peak	FRAT1	uc001knc.1	chr10	99079021	99081672
no Peak	FRAT2	uc001knd.1	chr10	99092253	99094458
no Peak	FRG1	uc003izs.2	chr4	190861973	190884358
no Peak	FRMD6	uc001wzb.2	chr14	51955854	52197442
no Peak	FRS2	uc001suy.2	chr12	69864128	69973561
no Peak	FRS3	uc003orc.1	chr6	41737913	41747630
no Peak	FRYL	uc003gyk.2	chr4	48552521	48782316
no Peak	FSCN1	uc003sou.2	chr7	5632453	5646285
no Peak	FSCN3	uc003vmc.1	chr7	127231462	127236057
no Peak	FTSJD1	uc002ezz.3	chr16	71316203	71323513
no Peak	FTSJD2	uc010jwu.2	chr6	37400906	37429878
no Peak	FUT2	uc002pke.3	chr19	49199227	49209190
no Peak	FUT5	uc010duo.2	chr19	5865837	5904025
no Peak	FUT8	uc001xin.2	chr14	65877839	66209961
no Peak	FXR1	uc003fkp.2	chr3	180630451	180694948
no Peak	FZD3	uc003xgx.2	chr8	28351772	28421959
no Peak	FZD5	uc002vcj.2	chr2	208627311	208634143
no Peak	FZD8	uc001iyz.1	chr10	35927176	35930362
no Peak	G3BP2	uc003his.2	chr4	76567954	76598667
no Peak	GAB1	uc003ijd.2	chr4	144257982	144395717
no Peak	GABPA	uc002ylx.3	chr21	27106880	27144770
no Peak	GABPB1	uc001zya.2	chr15	50569389	50647605
no Peak	GAD1	uc002ugi.2	chr2	171673199	171717657
no Peak	GADD45A	uc001ddz.1	chr1	68150882	68154019
no Peak	GADD45G	uc004aqq.2	chr9	92219926	92221467
no Peak	GAK	uc003gbm.3	chr4	843065	926174
no Peak	GALNS	uc002fma.2	chr16	88921536	88923374
no Peak	GALNT11	uc010lqg.1	chr7	151722777	151819427
no Peak	GALNT3	uc010fph.1	chr2	166604312	166650803
no Peak	GALNT6	uc001ryl.1	chr12	51745832	51785200
no Peak	GAL	uc001oob.2	chr11	68451982	68458642
no Peak	GANAB	uc001nua.2	chr11	62392299	62414104
no Peak	GAN	uc002fgo.2	chr16	81348570	81413801
no Peak	GAPVD1	uc004bpq.2	chr9	128024110	128127289
no Peak	GARS	uc003tbm.2	chr7	30634180	30673646
no Peak	GART	uc002yry.2	chr21	34876238	34915198
no Peak	GAS2L3	uc001thu.2	chr12	100967488	101018683
no Peak	GATA2	uc003eko.2	chr3	128198264	128212030
no Peak	GATA6	uc002ktt.1	chr18	19749415	19782227
no Peak	GATAD1	uc003ulx.1	chr7	92076764	92088742
no Peak	GBE1	uc003dqg.2	chr3	81538849	81810950
no Peak	GBF1	uc001kux.1	chr10	104005308	104142649
no Peak	GCA	uc002ucg.2	chr2	163200582	163219146
no Peak	GCC1	uc003vma.2	chr7	127220682	127225654
no Peak	GCH1	uc001xbh.1	chr14	55308723	55369542
no Peak	GCLC	uc003pbw.1	chr6	53362139	53409831
no Peak	GCN1L1	uc001txo.2	chr12	120565015	120632513
no Peak	GCNT1	uc010mpf.2	chr9	79034751	79122330
no Peak	GDAP1L1	uc002xlq.2	chr20	42875907	42909011
no Peak	GDAP2	uc001ehf.2	chr1	118406107	118472302
no Peak	GEMIN6	uc002rrb.2	chr2	38978675	39009104
no Peak	GFOD1	uc003nat.1	chr6	13363818	13487787
no Peak	GFPT1	uc002sfh.2	chr2	69546904	69614382
no Peak	GGCT	uc003tba.2	chr7	30536238	30544452
no Peak	GGNBP2	uc002hna.2	chr17	34900803	34942570
no Peak	GGPS1	uc001hwv.2	chr1	235491752	235507842
no Peak	GIN1	uc003koa.1	chr5	102421703	102455842
no Peak	GINS3	uc010cdj.2	chr16	58426297	58440047
no Peak	GINS4	uc003xnx.2	chr8	41386724	41402563
no Peak	GIPR	uc002pcu.1	chr19	46171501	46185717
no Peak	GJD3	uc010cwz.2	chr17	38516906	38520945
no Peak	GLA	uc011mrj.1	chrX	100656117	100663001
no Peak	GLB1	uc011axk.1	chr3	33038099	33138694
no Peak	GLCCI1	uc003srk.2	chr7	8008422	8128707
no Peak	GLG1	uc002fcx.2	chr16	74481327	74641042
no Peak	GLO1	uc003ooc.2	chr6	38643703	38670952
no Peak	GLOD4	uc010vqc.1	chr17	662549	685571
no Peak	GLP1R	uc003ooj.3	chr6	39016556	39055519
no Peak	GLRX2	uc001gta.1	chr1	193065599	193075244
no Peak	GLRX3	uc001lko.2	chr10	131934662	131982784
no Peak	GLRX5	uc001yem.1	chr14	96001322	96011055
no Peak	GLT25D1	uc002nhc.1	chr19	17666510	17693965
no Peak	GLTP	uc001tpm.2	chr12	110288748	110318293
no Peak	GLTSCR1	uc002phh.3	chr19	48111452	48206533
no Peak	GLUD1	uc001keh.2	chr10	88810245	88854623
no Peak	GLUL	uc001gpc.1	chr1	182351668	182360950
no Peak	GM2A	uc011dcs.1	chr5	150632612	151084743
no Peak	GMDS	uc003mtq.2	chr6	1624041	2245846
no Peak	GMFB	uc010tqz.1	chr14	54941208	54955744
no Peak	GMNN	uc003nem.2	chr6	24775158	24786276
no Peak	GNA12	uc003smu.2	chr7	2767742	2883959
no Peak	GNA13	uc002jfc.2	chr17	63005408	63052920
no Peak	GNAQ	uc004akw.2	chr9	80335199	80646192
no Peak	GNB1L	uc002zqf.1	chr22	19775933	19842462
no Peak	GNB1	uc001aif.2	chr1	1716729	1822495
no Peak	GNB4	uc003fjv.3	chr3	179113876	179169371
no Peak	GNB5	uc002abu.3	chr15	52441475	52472162
no Peak	GNG12	uc001dea.1	chr1	68167148	68299142
no Peak	GNG7	uc002lwd.2	chr19	2511217	2702746
no Peak	GNPAT	uc001hup.3	chr1	231376918	231413718
no Peak	GNPDA1	uc010jgh.2	chr5	141380237	141392620
no Peak	GNPTAB	uc001tit.2	chr12	102139277	102224632
no Peak	GOLGA1	uc010mwt.1	chr9	127674179	127701145
no Peak	GOLGA3	uc001ukz.1	chr12	133345494	133405288
no Peak	GOLGA4	uc003cgv.2	chr3	37284737	37408241
no Peak	GOLGB1	uc010hrd.1	chr3	121412587	121468602
no Peak	GOLIM4	uc003ffe.2	chr3	167727653	167813417
no Peak	GOLPH3	uc003jhp.1	chr5	32124823	32174425
no Peak	GOSR1	uc002hfd.2	chr17	28804425	28853831
no Peak	GOT2	uc002eof.1	chr16	58741034	58768246
no Peak	GPAM	uc009xxy.1	chr10	113909621	113943525
no Peak	GPATCH2	uc001hlf.1	chr1	217603833	217804409
no Peak	GPBP1L1	uc001coq.2	chr1	46092977	46152302
no Peak	GPBP1	uc010iwg.2	chr5	56469774	56559410
no Peak	GPC4	uc004exc.1	chrX	132435063	132549205
no Peak	GPD1L	uc003cew.2	chr3	32148143	32210196
no Peak	GPD2	uc002tzf.3	chr2	157291964	157442914
no Peak	GPHN	uc010tss.1	chr14	66974124	67648523
no Peak	GPKOW	uc004dmr.2	chrX	48970345	48980079
no Peak	GPR153	uc001amp.1	chr1	6308855	6321035
no Peak	GPR155	uc002uit.2	chr2	175296375	175351811
no Peak	GPR68	uc001xzh.2	chr14	91698876	91720224
no Peak	GPT2	uc002eel.2	chr16	46918307	46965200
no Peak	GRAMD4	uc003bhx.2	chr22	47022647	47075687
no Peak	GRB10	uc003tpm.2	chr7	50657759	50861159
no Peak	GRB14	uc002ucl.2	chr2	165349332	165478360
no Peak	GRB2	uc002jnx.3	chr17	73314157	73401790
no Peak	GREB1	uc002rbn.1	chr2	11682850	11732272
no Peak	GRHL2	uc010mbu.2	chr8	102504667	102681950
no Peak	GRM4	uc010jvh.2	chr6	33989628	34113869
no Peak	GRSF1	uc010iia.1	chr4	71681498	71705627
no Peak	GSC	uc001ydu.2	chr14	95234560	95236499
no Peak	GSG1L	uc002doz.2	chr16	27798849	28074830
no Peak	GSN	uc004bld.1	chr9	123963760	124095120
no Peak	GSPT1	uc010bux.2	chr16	11961986	12010519
no Peak	GSR	uc003xih.1	chr8	30536434	30585443
no Peak	GSTCD	uc003hxy.3	chr4	106629940	106768881
no Peak	GTDC1	uc002tvs.2	chr2	144703582	145090029
no Peak	GTF2A2	uc002agg.2	chr15	59930262	59949737
no Peak	GTF2B	uc001dmo.3	chr1	89318321	89357301
no Peak	GTF2E1	uc003edz.3	chr3	120461557	120501915
no Peak	GTF2H1	uc001moi.2	chr11	18343815	18388590
no Peak	GTF2H3	uc001ufo.1	chr12	124118380	124145334
no Peak	GTF2H5	uc003qrd.2	chr6	158589378	158620366
no Peak	GTF2I	uc003uau.2	chr7	74072029	74175020
no Peak	GTF3C2	uc010eyz.1	chr2	27556469	27579868
no Peak	GTF3C3	uc002uts.2	chr2	197629104	197664425
no Peak	GTF3C4	uc010mzw.2	chr9	135545727	135565468
no Peak	GTF3C6	uc003pum.2	chr6	111279762	111289089
no Peak	H2AFJ	uc001rch.3	chr12	14927269	14930934
no Peak	H2AFV	uc003tlz.2	chr7	44866487	44887725
no Peak	H3F3B	uc001hpw.2	chr1	226250420	226259702
no Peak	H6PD	uc001apt.2	chr1	9294862	9331392
no Peak	HADHA	uc010ykt.1	chr2	26434805	26467594
no Peak	HADHB	uc010ykv.1	chr2	26467615	26513332
no Peak	HARBI1	uc001ncy.2	chr11	46624856	46638777
no Peak	HAT1	uc002uhi.2	chr2	172778934	172848599
no Peak	HAUS1	uc002lbv.2	chr18	43684297	43708298
no Peak	HAUS2	uc001zqe.2	chr15	42841010	42862188
no Peak	HAUS8	uc002nfe.2	chr19	17160572	17186343
no Peak	HAX1	uc001fet.2	chr1	154245038	154248349
no Peak	HBEGF	uc003lfi.2	chr5	139712428	139726188
no Peak	HBXIP	uc001dzr.2	chr1	110943878	110950546
no Peak	HCG18	uc003npx.2	chr6	30255173	30294927
no Peak	HDAC4	uc002vyk.3	chr2	239969864	240322643
no Peak	HDHD2	uc002lcs.2	chr18	44633781	44676871
no Peak	HEATR2	uc010krz.1	chr7	766337	826116
no Peak	HEATR5A	uc010tpk.1	chr14	31803517	31926680
no Peak	HEATR6	uc002iyk.1	chr17	58120551	58156292
no Peak	HEBP1	uc001rbd.2	chr12	13127800	13153221
no Peak	HECW2	uc002utm.1	chr2	197063976	197457335
no Peak	HELZ	uc002jfx.3	chr17	65066554	65241319
no Peak	HERC4	uc001jng.3	chr10	69681656	69835103
no Peak	HERPUD1	uc010vhj.1	chr16	56965747	56971325
no Peak	HERPUD2	uc003tes.3	chr7	35672271	35734772
no Peak	HES6	uc002vxz.2	chr2	239146909	239148681
no Peak	HEXIM1	uc002iig.2	chr17	43224683	43229467
no Peak	HEXIM2	uc002iih.1	chr17	43238263	43247406
no Peak	HEY1	uc003ybl.2	chr8	80676245	80680098
no Peak	HHLA3	uc010oqp.1	chr1	70820492	70833703
no Peak	HIATL1	uc004aur.2	chr9	97136832	97223201
no Peak	HIF1AN	uc001krj.3	chr10	102295640	102313680
no Peak	HIF1A	uc010tsc.1	chr14	62162118	62193536
no Peak	HIPK3	uc001mul.1	chr11	33279167	33375939
no Peak	HIRA	uc010gro.1	chr22	19318223	19435220
no Peak	HIST1H2BC	uc003ngk.3	chr6	26114632	26124154
no Peak	HIST3H2A	uc001hsy.2	chr1	228645065	228645560
no Peak	HIVEP2	uc003qjd.2	chr6	143072604	143266338
no Peak	HJURP	uc002vvg.2	chr2	234745486	234763212
no Peak	HK2	uc002snd.2	chr2	75059781	75120474
[truncated: 2,025 more rows]
