# Supplementary material for: Dynamic transitions in RNA polymerase II density profiles during transcription termination
Source: HighWire-hosted journal article supplement (doi:10.1101/gr.138057.112), 2012-06-08
Supplement: SupplementaryTable4.xlsx [file SupplementaryTable4.xlsx]

## Sheet: Prom-Term Interactions K562
interA_1_chrom	interA_1_start	interA_1_end	interA_2_chrom	interA_2_start	interA_2_end	GeneName	transcriptID	chrom	strand	txStart	txEnd
chr1	955475	960210	chr1	992939	995691	AGRN	uc001ack.1	chr1	+	955502	991492
chr1	1108573	1112285	chr1	1112547	1117023	AK128833	uc001acx.1	chr1	-	1108435	1114935
chr1	1411163	1415504	chr1	1418494	1421384	ATAD3B	uc001afw.2	chr1	+	1413405	1418847
chr1	1532962	1537243	chr1	1538437	1541944	AK094692	uc001agf.1	chr1	+	1535818	1543166
chr1	1949070	1955513	chr1	1957401	1963693	GABRD	uc001aip.2	chr1	+	1950767	1962192
chr1	2158995	2162371	chr1	2241927	2244099	SKI	uc001aja.3	chr1	+	2160133	2241651
chr1	2478929	2481800	chr1	2484120	2487108	LOC115110	uc001ajp.2	chr1	-	2481358	2484284
chr1	3368404	3371298	chr1	3399140	3401997	ARHGEF16	uc001akg.3	chr1	+	3371146	3397675
chr1	5923909	5927934	chr1	5928685	5933059	NPHP4	uc001alr.1	chr1	-	5922870	5928435
chr1	6307810	6311304	chr1	6317855	6321101	GPR153	uc001amp.1	chr1	-	6308855	6321035
chr1	6613042	6616047	chr1	6639607	6644560	TAS1R1	uc001ant.2	chr1	+	6615433	6639816
chr1	7829867	7835997	chr1	7839576	7845513	VAMP3	uc001aol.2	chr1	+	7831328	7841491
chr1	8020034	8025973	chr1	8039952	8047596	PARK7	uc001aou.3	chr1	+	8021713	8045341
chr1	10456065	10459752	chr1	10480399	10483247	PGD	uc001arc.2	chr1	+	10459084	10480200
chr1	11101510	11104399	chr1	11106850	11110376	MASP2	uc001arv.2	chr1	-	11104855	11107285
chr1	11795369	11800535	chr1	11809242	11815267	AGTRAP	uc001ast.2	chr1	+	11796141	11810827
chr1	16274290	16280001	chr1	16298231	16304717	ZBTB17	uc009von.1	chr1	-	16274237	16302627
chr1	16944847	16949763	chr1	16967759	16972815	FLJ00313	uc001azg.1	chr1	-	16951872	16971178
chr1	17567274	17570091	chr1	17571981	17575294	hPAD-colony10	uc009vpb.1	chr1	+	17566189	17572501
chr1	19434735	19437890	chr1	19440249	19443284	UBR4	uc001bbj.1	chr1	-	19438133	19444474
chr1	24124685	24127620	chr1	24150568	24153526	HMGCL	uc001bib.2	chr1	-	24128367	24151949
chr1	26147469	26149745	chr1	26160776	26163124	FAM54B	uc001bkq.3	chr1	+	26146396	26159432
chr1	26350333	26356770	chr1	26358423	26364378	EXTL1	uc001blf.2	chr1	+	26348270	26362952
chr1	26500503	26506460	chr1	26510521	26514133	CNKSR1	uc010oex.1	chr1	+	26503980	26511677
chr1	26607198	26613218	chr1	26642826	26647615	UBXN11	uc001bma.2	chr1	-	26608774	26644756
chr1	26756472	26761839	chr1	26794085	26800903	DHDDS	uc001bmk.2	chr1	+	26758801	26797793
chr1	27015356	27031624	chr1	27105081	27118633	ARID1A	uc001bmu.1	chr1	+	27022521	27108601
chr1	27151976	27155138	chr1	27179831	27182362	ZDHHC18	uc001bnb.2	chr1	+	27153200	27182207
chr1	27427514	27429839	chr1	27479842	27481707	SLC9A1	uc001bnm.2	chr1	-	27425300	27481451
chr1	27934077	27937640	chr1	27937738	27943100	FGR	uc001boi.2	chr1	-	27938802	27942174
chr1	28156111	28161657	chr1	28170547	28179116	PPP1R8	uc001bov.1	chr1	+	28157292	28178183
chr1	28843184	28844982	chr1	28863937	28866741	RCC1	uc001bqe.1	chr1	+	28844744	28865607
chr1	31181629	31187503	chr1	31188408	31191077	MATN1	uc001bsa.1	chr1	-	31187093	31192099
chr1	31338816	31342172	chr1	31349384	31351013	SDC3	uc001bsd.2	chr1	-	31342312	31351587
chr1	31884568	31888691	chr1	31897968	31903684	TDE2	uc009vtw.1	chr1	+	31885962	31899166
chr1	32090392	32093285	chr1	32109241	32112099	PEF1	uc001bth.1	chr1	-	32095470	32110477
chr1	32756021	32760087	chr1	32798278	32803310	HDAC1	uc001bvb.1	chr1	+	32757707	32799224
chr1	33116820	33120346	chr1	33150777	33152898	RBBP4	uc001bvr.2	chr1	+	33116748	33151810
chr1	33473866	33489490	chr1	33492858	33505099	AK2	uc001bwo.1	chr1	-	33473585	33502492
chr1	35435788	35440761	chr1	35444377	35450469	ZMYM6	uc001byd.3	chr1	-	35439959	35450920
chr1	36597876	36603575	chr1	36611953	36616832	TRAPPC3	uc001bzx.2	chr1	-	36602174	36615067
chr1	38272213	38276597	chr1	38322943	38326912	MTF1	uc001cce.1	chr1	-	38275238	38325292
chr1	40203460	40207928	chr1	40225577	40228179	PPIE	uc001cdv.2	chr1	+	40204529	40229585
chr1	40308168	40311882	chr1	40315620	40318411	MOD5	uc001cec.3	chr1	-	40306707	40319738
chr1	40537989	40542209	chr1	40562412	40564658	PPT1	uc001cfb.2	chr1	-	40538381	40563142
chr1	40972228	40976563	chr1	40977612	40981518	DEM1	uc001cfp.2	chr1	+	40974432	40982212
chr1	42920424	42925632	chr1	42926267	42934489	PPCS	uc001chk.2	chr1	+	42922172	42926085
chr1	43195399	43198375	chr1	43207097	43209525	CLDN19	uc001cht.1	chr1	-	43198763	43205925
chr1	43280751	43284838	chr1	43310220	43314120	ERMAP	uc001cic.1	chr1	+	43282775	43310660
chr1	43799021	43807148	chr1	43808166	43816195	MPL	uc001civ.2	chr1	+	43803474	43815206
chr1	43911567	43914884	chr1	43916431	43919855	KIAA0467	uc001cjl.1	chr1	+	43910922	43918304
chr1	44113931	44127595	chr1	44169181	44176977	KDM4A	uc001cjx.2	chr1	+	44115796	44171188
chr1	46014904	46020261	chr1	46034308	46041374	AKR1A1	uc001cod.2	chr1	+	46016497	46035720
chr1	46049177	46052526	chr1	46084544	46088171	NASP	uc001coh.1	chr1	+	46049716	46084567
chr1	46500117	46505906	chr1	46642218	46647717	PIK3R3	uc010olw.1	chr1	-	46505812	46642160
chr1	46648447	46653398	chr1	46660649	46666552	POMGNT1	uc010olx.1	chr1	-	46654353	46663145
chr1	46711512	46718649	chr1	46736779	46744030	RAD54L	uc009vye.2	chr1	+	46713366	46744145
chr1	47130612	47137538	chr1	47138503	47143012	C1orf223	uc010omi.1	chr1	+	47137499	47139166
chr1	47694063	47695820	chr1	47778325	47781365	STIL	uc001crb.1	chr1	-	47694867	47779819
chr1	47798523	47802030	chr1	47822475	47824105	CMPK1	uc001crh.2	chr1	+	47799468	47824547
chr1	52886424	52891241	chr1	53016332	53020404	ZCCHC11	uc001ctx.2	chr1	-	52888947	53018762
chr1	53551714	53555936	chr1	53558307	53560671	SLC1A7	uc001cux.2	chr1	-	53552855	53556654
chr1	53661420	53666172	chr1	53673940	53678060	CPT2	uc001cvb.3	chr1	+	53662100	53679867
chr1	59242448	59252747	chr1	59356992	59375072	AK055150	uc001czf.2	chr1	+	59250822	59365384
chr1	70692896	70695423	chr1	70718003	70720357	SFRS11	uc001dev.2	chr1	+	70695960	70717683
chr1	76188926	76192007	chr1	76225372	76229604	ACADM	uc010ord.1	chr1	+	76190042	76227299
chr1	84972325	84974748	chr1	85028304	85030920	SPATA1	uc001djz.1	chr1	+	84971973	85031875
chr1	85642382	85644917	chr1	85665862	85668186	SYDE2	uc001dku.3	chr1	-	85646848	85666728
chr1	100728769	100730989	chr1	100735570	100738425	RTCD1	uc010ouh.1	chr1	+	100731713	100739511
chr1	109791236	109793578	chr1	109816659	109819531	CELSR2	uc001dxa.3	chr1	+	109792640	109818377
chr1	110006000	110010407	chr1	110018426	110022707	SYPL2	uc001dxo.2	chr1	+	110009099	110021304
chr1	110196907	110202972	chr1	110207885	110212031	GSTM4	uc001dyh.2	chr1	+	110198697	110208123
chr1	110602507	110605895	chr1	110615305	110617679	ALX3	uc001dzb.2	chr1	-	110602997	110613322
chr1	111716663	111720331	chr1	111727191	111729366	CEPT1	uc009wfz.1	chr1	+	111717500	111727724
chr1	112285589	112288469	chr1	112294528	112296765	BC041890	uc001ebr.2	chr1	-	112287938	112298131
chr1	113160799	113166409	chr1	113215716	113220433	CAPZA1	uc001ecj.1	chr1	+	113162074	113214241
chr1	115256011	115263976	chr1	115297234	115302599	CSDE1	uc001efk.2	chr1	-	115259537	115300671
chr1	116914834	116917412	chr1	116947059	116948676	ATP1A1	uc010owv.1	chr1	+	116915003	116946597
chr1	118147303	118156003	chr1	118163968	118173604	FAM46C	uc001ehe.2	chr1	+	118148603	118171010
chr1	120161786	120164966	chr1	120187188	120189749	ZNF697	uc001ehy.1	chr1	-	120161999	120190390
chr1	120282346	120286075	chr1	120287322	120291391	PGDH3	uc001eic.2	chr1	+	120285421	120286848
chr1	145453247	145456605	chr1	145469004	145471788	POLR3GL	uc001enp.1	chr1	-	145456235	145470387
chr1	150196400	150199803	chr1	150204196	150206419	ANP32E	uc010pbw.1	chr1	-	150198939	150208504
chr1	150246450	150248779	chr1	150251520	150254627	C1orf54	uc001euc.2	chr1	+	150244772	150253325
chr1	150265474	150267107	chr1	150276871	150279433	MRPS21	uc001euk.2	chr1	+	150266268	150280818
chr1	150458349	150461509	chr1	150477076	150480525	TARS2	uc001euq.2	chr1	+	150459919	150479747
chr1	150953327	150957101	chr1	150963848	150966352	ANXA9	uc001ewa.2	chr1	+	150954498	150968114
chr1	151106109	151108676	chr1	151117941	151119953	semaY	uc009wml.1	chr1	-	151109332	151119104
chr1	153514728	153519163	chr1	153523629	153528346	AK307246	uc009wog.1	chr1	+	153518229	153524245
chr1	153651210	153654277	chr1	153662506	153664401	NPR1	uc001fcs.3	chr1	+	153651163	153666467
chr1	154130378	154132866	chr1	154153515	154156872	BC073144	uc009wor.2	chr1	-	154128840	154155659
chr1	154191842	154194909	chr1	154241050	154247826	UBAP2L	uc001fep.3	chr1	+	154193324	154243328
chr1	155174590	155181850	chr1	155192419	155201858	GBA	uc001fjf.3	chr1	-	155183616	155197325
chr1	156022485	156028763	chr1	156033587	156043738	RAB25	uc001fnc.2	chr1	+	156030965	156040293
chr1	156215081	156220815	chr1	156233448	156236629	SMG5	uc009wrv.2	chr1	-	156219529	156236171
chr1	156387887	156395391	chr1	156395897	156402271	C1orf61	uc001fpa.2	chr1	-	156395431	156400493
chr1	156707952	156712742	chr1	156734255	156739702	HDGF	uc009wsf.2	chr1	-	156711899	156736717
chr1	156810363	156815580	chr1	156828168	156831099	INSRR	uc010pht.1	chr1	-	156810665	156828666
chr1	156890139	156892770	chr1	156898041	156900876	C1orf92	uc001fqm.2	chr1	+	156890423	156902880
chr1	159893029	159897081	chr1	159913897	159916842	IGSF9	uc001fuq.2	chr1	-	159896828	159915386
chr1	160162017	160168926	chr1	160173440	160177099	CASQ1	uc010pja.1	chr1	+	160160284	160171674
chr1	160334388	160339100	chr1	160339688	160343736	NHLH1	uc001fwa.2	chr1	+	160336860	160342638
chr1	161172177	161174720	chr1	161179116	161181614	NDUFS2	uc001fyy.1	chr1	+	161173226	161179103
chr1	162334663	162338033	chr1	162340395	162343942	NOS1AP	uc009wut.1	chr1	+	162332772	162339813
chr1	168146917	168149255	chr1	168169286	168172209	TIPRL	uc001gfg.2	chr1	+	168148170	168171349
chr1	169764079	169768334	chr1	169771934	169775856	C1orf112	uc001ggo.2	chr1	+	169763870	169773522
chr1	170499494	170504219	chr1	170507198	170509728	GORAB	uc009wvw.2	chr1	+	170501262	170508708
chr1	171750108	171754190	chr1	171766349	171769659	METTL13	uc001ghz.2	chr1	+	171750760	171766855
chr1	172406341	172410996	chr1	172411275	172416251	PIGC	uc001gil.2	chr1	-	172410597	172413196
chr1	173767085	173770126	chr1	173792491	173795872	CENPL	uc009wwg.2	chr1	-	173768689	173793157
chr1	173789473	173804179	chr1	173828884	173842109	DARS2	uc001gjh.1	chr1	+	173793957	173827682
chr1	173834423	173839746	chr1	173850536	173854569	ZBTB37	uc001gjp.1	chr1	+	173837219	173855774
chr1	174411537	174416184	chr1	174417800	174420410	GPR52	uc001gka.1	chr1	+	174417211	174418683
chr1	174927580	174945830	chr1	174955726	174971213	KIAA0471	uc010pmv.1	chr1	+	174933904	174959724
chr1	179848878	179852546	chr1	179885763	179889262	TOR1AIP1	uc001gnq.2	chr1	+	179851419	179889212
chr1	183439118	183441854	chr1	183516155	183518507	SMG7	uc010pob.1	chr1	+	183441633	183515472
chr1	183597386	183600124	chr1	183603356	183605998	ARPC5	uc001gql.2	chr1	-	183595332	183604985
chr1	200605932	200611661	chr1	200637472	200641392	DDX59	uc010ppl.1	chr1	-	200610118	200639126
chr1	202857977	202861913	chr1	202894830	202898664	KLHL12	uc001gyo.1	chr1	-	202860229	202896371
chr1	205559599	205562385	chr1	205570126	205572309	DKFZp761N1114	uc009xbn.2	chr1	+	205561267	205571217
chr1	205627868	205631550	chr1	205647064	205650160	SLC45A3	uc001hda.1	chr1	-	205626980	205649630
chr1	205680186	205682296	chr1	205714399	205717286	NUCKS1	uc001hdb.2	chr1	-	205681946	205719361
chr1	206806289	206810481	chr1	206822225	206826688	DYRK3	uc001hei.2	chr1	+	206808880	206822541
chr1	206807256	206810097	chr1	206860030	206861815	RED	uc001hek.2	chr1	+	206808880	206857758
chr1	208385284	208391275	chr1	208391814	208396782	PLXNA2	uc001hha.3	chr1	-	208383348	208392095
chr1	209956289	209959543	chr1	209978892	209981541	IRF6	uc001hhq.1	chr1	-	209961261	209979479
chr1	213222798	213224539	chr1	213232214	213234723	RPK118	uc009xdh.2	chr1	+	213224587	213234869
chr1	214777011	214779791	chr1	214784551	214787409	FAM108A6	uc001hkn.1	chr1	-	214778799	214782556
chr1	220082601	220085803	chr1	220097043	220100830	SLC30A10	uc001hlw.2	chr1	-	220087606	220101993
chr1	227127006	227129793	chr1	227152681	227157136	CABC1	uc010pvp.1	chr1	+	227127937	227153111
chr1	234860890	234865568	chr1	234869226	234872667	AK125357	uc001hwj.1	chr1	+	234861147	234867390
chr1	235289381	235294878	chr1	235322915	235328048	RBM34	uc001hwn.2	chr1	-	235294498	235324772
chr1	246947863	246950737	chr1	246955534	246958026	LOC149134	uc010pyt.1	chr1	+	246952918	246954788
chr1	247334201	247339672	chr1	247340521	247343576	BC043220	uc001icl.1	chr1	-	247337903	247338870
chr1	247461556	247465350	chr1	247467126	247471967	ZNF496	uc001icq.1	chr1	-	247465777	247473758
chr1	247689279	247692971	chr1	247695399	247699570	OR2C3	uc009xgy.2	chr1	-	247693434	247697141
chr10	4865557	4869749	chr10	4889417	4893452	AKR1CL2	uc001ihh.1	chr10	+	4868401	4889491
chr10	12205079	12208046	chr10	12211097	12214947	CR611074	uc001ili.1	chr10	-	12207088	12209067
chr10	13311589	13318731	chr10	13341659	13346339	PHYH	uc001ime.2	chr10	-	13319796	13341746
chr10	32554716	32558493	chr10	32634111	32636852	EPC1	uc001iwg.1	chr10	-	32557858	32636113
chr10	49715021	49718761	chr10	49720982	49725227	AX747901	uc001jgx.1	chr10	-	49717903	49719721
chr10	51564909	51568960	chr10	51591606	51594482	NCOA4	uc009xon.2	chr10	+	51565107	51590733
chr10	64892188	64895520	chr10	64910827	64916333	NRBF2	uc001jmj.3	chr10	+	64893006	64914785
chr10	70147235	70152362	chr10	70163918	70168181	RUFY2	uc001joe.1	chr10	-	70153520	70167051
chr10	70660052	70664551	chr10	70671833	70675311	DDX50	uc001jot.2	chr10	+	70661033	70674776
chr10	71910436	71915381	chr10	71926027	71931969	SAR1A	uc010qjh.1	chr10	-	71909966	71930285
chr10	72163952	72167470	chr10	72190209	72192843	EIF4EBP2	uc001jrb.2	chr10	+	72163860	72188372
chr10	73515331	73518352	chr10	73532036	73534875	C10orf54	uc001jsf.1	chr10	-	73520236	73533337
chr10	75501569	75513310	chr10	75517824	75534704	SEC24C	uc010qkn.1	chr10	+	75504131	75526611
chr10	75570221	75572944	chr10	75633652	75635761	CAMK2G	uc001jvm.1	chr10	-	75572258	75634343
chr10	75668971	75672963	chr10	75683601	75687893	C10orf55	uc001jvz.1	chr10	-	75669733	75682535
chr10	81064702	81069372	chr10	81073137	81076327	KIAA1224	uc010qlq.1	chr10	+	81065856	81076285
chr10	81912690	81915369	chr10	81963810	81967723	ANXA11	uc001kbq.1	chr10	-	81914879	81964247
chr10	85972704	85976029	chr10	85976349	85981922	PCDH21	uc001kcx.2	chr10	+	85972632	85977119
chr10	93387435	93390652	chr10	93392972	93396624	PPP1R3C	uc001kho.2	chr10	-	93388200	93392858
chr10	94819837	94822581	chr10	94829729	94831832	CYP26C1	uc010qns.1	chr10	+	94821020	94828453
chr10	97800626	97807538	chr10	97808400	97818452	CCNJ	uc010qoq.1	chr10	+	97803158	97820623
chr10	99172474	99176419	chr10	99183924	99185972	LOC644215	uc001kng.1	chr10	-	99178540	99185802
chr10	101945738	101949017	chr10	101987932	101990949	CHUK	uc001kqp.2	chr10	-	101948124	101989344
chr10	102033439	102035808	chr10	102044508	102047259	BLOC1S2	uc001kqv.1	chr10	-	102033712	102046114
chr10	102132257	102134190	chr10	102150086	102154052	C10orf75	uc001kqz.3	chr10	+	102133332	102148110
chr10	102728195	102731418	chr10	102744816	102751016	SEMA4G	uc001krv.2	chr10	+	102729279	102745372
chr10	103541619	103543550	chr10	103574699	103578699	MGEA5	uc001ktv.2	chr10	-	103544199	103578222
chr10	104614048	104619714	chr10	104621788	104624762	C10orf32	uc001kwh.2	chr10	+	104613966	104624718
chr10	106066763	106070949	chr10	106092301	106095726	ITPRIP	uc001kyf.2	chr10	-	106071900	106093663
chr10	115594862	115598706	chr10	115612276	115615442	DCLRE1A	uc001law.2	chr10	-	115594483	115613859
chr10	126133370	126136958	chr10	126138979	126141523	NKX1-2	uc010quf.1	chr10	-	126135998	126138550
chr10	133778362	133780858	chr10	133785446	133787238	AK125699	uc001lku.1	chr10	-	133781186	133783869
chr10	134208591	134214169	chr10	134231062	134238882	PWWP2B	uc001lll.3	chr10	+	134210701	134231351
chr10	135089058	135096756	chr10	135117861	135124176	TUBGCP2	uc001lmg.1	chr10	-	135093137	135122644
chr11	213257	225976	chr11	226112	238554	SIRT3	uc001loj.3	chr11	-	215030	236362
chr11	312365	317016	chr11	325140	331468	BC040735	uc001loz.2	chr11	+	318652	325629
chr11	574478	577989	chr11	613102	618052	PHRF1	uc010qwc.1	chr11	+	576482	612220
chr11	700830	704359	chr11	719417	722597	EPS8R2	uc010qwj.1	chr11	+	706119	722302
chr11	2963787	2966566	chr11	2967130	2973498	NAP1L4	uc001lxb.2	chr11	-	2965660	2973999
chr11	4619365	4621558	chr11	4626252	4629277	TRIM68	uc001lzf.1	chr11	-	4619901	4629437
chr11	6411491	6417099	chr11	6417551	6421246	APBB1	uc001mcy.1	chr11	-	6416354	6417804
chr11	6478172	6481571	chr11	6491583	6495213	TRIM3	uc001mdj.2	chr11	-	6477526	6494994
chr11	6526938	6529695	chr11	6536992	6539927	DNHD1	uc001mdq.2	chr11	+	6529442	6542096
chr11	6560840	6565601	chr11	6565717	6568914	DNHD1L	uc001mds.1	chr11	+	6561093	6567895
chr11	10821312	10832598	chr11	10875146	10882197	DKFZp564M0764	uc001mjg.1	chr11	-	10833620	10877804
chr11	10877320	10881938	chr11	10898056	10904566	BC014360	uc001mjl.1	chr11	+	10879805	10900820
chr11	17097208	17101887	chr11	17227768	17230798	PIK3C2A	uc009ygu.1	chr11	-	17099276	17229530
chr11	18415543	18417980	chr11	18429058	18431461	LDHA	uc001mok.3	chr11	+	18415935	18429765
chr11	20384141	20391472	chr11	20407232	20412377	HTATIP2	uc009yia.1	chr11	+	20385230	20405329
chr11	22638905	22642486	chr11	22644261	22647284	FANCF	uc001mql.1	chr11	-	22644078	22647387
chr11	28130690	28133390	chr11	28147926	28151821	METT5D1	uc001msf.1	chr11	+	28131712	28147409
chr11	30343387	30348036	chr11	30358153	30364779	C11orf46	uc001mso.1	chr11	+	30344648	30359165
chr11	34072006	34079358	chr11	34124269	34129390	CAPRIN1	uc001mvh.1	chr11	+	34073229	34124157
chr11	44085476	44090577	chr11	44101923	44105594	ACCS	uc009yks.1	chr11	+	44087728	44105569
chr11	44086293	44089644	chr11	44094962	44099108	EXT2	uc010rfn.1	chr11	+	44087811	44098951
chr11	45869438	45872196	chr11	45903876	45906831	CRY2	uc010rgn.1	chr11	+	45868956	45904797
chr11	47268303	47273264	chr11	47289525	47294481	NR1H3	uc010rhk.1	chr11	+	47269850	47290400
chr11	57478095	57481312	chr11	57507421	57511942	TMX2	uc001nlc.1	chr11	+	57480041	57508444
chr11	58345131	58348848	chr11	58387112	58390850	ZFP91	uc001nmx.3	chr11	+	58346586	58388513
chr11	61636103	61642064	chr11	61657241	61660679	FADS3	uc001nsm.2	chr11	-	61640998	61659006
chr11	61890258	61893100	chr11	61907264	61909168	INCENP	uc009ynv.2	chr11	+	61891444	61905447
chr11	62323837	62326900	chr11	62339205	62341755	EEF1G	uc001ntn.1	chr11	-	62327107	62340214
chr11	62387607	62392064	chr11	62413690	62415602	GANAB	uc001nua.2	chr11	-	62392299	62414104
chr11	62455845	62461275	chr11	62472394	62475433	BSCL2	uc001nuo.1	chr11	-	62457746	62473706
chr11	63271556	63274584	chr11	63282220	63284001	LGALS12	uc001nxa.2	chr11	+	63273523	63284246
chr11	64121829	64128526	chr11	64138236	64143726	RPS6KA4	uc001oad.2	chr11	+	64126624	64139686
chr11	64489616	64492284	chr11	64509871	64511516	RASGRP2	uc001oat.2	chr11	-	64494383	64508355
chr11	64793282	64795774	chr11	64807101	64811680	SNX15	uc001ocj.2	chr11	+	64794789	64808042
chr11	64808449	64811951	chr11	64826816	64828582	NAALADL1	uc001ocn.2	chr11	-	64812296	64826009
chr11	64983043	64986391	chr11	64991756	64994999	SLC22A20	uc010rob.1	chr11	+	64981346	64993683
chr11	66360351	66362912	chr11	66368673	66371357	CCS	uc001oir.2	chr11	+	66360689	66373489
chr11	68770276	68775561	chr11	68775880	68780128	MRGPRF	uc001ooo.3	chr11	-	68771862	68780850
chr11	69222468	69227659	chr11	69232011	69236106	AX746803	uc001ooy.1	chr11	+	69229074	69231600
chr11	71719750	71724026	chr11	71727907	71732145	NUMA1 variant protein	uc001orn.2	chr11	-	71718234	71727306
chr11	72407255	72411434	chr11	72413782	72416688	KIAA0782	uc001osw.1	chr11	-	72408955	72414419
chr11	76369699	76372480	chr11	76377429	76382603	LRRC32	uc010rsf.1	chr11	-	76370649	76381044
chr11	77878124	77881896	chr11	77897027	77903560	KCTD21	uc001ozb.2	chr11	-	77882300	77899664
chr11	88045019	88056011	chr11	88057560	88072955	CTSC	uc001pcm.3	chr11	-	88053981	88070941
chr11	94697123	94703731	chr11	94703819	94707783	CWC15	uc009ywl.1	chr11	-	94704127	94706710
chr11	95574709	95577469	chr11	95654980	95659399	MTMR2	uc010ruj.1	chr11	-	95578116	95656960
chr11	102934202	102936588	chr11	102960571	102963290	DCUN1D5	uc001phm.2	chr11	-	102932821	102962869
chr11	108333954	108342521	chr11	108361561	108373383	KDELC2	uc001pki.2	chr11	-	108342832	108362231
chr11	111806496	111809306	chr11	111895493	111898724	DIXDC1	uc001pml.2	chr11	+	111807926	111893305
chr11	112116260	112119598	chr11	112121240	112126920	AY364433	uc001pnk.1	chr11	-	112119501	112120006
chr11	118472931	118481337	chr11	118528767	118536791	PHLDB1	uc001ptr.1	chr11	+	118477212	118528741
chr11	119056955	119061052	chr11	119063862	119067111	CCDC153	uc010rze.1	chr11	-	119060964	119066710
chr11	120193025	120195977	chr11	120201525	120204056	TMEM136	uc001pxg.2	chr11	+	120196015	120201346
chr11	124491989	124497088	chr11	124502914	124510234	TBRG1	uc001qak.3	chr11	+	124492741	124505821
chr11	130776599	130780556	chr11	130780964	130784694	SNX19	uc001qgl.3	chr11	-	130775551	130786382
chr12	2963659	2966636	chr12	2970798	2975239	U90917	uc001qld.2	chr12	+	2966453	2968956
chr12	2983887	2989982	chr12	2997277	3001715	C12orf32	uc001qlh.2	chr12	+	2986364	2998624
chr12	6599781	6605377	chr12	6641428	6647582	NCAPD2	uc001qoo.2	chr12	+	6603297	6641132
chr12	6771010	6774041	chr12	6796908	6800141	ZNF384	uc001qpz.2	chr12	-	6775643	6797825
chr12	6920468	6924006	chr12	6925841	6929737	CD4	uc010sfm.1	chr12	+	6923219	6929976
chr12	7258873	7264956	chr12	7273923	7278217	UNQ2963	uc001qsp.2	chr12	+	7260903	7274446
chr12	8078026	8081783	chr12	8085460	8087380	SLC2A3	uc001qts.2	chr12	-	8082100	8088892
chr12	27173985	27178997	chr12	27179878	27184286	MED21	uc001rhp.1	chr12	+	27175482	27182682
chr12	42707619	42711063	chr12	42718047	42720920	ZCRB1	uc001rmz.2	chr12	-	42705888	42719932
chr12	48122622	48126569	chr12	48133427	48136331	RAPGEF3	uc001rpw.2	chr12	-	48128454	48136075
chr12	48178059	48181422	chr12	48185905	48188715	HDAC7	uc009zku.2	chr12	-	48176508	48185787
chr12	48731724	48737573	chr12	48737990	48746470	ZNF641	uc001rrn.1	chr12	-	48735911	48744001
chr12	49523298	49526534	chr12	49578242	49583023	TUBA1B	uc001rto.2	chr12	-	49521567	49580616
chr12	49933783	49936509	chr12	49951821	49953726	KCNH3	uc001ruh.1	chr12	+	49932939	49952077
chr12	50030609	50033291	chr12	50101156	50102921	FMNL3	uc001ruv.1	chr12	-	50031723	50101197
chr12	50133826	50139217	chr12	50155590	50158572	TMBIM6	uc001rux.2	chr12	+	50135292	50158717
chr12	50220758	50227724	chr12	50229554	50234634	BCDIN3D	uc010smm.1	chr12	+	50222325	50234936
chr12	50475132	50479699	chr12	50479828	50484275	SMARCD1	uc010smo.1	chr12	+	50478982	50483205
chr12	51439067	51445190	chr12	51449547	51456560	LETMD1	uc010smz.1	chr12	+	51442083	51450285
chr12	51454870	51461450	chr12	51474103	51478804	CSRNP2	uc001rxu.1	chr12	-	51454989	51477333
chr12	53398964	53405909	chr12	53436244	53442939	EIF4B	uc001sbh.3	chr12	+	53400061	53435992
chr12	53401510	53403985	chr12	53417438	53419585	eIF4B	uc009zmp.1	chr12	+	53400061	53421703
chr12	53431916	53438221	chr12	53438280	53442363	CR590020	uc001sbj.1	chr12	-	53432747	53440841
chr12	53551343	53553907	chr12	53571713	53575679	CSAD	uc009zmt.2	chr12	-	53551447	53572380
chr12	53597864	53602648	chr12	53610519	53616369	RARG	uc001scd.2	chr12	-	53604353	53614150
chr12	53697483	53701175	chr12	53713062	53715431	AAAS	uc001scr.3	chr12	-	53701240	53715412
chr12	54101190	54105644	chr12	54107950	54111992	CALCOCO1	uc001see.2	chr12	-	54104902	54108477
chr12	56222506	56227501	chr12	56233677	56237355	MMP19	uc001sia.2	chr12	-	56229214	56233818
chr12	56307383	56310841	chr12	56318368	56320626	PYM	uc001sig.2	chr12	-	56307610	56321697
chr12	56366407	56369311	chr12	56387983	56390869	RAB5B	uc001siv.2	chr12	+	56367759	56388478
chr12	56471291	56475668	chr12	56497220	56500908	ERBB3	uc001sjh.2	chr12	+	56473891	56497127
chr12	56596901	56601818	chr12	56613329	56617125	RNF41	uc001ske.1	chr12	-	56598285	56615704
chr12	57007109	57010688	chr12	57028709	57032558	KIAA0314	uc010sqr.1	chr12	-	57008566	57030163
chr12	57635469	57640213	chr12	57641305	57644273	STAC3	uc009zpl.2	chr12	-	57637241	57644976
chr12	57821945	57831494	chr12	57839441	57852842	INHBC	uc001snv.1	chr12	+	57828542	57844609
chr12	57879207	57888227	chr12	57906247	57918451	MARS	uc001sof.1	chr12	+	57881076	57911334
chr12	58117957	58120676	chr12	58129042	58131410	AGAP2	uc001spq.2	chr12	-	58118994	58132029
chr12	64796894	64803590	chr12	64839858	64848176	XPOT	uc001ssb.2	chr12	+	64798232	64842461
chr12	69067138	69070523	chr12	69077237	69079726	CR620484	uc001sud.1	chr12	-	69068284	69080583
chr12	69653436	69658257	chr12	69662379	69666693	CPSF6	uc010stk.1	chr12	+	69652369	69668137
chr12	69743573	69748369	chr12	69748776	69751964	LYZ	uc001suw.2	chr12	+	69742133	69748013
chr12	95465222	95468284	chr12	95610188	95612865	FGD6	uc001tdp.3	chr12	-	95470525	95611240
chr12	95866554	95869339	chr12	95910294	95913913	METAP2	uc001tec.2	chr12	+	95867821	95909611
chr12	98908247	98910915	chr12	98927576	98931191	TMPO	uc001tfh.1	chr12	+	98909408	98928321
chr12	104233715	104236918	chr12	104321893	104325386	LOC253724	uc010swf.1	chr12	-	104237527	104323989
chr12	109489130	109493045	chr12	109527238	109529408	USP30	uc010sxi.1	chr12	+	109490379	109525821
chr12	109913927	109917173	chr12	109927251	109929385	UBE3B	uc001tol.1	chr12	+	109915438	109928410
chr12	110885096	110890234	chr12	110904591	110909303	GPN3	uc001tqr.2	chr12	-	110890291	110906064
chr12	111797244	111799685	chr12	111804271	111806977	FAM109A	uc001tsd.3	chr12	-	111798484	111806925
chr12	111839350	111844325	chr12	111884847	111889632	SH2B3	uc001tse.2	chr12	+	111843751	111889426
chr12	113587253	113590927	chr12	113596476	113600299	CCDC42B	uc010sys.1	chr12	+	113587662	113597080
chr12	113627263	113631121	chr12	113657411	113660860	IQCD	uc001tuu.2	chr12	-	113633247	113658880
chr12	120903651	120915747	chr12	120930491	120936868	DYNLL1	uc001tyj.2	chr12	+	120907659	120936297
chr12	121835704	121841982	chr12	121855433	121861253	RNF34	uc010szw.1	chr12	+	121837901	121856542
chr12	122214406	122216955	chr12	122229851	122233377	RHOF	uc001ubb.2	chr12	-	122215661	122231594
chr12	122276014	122279424	chr12	122324501	122328226	HPD	uc001ubk.2	chr12	-	122277434	122326517
chr12	122688288	122691366	chr12	122708809	122712145	DIABLO	uc010taa.1	chr12	-	122692209	122712068
chr12	122957285	122960150	chr12	122980632	122982644	ZCCHC8	uc009zxp.2	chr12	-	122957435	122983414
chr12	123463900	123466022	chr12	123633750	123636695	PITPNM2	uc001uek.1	chr12	-	123468026	123635285
chr12	123716155	123719079	chr12	123740733	123744668	C12orf65	uc001uen.2	chr12	+	123717840	123742481
chr12	123941593	123946153	chr12	123949136	123952652	SNRNP35	uc009zxz.2	chr12	+	123942650	123950941
chr12	124067363	124072745	chr12	124084857	124088217	TMED2	uc001ufg.2	chr12	+	124069075	124082681
chr12	125431473	125435554	chr12	125435934	125439754	KIAA1517	uc001ugz.1	chr12	-	125431376	125437116
chr12	132547705	132550972	chr12	132564240	132568549	KIAA1818	uc001ujp.2	chr12	+	132547010	132565004
chr12	133263528	133266988	chr12	133278026	133283649	PXMP2	uc001ukt.2	chr12	+	133264191	133281576
chr12	133302904	133307857	chr12	133307873	133313932	ANKLE2	uc009zyw.1	chr12	-	133302253	133311275
chr13	27999930	28002841	chr13	28005811	28008669	GTF3A	uc001ure.2	chr13	+	27998680	28009846
chr13	28007557	28011046	chr13	28014207	28018148	MTIF3	uc001urh.2	chr13	-	28009782	28015809
chr13	36870111	36873705	chr13	36917978	36921760	SPG20	uc001uvn.2	chr13	-	36875776	36920646
chr13	48864151	48871869	chr13	48872289	48878751	BC039553	uc001vca.2	chr13	-	48870650	48877797
chr13	52584551	52590049	chr13	52591418	52597330	ALG11	uc001vfz.1	chr13	+	52586549	52591849
chr13	111294769	111302902	chr13	111363368	111369699	OK/SW-cl.10	uc010tjm.1	chr13	-	111296302	111365950
chr13	111513505	111516431	chr13	111520576	111523488	C13orf29	uc001vrk.2	chr13	-	111516333	111522655
chr13	111539895	111546985	chr13	111563927	111568083	ANKRD10	uc001vro.1	chr13	-	111545044	111567416
chr13	113829935	113833820	chr13	113837734	113841194	PCID2	uc001vtb.2	chr13	-	113831924	113840346
chr13	115000178	115003108	chr13	115005213	115008667	CDC16	uc010tkm.1	chr13	+	115000361	115008823
chr13	115044967	115048354	chr13	115068615	115070427	UPF3A	uc001vup.2	chr13	+	115047077	115071281
chr14	21969916	21972018	chr14	21978032	21980758	METTL3	uc001wbd.1	chr14	-	21970519	21979457
chr14	23067979	23071000	chr14	23074211	23077035	ABHD4	uc010tmz.1	chr14	+	23067146	23073161
chr14	23416591	23418855	chr14	23424142	23427354	C14orf94	uc001who.2	chr14	-	23415437	23424385
chr14	23739728	23746287	chr14	23753223	23755755	HOMEZ	uc001wja.2	chr14	-	23742843	23755309
chr14	23822649	23826401	chr14	23830118	23834043	EFS	uc001wjo.2	chr14	-	23825611	23834842
chr14	24542884	24546835	chr14	24548833	24551522	CPNE6	uc001wll.2	chr14	+	24540735	24547295
chr14	24615467	24617624	chr14	24629308	24633322	RNF31	uc001wml.1	chr14	+	24616095	24630547
chr14	24681838	24686459	chr14	24698203	24703209	NEDD8	uc001wnn.2	chr14	-	24686056	24701576
chr14	24837386	24841607	chr14	24843315	24846573	NFATC4	uc010alu.2	chr14	+	24837225	24843912
chr14	31887046	31892106	chr14	31923824	31928892	BC041327	uc001wri.2	chr14	+	31889963	31922086
chr14	35173248	35178951	chr14	35179465	35185421	CFL2	uc001wsg.3	chr14	-	35179587	35183023
chr14	53172221	53176787	chr14	53178476	53181684	PSMC6	uc010tqv.1	chr14	+	53173895	53177052
chr14	54862662	54865898	chr14	54877039	54879900	CDKN3	uc010aoi.1	chr14	+	54866611	54875507
chr14	55491921	55500295	chr14	55515389	55520812	SOCS4	uc001xbo.2	chr14	+	55493843	55516204
chr14	58745148	58752534	chr14	58762131	58766489	BC112974	uc010apd.1	chr14	-	58752308	58764850
chr14	60705410	60707964	chr14	60711222	60716362	BC035195	uc001xev.1	chr14	-	60706844	60712368
chr14	68139847	68143415	chr14	68157981	68164641	RDH11	uc001xjv.3	chr14	-	68143520	68162510
chr14	75369865	75375013	chr14	75377002	75380822	RPS6KL1	uc001xqx.1	chr14	-	75372346	75376851
chr14	75516635	75519170	chr14	75529361	75531553	ACYP1	uc001xrf.2	chr14	-	75519929	75530736
chr14	77924775	77928699	chr14	77931957	77935059	AHSA1	uc010tvk.1	chr14	+	77924372	77935069
chr14	81643246	81655314	chr14	81683241	81689401	GTF2A1	uc001xvf.1	chr14	-	81646393	81687294
chr14	100754749	100757202	chr14	100768992	100771674	SLC25A29	uc001yha.2	chr14	-	100757454	100772860
chr14	105172288	105174889	chr14	105188137	105190993	INF2	uc010awz.1	chr14	+	105173589	105185947
chr15	40674079	40683588	chr15	40684131	40692224	C15orf23	uc010ucp.1	chr15	+	40674921	40686488
chr15	40731621	40739951	chr15	40753297	40765462	BAHD1	uc001zlt.2	chr15	+	40731919	40760441
chr15	41522629	41527275	chr15	41575215	41577611	CHP	uc001znl.2	chr15	+	41523436	41574081
chr15	42128850	42133555	chr15	42135364	42139036	PLA2G4B	uc001zoq.3	chr15	+	42128978	42140345
chr15	42563951	42566890	chr15	42577773	42583283	GANC	uc010ude.1	chr15	+	42566365	42576587
chr15	42693940	42698488	chr15	42698720	42703314	CAPN3	uc001zpq.1	chr15	+	42694587	42704515
chr15	44955959	44959684	chr15	44967579	44969667	PATL2	uc010uej.1	chr15	-	44957930	44969086
chr15	45453899	45457914	chr15	45495194	45498173	SHF	uc001zuy.2	chr15	-	45459413	45493373
chr15	48622291	48628078	chr15	48632611	48638009	DUT	uc001zwv.2	chr15	+	48624364	48634591
chr15	56986912	56991518	chr15	56996141	56999393	ZNF280D	uc002adx.2	chr15	-	56991559	56999348
chr15	57176057	57187872	chr15	57206946	57217524	LOC145783	uc002adz.1	chr15	-	57178367	57210697
chr15	59952501	59955288	chr15	59979374	59982018	BNIP2	uc010uhb.1	chr15	-	59955063	59981125
chr15	60740913	60745058	chr15	60767965	60772369	NARG2	uc010bgk.2	chr15	-	60743294	60771344
chr15	63440607	63445495	chr15	63445518	63450941	RPS27L	uc002alx.2	chr15	-	63445539	63449480
chr15	64388339	64391558	chr15	64434070	64438016	SNX1	uc002amv.2	chr15	+	64388176	64436431
chr15	66158835	66161583	chr15	66180764	66183402	RAB11A	uc010ujk.1	chr15	+	66161795	66180973
chr15	66680279	66682419	chr15	66785972	66788543	MAP2K1	uc010bhq.2	chr15	+	66679210	66783881
chr15	68500387	68504476	chr15	68520511	68524874	CLN6	uc002arf.2	chr15	-	68499330	68522080
chr15	68568165	68572240	chr15	68581607	68585654	FEM1B	uc002arg.2	chr15	+	68570140	68583639
chr15	69067837	69070965	chr15	69108672	69111458	ANP32A	uc002arl.2	chr15	-	69070876	69113261
chr15	70355701	70361978	chr15	70362093	70366938	KIAA1547	uc010bim.1	chr15	-	70358352	70366946
chr15	72518424	72531344	chr15	72562525	72571046	DKFZp566D244	uc002aud.3	chr15	-	72533522	72563445
chr15	75129767	75136088	chr15	75163908	75167881	SCAMP2	uc002azb.1	chr15	-	75137196	75165670
chr15	75658070	75664945	chr15	75741625	75749756	SIN3A	uc002bai.2	chr15	-	75661721	75743926
chr15	76134186	76138083	chr15	76192925	76200499	UBE2Q2	uc002bbg.2	chr15	+	76135621	76193388
chr15	77334649	77338471	chr15	77361377	77364899	TSPAN3	uc002bcj.2	chr15	-	77338331	77363513
chr15	78574242	78582557	chr15	78588476	78593032	WDR61	uc002bdn.2	chr15	-	78575579	78591940
chr15	79228950	79233188	chr15	79235013	79237607	CTSH	uc010ung.1	chr15	-	79227188	79237420
chr15	80182646	80196794	chr15	80209001	80218406	ST20	uc002bfa.3	chr15	-	80191182	80216077
chr15	83684589	83686265	chr15	83730370	83733896	BTBD1	uc002bjn.2	chr15	-	83685182	83736106
chr15	84111987	84115266	chr15	84233798	84236397	EEN-B2-L1	uc010bms.2	chr15	+	84116090	84234635
chr15	90742086	90747640	chr15	90774307	90779555	SEMA4B	uc002boz.2	chr15	+	90744561	90772890
chr15	90776136	90778907	chr15	90780788	90785809	C15orf58	uc002bpc.2	chr15	+	90777486	90785311
chr15	90892677	90895446	chr15	90903784	90907613	ZNF774	uc002bpk.3	chr15	+	90895476	90904714
chr15	102191177	102194644	chr15	102262940	102265933	TARSL2	uc002bxm.2	chr15	-	102193955	102264645
chr16	630890	644200	chr16	670918	694590	RAB40C	uc002chq.2	chr16	+	640106	679271
chr16	1020218	1024082	chr16	1032040	1037130	BC098409	uc002ckm.1	chr16	-	1025760	1030913
chr16	1260622	1263018	chr16	1268144	1270516	CACNA1H	uc002cku.2	chr16	+	1260034	1271771
chr16	1957251	1960672	chr16	1967769	1970749	HS3ST6	uc002cnf.2	chr16	-	1961466	1968231
chr16	2388444	2392382	chr16	2475201	2480904	ABCA17	uc002cqc.1	chr16	+	2390922	2476700
chr16	2476610	2479983	chr16	2505827	2512757	CCNF	uc002cqd.1	chr16	+	2479394	2508859
chr16	2786514	2790349	chr16	2792454	2795413	LOC100128788	uc002crh.1	chr16	-	2787076	2794798
chr16	3136215	3139647	chr16	3142257	3146156	ZSCAN10	uc002ctv.1	chr16	-	3138894	3142861
chr16	3153446	3158352	chr16	3160966	3163562	MGC3771	uc010btd.2	chr16	-	3160460	3162490
chr16	3161663	3167319	chr16	3170499	3174233	ZNF205	uc002cub.2	chr16	+	3162562	3170516
chr16	3507871	3509771	chr16	3535901	3539878	UNQ2771	uc010btl.2	chr16	+	3507991	3535906
chr16	4301915	4305310	chr16	4320527	4323538	TFAP4	uc010uxg.1	chr16	-	4307187	4323001
chr16	4403379	4406975	chr16	4452880	4456572	CORO7	uc002cwi.1	chr16	-	4407375	4457685
chr16	4556398	4561169	chr16	4562695	4567846	C16orf5	uc002cwu.2	chr16	-	4560678	4564856
chr16	4742478	4745024	chr16	4772693	4776153	ANKS3	uc002cxi.1	chr16	-	4746512	4778079
chr16	8939155	8943792	chr16	8951404	8956810	PMM2	uc002czg.1	chr16	+	8941961	8954274
chr16	10835890	10839183	chr16	10860377	10862862	NUBP1	uc002daa.1	chr16	+	10837697	10863208
chr16	11844422	11848366	chr16	11852652	11855650	ZC3H7A	uc002dbi.2	chr16	-	11844442	11852750
chr16	11927537	11932334	chr16	11942409	11946865	RSL1D1	uc002dbp.1	chr16	-	11928054	11945442
chr16	19530796	19534005	chr16	19565679	19568323	CP110	uc002dgk.3	chr16	+	19535178	19564726
chr16	20809228	20813046	chr16	20816610	20820060	ERI2	uc010vbb.1	chr16	-	20807661	20817795
chr16	25243637	25247044	chr16	25267385	25270456	ZKSCAN2	uc002dod.3	chr16	-	25247323	25268855
chr16	27225779	27228386	chr16	27231951	27234689	JMJD5	uc010bxx.2	chr16	+	27225932	27233089
chr16	29971536	29974593	chr16	29983241	29986323	TMEM219	uc002duy.2	chr16	+	29973350	29984373
chr16	30115333	30119810	chr16	30123218	30127402	GDPD3	uc002dwp.2	chr16	-	30116131	30124878
chr16	30420410	30423288	chr16	30429458	30434013	ZNF771	uc002dyd.2	chr16	+	30418734	30429915
chr16	30583050	30589314	chr16	30592212	30597849	ZNF785	uc002dyu.2	chr16	+	30583575	30595166
chr16	30708644	30710910	chr16	30752082	30754058	SRCAP	uc002dze.1	chr16	+	30710461	30752028
chr16	30884464	30890146	chr16	30902796	30909297	BC073928	uc002dzu.2	chr16	+	30887232	30906537
chr16	30896308	30902918	chr16	30902968	30908599	BCL7C	uc002dzv.2	chr16	-	30899116	30905399
chr16	30932022	30936181	chr16	30958194	30961985	FBXL19	uc002dzz.1	chr16	+	30934391	30960104
chr16	48388703	48393705	chr16	48416034	48420195	SIAH1	uc002efo.1	chr16	-	48394445	48419229
chr16	56456527	56462399	chr16	56484159	56487568	NUDT21	uc002eja.2	chr16	-	56463048	56485261
chr16	58008773	58013078	chr16	58016235	58020253	TEPP	uc002emv.3	chr16	+	58010338	58022015
chr16	58033047	58035673	chr16	58057096	58059206	C16orf57	uc002emz.2	chr16	+	58035304	58055521
chr16	66995161	66997719	chr16	67005158	67007090	CES3	uc002eqt.2	chr16	+	66995137	67009051
chr16	67240411	67243357	chr16	67259076	67261356	LRRC29	uc002ese.2	chr16	-	67241042	67260721
chr16	67561667	67564260	chr16	67580581	67583898	FAM65A	uc002eth.2	chr16	+	67562753	67580688
chr16	67691677	67697414	chr16	67698228	67704779	C16orf48	uc002etv.1	chr16	-	67696849	67698415
chr16	67874767	67883130	chr16	67904236	67909729	NUTF2	uc002eup.2	chr16	+	67880818	67905218
chr16	68020548	68023269	chr16	68025980	68028583	DPEP2	uc010cey.2	chr16	-	68021294	68027279
chr16	68119242	68121249	chr16	68259738	68263340	NFATC3	uc002evm.1	chr16	+	68119374	68260837
chr16	68294813	68299744	chr16	68329941	68334778	SLC7A6	uc002evt.1	chr16	+	68298422	68335722
chr16	70285876	70288887	chr16	70302566	70307390	AARS	uc010vlu.1	chr16	-	70286296	70305899
chr16	71878173	71880285	chr16	71891933	71895424	ATXN1L	uc002fbd.2	chr16	+	71879898	71891231
chr16	71927209	71930992	chr16	71962077	71965220	KIAA0174	uc010cgh.1	chr16	+	71928322	71962906
chr16	81037151	81044642	chr16	81065528	81070966	CENPN	uc002ffx.2	chr16	+	81040102	81065090
chr16	81071649	81074411	chr16	81077568	81081037	ATMIN	uc002fgb.1	chr16	+	81074129	81080951
chr16	81109367	81115509	chr16	81122988	81128884	GCSH	uc002fgd.2	chr16	-	81115930	81129980
chr16	85810609	85812827	chr16	85832290	85835433	COX4NB	uc002fjd.2	chr16	-	85812232	85833148
chr16	88876498	88885748	chr16	88920401	88929133	GALNS	uc002fly.3	chr16	-	88880142	88923374
chr16	89234165	89240053	chr16	89255556	89261247	CDH15	uc002fmt.2	chr16	+	89238162	89261899
chr16	89570590	89576260	chr16	89622808	89628945	SPG7	uc002fnj.2	chr16	+	89574804	89624173
chr16	89891403	89895844	chr16	89938602	89942599	SPIRE2	uc002foz.1	chr16	+	89894906	89937727
chr16	89987534	89990159	chr16	90002254	90004121	TUBB3	uc010ciz.1	chr16	+	89988416	90002505
chr16	90013503	90017880	chr16	90036095	90040037	DEF8	uc002fpn.1	chr16	+	90015150	90034467
chr16	90036673	90044196	chr16	90045722	90050797	AFG3L1	uc002fps.1	chr16	+	90038987	90051109
chr16	90088938	90091289	chr16	90112915	90116085	GAS8	uc010cjc.1	chr16	+	90089007	90111379
chr17	687187	690752	chr17	693437	696262	RNMTL1	uc002frw.2	chr17	+	685512	695740
chr17	1530917	1535050	chr17	1548336	1554322	SCARF1	uc002fsy.1	chr17	-	1537151	1549041
chr17	1551442	1555377	chr17	1584905	1588573	PRPF8	uc002fte.2	chr17	-	1553923	1588176
chr17	1931570	1935306	chr17	1943099	1948051	DPH2L1	uc002ftr.1	chr17	+	1933430	1946689
chr17	2588600	2593753	chr17	2609591	2616558	KIAA0664	uc002fuy.1	chr17	-	2592679	2614927
chr17	4868800	4872524	chr17	4879032	4881629	CAMTA2	uc010ckv.1	chr17	-	4873548	4883916
chr17	6896040	6901216	chr17	6915178	6919609	ALOX12	uc002gdx.3	chr17	+	6899383	6914054
chr17	7106840	7113367	chr17	7116049	7119464	DLG4	uc002geu.2	chr17	-	7106042	7120928
chr17	7233049	7238807	chr17	7250577	7258024	ACAP1	uc002ggd.2	chr17	+	7239847	7254793
chr17	7496323	7500050	chr17	7514527	7518274	FXR2	uc010vud.1	chr17	-	7497547	7518071
chr17	7567642	7570315	chr17	7587614	7592233	TP53	uc010cnh.1	chr17	-	7571719	7590863
chr17	7586882	7592175	chr17	7605582	7610075	WRAP53	uc010vuh.1	chr17	+	7589388	7606819
chr17	7760273	7762970	chr17	7767117	7771761	CYB5D1	uc002gjb.3	chr17	+	7761063	7765598
chr17	7764854	7768886	chr17	7772561	7776693	AK128353	uc010cno.1	chr17	-	7771138	7777031
chr17	7834656	7841515	chr17	7841754	7849064	DKFZp434M0435	uc010vum.1	chr17	+	7840481	7847833
chr17	8012960	8015607	chr17	8019526	8022308	ALOXE3	uc010vup.1	chr17	-	8013233	8022177
chr17	8122429	8131807	chr17	8148936	8154820	C17orf68	uc002gkq.3	chr17	-	8128139	8151413
chr17	17380272	17389088	chr17	17391260	17395887	MED9	uc002grh.1	chr17	+	17380299	17396534
chr17	17583267	17586800	chr17	17714001	17718221	RAI1	uc002grm.2	chr17	+	17584786	17714763
chr17	18125152	18133137	chr17	18145532	18152012	LLGL1	uc002gsp.2	chr17	+	18128935	18148186
chr17	25619476	25623176	chr17	25637782	25643149	WSB1	uc002gzd.1	chr17	+	25621105	25640645
chr17	26923119	26928454	chr17	26934193	26943074	FLJ25006	uc010war.1	chr17	-	26930487	26941211
chr17	27227890	27233552	chr17	27275101	27283292	PHF12	uc010wbb.1	chr17	-	27232270	27277289
chr17	27909507	27915922	chr17	27940824	27946365	ANKRD13B	uc002heh.2	chr17	+	27916800	27941778
chr17	30176887	30179943	chr17	30184810	30187549	C17orf79	uc002hgp.2	chr17	-	30178884	30186326
chr17	30654163	30657423	chr17	30667143	30670777	C17orf75	uc002hhg.2	chr17	-	30658391	30669189
chr17	34859824	34862862	chr17	34888987	34892126	MYO19	uc010wcz.1	chr17	-	34862294	34891039
chr17	34899382	34903942	chr17	34945218	34949717	GGNBP2	uc002hnb.2	chr17	+	34900803	34946274
chr17	35871088	35874474	chr17	35874518	35879362	DUSP14	uc002hnz.2	chr17	+	35869980	35873588
chr17	35969378	35971241	chr17	36001884	36003581	DDX52	uc002hoh.1	chr17	-	35972412	36003487
chr17	36705299	36708910	chr17	36710310	36714050	P140	uc002hqg.2	chr17	-	36707917	36715709
chr17	36916335	36920178	chr17	36953982	36957688	PIP4K2B	uc002hqs.2	chr17	-	36921944	36956158
chr17	37023730	37026565	chr17	37049908	37053780	LASP1	uc010wdy.1	chr17	+	37026111	37055453
chr17	37307708	37314848	chr17	37316932	37322288	ARL5C	uc010wea.1	chr17	-	37313147	37322414
chr17	37333476	37335434	chr17	37354746	37357414	CACNB1	uc002hrn.2	chr17	-	37333389	37353901
chr17	37556967	37560024	chr17	37605171	37608348	MED1	uc002hrv.3	chr17	-	37560539	37607527
chr17	37842219	37845858	chr17	37884394	37886871	ERBB2	uc002hsm.2	chr17	+	37844392	37884914
chr17	37895465	37903504	chr17	37904751	37910787	GRB7	uc002hsr.2	chr17	+	37894186	37903537
chr17	38057190	38061550	chr17	38073399	38075666	GSDMB	uc010cwj.2	chr17	-	38060849	38073574
chr17	38174842	38178903	chr17	38208625	38211251	THRAP4	uc010wet.1	chr17	-	38175350	38209888
chr17	38217650	38219816	chr17	38245674	38248244	THRA	uc010cwp.1	chr17	+	38218162	38245586
chr17	38599579	38602497	chr17	38613595	38616074	IGFBP4	uc002hus.2	chr17	+	38599675	38613981
chr17	38633817	38637978	chr17	38639202	38643004	TNS4	uc002huu.3	chr17	-	38632081	38637127
chr17	39665928	39668557	chr17	39674213	39679704	KRT15	uc002hwy.2	chr17	-	39669997	39675270
chr17	39976171	39979450	chr17	39988508	39992686	NT5C3L	uc002hxx.3	chr17	-	39981423	39988740
chr17	40438254	40440654	chr17	40462262	40464939	STAT5A	uc002hzj.1	chr17	+	40439564	40463958
chr17	40464701	40467510	chr17	40539206	40542493	STAT3	uc002hzk.1	chr17	-	40465342	40540513
chr17	40610939	40613810	chr17	40617988	40622172	ATP6V0A1	uc002hzp.1	chr17	+	40610861	40622984
chr17	40761275	40766404	chr17	40766993	40772011	TUBG1	uc002ian.2	chr17	+	40761357	40767254
chr17	40828982	40833521	chr17	40846048	40852855	CNTNAP1	uc002iay.2	chr17	+	40834631	40852010
chr17	40906984	40909009	chr17	40912376	40916149	LOC100190938	uc002ibd.1	chr17	-	40905523	40913281
chr17	41105563	41110198	chr17	41110878	41117194	AARSD1	uc010cyu.1	chr17	-	41107903	41116460
chr17	41441298	41450545	chr17	41458818	41470024	LOC100130581	uc010wib.1	chr17	-	41447212	41466266
chr17	41892568	41898369	chr17	41907720	41911952	MPP3	uc010czi.1	chr17	-	41895286	41910538
chr17	41925027	41927854	chr17	41930140	41933398	CD300LG	uc002iel.1	chr17	+	41924546	41935128
chr17	42253845	42258030	chr17	42260812	42264817	C17orf65	uc002ifn.2	chr17	-	42253353	42264082
chr17	42421180	42425307	chr17	42426724	42429871	GRN	uc002igp.1	chr17	+	42422490	42430470
chr17	42451406	42455888	chr17	42457954	42464297	ITGA2B	uc002igu.1	chr17	-	42451291	42458429
chr17	46048621	46050545	chr17	46057076	46059668	CDK5RAP3	uc002imq.1	chr17	+	46048428	46059138
chr17	46183960	46186242	chr17	46200589	46203810	SNX11	uc010wlg.1	chr17	+	46184910	46200105
chr17	46799263	46801402	chr17	46806666	46809055	HOXB13	uc002ioa.2	chr17	-	46802128	46806111
chr17	46986076	46990320	chr17	47005276	47008873	UBE2Z	uc002ioi.2	chr17	+	46985766	47006422
chr17	47001646	47005723	chr17	47017137	47021322	SNF8	uc002ioj.2	chr17	-	47007460	47022154
chr17	47782700	47789140	chr17	47863111	47869498	FAM117A	uc010wlz.1	chr17	-	47787688	47865937
chr17	47864414	47872836	chr17	47902174	47909569	MYST2	uc002ipm.2	chr17	+	47866070	47906456
chr17	53034237	53036261	chr17	53044159	53046703	COX11	uc010wng.1	chr17	-	53038479	53046064
chr17	57182699	57185513	chr17	57229234	57234346	SKA2	uc002ixd.2	chr17	-	57187307	57232800
chr17	57781931	57784987	chr17	57915160	57918240	TMEM49	uc002ixu.3	chr17	+	57784862	57917950
chr17	58224816	58227461	chr17	58236156	58239299	CA4	uc002iym.3	chr17	+	58227301	58236904
chr17	59939694	59942713	chr17	60003159	60007024	INTS2	uc002izm.2	chr17	-	59942728	60005377
chr17	60756845	60764180	chr17	60766263	60773011	MRC2	uc002jae.2	chr17	+	60757991	60770950
chr17	61549514	61553227	chr17	61571362	61574347	ACE	uc002jau.1	chr17	+	61554433	61574979
chr17	61817710	61824381	chr17	61844686	61855753	CCDC47	uc002jbs.3	chr17	-	61822610	61851088
chr17	62113679	62119325	chr17	62119447	62122318	BC070350	uc002jdy.1	chr17	-	62116509	62119203
chr17	62221940	62226840	chr17	62331822	62338996	TEX2	uc002jed.2	chr17	-	62224795	62340653
chr17	63547920	63552078	chr17	63552479	63556481	AXIN2	uc002jfj.1	chr17	-	63553923	63556444
chr17	71186368	71189697	chr17	71202857	71204792	COG1	uc002jjg.2	chr17	+	71189172	71204643
chr17	72439241	72441663	chr17	72446584	72448738	AK126429	uc002jku.2	chr17	+	72439223	72446719
chr17	73233808	73237666	chr17	73256059	73259508	GGA3	uc010wrw.1	chr17	-	73233378	73258444
chr17	73265816	73271012	chr17	73281481	73287961	SLC25A19	uc010dge.2	chr17	-	73269061	73282883
chr17	73311042	73314379	chr17	73399617	73402735	GRB2	uc002jnx.3	chr17	-	73314157	73401790
chr17	73510620	73513219	chr17	73518216	73523073	TSEN54	uc002joe.1	chr17	+	73512608	73517851
chr17	73561625	73564512	chr17	73569762	73572226	LLGL2	uc010wsd.1	chr17	+	73559832	73571289
chr17	74076870	74079775	chr17	74096176	74099515	EXOC7	uc010dgv.1	chr17	-	74077086	74097944
chr17	74379842	74384377	chr17	74446173	74450777	UBE2O	uc002jrm.3	chr17	-	74385613	74449288
chr17	74523988	74528491	chr17	74540060	74546251	PRCD	uc002jrw.1	chr17	+	74523667	74541458
chr17	76134745	76141551	chr17	76160504	76166792	C17orf99	uc002jus.3	chr17	+	76142433	76162363
chr17	76181851	76184951	chr17	76198898	76205680	AFMID	uc010dhj.2	chr17	+	76183397	76200104
chr17	76788309	76792879	chr17	76800776	76803466	KIAA1453	uc002jvy.1	chr17	-	76791734	76798617
chr17	77028633	77031427	chr17	77042686	77045306	C1QTNF1	uc002jws.2	chr17	+	77030471	77045869
chr17	78192133	78195778	chr17	78228215	78231586	SLC26A11	uc002jyb.1	chr17	+	78194236	78227297
chr17	78387697	78391150	chr17	78395905	78400444	FLJ35220	uc002jyj.1	chr17	+	78388966	78394333
chr17	79007401	79010438	chr17	79085980	79088978	BAIAP2	uc002jza.2	chr17	+	79008946	79084312
chr17	79616756	79619974	chr17	79622540	79625277	PDE6G	uc002kay.3	chr17	-	79617488	79623607
chr17	79933982	79938325	chr17	79975470	79979748	ASPSCR1	uc002kcw.1	chr17	+	79935425	79975002
chr17	80053475	80058758	chr17	80169005	80175691	CCDC57	uc002kdx.1	chr17	-	80059345	80170689
chr17	80418625	80421454	chr17	80446521	80449598	NARF	uc002kfk.2	chr17	+	80422162	80446141
chr17	80690293	80693787	chr17	80707258	80711298	FN3K	uc010wvs.1	chr17	+	80693451	80709073
chr18	654163	660851	chr18	664252	674201	TYMS	uc010dka.1	chr18	+	657603	673499
chr18	9099316	9108402	chr18	9132066	9139576	NDUFV2	uc002knu.2	chr18	+	9102674	9134336
chr18	12656018	12659900	chr18	12701056	12705601	CEP76	uc002krh.3	chr18	-	12661954	12702703
chr18	12945719	12950670	chr18	12989123	12995651	SEH1L	uc002krq.2	chr18	+	12947982	12987533
chr18	21108122	21110297	chr18	21164975	21167089	NPC1	uc002kum.3	chr18	-	21111463	21166581
chr18	32860773	32864303	chr18	32866983	32870248	PHEX27HOM	uc002kyo.1	chr18	-	32860830	32870165
chr18	32946743	32949878	chr18	32951475	32955529	ZNF396	uc010xcf.1	chr18	-	32946660	32957301
chr18	72168076	72172055	chr18	72173101	72176758	CNDP2	uc002llo.2	chr18	+	72167171	72176570
chr18	72177524	72181158	chr18	72185619	72188162	CPGL	uc010dqs.2	chr18	+	72178047	72188334
chr19	916272	933147	chr19	971586	988176	ARID3A	uc002lql.2	chr19	+	926036	972791
chr19	1037496	1041130	chr19	1063351	1066466	ABCA7	uc002lqw.3	chr19	+	1040101	1065568
chr19	1102946	1106563	chr19	1172642	1175371	SBNO2	uc002lrk.3	chr19	-	1107633	1174282
chr19	1475852	1481446	chr19	1487556	1493094	PCSK4	uc002ltb.1	chr19	-	1481426	1490407
chr19	1601776	1608527	chr19	1650813	1656092	TCF3	uc002ltt.3	chr19	-	1609292	1650286
chr19	1948899	1952692	chr19	1953757	1957364	C19orf34	uc002lum.2	chr19	-	1952527	1954548
chr19	2160585	2169250	chr19	2234682	2244696	DOT1L	uc002lvb.3	chr19	+	2164147	2232576
chr19	3183843	3189535	chr19	3210058	3213120	NCLN	uc002lxh.1	chr19	+	3185874	3209569
chr19	4300474	4306839	chr19	4307759	4311872	FSD1	uc010xie.1	chr19	+	4304590	4311573
chr19	4637808	4642762	chr19	4648403	4651824	TNFAIP8L1	uc002max.2	chr19	+	4639529	4653952
chr19	6752315	6756421	chr19	6759922	6769743	SH2D3A	uc002mft.2	chr19	-	6752174	6767523
chr19	7761692	7765221	chr19	7768616	7772562	FCER2	uc010dvo.2	chr19	-	7761259	7767032
chr19	7916513	7919242	chr19	7926015	7928942	EVI5L	uc002mio.1	chr19	+	7916319	7924076
chr19	10599057	10604386	chr19	10610627	10615890	KEAP1	uc002moq.1	chr19	-	10596795	10613481
chr19	10764969	10768726	chr19	10794747	10799300	ILF3	uc002mpm.2	chr19	+	10764936	10796443
chr19	11544708	11548891	chr19	11555856	11559360	PRKCSH	uc002mrv.1	chr19	+	11546455	11558412
chr19	11613373	11618336	chr19	11638319	11643170	ECSIT	uc010dyc.1	chr19	-	11616743	11639680
chr19	11649101	11652725	chr19	11660060	11665453	CNN1	uc002msc.1	chr19	+	11649578	11661138
chr19	11924826	11927929	chr19	11944972	11949034	ZNF440	uc002msp.1	chr19	+	11925106	11946016
chr19	12808800	12814501	chr19	12830434	12835040	TNPO2	uc002mup.2	chr19	-	12810008	12832529
chr19	12842580	12852766	chr19	12856846	12871476	ASNA1	uc002muv.2	chr19	+	12848305	12859138
chr19	13075160	13078387	chr19	13082216	13085637	DAND5	uc010dyz.1	chr19	+	13075972	13085567
chr19	13104186	13110518	chr19	13202115	13213695	NFIX	uc002mwd.2	chr19	+	13106583	13209609
chr19	13858299	13861139	chr19	13873544	13876336	CCDC130	uc002mxc.1	chr19	+	13858752	13874106
chr19	14195821	14205867	chr19	14221488	14232163	PRKACA	uc002myb.2	chr19	-	14202508	14224992
chr19	14490241	14494566	chr19	14515416	14518426	CD97	uc002myl.2	chr19	+	14492212	14519533
chr19	14624011	14632743	chr19	14635021	14642969	DNAJB1	uc010xnr.1	chr19	-	14625581	14640049
chr19	15223064	15225919	chr19	15233879	15237871	ILVBL	uc002nam.2	chr19	-	15225786	15236577
chr19	15488752	15492921	chr19	15525986	15530986	AKAP8L	uc002naw.1	chr19	-	15490858	15529833
chr19	16640925	16643640	chr19	16652311	16654366	CHERP	uc002nej.2	chr19	-	16642794	16652940
chr19	16679195	16686488	chr19	16736949	16739794	MED26	uc002nen.1	chr19	-	16685717	16739015
chr19	16737449	16741084	chr19	16768241	16772372	C19orf42	uc002neo.1	chr19	-	16741574	16770968
chr19	17356697	17365560	chr19	17367391	17372246	USHBP1	uc002nfr.1	chr19	-	17360848	17369281
chr19	17400573	17405275	chr19	17411875	17417783	ABHD8	uc002ngb.3	chr19	-	17402940	17414282
chr19	17951661	17955265	chr19	17956523	17961499	JAK3	uc010xpy.1	chr19	-	17953243	17958841
chr19	18057399	18062095	chr19	18108081	18112546	KCNN1	uc002nht.2	chr19	+	18062110	18109929
chr19	18264844	18268072	chr19	18277506	18279256	PIK3R2	uc010ebi.1	chr19	+	18266266	18281304
chr19	18312530	18319182	chr19	18329520	18338113	PDE4C	uc002nif.3	chr19	-	18318771	18331988
chr19	18666965	18674770	chr19	18676405	18685095	C19orf50	uc002njo.2	chr19	+	18668603	18680184
chr19	19143822	19146431	chr19	19167618	19170858	ARMC6	uc002nlc.2	chr19	+	19144470	19168978
chr19	19229446	19234006	chr19	19241302	19251526	TMEM161A	uc002nlg.2	chr19	-	19230430	19249267
chr19	19294693	19300778	chr19	19301483	19306941	LOC729991	uc010ecb.2	chr19	-	19297701	19303400
chr19	19300744	19305499	chr19	19311426	19319217	RFXANK	uc002nls.2	chr19	+	19303007	19312677
chr19	19365186	19370293	chr19	19370853	19374199	HAPLN4	uc002nmb.2	chr19	-	19366452	19373651
chr19	19410438	19413019	chr19	19430058	19433455	SF4	uc010xqs.1	chr19	-	19412467	19431307
chr19	19728765	19732435	chr19	19733111	19738509	LPAR2	uc002nnb.3	chr19	-	19734467	19739039
chr19	19751259	19757786	chr19	19771999	19776232	ATP13A1	uc002nng.2	chr19	-	19756011	19772925
chr19	30302940	30309512	chr19	30309919	30314590	CCNE1	uc002nsn.2	chr19	+	30302900	30315218
chr19	34893563	34897026	chr19	34918184	34920778	PDCD2L	uc002nvj.2	chr19	+	34895302	34917070
chr19	35250739	35254707	chr19	35259499	35263513	ZNF599	uc010xsd.1	chr19	-	35253787	35264110
chr19	35615421	35617747	chr19	35623176	35627958	LGI4	uc002nxz.1	chr19	-	35615577	35624668
chr19	36359256	36363302	chr19	36368429	36371554	APLP1	uc010xsz.1	chr19	+	36359137	36370698
chr19	36481222	36488314	chr19	36488613	36493930	SDHAF1	uc002ocp.2	chr19	+	36486100	36487213
chr19	38823410	38828693	chr19	38863569	38867873	CATSPERG	uc002oih.3	chr19	+	38826442	38861588
chr19	39935972	39937694	chr19	39965602	39968199	SUPT5H	uc002olo.3	chr19	+	39936185	39967306
chr19	39989819	39993497	chr19	39996220	39998915	DLL3	uc010egq.2	chr19	+	39989556	39996292
chr19	40218825	40222024	chr19	40225949	40228732	CLC	uc002omh.2	chr19	-	40221895	40228668
chr19	40882933	40887092	chr19	40891207	40895589	HIPK4	uc002onp.2	chr19	-	40885178	40896094
chr19	40900949	40906608	chr19	40907759	40912304	PRX	uc002onq.2	chr19	-	40899671	40910195
chr19	40947836	40953426	chr19	40969681	40973823	BLVRB	uc002onw.2	chr19	-	40953690	40971725
chr19	41084074	41087113	chr19	41095673	41098662	SHKBP1	uc010xvm.1	chr19	+	41084367	41097304
chr19	41167372	41175149	chr19	41187518	41198541	NUMBL	uc010xvq.1	chr19	-	41171813	41196027
chr19	41194805	41199772	chr19	41221674	41225965	ADCK4	uc002oor.2	chr19	-	41197433	41222790
chr19	41281718	41286533	chr19	41301356	41311124	RAB4B	uc002opc.1	chr19	+	41281656	41302847
chr19	41282175	41285758	chr19	41311471	41315456	EGLN2	uc010ehd.2	chr19	+	41284170	41314336
chr19	41766631	41773289	chr19	41812153	41817614	HNRNPUL1	uc002opz.3	chr19	+	41768390	41813810
chr19	42346423	42349202	chr19	42351468	42355829	DMRTC2	uc002orr.1	chr19	+	42349023	42356395
chr19	42804981	42810862	chr19	42813585	42819261	PRR19	uc002oth.1	chr19	+	42806283	42814965
chr19	44097500	44104541	chr19	44116930	44130620	SRRM5	uc002oxb.2	chr19	+	44100737	44118649
chr19	44242856	44247897	chr19	44257002	44261155	C19orf61	uc010eiy.1	chr19	-	44242001	44259142
chr19	45349623	45352192	chr19	45393065	45396087	PVRL2	uc002ozw.1	chr19	+	45349392	45392485
chr19	45580763	45587822	chr19	45593153	45598212	GEMIN7	uc002pap.1	chr19	+	45582517	45594782
chr19	45667124	45670268	chr19	45680467	45683235	TRAPPC6A	uc002pav.2	chr19	-	45666186	45681485
chr19	45864035	45869643	chr19	45870309	45873403	ERCC2	uc010xxj.1	chr19	-	45867000	45873845
chr19	45894329	45896512	chr19	45906504	45909365	PPP1R13L	uc002pbp.2	chr19	-	45897910	45909607
chr19	45903789	45914445	chr19	45921369	45932772	ERCC1	uc002pbs.1	chr19	-	45912871	45927177
chr19	46115140	46117730	chr19	46144179	46146939	DKFZp564P0662	uc010xxn.1	chr19	-	46119718	46148175
chr19	46122314	46126292	chr19	46141437	46144107	EML2	uc010xxo.1	chr19	-	46124069	46142669
chr19	46849001	46852701	chr19	46892896	46898285	PPP5C	uc002pem.2	chr19	+	46850293	46894103
chr19	48213574	48216787	chr19	48246426	48249853	EHD2	uc002phj.3	chr19	+	48216600	48246390
chr19	48672363	48674625	chr19	48697896	48701043	C19orf68	uc002pic.3	chr19	+	48673948	48700877
chr19	48704175	48709518	chr19	48755985	48762651	CARD8	uc002pii.3	chr19	-	48711343	48759150
chr19	48835496	48839096	chr19	48865733	48870812	UNQ5922	uc002piw.1	chr19	-	48835145	48867186
chr19	49222467	49232850	chr19	49234364	49243635	RASIP1	uc002pki.2	chr19	-	49223842	49243970
chr19	49374041	49386838	chr19	49401077	49409687	TULP2	uc002pkz.2	chr19	-	49384221	49401996
chr19	49470279	49474761	chr19	49493894	49497441	GYS1	uc010xzy.1	chr19	-	49471382	49496566
chr19	49496843	49499224	chr19	49521155	49523875	RUVBL2	uc002plq.1	chr19	+	49496818	49519182
chr19	49953752	49958882	chr19	49975770	49980440	ALDH16A1	uc002pnt.2	chr19	+	49956472	49974304
chr19	49972498	49975271	chr19	49989923	49993271	FLT3LG	uc010yau.1	chr19	+	49977485	49989484
chr19	50206797	50209873	chr19	50212429	50216179	CPT1C	uc010eni.1	chr19	+	50209165	50216988
chr19	50392338	50397668	chr19	50430647	50436011	IL4I1	uc002pqu.1	chr19	-	50390638	50432786
chr19	50885653	50889428	chr19	50917283	50921948	POLD1	uc002psb.3	chr19	+	50887592	50921270
chr19	51324739	51330198	chr19	51333522	51340343	KLK15	uc002ptl.2	chr19	-	51328545	51334779
chr19	51385573	51388832	chr19	51392318	51396932	KRSP1	uc002ptw.2	chr19	-	51385353	51392441
chr19	51595306	51599591	chr19	51610050	51613197	CTU1	uc010eop.2	chr19	-	51600863	51611647
chr19	51889722	51893942	chr19	51894149	51900029	BC143997	uc010ycx.1	chr19	-	51891544	51893817
chr19	52798639	52802182	chr19	52825182	52828059	ZNF480	uc010ydl.1	chr19	+	52800425	52829172
chr19	54604465	54610689	chr19	54615394	54620393	TFPT	uc010yej.1	chr19	-	54610319	54619055
chr19	55669094	55672573	chr19	55676633	55678240	C19orf51	uc002qji.1	chr19	-	55670030	55677920
chr19	55767517	55772398	chr19	55789828	55793738	HSPBP1	uc002qjx.2	chr19	-	55773591	55791224
chr19	56597558	56600385	chr19	56629038	56634094	ZNF787	uc010eth.1	chr19	-	56598731	56632649
chr19	58109885	58113148	chr19	58114249	58117988	ZNF530	uc002qpk.2	chr19	+	58111252	58119637
chr19	58258686	58263804	chr19	58269736	58274501	ZNF776	uc002qqa.2	chr19	+	58258163	58269525
chr19	58837488	58841116	chr19	58852508	58855272	ZSCAN22	uc002qsc.2	chr19	+	58838384	58853712
chr19	58983194	58992392	chr19	59006999	59014915	SLC27A5	uc002qtb.2	chr19	-	58990879	59010630
chr2	6988352	6993698	chr2	7003150	7007318	CMPK2	uc002qyo.2	chr2	-	6988452	7005936
chr2	25014837	25021457	chr2	25039893	25045773	CENPO	uc002rfn.2	chr2	+	25016249	25039439
chr2	25452336	25455060	chr2	25475656	25479258	DNMT3A	uc002rgb.2	chr2	-	25455845	25475180
chr2	27479286	27481903	chr2	27486724	27489388	SLC30A3	uc002rjk.2	chr2	-	27477440	27485960
chr2	27531184	27537700	chr2	27538595	27546356	MPV17	uc002rjq.2	chr2	-	27532361	27545389
chr2	27542154	27551344	chr2	27573084	27581427	GTF3C2	uc002rju.1	chr2	-	27548720	27579359
chr2	28603860	28611982	chr2	28612404	28615606	AK055918	uc002rlz.1	chr2	-	28607275	28617539
chr2	37456368	37460309	chr2	37478130	37482518	C2orf56	uc002rqa.3	chr2	+	37458773	37476301
chr2	38975148	38982473	chr2	39000165	39007764	GEMIN6	uc002rrb.2	chr2	+	38978675	39009104
chr2	43256006	43258663	chr2	43264072	43266795	CR600703	uc002rsu.1	chr2	-	43254991	43266682
chr2	47285787	47290884	chr2	47401621	47403774	CALM2	uc010fbd.2	chr2	-	47293081	47403740
chr2	61702096	61705705	chr2	61710751	61714999	XPO1	uc002sbg.2	chr2	-	61705069	61713104
chr2	65282690	65286733	chr2	65298799	65302957	CEP68	uc002sdj.2	chr2	+	65283494	65301312
chr2	65556150	65558160	chr2	65656953	65659484	SPRED2	uc010fcx.1	chr2	-	65559120	65659656
chr2	67625121	67629368	chr2	67632495	67635938	ETAA1	uc002sdz.1	chr2	+	67624441	67637533
chr2	68383351	68386339	chr2	68405104	68407698	PNO1	uc002seh.2	chr2	+	68385004	68403089
chr2	69687564	69689559	chr2	69692808	69695565	BX640963	uc010fdj.1	chr2	-	69686413	69693664
chr2	70184325	70187076	chr2	70189430	70192906	ASPRV1	uc002sfz.3	chr2	-	70187225	70189397
chr2	70186600	70190567	chr2	70313432	70318177	BC040598	uc002sga.2	chr2	-	70189395	70314147
chr2	71206738	71210795	chr2	71216951	71222038	UNQ1882	uc010fdy.2	chr2	-	71213069	71221834
chr2	73510976	73515227	chr2	73516772	73520426	AK125051	uc002sjc.1	chr2	+	73511661	73518113
chr2	85886740	85890485	chr2	85890962	85895474	SFTPB	uc002sqj.2	chr2	-	85885984	85895374
chr2	96873259	96876819	chr2	96908137	96913044	LOC285033	uc002svn.2	chr2	+	96874140	96907701
chr2	97270355	97272803	chr2	97296227	97299529	KIAA1310	uc002swp.1	chr2	-	97271056	97297482
chr2	99755030	99760884	chr2	99769021	99772906	C2orf15	uc002szk.2	chr2	+	99758184	99767926
chr2	99797117	99800134	chr2	99810699	99813384	MRPL30	uc002szt.1	chr2	+	99797577	99813862
chr2	99939367	99941723	chr2	99951245	99954484	TXNDC9	uc002taa.1	chr2	-	99938005	99952860
chr2	128262614	128267545	chr2	128280339	128284643	DKFZp761G0123	uc010fma.2	chr2	-	128262259	128284087
chr2	128396062	128398700	chr2	128403094	128404905	LIMS2	uc002tow.2	chr2	-	128395996	128405753
chr2	128457547	128460515	chr2	128567239	128569779	WDR33	uc002tpg.1	chr2	-	128461807	128568745
chr2	162164598	162167856	chr2	162268728	162271891	PSMD14	uc002ubu.2	chr2	+	162164785	162268226
chr2	169926874	169931119	chr2	169937870	169941542	DHRS9	uc002uer.1	chr2	+	169925962	169938404
chr2	170417849	170420560	chr2	170424230	170430363	FASTKD1	uc002uey.2	chr2	-	170416896	170430424
chr2	171784385	171789962	chr2	171821380	171827816	GORASP2	uc002ugj.2	chr2	+	171784981	171823639
chr2	172863189	172870519	chr2	172946500	172952655	MAP1D	uc002uhk.2	chr2	+	172864803	172945586
chr2	178411379	178414361	chr2	178415359	178419727	TTC30B	uc002uln.2	chr2	-	178414885	178417524
chr2	183988386	183990737	chr2	184027696	184029728	NUP35	uc002upf.2	chr2	+	183989082	184026407
chr2	190632138	190639565	chr2	190646675	190650810	ORMDL1	uc002urb.3	chr2	-	190634993	190648108
chr2	197665069	197668196	chr2	197672824	197675701	C2orf66	uc002utv.2	chr2	-	197670009	197675000
chr2	201675756	201683086	chr2	201686855	201694691	BZW1	uc002uwc.2	chr2	+	201676646	201688559
chr2	201752714	201756143	chr2	201763752	201766477	NIF3L1	uc002uwm.2	chr2	+	201754049	201768655
chr2	202094998	202096780	chr2	202104699	202108100	CASP8	uc002uxn.2	chr2	+	202098165	202107646
chr2	219133795	219136776	chr2	219139403	219144099	PNKD	uc002vhm.1	chr2	+	219135114	219137668
chr2	219838023	219841900	chr2	219843157	219846699	LOC151300	uc002vjh.3	chr2	+	219841005	219842643
chr2	220324465	220327002	chr2	220331520	220333282	SPEG	uc002vlq.2	chr2	+	220325547	220331583
chr2	220434404	220438937	chr2	220440785	220445083	INHA	uc002vmk.1	chr2	+	220436953	220440427
chr2	223507083	223510489	chr2	223518284	223522534	FARSB	uc002vng.1	chr2	-	223510347	223520827
chr2	224821983	224824523	chr2	224833610	224836485	MRPL44	uc002vnr.3	chr2	+	224822120	224832429
chr2	237993334	237995419	chr2	238003144	238007738	COPS8	uc010fys.1	chr2	+	237994083	238004527
chr2	239073081	239084066	chr2	239108028	239116352	ILKAP	uc002vxv.2	chr2	-	239079043	239112324
chr2	239143260	239151192	chr2	239193485	239199496	PER2	uc002vyc.2	chr2	-	239152679	239197207
chr2	242087301	242093114	chr2	242108976	242112740	PPP1R7	uc010fzm.1	chr2	+	242089023	242109282
chr2	242251684	242256734	chr2	242293005	242298348	SEPT2	uc002wbc.2	chr2	+	242254722	242293439
chr2	242641857	242644433	chr2	242664539	242668171	ING5	uc002wcd.2	chr2	+	242641455	242668890
chr20	1413774	1421620	chr20	1445657	1450800	NSFL1C	uc002wfc.2	chr20	-	1422812	1448417
chr20	2813958	2818864	chr20	2819702	2823742	FAM113A	uc002wgz.1	chr20	-	2815970	2821332
chr20	2839216	2842331	chr20	2844350	2848792	VPS16	uc002whg.2	chr20	+	2843101	2847379
chr20	3125665	3129162	chr20	3138645	3140896	FASTKD5	uc002whz.2	chr20	-	3127166	3140540
chr20	3135920	3145266	chr20	3149803	3158813	ProSAPiP1	uc002wib.1	chr20	-	3143272	3154192
chr20	5921826	5925585	chr20	5930496	5933765	KIAA1153	uc010gbn.1	chr20	-	5922498	5931173
chr20	7997431	8003514	chr20	8006129	8012817	AK097836	uc002wmy.1	chr20	+	8000548	8008603
chr20	32881826	32886073	chr20	32887441	32892015	AHCY	uc010get.2	chr20	-	32881271	32891215
chr20	33587771	33591672	chr20	33593125	33596101	FLJ00177	uc002xbj.2	chr20	-	33590214	33594378
chr20	34251035	34254418	chr20	34285328	34290289	NFS1	uc002xdt.1	chr20	-	34256610	34287111
chr20	34540806	34544638	chr20	34548024	34551981	SCAND1	uc002xep.2	chr20	-	34541551	34547394
chr20	35200267	35203910	chr20	35237700	35240143	C20orf24	uc002xfo.2	chr20	+	35202955	35240958
chr20	42163944	42166314	chr20	42169417	42172116	KIAA0681	uc002xkp.2	chr20	+	42168220	42170534
chr20	43990011	43993282	chr20	44034308	44038595	DBNDD2	uc002xnx.2	chr20	+	43991700	44039245
chr20	44657046	44659665	chr20	44667535	44671378	SLC12A5	uc002xra.2	chr20	+	44657820	44669799
chr20	44685588	44689969	chr20	44716109	44719897	NCOA5	uc002xre.2	chr20	-	44689626	44718580
chr20	48552426	48554691	chr20	48567592	48570499	RNF114	uc010zyo.1	chr20	+	48552913	48569435
chr20	48886022	48889363	chr20	48890690	48894266	AK307192	uc010zyr.1	chr20	+	48884034	48895366
chr20	49546213	49551316	chr20	49572013	49578552	DPM1	uc002xvw.1	chr20	-	49551404	49575060
chr20	54986583	54990402	chr20	55028064	55031027	CASS4	uc002xxq.3	chr20	+	54987313	55028930
chr20	60734670	60738473	chr20	60755802	60758704	SS18L1	uc002ycc.1	chr20	+	60736473	60755957
chr20	60755932	60758789	chr20	60776793	60779067	GTPBP5	uc002yce.3	chr20	+	60758080	60777808
chr20	61479964	61483292	chr20	61491545	61494419	TCFL5	uc002ydq.2	chr20	-	61482847	61493115
chr20	61504489	61508047	chr20	61556996	61558758	DIDO1	uc002ydr.1	chr20	-	61509089	61557855
chr20	62336516	62341930	chr20	62369007	62374841	ZGPAT	uc002ygn.3	chr20	+	62339904	62370459
chr20	62494841	62498139	chr20	62521532	62524704	TPD52L2	uc002ygy.2	chr20	+	62496589	62522888
chr20	62721915	62724267	chr20	62729372	62733163	OPRL1	uc002yif.3	chr20	+	62724040	62731991
chr21	30244480	30248717	chr21	30254545	30258847	N6AMT1	uc002ymo.1	chr21	-	30244512	30257693
chr21	30427482	30430394	chr21	30433666	30436324	CCT8	uc002ymz.2	chr21	-	30428649	30435188
chr21	33052438	33055288	chr21	33071213	33073890	KIAA1172	uc002ypf.1	chr21	-	33056307	33074231
chr21	33641902	33645181	chr21	33649022	33651388	C21orf45	uc011adn.1	chr21	-	33642709	33651376
chr21	34856785	34860425	chr21	34863174	34867871	DNAJC28	uc002yrv.2	chr21	-	34860238	34863790
chr21	36228649	36231960	chr21	36248173	36251042	RUNX1	uc002yur.1	chr21	-	36231630	36253010
chr21	40553454	40557456	chr21	40682892	40687176	BRWD1	uc002yxk.1	chr21	-	40557403	40685556
chr21	40750235	40754352	chr21	40768076	40770628	WRB	uc002yxs.2	chr21	+	40752212	40769814
chr21	43520492	43525200	chr21	43528967	43534243	C21orf128	uc002zak.2	chr21	-	43522243	43528644
chr21	44393389	44397868	chr21	44444505	44450114	PKNOX1	uc002zcp.1	chr21	+	44394642	44449067
chr21	45429712	45433999	chr21	45522896	45529122	TRAPPC10	uc002zea.2	chr21	+	45432205	45526430
chr21	46493052	46496379	chr21	46563543	46565903	ADAR2g	uc002zgp.2	chr21	+	46494492	46566210
chr21	46700211	46702674	chr21	46706207	46708733	KIAA0958	uc011afp.1	chr21	-	46702076	46707811
chr21	47579366	47581441	chr21	47603875	47605706	C21orf56	uc011afu.1	chr21	-	47581062	47604373
chr21	47704395	47708420	chr21	47713514	47717582	C21orf57	uc002ziv.2	chr21	+	47706266	47717664
chr21	47717404	47720722	chr21	47740886	47746438	C21orf58	uc002zja.2	chr21	-	47720344	47740739
chr21	48054236	48058001	chr21	48079083	48082780	PRMT2	uc002zjw.2	chr21	+	48055526	48080055
chr22	19162129	19169505	chr22	19274380	19280950	CLTCL1	uc002zpb.2	chr22	-	19166988	19279239
chr22	20860707	20863825	chr22	20914855	20920236	MED15	uc002zsn.1	chr22	+	20861885	20918975
chr22	21270336	21272687	chr22	21306201	21309059	CRKL	uc002ztg.1	chr22	+	21271713	21308035
chr22	22104264	22113416	chr22	22217620	22224505	MAPK1	uc002zvn.2	chr22	-	22113948	22221970
chr22	22564892	22568804	chr22	22569813	22574551	10a.872B9 (locus 10a)	uc011aio.1	chr22	+	22569183	22569654
chr22	24084482	24088207	chr22	24091769	24095231	ZNF70	uc002zxs.2	chr22	-	24083772	24093279
chr22	24109058	24113336	chr22	24127654	24131149	MMP11	uc002zxx.2	chr22	+	24115035	24126502
chr22	26867892	26870926	chr22	26871597	26876173	HPS4	uc003aco.1	chr22	-	26871335	26875551
chr22	26888040	26891310	chr22	26906877	26909766	TFIP11	uc003acr.2	chr22	-	26887893	26908343
chr22	29665589	29670159	chr22	29686550	29689191	EWSR1	uc003aes.3	chr22	+	29663997	29686670
chr22	30793698	30796409	chr22	30812029	30813919	SEC14L2	uc003ahq.2	chr22	+	30792932	30812962
chr22	30947026	30952194	chr22	30953690	30959543	GAL3ST1	uc003aig.1	chr22	-	30950623	30956748
chr22	31478371	31481367	chr22	31500336	31503939	SMTN	uc011ale.1	chr22	+	31478845	31500609
chr22	32329388	32335571	chr22	32336708	32343906	C22orf24	uc003aly.2	chr22	-	32329507	32341336
chr22	35652545	35654526	chr22	35660715	35662310	HMG2L1	uc011amh.1	chr22	+	35653444	35661596
chr22	41825782	41835397	chr22	41839008	41845901	TOB2	uc003azz.1	chr22	-	41829491	41843027
chr22	41852186	41860124	chr22	41862559	41867052	PHF5A	uc003bab.2	chr22	-	41855721	41864708
chr22	41972917	41975697	chr22	41983514	41985945	PMM1	uc003bal.2	chr22	-	41972889	41985871
chr22	41997732	42005344	chr22	42010437	42017728	PPPDE2	uc003ban.1	chr22	-	41996935	42016916
chr22	42083443	42086507	chr22	42090314	42092600	C22orf46	uc003bax.1	chr22	+	42086546	42094140
chr22	42973346	42978408	chr22	43008368	43013354	POLDIP3	uc003bcu.2	chr22	-	42979727	43010962
chr22	43009007	43014462	chr22	43035898	43047242	CYB5R3	uc011aps.1	chr22	-	43014813	43040637
chr22	46434103	46437426	chr22	46440487	46443463	LOC100271722	uc011aqv.1	chr22	-	46435788	46440748
chr22	46645669	46652160	chr22	46653783	46657763	PKDREJ	uc003bhh.2	chr22	-	46651560	46659219
chr22	46730982	46735761	chr22	46745658	46748709	TRMU	uc011arb.1	chr22	+	46731297	46750216
chr22	50644628	50651555	chr22	50652072	50658318	dJ402G11.5	uc010hap.2	chr22	+	50644745	50656044
chr22	50656353	50658814	chr22	50683451	50686870	TUBGCP6	uc003bkb.1	chr22	-	50656117	50683400
chr22	50659780	50664090	chr22	50665363	50668710	KIAA1669	uc003bkd.1	chr22	-	50661415	50664618
chr22	50944905	50950463	chr22	50956047	50966636	NCAPH2	uc003blq.3	chr22	+	50946644	50958190
chr3	4935112	4938830	chr3	5018274	5022302	AK056892	uc003bqe.1	chr3	-	4938492	5021646
chr3	9941316	9944801	chr3	9955523	9959871	IL17RE	uc003btu.2	chr3	+	9944302	9958082
chr3	9955883	9958820	chr3	9974675	9976722	IL17RC	uc003btz.2	chr3	+	9958763	9975313
chr3	10052606	10055801	chr3	10063988	10066513	CICE	uc003bus.2	chr3	-	10055925	10067820
chr3	12833101	12843478	chr3	12870350	12875999	CAND2	uc003bxk.2	chr3	+	12838170	12876313
chr3	14218358	14224734	chr3	14238907	14243029	LSM3	uc003byn.2	chr3	+	14220336	14239836
chr3	15470875	15475900	chr3	15481272	15484932	EAF1	uc003bzu.2	chr3	+	15469063	15484119
chr3	15789474	15792569	chr3	15794649	15797578	KIAA0379	uc003cao.2	chr3	-	15788686	15798098
chr3	16304681	16308027	chr3	16341745	16344493	OXNAD1	uc010her.1	chr3	+	16306713	16343375
chr3	44787096	44791436	chr3	44797464	44803079	KIAA1143	uc011bac.1	chr3	-	44790238	44803173
chr3	44956746	44961542	chr3	44962252	44967225	ZDHHC3	uc003coe.2	chr3	-	44956753	44960339
chr3	45066056	45071423	chr3	45072565	45078342	CLEC3B	uc003cok.3	chr3	+	45067758	45077562
chr3	46959005	46961789	chr3	47016255	47019685	CCDC12	uc003cqo.2	chr3	-	46963219	47018270
chr3	47537303	47543925	chr3	47549598	47557776	C3orf75	uc003crj.2	chr3	-	47537130	47554807
chr3	47867135	47871638	chr3	47884570	47887611	KIAA0890	uc010hjr.1	chr3	+	47866475	47887342
chr3	48487745	48490928	chr3	48507452	48510660	ATRIP	uc011bbj.1	chr3	+	48488140	48507708
chr3	48670764	48674544	chr3	48698929	48702803	CELSR3	uc003cul.2	chr3	-	48673901	48700348
chr3	49062154	49067981	chr3	49128951	49132856	QRICH1	uc010hkq.2	chr3	-	49067143	49130902
chr3	49130019	49133719	chr3	49139545	49142279	QARS	uc011bcd.1	chr3	-	49133365	49141944
chr3	49141210	49144220	chr3	49153234	49156017	USP19	uc003cwa.2	chr3	-	49145483	49155553
chr3	49158149	49166168	chr3	49166363	49171688	LAMB2	uc003cwe.2	chr3	-	49158547	49170599
chr3	49941945	49947861	chr3	49964712	49970141	MON1A	uc003cxz.2	chr3	-	49946302	49967445
chr3	50315087	50319481	chr3	50321802	50325239	C3orf45	uc003cyz.2	chr3	+	50316517	50325544
chr3	50597009	50601269	chr3	50602729	50605113	C3orf18	uc003dar.2	chr3	-	50595462	50605182
chr3	52230039	52234196	chr3	52236127	52242387	ALAS1	uc003dcx.1	chr3	+	52232115	52236750
chr3	52262375	52268246	chr3	52270366	52274345	TWF2	uc003ddd.2	chr3	-	52262626	52273183
chr3	52283046	52286146	chr3	52310824	52313812	WDR82	uc003ddl.2	chr3	-	52288437	52312659
chr3	52445710	52451315	chr3	52451741	52455746	PHF7	uc003ddy.2	chr3	+	52444526	52457656
chr3	52462441	52466581	chr3	52481054	52483159	SEMA3G	uc003dea.1	chr3	-	52467267	52479043
chr3	63844344	63852454	chr3	63894716	63900006	SCA7	uc010hnu.1	chr3	+	63850232	63898599
chr3	69098594	69102750	chr3	69127329	69130993	UBA3	uc003dno.2	chr3	-	69103881	69129524
chr3	88197168	88201570	chr3	88204371	88207068	C3orf38	uc003dqw.2	chr3	+	88198892	88207113
chr3	93779162	93784721	chr3	93784932	93791200	MST077	uc003drk.2	chr3	+	93781854	93783246
chr3	98228978	98234732	chr3	98235993	98241855	CLDND1	uc003dsp.2	chr3	-	98234317	98241358
chr3	112708430	112711427	chr3	112732811	112735876	GTPBP8	uc011bhy.1	chr3	+	112709799	112733906
chr3	119186243	119189555	chr3	119215703	119218960	MDSRP	uc011bja.1	chr3	+	119187784	119213552
chr3	119387433	119389444	chr3	119393932	119397317	COX17	uc003ecz.1	chr3	-	119388371	119396243
chr3	124477862	124484045	chr3	124603744	124607360	ITGB5	uc003eho.2	chr3	-	124481795	124606144
chr3	128176220	128179140	chr3	128184388	128186937	DNAJB8	uc003ekk.1	chr3	-	128181281	128186091
chr3	133465852	133469783	chr3	133471795	133476120	TF	uc011bls.1	chr3	+	133464799	133474655
chr3	150452566	150460091	chr3	150475752	150483574	SIAH2	uc003eyi.2	chr3	-	150458910	150481263
chr3	169662120	169664864	chr3	169677294	169682337	LOC100128164	uc011bpp.1	chr3	-	169661773	169684522
chr3	169886429	169890904	chr3	169896401	169900155	PHC3	uc003fgp.3	chr3	-	169887513	169899537
chr3	169891262	169895266	chr3	169896780	169899600	AX747865	uc003fgr.1	chr3	-	169895949	169898340
chr3	170602997	170605732	chr3	170623109	170626295	EIF5A2	uc003fhd.2	chr3	-	170606204	170626426
chr3	178961430	178967225	chr3	178967360	178970302	KCNMB3	uc003fjm.2	chr3	-	178960554	178969403
chr3	186257898	186261993	chr3	186282657	186286599	TBCCD1	uc003fqg.2	chr3	-	186263857	186285141
chr3	195587338	195591112	chr3	195596966	195600289	TNK2	uc003fvq.1	chr3	-	195590235	195596561
chr3	195775087	195781112	chr3	195806132	195810328	TFRC	uc003fvz.3	chr3	-	195776155	195808961
chr3	196043015	196046706	chr3	196061951	196066451	TM4SF19	uc003fwj.2	chr3	-	196042956	196065258
chr3	196046919	196051231	chr3	196053241	196055569	AK124973	uc003fwk.1	chr3	+	196045220	196052441
chr3	196437410	196440905	chr3	196464933	196468682	PIGX	uc003fwx.3	chr3	+	196439245	196462874
chr3	196667013	196674996	chr3	196694628	196698576	PIGZ	uc003fxh.2	chr3	-	196673214	196695704
chr4	1207031	1209938	chr4	1240960	1243998	CTBP1	uc003gcu.1	chr4	-	1205227	1242908
chr4	1238004	1246805	chr4	1279798	1288475	AK125775	uc003gcy.1	chr4	+	1243279	1282079
chr4	8581776	8584128	chr4	8590195	8592685	GPR78	uc003glk.2	chr4	+	8582290	8589518
chr4	10436820	10442109	chr4	10453962	10457876	ZNF518B	uc003gmn.2	chr4	-	10441504	10459032
chr4	15682774	15685413	chr4	15691736	15693825	LOC285550	uc003gof.3	chr4	+	15683351	15692062
chr4	24528819	24532938	chr4	24584706	24587789	DHX15	uc003gqx.2	chr4	-	24529088	24586184
chr4	38608922	38612274	chr4	38662349	38665840	FLJ13197	uc003gte.1	chr4	-	38614321	38666249
chr4	68563907	68569021	chr4	68584891	68590557	LOC550112	uc003hdk.2	chr4	+	68566995	68588220
chr4	73919855	73923746	chr4	73932924	73936555	COX18	uc003hgm.1	chr4	-	73920415	73935472
chr4	73932413	73938405	chr4	74120693	74126649	ANKRD17	uc003hgp.2	chr4	-	73940502	74124502
chr4	78077821	78081031	chr4	78093227	78095807	CCNG2	uc003hkq.3	chr4	+	78078356	78091210
chr4	81119048	81121457	chr4	81127614	81130828	PRDM8	uc003hmc.3	chr4	+	81118656	81125480
chr4	87854383	87857849	chr4	87866968	87869833	AFF1	uc003hqi.1	chr4	+	87857561	87869723
chr4	99798928	99802072	chr4	99848264	99852659	EIF4E	uc011cea.1	chr4	-	99799606	99850243
chr4	100810623	100827791	chr4	100865444	100874425	DNAJB14	uc003hvl.2	chr4	-	100820711	100867879
chr4	113196064	113198105	chr4	113204868	113207355	TIFA	uc003ial.2	chr4	-	113196782	113207059
chr4	123371372	123375640	chr4	123378588	123381717	IL2	uc003ier.2	chr4	-	123372629	123377650
chr4	129729294	129734540	chr4	129782960	129791658	PHF17	uc003igj.2	chr4	+	129730778	129785785
chr4	139982972	139984946	chr4	140003531	140005547	ELF2	uc010ioh.2	chr4	-	139987181	140005647
chr4	159585070	159588545	chr4	159589644	159595031	C4orf46	uc003iqa.2	chr4	-	159587830	159593202
chr4	159592371	159595255	chr4	159600184	159604551	ETFDH	uc010iqq.2	chr4	+	159593276	159601236
chr4	159626201	159628653	chr4	159643323	159646079	PPID	uc003iqc.2	chr4	-	159630279	159644552
chr4	169907640	169911190	chr4	169930012	169933043	CBR4	uc003iry.2	chr4	-	169908743	169931422
chr4	174449641	174453639	chr4	174454727	174458378	Nbla00301	uc011ckd.1	chr4	+	174451608	174460124
chr4	185763693	185769780	chr4	185770600	185777270	BC016366	uc003iwy.1	chr4	-	185765736	185776806
chr4	186315907	186318641	chr4	186335060	186340278	UFSP2	uc003ixn.2	chr4	-	186320693	186339661
chr5	859293	862429	chr5	890724	894347	BRD9	uc003jbl.2	chr5	-	863850	891402
chr5	891587	893945	chr5	918238	921056	TRIP13	uc003jbr.2	chr5	+	893003	918158
chr5	6596139	6601978	chr5	6603251	6607428	SAKI	uc003jds.2	chr5	-	6599354	6604995
chr5	40752834	40759871	chr5	40793841	40803866	PRKAA1	uc003jmb.2	chr5	-	40759481	40798297
chr5	43481800	43486706	chr5	43511486	43517226	C5orf34	uc003jnz.1	chr5	-	43486809	43515187
chr5	64918270	64923492	chr5	64924156	64929429	C5orf44	uc010iwu.1	chr5	+	64920557	64926532
chr5	68512355	68516868	chr5	68528060	68533660	MRPS36	uc003jvq.2	chr5	+	68513572	68525983
chr5	74638485	74641131	chr5	74648840	74652146	HMGCR	uc010izn.1	chr5	+	74641398	74646774
chr5	90676294	90680859	chr5	90711811	90718660	LOC100129716	uc003kka.3	chr5	+	90676163	90716531
chr5	96035534	96040371	chr5	96075768	96079687	CAST	uc011cup.1	chr5	+	96038495	96075822
chr5	133488228	133490721	chr5	133508502	133511951	SKP1	uc003kzc.3	chr5	-	133492083	133512724
chr5	133706341	133708361	chr5	133725803	133728873	UBE2B	uc003kzh.2	chr5	+	133706869	133727798
chr5	134074059	134081207	chr5	134081210	134088388	CAMLG	uc003kzt.2	chr5	+	134074205	134087841
chr5	134207669	134215050	chr5	134238477	134243772	TXNDC15	uc011cxv.1	chr5	+	134209459	134236952
chr5	137503983	137508336	chr5	137509814	137515963	BRD8	uc010jes.1	chr5	-	137503331	137514358
chr5	137619089	137624816	chr5	137672857	137677645	CDC25C	uc011cyp.1	chr5	-	137620958	137674044
chr5	137838114	137840971	chr5	137876068	137879246	ETF1	uc011cyv.1	chr5	-	137841787	137877400
chr5	138723589	138728014	chr5	138729364	138733119	LOC389333	uc011czc.1	chr5	-	138727634	138730885
chr5	139137133	139140348	chr5	139142504	139145611	DQ592953	uc011czf.1	chr5	+	139140558	139140583
chr5	139554949	139557617	chr5	139619554	139621592	C5orf32	uc003lfd.2	chr5	+	139554652	139623372
chr5	140025050	140029924	chr5	140042541	140044924	IK	uc003lgq.2	chr5	+	140027383	140042064
chr5	140050954	140057036	chr5	140062525	140067903	HARS	uc003lgu.2	chr5	-	140053490	140064923
chr5	140997174	141000074	chr5	141015237	141017938	HDAC3	uc003llf.2	chr5	-	141000442	141016423
chr5	141049419	141051761	chr5	141060567	141063049	ARAP3	uc003llo.1	chr5	-	141051668	141060409
chr5	141348638	141350679	chr5	141370648	141373858	RNF14	uc003lly.2	chr5	+	141346436	141368752
chr5	151119267	151125823	chr5	151135086	151139341	ATOX1	uc003luk.2	chr5	-	151122383	151138210
chr5	170812916	170821870	chr5	170831416	170851227	NPM1	uc011dex.1	chr5	+	170814119	170837887
chr5	173034621	173041335	chr5	173041552	173044470	BOD1	uc003mcq.2	chr5	-	173034147	173043666
chr5	175595849	175599724	chr5	175600741	175603992	DQ578341	uc011dfi.1	chr5	+	175601551	175601583
chr5	175813665	175819346	chr5	175835446	175843390	CLTB	uc003meh.2	chr5	-	175819456	175843540
chr5	176556550	176562546	chr5	176726963	176733064	NSD1	uc003mft.3	chr5	+	176560079	176727213
chr5	177556060	177559207	chr5	177571980	177574313	RMND5B	uc003mim.2	chr5	+	177558027	177575478
chr5	179122873	179128898	chr5	179155888	179164921	CANX	uc011dgp.1	chr5	+	179125427	179158637
chr5	180271906	180274510	chr5	180287951	180290911	ZFP62	uc003mmn.3	chr5	-	180274610	180287684
chr6	2988902	2990939	chr6	3012809	3015555	NQO2	uc003mup.1	chr6	+	2988200	3015940
chr6	3062522	3065846	chr6	3117287	3119989	RIPK1	uc003muv.3	chr6	+	3064121	3115419
chr6	4020118	4022120	chr6	4056131	4059470	PRPF4B	uc011dhv.1	chr6	+	4021926	4061381
chr6	4115012	4117735	chr6	4133700	4137127	PECI	uc010jnr.1	chr6	-	4117541	4133935
chr6	4133729	4136828	chr6	4155883	4158586	AK092451	uc003mwg.1	chr6	+	4136305	4157619
chr6	7327176	7331850	chr6	7388133	7392296	CAGE1	uc003mxi.2	chr6	-	7326888	7389942
chr6	7389647	7392078	chr6	7418136	7421059	RIOK1	uc003mxn.2	chr6	+	7390061	7418268
chr6	13268970	13278598	chr6	13326296	13332818	TBC1D7	uc011dis.1	chr6	-	13275080	13328770
chr6	13571528	13575473	chr6	13600705	13603709	SIRT5	uc003naw.2	chr6	+	13574791	13605968
chr6	20400840	20405554	chr6	20482504	20485591	E2F3	uc003ncz.2	chr6	+	20402136	20483151
chr6	26384661	26390027	chr6	26390440	26394308	BTN2A2	uc011dki.1	chr6	+	26390232	26394197
chr6	29564780	29575712	chr6	29592511	29597522	GABBR1	uc003nms.3	chr6	-	29570005	29596005
chr6	31126958	31132315	chr6	31135299	31140140	POU5F1	uc003nsv.2	chr6	-	31132114	31138451
chr6	31367093	31372215	chr6	31384392	31389234	MICA	uc003ntk.1	chr6	+	31371370	31383090
chr6	31433256	31436894	chr6	31440318	31442022	HCG26	uc003ntm.2	chr6	+	31439005	31440184
chr6	31894637	31897740	chr6	31910021	31912431	C2	uc003nyf.2	chr6	+	31895265	31913448
chr6	32819485	32824261	chr6	32828568	32833175	PSMB9	uc003sga.2	chr6	+	32821937	32827626
chr6	32862324	32864869	chr6	32869854	32872932	AK057104	uc003oci.1	chr6	+	32862499	32871535
chr6	33048887	33051085	chr6	33054248	33057417	HLA-DPB1	uc011dqq.1	chr6	+	33048448	33053681
chr6	33129416	33132246	chr6	33146976	33149043	COL11A2	uc010jul.1	chr6	-	33130468	33145670
chr6	35991723	35998793	chr6	36060568	36068863	MAPK14	uc011dth.1	chr6	+	35995453	36065829
chr6	36163215	36166247	chr6	36200158	36203502	BRPF3	uc003olv.3	chr6	+	36164549	36200566
chr6	39154908	39158754	chr6	39195824	39198738	KCNK5	uc003oon.2	chr6	-	39156747	39197251
chr6	41702875	41708969	chr6	41709194	41715354	PGC	uc003ora.1	chr6	-	41704451	41715121
chr6	41869570	41873256	chr6	41888797	41890853	TRFP	uc003orj.2	chr6	-	41873092	41888681
chr6	41901466	41911305	chr6	42006076	42016469	CCND3	uc003orp.2	chr6	-	41902671	42016610
chr6	42145680	42149894	chr6	42163945	42168319	GUCA1B	uc003orz.2	chr6	-	42151022	42162694
chr6	42945347	42948362	chr6	42980813	42984122	MEA1	uc010jyc.1	chr6	-	42948081	42981660
chr6	42951856	42953719	chr6	42980365	42983410	PPP2R5D	uc003otg.2	chr6	+	42952329	42980078
chr6	43147225	43151937	chr6	43188051	43191333	CUL9	uc003ouk.2	chr6	+	43149921	43192324
chr6	43554477	43558356	chr6	43584545	43587636	POLH	uc003ovr.3	chr6	+	43554524	43582458
chr6	43809656	43812698	chr6	43822023	43826812	AK097853	uc003owl.1	chr6	-	43812607	43820054
chr6	44139410	44142184	chr6	44147448	44151075	CAPN11	uc011dvn.1	chr6	+	44144317	44151003
chr6	56347192	56349659	chr6	56354834	56357986	KIAA0728	uc003pda.3	chr6	-	56348353	56357231
chr6	56819331	56822345	chr6	56888159	56891969	BEND6	uc010kab.2	chr6	+	56819772	56892138
chr6	64347568	64349664	chr6	64406239	64409987	PHF3	uc010kaf.1	chr6	+	64345724	64404654
chr6	86322096	86325209	chr6	86349720	86353694	SYNCRIP	uc003pkz.2	chr6	-	86323692	86351169
chr6	88381197	88391198	chr6	88407466	88413401	AKIRIN2	uc003pmk.2	chr6	-	88384578	88411985
chr6	96023075	96026419	chr6	96054455	96060317	MANEA	uc003poo.1	chr6	+	96025412	96057326
chr6	106543895	106546938	chr6	106557343	106560378	PRDM1	uc003pre.2	chr6	+	106546814	106557814
chr6	147704406	147707731	chr6	147708554	147712454	BC043173	uc003qmb.2	chr6	+	147708803	147711601
chr6	151772837	151776392	chr6	151787367	151789470	C6orf211	uc003qok.1	chr6	+	151773421	151791232
chr6	163832623	163836662	chr6	163990745	163995290	QKI	uc003que.2	chr6	+	163835674	163991169
chr7	915755	924949	chr7	932956	942950	C7orf20	uc003sjl.1	chr7	+	916190	936071
chr7	2279763	2288994	chr7	2289142	2298240	NUDT1	uc003slp.1	chr7	+	2281856	2290780
chr7	2396194	2399310	chr7	2413474	2418303	EIF3B	uc003slx.2	chr7	+	2394473	2420375
chr7	2582880	2589419	chr7	2590557	2596649	C7orf27	uc003smj.1	chr7	-	2582147	2595146
chr7	5812370	5815650	chr7	5819494	5823462	BC040728	uc003spb.2	chr7	-	5817158	5819899
chr7	19731441	19734937	chr7	19746529	19749489	TWISTNB	uc003sup.1	chr7	-	19735084	19748660
chr7	23454670	23458150	chr7	23506703	23509888	IMP-3	uc003swh.1	chr7	-	23452863	23509995
chr7	26187891	26202612	chr7	26221953	26234536	NFE2L3	uc003sxq.2	chr7	+	26191846	26226754
chr7	30051700	30053923	chr7	30066992	30070866	FKBP14	uc003tal.1	chr7	-	30052883	30066268
chr7	42949469	42953377	chr7	42968770	42974191	C7orf25	uc010kxr.2	chr7	-	42948873	42971805
chr7	42957672	42964554	chr7	42965146	42973842	DKFZp686D09174	uc003thz.1	chr7	-	42957685	42971805
chr7	44239483	44243228	chr7	44254618	44257860	YKT6	uc003tkm.2	chr7	+	44240577	44253892
chr7	45218836	45222622	chr7	45223367	45227583	RAMP3	uc003tnc.2	chr7	+	45216891	45223847
chr7	66091949	66098427	chr7	66102890	66108956	KCTD7	uc003tvd.3	chr7	+	66093889	66105550
chr7	72950038	72955970	chr7	72969042	72973929	BCL7B	uc003tye.1	chr7	-	72950685	72971581
chr7	73237427	73240881	chr7	73245411	73249261	hCPE-R	uc003tzh.1	chr7	+	73242073	73247014
chr7	75623978	75626314	chr7	75631144	75634110	MKSTYX	uc003uef.2	chr7	-	75625655	75634722
chr7	90031707	90034906	chr7	90044777	90048799	CLDN12	uc010leq.2	chr7	+	90032795	90045266
chr7	97499263	97501796	chr7	97600194	97603082	MGC72080	uc010lfp.1	chr7	-	97503666	97601638
chr7	99072080	99078067	chr7	99085076	99089969	ZNF789	uc003uqq.1	chr7	+	99070514	99085217
chr7	99265340	99268493	chr7	99275691	99278651	CYP3A5	uc003urt.2	chr7	-	99268541	99277606
chr7	99580447	99585207	chr7	99587129	99590928	BC022382	uc003usi.2	chr7	+	99578384	99591588
chr7	99609453	99615014	chr7	99637646	99644800	ZKSCAN1	uc003usk.1	chr7	+	99613218	99635403
chr7	99753295	99755968	chr7	99764966	99767548	GAL3ST4	uc003utt.2	chr7	-	99756865	99765735
chr7	99994345	99998458	chr7	100026000	100028986	ZCWPW1	uc003uut.2	chr7	-	99998495	100026302
chr7	100136557	100138359	chr7	100155320	100157667	AGFG2	uc003uvg.1	chr7	+	100136833	100153990
chr7	100236529	100239648	chr7	100253974	100255733	ACTL6B	uc003uvy.2	chr7	-	100240727	100254084
chr7	100398676	100402755	chr7	100422988	100426913	EPHB4	uc003uwm.1	chr7	-	100400186	100423148
chr7	100448977	100453392	chr7	100463620	100466806	SLC12A9	uc003uwp.2	chr7	+	100450357	100464633
chr7	100549832	100554872	chr7	100605467	100612701	MUC3B	uc003uxk.1	chr7	+	100550749	100608372
chr7	100767265	100771934	chr7	100778904	100783010	SERPINE1	uc003uxt.2	chr7	+	100770378	100782542
chr7	100845614	100849082	chr7	100852501	100856274	DKFZp564O1822	uc010lhs.2	chr7	-	100849258	100855936
chr7	100862517	100867092	chr7	100867176	100870862	ZNHIT1	uc003uye.2	chr7	+	100860984	100867469
chr7	100883935	100885996	chr7	100893008	100895659	FIS1	uc010lht.2	chr7	-	100882894	100895593
chr7	101912928	101918938	chr7	101926951	101931541	Nbla10317	uc003uyz.2	chr7	+	101917444	101927249
chr7	102096319	102099955	chr7	102103151	102107969	ALKBH4	uc003uzl.2	chr7	-	102096696	102105288
chr7	104740053	104743335	chr7	104744660	104749506	MLL5	uc010lje.1	chr7	+	104741871	104751002
chr7	105727974	105732250	chr7	105749699	105753643	SYPL1	uc003vdo.2	chr7	-	105730952	105752758
chr7	112121071	112126030	chr7	112126598	112131851	C7orf53	uc011kmq.1	chr7	+	112120907	112130935
chr7	116309582	116311428	chr7	116367770	116371575	MET	uc010lkg.2	chr7	+	116312458	116371987
chr7	123321030	123322945	chr7	123388213	123390483	WASL	uc003vkz.2	chr7	-	123322000	123389116
chr7	129801357	129804646	chr7	129841836	129844892	TMEM209	uc003vpn.2	chr7	-	129804554	129845338
chr7	134330307	134333437	chr7	134360992	134363223	BPGM	uc003vrv.2	chr7	+	134331530	134364565
chr7	134828601	134837699	chr7	134849714	134856248	TMEM140	uc003vsi.2	chr7	+	134832765	134850966
chr7	140700390	140704443	chr7	140712773	140714840	MRPS33	uc003vwd.3	chr7	-	140705961	140714479
chr7	142417938	142421976	chr7	142424654	142428008	TCRBV14S1	uc010lol.1	chr7	+	142423182	142423934
chr7	142565283	142569709	chr7	142571275	142575616	TRPV6	uc003wbw.1	chr7	-	142568959	142574345
chr7	148982530	148985624	chr7	148986289	148990797	ZNF783	uc011kup.1	chr7	+	148982371	148990914
chr7	149520138	149525012	chr7	149525705	149530067	SSPO	uc003wgi.1	chr7	+	149519232	149525074
chr7	150550808	150553153	chr7	150558456	150560989	ABP1	uc003whz.1	chr7	+	150549572	150558379
chr7	151107292	151110697	chr7	151110890	151115365	BC043579	uc003wkd.1	chr7	+	151106321	151110938
chr7	151792731	151796062	chr7	151805896	151809303	GALNT11	uc011kvn.1	chr7	+	151791100	151805372
chr7	152133699	152137759	chr7	152138359	152143092	FABP5L3	uc003wlb.2	chr7	+	152133979	152140098
chr7	158520204	158523962	chr7	158533060	158537001	KIAA1228	uc003wny.1	chr7	-	158523688	158535754
chr8	11202674	11205995	chr8	11206285	11210798	BC038546	uc003wtr.1	chr8	-	11203436	11204999
chr8	11628045	11631391	chr8	11641711	11643829	NEIL2	uc003wug.2	chr8	+	11627171	11644854
chr8	22434020	22436046	chr8	22453738	22456434	PDLIM2	uc003xby.2	chr8	+	22436642	22451803
chr8	23108888	23111905	chr8	23118889	23121542	DKFZp434C191	uc003xde.2	chr8	+	23112328	23119512
chr8	26433315	26435921	chr8	26496864	26500876	DPYSL2	uc011lag.1	chr8	+	26435420	26501120
chr8	30884400	30887198	chr8	30888915	30893096	PURG	uc003xin.2	chr8	-	30888357	30890317
chr8	33341411	33345895	chr8	33352004	33358871	MAK16	uc003xjj.2	chr8	+	33342684	33358777
chr8	33361761	33363719	chr8	33369287	33372676	C8orf41	uc003xjn.1	chr8	-	33360946	33370617
chr8	48171892	48175366	chr8	48649107	48652421	KIAA0146	uc003xqd.2	chr8	+	48173541	48648473
chr8	66556053	66558778	chr8	66615634	66618485	MTFR1	uc011lep.1	chr8	+	66556887	66620572
chr8	67576102	67579251	chr8	67593788	67596736	C8orf44	uc003xwo.1	chr8	+	67579850	67593235
chr8	97245215	97251231	chr8	97271689	97276511	MTERFD1	uc003yhs.1	chr8	-	97251644	97273796
chr8	103839572	103843466	chr8	103874674	103877109	AZIN1	uc003ykx.2	chr8	-	103838536	103876397
chr8	104382282	104385358	chr8	104387344	104390689	CTHRC1	uc011lhq.1	chr8	+	104383785	104388664
chr8	121455278	121461246	chr8	121461422	121467773	MTBP	uc003ypb.1	chr8	+	121457665	121465069
chr8	124261353	124265873	chr8	124284184	124288485	ZHX1	uc003yqe.2	chr8	-	124260696	124286547
chr8	125983916	125986929	chr8	125992858	125996868	ZNF572	uc003yrr.2	chr8	+	125985538	125991628
chr8	144391873	144396358	chr8	144410227	144415786	TOP1MT	uc003yxz.2	chr8	-	144391529	144417050
chr8	145046195	145052341	chr8	145055024	145058825	PARP10	uc003zak.3	chr8	-	145051320	145059496
chr8	145594423	145602169	chr8	145615755	145623977	ADCK5	uc003zcg.2	chr8	+	145597525	145618451
chr8	146050056	146061219	chr8	146065166	146082641	ZNF7	uc003zeg.3	chr8	+	146052902	146068605
chr8	146076605	146080936	chr8	146123738	146127681	COMMD5	uc010mgf.2	chr8	-	146075932	146126846
chr8	146110844	146114815	chr8	146125653	146129074	ZNF250	uc003zes.2	chr8	-	146114518	146126846
chr9	32542228	32544632	chr9	32548348	32552651	TOPORS	uc003zrb.2	chr9	-	32540542	32552601
chr9	33024405	33027419	chr9	33040839	33043581	DNAJA1	uc003zsd.1	chr9	+	33025208	33039062
chr9	33436028	33440542	chr9	33445082	33449205	AQP3	uc003zsv.1	chr9	-	33441153	33447590
chr9	35672063	35674610	chr9	35681228	35683055	CA9	uc003zxo.3	chr9	+	35673914	35681152
chr9	79008991	79011604	chr9	79014498	79020251	LAMR1P15	uc011lsj.1	chr9	+	79013514	79014954
chr9	95855552	95862102	chr9	95867626	95876894	C9orf89	uc004atd.2	chr9	+	95858449	95875564
chr9	95880402	95885163	chr9	95893735	95897991	NINJ1	uc004atg.3	chr9	-	95883771	95896570
chr9	98629164	98632859	chr9	98633356	98639163	NAG11	uc004avs.2	chr9	-	98632565	98638259
chr9	100817966	100819958	chr9	100840027	100843917	NANS	uc004ayc.2	chr9	+	100818681	100845364
chr9	100845133	100849564	chr9	100852067	100857931	TRIM14	uc011luz.1	chr9	-	100846636	100854843
chr9	104148610	104154266	chr9	104158623	104161916	MRPL50	uc011lvj.1	chr9	-	104151122	104160919
chr9	107525129	107529466	chr9	107535609	107541773	NIPSNAP3B	uc004bci.2	chr9	+	107526450	107536290
chr9	114425504	114428377	chr9	114434361	114436820	GNG10	uc011lws.1	chr9	+	114423860	114432508
chr9	115229867	115232512	chr9	115246545	115248998	AK131020	uc004bge.1	chr9	-	115232002	115248956
chr9	116025697	116028856	chr9	116035797	116038156	CDC26	uc004bgw.2	chr9	-	116029289	116037869
chr9	116035504	116039547	chr9	116056957	116059661	PRPF4	uc004bgx.2	chr9	+	116037973	116055054
chr9	116129585	116133857	chr9	116136214	116139486	HDHD3	uc004bhi.1	chr9	-	116135697	116138341
chr9	117237838	117241306	chr9	117266050	117268540	DFNB31	uc004bjb.2	chr9	-	117240600	117267730
chr9	124099936	124103806	chr9	124130541	124133716	STOM	uc004blh.2	chr9	-	124101353	124132545
chr9	125867067	125872401	chr9	125873222	125877564	DKFZp779O012	uc004bnp.3	chr9	-	125871773	125877756
chr9	127961194	127965382	chr9	127993352	127999385	RABEPK	uc004bpi.2	chr9	+	127962816	127996437
chr9	130210951	130214633	chr9	130261749	130264959	LRSAM1	uc004brb.1	chr9	+	130213791	130265778
chr9	130249827	130253393	chr9	130255423	130260396	AX747547	uc004brf.1	chr9	-	130254830	130256970
chr9	131258527	131262993	chr9	131264918	131268234	ODF2	uc004bvh.2	chr9	+	131258134	131263238
chr9	131462574	131471034	chr9	131480870	131488313	PKN3	uc004bvw.2	chr9	+	131464801	131483198
chr9	131871079	131873910	chr9	131900478	131904310	PPP2R4	uc011mbo.1	chr9	+	131873612	131905584
chr9	132647609	132651310	chr9	132803939	132806638	FNBP1	uc004byw.1	chr9	-	132649465	132805473
chr9	135457334	135460837	chr9	135462893	135465463	BARHL1	uc004cbp.1	chr9	+	135457992	135465640
chr9	135544983	135551573	chr9	135557768	135566635	GTF3C4	uc010mzv.2	chr9	+	135545727	135565468
chr9	135855055	135858425	chr9	135868926	135871324	GFI1B	uc004ccg.2	chr9	+	135853893	135867083
chr9	138369440	138372841	chr9	138381220	138385328	KIAA0649	uc004cfr.1	chr9	+	138371647	138380739
chr9	138381978	138385296	chr9	138388609	138390897	C9orf116	uc004cfs.1	chr9	-	138387025	138391761
chr9	139699818	139702141	chr9	139734169	139736082	C9orf86	uc004cji.1	chr9	+	139702191	139735639
chr9	139835281	139842012	chr9	139842308	139848601	C8G	uc004cka.2	chr9	+	139839697	139841426
chr9	140446439	140449718	chr9	140469897	140473461	WDR85	uc004cnk.1	chr9	-	140449360	140473387
chrX	11775360	11778407	chrX	11783041	11787159	MSL3	uc004cuv.1	chrX	+	11776277	11786096
chrX	13670274	13673475	chrX	13676205	13679593	TCEANC	uc010nee.1	chrX	+	13671224	13681679
chrX	20142867	20144574	chrX	20156449	20159699	EIF1AX	uc004czt.2	chrX	-	20142636	20159966
chrX	24165503	24169326	chrX	24232813	24236979	ZFX	uc004dbe.2	chrX	+	24167761	24232627
chrX	40505436	40508422	chrX	40593947	40596922	MED14	uc004dex.3	chrX	-	40508796	40594804
chrX	48658839	48661199	chrX	48667083	48671085	KIAA0901	uc004dkr.1	chrX	+	48660470	48664871
chrX	48774909	48777418	chrX	48813135	48815312	OTUD5	uc004dlt.3	chrX	-	48779304	48814893
chrX	49090366	49093628	chrX	49103428	49106967	CCDC22	uc011mna.1	chrX	+	49091940	49103881
chrX	53399720	53403021	chrX	53447622	53451566	SMC1A	uc004dsg.2	chrX	-	53401071	53449618
chrX	70500937	70507315	chrX	70514079	70522238	NONO	uc004dzo.2	chrX	+	70503041	70521016
chrX	100601427	100605332	chrX	100645870	100647746	BTK	uc010nno.2	chrX	-	100604434	100645770
chrX	101852631	101857046	chrX	101857171	101861050	ARMCX5	uc004ejg.2	chrX	+	101854095	101859083
chrX	119367411	119373651	chrX	119374618	119380132	CXorf42	uc004esm.2	chrX	-	119370310	119379122
chrX	123091864	123098479	chrX	123230491	123235682	STAG2	uc004eua.2	chrX	+	123094474	123236503
chrX	129348934	129351374	chrX	129402650	129405341	ZNF280C	uc010nrf.1	chrX	-	129349166	129402873
chrX	152932468	152936947	chrX	152938155	152941160	PNCK	uc011myt.1	chrX	-	152935189	152938743
chrX	153234421	153244131	chrX	153244943	153253262	TMEM187	uc004fjq.2	chrX	+	153237990	153248646
chrX	153760070	153764716	chrX	153773233	153775153	G6PD	uc004flx.1	chrX	-	153759605	153775233

## Sheet: Prom-Term Interactions MCF7
interA_1_chrom	interA_1_start	interA_1_end	interA_2_chrom	interA_2_start	interA_2_end	GeneName	transcriptID	chrom	strand	txStart	txEnd
chr1	993367	996608	chr1	998230	1001567	BC033949	uc001acl.1	chr1	+	995116	1001833
chr1	1013864	1018358	chr1	1048967	1052075	C1orf159	uc001acu.2	chr1	-	1017197	1051736
chr1	1014864	1018322	chr1	1023766	1028713	UNQ2998	uc010nyd.1	chr1	-	1017197	1026945
chr1	1242484	1247481	chr1	1258294	1260404	CPSF3L	uc001aee.1	chr1	-	1246964	1260046
chr1	1282494	1286594	chr1	1286823	1291939	MXRA8	uc001aew.2	chr1	-	1288071	1293927
chr1	1320340	1323037	chr1	1325013	1328554	FLJ00183	uc010nym.1	chr1	-	1321090	1327029
chr1	2514856	2521635	chr1	2522746	2526712	C1orf93	uc001aju.1	chr1	+	2518248	2522902
chr1	3366866	3370399	chr1	3398966	3402117	ARHGEF16	uc001akg.3	chr1	+	3371146	3397675
chr1	6263456	6267489	chr1	6277523	6281756	RNF207	uc001amg.2	chr1	+	6266188	6281351
chr1	6672412	6674442	chr1	6682529	6684992	PHF13	uc001aob.3	chr1	+	6673755	6684092
chr1	8920547	8925627	chr1	8929456	8934652	ENO1	uc001api.1	chr1	-	8921062	8931356
chr1	16159624	16164194	chr1	16171772	16177742	FLJ37453	uc001axj.2	chr1	-	16160709	16174642
chr1	24103502	24106481	chr1	24110302	24113997	C1orf128	uc001bhq.2	chr1	+	24104875	24114720
chr1	26144887	26148429	chr1	26148963	26153933	LOC646471	uc010oeu.1	chr1	-	26146444	26150097
chr1	26436690	26443833	chr1	26443895	26453004	PDIK1L	uc010oew.1	chr1	+	26437655	26452024
chr1	26757367	26760994	chr1	26796697	26800876	DHDDS	uc001bmk.2	chr1	+	26758801	26797793
chr1	27666815	27671781	chr1	27672168	27678085	FLJ00227	uc001bnx.2	chr1	+	27671363	27678538
chr1	28878083	28882345	chr1	28904471	28909849	TRNAU1AP	uc001bqh.2	chr1	+	28879528	28905056
chr1	33219451	33221755	chr1	33235635	33240420	KIAA1522	uc010ohm.1	chr1	+	33219686	33240571
chr1	38270357	38275899	chr1	38323878	38330185	MTF1	uc001cce.1	chr1	-	38275238	38325292
chr1	43388739	43393020	chr1	43421778	43424851	SLC2A1	uc001cik.2	chr1	-	43391045	43424847
chr1	44443323	44446273	chr1	44455808	44457650	B4GALT2	uc001clg.2	chr1	+	44444865	44456839
chr1	45264194	45272608	chr1	45278043	45289663	BTBD19	uc010old.1	chr1	+	45274153	45279171
chr1	51760615	51763776	chr1	51795663	51798517	TTC39A	uc001csn.2	chr1	-	51761211	51796234
chr1	93301248	93305329	chr1	93308053	93310345	RPL5	uc001dpd.2	chr1	+	93301783	93306626
chr1	109755414	109759766	chr1	109779520	109784390	SARS	uc001dwu.1	chr1	+	109756539	109780785
chr1	110161144	110167296	chr1	110168106	110173505	AMPD2	uc010ovs.1	chr1	+	110166653	110171117
chr1	111983388	111987622	chr1	111989190	111992878	WDR77	uc001ebb.2	chr1	-	111982512	111991830
chr1	113158395	113164969	chr1	113214433	113219948	CAPZA1	uc001ecj.1	chr1	+	113162074	113214241
chr1	113216660	113220416	chr1	113238104	113243317	MOV10	uc001ecl.2	chr1	+	113217047	113243357
chr1	114300278	114303223	chr1	114351974	114356702	RSBN1	uc001edq.2	chr1	-	114304454	114355070
chr1	115241950	115246239	chr1	115248203	115251569	NRAS	uc001efh.3	chr1	-	115247078	115252391
chr1	115257986	115261034	chr1	115292376	115295411	CSDE1	uc001efi.2	chr1	-	115259537	115292828
chr1	116938277	116942339	chr1	116942501	116947979	ATP1A1	uc001egh.2	chr1	+	116943469	116947394
chr1	117653395	117658019	chr1	117660936	117665455	TRIM45	uc001egz.2	chr1	-	117653676	117664411
chr1	118146883	118151736	chr1	118164654	118169340	FAM46C	uc001ehe.2	chr1	+	118148603	118171010
chr1	145469264	145473815	chr1	145474134	145477416	ANKRD34A	uc001enq.1	chr1	+	145470507	145475647
chr1	145523049	145526185	chr1	145527213	145531064	ITGA10	uc001enz.1	chr1	+	145524989	145529319
chr1	150238665	150248021	chr1	150250513	150255873	C1orf54	uc001euc.2	chr1	+	150244772	150253325
chr1	150292624	150296528	chr1	150296546	150301685	PRP3	uc009wlo.2	chr1	+	150293927	150301343
chr1	151005235	151011133	chr1	151018459	151022133	BNIPL	uc009wmi.2	chr1	+	151009028	151020076
chr1	151481649	151489329	chr1	151506916	151514804	CGN	uc009wmw.2	chr1	+	151483861	151511165
chr1	151511523	151514119	chr1	151553602	151556465	TUFT1	uc001eyl.2	chr1	+	151512780	151556058
chr1	151762236	151765030	chr1	151766848	151771386	BC038201	uc001eze.2	chr1	+	151763317	151766877
chr1	151959666	151968385	chr1	152017022	152025607	AK125884	uc001ezm.1	chr1	+	151967006	152015250
chr1	153625672	153630202	chr1	153631060	153635484	SNAPIN	uc001fcq.2	chr1	+	153631144	153634325
chr1	153630568	153633669	chr1	153640327	153644659	ILF2	uc001fcr.2	chr1	-	153634514	153643479
chr1	154178512	154181668	chr1	154191350	154195389	C1orf43	uc001fei.2	chr1	-	154179182	154193273
chr1	154917414	154921177	chr1	154923410	154928078	PBXIP1	uc001ffr.2	chr1	-	154916560	154928567
chr1	154953647	154958770	chr1	154960458	154968452	FLAD1	uc001fgc.2	chr1	+	154955816	154961487
chr1	155033623	155037849	chr1	155048867	155059334	EFNA3	uc010pew.1	chr1	+	155036212	155060006
chr1	155229969	155235048	chr1	155239331	155244536	CLK2	uc001fjw.2	chr1	-	155232659	155243281
chr1	155277038	155280735	chr1	155290857	155297016	FDPS	uc001fkc.2	chr1	+	155278538	155290457
chr1	155893064	155900339	chr1	155902644	155906758	KIAA0907	uc001fmm.2	chr1	-	155894835	155904188
chr1	156162373	156164858	chr1	156181360	156184067	KIAA0446	uc010phc.1	chr1	+	156163729	156182586
chr1	156251320	156256912	chr1	156259715	156266944	TMEM79	uc010phi.1	chr1	+	156252703	156262235
chr1	160159884	160163469	chr1	160172858	160175819	CASQ1	uc010pja.1	chr1	+	160160284	160171674
chr1	161127988	161130897	chr1	161135069	161138593	USP21	uc010pke.1	chr1	+	161129253	161135515
chr1	166833957	166837285	chr1	166844061	166846812	TADA1	uc009wve.2	chr1	-	166831952	166845654
chr1	169075106	169077398	chr1	169100554	169103661	ATP1B1	uc001gfr.1	chr1	+	169075946	169101960
chr1	170499568	170505100	chr1	170506346	170511134	GORAB	uc009wvw.2	chr1	+	170501262	170508708
chr1	173835150	173839113	chr1	173839273	173845996	ZBTB37	uc001gjq.3	chr1	+	173837492	173842776
chr1	201343335	201347822	chr1	201366549	201370627	LAD1	uc001gwm.2	chr1	-	201349967	201368669
chr1	201448314	201450491	chr1	201458180	201461323	CSRP1	uc001gwr.1	chr1	-	201452659	201462029
chr1	202302919	202307581	chr1	202309717	202311457	UBE2T	uc001gxx.3	chr1	-	202300785	202311094
chr1	203830005	203836765	chr1	203837268	203841247	SNRPE	uc010pqn.1	chr1	+	203830726	203840278
chr1	204042230	204044267	chr1	204084768	204088131	SOX13	uc001hal.2	chr1	+	204042245	204088972
chr1	205585790	205590596	chr1	205598768	205601780	ELK4	uc001hcz.2	chr1	-	205588397	205602000
chr1	226269914	226271817	chr1	226276025	226279339	BC032899	uc001hpx.2	chr1	+	226271655	226277990
chr1	228269348	228271956	chr1	228285980	228289324	ARF1	uc001hrr.2	chr1	+	228270360	228286912
chr1	232940345	232944539	chr1	232946961	232950227	KIAA1383	uc001hvh.2	chr1	+	232940637	232946092
chr1	245009226	245013065	chr1	245020725	245022546	HNRNPU	uc001iaw.1	chr1	-	245013601	245021576
chr10	1082418	1085956	chr10	1093944	1097062	IDI1	uc001iga.2	chr10	-	1085965	1095061
chr10	5918530	5921893	chr10	5930129	5932751	ANKRD16	uc009xif.2	chr10	-	5920050	5931860
chr10	6244951	6247440	chr10	6279322	6281493	PFKFB3	uc001ije.2	chr10	+	6244839	6277505
chr10	25304337	25307239	chr10	25311280	25314778	THNSL1	uc001isi.3	chr10	+	25305507	25315591
chr10	28813662	28817679	chr10	28818632	28822073	BC043365	uc001iuc.2	chr10	-	28811613	28821460
chr10	70090654	70094281	chr10	70103397	70106591	HNRNPH3	uc001jnw.3	chr10	+	70091767	70102952
chr10	71076300	71078942	chr10	71147773	71150296	HK1	uc009xqd.2	chr10	+	71078602	71149194
chr10	72625832	72629218	chr10	72637519	72639996	KIAA1252	uc009xqk.2	chr10	+	72628942	72640930
chr10	75559152	75563399	chr10	75563470	75567357	NDST2	uc001jvl.1	chr10	-	75561673	75564210
chr10	76969325	76972312	chr10	76992354	76995460	VDAC2	uc001jwz.2	chr10	+	76970562	76991204
chr10	81104834	81114035	chr10	81114089	81118893	PPIF	uc001kai.2	chr10	+	81107219	81115084
chr10	102132645	102134773	chr10	102149898	102152386	C10orf75	uc001kqz.3	chr10	+	102133332	102148110
chr10	102737085	102740524	chr10	102743972	102748264	MRPL43	uc001kry.1	chr10	-	102737578	102747272
chr10	102789049	102792531	chr10	102800280	102803641	SFXN3	uc001ksp.2	chr10	+	102790995	102800997
chr10	103891150	103896034	chr10	103908342	103913676	PPRC1	uc001kum.2	chr10	+	103892786	103910088
chr10	104160006	104163748	chr10	104179001	104182146	PSD	uc001kvg.1	chr10	-	104162375	104178901
chr10	104179944	104182140	chr10	104190945	104194202	CUEDC2	uc001kvn.2	chr10	-	104183001	104192423
chr10	106013294	106019077	chr10	106019849	106024966	GSTO1	uc001kya.2	chr10	+	106014677	106027209
chr10	120924990	120931124	chr10	120935167	120939757	PRDX3	uc001lec.2	chr10	-	120927215	120938345
chr10	131907538	131910446	chr10	131917703	131921495	CR592586	uc001lkl.2	chr10	+	131910185	131919004
chr10	135073403	135076471	chr10	135090657	135094785	ADAM8	uc010quz.1	chr10	-	135075920	135090372
chr10	135169817	135173962	chr10	135185144	135188879	ECHS1	uc001lmu.2	chr10	-	135175987	135186908
chr11	393845	398704	chr11	405753	408819	PKP3	uc001lpc.2	chr11	+	394216	404907
chr11	566694	572939	chr11	573241	577828	LOC143666	uc010qwb.1	chr11	-	573808	575885
chr11	695193	700041	chr11	703456	707537	TMEM80	uc001lqr.2	chr11	+	695615	704127
chr11	763890	767156	chr11	773758	777701	PDDC1	uc001lrc.2	chr11	-	767223	777487
chr11	1967030	1970269	chr11	1975656	1978046	MRPL23	uc001lux.2	chr11	+	1968501	1977837
chr11	2156767	2160392	chr11	2166496	2169724	PEG8/IGF2AS	uc001lvk.1	chr11	+	2161736	2169894
chr11	10827710	10831599	chr11	10877127	10882926	DKFZp564M0764	uc001mjg.1	chr11	-	10833620	10877804
chr11	33719802	33724252	chr11	33756362	33758973	CD59	uc001mut.3	chr11	-	33724557	33758025
chr11	34070943	34074517	chr11	34126345	34130034	CAPRIN1	uc001mvh.1	chr11	+	34073229	34124157
chr11	45928758	45932080	chr11	45935819	45940848	PEX16	uc001nbu.2	chr11	-	45931220	45939674
chr11	46366615	46371334	chr11	46386740	46389085	DGKZ	uc001nci.1	chr11	+	46366986	46390725
chr11	47200034	47203035	chr11	47206098	47208955	PACSIN3	uc001ndw.2	chr11	-	47199084	47207427
chr11	47235087	47240051	chr11	47254833	47258743	DDB2	uc001neb.2	chr11	+	47236492	47260769
chr11	47268184	47272453	chr11	47274224	47282933	NR1H3	uc009yll.1	chr11	+	47269850	47283569
chr11	47589812	47593949	chr11	47596590	47600523	KBTBD4	uc001nfw.1	chr11	-	47593749	47600341
chr11	59520892	59524346	chr11	59568386	59571236	STX3	uc001nog.2	chr11	+	59522888	59570176
chr11	60895582	60899547	chr11	60925717	60932326	VPS37C	uc001nqv.1	chr11	-	60897727	60928916
chr11	61071179	61075065	chr11	61100055	61101747	DDB1	uc010rle.1	chr11	-	61069728	61100666
chr11	61115306	61117045	chr11	61127798	61129604	CYBASC3	uc010rlh.1	chr11	-	61116221	61129755
chr11	61184384	61192687	chr11	61195189	61199835	FLJ12529	uc009ynp.2	chr11	-	61188419	61197464
chr11	62340568	62349012	chr11	62352905	62360896	TUT1	uc001nto.2	chr11	-	62342516	62359109
chr11	62367259	62369985	chr11	62378644	62382256	EML3	uc001ntr.1	chr11	-	62369690	62379068
chr11	62378927	62384222	chr11	62386723	62391408	B3GAT3	uc001ntw.2	chr11	-	62382768	62389448
chr11	62389668	62391577	chr11	62412528	62415221	GANAB	uc001nua.2	chr11	-	62392299	62414104
chr11	62477497	62481384	chr11	62491363	62493425	HNRNPUL2	uc001nuw.2	chr11	-	62482221	62494821
chr11	62527829	62531523	chr11	62534556	62539173	POLR2G	uc001nva.2	chr11	+	62529010	62534185
chr11	62538047	62540716	chr11	62547646	62549792	TAF6L	uc009yof.2	chr11	+	62538874	62549936
chr11	62571133	62575732	chr11	62597346	62601541	STX5	uc001nvh.2	chr11	-	62574369	62599560
chr11	63752288	63756029	chr11	63763681	63768140	OTUB1	uc001nyf.1	chr11	+	63753324	63765892
chr11	63951087	63956474	chr11	63963164	63966421	STIP1	uc001nyj.2	chr11	+	63953586	63963346
chr11	63970788	63973904	chr11	63990658	63992765	FERMT3	uc001nyl.2	chr11	+	63974151	63991363
chr11	64011688	64024499	chr11	64027347	64039197	PLCB3	uc001nzb.2	chr11	+	64019121	64035042
chr11	64031239	64041732	chr11	64049023	64057727	BAD	uc001nzd.2	chr11	-	64037300	64052176
chr11	64062834	64066134	chr11	64069885	64072841	C11orf20	uc009ypm.2	chr11	+	64066817	64072238
chr11	64861073	64867849	chr11	64875188	64881528	C11orf2	uc001ocr.1	chr11	+	64863682	64879180
chr11	65146033	65162128	chr11	65179430	65199916	FRMD8	uc001odu.3	chr11	+	65154040	65180993
chr11	65361929	65364409	chr11	65381395	65384627	MAP3K11	uc001oew.2	chr11	-	65365226	65381720
chr11	65391676	65393420	chr11	65405540	65408690	PCNXL3	uc001oez.2	chr11	+	65394323	65404910
chr11	65405736	65408778	chr11	65414122	65418206	SIPA1	uc001ofb.2	chr11	+	65405577	65418391
chr11	65816864	65822672	chr11	65833174	65840391	SF3B2	uc001ogy.1	chr11	+	65819815	65836382
chr11	66382473	66386688	chr11	66406077	66411977	RBM4	uc009yrj.2	chr11	+	66384052	66412102
chr11	66382776	66385059	chr11	66394096	66397441	RBM14	uc009yrh.2	chr11	+	66384052	66397390
chr11	66787096	66801485	chr11	66820152	66831155	SYT12	uc009yrl.2	chr11	+	66790189	66818329
chr11	66819914	66825159	chr11	66835222	66840862	RHOD	uc001ojv.2	chr11	+	66824288	66839487
chr11	67018499	67024653	chr11	67025135	67030821	KIAA1004	uc001oka.2	chr11	+	67019808	67025542
chr11	67178492	67181610	chr11	67185315	67188870	KIAA1394	uc010rpq.1	chr11	+	67183148	67186714
chr11	67372349	67374812	chr11	67380608	67383667	NDUFV1	uc001omj.2	chr11	+	67374322	67380012
chr11	67776176	67779261	chr11	67787430	67789772	ALDH3B1	uc001omy.1	chr11	+	67777789	67785348
chr11	68027790	68030668	chr11	68035963	68038804	C11orf24	uc001ons.2	chr11	-	68028962	68035719
chr11	68448603	68451982	chr11	68453293	68456987	GAL	uc001oob.2	chr11	+	68451982	68458642
chr11	71810809	71817664	chr11	71819622	71825902	DKFZp564M082	uc009ytc.1	chr11	-	71817423	71823822
chr11	74204103	74208105	chr11	74210704	74213693	MGC12965	uc001ove.2	chr11	+	74204484	74209577
chr11	116651433	116656184	chr11	116656814	116659714	ZNF259	uc001ppp.2	chr11	-	116649276	116658739
chr11	118122657	118125084	chr11	118130929	118133890	MPZL2	uc001psn.2	chr11	-	118124134	118135009
chr11	118868229	118873144	chr11	118883225	118887165	CCDC84	uc001pul.2	chr11	+	118868851	118886454
chr11	118917633	118920837	chr11	118923541	118927271	HYOU1	uc010ryw.1	chr11	-	118919187	118927916
chr11	119225223	119229656	chr11	119232073	119234897	USP2	uc001pwl.3	chr11	-	119225925	119234892
chr11	129722273	129725950	chr11	129730285	129737640	TMEM45B	uc001qff.1	chr11	+	129720067	129729898
chr12	740052	743299	chr12	750259	753818	LOC100049716	uc001qim.1	chr12	+	740056	755044
chr12	6417741	6424505	chr12	6426287	6432294	PLEKHG6	uc001qns.2	chr12	+	6419903	6428137
chr12	6601089	6604779	chr12	6635538	6639154	NCAPD2	uc009zen.1	chr12	+	6603297	6637494
chr12	6769929	6773382	chr12	6797415	6800455	ZNF384	uc001qpz.2	chr12	-	6775643	6797825
chr12	6851617	6855784	chr12	6856072	6862477	MLF2	uc010sfi.1	chr12	-	6857159	6862082
chr12	6958374	6964112	chr12	6972301	6980113	USP5	uc001qrh.3	chr12	+	6961284	6975793
chr12	9800471	9803310	chr12	9812554	9815870	CLR	uc001qwe.1	chr12	+	9800642	9811008
chr12	49523686	49526705	chr12	49580771	49582882	TUBA1B	uc001rto.2	chr12	-	49521567	49580616
chr12	49952910	49957390	chr12	49959243	49963202	MCRS1	uc001run.1	chr12	-	49956776	49961911
chr12	50218679	50224388	chr12	50235211	50238255	BCDIN3D	uc010smm.1	chr12	+	50222325	50234936
chr12	50494073	50500215	chr12	50500584	50507453	GPD1	uc001rvz.2	chr12	+	50497800	50505093
chr12	52462917	52464426	chr12	52469455	52471569	C12orf44	uc001rzu.3	chr12	+	52463757	52471278
chr12	52637389	52641476	chr12	52699835	52703781	KRT86	uc010snq.1	chr12	+	52643083	52702945
chr12	52700190	52706142	chr12	52711920	52714630	KRT83	uc001saf.2	chr12	-	52708084	52715182
chr12	53271591	53314919	chr12	53332879	53378761	KRT8	uc009zml.1	chr12	-	53290970	53343608
chr12	53432714	53434874	chr12	53437662	53442335	CR590020	uc001sbj.1	chr12	-	53432747	53440841
chr12	53550966	53555614	chr12	53573284	53576302	CSAD	uc010snx.1	chr12	-	53551447	53574430
chr12	53720629	53723802	chr12	53725952	53728974	SP7	uc001sct.2	chr12	-	53720361	53729537
chr12	56349978	56352007	chr12	56359232	56361194	SILV	uc001sip.2	chr12	-	56347889	56359846
chr12	56390205	56393316	chr12	56396293	56400224	SUOX	uc009zoh.2	chr12	+	56391042	56396837
chr12	56471890	56479186	chr12	56494783	56500832	ERBB3	uc001sjh.2	chr12	+	56473891	56497127
chr12	56496520	56503528	chr12	56504398	56513432	PA2G4	uc001sjm.2	chr12	+	56498102	56507693
chr12	56550178	56554723	chr12	56575233	56584234	SMARCC2	uc001skd.2	chr12	-	56555636	56583351
chr12	56700000	56706445	chr12	56706474	56711392	CNPY2	uc001sku.1	chr12	-	56704216	56710120
chr12	56708819	56712157	chr12	56725244	56728275	PAN2	uc001skx.2	chr12	-	56710717	56727529
chr12	57026720	57034338	chr12	57034760	57041762	ATP5B	uc001slr.2	chr12	-	57031960	57039852
chr12	57881720	57884964	chr12	57912644	57915605	MARS	uc001sof.1	chr12	+	57881076	57911334
chr12	57913866	57917472	chr12	57925305	57930275	MBD6	uc001soj.1	chr12	+	57916658	57923931
chr12	57984079	57988035	chr12	57996790	58002327	PIP4K2C	uc001sou.2	chr12	+	57984941	57997210
chr12	82741804	82746481	chr12	82748913	82753039	CCDC59	uc001szp.3	chr12	-	82746089	82752199
chr12	89910732	89913277	chr12	89916508	89919451	GALNT4	uc001tbd.2	chr12	-	89913191	89918535
chr12	98909075	98911583	chr12	98924986	98927396	TMPO	uc001tfh.1	chr12	+	98909408	98928321
chr12	110886653	110890251	chr12	110905177	110907823	GPN3	uc001tqr.2	chr12	-	110890291	110906064
chr12	112450081	112452686	chr12	112457201	112459419	ERP29	uc001ttk.1	chr12	+	112451151	112461024
chr12	118497389	118502867	chr12	118535601	118543420	VSIG10	uc001tws.2	chr12	-	118501399	118541810
chr12	120638874	120644262	chr12	120646343	120651580	CR607463	uc001txs.1	chr12	+	120639173	120650941
chr12	120897756	120902250	chr12	120904845	120908904	SFRS9	uc001tyi.2	chr12	-	120899471	120907558
chr12	120906184	120910535	chr12	120931936	120935336	DYNLL1	uc001tyj.2	chr12	+	120907659	120936297
chr12	121713150	121715733	chr12	121730584	121733612	CAMKK2	uc001uad.1	chr12	-	121711858	121734505
chr12	122686824	122690983	chr12	122708300	122710735	DIABLO	uc010taa.1	chr12	-	122692209	122712068
chr12	122982366	122987040	chr12	123008583	123012938	RSRC2	uc001uco.2	chr12	-	122989274	123007379
chr13	26785143	26787931	chr13	26792094	26795102	RNF6	uc001uqo.2	chr13	-	26786905	26795840
chr13	28006002	28008462	chr13	28021573	28025446	MTIF3	uc001uri.2	chr13	-	28009782	28024325
chr13	37573073	37575364	chr13	37580996	37587392	EXOSC8	uc001uvz.2	chr13	+	37574677	37582972
chr13	38923101	38926299	chr13	38929717	38933537	UFM1	uc010abz.2	chr13	+	38923941	38934332
chr13	39611941	39615371	chr13	39620299	39623049	NHLRC3	uc001uxb.1	chr13	+	39612454	39618339
chr13	111296887	111299817	chr13	111365376	111368411	OK/SW-cl.10	uc010tjm.1	chr13	-	111296302	111365950
chr14	21458288	21461772	chr14	21465005	21467526	METT11D1	uc001vym.2	chr14	+	21457964	21465187
chr14	21557255	21561939	chr14	21564543	21567666	ZNF219	uc001vzr.2	chr14	-	21558204	21566808
chr14	21840958	21844995	chr14	21849815	21852784	SUPT16H	uc001wap.2	chr14	-	21840233	21852425
chr14	21922671	21927692	chr14	21941288	21947915	RAB2B	uc010tls.1	chr14	-	21927179	21944832
chr14	21963389	21966632	chr14	21968261	21971736	METTL3	uc001wbb.2	chr14	-	21966282	21971972
chr14	23065790	23069194	chr14	23080484	23084261	ABHD4	uc001wgm.2	chr14	+	23067146	23081257
chr14	23525730	23528221	chr14	23539288	23542231	KIAA0670	uc001wio.3	chr14	-	23527775	23538826
chr14	23546264	23549834	chr14	23561664	23566551	ACIN1	uc010tnj.1	chr14	-	23548755	23564823
chr14	23589810	23592553	chr14	23653947	23657701	SLC7A8	uc001wiz.2	chr14	-	23594505	23652849
chr14	24549834	24551720	chr14	24562668	24565050	NRL	uc001wlp.2	chr14	-	24549316	24564339
chr14	24653968	24669489	chr14	24671998	24687373	TM9SF1	uc010tob.1	chr14	-	24657924	24683357
chr14	24681196	24688669	chr14	24698217	24706755	NEDD8	uc001wnn.2	chr14	-	24686056	24701576
chr14	24833574	24838802	chr14	24840854	24849827	NFATC4	uc010tok.1	chr14	+	24836144	24848808
chr14	31027330	31030289	chr14	31087785	31091874	G2E3	uc001wqk.2	chr14	+	31028328	31089046
chr14	45553090	45555108	chr14	45581423	45584385	PRPF39	uc001wvz.3	chr14	+	45553301	45584802
chr14	53165784	53171669	chr14	53171997	53175074	PSMC6	uc010tqv.1	chr14	+	53173895	53177052
chr14	55492597	55496738	chr14	55514437	55519496	SOCS4	uc001xbo.2	chr14	+	55493843	55516204
chr14	58750331	58753804	chr14	58763239	58766631	BC112974	uc010apd.1	chr14	-	58752308	58764850
chr14	64999625	65004291	chr14	65004343	65008896	HSPA2	uc001xhj.2	chr14	+	65002622	65009952
chr14	68139713	68143466	chr14	68155599	68160519	RDH11	uc001xjv.3	chr14	-	68143520	68162510
chr14	75347708	75351086	chr14	75351840	75356527	DLST	uc010tuu.1	chr14	+	75348593	75358456
chr14	75517092	75519957	chr14	75529593	75532986	ACYP1	uc001xrf.2	chr14	-	75519929	75530736
chr14	75986748	75991344	chr14	76006886	76012016	BATF	uc001xrr.2	chr14	+	75988783	76013327
chr14	76044161	76047825	chr14	76112023	76114622	FLVCR2	uc001xrs.2	chr14	+	76044939	76114512
chr14	81660063	81662395	chr14	81684365	81687532	GTF2A1	uc001xvh.1	chr14	-	81663570	81687721
chr14	100752976	100755783	chr14	100764007	100767115	SLC25A29	uc010avv.2	chr14	-	100757454	100762071
chr14	103592467	103594879	chr14	103602454	103605483	TNFAIP2	uc001ymm.1	chr14	+	103592663	103603776
chr14	105153035	105158169	chr14	105187509	105192673	INF2	uc001ypb.2	chr14	+	105155942	105185947
chr14	105193037	105195488	chr14	105213792	105219074	ADSSL1	uc001ype.2	chr14	+	105196227	105213645
chr14	105452146	105455332	chr14	105458697	105461323	C14orf79	uc001ypy.1	chr14	+	105452615	105461855
chr14	105922227	105924979	chr14	105931853	105934905	MTA1	uc001yrb.2	chr14	+	105924606	105937048
chr15	34652373	34655399	chr15	34657751	34661030	LPCAT4	uc010bav.1	chr15	-	34656146	34659395
chr15	44066443	44071524	chr15	44087650	44094479	ELL3	uc001zsx.1	chr15	-	44064814	44091335
chr15	49911839	49916502	chr15	49916824	49923464	DTWD1	uc001zxp.3	chr15	+	49913225	49922154
chr15	52541507	52559220	chr15	52576974	52590062	MYO5C	uc010ugc.1	chr15	-	52553098	52587970
chr15	69071991	69075450	chr15	69110758	69114351	ANP32A	uc002arl.2	chr15	-	69070876	69113261
chr15	72489778	72494744	chr15	72519662	72525368	PKM2	uc010biu.1	chr15	-	72492814	72521017
chr15	75134077	75137703	chr15	75161727	75167018	SCAMP2	uc002azb.1	chr15	-	75137196	75165670
chr15	75191697	75194930	chr15	75196594	75199776	C15orf17	uc010bkh.2	chr15	-	75192328	75198910
chr15	75495501	75497804	chr15	75501600	75503861	C15orf39	uc002azq.3	chr15	+	75494220	75504508
chr15	75657681	75662590	chr15	75741499	75750037	SIN3A	uc002bai.2	chr15	-	75661721	75743926
chr15	75929289	75933639	chr15	75942218	75946647	IMP3	uc002bat.2	chr15	-	75931428	75941047
chr15	80187007	80192990	chr15	80213051	80218712	ST20	uc002bfa.3	chr15	-	80191182	80216077
chr15	89164193	89167775	chr15	89168995	89175623	AEN	uc010bnl.2	chr15	+	89164526	89170572
chr15	89899283	89903376	chr15	89941803	89944463	LOC254559	uc002bnt.2	chr15	+	89904809	89941718
chr15	90629304	90632609	chr15	90644129	90646284	IDH2	uc010uqb.1	chr15	-	90627213	90643927
chr15	91445039	91447626	chr15	91461991	91463807	MAN2A2	uc010bnz.2	chr15	+	91446565	91463095
chr15	91485929	91488589	chr15	91498395	91501583	UNC45A	uc010uqr.1	chr15	+	91490466	91497322
chr15	91537414	91541562	chr15	91563616	91567092	VPS33B	uc002bqp.1	chr15	-	91541773	91565833
chr15	93158527	93161664	chr15	93196023	93199197	FAM174B	uc010boe.2	chr15	-	93160680	93199031
chr15	100880654	100883469	chr15	100888267	100891428	FLJ42289	uc010boy.2	chr15	-	100884661	100890438
chr15	102184137	102190370	chr15	102191936	102194956	TM2D3	uc010ush.1	chr15	-	102186607	102192594
chr16	101923	107969	chr16	120659	123487	RHBDF1	uc002cfl.3	chr16	-	108058	122629
chr16	413398	415415	chr16	418959	422072	MRPL28	uc010bqu.1	chr16	-	417395	420225
chr16	419710	421671	chr16	431709	433763	TMEM8A	uc002cgu.3	chr16	-	420776	431950
chr16	613368	615428	chr16	635333	638149	PIGQ	uc010bqw.2	chr16	+	617031	634108
chr16	697457	701575	chr16	703858	707836	WDR90	uc002cig.1	chr16	+	699362	706537
chr16	738239	743024	chr16	752414	756281	FBXL16	uc002cjc.2	chr16	-	742506	755808
chr16	1347629	1355861	chr16	1356814	1361646	NR_027453	uc010uuy.1	chr16	-	1355547	1359414
chr16	1401177	1403966	chr16	1414204	1416034	GNPTG	uc002clm.2	chr16	+	1401931	1413351
chr16	1468879	1474292	chr16	1474505	1482720	C16orf91	uc010uvd.1	chr16	-	1469945	1479345
chr16	1480785	1484210	chr16	1486142	1488911	CCDC154	uc010brp.2	chr16	-	1484389	1485303
chr16	1660409	1663888	chr16	1727469	1731457	CRAMP1L	uc010uvh.1	chr16	+	1664640	1727907
chr16	2087964	2091281	chr16	2095678	2098796	NTHL1	uc002col.1	chr16	-	2089815	2097867
chr16	2205009	2207295	chr16	2224077	2227202	TRAF7	uc002cow.2	chr16	+	2205798	2228129
chr16	2299769	2303496	chr16	2317024	2320954	RNPS1	uc002cpt.2	chr16	-	2303120	2317604
chr16	2387920	2392547	chr16	2477049	2480012	ABCA17	uc002cqc.1	chr16	+	2390922	2476700
chr16	3092792	3095581	chr16	3107328	3109916	MMP25	uc002cth.2	chr16	+	3096681	3110722
chr16	3154698	3158831	chr16	3159600	3164908	MGC3771	uc010btd.2	chr16	-	3160460	3162490
chr16	3160093	3169032	chr16	3170543	3176120	ZNF205	uc002cub.2	chr16	+	3162562	3170516
chr16	3183386	3186867	chr16	3188733	3193524	ZNF213	uc010uws.1	chr16	+	3185056	3192804
chr16	3453108	3455508	chr16	3456616	3461204	ZNF174	uc002cva.2	chr16	+	3451189	3454994
chr16	3478937	3484557	chr16	3491241	3494602	ZNF597	uc002cvd.2	chr16	-	3486110	3493490
chr16	4294745	4298878	chr16	4299574	4305193	AK094828	uc002cwa.1	chr16	-	4295825	4303790
chr16	4302106	4305748	chr16	4320597	4323382	TFAP4	uc010uxg.1	chr16	-	4307187	4323001
chr16	4651562	4657463	chr16	4662549	4666532	FAM100A	uc002cwx.2	chr16	-	4658883	4664927
chr16	4673636	4676710	chr16	4740318	4745603	MGRN1	uc002cxa.2	chr16	+	4674825	4740974
chr16	4742167	4747005	chr16	4782039	4786694	ANKS3	uc002cxj.1	chr16	-	4746512	4784163
chr16	4844471	4848924	chr16	4850268	4853450	ROGDI	uc002cxu.2	chr16	-	4846969	4852163
chr16	8891341	8893289	chr16	8898689	8901821	PMM2	uc010uye.1	chr16	+	8891669	8900891
chr16	14456848	14460268	chr16	14465822	14469569	CR593775	uc002dck.1	chr16	-	14456965	14464123
chr16	15721291	15727812	chr16	15733173	15738397	LKAP	uc010uzx.1	chr16	-	15728613	15737009
chr16	27323366	27327705	chr16	27372112	27378888	IL4R	uc002don.2	chr16	+	27325250	27376098
chr16	28873436	28875633	chr16	28885110	28889585	SH2B1	uc010vdc.1	chr16	+	28874879	28885533
chr16	29799443	29805463	chr16	29814003	29818464	KIF22	uc002dts.3	chr16	+	29802057	29816706
chr16	30107576	30116026	chr16	30121791	30127381	GDPD3	uc002dwp.2	chr16	-	30116131	30124878
chr16	30122273	30127466	chr16	30131876	30135592	MAPK3	uc002dwr.2	chr16	-	30125426	30134289
chr16	30365988	30368324	chr16	30379903	30383181	TBC1D10B	uc002dxu.2	chr16	-	30368421	30381522
chr16	30378594	30385630	chr16	30387521	30391288	MYLPF	uc002dxv.1	chr16	+	30386122	30389310
chr16	30416619	30423572	chr16	30426889	30432657	ZNF771	uc002dyd.2	chr16	+	30418734	30429915
chr16	30455018	30459325	chr16	30459448	30466407	SEPHS2	uc002dyh.1	chr16	-	30454952	30457224
chr16	30563145	30566215	chr16	30567475	30571582	ZNF764	uc002dyq.2	chr16	-	30565085	30569584
chr16	30581759	30585417	chr16	30594028	30598264	ZNF785	uc002dyu.2	chr16	+	30583575	30595166
chr16	30669432	30672014	chr16	30677536	30679886	FBRS	uc002dzc.3	chr16	+	30671242	30682130
chr16	30708288	30710897	chr16	30749670	30754768	SRCAP	uc002dze.1	chr16	+	30710461	30752028
chr16	30764269	30767197	chr16	30774260	30776073	C16orf93	uc002dzm.2	chr16	-	30768752	30773400
chr16	30883282	30888471	chr16	30902675	30909398	BC073928	uc002dzu.2	chr16	+	30887232	30906537
chr16	30895575	30900547	chr16	30903138	30906914	BCL7C	uc002dzv.2	chr16	-	30899116	30905399
chr16	31124088	31126744	chr16	31144903	31147284	MYST1	uc002eay.2	chr16	+	31128984	31142713
chr16	31469645	31472545	chr16	31475087	31478402	ARMC5	uc010vfn.1	chr16	+	31469593	31478487
chr16	56964578	56968744	chr16	56969773	56973944	HERPUD1	uc010vhj.1	chr16	+	56965747	56971325
chr16	57479693	57483345	chr16	57488928	57493496	COQ9	uc010vhn.1	chr16	+	57481401	57491052
chr16	57495316	57500809	chr16	57503239	57507964	POLR2C	uc010vhq.1	chr16	+	57496550	57503814
chr16	58548462	58552444	chr16	58662683	58665589	CNOT1	uc002env.2	chr16	-	58553855	58663750
chr16	67239893	67242006	chr16	67259394	67262303	LRRC29	uc002ese.2	chr16	-	67241042	67260721
chr16	67875691	67879787	chr16	67904909	67908063	NUTF2	uc010vkf.1	chr16	+	67880818	67902788
chr16	67983543	67986801	chr16	67999753	68001912	KCC1	uc010cew.1	chr16	-	67986086	68003095
chr16	68277322	68283402	chr16	68284467	68292909	PLA2G15	uc002evr.2	chr16	+	68279246	68294959
chr16	69347091	69351074	chr16	69353318	69358756	VPS4A	uc002eww.2	chr16	+	69345286	69358945
chr16	71658876	71663269	chr16	71663368	71669441	MARVELD3	uc002fas.1	chr16	+	71660069	71663577
chr16	71879026	71881212	chr16	71914841	71917763	ATXN1L	uc010vmi.1	chr16	+	71879898	71919174
chr16	75030200	75036948	chr16	75141780	75150916	ZNRF1	uc002fdk.2	chr16	+	75032914	75141917
chr16	75143360	75146497	chr16	75149235	75152295	LDHD	uc002fdn.2	chr16	-	75145758	75150665
chr16	75680559	75683341	chr16	75688616	75691288	TERF2IP	uc002fet.1	chr16	+	75681683	75691328
chr16	84176709	84179375	chr16	84207687	84211553	LRRC50	uc002fhl.3	chr16	+	84178864	84211523
chr16	84851597	84856148	chr16	84867847	84871967	CRISPLD2	uc002fik.3	chr16	+	84853586	84873624
chr16	88518586	88521273	chr16	88600453	88602436	ZFPM1	uc002fkv.2	chr16	+	88520013	88601573
chr16	88728117	88731462	chr16	88748999	88753364	MGC23284	uc002fli.3	chr16	+	88729780	88753592
chr16	88876343	88882292	chr16	88921969	88925842	GALNS	uc002fly.3	chr16	-	88880142	88923374
chr16	88929483	88932260	chr16	88933665	88937812	LOC390748	uc010vpe.1	chr16	-	88929745	88933014
chr16	89298331	89303039	chr16	89304297	89307887	AK023048	uc010vph.1	chr16	+	89299633	89302402
chr16	90024070	90032273	chr16	90036279	90041514	DEF8	uc002fpq.1	chr16	+	90030247	90034467
chr16	90037800	90040665	chr16	90050253	90053350	AFG3L1	uc002fps.1	chr16	+	90038987	90051109
chr16	90084681	90087330	chr16	90112089	90114152	GAS8	uc010vps.1	chr16	+	90086068	90111379
chr17	1552075	1554804	chr17	1586015	1589280	PRPF8	uc002fte.2	chr17	-	1553923	1588176
chr17	3569097	3572945	chr17	3575093	3580007	TMEM93	uc002fwf.1	chr17	+	3572089	3572962
chr17	4045488	4049994	chr17	4060694	4066273	CYB5D2	uc002fxm.3	chr17	+	4046461	4060989
chr17	4889243	4892918	chr17	4899434	4903796	INCA1	uc002gaj.2	chr17	-	4891425	4900424
chr17	6938489	6941835	chr17	6943912	6946540	SLC16A13	uc002geh.2	chr17	+	6939393	6943439
chr17	7140867	7148040	chr17	7152003	7157524	DULLARD	uc002gfd.2	chr17	-	7146905	7154995
chr17	7217255	7220527	chr17	7230463	7233131	NEURL4	uc002gga.1	chr17	-	7218950	7232638
chr17	7224860	7229334	chr17	7231250	7233875	KIAA1787	uc002ggc.1	chr17	-	7224878	7230229
chr17	7357604	7363639	chr17	7379903	7385646	ZBTB4	uc002ghc.3	chr17	-	7362685	7382944
chr17	14204386	14206728	chr17	14211294	14213809	MGC12916	uc010vvv.1	chr17	+	14207056	14209061
chr17	18165884	18167982	chr17	18169657	18174696	SMCR7	uc002gsu.2	chr17	+	18163847	18169093
chr17	25621084	25623111	chr17	25636430	25640317	WSB1	uc010vzz.1	chr17	+	25621105	25636298
chr17	26669923	26676428	chr17	26680675	26686167	POLDIP2	uc002haz.2	chr17	-	26673659	26684603
chr17	26850071	26856333	chr17	26856444	26863095	FOXN1	uc002hbj.2	chr17	+	26850958	26865173
chr17	26877379	26881105	chr17	26898261	26900609	PIGS	uc002hbn.2	chr17	-	26880405	26898496
chr17	26969681	26973787	chr17	26986306	26990996	SDF2	uc002hbw.2	chr17	-	26975607	26988933
chr17	27030082	27032942	chr17	27036032	27039583	PROCA1	uc002hcb.3	chr17	-	27030533	27038104
chr17	27917805	27920604	chr17	27942260	27945074	ANKRD13B	uc002hei.2	chr17	+	27920526	27941778
chr17	33306065	33310143	chr17	33312367	33315873	LIG3	uc002hii.2	chr17	+	33307537	33316898
chr17	33568388	33571489	chr17	33584149	33586111	SLFN5	uc002hje.2	chr17	+	33570085	33586838
chr17	34947862	34950113	chr17	34957397	34959790	DHRS11	uc002hnd.2	chr17	+	34948225	34957231
chr17	36885556	36888195	chr17	36904683	36907722	PCGF2	uc002hqo.1	chr17	-	36890149	36904437
chr17	38246920	38251893	chr17	38252125	38259053	NR1D1	uc010cwr.1	chr17	-	38250164	38253032
chr17	38466861	38481016	chr17	38492005	38512592	RARA	uc002huk.1	chr17	+	38465445	38513894
chr17	40819677	40822810	chr17	40824073	40828701	DKFZp434G1310	uc010cyl.1	chr17	-	40819932	40824410
chr17	41442894	41449812	chr17	41462364	41468712	LOC100130581	uc010wib.1	chr17	-	41447212	41466266
chr17	42425470	42429089	chr17	42431618	42433529	GRN	uc002igr.1	chr17	+	42427809	42430411
chr17	45897439	45900513	chr17	45906761	45910525	MRPL10	uc010wky.1	chr17	-	45900638	45908896
chr17	46680888	46683788	chr17	46685125	46689253	HOXB7	uc002inv.2	chr17	-	46684602	46688383
chr17	48580578	48584825	chr17	48608624	48611705	MYCBPAP	uc010wmr.1	chr17	+	48585744	48608861
chr17	48612788	48614421	chr17	48620760	48624160	EPN3	uc010wmu.1	chr17	+	48613781	48621110
chr17	55336270	55343080	chr17	55343244	55347721	BX647282	uc002ivb.2	chr17	+	55339475	55345892
chr17	55935493	55943130	chr17	55976524	55980977	CUEDC1	uc002ivd.1	chr17	-	55940336	55980750
chr17	56420445	56423555	chr17	56431073	56434731	SUPT4H1	uc002iwd.1	chr17	-	56422538	56429562
chr17	56428547	56431455	chr17	56493613	56497644	RNF43	uc010wnv.1	chr17	-	56431039	56493120
chr17	56594860	56599023	chr17	56602899	56605835	SEPT4	uc002iwk.1	chr17	-	56597615	56604347
chr17	57182271	57185240	chr17	57230245	57233749	SKA2	uc002ixd.2	chr17	-	57187307	57232800
chr17	57779569	57786688	chr17	57919501	57924993	TMEM49	uc002ixu.3	chr17	+	57784862	57917950
chr17	58026064	58027788	chr17	58039121	58042109	RNFT1	uc002iya.2	chr17	-	58029723	58042117
chr17	60779458	60783426	chr17	60880473	60886065	MARCH10	uc002jah.2	chr17	-	60782308	60885705
chr17	61676056	61681354	chr17	61681908	61686258	TACO1	uc002jbd.2	chr17	+	61678242	61685724
chr17	61817036	61820812	chr17	61850521	61853354	CCDC47	uc002jbs.3	chr17	-	61822610	61851088
chr17	62118997	62123719	chr17	62205941	62208840	ERN1	uc002jdz.2	chr17	-	62120389	62207502
chr17	62219770	62231888	chr17	62327110	62343215	TEX2	uc002jed.2	chr17	-	62224795	62340653
chr17	62500921	62504751	chr17	62528780	62533056	CCDC45	uc002jem.2	chr17	+	62503157	62534060
chr17	72954328	72957798	chr17	72967580	72969735	C17orf28	uc002jmk.2	chr17	-	72955005	72968900
chr17	73125689	73132004	chr17	73148205	73152602	HN1	uc002jmz.1	chr17	-	73131343	73150775
chr17	73312673	73321136	chr17	73398057	73402979	GRB2	uc002jnx.3	chr17	-	73314157	73401790
chr17	73717137	73722416	chr17	73736617	73742105	ITGB4	uc010dgo.2	chr17	+	73717588	73737185
chr17	73765726	73784051	chr17	73799110	73826019	UNK	uc002jpm.2	chr17	+	73780680	73821885
chr17	73972877	73979645	chr17	73989729	73998080	C17orf106	uc010dgs.1	chr17	+	73975300	73997622
chr17	76128364	76132183	chr17	76132460	76137040	TMC8	uc010wtr.1	chr17	+	76130474	76134269
chr17	79505028	79510898	chr17	79511265	79519801	C17orf70	uc002kao.1	chr17	-	79506910	79515524
chr17	79644062	79648539	chr17	79649004	79652606	ARL16	uc002kbe.2	chr17	-	79648233	79650624
chr17	79648243	79652508	chr17	79668782	79673288	HGS	uc002kbg.2	chr17	+	79651019	79669145
chr17	79679185	79681888	chr17	79686583	79690540	SLC25A10	uc002kbi.2	chr17	+	79679370	79688041
chr17	79779187	79783377	chr17	79789742	79794279	FAM195B	uc010wuy.1	chr17	-	79780292	79791167
chr17	79854481	79862070	chr17	79863940	79870773	PCYT2	uc010wva.1	chr17	-	79862091	79868891
chr17	79871449	79879335	chr17	79883008	79886576	MAFG	uc002kcn.2	chr17	-	79876146	79885588
chr18	9100926	9104009	chr18	9134561	9139203	NDUFV2	uc002knu.2	chr18	+	9102674	9134336
chr18	20714334	20716958	chr18	20838574	20840666	CABLES1	uc002kub.2	chr18	+	20714527	20840434
chr18	32826047	32829999	chr18	32830844	32834508	BC2028	uc002kyl.2	chr18	-	32831029	32833671
chr19	280535	287117	chr19	287487	291788	PPAP2C	uc002loh.2	chr19	-	281045	291169
chr19	569841	574061	chr19	577698	581305	BSG	uc002loy.2	chr19	+	571324	583492
chr19	1108222	1113328	chr19	1171915	1177536	SBNO2	uc002lrk.3	chr19	-	1107633	1174282
chr19	5560111	5562381	chr19	5566383	5569073	PLAC2	uc002mcc.3	chr19	-	5558179	5568005
chr19	5678269	5682299	chr19	5684890	5688329	SCDR10	uc002mcj.2	chr19	+	5681034	5685590
chr19	5689206	5693329	chr19	5717855	5721537	LONP1	uc002mcx.2	chr19	-	5691845	5720176
chr19	7682364	7686450	chr19	7691428	7694393	XAB2	uc002mgx.2	chr19	-	7684411	7694439
chr19	8374459	8380720	chr19	8384084	8387398	NDUFA7	uc002mjm.1	chr19	-	8376233	8386280
chr19	10198573	10201703	chr19	10204709	10207767	C19orf66	uc002mmu.3	chr19	+	10196805	10203927
chr19	10425649	10430443	chr19	10441092	10445931	RAVER1	uc002moa.2	chr19	-	10426890	10444314
chr19	10764483	10767241	chr19	10800172	10802876	ILF3	uc002mpo.2	chr19	+	10764936	10803093
chr19	10981969	10984305	chr19	11032964	11037415	CARM1	uc002mpz.2	chr19	+	10982252	11033447
chr19	11661652	11663986	chr19	11668487	11670529	ELOF1	uc002mse.1	chr19	-	11663857	11670051
chr19	13857906	13861880	chr19	13870712	13874220	CCDC130	uc002mxc.1	chr19	+	13858752	13874106
chr19	14198384	14202251	chr19	14226264	14230319	PRKACA	uc002myc.2	chr19	-	14202508	14228559
chr19	14627386	14631162	chr19	14638656	14643204	DNAJB1	uc010xnr.1	chr19	-	14625581	14640049
chr19	15527331	15533388	chr19	15539574	15544724	WIZ	uc002nbc.2	chr19	-	15532318	15541993
chr19	16681937	16686297	chr19	16737273	16740549	MED26	uc002nen.1	chr19	-	16685717	16739015
chr19	17344275	17347554	chr19	17353187	17358283	NR2F6	uc002nfq.2	chr19	-	17342694	17356151
chr19	18495545	18499933	chr19	18502254	18505995	GDF15	uc002niv.2	chr19	+	18496967	18499986
chr19	18541080	18544480	chr19	18547775	18550885	ISYNA1	uc002nja.1	chr19	-	18545624	18548119
chr19	19300955	19303929	chr19	19311821	19315747	RFXANK	uc002nls.2	chr19	+	19303007	19312677
chr19	19727598	19733755	chr19	19737182	19742276	LPAR2	uc002nnb.3	chr19	-	19734467	19739039
chr19	19736821	19739602	chr19	19752760	19755847	GMIP	uc002nnd.2	chr19	-	19740285	19754455
chr19	19757757	19761282	chr19	19771468	19773949	ATP13A1	uc002nng.2	chr19	-	19756011	19772925
chr19	32836453	32839412	chr19	32847514	32850152	ZNF507	uc002ntc.2	chr19	+	32836513	32850707
chr19	34285501	34290329	chr19	34306349	34313391	KCTD15	uc002nuv.2	chr19	+	34287750	34306665
chr19	34894427	34897307	chr19	34915600	34920895	PDCD2L	uc002nvj.2	chr19	+	34895302	34917070
chr19	35445185	35449008	chr19	35451624	35455205	ZNF792	uc002nxh.1	chr19	-	35447257	35454953
chr19	35493514	35501310	chr19	35518850	35525155	GRAMD1A	uc010xse.1	chr19	+	35491245	35517373
chr19	35736394	35744680	chr19	35755068	35763006	LSR	uc002nyl.2	chr19	+	35739558	35758865
chr19	36207276	36210572	chr19	36228470	36233256	MLL4	uc010eei.2	chr19	+	36208920	36229778
chr19	36239004	36244880	chr19	36246037	36252437	LIN37	uc002obm.2	chr19	+	36239511	36245419
chr19	36629522	36633039	chr19	36641103	36643338	CAPNS1	uc002odi.1	chr19	+	36630917	36641251
chr19	38753341	38756979	chr19	38779856	38783291	SPINT2	uc002ohr.1	chr19	+	38755201	38783108
chr19	39895595	39911482	chr19	39918140	39929500	PLEKHG2	uc010xuz.1	chr19	+	39903749	39919054
chr19	40322842	40325581	chr19	40335629	40338275	FBL	uc002omn.2	chr19	-	40325093	40337054
chr19	40948805	40953157	chr19	40967165	40972248	BLVRB	uc002onw.2	chr19	-	40953690	40971725
chr19	41194204	41197621	chr19	41219642	41224343	ADCK4	uc002ooq.1	chr19	-	41197433	41220978
chr19	41768494	41772847	chr19	41814168	41817668	HNRNPUL1	uc002opz.3	chr19	+	41768390	41813810
chr19	44029247	44032724	chr19	44035834	44038439	ZNF575	uc002owq.2	chr19	+	44029648	44040282
chr19	44123808	44127448	chr19	44146037	44149178	CADM4	uc002oxc.1	chr19	-	44126521	44143991
chr19	45577319	45582949	chr19	45592832	45598719	GEMIN7	uc002pap.1	chr19	+	45582517	45594782
chr19	45906862	45911810	chr19	45925290	45929393	ERCC1	uc002pbs.1	chr19	-	45912871	45927177
chr19	46003079	46007125	chr19	46007297	46012332	FLJ40125	uc002pce.2	chr19	+	46001730	46005762
chr19	47106476	47109382	chr19	47115696	47118641	CALM3	uc002pew.2	chr19	+	47104511	47114038
chr19	47279808	47282573	chr19	47288692	47290884	SLC1A5	uc010xyh.1	chr19	-	47278141	47288134
chr19	47758999	47763414	chr19	47775199	47779846	CCDC9	uc010xym.1	chr19	+	47759730	47775208
chr19	48972432	48975791	chr19	48977759	48983034	CYTH2	uc010xzr.1	chr19	+	48972464	48976236
chr19	49105849	49107556	chr19	49116390	49119546	FAM83E	uc002pjn.2	chr19	-	49103856	49116694
chr19	49114283	49125111	chr19	49133968	49142442	SPHK2	uc002pjr.2	chr19	+	49122547	49133661
chr19	49138894	49142533	chr19	49147972	49151418	CA11	uc002pjz.1	chr19	-	49141271	49149451
chr19	49943660	49951190	chr19	49953294	49958397	PIH1D1	uc002pns.2	chr19	-	49949549	49955115
chr19	49954827	49957306	chr19	49975848	49978757	ALDH16A1	uc002pnt.2	chr19	+	49956472	49974304
chr19	49976607	49979283	chr19	49989800	49992726	FLT3LG	uc010yau.1	chr19	+	49977485	49989484
chr19	50081381	50086912	chr19	50092109	50096760	PRRG2	uc002pon.3	chr19	+	50084586	50094265
chr19	50139974	50149026	chr19	50163246	50170658	SCAF1	uc002poq.2	chr19	+	50145381	50161905
chr19	50166476	50171163	chr19	50176788	50183131	BCL2L12	uc002ppa.2	chr19	+	50168398	50177172
chr19	50379992	50382271	chr19	50392607	50396879	TBC1D17	uc002pqo.2	chr19	+	50380828	50392000
chr19	52190894	52195302	chr19	52204311	52207235	UNQ2487	uc002pxk.3	chr19	+	52196592	52208442
chr19	54604978	54608344	chr19	54615926	54621876	TFPT	uc010yej.1	chr19	-	54610319	54619055
chr19	54640537	54643425	chr19	54655304	54658882	KIAA0691	uc010yel.1	chr19	+	54641448	54657577
chr19	54675411	54678649	chr19	54694731	54696616	MBOAT7	uc002qdr.2	chr19	-	54677106	54693733
chr19	55910901	55913889	chr19	55917098	55919947	UBE2S	uc002qkx.1	chr19	-	55912649	55919325
chr19	55985812	55990701	chr19	55995135	55997666	ZNF628	uc002qld.2	chr19	+	55987698	55995854
chr19	58511027	58514793	chr19	58520815	58523271	AK000879	uc002qqy.1	chr19	+	58513428	58518574
chr19	58815789	58818293	chr19	58820850	58825044	LOC113386	uc002qsa.2	chr19	+	58816739	58827011
chr19	58980242	58982842	chr19	58986805	58989854	ZNF324	uc002qsw.1	chr19	+	58978462	58984765
chr2	10261212	10264274	chr2	10272007	10275157	RRM2	uc002rah.2	chr2	+	10262734	10271548
chr2	18734769	18737688	chr2	18740212	18743192	RDH14	uc002rcx.3	chr2	-	18735990	18741959
chr2	20091700	20096595	chr2	20098309	20102604	TTC32	uc002rdg.2	chr2	-	20096517	20101744
chr2	20394552	20400522	chr2	20420683	20427505	SDC1	uc002rdo.1	chr2	-	20400557	20424927
chr2	24297046	24302051	chr2	24303346	24309087	TP53I3	uc002rex.1	chr2	-	24300304	24307201
chr2	25196989	25201101	chr2	25264194	25266222	CR933670	uc002rfv.2	chr2	+	25194995	25262561
chr2	27344080	27348834	chr2	27355158	27358324	ABHD1	uc002rit.2	chr2	+	27346656	27353678
chr2	27542533	27548979	chr2	27577553	27581346	GTF3C2	uc002rju.1	chr2	-	27548720	27579359
chr2	38977058	38979764	chr2	39007414	39010440	GEMIN6	uc002rrb.2	chr2	+	38978675	39009104
chr2	53993911	53997608	chr2	54000470	54005914	CHAC2	uc002rxk.1	chr2	+	53994928	54002287
chr2	66660590	66663373	chr2	66801372	66804359	MEIS2	uc002sdt.2	chr2	+	66662531	66799581
chr2	70518604	70522073	chr2	70526817	70532717	FAM136A	uc002sgq.3	chr2	-	70523108	70529220
chr2	71294797	71297559	chr2	71302576	71304527	NAGK	uc002shp.3	chr2	+	71295407	71305769
chr2	71355283	71358313	chr2	71374309	71376411	MPHOSPH10	uc002sht.1	chr2	+	71357443	71377230
chr2	73458820	73465359	chr2	73477031	73482805	CCT7	uc002siz.2	chr2	+	73461404	73480144
chr2	74609856	74614567	chr2	74614985	74619421	LOC100189589	uc002skz.2	chr2	+	74612844	74621008
chr2	74648733	74650716	chr2	74667506	74670617	RTKN	uc002slc.2	chr2	-	74652988	74667710
chr2	74696122	74704815	chr2	74707381	74711840	CCDC142	uc002slo.2	chr2	-	74699109	74710357
chr2	85771408	85773978	chr2	85784986	85788757	GGCX	uc010yss.1	chr2	-	85776192	85785785
chr2	85803586	85806996	chr2	85810112	85813277	VAMP8	uc002spt.3	chr2	+	85804647	85809155
chr2	96930413	96933686	chr2	96933733	96938753	CIAO1	uc002svs.2	chr2	+	96931883	96939892
chr2	96942639	96946297	chr2	96949721	96953066	KIAA0788	uc002svv.1	chr2	-	96946922	96950612
chr2	97481326	97484166	chr2	97495581	97499570	CNNM3	uc002swy.2	chr2	+	97481990	97501120
chr2	97540854	97543724	chr2	97613039	97616791	FAM178B	uc002sxk.3	chr2	-	97541619	97617238
chr2	99225127	99227969	chr2	99231126	99234291	UNC50	uc002szc.3	chr2	+	99225041	99234975
chr2	99756639	99759461	chr2	99769234	99772730	C2orf15	uc002szk.2	chr2	+	99758184	99767926
chr2	113341013	113344340	chr2	113344677	113349196	CHCHD5	uc002thz.1	chr2	+	113342035	113346617
chr2	121102600	121107978	chr2	121108134	121112198	INHBB	uc002tmn.2	chr2	+	121103718	121109383
chr2	174771106	174774920	chr2	174827436	174829633	SP3	uc002uie.2	chr2	-	174773258	174828947
chr2	178091870	178099266	chr2	178125484	178130472	NFE2L2	uc002ulg.3	chr2	-	178095033	178128617
chr2	201674150	201681655	chr2	201682556	201689007	BZW1	uc010zhh.1	chr2	+	201677930	201683124
chr2	201982638	201986592	chr2	202020197	202023984	CFLAR	uc002uxa.3	chr2	+	201980815	202019298
chr2	219140188	219142154	chr2	219146007	219149354	TMBIM1	uc002vho.1	chr2	-	219138916	219151572
chr2	219250659	219253217	chr2	219257826	219262001	SLC11A1	uc010fvr.2	chr2	+	219251357	219261616
chr2	219522813	219527101	chr2	219534599	219538140	RNF25	uc002vit.2	chr2	-	219528587	219536781
chr2	220109638	220112736	chr2	220115613	220120129	STK16	uc002vko.2	chr2	+	220110191	220115059
chr2	220117230	220120801	chr2	220137909	220141058	TUBA4B	uc002vkv.1	chr2	+	220117964	220136910
chr2	220251163	220258370	chr2	220260938	220266464	CR625347	uc002vlk.1	chr2	+	220253217	220268355
chr2	220414394	220418541	chr2	220419344	220424639	KIAA0657	uc002vmh.1	chr2	-	220419871	220424219
chr2	220416247	220421498	chr2	220433906	220437102	OBSL1	uc010fwk.2	chr2	-	220415465	220436011
chr2	238389584	238399461	chr2	238460840	238470535	MLPH	uc002vws.2	chr2	+	238395052	238463960
chr2	239147401	239151645	chr2	239192664	239197679	PER2	uc002vyc.2	chr2	-	239152679	239197207
chr2	242031392	242037518	chr2	242037980	242041625	MTERFD2	uc002wan.1	chr2	-	242034544	242039910
chr2	242251869	242255736	chr2	242294133	242297708	SEPT2	uc002wbc.2	chr2	+	242254722	242293439
chr2	242427618	242432969	chr2	242436157	242440254	STK25	uc002wbk.2	chr2	-	242434432	242439456
chr2	242639685	242642678	chr2	242661075	242663125	ING5	uc002wcc.1	chr2	+	242641455	242661130
chr20	3733422	3736988	chr20	3744387	3748285	C20orf27	uc002wjf.1	chr20	-	3734155	3748452
chr20	3764518	3769268	chr20	3783696	3790054	CDC25B	uc010zqk.1	chr20	+	3767577	3786759
chr20	23605616	23608298	chr20	23618129	23620935	CST3	uc002wtm.2	chr20	-	23608535	23618574
chr20	30248329	30251510	chr20	30309567	30311794	BCL2L1	uc002wwk.2	chr20	-	30252262	30310133
chr20	32318764	32321525	chr20	32378553	32381315	ZNF341	uc002wzx.2	chr20	+	32319807	32380076
chr20	43587140	43592096	chr20	43593354	43596831	AK057198	uc002xna.1	chr20	-	43592441	43595043
chr20	43951554	43961997	chr20	43968867	43978284	SDC4	uc002xnu.2	chr20	-	43953930	43977064
chr20	44506562	44511614	chr20	44513506	44515965	ZSWIM1	uc010ghi.2	chr20	+	44509847	44513904
chr20	44562361	44564650	chr20	44576155	44580232	PCIF1	uc002xqs.2	chr20	+	44563316	44576660
chr20	44571712	44575491	chr20	44583583	44587136	ZNF335	uc002xqv.2	chr20	-	44577292	44583343
chr20	44633106	44639390	chr20	44641963	44644820	MMP9	uc002xqz.2	chr20	+	44637546	44645199
chr20	45310362	45315893	chr20	45316172	45320125	TP53RK	uc002xsj.2	chr20	-	45313004	45318079
chr20	45336640	45340268	chr20	45366622	45371263	SLC2A10	uc002xsl.2	chr20	+	45338278	45364983
chr20	48736143	48741074	chr20	48766197	48771988	P/OKcl.19	uc010zyq.1	chr20	-	48740273	48770335
chr20	56820073	56824381	chr20	56883475	56885528	PPP4R1L	uc002xyy.1	chr20	-	56820838	56884495
chr20	60715987	60721338	chr20	60756309	60759298	KIAA0693	uc002ybz.1	chr20	+	60718821	60755957
chr20	60985200	60987514	chr20	61000719	61002780	C20orf151	uc002ycw.1	chr20	-	60985292	61002589
chr20	61828592	61831844	chr20	61845063	61849149	YTHDF1	uc002yeh.2	chr20	-	61826783	61847538
chr20	61864458	61870131	chr20	61870202	61876314	BIRC7	uc010gkc.1	chr20	+	61867275	61870957
chr20	61902615	61906127	chr20	61917611	61923741	ARF1GAP	uc011aas.1	chr20	+	61904164	61920848
chr20	62337711	62340851	chr20	62369375	62374861	ZGPAT	uc002ygn.3	chr20	+	62339904	62370459
chr21	40669280	40673804	chr21	40683408	40688475	BRWD1	uc002yxm.2	chr21	-	40668365	40685556
chr21	43914697	43919956	chr21	43932583	43936442	SLC37A1	uc002zbh.1	chr21	+	43916117	43938620
chr21	45720856	45724060	chr21	45730996	45734496	PFKL	uc011afd.1	chr21	+	45719924	45733026
chr22	19830554	19833364	chr22	19840196	19843441	C22orf29	uc002zqg.2	chr22	-	19833661	19842339
chr22	24114357	24117334	chr22	24128158	24130635	MMP11	uc002zxx.2	chr22	+	24115035	24126502
chr22	24371767	24375071	chr22	24382202	24385611	GSTT1	uc002zze.3	chr22	-	24376140	24384284
chr22	30683529	30687986	chr22	30721254	30725114	TBC1D10A	uc011akt.1	chr22	-	30687979	30722894
chr22	30787731	30797808	chr22	30814341	30824907	SEC14L2	uc003ahr.2	chr22	+	30792932	30821277
chr22	31527836	31531036	chr22	31533159	31536038	PLA2G3	uc003aka.2	chr22	-	31530793	31536469
chr22	31671728	31675517	chr22	31685589	31688212	PIK3IP1	uc003akl.2	chr22	-	31677579	31686712
chr22	31717082	31720411	chr22	31737375	31740176	PATZ1	uc003akp.2	chr22	-	31721790	31742249
chr22	36900391	36904612	chr22	36923084	36927184	EIF3D	uc003apq.2	chr22	-	36906897	36924944
chr22	37405906	37409256	chr22	37413327	37416504	TST	uc003aqg.2	chr22	-	37406906	37415473
chr22	37412671	37418447	chr22	37420569	37424913	MPST	uc003aqi.1	chr22	+	37415701	37425853
chr22	37572600	37576587	chr22	37592888	37596169	C1QTNF6	uc003aqz.1	chr22	-	37576205	37594341
chr22	37957951	37962130	chr22	37964459	37967598	CDC42EP1	uc003asz.3	chr22	+	37956470	37965408
chr22	38003560	38006564	chr22	38013017	38015313	GGA1	uc003atb.2	chr22	+	38004502	38014127
chr22	39896509	39901752	chr22	39913024	39918024	SMCR7L	uc003axx.2	chr22	+	39898283	39914136
chr22	41776413	41779479	chr22	41793062	41795013	TEF	uc003azy.2	chr22	+	41777962	41795328
chr22	41830679	41836550	chr22	41839508	41845207	TOB2	uc003azz.1	chr22	-	41829491	41843027
chr22	43010058	43013170	chr22	43039249	43043016	CYB5R3	uc011aps.1	chr22	-	43014813	43040637
chr22	44883733	44886451	chr22	44891529	44895213	LDOC1L	uc003beu.1	chr22	-	44888449	44894005
chr22	46312452	46319062	chr22	46367768	46375906	WNT7B	uc010haa.2	chr22	-	46316247	46368244
chr22	50313037	50315502	chr22	50321200	50324909	CRELD2	uc010hal.2	chr22	+	50312282	50321186
chr22	50607652	50610071	chr22	50620886	50624760	PANX2	uc003bjp.3	chr22	+	50609159	50618723
chr22	50711278	50715799	chr22	50743236	50746282	PLXNB2	uc003bkv.3	chr22	-	50713407	50746002
chr3	9771133	9774538	chr3	9789484	9794828	BRPF1	uc003bse.2	chr3	+	9773433	9789697
chr3	9795563	9799105	chr3	9802044	9806563	CAMK1	uc003bss.2	chr3	-	9799034	9802254
chr3	9832253	9836862	chr3	9848802	9853728	ARPC4	uc003bsz.1	chr3	+	9834226	9848789
chr3	9956289	9959569	chr3	9974092	9976595	IL17RC	uc003btz.2	chr3	+	9958763	9975313
chr3	9974364	9976799	chr3	9984276	9986842	CRELD1	uc003buf.2	chr3	+	9975505	9987088
chr3	14164905	14171175	chr3	14184706	14192328	TMEM43	uc003byk.2	chr3	+	14166439	14185180
chr3	38044852	38048297	chr3	38063004	38066306	PLCD1	uc003chm.2	chr3	-	38048988	38066278
chr3	48633231	48636457	chr3	48640118	48643873	UQCRC1	uc003cua.1	chr3	-	48636431	48643299
chr3	49026681	49029501	chr3	49043138	49047485	P4HTM	uc003cvh.2	chr3	+	49027340	49044579
chr3	49128213	49133667	chr3	49140603	49144982	QARS	uc011bcd.1	chr3	-	49133365	49141944
chr3	49147673	49151336	chr3	49156446	49160099	USP19	uc003cwa.2	chr3	-	49145483	49155553
chr3	50272477	50275826	chr3	50293108	50297512	GNAI2	uc003cyq.1	chr3	+	50273646	50296786
chr3	52008469	52013408	chr3	52014883	52018568	ABHD14A	uc003dco.2	chr3	+	52009041	52015215
chr3	52084349	52086954	chr3	52090579	52093358	DUSP7	uc010hma.2	chr3	-	52085647	52090461
chr3	63848074	63852099	chr3	63895812	63903527	SCA7	uc010hnu.1	chr3	+	63850232	63898599
chr3	101278004	101283890	chr3	101284824	101289467	RG9MTD1	uc003duz.2	chr3	+	101280711	101285087
chr3	119185996	119189166	chr3	119214841	119219392	MDSRP	uc011bja.1	chr3	+	119187784	119213552
chr3	123299485	123306024	chr3	123351415	123361435	BC042384	uc003egk.2	chr3	+	123304402	123349657
chr3	127389827	127393108	chr3	127393230	127399314	ABTB1	uc003ejr.2	chr3	+	127391780	127399762
chr3	128203774	128208044	chr3	128222165	128227070	CR595360	uc003ekp.2	chr3	+	128208074	128221190
chr3	128336864	128339281	chr3	128366892	128369608	RPN1	uc003ekr.1	chr3	-	128338812	128369719
chr3	128888837	128890561	chr3	128902200	128905700	CNBP	uc003elq.3	chr3	-	128886658	128902810
chr3	150124596	150127596	chr3	150177344	150180987	TSC22D2	uc003exv.2	chr3	+	150126787	150177613
chr3	150454538	150458095	chr3	150479860	150483732	SIAH2	uc003eyi.2	chr3	-	150458910	150481263
chr3	161056109	161064612	chr3	161086866	161090740	C3orf57	uc003fee.2	chr3	-	161062580	161089871
chr3	169490062	169493948	chr3	169503041	169506292	MYNN	uc003fft.2	chr3	+	169490852	169505335
chr3	183946098	183954149	chr3	183955295	183961227	VWA5B2	uc011bra.1	chr3	+	183948316	183960116
chr3	183964137	183969247	chr3	183973521	183980325	ECE2	uc003fnh.3	chr3	+	183967444	183976546
chr3	184057786	184066358	chr3	184076343	184081977	CLCN2	uc003foi.2	chr3	-	184064339	184079391
chr4	1572039	1574513	chr4	1579822	1581856	AX748388	uc003gdg.1	chr4	-	1575787	1577966
chr4	1793589	1797439	chr4	1807922	1810201	FGFR3	uc003gdr.3	chr4	+	1795038	1810599
chr4	3488397	3491156	chr4	3497050	3499709	DOK7	uc003ghf.2	chr4	+	3486270	3496208
chr4	7061634	7064173	chr4	7068789	7070424	GRPEL1	uc003gjy.1	chr4	-	7061779	7069800
chr4	17577401	17581759	chr4	17582134	17587986	LAP3	uc010ieg.2	chr4	+	17578926	17587078
chr4	17801713	17804800	chr4	17809545	17812309	DCAF16	uc003gpn.2	chr4	-	17802279	17812381
chr4	39458841	39463230	chr4	39465011	39467066	LIAS	uc003gue.3	chr4	+	39460664	39465857
chr4	78077709	78080820	chr4	78090039	78093129	CCNG2	uc003hkq.3	chr4	+	78078356	78091210
chr4	89437932	89443306	chr4	89443470	89448401	PIGY	uc003hru.1	chr4	-	89442134	89444955
chr4	100009313	100011791	chr4	100020409	100022320	AF086487	uc003hul.1	chr4	+	100010010	100023944
chr4	110736353	110738460	chr4	110741855	110745272	GAR1	uc003hzt.2	chr4	+	110736665	110745891
chr4	119199692	119203873	chr4	119272219	119274707	PRSS12	uc003ica.1	chr4	-	119202416	119273922
chr4	120133055	120136111	chr4	120217896	120220637	USP53	uc003ics.3	chr4	+	120133781	120216672
chr4	152019677	152022958	chr4	152023418	152030587	RPS3A	uc011cie.1	chr4	+	152020753	152025357
chr4	184364836	184367140	chr4	184369962	184374264	CDKN2AIP	uc003ivp.1	chr4	+	184365788	184369049
chr5	43010110	43014868	chr5	43016641	43019944	BC039088	uc003jnc.2	chr5	-	43014522	43018913
chr5	43505860	43508968	chr5	43512640	43515485	C5orf34	uc011cpx.1	chr5	-	43505653	43515187
chr5	56205003	56207968	chr5	56210157	56213304	C5orf35	uc003jqx.2	chr5	+	56205102	56213010
chr5	87955230	87960403	chr5	87966276	87972990	LOC645323	uc010jay.1	chr5	-	87960263	87969157
chr5	109023644	109026605	chr5	109035307	109038345	MAN2A1	uc003kot.1	chr5	+	109025155	109034499
chr5	131743536	131747962	chr5	131823910	131828704	LOC441108	uc010jds.1	chr5	+	131746672	131822549
chr5	134362016	134364910	chr5	134370946	134373824	PITX1	uc010jea.2	chr5	-	134363424	134369964
chr5	137670608	137676394	chr5	137677338	137685685	FAM53C	uc003lcv.2	chr5	+	137673223	137685416
chr5	139925409	139929897	chr5	139935140	139938183	SRA1	uc003lfz.2	chr5	-	139929653	139937041
chr5	140025000	140028952	chr5	140042746	140045992	IK	uc003lgq.2	chr5	+	140027383	140042064
chr5	140996334	141000213	chr5	141012444	141016569	HDAC3	uc003lle.1	chr5	-	141000442	141014729
chr5	141016702	141019604	chr5	141029350	141032018	FLJ00007	uc003llj.2	chr5	-	141018869	141030684
chr5	141221541	141232071	chr5	141253474	141260831	PCDH1	uc003llp.2	chr5	-	141232682	141257944
chr5	148721981	148727001	chr5	148732755	148741534	GRPEL2	uc003lqj.2	chr5	+	148724976	148734145
chr5	170813544	170816381	chr5	170833088	170837032	NPM1	uc003mbh.2	chr5	+	170814797	170833729
chr5	176934945	176939570	chr5	176941545	176945171	DDX41	uc003mhm.2	chr5	-	176938578	176942822
chr5	179123632	179127705	chr5	179156913	179162344	CANX	uc011dgp.1	chr5	+	179125427	179158637
chr5	179158289	179161014	chr5	179220671	179223680	MAML1	uc003mkn.1	chr5	+	179159850	179223512
chr5	179284605	179286874	chr5	179291576	179294262	KIAA0676	uc003mlf.2	chr5	-	179289072	179293872
chr5	180214421	180217578	chr5	180235180	180237535	MGAT1	uc003mmh.3	chr5	-	180217542	180236817
chr5	180272469	180277770	chr5	180283469	180289619	ZFP62	uc003mmn.3	chr5	-	180274610	180287684
chr6	13573129	13575660	chr6	13614471	13617870	SIRT5	uc003nax.2	chr6	+	13574791	13614783
chr6	24705019	24708947	chr6	24719585	24722150	C6orf62	uc003nel.2	chr6	-	24705091	24719403
chr6	30292022	30298505	chr6	30307268	30316530	TRIM39	uc003npz.2	chr6	+	30294255	30311505
chr6	30592745	30596299	chr6	30614362	30617200	C6orf134	uc003nqu.2	chr6	+	30594612	30614588
chr6	30848921	30852134	chr6	30863438	30866846	DDR1	uc010jse.2	chr6	+	30850693	30867931
chr6	31669599	31672395	chr6	31678738	31681695	LY6G6F	uc003nwa.1	chr6	+	31674683	31678372
chr6	31763214	31765296	chr6	31772995	31774616	LSM2	uc003nxg.2	chr6	-	31765175	31774743
chr6	31772539	31775861	chr6	31778971	31783965	HSPA1L	uc003nxh.2	chr6	-	31777396	31782835
chr6	31903042	31906191	chr6	31910964	31913136	DKFZp779M0311	uc003nyh.1	chr6	+	31904742	31913448
chr6	31925609	31929540	chr6	31936946	31940132	SKIV2L	uc003nyn.1	chr6	+	31926580	31937532
chr6	32084412	32089013	chr6	32094421	32098521	ATF6B	uc011dpg.1	chr6	-	32088423	32095535
chr6	32811234	32816552	chr6	32819148	32822603	TAP1	uc011dqi.1	chr6	-	32812986	32820535
chr6	33215694	33218610	chr6	33239281	33241285	VPS52	uc003odm.1	chr6	-	33218048	33239662
chr6	33265454	33269025	chr6	33279198	33283611	TAPBP	uc003odx.1	chr6	-	33267471	33281989
chr6	33685774	33692193	chr6	33704665	33713023	IP6K3	uc010jvf.2	chr6	-	33689442	33714762
chr6	34381677	34385616	chr6	34389849	34392724	RPS10	uc003ojm.2	chr6	-	34385232	34393792
chr6	34842945	34848930	chr6	34853594	34858927	TAF11	uc003ojw.1	chr6	-	34845554	34855819
chr6	35421958	35424743	chr6	35435737	35438070	FANCE	uc003oko.1	chr6	+	35420137	35434881
chr6	36561936	36563832	chr6	36570768	36574974	SFRS3	uc003omj.2	chr6	+	36562089	36572243
chr6	42846593	42849480	chr6	42856215	42859253	RPL7L1	uc003osu.2	chr6	+	42848598	42857596
chr6	42895604	42899473	chr6	42903551	42906317	UNQ1934	uc003osy.2	chr6	+	42896859	42905945
chr6	42980244	42984574	chr6	42984769	42991143	KLHDC3	uc003otl.2	chr6	+	42981976	42989029
chr6	43018905	43023469	chr6	43023868	43029960	MRPL2	uc003ots.1	chr6	-	43021766	43027242
chr6	43137847	43144400	chr6	43146420	43152065	SRF	uc003oui.2	chr6	+	43138919	43149243
chr6	43736571	43743199	chr6	43756095	43768896	VEGFA	uc003owd.2	chr6	+	43737952	43754221
chr6	64282576	64284766	chr6	64287471	64291682	PTP4A1	uc003pel.2	chr6	+	64281919	64293488
chr6	86325042	86328665	chr6	86351801	86354171	SYNCRIP	uc003pkz.2	chr6	-	86323692	86351169
chr6	153303456	153306252	chr6	153322464	153326095	MTRF1L	uc003qpi.3	chr6	-	153308400	153323925
chr6	170099501	170105630	chr6	170117649	170127753	PHF10	uc011egy.1	chr6	-	170104003	170124106
chr7	1125816	1129457	chr7	1130857	1134686	GPER	uc003sjz.1	chr7	+	1126442	1133451
chr7	1196788	1201610	chr7	1207222	1211022	AK090593	uc003skf.1	chr7	+	1200127	1205594
chr7	1468862	1473010	chr7	1497156	1501439	MICALL2	uc003skj.3	chr7	-	1473995	1499109
chr7	1505298	1509617	chr7	1511272	1515249	KIAA1440	uc003skm.1	chr7	-	1509912	1515720
chr7	1537800	1541619	chr7	1542397	1545971	INTS1	uc003skq.2	chr7	-	1537980	1544018
chr7	2282079	2285724	chr7	2285867	2290193	NUDT1	uc003slp.1	chr7	+	2281856	2290780
chr7	5427419	5432982	chr7	5463839	5467222	TNRC18B	uc003sok.1	chr7	-	5429102	5465045
chr7	27160022	27165223	chr7	27168443	27171910	BC035889	uc003syl.2	chr7	+	27161537	27168378
chr7	44151608	44155695	chr7	44160860	44163537	POLD2	uc003tke.3	chr7	-	44154286	44161794
chr7	56118945	56123487	chr7	56130683	56133199	CCT6A	uc003trl.1	chr7	+	56119377	56131682
chr7	73093093	73095750	chr7	73118609	73121653	WBSCR22	uc003tyw.1	chr7	+	73097897	73119491
chr7	75506849	75512023	chr7	75512390	75517228	RHBDD2	uc003udv.1	chr7	+	75508316	75518244
chr7	77420556	77425429	chr7	77426224	77429606	TMEM60	uc003ugn.2	chr7	-	77423045	77427747
chr7	98988826	98993442	chr7	99003830	99006762	PDAP1	uc003uqe.2	chr7	-	98992589	99006292
chr7	99051349	99054241	chr7	99062406	99066062	ATP5J2	uc003uql.2	chr7	-	99055784	99063808
chr7	99612087	99615368	chr7	99617122	99622083	ZKSCAN1	uc003usj.2	chr7	+	99613218	99622582
chr7	99697523	99701716	chr7	99704194	99707424	AP4M1	uc011kjg.1	chr7	+	99699129	99703781
chr7	99703886	99707650	chr7	99715181	99719590	TAF6	uc003uti.2	chr7	-	99704693	99716973
chr7	100200034	100203860	chr7	100204915	100208932	PCOLCE	uc003uvo.2	chr7	+	100199881	100205801
chr7	100397240	100401541	chr7	100421214	100427156	EPHB4	uc003uwm.1	chr7	-	100400186	100423148
chr7	100730158	100734235	chr7	100736697	100739823	TRIM56	uc003uxr.2	chr7	+	100728785	100735008
chr7	100859707	100861715	chr7	100865094	100868231	ZNHIT1	uc003uye.2	chr7	+	100860984	100867469
chr7	100878120	100882691	chr7	100884974	100889908	FIS1	uc003uyj.3	chr7	-	100882894	100888371
chr7	101915444	101918851	chr7	101927361	101932016	Nbla10317	uc003uyz.2	chr7	+	101917444	101927249
chr7	140371761	140374762	chr7	140393210	140398263	ADCK2	uc003vvy.1	chr7	+	140372952	140394908
chr7	148761162	148767929	chr7	148786488	148789845	ZNF786	uc003wfh.2	chr7	-	148766732	148787869
chr7	150073650	150075921	chr7	150097347	150099928	ZNF775	uc003whf.1	chr7	+	150076405	150095719
chr7	155586686	155591445	chr7	155601402	155605455	SHH	uc003wmh.1	chr7	-	155592735	155601766
chr7	156431818	156435144	chr7	156449463	156451786	RNF32	uc010lql.1	chr7	+	156433440	156451264
chr8	21963012	21971073	chr8	21983469	21991933	HR	uc003xas.2	chr8	-	21971933	21988565
chr8	22435418	22440697	chr8	22455260	22458681	PDLIM2	uc003xcc.1	chr8	+	22437983	22455538
chr8	56979267	56982031	chr8	56984638	56987414	RPS20	uc003xsm.2	chr8	-	56980738	56987140
chr8	91635184	91639913	chr8	91654926	91659174	TMEM64	uc003yen.2	chr8	-	91634222	91658133
chr8	96033508	96038135	chr8	96084547	96089897	C8orf38	uc011lgs.1	chr8	+	96037220	96088396
chr8	99955313	99958545	chr8	99964314	99967285	OSR2	uc003yir.2	chr8	+	99956630	99964324
chr8	101711954	101715661	chr8	101730644	101734304	PABPC1	uc011lhc.1	chr8	-	101715143	101734220
chr8	102367521	102373296	chr8	102378275	102383323	FKSG17	uc010mbs.1	chr8	+	102374021	102384935
chr8	104412738	104416183	chr8	104425864	104428511	SLC25A32	uc003yll.2	chr8	-	104410866	104427468
chr8	125485166	125492775	chr8	125496581	125502388	RNF139	uc003yrc.2	chr8	+	125487007	125500858
chr8	128803705	128819463	chr8	128866781	128886414	MYC	uc003ysj.2	chr8	+	128806778	128867565
chr8	143738746	143745498	chr8	143749109	143753291	JRK	uc003ywo.2	chr8	-	143738874	143751401
chr8	143818532	143821653	chr8	143825713	143828644	SLURP1	uc003ywy.2	chr8	-	143822362	143823829
chr8	143862511	143868178	chr8	143868339	143872423	LY6D	uc003yxf.1	chr8	-	143866297	143868008
chr8	144326297	144329289	chr8	144360782	144364948	ZFP41	uc003yxv.2	chr8	+	144328990	144359099
chr8	144373631	144376024	chr8	144382986	144385166	ZNF696	uc003yxy.3	chr8	+	144373558	144382118
chr8	144651569	144654849	chr8	144662548	144667227	NAPRT1	uc003yym.3	chr8	-	144656955	144660513
chr8	144659036	144663590	chr8	144674969	144683664	EEF1D	uc011lki.1	chr8	-	144661897	144679310
chr8	144988905	144992403	chr8	145016065	145019862	PLEC1	uc003zac.1	chr8	-	144989320	145016692
chr8	145048249	145054951	chr8	145055160	145061681	PARP10	uc003zak.3	chr8	-	145051320	145059496
chr8	145614423	145618149	chr8	145618292	145622998	ADCK5	uc003zci.2	chr8	+	145617094	145618451
chr8	145616323	145620104	chr8	145633738	145638340	CPSF1	uc003zcj.2	chr8	-	145618446	145634733
chr8	146051176	146056096	chr8	146062773	146068411	ZNF7	uc003zeg.3	chr8	+	146052902	146068605
chr8	146069484	146074984	chr8	146075294	146079794	COMMD5	uc003zem.2	chr8	-	146075551	146078451
chr9	19370058	19373995	chr9	19378736	19381280	RPS6	uc003znu.1	chr9	-	19376253	19380215
chr9	21326879	21332228	chr9	21332519	21336640	KLHL9	uc003zoy.2	chr9	-	21331018	21335429
chr9	33249378	33251734	chr9	33263127	33265355	BAG1	uc003zsi.2	chr9	-	33252471	33264648
chr9	35101720	35105079	chr9	35109143	35115042	KIAA1539	uc003zwl.2	chr9	-	35104119	35111371
chr9	88958914	88964853	chr9	88966191	88971160	DKFZp451K134	uc010mqf.1	chr9	-	88965360	88969369
chr9	90340691	90343904	chr9	90346984	90349753	CTSL1	uc004aph.2	chr9	+	90340973	90346382
chr9	95076234	95083811	chr9	95086016	95089943	NOL8	uc004arx.2	chr9	-	95080897	95087633
chr9	95880621	95884074	chr9	95892817	95896414	NINJ1	uc004atg.3	chr9	-	95883771	95896570
chr9	98626986	98632352	chr9	98635644	98639988	NAG11	uc004avs.2	chr9	-	98632565	98638259
chr9	101973790	101980645	chr9	101980734	101985159	ALG2	uc004azg.2	chr9	-	101978707	101984246
chr9	114360223	114365174	chr9	114392834	114395366	C9orf29	uc004bfk.3	chr9	-	114365110	114393569
chr9	123603808	123605526	chr9	123617590	123620062	LOC253039	uc004bkq.2	chr9	+	123605319	123616644
chr9	123616814	123619551	chr9	123628471	123631105	PHF19	uc011lyf.1	chr9	-	123617930	123631159
chr9	124097832	124101344	chr9	124130826	124133326	STOM	uc004blh.2	chr9	-	124101353	124132545
chr9	125673992	125680512	chr9	125689343	125695798	ZBTB26	uc004bnj.2	chr9	-	125680378	125693544
chr9	127629275	127633339	chr9	127637561	127642217	ARPC5L	uc004bpa.3	chr9	+	127631483	127639695
chr9	130696858	130707350	chr9	130738712	130744461	FAM102A	uc004bsx.1	chr9	-	130702860	130742495
chr9	131772584	131774524	chr9	131788060	131790568	SH3GLB2	uc004bwv.2	chr9	-	131770313	131790579
chr9	132372937	132379118	chr9	132379439	132384059	C9orf50	uc004byb.3	chr9	-	132374505	132383022
chr9	132574384	132578572	chr9	132584965	132587052	TOR1A	uc004byl.2	chr9	-	132575221	132586441
chr9	132585040	132587960	chr9	132595026	132598569	C9orf78	uc004byo.2	chr9	-	132589564	132595796
chr9	136265689	136269046	chr9	136281743	136283832	XPMC2H	uc011mde.1	chr9	-	136271187	136283130
chr9	137216377	137219479	chr9	137332325	137335299	RXRA	uc004cfb.2	chr9	+	137218315	137332431
chr9	137304502	137310830	chr9	137314512	137318975	NR2B1	uc004cfd.1	chr9	+	137309003	137319016
chr9	139264601	139269723	chr9	139291012	139295555	SNAPC4	uc004chh.2	chr9	-	139270029	139292889
chr9	139287613	139299438	chr9	139302057	139308530	SDCCAG3	uc004chi.2	chr9	-	139296374	139305054
chr9	139330593	139334816	chr9	139376725	139380136	SEC16A	uc004chx.2	chr9	-	139334548	139377507
chr9	139835431	139837413	chr9	139842327	139846771	C8G	uc004cka.2	chr9	+	139839697	139841426
chr9	139938634	139945308	chr9	139945442	139948679	ENTPD2	uc004ckw.1	chr9	-	139942552	139948505
chr9	140194429	140199188	chr9	140313207	140319401	EXD3	uc004cmp.2	chr9	-	140201347	140317714
chr9	140340258	140343680	chr9	140346274	140348761	NELF	uc011mex.1	chr9	-	140342024	140349159
chr9	140470526	140476411	chr9	140480197	140487037	ZMYND19	uc004cno.1	chr9	-	140476530	140484937
chrX	47510604	47512691	chrX	47517121	47519489	UXT	uc004dim.2	chrX	-	47511195	47518516
chrX	48767925	48770422	chrX	48774984	48777675	PIM2	uc004dls.2	chrX	-	48770460	48776413
chrX	48929612	48934713	chrX	48935898	48939365	WDR45	uc004dmj.1	chrX	-	48932091	48935406
chrX	49031250	49034477	chrX	49039537	49042014	PRICKLE3	uc011mmv.1	chrX	-	49031905	49041346
chrX	53447742	53451193	chrX	53459861	53463064	RIBC1	uc011mog.1	chrX	+	53449838	53457793
chrX	54834874	54837703	chrX	54842621	54845587	MAGED2	uc004dtl.1	chrX	+	54834796	54842445
chrX	55025508	55029548	chrX	55030835	55035676	APEX2	uc004dtz.2	chrX	+	55026779	55034211
chrX	100602150	100605138	chrX	100644823	100647667	BTK	uc010nno.2	chrX	-	100604434	100645770
chrX	102931608	102934926	chrX	102940790	102943440	MORF4L2	uc004ekw.2	chrX	-	102930427	102941155
chrX	153047913	153051321	chrX	153057172	153060184	IDH3G	uc004fio.2	chrX	-	153051221	153059814
chrX	153207917	153215920	chrX	153234432	153239054	HCFC1	uc004fjp.2	chrX	-	153213009	153236819
chrX	153274735	153280990	chrX	153281283	153286184	IRAK1	uc004fju.2	chrX	-	153279492	153285266
chrX	153686979	153692295	chrX	153697374	153703792	PLXNA3	uc004flm.2	chrX	+	153686622	153701984
chrX	153989640	153993608	chrX	154001678	154004795	DKC1	uc010nvf.2	chrX	+	153991030	154005963
chrX	154254061	154256708	chrX	154285022	154287797	FUNDC2	uc004fmw.2	chrX	+	154255063	154285190
chrX	154298029	154301058	chrX	154305099	154309162	BRCC3	uc011mzy.1	chrX	+	154299709	154305564
