# Supplementary material for: Dynamic transitions in RNA polymerase II density profiles during transcription termination
Source: HighWire-hosted journal article supplement (doi:10.1101/gr.138057.112), 2012-06-08
Supplement: SupplementaryTable5.xlsx [file SupplementaryTable5.xlsx]

## Sheet: MouseES
Peak Group	Term	Count	%	PValue	Genes	List.Total	Pop.Hits	Pop.Total	Fold.Enrichment	Bonferroni	Benjamini	FDR
RNAP II total no Ser5P	RNA processing	45	0.65924407	3.065661e-11	RALY, PPP4R2, SNRPB2, RG9MTD1, RBM5, NOB1, UTP15, SF3B4, SF3B3, RPP14, PNN, SFRS5, RRP1B, PRMT5, PCBP1, DBR1, PABPC1, IMP4, MTO1, ZCCHC8, PABPN1, BCAS2, RRP1, EXOSC2, SF1, EXOSC1, SFRS1, DDX5, SF3A1, PRPF6, RSL1D1, PA2G4, DDX56, 2310079F23RIK, RPS14, SFPQ, SNRPA, PHF5A, CPSF4, THOC3, CSTF1, TRUB2, PRPF38B, SSU72, SNRPG	447	437	13588	3.130250	5.619352e-08	5.619352e-08	5.217179e-08
RNAP II total no Ser5P	mRNA metabolic process	32	0.46879578	1.842084e-08	RALY, PPP4R2, SNRPB2, RBM5, SF3B4, SF3B3, PNN, ZFP36L2, SFRS5, WIBG, PCBP1, PRMT5, DBR1, PABPC1, ZCCHC8, BCAS2, PABPN1, SF1, ELAVL1, SFRS1, DDX5, SF3A1, PRPF6, SFPQ, SNRPA, CPSF4, PHF5A, CSTF1, THOC3, PRPF38B, SSU72, SNRPG	447	302	13588	3.221002	3.376483e-05	1.688256e-05	3.134883e-05
RNAP II total no Ser5P	mRNA processing	29	0.42484618	3.863707e-08	RALY, PPP4R2, SNRPB2, RBM5, SF3B4, SF3B3, PNN, SFRS5, PRMT5, PCBP1, DBR1, PABPC1, ZCCHC8, BCAS2, PABPN1, SF1, SFRS1, DDX5, SF3A1, PRPF6, SFPQ, SNRPA, CPSF4, PHF5A, CSTF1, THOC3, PRPF38B, SSU72, SNRPG	447	262	13588	3.364687	7.081924e-05	2.360697e-05	6.575306e-05
RNAP II total no Ser5P	translation	32	0.46879578	6.560811e-08	RPL13, RPL15, RPS15A, RPL39, IARS, EIF3C, RPL30, RPS27, EIF3B, RPL6, PARS2, RPL34, ICT1, EIF3F, RPL11, RPL36AL, EEF1A1, 2810006K23RIK, SARS, MRPS24, GARS, RPL26, EIF1A, RSL1D1, 2810422J05RIK, RPL22, EIF4H, RPS14, RPS13, RPL37A, EIF4E2, MRP63	447	319	13588	3.049350	1.202524e-04	3.006447e-05	1.116527e-04
RNAP II total no Ser5P	RNA splicing	24	0.35159684	1.883983e-07	BCAS2, RALY, PPP4R2, SNRPB2, RBM5, SF1, SFRS1, DDX5, SF3B4, SF3A1, SF3B3, PRPF6, PNN, SFRS5, PRMT5, SFPQ, SNRPA, DBR1, PABPC1, PHF5A, THOC3, PRPF38B, ZCCHC8, SNRPG	447	201	13588	3.629637	3.452744e-04	6.906442e-05	3.206182e-04
RNAP II total no Ser5P	chromosome organization	31	0.45414591	2.688439e-05	MORF4L1, HMGN1, NEK2, SETD1B, EZH2, MORF4L2, NAP1L1, CBX3, HAT1, CBX5, SET, PRMT5, PRMT6, EED, RNF168, MYST2, DNMT3B, BUB3, TRP53, TBL1XR1, NUSAP1, ARID1A, MBD3, MCM2, H2AFJ, MIS12, SUV420H2, SUZ12, PHF17, SMARCC1, H3F3A	447	404	13588	2.332536	4.808521e-02	8.179656e-03	4.574237e-02
RNAP II total no Ser5P	regulation of transcription	107	1.56753589	2.816824e-05	MORF4L1, BC027344, MORF4L2, CBX3, TCEAL8, CNOT7, CITED2, PNN, CBX5, TAF5L, CDCA7, SFRS5, EED, RARA, MYST2, FIZ1, PITX2, NODAL, CSDA, MED10, SUV420H2, SUZ12, PA2G4, MNT, DNTTIP2, NFE2L2, HMGB1, HMGB2, CNBP, SETD1B, SOX4, TXN1, ZFP459, JRK, ZFP568, DNMT3B, EWSR1, KLF5, TRP53, UTF1, SMAD7, KLF10, KLF16, SKI, ZFP445, DDX5, USF1, SREBF2, NRF1, UPF3B, SALL4, SMARCC1, AIRE, B230315N10RIK, KLF4, TCF15, D…	447	2227	13588	1.460534	5.032277e-02	7.349022e-03	4.792628e-02
RNAP II total no Ser5P	negative regulation of transcription, DNA-dependent	26	0.38089657	2.980424e-05	PPARD, HAT1, CBX3, TXN1, CBFA2T2, CBX5, CITED2, PRMT6, GATAD2A, PER1, RARA, DNMT3B, TRP53, TBL1XR1, NODAL, SIRT6, SKI, IRF2BP1, MBD3, SUZ12, PA2G4, SALL4, ID2, ID1, KLF4, DNAJB5	447	308	13588	2.566083	5.316648e-02	6.805735e-03	5.070916e-02
RNAP II total no Ser5P	negative regulation of RNA metabolic process	26	0.38089657	3.315447e-05	PPARD, HAT1, CBX3, TXN1, CBFA2T2, CBX5, CITED2, PRMT6, GATAD2A, PER1, RARA, DNMT3B, TRP53, TBL1XR1, NODAL, SIRT6, SKI, IRF2BP1, MBD3, SUZ12, PA2G4, SALL4, ID2, ID1, KLF4, DNAJB5	447	310	13588	2.549527	5.896332e-02	6.729826e-03	5.640775e-02
RNAP II total no Ser5P	chromatin organization	26	0.38089657	4.317132e-05	MORF4L1, HMGN1, SETD1B, EZH2, MORF4L2, NAP1L1, HAT1, CBX3, CBX5, SET, PRMT5, PRMT6, EED, RNF168, MYST2, DNMT3B, TBL1XR1, ARID1A, H2AFJ, MCM2, MBD3, SUV420H2, SUZ12, PHF17, SMARCC1, H3F3A	447	315	13588	2.509059	7.608457e-02	7.882245e-03	7.344413e-02
RNAP II total no Ser5P	protein amino acid alkylation	9	0.13184881	6.677601e-05	SUZ12, SUV420H2, BTG2, 4833442J19RIK, PRMT5, EZH2, PRMT6, EED, ILF3	447	43	13588	6.362416	1.152096e-01	1.106600e-02	1.135796e-01
RNAP II total no Ser5P	protein amino acid methylation	9	0.13184881	6.677601e-05	SUZ12, SUV420H2, BTG2, 4833442J19RIK, PRMT5, EZH2, PRMT6, EED, ILF3	447	43	13588	6.362416	1.152096e-01	1.106600e-02	1.135796e-01
RNAP II total no Ser5P	cellular response to stress	30	0.43949604	6.739223e-05	MORF4L1, HMGN1, RAD23B, HMGB2, ZMAT3, UNG, MORF4L2, RBX1, GPX1, RAD21, PRMT6, RNF168, PHLDA3, EXO1, TRP53, SSRP1, DHX9, 1110054O05RIK, RAD9B, GIYD2, TOPORS, GTF2H1, CCND1, CDKN1A, BTG2, SFPQ, CTSD, NFE2L2, ATG16L1, PPP1R15B	447	404	13588	2.257293	1.162085e-01	1.024170e-02	1.146271e-01
RNAP II total no Ser5P	response to DNA damage stimulus	24	0.35159684	7.498853e-05	EXO1, TRP53, MORF4L1, HMGN1, SSRP1, RAD23B, HMGB2, 1110054O05RIK, ZMAT3, UNG, MORF4L2, RAD9B, GIYD2, TOPORS, RBX1, GTF2H1, CCND1, CDKN1A, RAD21, BTG2, SFPQ, PRMT6, RNF168, PHLDA3	447	287	13588	2.542011	1.284300e-01	1.051807e-02	1.275399e-01
RNAP II total no Ser5P	ncRNA metabolic process	19	0.27834749	1.201433e-04	RRP1, SARS, RG9MTD1, EXOSC2, UTP15, NOB1, GARS, EXOSC1, RPP14, IARS, DDX56, PA2G4, 2310079F23RIK, RRP1B, PARS2, RPS14, TRUB2, IMP4, MTO1	447	202	13588	2.859238	1.976704e-01	1.560804e-02	2.042648e-01
RNAP II total no Ser5P	transcription	86	1.25988866	1.677179e-04	MORF4L1, PPARD, BC027344, ZFP42, MORF4L2, EZH2, CBX3, ZKSCAN1, TCEAL8, CNOT7, CITED2, GLI1, PNN, BZW1, TAF5L, SFRS5, CDCA7, PRMT5, PRMT6, GTF2A2, EED, RARA, MYST2, FIZ1, KHDRBS1, TBL1XR1, SF1, ADNP, MBD3, IRF2BP1, MCM2, CSDA, MED10, GTF2H1, SUV420H2, SUZ12, MED7, PA2G4, BTG2, MNT, DNTTIP2, NFE2L2, MED1, ZFP62, CNBP, NACA, POLR2E, SETD1B, SOX4, NFYC, ZFP459, POLR2A, ZFP568, ZFP192, GATAD2A, PER1, …	447	1772	13588	1.475308	2.646824e-01	2.028822e-02	2.850416e-01
RNAP II total no Ser5P	negative regulation of transcription	27	0.39554644	2.428796e-04	PPARD, HAT1, CBX3, TXN1, CBFA2T2, CBX5, CITED2, PRMT6, GATAD2A, PER1, RARA, DNMT3B, KHDRBS1, TRP53, TBL1XR1, NODAL, SIRT6, SKI, IRF2BP1, MBD3, SUZ12, PA2G4, SALL4, ID2, ID1, KLF4, DNAJB5	447	372	13588	2.206322	3.593374e-01	2.744463e-02	4.125327e-01
RNAP II total no Ser5P	negative regulation of nucleobase, nucleoside, nucleotide and nucleic acid metabolic process	28	0.41019631	2.907629e-04	PPARD, CBX3, HAT1, TXN1, CBFA2T2, CBX5, CITED2, PRMT6, GATAD2A, PER1, RARA, DNMT3B, KHDRBS1, TRP53, TBL1XR1, NODAL, SIRT6, SKI, IRF2BP1, MBD3, SUZ12, PA2G4, SALL4, ID2, ID1, ATPIF1, KLF4, DNAJB5	447	397	13588	2.143954	4.131851e-01	3.086915e-02	4.936736e-01
RNAP II total no Ser5P	covalent chromatin modification	12	0.17579842	3.011564e-04	MORF4L1, SUZ12, SUV420H2, PHF17, EZH2, PRMT6, EED, HAT1, RNF168, MBD3, MYST2, DNMT3B	447	96	13588	3.799776	4.242621e-01	3.020675e-02	5.112776e-01
RNAP II total no Ser5P	negative regulation of nitrogen compound metabolic process	28	0.41019631	3.363883e-04	PPARD, CBX3, HAT1, TXN1, CBFA2T2, CBX5, CITED2, PRMT6, GATAD2A, PER1, RARA, DNMT3B, KHDRBS1, TRP53, TBL1XR1, NODAL, SIRT6, SKI, IRF2BP1, MBD3, SUZ12, PA2G4, SALL4, ID2, ID1, ATPIF1, KLF4, DNAJB5	447	401	13588	2.122568	4.602793e-01	3.193697e-02	5.709304e-01
RNAP II total no Ser5P	negative regulation of cellular biosynthetic process	29	0.42484618	4.497401e-04	PPARD, CBX3, HAT1, TXN1, CBFA2T2, CBX5, CITED2, EIF4EBP1, INSIG1, PRMT6, GATAD2A, PER1, RARA, DNMT3B, KHDRBS1, TRP53, TBL1XR1, NODAL, SIRT6, SKI, IRF2BP1, MBD3, SUZ12, PA2G4, SALL4, ID2, ID1, KLF4, DNAJB5	447	430	13588	2.050112	5.615717e-01	4.038964e-02	7.626230e-01
RNAP II total no Ser5P	biopolymer methylation	10	0.14649868	4.995604e-04	SUZ12, SUV420H2, BTG2, 4833442J19RIK, PRMT5, EZH2, PRMT6, EED, ILF3, DNMT3B	447	71	13588	4.281438	5.998529e-01	4.267791e-02	8.467655e-01
RNAP II total no Ser5P	negative regulation of biosynthetic process	29	0.42484618	5.232943e-04	PPARD, CBX3, HAT1, TXN1, CBFA2T2, CBX5, CITED2, EIF4EBP1, INSIG1, PRMT6, GATAD2A, PER1, RARA, DNMT3B, KHDRBS1, TRP53, TBL1XR1, NODAL, SIRT6, SKI, IRF2BP1, MBD3, SUZ12, PA2G4, SALL4, ID2, ID1, KLF4, DNAJB5	447	434	13588	2.031217	6.168963e-01	4.267404e-02	8.868267e-01
RNAP II total no Ser5P	cell junction organization	7	0.10254908	5.301258e-04	DLC1, CD9, JUB, PRKCI, CXADR, FN1, NUMBL	447	32	13588	6.649609	6.216661e-01	4.137942e-02	8.983548e-01
RNAP II total no Ser5P	ribonucleoprotein complex biogenesis	14	0.20509815	5.711261e-04	RRP1, GTPBP10, EXOSC2, UTP15, NOB1, RBM5, IPO9, EXOSC1, DDX56, PA2G4, RRP1B, PRMT5, RPS14, IMP4	447	137	13588	3.106386	6.490717e-01	4.269403e-02	9.675169e-01
RNAP II total no Ser5P	negative regulation of macromolecule biosynthetic process	28	0.41019631	6.425952e-04	PPARD, CBX3, HAT1, TXN1, CBFA2T2, CBX5, CITED2, EIF4EBP1, PRMT6, GATAD2A, PER1, RARA, DNMT3B, KHDRBS1, TRP53, TBL1XR1, NODAL, SIRT6, SKI, IRF2BP1, MBD3, SUZ12, PA2G4, SALL4, ID2, ID1, KLF4, DNAJB5	447	418	13588	2.036244	6.921848e-01	4.603684e-02	1.087967e+00
RNAP II total no Ser5P	rRNA processing	10	0.14649868	6.798965e-04	DDX56, PA2G4, RRP1, RRP1B, RPS14, UTP15, EXOSC2, NOB1, EXOSC1, IMP4	447	74	13588	4.107866	7.125408e-01	4.681761e-02	1.150778e+00
RNAP II total no Ser5P	ncRNA processing	15	0.21974802	7.087032e-04	RRP1, RG9MTD1, EXOSC2, UTP15, NOB1, EXOSC1, RPP14, PA2G4, DDX56, 2310079F23RIK, RRP1B, RPS14, IMP4, TRUB2, MTO1	447	158	13588	2.885906	7.273356e-01	4.699023e-02	1.199259e+00
RNAP II total no Ser5P	rRNA metabolic process	10	0.14649868	7.506478e-04	DDX56, PA2G4, RRP1, RRP1B, RPS14, UTP15, EXOSC2, NOB1, EXOSC1, IMP4	447	75	13588	4.053095	7.475278e-01	4.797033e-02	1.269811e+00
RNAP II total and Ser5P	translation	31	1.14814815	3.216787e-21	RPL19, RPL14, EIF5, RPLP2, RPL37, RPL22L1, RPS26, RPS29, RPL7, RPS3A, RPL9, RPLP1, RPL3, EIF1, RPS20, RPL12, RPS23, MRPL52, DENR, RPS4X, RPL28, RPS7, RPS16, RPL23, RPS17, RPL21, RPL7L1, RPS15, EEF1G, UBB, KPNA2	136	319	13588	9.709294	2.711752e-18	2.711752e-18	4.971737e-18
no Peak	establishment of protein localization	121	0.59310818	7.158851e-12	AP4E1, XPO5, VPS52, CASK, VPS53, VPS33A, HOOK3, KIF13A, HOOK1, CRY2, TIMM9, TRAK1, RAB23, VPS13A, NUP37, STAM, RAB21, RAB27A, SCAMP1, RINT1, NUPL1, CLPX, LCA5, PEX26, RAB15, RAB13, ERC1, VPS26A, PACS1, SNX9, SDAD1, AFTPH, DERL1, STX7, NAPG, STAM2, MTX2, SNX2, SNX4, LMAN1, RAB9, CHMP2B, TRAM2, STX12, SPNB2, SEC61A2, MYO1C, RAB33B, PLEKHA8, RABEP1, STXBP3A, COPA, SEC24A, HPS4, VPS37A, AP1S3, IMMP2L…	1336	656	13588	1.875990	2.251452e-08	2.251452e-08	1.295847e-08
no Peak	protein transport	120	0.58820646	9.182137e-12	AP4E1, XPO5, VPS52, CASK, VPS53, VPS33A, HOOK3, KIF13A, HOOK1, CRY2, TIMM9, TRAK1, RAB23, VPS13A, NUP37, STAM, RAB21, RAB27A, SCAMP1, RINT1, NUPL1, CLPX, LCA5, PEX26, RAB15, RAB13, ERC1, VPS26A, PACS1, SNX9, SDAD1, AFTPH, DERL1, STX7, NAPG, STAM2, MTX2, SNX2, SNX4, LMAN1, RAB9, CHMP2B, TRAM2, STX12, SPNB2, SEC61A2, MYO1C, RAB33B, PLEKHA8, RABEP1, STXBP3A, COPA, SEC24A, HPS4, VPS37A, AP1S3, IMMP2L…	1336	651	13588	1.874776	2.887770e-08	1.443885e-08	1.662087e-08
no Peak	protein localization	133	0.65192883	1.350575e-11	AP4E1, XPO5, VPS52, CASK, VPS53, VPS33A, HOOK3, KIF13A, HOOK1, CRY2, ANK2, TIMM9, TRAK1, RAB23, STAM, VPS13A, NUP37, RAB21, RAB27A, SCAMP1, RINT1, NUPL1, CLPX, LCA5, FGFR1OP, PEX26, RAB15, AKAP7, RAB13, ERC1, VPS26A, PACS1, SNX9, AFTPH, SDAD1, DERL1, STX7, NAPG, STAM2, MTX2, SNX2, SNX4, AKAP10, LMAN1, RAB9, CHMP2B, TRAM2, STX12, SPNB2, SEC61A2, MYO1C, NUF2, RAB33B, PLEKHA8, RABEP1, STXBP3A, COPA,…	1336	753	13588	1.796411	4.247559e-08	1.415853e-08	2.444728e-08
no Peak	phosphorus metabolic process	145	0.71074947	7.977096e-11	PRPF4B, STK38, TBK1, 4930444A02RIK, CASK, PTPN21, PRKG1, PRKX, MAP3K7, MAP3K4, AAK1, MAP3K9, B230120H23RIK, PRKACB, FRS2, INSR, MAP2K5, PTPRJ, PTPRK, ROCK1, CSNK1G1, PTPRG, STK24, ROCK2, PTPRS, RPS6KC1, CDKL3, STK4, STK3, MAPK1, EIF2AK1, SCYL2, PTPRV, MAPK4, RIPK2, MAPK9, RIPK4, CSNK1G3, NEK4, EIF2AK4, NEK7, FGFR2, SSH1, NEK1, HUS1, PTK7, DUSP10, BMPR2, STK17B, MAPKAPK3, PXK, ATP6V1B2, DUSP11, UH…	1336	866	13588	1.702939	2.508797e-07	6.271992e-08	1.443965e-07
no Peak	phosphate metabolic process	145	0.71074947	7.977096e-11	PRPF4B, STK38, TBK1, 4930444A02RIK, CASK, PTPN21, PRKG1, PRKX, MAP3K7, MAP3K4, AAK1, MAP3K9, B230120H23RIK, PRKACB, FRS2, INSR, MAP2K5, PTPRJ, PTPRK, ROCK1, CSNK1G1, PTPRG, STK24, ROCK2, PTPRS, RPS6KC1, CDKL3, STK4, STK3, MAPK1, EIF2AK1, SCYL2, PTPRV, MAPK4, RIPK2, MAPK9, RIPK4, CSNK1G3, NEK4, EIF2AK4, NEK7, FGFR2, SSH1, NEK1, HUS1, PTK7, DUSP10, BMPR2, STK17B, MAPKAPK3, PXK, ATP6V1B2, DUSP11, UH…	1336	866	13588	1.702939	2.508797e-07	6.271992e-08	1.443965e-07
no Peak	phosphorylation	120	0.58820646	4.950794e-09	PRPF4B, STK38, TBK1, 4930444A02RIK, CASK, PRKG1, PRKX, MAP3K7, MAP3K4, AAK1, MAP3K9, B230120H23RIK, PRKACB, FRS2, INSR, MAP2K5, ROCK1, CSNK1G1, STK24, ROCK2, RPS6KC1, CDKL3, STK4, STK3, MAPK1, EIF2AK1, SCYL2, MAPK4, RIPK2, MAPK9, RIPK4, CSNK1G3, NEK4, EIF2AK4, NEK7, FGFR2, NEK1, HUS1, BMPR2, STK17B, MAPKAPK3, PTK7, PXK, ATP6V1B2, UHMK1, EPHB2, LIF, IRAK3, ATP6V0E, PTK2, VRK3, SPNB2, TNKS, STK38L,…	1336	718	13588	1.699832	1.557013e-05	3.114045e-06	8.961621e-06
no Peak	protein amino acid phosphorylation	109	0.53428753	9.858270e-09	PRPF4B, STK38, TBK1, 4930444A02RIK, CASK, PRKG1, PRKX, MAP3K7, MAP3K4, AAK1, MAP3K9, B230120H23RIK, PRKACB, FRS2, INSR, MAP2K5, CSNK1G1, ROCK1, STK24, ROCK2, RPS6KC1, CDKL3, STK4, STK3, MAPK1, EIF2AK1, SCYL2, MAPK4, RIPK2, MAPK9, RIPK4, CSNK1G3, NEK4, EIF2AK4, NEK7, FGFR2, NEK1, HUS1, BMPR2, MAPKAPK3, STK17B, PTK7, PXK, UHMK1, EPHB2, LIF, IRAK3, PTK2, VRK3, SPNB2, TNKS, STK38L, FGD4, RYK, TAOK3, …	1336	640	13588	1.732190	3.100378e-05	5.167363e-06	1.784483e-05
no Peak	cell cycle	102	0.49997549	8.893069e-08	KIFC1, DBF4, KNTC1, WTAP, RCBTB1, ANKRD54, CASP8AP2, B230120H23RIK, STAG3, NUP37, DNAJC2, STAG2, CCAR1, STAG1, ANAPC1, PDPN, ANAPC4, RBL1, RINT1, SKP2, MND1, TACC1, AHR, MAPK1, UHRF2, MAPK4, CNTROB, PRDM5, NEK4, XRN1, SEPT7, BLCAP, NEK1, ANAPC10, SESN1, CCNG2, UHMK1, SESN3, CDC123, TFDP2, CLASP1, CLASP2, TCF3, CCPG1, CKAP5, NUF2, BRCA2, CDC27, BRCA1, NOTCH2, CDKN1B, SMC1A, CHAF1B, MAD1L1, CLSPN, …	1336	611	13588	1.697884	2.796479e-04	3.995449e-05	1.609767e-04
no Peak	response to DNA damage stimulus	57	0.27939807	3.918236e-07	CLSPN, XRCC2, INTS3, MLH3, XRCC1, FANCM, CASP3, CRY2, 2210018M11RIK, PARG, NSMCE2, CRY1, FANCA, RINT1, GTF2H5, RAD50, GTF2H2, MAPK1, PSEN1, PTPRV, FBXO18, HIPK2, RAD18, DMC1, REV3L, BLM, A730011L01RIK, NEK1, MGMT, HUS1, SHFM1, POLA1, PRKDC, CHD1L, ERCC6, ERCC3, ERCC4, APC, TRIP13, RAD51AP1, SHPRH, MSH3, MSH2, MSH5, BRCA2, WRN, RAD54L, UIMC1, BRCA1, SOD2, PTPN11, ATRX, UACA, TDP1, BRE, SMC1A, CHAF…	1336	287	13588	2.019957	1.231526e-03	1.540238e-04	7.092525e-04
no Peak	cellular macromolecule catabolic process	98	0.48036861	9.217684e-07	RNASEN, DZIP3, 1200011M11RIK, CUL3, CUL5, USP53, WWP1, LSM5, ITCH, FBXO21, ANAPC1, ANAPC4, SKP2, SOCS5, UBR1, BRAP, UHRF2, DCUN1D2, HUWE1, SIAH1B, FBXO18, FBXL5, RAD18, FBXL4, PIAS1, EIF2C3, FBXO10, DERL1, ANAPC10, PSMA8, LIN28B, PSMB7, UBE2D2, FBXO44, UBE2D1, TRAF6, FBXO8, SPOP, SHPRH, FBXO2, FOXRED2, HACE1, SUGT1, BRCA1, ATE1, UBE2E3, CBLB, TULP4, SMURF2, FBXO36, MAN1B1, SENP8, BNIP3, SENP6, AU…	1336	609	13588	1.636658	2.894765e-03	3.220551e-04	1.668515e-03
no Peak	intracellular transport	75	0.36762904	1.144055e-06	COPA, SEC24A, AP4E1, XPO5, HPS4, BNIP3, CASK, HOOK3, HOOK1, AP1S3, IMMP2L, AP2B1, ANKRD54, GOLGA7, CRY2, COPB1, TRAK1, TIMM9, RHOB, STAM, RANBP2, TPR, RAB27A, KIF5B, STX2, SNUPN, FLNA, KIF1C, NPC1, KIF1B, ATG4C, PSEN1, ATP2C1, ARCN1, PEX26, KPNA4, RAB13, KPNA3, ERC1, STEAP2, VPS26A, KPNA1, SPAST, MYO5A, PACS1, STON2, SNX9, STX7, DERL1, NUP160, NAPG, MTX2, STAM2, SNX2, LMAN1, STX12, SPNB2, CHM, SE…	1336	431	13588	1.769836	3.591589e-03	3.597407e-04	2.070877e-03
no Peak	protein catabolic process	91	0.44605657	1.152461e-06	DZIP3, BTRC, MAN1B1, SENP8, SENP6, CUL3, ZYG11B, USP53, CUL5, WWP1, MTBP, NSMCE2, RANBP2, ITCH, FBXO21, USP15, FBXL17, USP13, ANAPC1, FBXL20, ANAPC4, SKP2, GAN, UBR1, SOCS5, HERC1, BRAP, PJA2, SENP1, UHRF2, DCUN1D2, PSEN1, ATG4C, HUWE1, SIAH1B, FBXO18, FBXL5, KLHL13, RAD18, FBXL4, UBE2W, YME1L1, SIAH2, PIAS1, USP25, USP24, CLN8, FBXO10, UBE2T, DERL1, USP9X, ANAPC10, UBE3C, PSMA8, RNF125, PSMB7, U…	1336	556	13588	1.664622	3.617933e-03	3.294451e-04	2.086094e-03
no Peak	macromolecule catabolic process	103	0.50487721	1.308256e-06	RNASEN, DZIP3, BTRC, 1200011M11RIK, CUL3, CUL5, USP53, WWP1, LSM5, ITCH, FBXO21, ANAPC1, ANAPC4, SKP2, SOCS5, UBR1, BRAP, UHRF2, DCUN1D2, HUWE1, SIAH1B, FBXO18, FBXL5, RAD18, FBXL4, YME1L1, PIAS1, EIF2C3, FBXO10, DERL1, ANAPC10, PSMA8, LIN28B, PSMB7, UBE2D2, FBXO44, UBE2D1, TRAF6, FBXO8, SPOP, SHPRH, FBXO2, FOXRED2, HACE1, AFG3L2, SUGT1, BRCA1, ATE1, UBE2E3, CBLB, TULP4, SMURF2, FBXO36, MAN1B1, S…	1336	654	13588	1.601801	4.106014e-03	3.428135e-04	2.368097e-03
no Peak	cellular protein catabolic process	88	0.43135140	1.651951e-06	DZIP3, MAN1B1, SENP8, SENP6, CUL3, ZYG11B, USP53, CUL5, WWP1, MTBP, NSMCE2, RANBP2, ITCH, FBXO21, USP15, FBXL17, USP13, ANAPC1, FBXL20, ANAPC4, SKP2, GAN, UBR1, SOCS5, HERC1, BRAP, PJA2, SENP1, UHRF2, DCUN1D2, PSEN1, ATG4C, HUWE1, SIAH1B, FBXO18, FBXL5, KLHL13, RAD18, FBXL4, UBE2W, SIAH2, PIAS1, USP25, USP24, CLN8, FBXO10, UBE2T, DERL1, USP9X, ANAPC10, UBE3C, PSMA8, RNF125, PSMB7, UBE2D2, USP39, …	1336	537	13588	1.666700	5.181917e-03	3.995655e-04	2.990217e-03
no Peak	DNA repair	46	0.22547914	1.839332e-06	CLSPN, XRCC2, BLM, A730011L01RIK, MGMT, SHFM1, HUS1, POLA1, PRKDC, MLH3, INTS3, XRCC1, FANCM, CHD1L, CRY2, ERCC6, 2210018M11RIK, NSMCE2, CRY1, ERCC3, FANCA, ERCC4, TRIP13, SHPRH, RAD51AP1, MSH3, MSH2, MSH5, BRCA2, WRN, GTF2H5, RAD54L, BRCA1, RAD50, UIMC1, GTF2H2, SOD2, ATRX, TDP1, FBXO18, BRE, RAD18, DMC1, SMC1A, CHAF1B, REV3L	1336	222	13588	2.107434	5.768006e-03	4.131079e-04	3.329393e-03
no Peak	modification-dependent macromolecule catabolic process	84	0.41174452	2.054987e-06	DZIP3, MAN1B1, SENP8, SENP6, CUL3, ZYG11B, USP53, CUL5, WWP1, MTBP, NSMCE2, RANBP2, ITCH, FBXO21, USP15, FBXL17, USP13, ANAPC1, FBXL20, ANAPC4, SKP2, GAN, UBR1, SOCS5, HERC1, BRAP, PJA2, SENP1, UHRF2, DCUN1D2, ATG4C, HUWE1, SIAH1B, FBXO18, FBXL5, KLHL13, RAD18, FBXL4, UBE2W, SIAH2, PIAS1, USP25, USP24, FBXO10, UBE2T, DERL1, USP9X, ANAPC10, UBE3C, PSMA8, RNF125, UBE2D2, USP39, USP37, FBXO44, NEDD4…	1336	508	13588	1.681762	6.442100e-03	4.307699e-04	3.719745e-03
no Peak	modification-dependent protein catabolic process	84	0.41174452	2.054987e-06	DZIP3, MAN1B1, SENP8, SENP6, CUL3, ZYG11B, USP53, CUL5, WWP1, MTBP, NSMCE2, RANBP2, ITCH, FBXO21, USP15, FBXL17, USP13, ANAPC1, FBXL20, ANAPC4, SKP2, GAN, UBR1, SOCS5, HERC1, BRAP, PJA2, SENP1, UHRF2, DCUN1D2, ATG4C, HUWE1, SIAH1B, FBXO18, FBXL5, KLHL13, RAD18, FBXL4, UBE2W, SIAH2, PIAS1, USP25, USP24, FBXO10, UBE2T, DERL1, USP9X, ANAPC10, UBE3C, PSMA8, RNF125, UBE2D2, USP39, USP37, FBXO44, NEDD4…	1336	508	13588	1.681762	6.442100e-03	4.307699e-04	3.719745e-03
no Peak	proteolysis involved in cellular protein catabolic process	87	0.42644968	2.473202e-06	DZIP3, MAN1B1, SENP8, SENP6, CUL3, ZYG11B, USP53, CUL5, WWP1, MTBP, NSMCE2, RANBP2, ITCH, FBXO21, USP15, FBXL17, USP13, ANAPC1, FBXL20, ANAPC4, SKP2, GAN, UBR1, SOCS5, HERC1, BRAP, PJA2, SENP1, UHRF2, DCUN1D2, PSEN1, ATG4C, HUWE1, SIAH1B, FBXO18, FBXL5, KLHL13, RAD18, FBXL4, UBE2W, SIAH2, PIAS1, USP25, USP24, FBXO10, UBE2T, DERL1, USP9X, ANAPC10, UBE3C, PSMA8, RNF125, PSMB7, UBE2D2, USP39, USP37,…	1336	534	13588	1.657017	7.748057e-03	4.860212e-04	4.476743e-03
no Peak	cellular response to stress	70	0.34312044	3.224039e-06	C330019L16RIK, CLSPN, XRCC2, INTS3, MLH3, XRCC1, HNRPLL, FANCM, CASP3, CRY2, ATG5, 2210018M11RIK, COL4A3BP, NSMCE2, PARG, CAT, CRY1, FANCA, CLN3, RINT1, GTF2H5, GTF2H2, RAD50, MAPK1, PSEN1, PTPRV, FBXO18, HIPK2, RAD18, MAPK9, DMC1, EIF2AK4, REV3L, DERL1, BLM, A730011L01RIK, NEK1, MGMT, HUS1, SHFM1, POLA1, PRKDC, CHD1L, ERCC6, ERCC3, ERCC4, APC, FGD4, TRIP13, ANGPTL4, RAD51AP1, SHPRH, MSH3, MSH2, …	1336	404	13588	1.762243	1.008839e-02	5.962704e-04	5.835796e-03
no Peak	DNA metabolic process	72	0.35292388	3.671674e-06	CLSPN, XRCC2, DBF4, POT1A, BNIP3, INTS3, MLH3, XRCC1, FANCM, CASP3, CRY2, 2210018M11RIK, PRIM2, A630055G03RIK, NSMCE2, CRY1, DNAJC2, FANCA, TERT, RBMS1, SSBP1, AIFM1, MND1, PAPD5, GTF2H5, TOP1MT, MCM4, GTF2H2, RAD50, FBXO18, SMARCAL1, RAD18, DMC1, XRN1, REV3L, A730011L01RIK, BLM, 2610028A01RIK, MGMT, HUS1, SHFM1, POLA1, PRKDC, CHD1L, ERCC6, POLE2, ERCC3, ERCC4, BAZ2A, TCF3, TRIP13, TERF1, GINS1, …	1336	421	13588	1.739400	1.148102e-02	6.413186e-04	6.646030e-03
no Peak	mitotic cell cycle	47	0.23038086	1.085028e-05	KIFC1, MAD1L1, USP9X, DBF4, NEK1, CETN3, KNTC1, POLA1, ANAPC10, CCNG2, LATS1, CDC123, MTBP, BUB1, CLASP1, CAMK2B, NUP37, CLASP2, PPP3CA, MYB, TCF3, DNAJC2, STAG2, STAG1, APC, TERF1, ANAPC1, PDS5B, DSN1, CKAP5, ANAPC4, CCNF, NUF2, SKP2, KIF18A, CENPF, PAPD5, CDC27, CDC25B, 2610039C10RIK, RPS6KA2, NSL1, PRDM5, CIT, SMC1A, NEK4, SEPT7	1336	244	13588	1.959102	3.354865e-02	1.794405e-03	1.963868e-02
no Peak	cell cycle process	66	0.32351355	1.785839e-05	KIFC1, MAD1L1, DBF4, KNTC1, MLH3, LATS1, MTBP, STAG3, NUP37, MYB, DNAJC2, FANCA, STAG2, STAG1, ANAPC1, DSN1, ANAPC4, CCNF, SKP2, MND1, PAPD5, RAD50, FMN2, NSL1, CNTROB, NEK4, DMC1, XRN1, SEPT7, NEK1, USP9X, CETN3, POLA1, ANAPC10, CCNG2, SESN1, UHMK1, SESN3, CDC123, BUB1, CLASP1, CAMK2B, PPP3CA, CLASP2, TCF3, APC, TRIP13, TERF1, CSRP2BP, PDS5B, CKAP5, MSH2, MSH5, KIF18A, NUF2, CENPF, BRCA2, CDC27,…	1336	393	13588	1.708050	5.461700e-02	2.804318e-03	3.232122e-02
no Peak	cell cycle phase	57	0.27939807	2.692563e-05	KIFC1, MAD1L1, DBF4, KNTC1, MLH3, LATS1, MTBP, STAG3, NUP37, MYB, DNAJC2, FANCA, STAG2, STAG1, ANAPC1, DSN1, ANAPC4, CCNF, SKP2, MND1, PAPD5, RAD50, FMN2, NSL1, NEK4, DMC1, SEPT7, XRN1, USP9X, NEK1, POLA1, CETN3, ANAPC10, CCNG2, CDC123, BUB1, CLASP1, CAMK2B, PPP3CA, CLASP2, TCF3, APC, TRIP13, TERF1, PDS5B, CKAP5, MSH5, KIF18A, NUF2, CENPF, BRCA2, CDC27, CDC25B, 2610039C10RIK, RPS6KA2, CIT, SMC1A	1336	328	13588	1.767462	8.119581e-02	4.024369e-03	4.872790e-02
no Peak	enzyme linked receptor protein signaling pathway	49	0.24018430	4.661806e-05	SCHIP1, NDST1, FOXO1, PTEN, MAP3K7, TIAM1, PDGFC, FRS2, INSR, SGPL1, IRS2, SOCS5, FLNA, VEGFC, SS18, GRB10, DOK2, VEGFA, HIPK2, AKAP7, FGFR2, TWSG1, USP9X, TIPARP, PTK7, BMPR2, KIT, EPHB2, PHIP, PTK2, SORBS1, SOS1, SPNB2, PIK3R1, PTPN2, SMAD6, MYO1E, NLK, SMAD5, SMAD4, RAF1, SMAD1, PTPN11, EPHA4, HBEGF, BAMBI, LRP4, PLEKHA1, BMPR1A	1336	273	13588	1.825503	1.363755e-01	6.642261e-03	8.435150e-02
no Peak	transcription	221	1.08328023	7.934088e-05	MEF2A, HIRA, ASCC1, BBX, MXI1, EPC1, CRY2, BC031441, MED27, PHTF2, PRIM2, CREB3L2, CRY1, CCAR1, RREB1, HMG20A, MED14, PPARGC1B, ZFP74, ZFP81, MED16, PRDM5, PIAS1, MYBL1, PBRM1, SUPT7L, BCOR, TCF4, TCF3, PLAG1, KLF5, AEBP2, KLF13, SMAD6, SMAD5, ZFP449, ZBTB41, SMAD4, SMYD1, KLF15, SMAD1, ZSCAN2, ZFP748, C030039L03RIK, NOTCH2, SAP130, TRPS1, C230055K05RIK, ZIK1, CHAF1B, TCF12, NCOR1, ENY2, BACH1, P…	1336	1772	13588	1.268463	2.208385e-01	1.079079e-02	1.435206e-01
no Peak	ubiquitin-dependent protein catabolic process	30	0.14705162	9.158204e-05	DERL1, USP9X, MAN1B1, PSMA8, CUL3, CUL5, USP53, USP39, USP37, ITCH, UBE2D1, USP15, FBXO8, USP13, UBE4A, FBXO2, FOXRED2, SKP2, UBR1, ATE1, UHRF2, SIAH1B, USP47, USP46, SIAH2, CUL4B, TBL1X, USP25, USP24, USP45	1336	141	13588	2.163970	2.502674e-01	1.192988e-02	1.656464e-01
no Peak	cell division	49	0.24018430	9.759695e-05	MAD1L1, KIFC1, KNTC1, LATS1, EVI5, NUP37, STAG2, STAG1, ANAPC1, ROCK1, STX2, DSN1, ROCK2, CCNF, ANAPC4, PAPD5, CDK7, TACC1, ARL3, FMN2, NSL1, CNTROB, NEK4, SEPT7, SPAST, PARD3, USP9X, NEK1, CETN3, ANAPC10, CCNG2, CDC123, BUB1, AATF, CLASP1, CLASP2, TERF1, APC, CENPO, PDS5B, CKAP5, NUF2, BRCA2, DPPA3, CDC27, CDC25B, 2610039C10RIK, SMC1A, CIT	1336	281	13588	1.773531	2.643180e-01	1.220322e-02	1.765166e-01
no Peak	death	78	0.38233420	1.438382e-04	MEF2A, FASTKD2, CADM1, RBM5, BNIP3, NFKB1, SGMS1, GLI2, PTEN, CRADD, CTNNBL1, CASP3, CASP8AP2, PAK2, ANK2, RHOB, WWOX, NDUFS1, CCAR1, SGPL1, OPA1, ROCK1, AIFM1, ZFX, PIGT, GAN, BCL2L13, STK4, STK3, AHR, PURA, ELMO1, DAPK1, PSEN1, HIPK3, HIPK2, TNFAIP8, RIPK2, SIAH2, CLN8, BLCAP, DPF2, TNFRSF21, STK17B, TRIB3, PRKDC, KIT, IRAK3, MOAP1, TNFRSF1B, DOCK1, ECE1, SH3GLB1, DAD1, FAIM, TRAF6, BMF, PHLDA1…	1336	519	13588	1.528538	3.639027e-01	1.724964e-02	2.600471e-01
no Peak	cell death	76	0.37253076	1.918690e-04	MEF2A, FASTKD2, CADM1, RBM5, BNIP3, NFKB1, SGMS1, GLI2, PTEN, CRADD, CTNNBL1, CASP3, CASP8AP2, PAK2, ANK2, RHOB, WWOX, NDUFS1, CCAR1, SGPL1, OPA1, ROCK1, AIFM1, PIGT, GAN, BCL2L13, STK4, STK3, AHR, PURA, ELMO1, DAPK1, PSEN1, HIPK3, HIPK2, TNFAIP8, RIPK2, SIAH2, CLN8, BLCAP, DPF2, TNFRSF21, STK17B, TRIB3, PRKDC, KIT, IRAK3, MOAP1, TNFRSF1B, DOCK1, ECE1, SH3GLB1, DAD1, FAIM, TRAF6, BMF, PHLDA1, CFL…	1336	507	13588	1.524596	4.530981e-01	2.210339e-02	3.467402e-01
no Peak	transmembrane receptor protein tyrosine kinase signaling pathway	36	0.17646194	2.339253e-04	FGFR2, SCHIP1, NDST1, TIPARP, BMPR2, PTK7, FOXO1, KIT, PTEN, EPHB2, PHIP, PTK2, SORBS1, TIAM1, SOS1, PDGFC, INSR, FRS2, PIK3R1, SGPL1, IRS2, PTPN2, MYO1E, RAF1, SOCS5, FLNA, PTPN11, SS18, VEGFC, EPHA4, GRB10, DOK2, VEGFA, HBEGF, LRP4, PLEKHA1	1336	192	13588	1.906999	5.208689e-01	2.593564e-02	4.225912e-01
no Peak	intracellular signaling cascade	123	0.60291162	2.412382e-04	GNA13, ADCY1, STK38, IQGAP3, IQGAP2, ITSN1, IQGAP1, MAP3K7, DAB1, TIAM1, B230120H23RIK, RALB, RAB23, RAPGEF5, DEPDC1B, PRKACB, FRS2, RAB21, RAB27A, MAP2K5, ROCK1, ROCK2, RINT1, SOCS5, BRAP, STK3, PPARGC1B, DEPDC5, MAPK1, PTPRV, MED16, SDCBP, MAPK9, RAB15, PIAS1, RAB13, UNC13A, MRAS, HUS1, STK17B, AKAP13, RAB9, LIF, RHOBTB2, STK38L, FGD4, ABR, BRCA2, SMAD1, BRCA1, UIMC1, RAB33B, PTPN11, CBLB, TULP…	1336	915	13588	1.367203	5.317653e-01	2.582568e-02	4.357748e-01
no Peak	chromosome organization	63	0.30880839	2.519573e-04	ENY2, ARID4A, EZH1, ARID4B, EZH2, POT1A, HIRA, BNIP3, CBX2, MLH3, LATS1, HNRPLL, RCBTB1, EPC1, 2210018M11RIK, STAG3, METTL8, AIFM1, RBL1, HMG20A, BANP, HDAC11, UBN1, HUWE1, SMARCAL1, PRDM5, ASH1L, XRN1, EP400, BLM, 2610028A01RIK, PRKDC, CHD9, CHD1L, CHD7, PBRM1, CHD1, CHD6, BCOR, BAZ2A, TCF3, APC, TERF1, SETDB1, AEBP2, CSRP2BP, EHMT1, SHPRH, PDS5B, MSH5, SMYD3, KIF18A, BRCA2, SMYD1, WRN, RAD54L, …	1336	404	13588	1.586019	5.472909e-01	2.607098e-02	4.550963e-01
no Peak	M phase of mitotic cell cycle	36	0.17646194	2.872455e-04	KIFC1, MAD1L1, USP9X, NEK1, KNTC1, CETN3, ANAPC10, CCNG2, LATS1, BUB1, CLASP1, NUP37, CLASP2, STAG2, STAG1, APC, TERF1, ANAPC1, PDS5B, DSN1, CKAP5, ANAPC4, CCNF, NUF2, KIF18A, CENPF, PAPD5, CDC27, 2610039C10RIK, CDC25B, RPS6KA2, NSL1, CIT, SMC1A, NEK4, SEPT7	1336	194	13588	1.887339	5.948577e-01	2.872506e-02	5.186789e-01
no Peak	programmed cell death	71	0.34802216	3.065334e-04	MEF2A, FASTKD2, CADM1, RBM5, BNIP3, NFKB1, SGMS1, GLI2, PTEN, CRADD, CTNNBL1, CASP3, CASP8AP2, PAK2, ANK2, RHOB, NDUFS1, WWOX, CCAR1, SGPL1, OPA1, ROCK1, AIFM1, PIGT, BCL2L13, STK4, STK3, AHR, PURA, ELMO1, DAPK1, PSEN1, HIPK3, HIPK2, TNFAIP8, RIPK2, SIAH2, BLCAP, DPF2, TNFRSF21, STK17B, TRIB3, PRKDC, KIT, IRAK3, MOAP1, DOCK1, ECE1, SH3GLB1, DAD1, FAIM, TRAF6, BMF, PHLDA1, CFLAR, PDCD10, TM2D1, MS…	1336	473	13588	1.526674	6.187101e-01	2.968169e-02	5.534159e-01
no Peak	negative regulation of DNA metabolic process	9	0.04411548	3.633501e-04	CLSPN, GTPBP4, BLM, MSH2, HUS1, NDFIP1, RAD18, BRCA2, BCL6	1336	20	13588	4.576796	6.811210e-01	3.404174e-02	6.556744e-01
no Peak	organelle fission	36	0.17646194	3.876220e-04	KIFC1, MAD1L1, COX10, USP9X, NEK1, KNTC1, CETN3, ANAPC10, CCNG2, LATS1, BUB1, CLASP1, NUP37, CLASP2, STAG2, STAG1, APC, TERF1, ANAPC1, PDS5B, DSN1, CKAP5, ANAPC4, CCNF, NUF2, KIF18A, PAPD5, CDC27, 2610039C10RIK, CDC25B, RPS6KA2, NSL1, CIT, SMC1A, NEK4, SEPT7	1336	197	13588	1.858598	7.045653e-01	3.522656e-02	6.993287e-01
no Peak	mitosis	35	0.17156022	4.069780e-04	KIFC1, MAD1L1, USP9X, NEK1, KNTC1, CETN3, ANAPC10, LATS1, CCNG2, BUB1, CLASP1, NUP37, CLASP2, STAG2, STAG1, APC, TERF1, ANAPC1, PDS5B, DSN1, CKAP5, ANAPC4, CCNF, NUF2, KIF18A, PAPD5, CDC27, 2610039C10RIK, CDC25B, RPS6KA2, NSL1, CIT, SMC1A, NEK4, SEPT7	1336	190	13588	1.873542	7.220200e-01	3.591645e-02	7.341284e-01
no Peak	nuclear division	35	0.17156022	4.069780e-04	KIFC1, MAD1L1, USP9X, NEK1, KNTC1, CETN3, ANAPC10, LATS1, CCNG2, BUB1, CLASP1, NUP37, CLASP2, STAG2, STAG1, APC, TERF1, ANAPC1, PDS5B, DSN1, CKAP5, ANAPC4, CCNF, NUF2, KIF18A, PAPD5, CDC27, 2610039C10RIK, CDC25B, RPS6KA2, NSL1, CIT, SMC1A, NEK4, SEPT7	1336	190	13588	1.873542	7.220200e-01	3.591645e-02	7.341284e-01
no Peak	regulation of transcription	264	1.29405421	4.225745e-04	MEF2A, HIRA, ASCC1, BBX, MXI1, MAGED1, EPC1, CRY2, WWP1, MED27, TRAK1, PHTF2, BC031441, CREB3L2, YEATS2, TIGD3, CRY1, CCAR1, RREB1, HMG20A, MED14, PPARGC1B, ZFP74, MAPK1, ZFP81, MED16, SMARCAL1, PRDM5, VEGFA, PIAS1, MYBL1, LIF, PBRM1, SUPT7L, BCOR, TCF4, TCF3, PLAG1, KLF5, AEBP2, KLF13, SMAD6, SMAD5, SMAD4, ZBTB41, ZFP449, SMYD1, KLF15, SMAD1, SFMBT1, ZSCAN2, ABCG1, SFMBT2, ZFP748, C030039L03RIK,…	1336	2227	13588	1.205682	7.353316e-01	3.625099e-02	7.621606e-01
no Peak	M phase	47	0.23038086	4.305667e-04	KIFC1, MAD1L1, USP9X, NEK1, CETN3, KNTC1, ANAPC10, MLH3, CCNG2, LATS1, BUB1, STAG3, CLASP1, NUP37, CLASP2, FANCA, STAG2, STAG1, APC, TRIP13, TERF1, ANAPC1, PDS5B, DSN1, CKAP5, MSH5, ANAPC4, CCNF, NUF2, KIF18A, CENPF, MND1, BRCA2, PAPD5, CDC27, RAD50, CDC25B, 2610039C10RIK, FMN2, RPS6KA2, NSL1, CIT, DMC1, SMC1A, NEK4, SEPT7, XRN1	1336	283	13588	1.689120	7.419041e-01	3.594415e-02	7.765225e-01
no Peak	cellular protein localization	49	0.24018430	4.363349e-04	COPA, SEC24A, AP4E1, XPO5, HPS4, CASK, AP1S3, IMMP2L, AP2B1, CRY2, ANK2, COPB1, TRAK1, TIMM9, STAM, TPR, RAB27A, STX2, SNUPN, FLNA, ATG4C, PEX26, ARCN1, RAB13, KPNA4, KPNA3, KPNA1, STON2, PACS1, SNX9, STX7, DERL1, NAPG, MTX2, STAM2, SNX2, STX12, SH3GLB1, SPNB2, CHM, PEX13, PPP3CA, 1500001M20RIK, SEC61A2, IPO11, AP4S1, ERBB2IP, TOM1L2, SSR3	1336	299	13588	1.666763	7.465460e-01	3.547578e-02	7.868866e-01
no Peak	intracellular protein transport	46	0.22547914	4.620195e-04	STON2, PACS1, COPA, SNX9, STX7, SEC24A, DERL1, NAPG, AP4E1, XPO5, STAM2, MTX2, HPS4, SNX2, CASK, AP1S3, IMMP2L, AP2B1, STX12, CRY2, SPNB2, COPB1, TIMM9, TRAK1, CHM, PEX13, STAM, PPP3CA, 1500001M20RIK, TPR, SEC61A2, RAB27A, STX2, SNUPN, IPO11, AP4S1, ERBB2IP, ATG4C, TOM1L2, PEX26, ARCN1, RAB13, KPNA4, KPNA3, KPNA1, SSR3	1336	276	13588	1.695110	7.662229e-01	3.658049e-02	8.330233e-01
no Peak	cellular macromolecule localization	49	0.24018430	5.086279e-04	COPA, SEC24A, AP4E1, XPO5, HPS4, CASK, AP1S3, IMMP2L, AP2B1, CRY2, ANK2, COPB1, TRAK1, TIMM9, STAM, TPR, RAB27A, STX2, SNUPN, FLNA, ATG4C, PEX26, ARCN1, RAB13, KPNA4, KPNA3, KPNA1, STON2, PACS1, SNX9, STX7, DERL1, NAPG, MTX2, STAM2, SNX2, STX12, SH3GLB1, SPNB2, CHM, PEX13, PPP3CA, 1500001M20RIK, SEC61A2, IPO11, AP4S1, ERBB2IP, TOM1L2, SSR3	1336	301	13588	1.655689	7.981119e-01	3.921157e-02	9.166936e-01
no Peak	apoptosis	69	0.33821871	5.232141e-04	MEF2A, FASTKD2, CADM1, RBM5, BNIP3, NFKB1, SGMS1, GLI2, PTEN, CRADD, CTNNBL1, CASP3, CASP8AP2, PAK2, ANK2, RHOB, NDUFS1, WWOX, CCAR1, SGPL1, OPA1, ROCK1, AIFM1, PIGT, BCL2L13, STK4, STK3, AHR, PURA, ELMO1, DAPK1, PSEN1, HIPK3, HIPK2, TNFAIP8, RIPK2, SIAH2, BLCAP, DPF2, TNFRSF21, STK17B, TRIB3, PRKDC, IRAK3, MOAP1, DOCK1, ECE1, SH3GLB1, DAD1, FAIM, TRAF6, BMF, PHLDA1, CFLAR, PDCD10, TM2D1, MSH2, R…	1336	465	13588	1.509195	8.071686e-01	3.934972e-02	9.428646e-01

## Sheet: MouseCD4+CD8+
Peak Group	Term	Count	%	PValue	Genes	List.Total	Pop.Hits	Pop.Total	Fold.Enrichment	Bonferroni	Benjamini	FDR
RNAP II total no Ser5P	lymphocyte differentiation	7	0.4971590909090909	1.0727448546408915E-4	CARD11, SP3, BCL11B, LCK, BCL6, CBFB, RHOH	91	114	13588	9.168690958164643	0.09776634365318893	0.09776634365318893	0.16845309130792963
RNAP II total no Ser5P	leukocyte differentiation	7	0.4971590909090909	3.5498149367283816E-4	CARD11, SP3, BCL11B, LCK, BCL6, CBFB, RHOH	91	142	13588	7.360780065005417	0.2885767154648402	0.1565408815270536	0.5564127326415313
RNAP II total no Ser5P	positive regulation of lymphocyte activation	6	0.4261363636363636	3.934677349204914E-4	CARD11, CORO1A, LCK, IL4RA, BCL6, THY1	91	94	13588	9.530979658639232	0.3143649651177318	0.11821169663959064	0.6165631649987291
RNAP II total no Ser5P	positive regulation of leukocyte activation	6	0.4261363636363636	4.995745871253011E-4	CARD11, CORO1A, LCK, IL4RA, BCL6, THY1	91	99	13588	9.04961704961705	0.380728653721226	0.11290476508998315	0.7822219602126812
RNAP II total no Ser5P	positive regulation of cell activation	6	0.4261363636363636	5.475539593426189E-4	CARD11, CORO1A, LCK, IL4RA, BCL6, THY1	91	101	13588	8.87041671200087	0.4085913592281546	0.09972014337952684	0.8570445935656146
RNAP II total no Ser5P	regulation of T cell activation	6	0.4261363636363636	7.431328074387751E-4	CARD11, CORO1A, LCK, IL4RA, BCL6, THY1	91	108	13588	8.295482295482296	0.5097938665016541	0.11203375516735403	1.1614986188018261
RNAP II total no Ser5P	positive regulation of T cell activation	5	0.35511363636363635	9.482081818450401E-4	CARD11, CORO1A, LCK, IL4RA, THY1	91	66	13588	11.312021312021313	0.5973803813018052	0.12187484341060906	1.4797953326042057
RNAP II total no Ser5P	T cell differentiation	5	0.35511363636363635	0.001605237934426472	CARD11, SP3, BCL11B, LCK, RHOH	91	76	13588	9.823597455176403	0.7857603591019154	0.17517374031840982	2.493117168454484
RNAP II total no Ser5P	lymphocyte activation	7	0.4971590909090909	0.0016698227271549442	CARD11, SP3, BCL11B, LCK, BCL6, CBFB, RHOH	91	191	13588	5.472412404349577	0.7986475611418751	0.16312252809045813	2.5921962226978956
RNAP II total no Ser5P	positive regulation of immune system process	7	0.4971590909090909	0.0024433499265335847	CARD11, CORO1A, RELA, LCK, IL4RA, BCL6, THY1	91	206	13588	5.0739357729649	0.9042524124236269	0.20911601016078396	3.7715559283966527
RNAP II total no Ser5P	regulation of lymphocyte activation	6	0.4261363636363636	0.002662559881811273	CARD11, CORO1A, LCK, IL4RA, BCL6, THY1	91	144	13588	6.221611721611722	0.9224475080212449	0.20739983251344007	4.103335333387714
RNAP II total no Ser5P	leukocyte activation	7	0.4971590909090909	0.003309286401832307	CARD11, SP3, BCL11B, LCK, BCL6, CBFB, RHOH	91	219	13588	4.7727432384966635	0.9583672623443137	0.23272170282142968	5.075940286183844
RNAP II total no Ser5P	regulation of leukocyte activation	6	0.4261363636363636	0.0035539761199110684	CARD11, CORO1A, LCK, IL4RA, BCL6, THY1	91	154	13588	5.817610960468103	0.9671016880099379	0.23098212980737465	5.441512015450689
RNAP II total no Ser5P	cellular protein localization	8	0.5681818181818182	0.003664631966048983	STX6, SEC23A, YWHAZ, CSE1L, PEX5, RAMP1, YWHAE, WDR92	91	299	13588	3.995148664044985	0.9704253377523763	0.22235750453622816	5.606400977960069
RNAP II total no Ser5P	regulation of cell activation	6	0.4261363636363636	0.0037551808970901035	CARD11, CORO1A, LCK, IL4RA, BCL6, THY1	91	156	13588	5.743026204564666	0.972893915850602	0.2137914083081408	5.741128164943332
RNAP II total no Ser5P	cellular macromolecule localization	8	0.5681818181818182	0.0038009825004570565	STX6, SEC23A, YWHAZ, CSE1L, PEX5, RAMP1, YWHAE, WDR92	91	301	13588	3.968602825745683	0.9740630680870733	0.20407909325591966	5.809207489861712
RNAP II total no Ser5P	regulation of T cell differentiation	4	0.2840909090909091	0.003918812678126548	CARD11, LCK, IL4RA, BCL6	91	48	13588	12.443223443223445	0.9768445331913505	0.19868522698948166	5.984138281002183
RNAP II total no Ser5P	cell activation	7	0.4971590909090909	0.005815336775779455	CARD11, SP3, BCL11B, LCK, BCL6, CBFB, RHOH	91	246	13588	4.2489055659787365	0.9962768563834199	0.2670901746943031	8.758201884389806
RNAP II total no Ser5P	hemopoiesis	7	0.4971590909090909	0.00640004398952149	CARD11, SP3, BCL11B, LCK, BCL6, CBFB, RHOH	91	251	13588	4.1642660128715905	0.9978821777962674	0.2768017909647065	9.59787878713183
RNAP II total no Ser5P	regulation of lymphocyte differentiation	4	0.2840909090909091	0.006666876879208876	CARD11, LCK, IL4RA, BCL6	91	58	13588	10.29784009094354	0.9983630861085989	0.2743932874367443	9.978658488296599
RNAP II total no Ser5P	T cell activation	5	0.35511363636363635	0.007334542290041324	CARD11, SP3, BCL11B, LCK, RHOH	91	116	13588	6.436150056839712	0.9991410053213581	0.28550442025662304	10.924870042313284
RNAP II total no Ser5P	intracellular protein transport	7	0.4971590909090909	0.00998298118013496	STX6, SEC23A, YWHAZ, CSE1L, PEX5, RAMP1, YWHAE	91	276	13588	3.787068004459309	0.9999337308658796	0.3542571526322378	14.587253495488062
RNAP II total no Ser5P	protein localization	12	0.8522727272727272	0.010780678238395784	STX6, SEC23A, SFT2D2, YWHAZ, CSE1L, RAB14, PEX5, BCL6, RAMP1, YWHAE, NSF, WDR92	91	753	13588	2.379580578783766	0.9999694089528152	0.36361271596250355	15.662407060657701
RNAP II total no Ser5P	hemopoietic or lymphoid organ development	7	0.4971590909090909	0.010842790347789892	CARD11, SP3, BCL11B, LCK, BCL6, CBFB, RHOH	91	281	13588	3.7196824527785384	0.9999711966749923	0.3531402786067608	15.745589099782432
RNAP II total no Ser5P	immune system development	7	0.4971590909090909	0.013528797713720935	CARD11, SP3, BCL11B, LCK, BCL6, CBFB, RHOH	91	295	13588	3.5431551499348113	0.9999978769965983	0.4069681378070681	19.270141401003947
RNAP II total no Ser5P	proteasomal protein catabolic process	3	0.2130681818181818	0.01673282956887547	CUL3, RAD23B, EDEM1	91	30	13588	14.931868131868132	0.9999999062425105	0.4633482655774124	23.29382221815961
RNAP II total no Ser5P	proteasomal ubiquitin-dependent protein catabolic process	3	0.2130681818181818	0.01673282956887547	CUL3, RAD23B, EDEM1	91	30	13588	14.931868131868132	0.9999999062425105	0.4633482655774124	23.29382221815961
RNAP II total and Ser5P	T cell differentiation	3	0.9404389	0.006052105	CD3D, CD8A, CD3E	22	76	13588	24.380383	0.8331726	0.8331726	7.772534
RNAP II total and Ser5P	regulation of apoptosis	5	1.5673981	0.009351670	BTG2, CD3E, BTG1, DAD1, HSPA1A, HSPA1B	22	553	13588	5.584416	0.9374459	0.7498918	11.770845
RNAP II total and Ser5P	regulation of programmed cell death	5	1.5673981	0.009766282	BTG2, CD3E, BTG1, DAD1, HSPA1A, HSPA1B	22	560	13588	5.514610	0.9447128	0.6190440	12.261758
RNAP II total and Ser5P	regulation of cell death	5	1.5673981	0.009947629	BTG2, CD3E, BTG1, DAD1, HSPA1A, HSPA1B	22	563	13588	5.485225	0.9476207	0.5216014	12.475683
RNAP II total and Ser5P	mRNA metabolic process	4	1.2539185	0.010746478	ZFP36, ZFP36L2, RBM38, SFRS3	22	302	13588	8.180614	0.9587196	0.4713738	13.412310
RNAP II total and Ser5P	nuclear-transcribed mRNA catabolic process, deadenylation-dependent decay	2	0.6269592	0.012300330	ZFP36, ZFP36L2	22	8	13588	154.409091	0.9740374	0.4558424	15.207654
RNAP II total and Ser5P	lymphocyte differentiation	3	0.9404389	0.013204194	CD3D, CD8A, CD3E	22	114	13588	16.253589	0.9801824	0.4288874	16.236088
RNAP II total and Ser5P	T cell activation	3	0.9404389	0.013648348	CD3D, CD8A, CD3E	22	116	13588	15.973354	0.9826470	0.3975490	16.737216
RNAP II total and Ser5P	regulation of mRNA stability	2	0.6269592	0.019914718	ZFP36, ZFP36L2	22	13	13588	95.020979	0.9973525	0.4828114	23.518199
RNAP II total and Ser5P	leukocyte differentiation	3	0.9404389	0.019997931	CD3D, CD8A, CD3E	22	142	13588	13.048656	0.9974180	0.4489433	23.604704
RNAP II total and Ser5P	thymic T cell selection	2	0.6269592	0.022944793	CD3D, CD3E	22	15	13588	82.351515	0.9989380	0.4634024	26.610477
RNAP II total and Ser5P	regulation of RNA stability	2	0.6269592	0.024456482	ZFP36, ZFP36L2	22	16	13588	77.204545	0.9993274	0.4559401	28.109574
RNAP II total and Ser5P	positive regulation of calcium-mediated signaling	2	0.6269592	0.024456482	CD8A, CD3E	22	16	13588	77.204545	0.9993274	0.4559401	28.109574
RNAP II total and Ser5P	regulation of calcium-mediated signaling	2	0.6269592	0.027473181	CD8A, CD3E	22	18	13588	68.626263	0.9997302	0.4685541	31.016846
RNAP II total and Ser5P	T cell selection	2	0.6269592	0.031981576	CD3D, CD3E	22	21	13588	58.822511	0.9999315	0.4958639	35.159541
no Peak	RNA processing	131	0.4251452309090319	7.6042783019919615E-19	RNASEL, 2610101N10RIK, APOBEC1, RNMT, PRPF4B, LSM6, RBM3, SNRPD3, SNRPD1, SYNCRIP, WTAP, SART1, PNN, SMNDC1, PUS7L, SFRS7, IMP3, INTS4, CLP1, SFRS8, INTS7, U2AF1, SRRM1, TFB2M, RPP30, LSM4, LSM3, PTBP2, TGS1, IMP4, PABPN1, RRP9, SFRS1, MRM1, RCL1, AQR, RPS14, TRMT12, SNRPB, SLU7, SNRPA, SIP1, SNRPE, XRN1, 1110037F02RIK, XRN2, SNRPG, TDRD3, PPIL1, FARS2, CNOT6L, FRG1, CDC40, QTRTD1, ISY1, NPM3, PP…	1877	437	13588	2.1701068821784606	2.7436236113586996E-15	2.7436236113586996E-15	1.3974172688422674E-15
no Peak	cell cycle	158	0.5127705838444813	9.983858255921807E-16	MAEA, KNTC1, AURKB, PTTG1, WTAP, MLL5, OIP5, CDKN2C, INCENP, VPS4B, TLK2, STAG2, STAG1, CCAR1, ANAPC1, ZC3HC1, ANAPC5, RBL1, ANAPC4, SGOL1, 4632434I11RIK, PIM1, GPR132, UBR2, LIG4, TACC3, MYH9, PPP1CB, AHR, FOXN3, TACC1, TACC2, MAPK1, MAD2L1, PRDM9, UHRF2, MAPK6, ZWINT, CNTROB, STMN1, SEPT6, SEPT7, MCTS1, XRN1, SEPT9, CCDC99, NEK3, ANAPC13, MRE11A, NEK1, AHCTF1, NEDD9, CHEK1, ANAPC10, ANLN, RCC1,…	1877	611	13588	1.8720055944690095	3.6051162055628083E-12	1.8025581027814042E-12	1.8318679906315083E-12
no Peak	regulation of transcription	428	1.3890241131989745	6.275406325903737E-15	ASCC1, TCFAP4, MED22, MED21, CITED2, EPC1, EPC2, TAF5L, FLI1, PHTF2, MED27, A430033K04RIK, PHTF1, TIGD2, TIGD3, CCAR1, RREB1, RCOR1, ZHX2, MECP2, HMG20A, MED10, MAPK1, JUN, SMARCAL1, TGIF1, MCTS1, CRTC3, BC049349, NFKBIA, AHCTF1, MYBL1, 2610008E11RIK, HEXIM2, HEXIM1, LEO1, TCF4, ASXL2, DNMT3A, YEATS4, KLF10, ZSCAN2, SFMBT1, UPF3B, TRPS1, RERE, ELF1, TSG101, ELF4, EZH2, CREG1, SERTAD3, ANP32A, MYC…	1877	2227	13588	1.3912808824904985	2.283240263523112E-11	7.610800878410373E-12	1.1624035067825389E-11
no Peak	mRNA metabolic process	94	0.3050660435530458	1.1120245639759778E-14	RNASEL, APOBEC1, RNMT, PRPF4B, LSM6, SNRPD3, CWC15, SNRPD1, SYNCRIP, MLH1, WTAP, WBP4, 1200011M11RIK, SART1, PNN, RNGTT, AUH, SMNDC1, SFRS7, CLP1, WIBG, PRMT5, U2AF1, SRRM1, LSM4, DBR1, 1500002O20RIK, LSM3, PTBP2, ZCCHC8, PABPN1, SRPK2, BRF1, ZHX2, PRPF3, CDC5L, SFRS1, PRPF6, AQR, PAPD4, VEGFA, SNRPB, SNRPA, SLU7, RBMXRT, THOC5, SIP1, SNRPE, XRN2, 1110037F02RIK, SNRPG, PRPF38A, TDRD3, PPP4R2, PPI…	1877	302	13588	2.253264509027016	4.005684672847565E-11	1.0014211682118912E-11	2.0405899192610377E-11
no Peak	mRNA processing	83	0.26936682569045534	1.6072131355818311E-13	RNASEL, APOBEC1, RNMT, PRPF4B, LSM6, SNRPD3, CWC15, SNRPD1, SYNCRIP, MLH1, WTAP, WBP4, SART1, PNN, RNGTT, SMNDC1, SFRS7, CLP1, PRMT5, U2AF1, SRRM1, LSM4, DBR1, LSM3, PTBP2, ZCCHC8, PABPN1, SRPK2, PRPF3, CDC5L, SFRS1, PRPF6, AQR, PAPD4, SNRPB, SLU7, SNRPA, RBMXRT, THOC5, SIP1, SNRPE, XRN2, 1110037F02RIK, SNRPG, PRPF38A, TDRD3, PPP4R2, PPIL1, 0610009D07RIK, TRA2A, WBP11, SF3B5, SF3B2, SF3B1, CNOT6L…	1877	262	13588	2.2933379967220717	5.800231406283274E-10	1.1600465033012597E-10	2.954192446225079E-10
no Peak	transcription	349	1.1326388212767338	1.6097155666279848E-13	STAT5B, BBX, ASCC1, HIRA, MED22, MED21, CITED2, ZFP472, EPC1, TAF5L, EPC2, FLI1, PRIM2, A430033K04RIK, PHTF2, MED27, PHTF1, RARA, SAP30L, CRY1, SUPT5H, FIZ1, CCAR1, ZFP329, RREB1, RCOR1, MECP2, ZHX2, HMG20A, BC011426, MED10, ZFP74, ZFP82, ZFP81, PRDM9, ABT1, PARP14, JUN, TGIF1, PIAS1, MCTS1, SUV420H1, CRTC3, AHCTF1, ZNRD1, MYBL1, DIDO1, TCF20, 2610008E11RIK, HEXIM2, HEXIM1, LEO1, SUPT7L, ZFP810, …	1877	1772	13588	1.425781498981974	5.808242775628969E-10	9.680400925304866E-11	2.958300271416192E-10
no Peak	RNA splicing	68	0.22068607405965013	1.0749684019707632E-12	PRPF4B, LSM6, SNRPD3, CWC15, SNRPD1, SYNCRIP, WTAP, WBP4, SART1, SMNDC1, PNN, SFRS7, PRMT5, CLP1, U2AF1, SRRM1, LSM4, DBR1, LSM3, PTBP2, ZCCHC8, SRPK2, PRPF3, CDC5L, SFRS1, PRPF6, AQR, SNRPB, SLU7, SNRPA, RBMXRT, THOC5, SIP1, SNRPE, 1110037F02RIK, SNRPG, PRPF38A, TDRD3, PPP4R2, PPIL1, 0610009D07RIK, TRA2A, WBP11, SF3B5, SF3B1, FRG1, CDC40, DHX15, ISY1, PPIL3, HNRNPC, PABPC1, GEMIN6, SFRS14, PPWD1…	1877	201	13588	2.4490864802254046	3.878303900251012E-9	5.540433667405864E-10	1.9753421121038173E-9
no Peak	protein catabolic process	136	0.44137214811930026	9.948908208786195E-12	MKRN1, CAST, DZIP3, BTRC, CBX4, ZNRF2, CNOT4, WWP2, WWP1, FBXO28, RABGEF1, RBCK1, ITCH, ANAPC1, ZC3HC1, ANAPC5, DTL, ANAPC4, SOCS4, UBR2, MYH9, PSMA1, DCUN1D1, UHRF2, PSMA6, TRIM33, 1110018G07RIK, FBXO18, PSMA4, FBXL5, RAD18, YME1L1, ASB3, FBXL6, PIAS1, TNFAIP3, RNF20, FBXL3, DERL2, DERL1, ANAPC13, ANAPC10, RBX1, TRIM65, ARIH1, PSMB4, PSMB6, FBXW5, PSMB1, HECTD3, RNF168, FBXO42, FBXO3, TRAF6, FBX…	1877	556	13588	1.770742383184555	3.589574082418778E-8	4.4869676862902E-9	1.828287521377092E-8
no Peak	cell division	83	0.26936682569045534	9.957540769437443E-12	MAEA, CDC14A, TSG101, CCNT1, KNTC1, AURKB, PTTG1, TOP1, OIP5, INCENP, VPS4B, TOP2A, STAG2, STAG1, ANAPC1, CDC7, ARHGEF2, CCNK, KIF11, ZC3HC1, ANAPC5, ROCK1, SGOL1, ANAPC4, CCNF, NUSAP1, UBE2I, CDK7, LIG4, MYH9, PPP1CB, TACC1, MCM5, ARL3, MAD2L1, TIAL1, ZWINT, CNTROB, BUB1B, MAPRE2, SEPT6, SEPT7, SEPT9, CCDC99, NEK3, ANAPC13, NEK1, USP9X, CETN3, AHCTF1, CETN2, NEDD9, ANLN, ANAPC10, RCC1, CCNG1, CC…	1877	281	13588	2.13827243822485	3.5926985164635994E-8	3.991887265186733E-9	1.82987847097138E-8
no Peak	cell cycle process	105	0.3407652614156363	1.2868033043495685E-11	KNTC1, PTTG1, AURKB, MLL5, OIP5, INCENP, STAG2, STAG1, ANAPC1, ZC3HC1, ANAPC5, SGOL1, ANAPC4, 4632434I11RIK, GPR132, UBR2, MYH9, TACC3, TACC2, MAD2L1, PRDM9, ZWINT, CNTROB, STMN1, XRN1, SEPT7, CCDC99, NEK3, ANAPC13, NEK1, MRE11A, AHCTF1, NEDD9, CHEK1, ANLN, ANAPC10, CCNG1, RCC1, SESN1, CCNG2, SESN3, CDC123, NPM1, CLASP1, SKIL, ERCC6L, MKI67, MAP2K1, CKAP5, PCNT, NUF2, PMF1, CDC27, BRCA1, RNF8, NE…	1877	393	13588	1.9341404791631926	4.6427887090416675E-8	4.64278882006397E-9	2.3647239721924507E-8
no Peak	cellular macromolecule catabolic process	145	0.4705805990977834	1.6113255108098E-11	MKRN1, DZIP3, LSM6, CBX4, 1200011M11RIK, ZNRF2, CNOT4, WWP2, WIBG, WWP1, FBXO28, RABGEF1, RBCK1, ITCH, ANAPC1, ZC3HC1, ANAPC5, DTL, ANAPC4, ZHX2, SOCS4, UBR2, MYH9, PSMA1, DCUN1D1, UHRF2, PSMA6, TRIM33, 1110018G07RIK, FBXO18, PSMA4, FBXL5, RAD18, ASB3, FBXL6, PIAS1, TNFAIP3, RNF20, XRN2, FBXL3, DERL2, DERL1, ANAPC13, ANAPC10, RBX1, TRIM65, ARIH1, PSMB4, PSMB6, FBXW5, PSMB1, EIF3E, HECTD3, RNF168,…	1877	609	13588	1.7236217875535935	5.8136502834038595E-8	5.285136772670285E-9	2.9610824903159028E-8
no Peak	macromolecule catabolic process	153	0.49654366663421284	1.7315162461848434E-11	MKRN1, CAST, DZIP3, LSM6, BTRC, CBX4, 1200011M11RIK, ZNRF2, CNOT4, WWP2, WIBG, WWP1, FBXO28, RABGEF1, RBCK1, ITCH, ANAPC1, ZC3HC1, ANAPC5, DTL, ANAPC4, ZHX2, SOCS4, UBR2, MYH9, PSMA1, DCUN1D1, UHRF2, PSMA6, TRIM33, 1110018G07RIK, FBXO18, PSMA4, FBXL5, RAD18, YME1L1, ASB3, FBXL6, PIAS1, TNFAIP3, RNF20, XRN2, FBXL3, DERL2, DERL1, ANAPC13, ANAPC10, RBX1, TRIM65, ARIH1, PSMB4, PSMB6, FBXW5, PSMB1, EI…	1877	654	13588	1.6935770041008247	6.247305672779646E-8	5.206088227183159E-9	3.181956920172979E-8
no Peak	translation	90	0.2920845097848311	1.9332575033524757E-11	RPL19, VARS2, NARS, RPL13, F13A1, RBM3, RPL15, EIF5, RPS27L, EIF2A, MRPS30, RPS3, IGHMBP2, RPS3A, NARS2, RPLP1, MRPL36, EIF1, MRPL39, RPL12, EIF2B2, MRPL32, EIF2B4, EIF2B5, RPL36AL, MRPL1, CARS, EIF2S3Y, BRF1, DARS, SARS, MRPL9, EEF2, MRPS6, EIF1A, RPS4X, GTF2B, EARS2, EIF4G2, TARS, DHX29, MRPS9, RPS16, RPS17, RPS14, RPS12, RPS13, EEF1G, EIF2AK3, EIF4E3, MRPS16, FARS2, RPS15A, RPL39, IARS, QRSL1,…	1877	319	13588	2.0424107702045715	6.975178590273856E-8	5.365522137701362E-9	3.55268703344791E-8
no Peak	mitotic cell cycle	74	0.2401583747119722	3.830015542287919E-11	KNTC1, AURKB, PTTG1, OIP5, INCENP, MTBP, STAG2, STAG1, ANAPC1, ARHGEF2, CCNK, KIF11, ZC3HC1, ANAPC5, SGOL1, ANAPC4, CCNF, NUSAP1, GPR132, UBE2I, RBBP8, PPM1D, MAD2L1, ZWINT, MDM2, BUB1B, MAPRE2, STMN1, GADD45A, SEPT7, CCDC99, NEK3, ANAPC13, NEK1, USP9X, CETN3, AHCTF1, CETN2, NEDD9, CHEK1, ANLN, ANAPC10, RCC1, CCNG1, CCNG2, BCL2, CDC123, BUB1, CLASP1, BUB3, APC, ERCC6L, TERF1, PDS5B, PDS5A, MAP2K1…	1877	244	13588	2.1954985720149875	1.3818689859057542E-7	9.870493422603488E-9	7.038311045093337E-8
no Peak	proteolysis involved in cellular protein catabolic process	130	0.42189984746697823	4.2396566697152575E-11	MKRN1, DZIP3, CBX4, ZNRF2, CNOT4, WWP2, WWP1, FBXO28, RABGEF1, RBCK1, ITCH, ANAPC1, ZC3HC1, ANAPC5, DTL, ANAPC4, SOCS4, UBR2, MYH9, PSMA1, DCUN1D1, UHRF2, PSMA6, TRIM33, 1110018G07RIK, FBXO18, PSMA4, FBXL5, RAD18, ASB3, FBXL6, PIAS1, TNFAIP3, RNF20, FBXL3, DERL2, DERL1, ANAPC13, ANAPC10, RBX1, TRIM65, ARIH1, PSMB4, PSMB6, FBXW5, PSMB1, HECTD3, RNF168, FBXO42, FBXO3, TRAF6, FBXO9, FBXO45, FBXO8, H…	1877	534	13588	1.7623548614312028	1.5296667121855734E-7	1.01977788435903E-8	7.791093326048326E-8
no Peak	M phase of mitotic cell cycle	63	0.20445915684938176	5.648037304743213E-11	KNTC1, AURKB, PTTG1, OIP5, INCENP, STAG2, STAG1, ANAPC1, ARHGEF2, CCNK, KIF11, ZC3HC1, ANAPC5, SGOL1, ANAPC4, CCNF, NUSAP1, UBE2I, MAD2L1, ZWINT, BUB1B, MAPRE2, SEPT7, CCDC99, NEK3, ANAPC13, USP9X, NEK1, CETN3, AHCTF1, CETN2, NEDD9, ANLN, ANAPC10, RCC1, CCNG1, CCNG2, BUB1, CLASP1, BUB3, APC, ERCC6L, TERF1, PDS5B, PDS5A, MAP2K1, CKAP5, KIF18A, NUF2, CENPF, CENPE, BIRC5, PMF1, CEP63, CDC25C, CDC27,…	1877	194	13588	2.3508779638488706	2.037811756006036E-7	1.2736324661588583E-8	1.0379243020608442E-7
no Peak	cellular protein catabolic process	130	0.42189984746697823	6.376371931731719E-11	MKRN1, DZIP3, CBX4, ZNRF2, CNOT4, WWP2, WWP1, FBXO28, RABGEF1, RBCK1, ITCH, ANAPC1, ZC3HC1, ANAPC5, DTL, ANAPC4, SOCS4, UBR2, MYH9, PSMA1, DCUN1D1, UHRF2, PSMA6, TRIM33, 1110018G07RIK, FBXO18, PSMA4, FBXL5, RAD18, ASB3, FBXL6, PIAS1, TNFAIP3, RNF20, FBXL3, DERL2, DERL1, ANAPC13, ANAPC10, RBX1, TRIM65, ARIH1, PSMB4, PSMB6, FBXW5, PSMB1, HECTD3, RNF168, FBXO42, FBXO3, TRAF6, FBXO9, FBXO45, FBXO8, H…	1877	537	13588	1.7525093035461121	2.3005966309774806E-7	1.3532922782388823E-8	1.1717692371959743E-7
no Peak	mitosis	62	0.20121377340732807	6.527006573011633E-11	KNTC1, AURKB, PTTG1, OIP5, INCENP, STAG2, STAG1, ANAPC1, ARHGEF2, CCNK, KIF11, ZC3HC1, ANAPC5, SGOL1, ANAPC4, CCNF, NUSAP1, UBE2I, MAD2L1, ZWINT, BUB1B, MAPRE2, SEPT7, CCDC99, NEK3, ANAPC13, USP9X, NEK1, CETN3, AHCTF1, NEDD9, CETN2, ANAPC10, ANLN, RCC1, CCNG1, CCNG2, BUB1, CLASP1, BUB3, APC, ERCC6L, TERF1, PDS5B, PDS5A, MAP2K1, CKAP5, KIF18A, NUF2, CENPE, BIRC5, PMF1, CEP63, CDC25C, CDC27, CDC25A…	1877	190	13588	2.3622690183102937	2.3549417416113272E-7	1.3083011118908416E-8	1.1994489845790213E-7
no Peak	nuclear division	62	0.20121377340732807	6.527006573011633E-11	KNTC1, AURKB, PTTG1, OIP5, INCENP, STAG2, STAG1, ANAPC1, ARHGEF2, CCNK, KIF11, ZC3HC1, ANAPC5, SGOL1, ANAPC4, CCNF, NUSAP1, UBE2I, MAD2L1, ZWINT, BUB1B, MAPRE2, SEPT7, CCDC99, NEK3, ANAPC13, USP9X, NEK1, CETN3, AHCTF1, NEDD9, CETN2, ANAPC10, ANLN, RCC1, CCNG1, CCNG2, BUB1, CLASP1, BUB3, APC, ERCC6L, TERF1, PDS5B, PDS5A, MAP2K1, CKAP5, KIF18A, NUF2, CENPE, BIRC5, PMF1, CEP63, CDC25C, CDC27, CDC25A…	1877	190	13588	2.3622690183102937	2.3549417416113272E-7	1.3083011118908416E-8	1.1994489845790213E-7
no Peak	organelle fission	63	0.20445915684938176	1.1547992142111231E-10	COX10, KNTC1, AURKB, PTTG1, OIP5, INCENP, STAG2, STAG1, ANAPC1, ARHGEF2, CCNK, KIF11, ZC3HC1, ANAPC5, SGOL1, ANAPC4, CCNF, NUSAP1, UBE2I, MAD2L1, ZWINT, BUB1B, MAPRE2, SEPT7, CCDC99, NEK3, ANAPC13, USP9X, NEK1, CETN3, AHCTF1, CETN2, NEDD9, ANLN, ANAPC10, RCC1, CCNG1, CCNG2, BUB1, CLASP1, BUB3, APC, ERCC6L, TERF1, PDS5B, PDS5A, MAP2K1, CKAP5, KIF18A, NUF2, CENPE, BIRC5, PMF1, CEP63, CDC25C, CDC27,…	1877	197	13588	2.3150777918105625	4.166516049952662E-7	2.1929036142509517E-8	2.122143349936323E-7
no Peak	cell cycle phase	89	0.2888391263427774	2.336870119125133E-10	KNTC1, MLH1, AURKB, PTTG1, OIP5, INCENP, MTBP, RANBP1, STAG2, STAG1, ANAPC1, CCNK, ARHGEF2, KIF11, ZC3HC1, ANAPC5, SGOL1, ANAPC4, CCNF, TPX2, NUSAP1, UBE2I, UBR2, GPR132, MYH9, TACC3, RAD50, TACC2, RBBP8, PPM1D, MAD2L1, PRDM9, ZWINT, MDM2, BUB1B, MAPRE2, STMN1, GADD45A, XRN1, SEPT7, CCDC99, NEK3, ANAPC13, NEK1, USP9X, MRE11A, CETN3, AHCTF1, CETN2, NEDD9, CHEK1, ANLN, ANAPC10, RCC1, ZFP318, CCNG1,…	1877	328	13588	1.964298244474187	8.431421915089388E-7	4.215712645638803E-8	4.294400834936596E-7
no Peak	M phase	80	0.2596306753642943	2.5712810180594376E-10	KNTC1, MLH1, AURKB, PTTG1, OIP5, INCENP, RANBP1, STAG2, STAG1, ANAPC1, CCNK, ARHGEF2, KIF11, ZC3HC1, ANAPC5, SGOL1, ANAPC4, CCNF, TPX2, NUSAP1, UBE2I, UBR2, MYH9, TACC3, RAD50, TACC2, MAD2L1, PRDM9, ZWINT, BUB1B, MAPRE2, STMN1, XRN1, SEPT7, CCDC99, NEK3, ANAPC13, NEK1, USP9X, MRE11A, CETN3, AHCTF1, CETN2, NEDD9, ANLN, ANAPC10, RCC1, ZFP318, CCNG1, CCNG2, RPA1, BUB1, CLASP1, BUB3, APC, TERF1, ERCC…	1877	283	13588	2.0464202141979064	9.277177422939431E-7	4.4177054903116186E-8	4.7251721424501625E-7
no Peak	protein localization	166	0.5387336513809107	3.0315722142002767E-10	XPO1, GRPEL2, GRPEL1, APOBEC1, CHMP5, CHMP4B, XPO4, VPS52, VPS53, SRP19, TGFB1, HOOK1, VPS13D, TRAK1, VPS4B, RABGEF1, STAM, VPS13A, RAB21, SCAMP4, RAB27A, CD3G, VPS45, ERP29, MECP2, TMSB10, VPS41, TACC3, MYH9, NUPL1, CLPX, BCAP31, SEC61B, RAB18, RAB19, FGFR1OP, LYST, ERC1, VPS26A, AKAP2, PACS1, ARFGAP1, DERL2, CCDC99, AFTPH, DERL1, NAPG, SNX2, AKAP12, AHCTF1, SNX1, NFKBIA, SNX4, AKAP10, CCDC91, L…	1877	753	13588	1.595895232778706	1.0937904569852108E-6	4.971777400886168E-8	5.571035632812027E-7
no Peak	establishment of protein localization	148	0.4803167494239444	6.00156723464339E-10	XPO1, GRPEL2, GRPEL1, APOBEC1, CHMP5, CHMP4B, XPO4, VPS52, VPS53, SRP19, TGFB1, HOOK1, TRAK1, VPS4B, RABGEF1, VPS13A, STAM, RAB21, SCAMP4, RAB27A, CD3G, VPS45, ERP29, VPS41, MYH9, NUPL1, CLPX, BCAP31, SEC61B, RAB18, RAB19, LYST, ERC1, VPS26A, PACS1, ARFGAP1, DERL2, AFTPH, DERL1, NAPG, SNX2, AKAP12, AHCTF1, SNX1, NFKBIA, SNX4, CCDC91, LMAN2, SNX3, CHCHD4, TOMM7, SPNB2, TRAM1, SEC61A1, GABARAPL2, M…	1877	656	13588	1.633236742596515	2.1653630374318666E-6	9.414631652049366E-8	1.102891422632979E-6
no Peak	modification-dependent protein catabolic process	121	0.3926913964884951	9.172459426760782E-10	MKRN1, DZIP3, CBX4, ZNRF2, CNOT4, WWP2, WWP1, FBXO28, RABGEF1, RBCK1, ITCH, ANAPC1, ZC3HC1, ANAPC5, DTL, ANAPC4, UBR2, SOCS4, PSMA1, DCUN1D1, UHRF2, PSMA6, TRIM33, 1110018G07RIK, FBXO18, PSMA4, FBXL5, RAD18, ASB3, FBXL6, PIAS1, TNFAIP3, RNF20, FBXL3, DERL2, DERL1, ANAPC13, ANAPC10, RBX1, TRIM65, ARIH1, FBXW5, HECTD3, RNF168, FBXO42, FBXO3, TRAF6, FBXO9, FBXO45, FBXO8, HECTD1, SPOP, PCNP, MALT1, S…	1877	508	13588	1.724300378808536	3.309417898056388E-6	1.3789263109131866E-7	1.6855975837337667E-6
no Peak	modification-dependent macromolecule catabolic process	121	0.3926913964884951	9.172459426760782E-10	MKRN1, DZIP3, CBX4, ZNRF2, CNOT4, WWP2, WWP1, FBXO28, RABGEF1, RBCK1, ITCH, ANAPC1, ZC3HC1, ANAPC5, DTL, ANAPC4, UBR2, SOCS4, PSMA1, DCUN1D1, UHRF2, PSMA6, TRIM33, 1110018G07RIK, FBXO18, PSMA4, FBXL5, RAD18, ASB3, FBXL6, PIAS1, TNFAIP3, RNF20, FBXL3, DERL2, DERL1, ANAPC13, ANAPC10, RBX1, TRIM65, ARIH1, FBXW5, HECTD3, RNF168, FBXO42, FBXO3, TRAF6, FBXO9, FBXO45, FBXO8, HECTD1, SPOP, PCNP, MALT1, S…	1877	508	13588	1.724300378808536	3.309417898056388E-6	1.3789263109131866E-7	1.6855975837337667E-6
no Peak	chromatin modification	69	0.22393145750170385	1.0664695626779623E-9	MORF4L1, ENY2, UTY, MORF4L2, EZH2, HIRA, CBX4, CBX3, CTCF, CBX8, CBX7, EPC1, EPC2, MLL5, PRMT5, PRMT6, SETMAR, EED, TLK2, MYST2, MYST3, METTL8, BRCC3, RCOR1, RBL1, MECP2, HMG20A, TTF1, BANP, MBD3, PADI4, SUZ12, PRDM9, EYA2, EP300, SMARCE1, BPTF, SMARCAL1, ASH1L, SMARCA5, RNF20, SMARCA4, SUV420H1, UTP3, ING3, ING2, NR3C1, CHD1, RNF168, BCOR, MYSM1, TAF1, YEATS4, DNMT3A, CSRP2BP, SETDB2, EHMT1, CRE…	1877	236	13588	2.1165491272586077	3.847814841306807E-6	1.5391287788713015E-7	1.9598217382288396E-6
no Peak	protein transport	146	0.4738259825398371	1.2463468848940175E-9	XPO1, GRPEL2, GRPEL1, APOBEC1, CHMP5, CHMP4B, XPO4, VPS52, VPS53, SRP19, TGFB1, HOOK1, TRAK1, VPS4B, RABGEF1, VPS13A, STAM, RAB21, SCAMP4, RAB27A, CD3G, VPS45, ERP29, VPS41, MYH9, NUPL1, CLPX, BCAP31, SEC61B, RAB18, RAB19, LYST, ERC1, VPS26A, PACS1, ARFGAP1, DERL2, AFTPH, DERL1, NAPG, SNX2, AKAP12, AHCTF1, SNX1, NFKBIA, SNX4, CCDC91, LMAN2, SNX3, CHCHD4, TOMM7, SPNB2, TRAM1, SEC61A1, GABARAPL2, M…	1877	651	13588	1.6235405224698365	4.496809559828563E-6	1.729545877626748E-7	2.2903773544413752E-6
no Peak	chromosome organization	101	0.32778372764742153	1.7713773569677666E-9	MORF4L1, MORF4L2, CBX4, HIRA, CBX3, PTTG1, CBX8, CBX7, CBX5, EPC1, EPC2, MLL5, EED, TLK2, MYST2, MYST3, RCOR1, RBL1, MECP2, HMG20A, LIG4, TNKS2, SUZ12, EP300, PRDM9, MAD2L1, SMARCE1, SMARCAL1, SMARCA5, XRN1, SMARCA2, RNF20, SMARCA4, SUV420H1, CCDC99, BLM, CDYL2, RNF168, BCOR, TAF1, DNMT3A, YEATS4, SETDB2, EHMT1, CREBBP, WRN, UIMC1, RNF8, SMARCC1, DNMT1, NCOR1, HDAC8, RERE, ENY2, ARID4A, UTY, HP1B…	1877	404	13588	1.8098028769312733	6.391109162673381E-6	2.3670847515422366E-7	3.2552113449213493E-6
no Peak	cellular response to stress	98	0.3180475773212605	1.643053391268305E-8	XRCC5, MORF4L1, MORF4L2, PTTG1, SETX, EPC2, MYD88, ATG5, COL4A3BP, TLK2, CRY1, EIF2B5, 1110054O05RIK, POLI, POLH, DTL, NEIL3, LIG4, MAPK1, DCLRE1B, FBXO18, RAD18, MAPK9, NFE2L2, MCTS1, EIF2AK3, XRN2, DERL2, HMGB2, DERL1, BLM, NEK1, MRE11A, CHEK1, RRM2B, TTC5, RBX1, RNF168, POLQ, ANGPTL4, DHX9, BRIP1, WRN, BRCA1, UIMC1, PTPN11, ATP7A, RNF8, CLSPN, MLH1, PRDX3, POT1B, OS9, GPX1, CASP3, NSMCE1, PRMT…	1877	404	13588	1.7560463558343047	5.927960981322311E-5	2.117189434436284E-6	3.0193935129929628E-5
no Peak	response to DNA damage stimulus	76	0.24664914159607956	1.717932425772135E-8	MORF4L1, XRCC5, CLSPN, MORF4L2, MLH1, PTTG1, POT1B, SETX, EPC2, CASP3, NSMCE1, PRMT6, NSMCE2, TLK2, CRY1, FANCC, 1110054O05RIK, POLI, BRCC3, POLH, DTL, NEIL3, APTX, MBD4, TOPORS, GTF2H5, LIG4, RAD50, GTF2H1, XPA, MAPK1, DCLRE1B, EYA2, PSEN1, FBXO18, RAD18, GADD45A, MCTS1, NHEJ1, XRN2, REV3L, HMGB2, BLM, NEK1, MRE11A, WRNIP1, SHFM1, PML, CHEK1, RRM2B, TTC5, SMUG1, RBX1, RPA1, ERCC5, RNF168, ERCC3,…	1877	287	13588	1.9170037442059482	6.198108168742333E-5	2.1373426328796796E-6	3.1569966141287154E-5
no Peak	chromatin organization	81	0.26287605880634796	2.2782591727901136E-8	MORF4L1, ENY2, ARID4A, HP1BP3, UTY, ARID4B, MORF4L2, EZH2, CBX4, HIRA, CBX3, CTCF, CBX8, CBX7, CBX5, EPC1, EPC2, MLL5, PRMT5, SETMAR, PRMT6, EED, TLK2, MYST2, MYST3, METTL8, BRCC3, HIST1H1C, RCOR1, RBL1, MECP2, HMG20A, TTF1, BANP, MBD3, PADI4, MCM2, SUZ12, PRDM9, EYA2, EP300, SMARCE1, BPTF, ASH1L, SMARCAL1, SMARCA5, RNF20, SMARCA2, SMARCA4, SUV420H1, UTP3, ING3, ING2, NR3C1, TSPYL1, TSPYL3, CDYL,…	1877	315	13588	1.8615115305578813	8.219621350358253E-5	2.739982639443639E-6	4.186693267627106E-5
no Peak	DNA repair	61	0.1979683899652744	1.2867509436891094E-7	XRCC5, MORF4L1, CLSPN, MORF4L2, MLH1, PTTG1, SETX, EPC2, NSMCE1, PRMT6, NSMCE2, CRY1, FANCC, 1110054O05RIK, POLI, BRCC3, POLH, NEIL3, APTX, MBD4, GTF2H5, LIG4, RAD50, GTF2H1, XPA, EYA2, DCLRE1B, FBXO18, RAD18, NHEJ1, XRN2, REV3L, HMGB2, BLM, MRE11A, WRNIP1, SHFM1, CHEK1, RRM2B, TTC5, SMUG1, RBX1, RPA1, ERCC5, RNF168, ERCC3, POLQ, MSH3, MSH2, SMC5, BRIP1, WRN, BRCA1, SMC3, UIMC1, RNF8, ATRX, CUL4A…	1877	222	13588	1.9891527115821204	4.641520184194281E-4	1.4976009481415531E-5	2.364624107076274E-4
no Peak	ncRNA metabolic process	57	0.18498685619705968	1.332542620018743E-7	VARS2, NARS, UTP18, LSM6, F13A1, RG9MTD1, PUS7L, IMP3, INTS4, NARS2, INTS7, CLP1, TFB2M, RPP30, CDK5RAP1, FTSJ2, IMP4, CARS, DARS, SARS, EXOSC2, RRP9, EXOSC1, 1190005F20RIK, EARS2, TARS, RCL1, RPS14, TRMT12, TRUB1, TRUB2, DUS2L, C1D, FARS2, UTP6, NOB1, WBP11, FCF1, IARS, UTP11L, FRG1, TRDMT1, TYW1, QTRTD1, MARS2, NPM3, DUS3L, LCMT2, GARS, MPHOSPH10, LARS2, URM1, DDX56, POP4, UTP14A, DUS4L, TRIT1	1877	202	13588	2.0427478016848033	4.806658523160978E-4	1.502430617084105E-5	2.448774016672317E-4
no Peak	T cell activation	39	0.12656995424009346	1.4062507299259416E-7	BLM, ELF4, STAT5B, SOX4, ITPKB, ITGB2, CD1D1, TGFB1, CD1D2, CD48, DOCK2, CXCR4, BCL2, WWP1, PPP3CB, FAS, SPN, CD28, APC, RAB27A, EGR1, H2-M3, SMAD3, MALT1, LIG4, MYH9, WAS, IFNAR1, ATP7A, CBLB, PKNOX1, PSEN1, GADD45G, IRF1, RIPK2, HSPD1, H2-DMA, NCOR1, NHEJ1, LCP1	1877	116	13588	2.4338728344937812	5.07246606088696E-4	1.53748908708895E-5	2.584225058388512E-4
no Peak	DNA metabolic process	96	0.3115568104371531	5.167757186387413E-7	MORF4L1, XRCC5, CLSPN, MORF4L2, POT1A, MLH1, CTCF, PTTG1, POT1B, SETX, TOP1, EPC2, MLL5, CASP3, NSMCE1, PRIM2, PRMT6, NSMCE2, CRY1, MYST2, MYC, TOP2A, FANCC, ATF7IP, 1110054O05RIK, POLI, BRCC3, SSBP1, POLH, DTL, NEIL3, APTX, MBD4, MCM2, GTF2H5, LIG4, RMI1, MCM4, MCM5, RAD50, GTF2H1, MCM6, TNKS2, XPA, DCLRE1B, EYA2, FBXO18, RRM2, SMARCAL1, TOP3A, ORC5L, RAD18, XRN1, NHEJ1, XRN2, REV3L, HMGB2, BLM,…	1877	421	13588	1.6507465670822064	0.0018627901235473976	5.4837533858709264E-5	9.496602337399906E-4
no Peak	ribonucleoprotein complex biogenesis	42	0.1363061045662545	7.18262071838121E-7	TDRD3, SURF6, UTP18, LSM6, UTP6, NOB1, GNL3L, EIF2A, WBP11, FCF1, BMS1, SMNDC1, EIF3D, UTP11L, IMP3, FRG1, PRMT5, CLP1, NPM1, TFB2M, NPM3, AATF, PTBP2, GEMIN6, IMP4, FTSJ2, NMD3, SRPK2, MPHOSPH10, EXOSC2, IPO9, EXOSC1, ISG20L2, RRP9, RCL1, DDX56, RPS14, SLU7, POP4, SIP1, UTP14A, C1D	1877	137	13588	2.2193203162368897	0.0025881354731268624	7.403984422427179E-5	0.0013199221795878735
no Peak	leukocyte activation	57	0.18498685619705968	2.2810733845990434E-6	ELF4, STAT5B, MLH1, ITPKB, CD1D1, TPD52, TGFB1, CD1D2, CD48, MLL5, CXCR4, WWP1, FAS, IMPDH1, SPN, RAB27A, EGR1, LIG4, MYH9, PRKCD, WAS, IFNAR1, PSEN1, LAX1, IGBP1, GADD45G, RIPK2, NHEJ1, LCP1, BLM, SOX4, ITGB2, CD24A, DOCK2, BCL2, PPP3CB, POLM, NDRG1, TRAF6, PIK3R1, APC, CD28, FYB, H2-M3, MSH2, SWAP70, TGFBR2, SMAD3, MALT1, SLAMF1, ATP7A, LAT, CBLB, PKNOX1, IRF1, HSPD1, H2-DMA, NCOR1	1877	219	13588	1.884178337627079	0.008196347423358619	2.2858837409789334E-4	0.004191782623885754
no Peak	regulation of cell cycle	56	0.181741472755006	2.3682375703948175E-6	CLSPN, E2F2, XPO1, COPS5, BTRC, STAT5B, PTEN, TGFB1, CITED2, CASP3, MTBP, CDK5RAP3, RANBP1, CDK5RAP1, MYC, BRCC3, NUSAP1, TACC3, HRAS1, PURA, MAD2L1BP, MAD2L1, JUN, GADD45G, MDM2, GADD45B, ZFP369, GADD45A, SIPA1, PML, ANAPC10, CHEK1, CCNG2, SCRIB, HEXIM1, BCL2, NPM1, HECTD3, THAP1, AATF, APC, CD28, MSH2, GMNN, CENPF, CENPE, BIRC5, CEP63, UIMC1, PTPN11, ATF5, YWHAH, CDKN1B, MAPK14, BRE, 4933424B01…	1877	214	13588	1.8943731048252581	0.008508209833382407	2.3090877624165618E-4	0.004351955375825334
no Peak	apoptosis	101	0.32778372764742153	2.6638996773042106E-6	UBQLN1, CIAPIN1, CRADD, SMNDC1, TIA1, FAS, CCAR1, OPA1, ROCK1, 4632434I11RIK, TBRG4, FADD, LIG4, STK4, BCL2L11, AHR, DDIT4, BCAP31, TRIM35, TIAL1, TNFAIP8, RIPK2, TNFAIP3, BAT3, EIF2AK3, TRIM39, TRAF1, MCL1, STK17B, DIDO1, SCRIB, ECE1, 2610018G03RIK, TRP53BP2, FAIM, TRAF6, BMF, SRGN, ZFP346, CFLAR, MALT1, VDAC1, ATP7A, BFAR, TNFSF10, VCP, RHOT1, CYFIP2, PDCD7, DAP3, E2F2, SGPP1, PTEN, PDCD1, PDCD…	1877	465	13588	1.572387875871472	0.009565321315056496	2.5289861673971625E-4	0.004895261727810851
no Peak	covalent chromatin modification	32	0.10385227014571771	2.744112259957117E-6	MORF4L1, ING3, EZH2, CBX8, EPC1, MLL5, PRMT6, EED, RNF168, MYST2, MYSM1, MYST3, TAF1, YEATS4, METTL8, DNMT3A, CSRP2BP, EHMT1, BRCC3, CREBBP, MECP2, MBD3, UIMC1, SUZ12, RNF8, EYA2, EP300, PRDM9, PHF15, HDAC8, SUV420H1, SMARCA4	1877	96	13588	2.413070502575031	0.009851919343686455	2.538336920685502E-4	0.005042659254739235
no Peak	programmed cell death	102	0.3310291110894752	3.309145247894147E-6	UBQLN1, CIAPIN1, CRADD, SMNDC1, TIA1, FAS, CCAR1, OPA1, ROCK1, 4632434I11RIK, TBRG4, FADD, LIG4, STK4, BCL2L11, AHR, DDIT4, BCAP31, TRIM35, TIAL1, TNFAIP8, RIPK2, TNFAIP3, BAT3, EIF2AK3, TRIM39, TRAF1, MCL1, STK17B, DIDO1, SCRIB, ECE1, 2610018G03RIK, TRP53BP2, FAIM, TRAF6, BMF, SRGN, ZFP346, CFLAR, MALT1, VDAC1, ATP7A, BFAR, TNFSF10, VCP, RHOT1, CYFIP2, PDCD7, DAP3, E2F2, SGPP1, PTEN, PDCD1, PDCD…	1877	473	13588	1.5610984646679906	0.011868423799504924	2.9844085289576494E-4	0.00608095019813959
no Peak	lymphocyte activation	51	0.1655145555447376	3.829311150505765E-6	ELF4, STAT5B, MLH1, ITPKB, TPD52, CD1D1, TGFB1, CD1D2, CD48, CXCR4, WWP1, FAS, IMPDH1, SPN, RAB27A, EGR1, LIG4, MYH9, PRKCD, WAS, IFNAR1, PSEN1, LAX1, IGBP1, GADD45G, RIPK2, NHEJ1, LCP1, BLM, SOX4, ITGB2, CD24A, DOCK2, BCL2, PPP3CB, POLM, PIK3R1, CD28, APC, H2-M3, MSH2, SWAP70, SMAD3, MALT1, SLAMF1, ATP7A, CBLB, PKNOX1, IRF1, HSPD1, H2-DMA, NCOR1	1877	191	13588	1.9329831774553914	0.01372117569490483	3.3692325505352283E-4	0.007036785459080264
no Peak	ncRNA processing	44	0.14279687145036185	6.200529445818184E-6	UTP18, FARS2, LSM6, UTP6, RG9MTD1, NOB1, WBP11, FCF1, PUS7L, UTP11L, IMP3, FRG1, INTS4, TRDMT1, INTS7, CLP1, TYW1, QTRTD1, TFB2M, NPM3, RPP30, CDK5RAP1, IMP4, FTSJ2, DUS3L, LCMT2, EXOSC2, MPHOSPH10, RRP9, EXOSC1, 1190005F20RIK, URM1, RCL1, DDX56, RPS14, TRMT12, POP4, UTP14A, DUS4L, TRUB1, TRUB2, DUS2L, C1D, TRIT1	1877	158	13588	2.0159829515183807	0.022123191537191	5.325148207285801E-4	0.011393928266656417
no Peak	regulation of apoptosis	114	0.36997371239411936	7.718881741699096E-6	XRCC5, STAT5B, FOXO1, CIAPIN1, PNP, CRADD, TGFB1, CITED2, MAP3K7, ATG5, DNAJC5, FAS, SPN, CCAR1, RAB27A, PIK3CG, ZC3HC1, CD3G, ROCK1, PIM1, MECP2, FADD, LIG4, BCL2L11, HRAS1, TRIM35, VEGFA, RIPK2, MAPK9, BAT3, EIF2AK3, TRAF1, MCL1, STK17B, RRM2B, SCRIB, ZC3H8, 2610018G03RIK, TRP53BP2, GLO1, FAIM, SKIL, TRAF6, BMF, PTCRA, ANGPTL4, B4GALT1, PTPN6, CFLAR, TGFBR1, KLF10, NR4A1, MALT1, WRN, BRCA1, ATP…	1877	553	13588	1.4923510160590607	0.027465601404700557	6.474608371538348E-4	0.014183825017455298
no Peak	histone modification	30	0.09736150326161036	9.690723649178917E-6	MORF4L1, ING3, EZH2, CBX8, EPC1, MLL5, PRMT6, EED, RNF168, MYST2, MYSM1, MYST3, TAF1, YEATS4, METTL8, CSRP2BP, EHMT1, BRCC3, CREBBP, MECP2, MBD3, UIMC1, SUZ12, RNF8, EYA2, EP300, PRDM9, PHF15, HDAC8, SUV420H1	1877	92	13588	2.3606124481712256	0.03436011134329531	7.943275442892084E-4	0.017806876483994483
no Peak	methylation	27	0.08762535293544932	1.1664715920736001E-5	EZH2, CTCF, N6AMT2, MLL5, PRMT5, TRDMT1, PRMT6, EED, TFB2M, TGS1, FTSJ2, ATF7IP, ZCCHC4, DNMT3A, LCMT1, EHMT1, 4833442J19RIK, METTL4, LCMT2, MECP2, MBD4, ETF1, RNF8, SUZ12, PRDM9, DNMT1, SUV420H1	1877	79	13588	2.474160895045285	0.04121319691324998	9.348192396892996E-4	0.0214337546745047
no Peak	protein folding	37	0.1200791873559861	1.300890953154971E-5	GRPEL2, GRPEL1, FKBP7, FKBP5, PPIL1, FKBP4, TTC9C, DNAJC10, VBP1, CCT2, HSCB, SEC63, DNAJC18, SH3GLB1, SLMAP, PPIL4, SEP15, PPIL3, DNAJC5, HSPE1, PPWD1, HSPA9, DNAJA2, C80913, A830007P12RIK, UBE4B, NKTR, CLPX, PPIH, CCT4, DNAJB9, PPIA, HSPD1, DNAJB1, DNAJB4, H2-DMA, AHSA1	1877	127	13588	2.1090616203608543	0.04585196907491307	0.00101983724013599	0.02390341274299823
no Peak	regulation of programmed cell death	114	0.36997371239411936	1.3726615458177442E-5	XRCC5, STAT5B, FOXO1, CIAPIN1, PNP, CRADD, TGFB1, CITED2, MAP3K7, ATG5, DNAJC5, FAS, SPN, CCAR1, RAB27A, PIK3CG, ZC3HC1, CD3G, ROCK1, PIM1, MECP2, FADD, LIG4, BCL2L11, HRAS1, TRIM35, VEGFA, RIPK2, MAPK9, BAT3, EIF2AK3, TRAF1, MCL1, STK17B, RRM2B, SCRIB, ZC3H8, 2610018G03RIK, TRP53BP2, GLO1, FAIM, SKIL, TRAF6, BMF, PTCRA, ANGPTL4, B4GALT1, PTPN6, CFLAR, TGFBR1, KLF10, NR4A1, MALT1, WRN, BRCA1, ATP…	1877	560	13588	1.4736966283583226	0.048319555884565824	0.0010531890170747404	0.02522201481386377
no Peak	tRNA metabolic process	34	0.11034303702982506	1.496240506972384E-5	VARS2, NARS, FARS2, F13A1, LSM6, RG9MTD1, PUS7L, IARS, NARS2, TRDMT1, CLP1, TYW1, QTRTD1, RPP30, MARS2, CDK5RAP1, DUS3L, CARS, DARS, SARS, LCMT2, GARS, LARS2, 1190005F20RIK, EARS2, URM1, TARS, TRMT12, POP4, DUS4L, TRUB1, TRUB2, DUS2L, TRIT1	1877	113	13588	2.1781698341827713	0.05255345581466464	0.0011240503100474752	0.027492425330510883
no Peak	macromolecular complex subunit organization	81	0.26287605880634796	1.5736633150732005E-5	XPO1, MTSS1, TUBB2B, COX10, HP1BP3, SURF6, CAPZA2, LNX2, MLH1, EIF2A, SMNDC1, IGHMBP2, GTF2E1, PICALM, GTF2A1, CLP1, PRMT5, GOPC, FAS, PTBP2, TUBA1A, INSR, MYC, TUBA1B, TUBA1C, MYST3, SRPK2, ELP2, ATPAF2, BRF1, HIST1H1C, CCDC88C, TTF1, IPO9, IPO8, MCM2, MBD2, WAS, GTF2B, FLNA, STOM, TAF12, RRM2, RPS14, SLU7, ATPIF1, LAMC1, STMN1, SIP1, EIF2AK3, SMARCA2, XRN2, SMARCA4, TDRD3, FKBP4, PML, AHCTF1, T…	1877	367	13588	1.5977551284079905	0.055196414532815874	0.001158068087485642	0.028914823498182862
no Peak	regulation of cell death	114	0.36997371239411936	1.779930260889557E-5	XRCC5, STAT5B, FOXO1, CIAPIN1, PNP, CRADD, TGFB1, CITED2, MAP3K7, ATG5, DNAJC5, FAS, SPN, CCAR1, RAB27A, PIK3CG, ZC3HC1, CD3G, ROCK1, PIM1, MECP2, FADD, LIG4, BCL2L11, HRAS1, TRIM35, VEGFA, RIPK2, MAPK9, BAT3, EIF2AK3, TRAF1, MCL1, STK17B, RRM2B, SCRIB, ZC3H8, 2610018G03RIK, TRP53BP2, GLO1, FAIM, SKIL, TRAF6, BMF, PTCRA, ANGPTL4, B4GALT1, PTPN6, CFLAR, TGFBR1, KLF10, NR4A1, MALT1, WRN, BRCA1, ATP…	1877	563	13588	1.4658438932160933	0.062201765901712225	0.0012835846067461576	0.03270423002341705
no Peak	generation of precursor metabolites and energy	62	0.20121377340732807	1.8111969094508064E-5	LDHB, LDHA, ENOX2, COX10, UQCRFS1, OGDH, UQCRQ, NDUFS6, NDUFS5, GOT1, NDUFS4, FXN, ATP5O, CAT, NDUFS3, ATP5J, TXNL1, NDUFB11, ACO1, NDUFC2, MECP2, ATP6V1H, NDUFA13, CYB5B, NDUFA10, ATP6V1D, PPP1CB, NDUFA12, NDUFA11, ATP6V1C1, ATP6V1A, UQCRH, SLC37A2, ATP5C1, GNAS, MDH2, MDH1, UQCRB, ALDOA, NDUFB3, TXN2, ADPGK, HK1, TXN1, GPI1, ATP6V0E, PPP1R3B, CYB561D1, IDH1, FH1, ETFB, AGL, NDUFA4, NDUFA9, MSH2…	1877	261	13588	1.7196594386166888	0.06325911920014171	0.0012805240616281521	0.0332786293600118
no Peak	cell death	104	0.33751987797358257	2.483054482838616E-5	UBQLN1, CIAPIN1, TGFB1, CRADD, SMNDC1, TIA1, FAS, CCAR1, OPA1, ROCK1, 4632434I11RIK, TBRG4, FADD, LIG4, STK4, BCL2L11, AHR, DDIT4, BCAP31, TRIM35, TIAL1, TNFAIP8, RIPK2, TNFAIP3, BAT3, EIF2AK3, TRIM39, TRAF1, MCL1, STK17B, MMD, DIDO1, SCRIB, ECE1, 2610018G03RIK, TRP53BP2, FAIM, TRAF6, BMF, SRGN, ZFP346, CFLAR, MALT1, VDAC1, ATP7A, BFAR, TNFSF10, VCP, RHOT1, CYFIP2, PDCD7, DAP3, E2F2, SGPP1, PTEN,…	1877	507	13588	1.4849664631230959	0.08569376830598718	0.0017213958884279013	0.045620565166193394
no Peak	phosphorus metabolic process	162	0.5257521176126959	2.9473222242897216E-5	RNASEL, PRPF4B, STK38, CAPZA2, TTK, AURKB, TGFB1, PRKX, MAP3K7, PRKAR2B, CSNK2A1, AAK1, CLK4, PIK3C3, PRKACB, TLK2, FRS2, INSR, MAP2K6, MAP2K5, PIK3CG, ROCK1, CSNK1G1, PIM1, MECP2, PTPRS, RPS6KC1, CDKL3, MARK3, STK4, PPP1CB, MAPK1, CAMK4, MAPK6, RIOK3, SLC37A2, BMP2K, ATP5C1, RIPK2, MAPK9, CSNK1G3, EIF2AK3, NEK7, NEK3, FGR, NEK1, SSH2, DUSP10, STK17B, MAPKAPK3, CHEK1, DUSP11, RIOK2, GPD1L, IRAK4,…	1877	866	13588	1.354217395209544	0.10088196115229131	0.0020044215335415227	0.05414826105420989
no Peak	phosphate metabolic process	162	0.5257521176126959	2.9473222242897216E-5	RNASEL, PRPF4B, STK38, CAPZA2, TTK, AURKB, TGFB1, PRKX, MAP3K7, PRKAR2B, CSNK2A1, AAK1, CLK4, PIK3C3, PRKACB, TLK2, FRS2, INSR, MAP2K6, MAP2K5, PIK3CG, ROCK1, CSNK1G1, PIM1, MECP2, PTPRS, RPS6KC1, CDKL3, MARK3, STK4, PPP1CB, MAPK1, CAMK4, MAPK6, RIOK3, SLC37A2, BMP2K, ATP5C1, RIPK2, MAPK9, CSNK1G3, EIF2AK3, NEK7, NEK3, FGR, NEK1, SSH2, DUSP10, STK17B, MAPKAPK3, CHEK1, DUSP11, RIOK2, GPD1L, IRAK4,…	1877	866	13588	1.354217395209544	0.10088196115229131	0.0020044215335415227	0.05414826105420989
no Peak	negative regulation of macromolecule metabolic process	103	0.3342744945315289	3.805137790525606E-5	IMPACT, RBM3, CBX4, CBX3, MAF1, CBX8, TGFB1, CITED2, CBX5, EPC1, ATG5, WWP1, TIA1, SND1, CLP1, RARA, EIF2B5, MYST3, GABPA, RBL1, ZHX2, MECP2, TRAT1, SUZ12, JUN, SMARCA5, RAD18, TGIF1, EIF2AK3, SMARCA4, BLM, TXN1, ZC3H8, HEXIM1, NPM1, SKIL, TCF4, BCOR, DNMT3A, PTPN6, EHMT1, RFX5, SMAD3, SKI, FOXP4, UIMC1, TRPS1, DNMT1, HIVEP1, NCOR1, DNAJB6, CLSPN, TSG101, MLH1, CTCF, ZEB1, POT1B, CBFA2T2, SAP30, …	1877	506	13588	1.4735944373432501	0.12828433768426561	0.002539214866471684	0.06990285560001253
no Peak	regulation of T cell activation	32	0.10385227014571771	3.887088678854353E-5	BLM, STAT5B, IL4RA, ITPKB, ZEB1, CD1D1, CD24A, PNP, TGFB1, CD1D2, ZC3H8, CASP3, ITCH, CD5, SPN, PAG1, RC3H1, CD28, AP3B1, CLEC2I, PTPN6, SIT1, TGFBR2, CENPF, MALT1, LAT, PRKCQ, CBLB, IL20RB, CD274, RIPK2, HSPD1, H2-DMA	1877	108	13588	2.1449515578444722	0.1308581082064283	0.002546731297051963	0.07140783831371955
no Peak	protein ubiquitination	23	0.0746438191672346	4.3209447633028496E-5	AURKAIP1, UBE3A, UBE4B, BIRC6, PCNP, CBX8, RBX1, OS9, RNF8, SUZ12, UHRF2, TRIM33, KCMF1, NEDD4, WWP1, BCL2, MDM2, NSMCE2, RNF168, SIAH2, ITCH, HECTD1, RNF41	1877	66	13588	2.522755525419351	0.14435786370224957	0.0027801114435346275	0.07937500814403364
no Peak	cell activation	58	0.18823223963911334	4.365370041014631E-5	GNA13, ELF4, STAT5B, MLH1, ITPKB, CD1D1, TPD52, TGFB1, CD1D2, CD48, MLL5, CXCR4, WWP1, FAS, IMPDH1, SPN, RAB27A, EGR1, LIG4, MYH9, PRKCD, WAS, IFNAR1, PSEN1, LAX1, IGBP1, GADD45G, RIPK2, NHEJ1, LCP1, BLM, SOX4, ITGB2, CD24A, DOCK2, BCL2, PPP3CB, POLM, NDRG1, TRAF6, PIK3R1, APC, CD28, FYB, H2-M3, MSH2, SWAP70, TGFBR2, SMAD3, MALT1, SLAMF1, ATP7A, LAT, CBLB, PKNOX1, IRF1, HSPD1, H2-DMA, NCOR1	1877	246	13588	1.7068059652359975	0.14572830260968095	0.002759448667294717	0.08019078332045515
no Peak	intracellular transport	90	0.2920845097848311	4.7535389129697064E-5	GRPEL2, XPO1, GRPEL1, SPG7, CHMP5, TIMM17B, AP3S2, AP3S1, SRP19, TGFB1, PEX7, HOOK1, GOLGA7, COPB1, TRAK1, VPS4B, RANBP1, STAM, AP3B1, RAB27A, ADAM10, KIF5B, SNUPN, IPO9, VPS41, IPO8, MYH9, WAS, FLNA, BCAP31, KIF1C, MFN2, NPC2, NDEL1, CAMK4, PSEN1, SLC37A2, KPNA4, ERC1, VPS26A, SRP9, PACS1, NXT1, AP1M1, DERL2, DERL1, NUP160, NAPG, STX4A, AKAP12, BET1, PML, SNX2, DSCR3, NFKBIA, SNX1, MYO9B, POLA2,…	1877	431	13588	1.5116682962767014	0.15760963892917257	0.0029527314064501375	0.0873184062490373
no Peak	macromolecular complex assembly	74	0.2401583747119722	5.0209219957571966E-5	XPO1, MTSS1, TUBB2B, COX10, HP1BP3, SURF6, CAPZA2, LNX2, MLH1, EIF2A, SMNDC1, IGHMBP2, GTF2E1, PICALM, GTF2A1, CLP1, PRMT5, GOPC, FAS, PTBP2, TUBA1A, INSR, MYC, TUBA1B, TUBA1C, MYST3, SRPK2, ELP2, ATPAF2, BRF1, HIST1H1C, CCDC88C, TTF1, IPO9, IPO8, MCM2, MBD2, WAS, GTF2B, FLNA, STOM, TAF12, RRM2, RPS14, SLU7, ATPIF1, LAMC1, SIP1, EIF2AK3, SMARCA2, SMARCA4, TDRD3, FKBP4, PML, AHCTF1, TSPYL1, EIF3D,…	1877	338	13588	1.5849161289102278	0.16569765103113776	0.0030657893757061183	0.0922278603000537
no Peak	nuclear mRNA splicing, via spliceosome	16	0.051926135072858856	5.566266476887649E-5	SRPK2, TDRD3, CWC15, SMNDC1, PRPF6, SF3B1, RSRC1, PRMT5, DBR1, SLU7, SRRM1, LSM3, PTBP2, PHF5A, GEMIN6, SIP1	1877	37	13588	3.1304698411784186	0.1819538158113443	0.003341678856061625	0.10224029110698085
no Peak	RNA splicing, via transesterification reactions with bulged adenosine as nucleophile	16	0.051926135072858856	5.566266476887649E-5	SRPK2, TDRD3, CWC15, SMNDC1, PRPF6, SF3B1, RSRC1, PRMT5, DBR1, SLU7, SRRM1, LSM3, PTBP2, PHF5A, GEMIN6, SIP1	1877	37	13588	3.1304698411784186	0.1819538158113443	0.003341678856061625	0.10224029110698085
no Peak	RNA splicing, via transesterification reactions	16	0.051926135072858856	5.566266476887649E-5	SRPK2, TDRD3, CWC15, SMNDC1, PRPF6, SF3B1, RSRC1, PRMT5, DBR1, SLU7, SRRM1, LSM3, PTBP2, PHF5A, GEMIN6, SIP1	1877	37	13588	3.1304698411784186	0.1819538158113443	0.003341678856061625	0.10224029110698085
no Peak	organelle localization	20	0.06490766884107357	6.14245457882183E-5	CCDC99, KIF18A, CENPF, MLH1, NUSAP1, BIRC5, MYH9, TACC3, TACC1, SCRIB, TACC2, MFN2, SYNE1, NDEL1, PSEN1, NPM1, RHOT1, PEX13, NMD3, RAB27A	1877	54	13588	2.68118944730559	0.19878549233078724	0.0036266302584901933	0.11281797465643173
no Peak	death	104	0.33751987797358257	6.560149225191643E-5	UBQLN1, CIAPIN1, TGFB1, CRADD, SMNDC1, TIA1, FAS, CCAR1, OPA1, ROCK1, 4632434I11RIK, TBRG4, FADD, LIG4, STK4, BCL2L11, AHR, DDIT4, BCAP31, TRIM35, TIAL1, TNFAIP8, RIPK2, TNFAIP3, BAT3, EIF2AK3, TRIM39, TRAF1, MCL1, STK17B, MMD, DIDO1, SCRIB, ECE1, 2610018G03RIK, TRP53BP2, FAIM, TRAF6, BMF, SRGN, ZFP346, CFLAR, MALT1, VDAC1, ATP7A, BFAR, TNFSF10, VCP, RHOT1, CYFIP2, PDCD7, DAP3, E2F2, SGPP1, PTEN,…	1877	519	13588	1.4506319784266084	0.21077035958944612	0.0038104306532479315	0.120485367028067
no Peak	microtubule cytoskeleton organization	32	0.10385227014571771	6.903678921132862E-5	CCDC99, CAPZA2, MLH1, HOOK1, TUBGCP6, TUBGCP5, NPM1, RANBP1, TUBA1B, KIF11, CKAP5, PCNT, NUF2, KIF18A, TPX2, NUSAP1, BIRC5, CENPE, MYH9, CEP63, TACC3, TACC1, SMC3, BRCA1, TACC2, NEDD1, NDEL1, FGFR1OP, CNTROB, STMN1, GADD45A, RANBP10	1877	111	13588	2.0869798941189455	0.22049278443996734	0.003946056219992	0.1267909368538156
no Peak	hemopoiesis	58	0.18823223963911334	7.9025557082362E-5	XRCC5, MAEA, G6PDX, STAT5B, ITPKB, PRDX3, CD1D1, TPD52, CIAPIN1, TGFB1, CD1D2, MLL5, PICALM, WWP1, CASP8, FAS, SPN, MYST3, EGR1, OSTM1, LIG4, MYH9, TACC3, PSEN1, GADD45G, VEGFA, NHEJ1, BLM, TIPARP, PML, SOX4, AHCTF1, TTC7, CD24A, RPA1, DOCK2, BCL2, POLM, PPP3CB, DYRK3, RUNX1, TRAF6, PIK3R1, APC, CD28, EBP, MSH2, TGFBR2, SMAD5, BPGM, MALT1, ATP7A, PKNOX1, SP1, ID2, IRF1, JAK2, H2-DMA, NCOR1	1877	251	13588	1.6728058464065951	0.24808761911150023	0.0044453319543907854	0.1451234210259167
no Peak	translational initiation	16	0.051926135072858856	8.030389534854524E-5	EIF4E3, BRF1, EIF5, EIF1A, GTF2B, EIF3C, EIF3D, EIF4E, EIF3B, EIF3E, EIF3F, EIF1, EIF2B2, EIF2B4, EIF4E2, EIF2B5	1877	38	13588	3.0480890558842497	0.2515479124969726	0.004447742267511212	0.1474693381715464
no Peak	ribosome biogenesis	32	0.10385227014571771	8.30276907012385E-5	SURF6, UTP18, LSM6, UTP6, NOB1, GNL3L, WBP11, EIF2A, FCF1, BMS1, UTP11L, IMP3, FRG1, NPM1, NPM3, TFB2M, AATF, IMP4, FTSJ2, NMD3, MPHOSPH10, EXOSC2, IPO9, EXOSC1, ISG20L2, RRP9, RCL1, DDX56, RPS14, POP4, UTP14A, C1D	1877	112	13588	2.068346145064312	0.2588678613262896	0.004528749673838428	0.15246768343647465
no Peak	chromosome segregation	22	0.07139843572518093	8.309317101646584E-5	CCDC99, PDS5B, USP9X, SGOL1, NUF2, KIF18A, CENPF, MLH1, NUSAP1, UBE2I, CTCF, BIRC5, CENPE, PMF1, PTTG1, MIS12, MAD2L1, INCENP, TOP2A, STAG2, BUB3, STAG1	1877	64	13588	2.4884789557805007	0.2590429498603184	0.00446481811670163	0.15258784124907443
no Peak	protein modification by small protein conjugation	25	0.08113458605134197	1.0667739072361928E-4	AURKAIP1, UBE3A, CBX8, RBX1, OS9, SUMO1, BCL2, WWP1, NSMCE2, RNF168, ITCH, HECTD1, UBE4B, BIRC6, UBE2F, PCNP, RNF8, SUZ12, UHRF2, TRIM33, KCMF1, NEDD4, MDM2, SIAH2, RNF41	1877	79	13588	2.2908897176345233	0.3194898604327179	0.005644488452100416	0.1958565087772035
no Peak	protein modification by small protein conjugation or removal	30	0.09736150326161036	1.2037192667964981E-4	AURKAIP1, UBE3A, USP9X, CBX8, RBX1, OS9, SUMO1, BCL2, WWP1, NSMCE2, RNF168, ITCH, MYSM1, HECTD1, BRCC3, UBE4B, BIRC6, UBE2F, PCNP, UIMC1, SUZ12, RNF8, SENP1, UHRF2, KCMF1, TRIM33, NEDD4, MDM2, SIAH2, RNF41	1877	104	13588	2.088234088766854	0.3523002588491999	0.00627483990379496	0.22097298153389566
no Peak	immune system development	65	0.21094992373348911	1.2453246894654545E-4	XRCC5, MAEA, G6PDX, STAT5B, MLH1, ITPKB, PRDX3, CD1D1, TPD52, CIAPIN1, TGFB1, CD1D2, MLL5, PICALM, WWP1, CASP8, FAS, SPN, MYST3, EGR1, OSTM1, LIG4, MYH9, TACC3, BCL2L11, PSEN1, GADD45G, VEGFA, NHEJ1, BLM, TIPARP, PML, SOX4, AHCTF1, TTC7, CD24A, RPA1, DOCK2, BCL2, POLM, PPP3CB, DYRK3, RUNX1, TRAF6, PIK3R1, APC, CD28, EBP, MSH3, MSH2, SWAP70, TGFBR1, TGFBR2, SMAD5, SMAD3, BPGM, MALT1, ATP7A, PKNOX1…	1877	295	13588	1.5950805017021394	0.36195159417714495	0.006398600174385316	0.22860244302304045
no Peak	protein complex assembly	53	0.17200532242884495	1.2635218747331718E-4	MTSS1, XPO1, TUBB2B, COX10, CAPZA2, LNX2, MLH1, IGHMBP2, GTF2E1, PICALM, GTF2A1, GOPC, FAS, TUBA1A, INSR, TUBA1B, MYC, TUBA1C, ELP2, ATPAF2, BRF1, CCDC88C, TTF1, IPO9, IPO8, MBD2, GTF2B, WAS, FLNA, STOM, TAF12, RRM2, ATPIF1, LAMC1, EIF2AK3, FKBP4, PML, AHCTF1, TFAM, NPM1, TUBE1, PEX13, TNPO1, APC, SCO1, CLEC2I, TAF1, TRIM24, ANXA5, MIS12, GTF2F1, TUBD1, H2-DMA	1877	227	13588	1.6902123784556387	0.36612752953538763	0.0064006602743765795	0.23193920782236255
no Peak	protein complex biogenesis	53	0.17200532242884495	1.2635218747331718E-4	MTSS1, XPO1, TUBB2B, COX10, CAPZA2, LNX2, MLH1, IGHMBP2, GTF2E1, PICALM, GTF2A1, GOPC, FAS, TUBA1A, INSR, TUBA1B, MYC, TUBA1C, ELP2, ATPAF2, BRF1, CCDC88C, TTF1, IPO9, IPO8, MBD2, GTF2B, WAS, FLNA, STOM, TAF12, RRM2, ATPIF1, LAMC1, EIF2AK3, FKBP4, PML, AHCTF1, TFAM, NPM1, TUBE1, PEX13, TNPO1, APC, SCO1, CLEC2I, TAF1, TRIM24, ANXA5, MIS12, GTF2F1, TUBD1, H2-DMA	1877	227	13588	1.6902123784556387	0.36612752953538763	0.0064006602743765795	0.23193920782236255
no Peak	microtubule-based process	50	0.16226917210268393	1.3746105920439957E-4	KIF23, SPG7, TUBB2B, CAPZA2, MLH1, HOOK1, KIF2C, RANBP1, TUBA1A, TUBA1B, TUBA1C, KIF11, KIF5B, TPX2, NUSAP1, KIF16B, TACC3, MYH9, BICD2, TACC1, TACC2, KIF1C, NDEL1, LYST, FGFR1OP, CNTROB, STMN1, GADD45A, DYNLRB1, XRN2, CCDC99, TUBGCP6, TUBGCP5, NPM1, TUBE1, PEX13, CKAP5, PCNT, NUF2, KIF18A, CENPE, BIRC5, CEP63, SMC3, BRCA1, NEDD1, TUBD1, RHOT1, RANBP10, ACTR10	1877	211	13588	1.7154529639158986	0.39103445686677074	0.006865126502582863	0.25230693371304236
no Peak	nitrogen compound biosynthetic process	66	0.21419530717554278	1.410773827986471E-4	ATP1B3, CTPS, COX10, DTYMK, ATP10A, G6PDX, CAD, PSPH, PNP, GOT2, TPK1, MTHFD1, GOT1, GATA3, ATP8B2, ATP5O, IMPDH1, ATP5J, QDPR, ATP6V1H, PADI4, ATP6V1D, GMPS, ATP6V1C1, ATP6V1A, PYCR2, GLUL, UMPS, RRM2, ADK, ATP5C1, PRPS2, PRPS1, ALDH18A1, BCAT2, UROS, NFS1, CTPS2, RRM2B, TYMS, ATP6V0E, MTHFR, GPHN, QTRTD1, DHODH, PAPSS1, AMD2, ODC1, ADAL, ATP5F1, ATP1A1, ATP11C, PRPSAP2, GART, AMPD1, ATP7A, ADI1…	1877	302	13588	1.5820793361253516	0.3989295350919403	0.006948936924318305	0.2589364875764444
no Peak	biopolymer methylation	23	0.0746438191672346	1.4802525857590513E-4	ATF7IP, LCMT1, DNMT3A, EHMT1, 4833442J19RIK, LCMT2, EZH2, MECP2, MBD4, CTCF, ETF1, SUZ12, MLL5, PRDM9, PRMT5, TRDMT1, PRMT6, EED, TFB2M, DNMT1, TGS1, FTSJ2, SUV420H1	1877	71	13588	2.3450966856010864	0.41381196682414934	0.007191780230771605	0.27167237454820414
no Peak	one-carbon metabolic process	32	0.10385227014571771	1.9896373866826552E-4	AHCY, PPME1, EZH2, CTCF, N6AMT2, MTHFD1, MLL5, TRDMT1, PRMT5, PRMT6, EED, TFB2M, TGS1, FTSJ2, ATF7IP, ZCCHC4, LCMT1, DNMT3A, EHMT1, 4833442J19RIK, METTL4, LCMT2, MECP2, MBD4, ETF1, SUZ12, RNF8, DHFR, PRDM9, DNMT1, MAT2B, SUV420H1	1877	117	13588	1.9799552841641281	0.5122403879531291	0.009526764658583708	0.3649988122063075
no Peak	negative regulation of nucleobase, nucleoside, nucleotide and nucleic acid metabolic process	81	0.26287605880634796	2.565508207681464E-4	CLSPN, TSG101, CBX4, CBX3, MLH1, POT1B, ZEB1, CBX8, MAF1, CBFA2T2, TGFB1, CITED2, CBX5, SAP30, EPC1, WWP1, PCGF6, PRMT6, ZFP238, RARA, MYC, MYST3, KHDRBS1, EGR1, ATF7IP, CTBP1, GABPA, RBL1, ZHX2, MECP2, TLE4, NDUFA13, TTF1, LEF1, MBD3, MBD2, PURA, SUZ12, NCOA2, BPTF, HIPK3, SMARCA5, RAD18, TGIF1, ATPIF1, C1D, SMARCA4, BLM, PML, TXN1, ZC3H8, HEXIM1, LANCL2, NPM1, GATAD2A, PER1, SKIL, BCOR, TCF4, D…	1877	397	13588	1.477017965052223	0.6037674996415552	0.012107087469306221	0.47040696467902654
no Peak	phosphorylation	133	0.43163599779313927	2.5680901903036093E-4	RNASEL, PRPF4B, STK38, CAPZA2, TTK, AURKB, TGFB1, PRKX, MAP3K7, PRKAR2B, CSNK2A1, AAK1, CLK4, PIK3C3, PRKACB, TLK2, FRS2, INSR, MAP2K6, MAP2K5, PIK3CG, ROCK1, CSNK1G1, PIM1, MECP2, RPS6KC1, CDKL3, MARK3, STK4, MAPK1, MAPK6, CAMK4, RIOK3, ATP5C1, BMP2K, RIPK2, MAPK9, CSNK1G3, EIF2AK3, NEK7, NEK3, FGR, NEK1, STK17B, MAPKAPK3, CHEK1, RIOK2, IRAK4, IL12RB2, ATP6V0E, SBK1, 2610018G03RIK, SPNB2, DYRK3,…	1877	718	13588	1.3409681483669045	0.6041365444512297	0.011962752741979998	0.4708793366332009
no Peak	regulation of T cell mediated immunity	10	0.03245383442053679	2.6740010733653386E-4	H2-K1, H2-M3, IL20RB, TAP2, PPP3CB, CENPF, CD1D1, CD24A, PNP, SPN, CD1D2	1877	18	13588	4.0217841709583855	0.6189819773199835	0.012294421480526618	0.49025383340373097
no Peak	cellular macromolecular complex subunit organization	55	0.17849608931295233	2.6925868080547507E-4	MTSS1, XPO1, TUBB2B, HP1BP3, COX10, SURF6, CAPZA2, MLH1, EIF2A, SMNDC1, PICALM, PRMT5, CLP1, PTBP2, TUBA1A, TUBA1B, TUBA1C, MYST3, SRPK2, ELP2, ATPAF2, HIST1H1C, TTF1, IPO9, IPO8, MCM2, MBD2, WAS, FLNA, RPS14, SLU7, STMN1, SIP1, SMARCA2, XRN2, SMARCA4, TDRD3, FKBP4, AHCTF1, TSPYL1, EIF3D, TFAM, TSPYL3, TUBE1, PEX13, GEMIN6, TNPO1, CLEC2I, SCO1, KIF18A, MTRF1L, ETF1, MIS12, NEDD1, TUBD1	1877	245	13588	1.6251291139791026	0.6215291161855692	0.012223615578503377	0.49365339242730677
no Peak	rRNA processing	23	0.0746438191672346	2.872878694844694E-4	UTP18, LSM6, UTP6, MPHOSPH10, EXOSC2, NOB1, WBP11, RRP9, EXOSC1, FCF1, RCL1, DDX56, UTP11L, IMP3, FRG1, RPS14, NPM3, TFB2M, POP4, UTP14A, IMP4, FTSJ2, C1D	1877	74	13588	2.2500251983469886	0.6453711585687388	0.0128749439854009	0.5266252924825299
no Peak	hemopoietic or lymphoid organ development	61	0.1979683899652744	3.122972929830623E-4	XRCC5, MAEA, G6PDX, STAT5B, ITPKB, PRDX3, CD1D1, TPD52, CIAPIN1, TGFB1, CD1D2, MLL5, PICALM, WWP1, CASP8, FAS, SPN, MYST3, EGR1, OSTM1, LIG4, MYH9, TACC3, BCL2L11, PSEN1, GADD45G, VEGFA, NHEJ1, BLM, TIPARP, PML, SOX4, AHCTF1, TTC7, CD24A, RPA1, DOCK2, BCL2, POLM, PPP3CB, DYRK3, RUNX1, TRAF6, PIK3R1, APC, CD28, EBP, MSH2, TGFBR1, TGFBR2, SMAD5, BPGM, MALT1, ATP7A, PKNOX1, SP1, ID2, IRF1, JAK2, H2-…	1877	281	13588	1.5715014305026005	0.6759782426467785	0.013816559407656137	0.5723455879580008
no Peak	establishment of organelle localization	14	0.0454353681887515	3.466931116001519E-4	CCDC99, KIF18A, CENPF, MLH1, NUSAP1, BIRC5, MYH9, SCRIB, SYNE1, PSEN1, NPM1, RHOT1, NMD3, RAB27A	1877	34	13588	2.980851797298568	0.7138060727310088	0.015141341324035773	0.6351929098425413
no Peak	rRNA metabolic process	23	0.0746438191672346	3.54304918825376E-4	UTP18, LSM6, UTP6, MPHOSPH10, EXOSC2, NOB1, WBP11, RRP9, EXOSC1, FCF1, RCL1, DDX56, UTP11L, IMP3, FRG1, RPS14, NPM3, TFB2M, POP4, UTP14A, IMP4, FTSJ2, C1D	1877	75	13588	2.220024862369029	0.7215616644059981	0.015286281536873614	0.6490959679932962
no Peak	negative regulation of nitrogen compound metabolic process	81	0.26287605880634796	3.607721312988343E-4	CLSPN, TSG101, CBX4, CBX3, MLH1, POT1B, ZEB1, CBX8, MAF1, CBFA2T2, TGFB1, CITED2, CBX5, SAP30, EPC1, WWP1, PCGF6, PRMT6, ZFP238, RARA, MYC, MYST3, KHDRBS1, EGR1, ATF7IP, CTBP1, GABPA, RBL1, ZHX2, MECP2, TLE4, NDUFA13, TTF1, LEF1, MBD3, MBD2, PURA, SUZ12, NCOA2, BPTF, HIPK3, SMARCA5, RAD18, TGIF1, ATPIF1, C1D, SMARCA4, BLM, PML, TXN1, ZC3H8, HEXIM1, LANCL2, NPM1, GATAD2A, PER1, SKIL, BCOR, TCF4, D…	1877	401	13588	1.4622846187674128	0.7279857185126395	0.015379329387424812	0.6609069645914123
no Peak	T cell differentiation	23	0.0746438191672346	4.346135699909503E-4	EGR1, BLM, STAT5B, SOX4, ITPKB, LIG4, CD1D1, TGFB1, CD1D2, ATP7A, DOCK2, PKNOX1, WWP1, BCL2, GADD45G, PPP3CB, IRF1, FAS, H2-DMA, NHEJ1, NCOR1, SPN, CD28, APC	1877	76	13588	2.1908140089168047	0.791627224819462	0.01828288051402982	0.7956686546285785
no Peak	glutamine metabolic process	10	0.03245383442053679	4.4603264700284037E-4	GLUL, CTPS, GFPT1, GLS, GGH, MECP2, PHGDH, CAD, CTPS2, GMPS	1877	19	13588	3.810111319855312	0.8000413720619098	0.018542728344849935	0.8164931949954934
no Peak	electron transport chain	30	0.09736150326161036	4.774557596666264E-4	NDUFB3, ENOX2, TXN2, TXN1, UQCRFS1, UQCRQ, NDUFS6, NDUFS5, NDUFS4, CYB561D1, NDUFS3, ETFB, NDUFA4, TXNL1, NDUFB11, NDUFA9, NDUFA7, NDUFC2, MECP2, NDUFA13, CYB5B, NDUFA10, NDUFA12, NDUFA11, SDHA, FRRS1, UQCRH, SDHD, SLC37A2, UQCRB	1877	112	13588	1.9390745109977927	0.8214830561764208	0.019610583544945603	0.8737770055622818
no Peak	histone acetylation	14	0.0454353681887515	4.824908325410218E-4	MORF4L1, METTL8, YEATS4, TAF1, CSRP2BP, ING3, CREBBP, MECP2, MBD3, EPC1, EP300, PHF15, MYST2, MYST3	1877	35	13588	2.8956846030900376	0.8246983413744748	0.019592422153627442	0.8829529509533418
no Peak	cellular amino acid biosynthetic process	16	0.051926135072858856	5.302943293081821E-4	BCAT2, ALDH18A1, PSPH, MTHFD1, ADI1, GOT2, MTHFR, GLUL, PYCR2, GOT1, DHFR, MTR, PHGDH, MAT2B, THNSL1, PSAT1	1877	44	13588	2.63244054826367	0.8524826416131295	0.021273925272036642	0.9700303127430865
no Peak	regulation of transcription, DNA-dependent	245	0.7951189433031512	5.807583160382609E-4	STAT5B, SNIP1, HIRA, MED22, MED21, CITED2, ZFP472, EPC1, MYD88, FLI1, MED27, TRAK1, A430033K04RIK, RARA, SUPT5H, MECP2, ZHX2, BC011426, MED10, ZFP74, ZFP82, ZFP81, PRDM9, RAB18, JUN, SMARCAL1, VEGFA, TGIF1, BC049349, TXN1, 2610008E11RIK, HEXIM1, ZFP810, BCOR, TCF4, YEATS4, DNMT3A, KLF6, SUB1, SMAD5, CREBBP, SMAD4, SMAD3, SKI, ZFP606, ZSCAN2, ZFP607, ZFP748, RNF6, UPF3B, TRPS1, TCF12, NCOR1, RERE,…	1877	1465	13588	1.2106531190393501	0.8770508831644727	0.02301962956655257	1.061875449485461
no Peak	protein amino acid acetylation	14	0.0454353681887515	6.607335367805122E-4	MORF4L1, METTL8, YEATS4, TAF1, CSRP2BP, ING3, CREBBP, MECP2, MBD3, EPC1, EP300, PHF15, MYST2, MYST3	1877	36	13588	2.8152489196708697	0.907884726914237	0.02586526573908332	1.2072664743922212
no Peak	positive regulation of apoptosis	54	0.17525070587089864	6.651626962397548E-4	MLH1, PTEN, TGFB1, GPX1, CASP3, RPS3A, CASP7, FAS, NDUFS3, MYC, SPN, RAB27A, CCAR1, NDUFA13, MBD4, PRKCD, BCL2L11, DAPK1, XPA, TRIM35, ADRB2, CAPN10, PSEN1, RIPK2, MAPK9, ING3, PML, STK17B, NR3C1, RRM2B, CD24A, SCRIB, ZC3H8, UTP11L, SH3GLB1, TRP53BP2, TRP53INP1, ERCC3, TRAF6, CD5, APC, CD28, B4GALT1, PTPN6, KLF10, TGFBR1, NF1, NR4A1, SAP30BP, BRCA1, BNIP3L, APAF1, ID3, PDCD7	1877	248	13588	1.5762799250691735	0.9093460280538496	0.025757102767367757	1.2153125617882066
no Peak	regulation of RNA metabolic process	248	0.8048550936293123	6.760952545880057E-4	STAT5B, SNIP1, HIRA, MED22, MED21, CITED2, ZFP472, EPC1, MYD88, FLI1, MED27, TRAK1, A430033K04RIK, RARA, SUPT5H, MECP2, ZHX2, BC011426, MED10, ZFP74, ZFP82, ZFP81, PRDM9, RAB18, JUN, SMARCAL1, VEGFA, TGIF1, BC049349, TXN1, 2610008E11RIK, HEXIM1, ZFP810, BCOR, TCF4, YEATS4, DNMT3A, KLF6, SUB1, SMAD5, CREBBP, SMAD4, SMAD3, SKI, ZFP606, ZSCAN2, ZFP607, ZFP748, RNF6, UPF3B, TRPS1, TCF12, NCOR1, RERE,…	1877	1488	13588	1.2065352512875156	0.9128545456649118	0.025897221458353492	1.235170183389056
no Peak	hexose metabolic process	40	0.12981533768214715	7.192257053251527E-4	ALDOA, LDHB, LDHA, TALDO1, PFKFB3, ADPGK, PFKFB2, PGD, G6PDX, HK1, OGDH, GPI1, HIBADH, ACN9, GALK2, PPP1R3B, RPIA, MAN2B1, MYC, AGL, B4GALT1, PDK1, WDTC1, GMDS, PDK3, BPGM, FUCA2, PPP1CB, PGM2L1, MAN2A2, MAN2A1, PGLS, GBE1, H6PD, MAPK14, POFUT1, FPGT, FABP5, MDH2, MDH1	1877	169	13588	1.713422842065111	0.9254212731830308	0.027238122719407398	1.3134744265896003
no Peak	leukocyte differentiation	35	0.11358842047187875	7.717169304990665E-4	BLM, STAT5B, SOX4, ITPKB, CD1D1, TPD52, CD24A, TGFB1, CD1D2, DOCK2, BCL2, WWP1, CASP8, PPP3CB, POLM, FAS, TRAF6, PIK3R1, SPN, CD28, APC, EGR1, MSH2, TGFBR2, MALT1, LIG4, OSTM1, MYH9, ATP7A, PKNOX1, PSEN1, GADD45G, IRF1, H2-DMA, NCOR1, NHEJ1	1877	142	13588	1.7843126955660442	0.9382974244064435	0.02889464169921996	1.4086941560817023
no Peak	positive regulation of programmed cell death	54	0.17525070587089864	8.093474972422513E-4	MLH1, PTEN, TGFB1, GPX1, CASP3, RPS3A, CASP7, FAS, NDUFS3, MYC, SPN, RAB27A, CCAR1, NDUFA13, MBD4, PRKCD, BCL2L11, DAPK1, XPA, TRIM35, ADRB2, CAPN10, PSEN1, RIPK2, MAPK9, ING3, PML, STK17B, NR3C1, RRM2B, CD24A, SCRIB, ZC3H8, UTP11L, SH3GLB1, TRP53BP2, TRP53INP1, ERCC3, TRAF6, CD5, APC, CD28, B4GALT1, PTPN6, KLF10, TGFBR1, NF1, NR4A1, SAP30BP, BRCA1, BNIP3L, APAF1, ID3, PDCD7	1877	250	13588	1.56366968566862	0.9461368175708371	0.02997195232489913	1.4769029966635872
no Peak	negative regulation of cellular biosynthetic process	84	0.272612209132509	8.100119207928871E-4	CLSPN, TSG101, CBX4, CBX3, ZEB1, CBX8, MAF1, CBFA2T2, TGFB1, CITED2, CBX5, SAP30, EPC1, INSIG2, WWP1, TIA1, PCGF6, INSIG1, PRMT6, ZFP238, RARA, MYC, EIF2B5, MYST3, KHDRBS1, EGR1, ATF7IP, CTBP1, GABPA, RBL1, ZHX2, MECP2, TLE4, NDUFA13, TTF1, LEF1, MBD3, MBD2, PURA, SUZ12, NCOA2, BPTF, HIPK3, SMARCA5, TGIF1, EIF2AK3, SRP9, C1D, SMARCA4, PML, TXN1, ZC3H8, HEXIM1, LANCL2, GATAD2A, PER1, AATF, SKIL, B…	1877	430	13588	1.4141715503462973	0.9462658902920198	0.02969159261203591	1.478106924079059
no Peak	tRNA processing	21	0.06815305228312725	9.333670623449536E-4	FARS2, LCMT2, LSM6, RG9MTD1, 1190005F20RIK, PUS7L, URM1, TYW1, CLP1, TRDMT1, TRMT12, QTRTD1, RPP30, POP4, CDK5RAP1, DUS4L, TRUB1, TRUB2, DUS2L, DUS3L, TRIT1	1877	70	13588	2.171763452317528	0.9655814954949362	0.03379494326186672	1.7013840654538814
no Peak	cellular macromolecular complex assembly	48	0.15577840521857655	9.67548909303162E-4	MTSS1, TDRD3, XPO1, TUBB2B, SURF6, HP1BP3, COX10, FKBP4, CAPZA2, MLH1, AHCTF1, EIF2A, SMNDC1, TSPYL1, EIF3D, TFAM, TSPYL3, PICALM, PRMT5, CLP1, TUBE1, PEX13, PTBP2, TUBA1A, GEMIN6, TNPO1, TUBA1B, TUBA1C, CLEC2I, MYST3, SCO1, SRPK2, ELP2, ATPAF2, HIST1H1C, IPO9, IPO8, MCM2, MBD2, WAS, FLNA, MIS12, RPS14, TUBD1, SLU7, SIP1, SMARCA2, SMARCA4	1877	217	13588	1.6013002413401127	0.9695785209118984	0.03466380743079045	1.763169695911293
no Peak	positive regulation of cell death	54	0.17525070587089864	9.806634321776466E-4	MLH1, PTEN, TGFB1, GPX1, CASP3, RPS3A, CASP7, FAS, NDUFS3, MYC, SPN, RAB27A, CCAR1, NDUFA13, MBD4, PRKCD, BCL2L11, DAPK1, XPA, TRIM35, ADRB2, CAPN10, PSEN1, RIPK2, MAPK9, ING3, PML, STK17B, NR3C1, RRM2B, CD24A, SCRIB, ZC3H8, UTP11L, SH3GLB1, TRP53BP2, TRP53INP1, ERCC3, TRAF6, CD5, APC, CD28, B4GALT1, PTPN6, KLF10, TGFBR1, NF1, NR4A1, SAP30BP, BRCA1, BNIP3L, APAF1, ID3, PDCD7	1877	252	13588	1.5512596087982342	0.9709857939909043	0.03478045627260884	1.7868651923163004
no Peak	positive regulation of macromolecule metabolic process	116	0.3764644792782267	9.875908632810773E-4	AURKAIP1, STAT5B, FOXO1, MED21, CNOT7, PNP, TGFB1, CITED2, EPC1, MLL5, MYD88, WIBG, GATA3, RARA, ITCH, SUPT5H, SPN, MYST3, EIF2B5, MECP2, AHR, EP300, PRDM9, JUN, VEGFA, NFE2L2, PIAS1, HMGB2, CNBP, SOX4, AHCTF1, RNF168, RUNX1, TRAF6, KLF6, TAF8, SMAD5, CREBBP, SMAD4, NR4A1, SMAD3, NR4A3, ZFP148, DDX5, UIMC1, SREBF2, RNF8, RNF6, CBLB, NEDD4, DCP1A, GTF2F1, NCOR1, ENY2, ELF1, CHURC1, ELF4, CTCF, ZEB…	1877	633	13588	1.3266169587616286	0.9717026890887386	0.03468124472470624	1.7993795865551498
no Peak	negative regulation of protein kinase activity	17	0.05517151851491253	9.878708187982845E-4	PTPN6, NF2, HMGCR, NF1, CASP3, CDKN1B, PSEN1, HEXIM1, HIPK3, GADD45G, ZFYVE28, SPRED2, SPRED1, CDK5RAP1, GADD45B, GADD45A, APC	1877	51	13588	2.413070502575031	0.9717312854233301	0.034356712124149036	1.7998852940907306
no Peak	negative regulation of kinase activity	17	0.05517151851491253	9.878708187982845E-4	PTPN6, NF2, HMGCR, NF1, CASP3, CDKN1B, PSEN1, HEXIM1, HIPK3, GADD45G, ZFYVE28, SPRED2, SPRED1, CDK5RAP1, GADD45B, GADD45A, APC	1877	51	13588	2.413070502575031	0.9717312854233301	0.034356712124149036	1.7998852940907306
no Peak	regulation of lymphocyte activation	35	0.11358842047187875	0.0010032694900413718	BLM, STAT5B, IL4RA, ITPKB, ZEB1, CD1D1, CD24A, PNP, TGFB1, CD1D2, ZC3H8, CASP3, MYD88, FAS, ITCH, CD5, SPN, PAG1, RC3H1, CD28, CLEC2I, AP3B1, PTPN6, SIT1, TGFBR2, CENPF, MALT1, LAT, PRKCQ, CBLB, IL20RB, LYST, CD274, RIPK2, HSPD1, H2-DMA	1877	144	13588	1.7595305747942935	0.9732604985300607	0.03455031819023835	1.8276974351638997
no Peak	negative regulation of biosynthetic process	84	0.272612209132509	0.0010785742319590346	CLSPN, TSG101, CBX4, CBX3, ZEB1, CBX8, MAF1, CBFA2T2, TGFB1, CITED2, CBX5, SAP30, EPC1, INSIG2, WWP1, TIA1, PCGF6, INSIG1, PRMT6, ZFP238, RARA, MYC, EIF2B5, MYST3, KHDRBS1, EGR1, ATF7IP, CTBP1, GABPA, RBL1, ZHX2, MECP2, TLE4, NDUFA13, TTF1, LEF1, MBD3, MBD2, PURA, SUZ12, NCOA2, BPTF, HIPK3, SMARCA5, TGIF1, EIF2AK3, SRP9, C1D, SMARCA4, PML, TXN1, ZC3H8, HEXIM1, LANCL2, GATAD2A, PER1, AATF, SKIL, B…	1877	434	13588	1.4011377111725987	0.9796280428372568	0.03674626965176442	1.9636010249228453
no Peak	induction of programmed cell death	39	0.12656995424009346	0.0011049871078201252	PML, STK17B, MLH1, RRM2B, CD24A, PTEN, GPX1, UTP11L, CASP3, RPS3A, TRP53BP2, SH3GLB1, CASP7, TRP53INP1, FAS, ERCC3, TRAF6, NDUFS3, CD5, MYC, SPN, CD28, RAB27A, PTPN6, KLF10, TGFBR1, NR4A1, NDUFA13, MBD4, SAP30BP, PRKCD, BRCA1, DAPK1, XPA, TRIM35, BNIP3L, MAPK9, APAF1, PDCD7	1877	167	13588	1.6905943041992733	0.9814817359263681	0.03727787007703931	2.011226579606795
no Peak	induction of apoptosis	39	0.12656995424009346	0.0011049871078201252	PML, STK17B, MLH1, RRM2B, CD24A, PTEN, GPX1, UTP11L, CASP3, RPS3A, TRP53BP2, SH3GLB1, CASP7, TRP53INP1, FAS, ERCC3, TRAF6, NDUFS3, CD5, MYC, SPN, CD28, RAB27A, PTPN6, KLF10, TGFBR1, NR4A1, NDUFA13, MBD4, SAP30BP, PRKCD, BRCA1, DAPK1, XPA, TRIM35, BNIP3L, MAPK9, APAF1, PDCD7	1877	167	13588	1.6905943041992733	0.9814817359263681	0.03727787007703931	2.011226579606795
no Peak	nucleobase, nucleoside, nucleotide and nucleic acid biosynthetic process	41	0.1330607211242008	0.0012010824559568374	ATP1B3, CTPS, G6PDX, ATP10A, DTYMK, CAD, CTPS2, RRM2B, PNP, MTHFD1, TYMS, ATP6V0E, QTRTD1, DHODH, ATP8B2, ATP5O, PAPSS1, IMPDH1, ATP5J, ADAL, ATP5F1, ATP6V1H, ATP1A1, ATP11C, ATP6V1D, GMPS, GART, PRPSAP2, AMPD1, ATP6V1C1, ATP7A, ATP6V1A, UMPS, DHFR, ATP2A3, ADK, RRM2, ATP5C1, PRPS2, ATP8A1, PRPS1	1877	179	13588	1.6581434179705519	0.9869126614037114	0.040081312327169716	2.184313393828441
no Peak	nucleobase, nucleoside and nucleotide biosynthetic process	41	0.1330607211242008	0.0012010824559568374	ATP1B3, CTPS, G6PDX, ATP10A, DTYMK, CAD, CTPS2, RRM2B, PNP, MTHFD1, TYMS, ATP6V0E, QTRTD1, DHODH, ATP8B2, ATP5O, PAPSS1, IMPDH1, ATP5J, ADAL, ATP5F1, ATP6V1H, ATP1A1, ATP11C, ATP6V1D, GMPS, GART, PRPSAP2, AMPD1, ATP6V1C1, ATP7A, ATP6V1A, UMPS, DHFR, ATP2A3, ADK, RRM2, ATP5C1, PRPS2, ATP8A1, PRPS1	1877	179	13588	1.6581434179705519	0.9869126614037114	0.040081312327169716	2.184313393828441
no Peak	mitochondrion organization	26	0.08437996949339564	0.0012207558594770295	GRPEL2, SPG7, GRPEL1, COX10, RRM2B, CD24A, TFAM, CASP3, MRPL15, FXN, SH3GLB1, MAP3K1, BCL2, CASP7, COL4A3BP, MRPL39, SLC22A5, MYC, OPA1, SSBP1, DCTN6, ATP7A, MFN2, MAN2A1, NRF1, DAP3	1877	97	13588	1.9404072082562105	0.9878104680525573	0.040351854627892814	2.2197134316587652
no Peak	monosaccharide metabolic process	43	0.1395514880083082	0.0012857076288742392	ALDOA, LDHB, LDHA, TALDO1, PFKFB3, GNE, ADPGK, PFKFB2, PGD, G6PDX, HK1, OGDH, GPI1, HIBADH, ACN9, GALK2, AKR1A4, PPP1R3B, RPIA, MAN2B1, MYC, AGL, B4GALT1, PDK1, WDTC1, GMDS, CMAS, PDK3, BPGM, FUCA2, PPP1CB, PGM2L1, MAN2A2, MAN2A1, PGLS, GBE1, H6PD, MAPK14, POFUT1, FPGT, FABP5, MDH2, MDH1	1877	191	13588	1.6297701300114085	0.9903598419482063	0.042069254384582644	2.336500705769118
no Peak	regulation of alpha-beta T cell activation	13	0.04218998474669782	0.0013341407026014691	BLM, IL4RA, TGFBR2, ITPKB, CD1D1, PNP, CD24A, CD1D2, CBLB, RIPK2, ITCH, RC3H1, CD28, AP3B1	1877	34	13588	2.7679338117772416	0.9919073052751276	0.04322857953515713	2.4235004893923606
no Peak	ribonucleoprotein complex assembly	13	0.04218998474669782	0.0013341407026014691	SRPK2, TDRD3, SURF6, EIF2A, SMNDC1, EIF3D, PRMT5, CLP1, RPS14, SLU7, PTBP2, GEMIN6, SIP1	1877	34	13588	2.7679338117772416	0.9919073052751276	0.04322857953515713	2.4235004893923606
no Peak	ubiquitin-dependent protein catabolic process	34	0.11034303702982506	0.0013828436765136354	DERL2, DERL1, USP3, UBE3A, USP9X, UBE2G2, EDEM3, 2700078E11RIK, RBX1, OS9, ARIH1, USP19, USP38, USP11, USP37, ITCH, USP32, FBXO8, UBE4B, PCNP, UBR2, USP28, PSMA1, RNF6, UHRF2, CUL4A, PSMA6, PSMA4, USP47, SIAH2, TCEB1, USP48, USP25, USP45	1877	141	13588	1.7456254699478948	0.9932130449171939	0.044374006380008546	2.510911191381593
no Peak	lymphocyte differentiation	29	0.09411611981955667	0.0014338342708286717	BLM, STAT5B, SOX4, ITPKB, TPD52, CD1D1, CD24A, TGFB1, CD1D2, DOCK2, BCL2, WWP1, PPP3CB, POLM, FAS, PIK3R1, SPN, CD28, APC, EGR1, MSH2, MALT1, LIG4, ATP7A, PKNOX1, GADD45G, IRF1, H2-DMA, NCOR1, NHEJ1	1877	114	13588	1.8415538045967341	0.9943550074830612	0.04556860829584686	2.6023483046070495
no Peak	negative regulation of RNA metabolic process	63	0.20445915684938176	0.0014623582769769338	TSG101, CBX4, CBX3, ZEB1, CBX8, MAF1, CBFA2T2, TGFB1, CITED2, CBX5, SAP30, EPC1, PCGF6, PRMT6, ZFP238, RARA, MYC, EGR1, ATF7IP, CTBP1, RBL1, GABPA, ZHX2, MECP2, NDUFA13, LEF1, TLE4, MBD3, MBD2, PURA, SUZ12, NCOA2, BPTF, HIPK3, SMARCA5, TGIF1, SMARCA4, TXN1, HEXIM1, NPM1, GATAD2A, PER1, SKIL, BCOR, TCF4, DNMT3A, WDTC1, EHMT1, RFX5, SIRT4, SMAD3, SKI, TRIM24, FOXP4, ID2, TRPS1, ZRANB1, DNMT1, HIVEP…	1877	310	13588	1.4711945967312288	0.9949078251850015	0.04604931902412546	2.6534626122505345
no Peak	response to ionizing radiation	16	0.051926135072858856	0.0014719984572816596	BRCC3, APOBEC1, 1110054O05RIK, MSH2, NEK1, PML, LIG4, PNP, UIMC1, RNF8, GPX1, TRP53BP2, BCL2, BRE, RNF168, NHEJ1	1877	48	13588	2.413070502575031	0.9950821465983148	0.04594538820825811	2.6707318392720114
no Peak	negative regulation of transferase activity	17	0.05517151851491253	0.001560667493830491	PTPN6, NF2, HMGCR, NF1, CASP3, CDKN1B, PSEN1, HEXIM1, HIPK3, GADD45G, ZFYVE28, SPRED2, SPRED1, CDK5RAP1, GADD45B, GADD45A, APC	1877	53	13588	2.3220112383269167	0.9964303469292124	0.04823044820712119	2.8294359831261606
no Peak	cellular protein localization	61	0.1979683899652744	0.001590987177678347	GRPEL2, XPO1, GRPEL1, TIMM17B, AP3S2, AP3S1, SRP19, TGFB1, PEX7, COPB1, TRAK1, STAM, RAB27A, AP3B1, SNUPN, VPS41, IPO9, IPO8, FLNA, BCAP31, MFN2, KPNA4, SRP9, NXT1, PACS1, AP1M1, CCDC99, DERL2, DERL1, NAPG, STX4A, AKAP12, PML, SNX2, SNX1, NFKBIA, POLA2, CD24A, TOMM7, AP3M2, SH3GLB1, SPNB2, TAP2, PEX13, TNPO1, SRGN, SEC61A1, HSPA9, ARFIP1, AP4S1, YWHAG, YWHAH, VCP, ERBB2IP, YWHAQ, JAK2, GOSR2, GOS…	1877	299	13588	1.4768959932148185	0.9968007950191055	0.04872800035888192	2.883647459308236
no Peak	regulation of DNA metabolic process	18	0.058416901956966215	0.0016179776759231602	CLSPN, BRCC3, BLM, MSH2, WRNIP1, GMNN, TTF1, MLH1, POT1B, PNP, TGFB1, UIMC1, RNF8, BRE, RAD18, RNF168, ID3, CD28	1877	58	13588	2.2466518472250288	0.9970981045717463	0.049118130251190384	2.931882302632338
no Peak	RNA biosynthetic process	31	0.10060688670366404	0.001678066232675569	POLR2G, LMO4, MED21, POLR2D, POLR2A, GTF2E1, TFAM, GTF2A1, PRIM2, NFAT5, NPM3, ERCC3, MYC, TAF1, ELP2, BRF1, TTF1, SMAD3, CDK7, TRIM24, GTF2B, AHR, GTF2H1, MNAT1, TAF13, TAF12, ABT1, GTF2F1, THRAP3, TCEB3, XRN2	1877	126	13588	1.7810758471387136	0.9976645450151559	0.0504727152883373	3.039185496043839
no Peak	intracellular protein transport	57	0.18498685619705968	0.0017243809215515356	XPO1, GRPEL2, GRPEL1, TIMM17B, AP3S2, AP3S1, SRP19, TGFB1, PEX7, COPB1, TRAK1, STAM, RAB27A, AP3B1, SNUPN, VPS41, IPO9, IPO8, BCAP31, MFN2, KPNA4, SRP9, NXT1, PACS1, AP1M1, DERL2, DERL1, NAPG, STX4A, AKAP12, SNX2, PML, SNX1, NFKBIA, POLA2, CD24A, TOMM7, AP3M2, SPNB2, TAP2, PEX13, TNPO1, SEC61A1, HSPA9, ARFIP1, AP4S1, YWHAG, YWHAH, VCP, ERBB2IP, YWHAQ, JAK2, GOSR2, GOSR1, GGA1, AP4B1, TOB1	1877	276	13588	1.495054550508443	0.9980245058604897	0.05140245173505831	3.1218154387862906
no Peak	cellular macromolecule localization	61	0.1979683899652744	0.001874234590155983	GRPEL2, XPO1, GRPEL1, TIMM17B, AP3S2, AP3S1, SRP19, TGFB1, PEX7, COPB1, TRAK1, STAM, RAB27A, AP3B1, SNUPN, VPS41, IPO9, IPO8, FLNA, BCAP31, MFN2, KPNA4, SRP9, NXT1, PACS1, AP1M1, CCDC99, DERL2, DERL1, NAPG, STX4A, AKAP12, PML, SNX2, SNX1, NFKBIA, POLA2, CD24A, TOMM7, AP3M2, SH3GLB1, SPNB2, TAP2, PEX13, TNPO1, SRGN, SEC61A1, HSPA9, ARFIP1, AP4S1, YWHAG, YWHAH, VCP, ERBB2IP, YWHAQ, JAK2, GOSR2, GOS…	1877	301	13588	1.467082730801431	0.9988506783049523	0.05529148764608205	3.388713048216452
no Peak	pentose-phosphate shunt	6	0.01947230065232207	0.0019424043307350969	PGLS, TALDO1, H6PD, PGD, RPIA, HIBADH	1877	8	13588	5.429408630793819	0.9991017031945585	0.056782538493765466	3.509896873227436
no Peak	negative regulation of macromolecule biosynthetic process	80	0.2596306753642943	0.001964348602461691	CLSPN, TSG101, CBX4, CBX3, ZEB1, CBX8, MAF1, CBFA2T2, TGFB1, CITED2, CBX5, SAP30, EPC1, WWP1, TIA1, PCGF6, PRMT6, ZFP238, RARA, MYC, EIF2B5, MYST3, KHDRBS1, EGR1, ATF7IP, CTBP1, GABPA, RBL1, ZHX2, MECP2, TLE4, NDUFA13, TTF1, LEF1, MBD3, MBD2, PURA, SUZ12, NCOA2, BPTF, HIPK3, SMARCA5, TGIF1, EIF2AK3, SRP9, C1D, SMARCA4, PML, TXN1, ZC3H8, HEXIM1, LANCL2, GATAD2A, PER1, AATF, SKIL, BCOR, TCF4, DNMT3…	1877	418	13588	1.3854950254019318	0.9991702116747361	0.056945221497599174	3.5488761233620103
no Peak	negative regulation of transcription, DNA-dependent	62	0.20121377340732807	0.002024641828279963	TSG101, CBX4, CBX3, ZEB1, CBX8, MAF1, CBFA2T2, TGFB1, CITED2, CBX5, SAP30, EPC1, PCGF6, PRMT6, ZFP238, RARA, MYC, EGR1, ATF7IP, CTBP1, RBL1, GABPA, ZHX2, MECP2, NDUFA13, LEF1, TLE4, MBD3, MBD2, PURA, SUZ12, NCOA2, BPTF, HIPK3, SMARCA5, TGIF1, SMARCA4, TXN1, HEXIM1, GATAD2A, PER1, SKIL, BCOR, TCF4, DNMT3A, WDTC1, EHMT1, RFX5, SIRT4, SMAD3, SKI, TRIM24, FOXP4, ID2, TRPS1, ZRANB1, DNMT1, HIVEP1, ID3…	1877	308	13588	1.4572438749316747	0.9993327278830696	0.05817612275736361	3.655897349693882
no Peak	transcription, DNA-dependent	30	0.09736150326161036	0.002039192776821727	POLR2G, LMO4, MED21, POLR2D, POLR2A, GTF2E1, TFAM, GTF2A1, NFAT5, NPM3, ERCC3, MYC, TAF1, ELP2, BRF1, TTF1, SMAD3, CDK7, TRIM24, GTF2B, AHR, GTF2H1, MNAT1, TAF13, TAF12, ABT1, GTF2F1, THRAP3, TCEB3, XRN2	1877	122	13588	1.7801339773094491	0.9993669235307855	0.058119992410239796	3.6817086396951137
no Peak	regulation of microtubule-based process	15	0.04868075163080518	0.0021965914902847246	XPO1, ARHGEF2, CAPZA2, CENPF, CENPE, TACC3, TACC1, TACC2, CDKN1B, NPM1, MKKS, CLASP1, RANBP1, STMN1, APC	1877	45	13588	2.4130705025750308	0.9996416567349803	0.06198001640144546	3.960493729434933
no Peak	nucleotide biosynthetic process	39	0.12656995424009346	0.002419110298709254	ATP1B3, CTPS, G6PDX, ATP10A, DTYMK, CTPS2, RRM2B, PNP, MTHFD1, TYMS, ATP6V0E, DHODH, ATP8B2, ATP5O, PAPSS1, IMPDH1, ATP5J, ADAL, ATP5F1, ATP6V1H, ATP1A1, ATP11C, ATP6V1D, GMPS, GART, AMPD1, PRPSAP2, ATP6V1C1, ATP7A, ATP6V1A, UMPS, DHFR, ATP2A3, ADK, RRM2, ATP5C1, PRPS2, ATP8A1, PRPS1	1877	174	13588	1.6225818896625206	0.999839741783971	0.06752206836133556	4.353318163156928
no Peak	positive regulation of nucleobase, nucleoside, nucleotide and nucleic acid metabolic process	94	0.3050660435530458	0.0025891303523967193	ENY2, ELF1, CHURC1, ELF4, STAT5B, FOXO1, ZEB1, CNOT7, MED21, PNP, RFXANK, TGFB1, CITED2, ZBTB38, EPC1, FOS, MLL5, MYD88, GATA3, SERTAD3, RARA, SUPT5H, MYC, TOP2A, SERTAD2, MYST3, EGR1, ATF7IP, BRF1, BRCC3, MECP2, LEF1, TTF1, TOPORS, AHR, PRPF6, MED6, ADRB2, NCOA2, EP300, PRDM9, ZMIZ2, JUN, ZMIZ1, VEGFA, NFE2L2, ABLIM1, HMGB2, CNBP, ING2, UBE3A, SOX4, AHCTF1, NUFIP1, NFYC, NFYB, NFYA, CALCOCO1, RE…	1877	510	13588	1.3342860426003114	0.9999133554563068	0.0715471558541575	4.652439275857367
no Peak	negative regulation of gene expression	78	0.2531399084801869	0.0026511762311029518	TSG101, RBM3, CBX4, CBX3, CTCF, ZEB1, CBX8, MAF1, CBFA2T2, TGFB1, CITED2, CBX5, SAP30, EPC1, WWP1, CLP1, SND1, PCGF6, PRMT6, ZFP238, RARA, MYC, MYST3, KHDRBS1, EGR1, ATF7IP, CTBP1, GABPA, RBL1, ZHX2, MECP2, TLE4, NDUFA13, LEF1, MBD3, MBD2, PURA, SUZ12, NCOA2, BPTF, HIPK3, SMARCA5, TGIF1, C1D, SMARCA4, UTP3, PML, TXN1, ZC3H8, HEXIM1, LANCL2, GATAD2A, PER1, SKIL, BCOR, TCF4, TNRC6B, DNMT3A, WDTC1, …	1877	410	13588	1.3772158478111152	0.9999307748371298	0.07264466852535523	4.7613778842098835
no Peak	cellular protein complex assembly	27	0.08762535293544932	0.002807002614325872	XPO1, MTSS1, TUBB2B, COX10, CAPZA2, FKBP4, AHCTF1, MLH1, TFAM, PICALM, TUBE1, PEX13, TUBA1A, TNPO1, TUBA1B, TUBA1C, SCO1, CLEC2I, ATPAF2, ELP2, IPO9, IPO8, MBD2, WAS, MIS12, FLNA, TUBD1	1877	108	13588	1.8098028769312735	0.9999606063640887	0.07617594562105923	5.034455232000756
no Peak	regulation of myeloid cell differentiation	16	0.051926135072858856	0.00287123854901118	LDB1, KLF10, NF1, STAT5B, NFKBIA, ID2, MAPK14, CLEC2D, GNAS, FAS, THOC5, RUNX1, RBM15, TOB2, PIK3R1, APC	1877	51	13588	2.2711251788941467	0.9999687761836412	0.07727234978744624	5.146809596569357
no Peak	protein amino acid phosphorylation	114	0.36997371239411936	0.0029619026884024663	RNASEL, PRPF4B, STK38, CAPZA2, TTK, AURKB, TGFB1, PRKX, MAP3K7, PRKAR2B, CSNK2A1, AAK1, CLK4, PIK3C3, TLK2, PRKACB, FRS2, INSR, MAP2K6, MAP2K5, PIK3CG, CSNK1G1, ROCK1, PIM1, RPS6KC1, CDKL3, MARK3, STK4, MAPK1, MAPK6, CAMK4, RIOK3, BMP2K, RIPK2, MAPK9, CSNK1G3, EIF2AK3, NEK7, NEK3, FGR, NEK1, MAPKAPK3, STK17B, CHEK1, RIOK2, IRAK4, IL12RB2, SBK1, 2610018G03RIK, SPNB2, DYRK3, STK38L, TEC, MAP2K1, TG…	1877	640	13588	1.289484549813532	0.9999775091606785	0.07902848622006575	5.305175357603719
no Peak	maintenance of protein location	11	0.03569921786259046	0.0030094432248231047	FGFR1OP, PXMP3, NUF2, PML, TMSB10, TMSB4X, CENPE, TACC3, SRGN, FLNA, OS9	1877	28	13588	2.8439759494634296	0.9999810639374641	0.07965898630497914	5.388115879396582
no Peak	positive regulation of nitrogen compound metabolic process	96	0.3115568104371531	0.0031309317217176518	ENY2, ELF1, CHURC1, ELF4, STAT5B, FOXO1, ZEB1, CNOT7, MED21, PNP, RFXANK, TGFB1, CITED2, ZBTB38, EPC1, FOS, MLL5, MYD88, GATA3, SERTAD3, RARA, SUPT5H, MYC, TOP2A, SERTAD2, MYST3, EGR1, ATF7IP, BRF1, BRCC3, MECP2, LEF1, TTF1, TOPORS, AHR, PRPF6, MED6, ADRB2, NCOA2, EP300, PRDM9, ZMIZ2, JUN, ZMIZ1, VEGFA, NFE2L2, ABLIM1, HMGB2, CNBP, ING2, UBE3A, SOX4, AHCTF1, NUFIP1, NFYC, ITGB2, NFYB, NFYA, CALCO…	1877	526	13588	1.3212249139574315	0.9999878005877286	0.08214242859864684	5.599756084359752
no Peak	regulation of leukocyte activation	35	0.11358842047187875	0.0033049424661853884	BLM, STAT5B, IL4RA, ITPKB, ZEB1, CD1D1, CD24A, PNP, TGFB1, CD1D2, ZC3H8, CASP3, MYD88, FAS, ITCH, CD5, SPN, PAG1, RC3H1, CD28, CLEC2I, AP3B1, PTPN6, SIT1, TGFBR2, CENPF, MALT1, LAT, PRKCQ, CBLB, IL20RB, LYST, CD274, RIPK2, HSPD1, H2-DMA	1877	154	13588	1.6452753426647941	0.9999935017678284	0.08588999925682583	5.902113506429918
no Peak	glucose catabolic process	16	0.051926135072858856	0.003529800017743557	ALDOA, LDHB, LDHA, TALDO1, ADPGK, PGD, HK1, BPGM, OGDH, GPI1, HIBADH, PGLS, H6PD, RPIA, MDH2, MDH1	1877	52	13588	2.227449694684644	0.9999971209449168	0.09081739239044262	6.291465218454673
no Peak	hexose catabolic process	16	0.051926135072858856	0.003529800017743557	ALDOA, LDHB, LDHA, TALDO1, ADPGK, PGD, HK1, BPGM, OGDH, GPI1, HIBADH, PGLS, H6PD, RPIA, MDH2, MDH1	1877	52	13588	2.227449694684644	0.9999971209449168	0.09081739239044262	6.291465218454673
no Peak	cell cycle checkpoint	16	0.051926135072858856	0.003529800017743557	CLSPN, BRCC3, MSH2, PML, CENPE, CHEK1, BIRC5, CEP63, UIMC1, PURA, PTPN11, MAD2L1BP, MAD2L1, MAPK14, BRE, APC	1877	52	13588	2.227449694684644	0.9999971209449168	0.09081739239044262	6.291465218454673
no Peak	negative regulation of molecular function	31	0.10060688670366404	0.0035592717712202944	HMGCR, NFKBIA, CASP3, HEXIM1, SPRED2, SPRED1, CAT, CDK5RAP1, MYC, ANGPTL4, APC, CFLAR, PTPN6, NF2, NF1, STIM2, NR4A1, BIRC5, FLNA, ATP7A, ADRB2, CDKN1B, PSEN1, HIPK3, GADD45G, ZFYVE28, JAK2, PPP2R4, ATPIF1, GADD45B, GADD45A	1877	132	13588	1.700117854086954	0.9999974123508176	0.0908948582888004	6.342383919307293
no Peak	negative regulation of transcription	71	0.2304222243858112	0.003851048127532568	TSG101, CBX4, CBX3, ZEB1, CBX8, MAF1, CBFA2T2, TGFB1, CITED2, CBX5, SAP30, EPC1, WWP1, PCGF6, PRMT6, ZFP238, RARA, MYC, MYST3, KHDRBS1, EGR1, ATF7IP, CTBP1, GABPA, RBL1, ZHX2, MECP2, NDUFA13, LEF1, TLE4, MBD3, MBD2, PURA, SUZ12, NCOA2, BPTF, HIPK3, SMARCA5, TGIF1, C1D, SMARCA4, PML, TXN1, ZC3H8, HEXIM1, LANCL2, GATAD2A, PER1, SKIL, BCOR, TCF4, DNMT3A, WDTC1, EHMT1, RFX5, SIRT4, CENPF, SMAD3, SKI,…	1877	372	13588	1.3816774651840904	0.9999991004802999	0.09729843337897381	6.8450797630128735
no Peak	amine biosynthetic process	20	0.06490766884107357	0.003991919739406247	ODC1, BCAT2, ALDH18A1, PSPH, MTHFD1, ADI1, ATP7A, GOT2, MTHFR, GLUL, PYCR2, DHFR, GOT1, GATA3, MTR, PHGDH, MAT2B, THNSL1, PSAT1, AMD2	1877	73	13588	1.98334561855482	0.9999994599859386	0.09998213129524769	7.08687045607107
no Peak	regulation of cell activation	35	0.11358842047187875	0.004102575846695637	BLM, STAT5B, IL4RA, ITPKB, ZEB1, CD1D1, CD24A, PNP, TGFB1, CD1D2, ZC3H8, CASP3, MYD88, FAS, ITCH, CD5, SPN, PAG1, RC3H1, CD28, CLEC2I, AP3B1, PTPN6, SIT1, TGFBR2, CENPF, MALT1, LAT, PRKCQ, CBLB, IL20RB, LYST, CD274, RIPK2, HSPD1, H2-DMA	1877	156	13588	1.6241820690408864	0.9999996383324121	0.1019074702501277	7.276383259876972
no Peak	glutamine family amino acid metabolic process	14	0.0454353681887515	0.004122052427532009	ALDH18A1, CTPS, GGH, MECP2, CAD, CTPS2, GMPS, GOT2, GLUL, PYCR2, GOT1, GLS, GFPT1, PHGDH	1877	43	13588	2.3569525839104957	0.9999996629727294	0.10166889161748482	7.309701555909176
no Peak	protein amino acid methylation	14	0.0454353681887515	0.004122052427532009	LCMT1, EHMT1, 4833442J19RIK, LCMT2, EZH2, MECP2, ETF1, SUZ12, MLL5, PRDM9, PRMT5, PRMT6, EED, SUV420H1	1877	43	13588	2.3569525839104957	0.9999996629727294	0.10166889161748482	7.309701555909176
no Peak	protein amino acid alkylation	14	0.0454353681887515	0.004122052427532009	LCMT1, EHMT1, 4833442J19RIK, LCMT2, EZH2, MECP2, ETF1, SUZ12, MLL5, PRDM9, PRMT5, PRMT6, EED, SUV420H1	1877	43	13588	2.3569525839104957	0.9999996629727294	0.10166889161748482	7.309701555909176
no Peak	double-strand break repair	14	0.0454353681887515	0.004122052427532009	XRCC5, BRCC3, MSH2, MRE11A, SHFM1, MLH1, LIG4, UIMC1, SETX, RPA1, RNF8, BRE, RNF168, NHEJ1	1877	43	13588	2.3569525839104957	0.9999996629727294	0.10166889161748482	7.309701555909176
no Peak	protein amino acid acylation	15	0.04868075163080518	0.004256458584016234	MORF4L1, TAF1, METTL8, YEATS4, CSRP2BP, ING3, CREBBP, ZDHHC7, MECP2, MBD3, EPC1, EP300, PHF15, MYST2, MYST3	1877	48	13588	2.2622535961640917	0.9999997929031905	0.10410238284375983	7.539319726030969
no Peak	negative regulation of lipid biosynthetic process	5	0.016226917210268393	0.00430541958100163	WDTC1, INSIG2, INSIG1, ATP1A1, BRCA1	1877	6	13588	6.032676256437578	0.9999998265697327	0.10453105064690482	7.622830482458232
no Peak	induction of apoptosis by extracellular signals	10	0.03245383442053679	0.004539171145467029	CASP3, NDUFA13, MAPK9, FAS, TRAF6, CD24A, CD5, SPN, CD28, DAPK1	1877	25	13588	2.8956846030900376	0.9999999256596607	0.1091648272392266	8.020548749565604
no Peak	transcription from RNA polymerase II promoter	20	0.06490766884107357	0.004691013624053735	POLR2G, ELP2, LMO4, SMAD3, CDK7, MED21, POLR2D, AHR, POLR2A, GTF2H1, MNAT1, GTF2E1, TAF13, GTF2A1, ABT1, GTF2F1, THRAP3, TCEB3, ERCC3, MYC	1877	74	13588	1.9565436507365117	0.9999999571259831	0.11186930047520027	8.278034122611944
no Peak	regulation of binding	23	0.0746438191672346	0.004692481507711605	HMGB2, BLM, CREBBP, SMAD4, SMAD3, NFKBIA, ITGB2, MALT1, TGFB1, FLNA, MAPK1, PRKCQ, ADRB2, MYD88, PSEN1, HIPK3, CALM3, RIPK2, JAK2, BRD4, CAT, MYC, EIF2AK3, CALM1	1877	90	13588	1.8500207186408573	0.9999999573535138	0.11117014505732192	8.280519942181963
no Peak	negative regulation of catalytic activity	25	0.08113458605134197	0.004764941564829124	HMGCR, CASP3, HEXIM1, SPRED2, SPRED1, CDK5RAP1, APC, ANGPTL4, PTPN6, CFLAR, NF2, NF1, NR4A1, BIRC5, FLNA, ATP7A, CDKN1B, PSEN1, HIPK3, GADD45G, ZFYVE28, PPP2R4, ATPIF1, GADD45B, GADD45A	1877	101	13588	1.791884036565617	0.9999999672053015	0.11205748081448852	8.403149847684599
no Peak	negative regulation of myeloid cell differentiation	9	0.029208450978483107	0.004964264669826133	LDB1, NF1, STAT5B, CLEC2D, NFKBIA, THOC5, RBM15, PIK3R1, TOB2	1877	21	13588	3.1025192175964684	0.9999999840797229	0.11572223907567769	8.739680851101262
no Peak	regulation of mitotic cell cycle	24	0.07788920260928828	0.005078008926398693	STAT5B, PML, CENPF, NUSAP1, BIRC5, ANAPC10, CENPE, TGFB1, SCRIB, PURA, MAD2L1BP, YWHAH, MAD2L1, BCL2, 4933424B01RIK, MTBP, MDM2, HECTD3, THAP1, RANBP1, AATF, MYC, CD28, APC	1877	96	13588	1.8098028769312733	0.9999999894604664	0.1174618685253469	8.931198854832623
no Peak	ribonucleoside monophosphate biosynthetic process	8	0.025963067536429428	0.005176104006399021	ADAL, DHODH, IMPDH1, GMPS, PRPS2, GART, AMPD1, PRPS1	1877	17	13588	3.4066877683412202	0.9999999926155069	0.11883706482800172	9.096062131267002
no Peak	monosaccharide catabolic process	16	0.051926135072858856	0.005218166625486836	ALDOA, LDHB, LDHA, TALDO1, ADPGK, PGD, HK1, BPGM, OGDH, GPI1, HIBADH, PGLS, H6PD, RPIA, MDH2, MDH1	1877	54	13588	2.1449515578444722	0.999999993660325	0.11899106002729576	9.166668092331665
no Peak	regulation of gene expression, epigenetic	19	0.06166228539901989	0.005733553980008585	ATF7IP, DNMT3A, RBM3, SIRT4, MECP2, MBD4, CTCF, MBD3, CBX8, BRCA1, EPC1, MLL5, CLP1, SND1, TRDMT1, SMARCA5, EED, DNMT1, SMARCA4	1877	70	13588	1.9649288378110967	0.9999999990226678	0.12916953323241176	10.027593400066259
no Peak	alcohol catabolic process	18	0.058416901956966215	0.005955848974979304	ALDOA, LDHB, LDHA, TALDO1, ADPGK, MAOA, PGD, HK1, BPGM, OGDH, GPI1, HIBADH, GPD1L, PGLS, H6PD, RPIA, MDH2, MDH1	1877	65	13588	2.00470472521618	0.999999999563813	0.13301601023164578	10.396537803935802
no Peak	protein amino acid dephosphorylation	27	0.08762535293544932	0.006061897921588492	PPP6C, CDC14A, SSH2, DUSP10, DUSP11, PTEN, RNGTT, BCL2, PPP3CB, PTPN6, PTPN2, DUSP23, PTPRS, CDC25C, PPP1CB, CDC25A, PTPN12, PTPN11, CDC25B, DUSP5, PPM1F, DUSP4, PPM1D, EYA2, DUSP1, PPM1H, PTP4A2	1877	114	13588	1.7145500939348903	0.9999999997031778	0.13439639708473872	10.572043442359046
no Peak	positive regulation of alpha-beta T cell activation	10	0.03245383442053679	0.006105338745714381	BLM, TGFBR2, IL4RA, RIPK2, ITPKB, CD1D1, CD24A, PNP, CD28, CD1D2, AP3B1	1877	26	13588	2.784312118355805	0.9999999997464808	0.13447201038982448	10.643841917255958
no Peak	cellular carbohydrate catabolic process	17	0.05517151851491253	0.0061427966985109425	ALDOA, LDHB, LDHA, TALDO1, ADPGK, PGD, HK1, BPGM, OGDH, GPI1, HIBADH, GPD1L, PGLS, H6PD, RPIA, MDH2, MDH1	1877	60	13588	2.0511099271887763	0.9999999997787135	0.134424604490197	10.705708206596842
no Peak	positive regulation of transcription	86	0.2791029760166164	0.006426552363451042	ENY2, ELF1, CHURC1, ELF4, STAT5B, FOXO1, ZEB1, CNOT7, MED21, RFXANK, TGFB1, CITED2, ZBTB38, FOS, EPC1, MLL5, MYD88, GATA3, SERTAD3, RARA, MYC, TOP2A, SERTAD2, MYST3, EGR1, ATF7IP, BRF1, MECP2, TTF1, LEF1, TOPORS, AHR, PRPF6, MED6, ADRB2, NCOA2, PRDM9, EP300, ZMIZ2, ZMIZ1, JUN, VEGFA, NFE2L2, ABLIM1, HMGB2, CNBP, ING2, UBE3A, SOX4, AHCTF1, NUFIP1, NFYC, NFYB, NFYA, CALCOCO1, REL, ZSCAN21, NFAT5, R…	1877	475	13588	1.3106782940302273	0.9999999999210201	0.13935770099404576	11.173050815683261
no Peak	T cell homeostasis	8	0.025963067536429428	0.007474036031029407	CASP3, BCL2, STAT5B, PPP3CB, FAS, BCL2L11, TGFB1, ZC3H8	1877	18	13588	3.217427336766708	0.9999999999982433	0.15929147469474425	12.878295757084013
no Peak	oxidative phosphorylation	16	0.051926135072858856	0.007506365357309549	MSH2, NDUFA7, NDUFC2, ATP5F1, MECP2, ATP6V1H, ATP6V1D, ATP6V1C1, ATP6V1A, ATP6V0E, FXN, UQCRH, ATP5C1, ATP5O, ATP5J, UQCRB	1877	56	13588	2.068346145064312	0.9999999999984381	0.15899162688373303	12.930430392463554
no Peak	protein targeting	30	0.09736150326161036	0.0075724523174384275	PACS1, NXT1, XPO1, GRPEL2, GRPEL1, AKAP12, PML, NFKBIA, POLA2, SRP19, TGFB1, PEX7, SPNB2, TRAK1, PEX13, TNPO1, HSPA9, AP3B1, RAB27A, SNUPN, IPO9, IPO8, MFN2, YWHAG, ERBB2IP, YWHAQ, JAK2, KPNA4, SRP9, TOB1	1877	133	13588	1.632904851366562	0.9999999999987716	0.15934871057521383	13.036911194201096
no Peak	NADP metabolic process	7	0.02271768409437575	0.007644952608562041	PGLS, TALDO1, H6PD, PGD, G6PDX, RPIA, HIBADH	1877	14	13588	3.6196057538625466	0.9999999999990563	0.15982445992557437	13.15358365789182
no Peak	amino acid activation	14	0.0454353681887515	0.0077145099030300965	CARS, VARS2, DARS, NARS, FARS2, F13A1, SARS, GARS, LARS2, EARS2, IARS, TARS, NARS2, MARS2	1877	46	13588	2.203238284959811	0.9999999999992671	0.1602379373314753	13.265380913096703
no Peak	tRNA aminoacylation	14	0.0454353681887515	0.0077145099030300965	CARS, VARS2, DARS, NARS, FARS2, F13A1, SARS, GARS, LARS2, EARS2, IARS, TARS, NARS2, MARS2	1877	46	13588	2.203238284959811	0.9999999999992671	0.1602379373314753	13.265380913096703
no Peak	tRNA aminoacylation for protein translation	14	0.0454353681887515	0.0077145099030300965	CARS, VARS2, DARS, NARS, FARS2, F13A1, SARS, GARS, LARS2, EARS2, IARS, TARS, NARS2, MARS2	1877	46	13588	2.203238284959811	0.9999999999992671	0.1602379373314753	13.265380913096703
no Peak	aerobic respiration	10	0.03245383442053679	0.008056151401167244	SDHA, FXN, ACO1, COX10, SDHD, IDH1, CAT, FH1, MDH2, MDH1	1877	27	13588	2.68118944730559	0.9999999999997885	0.16578907601097936	13.812517697096027
no Peak	cytokinesis	10	0.03245383442053679	0.008056151401167244	ROCK1, INCENP, CNTROB, AHCTF1, NUSAP1, BIRC5, ANLN, AURKB, MYH9, APC	1877	27	13588	2.68118944730559	0.9999999999997885	0.16578907601097936	13.812517697096027
no Peak	ribonucleotide biosynthetic process	26	0.08437996949339564	0.008287591213287412	ATP1B3, ATP10A, PNP, ATP6V0E, DHODH, ATP8B2, ATP5O, IMPDH1, ATP5J, ADAL, ATP5F1, ATP6V1H, ATP1A1, ATP11C, GMPS, ATP6V1D, GART, AMPD1, ATP7A, ATP6V1C1, ATP6V1A, ATP2A3, ATP5C1, PRPS2, PRPS1, ATP8A1	1877	111	13588	1.6956711639716433	0.9999999999999089	0.16918411166555092	14.181311079704074
no Peak	regulation of transcription from RNA polymerase II promoter	107	0.3472560282997436	0.008473300007166952	STAT5B, CBX4, FOXO1, MED22, MED21, CNOT7, TGFB1, CITED2, EPC1, MYD88, GATA3, TRAK1, MED27, RARA, SUPT5H, RBL1, GABPA, ZHX2, HES6, MED10, AHR, SUZ12, EP300, PRDM9, JUN, VEGFA, SMARCAL1, TGIF1, SMARCA4, HMGB2, CNBP, SOX4, TXN1, HEXIM1, SKIL, TCF4, RUNX1, BCOR, KLF6, DNMT3A, EHMT1, RFX5, SMAD5, CREBBP, SMAD4, NR4A1, BRIP1, SMAD3, SKI, NR4A3, ZFP148, FOXP4, SREBF2, ATF5, HIVEP1, TCF12, NCOR1, CHURC1,…	1877	616	13588	1.2574604404652354	0.9999999999999536	0.17167969965639807	14.476153695518413
no Peak	T cell differentiation in the thymus	11	0.03569921786259046	0.00880819026079112	DOCK2, BCL2, STAT5B, ITPKB, LIG4, FAS, CD1D1, H2-DMA, SPN, CD28, CD1D2, APC	1877	32	13588	2.4884789557805007	0.9999999999999863	0.17686796257573512	15.005426354086815
no Peak	centrosome cycle	5	0.016226917210268393	0.008949887197826141	KIF11, CNTROB, NPM1, GADD45A, BRCA1	1877	7	13588	5.1708653626607815	0.9999999999999918	0.17846868749765532	15.228435527994
no Peak	positive regulation of gene expression	87	0.28234835945867004	0.009114065595872096	ENY2, ELF1, CHURC1, ELF4, STAT5B, FOXO1, CTCF, ZEB1, CNOT7, MED21, RFXANK, TGFB1, CITED2, ZBTB38, FOS, EPC1, MLL5, MYD88, GATA3, SERTAD3, RARA, MYC, TOP2A, SERTAD2, MYST3, EGR1, ATF7IP, BRF1, MECP2, TTF1, LEF1, TOPORS, AHR, PRPF6, MED6, ADRB2, NCOA2, PRDM9, EP300, ZMIZ2, ZMIZ1, JUN, VEGFA, NFE2L2, ABLIM1, HMGB2, CNBP, ING2, UBE3A, SOX4, AHCTF1, NUFIP1, NFYC, NFYB, NFYA, CALCOCO1, REL, ZSCAN21, NF…	1877	488	13588	1.2905971335493507	0.9999999999999954	0.18045167098364512	15.48613511646587
no Peak	cofactor metabolic process	38	0.12332457079803978	0.00927068894161563	TALDO1, HMGCR, COX10, EHHADH, PGD, G6PDX, UROS, ACOT2, NFS1, PPCDC, HIBADH, MTHFD1, TPK1, CBR1, ACSS1, GPHN, FXN, IDH1, RPIA, FH1, ACO1, MTHFSD, GSTT2, ACLY, COQ7, SDHA, ISCA1, DBT, NFU1, ISCU, PGLS, H6PD, SDHD, MTR, SCP2, MDH2, GSTP1, MDH1	1877	182	13588	1.5114837213931513	0.9999999999999974	0.18227197791676775	15.731285501844106
no Peak	alpha-beta T cell activation	9	0.029208450978483107	0.00928257832913178	ATP7A, DOCK2, BLM, H2-M3, ELF4, BCL2, GADD45G, IRF1, NCOR1	1877	23	13588	2.832734937805471	0.9999999999999976	0.18150291850632072	15.749867553408803
no Peak	negative regulation of T cell activation	13	0.04218998474669782	0.009378271283339063	PTPN6, IL4RA, CD24A, TGFB1, ZC3H8, CASP3, CBLB, IL20RB, CD274, ITCH, SPN, PAG1, RC3H1	1877	42	13588	2.2407083238196717	0.9999999999999983	0.18222049107853322	15.899286074838592
no Peak	negative regulation of fatty acid metabolic process	4	0.012981533768214714	0.009425177106275322	WDTC1, INSIG2, INSIG1, BRCA1	1877	4	13588	7.239211507725092	0.9999999999999986	0.18207462418433207	15.972435015204244
no Peak	negative regulation of fatty acid biosynthetic process	4	0.012981533768214714	0.009425177106275322	WDTC1, INSIG2, INSIG1, BRCA1	1877	4	13588	7.239211507725092	0.9999999999999986	0.18207462418433207	15.972435015204244
no Peak	ribonucleoside monophosphate metabolic process	8	0.025963067536429428	0.010446191810924078	ADAL, DHODH, IMPDH1, GMPS, PRPS2, GART, AMPD1, PRPS1	1877	19	13588	3.0480890558842497	1.0	0.19873843232049637	17.549863965378563
no Peak	spindle organization	10	0.03245383442053679	0.010446697379338506	PCNT, TPX2, MLH1, RANBP1, STMN1, MYH9, CEP63, TACC3, SMC3, TACC2	1877	28	13588	2.5854326813303907	1.0	0.19771419227457476	17.550638067166602
no Peak	nucleobase, nucleoside, nucleotide and nucleic acid transport	19	0.06166228539901989	0.010486905603335568	NXT1, ENY2, XPO1, NUP160, MYO1C, SLC25A4, CKAP5, REFBP2, FMR1, G3BP2, AHCTF1, NUPL1, SLC29A1, TMEM48, NUP210, NPM1, NUP107, THOC5, LRPPRC	1877	74	13588	1.8587164681996862	1.0	0.19737240788017385	17.612180943122937
no Peak	positive regulation of macromolecule biosynthetic process	93	0.3018206601109921	0.010791927472150398	ENY2, ELF1, CHURC1, ELF4, STAT5B, FOXO1, ZEB1, CD1D1, CNOT7, MED21, RFXANK, TGFB1, CD1D2, CITED2, ZBTB38, EPC1, FOS, MLL5, MYD88, GATA3, WIBG, SERTAD3, RARA, MYC, TOP2A, SPN, EIF2B5, SERTAD2, MYST3, EGR1, ATF7IP, BRF1, MECP2, LEF1, TTF1, TOPORS, AHR, PRPF6, MED6, PRKCQ, ADRB2, NCOA2, PRDM9, EP300, ZMIZ2, ZMIZ1, JUN, VEGFA, NFE2L2, ABLIM1, HMGB2, CNBP, ING2, UBE3A, SOX4, AHCTF1, NUFIP1, NFYC, NFYB…	1877	530	13588	1.2702767362611957	1.0	0.2014787441487753	18.077636052650302
no Peak	ribonucleotide metabolic process	28	0.090870736377503	0.01102326591568877	ATP1B3, FIGNL1, ATP10A, PNP, CANT1, ATP6V0E, DHODH, ATP8B2, ATP5O, IMPDH1, ATP5J, ADAL, ATP5F1, ATP6V1H, ATP1A1, ATP11C, GMPS, ATP6V1D, GART, AMPD1, ATP7A, ATP6V1C1, ATP6V1A, ATP2A3, ATP5C1, PRPS2, PRPS1, ATP8A1	1877	125	13588	1.621583377730421	1.0	0.20429769309413792	18.428992989354875
no Peak	maintenance of location	11	0.03569921786259046	0.01110799439549313	FGFR1OP, PXMP3, NUF2, PML, TMSB10, TMSB4X, CENPE, TACC3, SRGN, FLNA, OS9	1877	33	13588	2.413070502575031	1.0	0.20466196369219736	18.55732175799798
no Peak	regulation of T cell mediated cytotoxicity	6	0.01947230065232207	0.011181415171021813	H2-K1, H2-M3, TAP2, PPP3CB, CD1D1, PNP, CD1D2	1877	11	13588	3.9486608223955053	1.0	0.20483673747957654	18.668369600090795
no Peak	regulation of T cell receptor signaling pathway	6	0.01947230065232207	0.011181415171021813	PTPN6, ELF1, CBLB, MALT1, UBASH3A, TRAT1	1877	11	13588	3.9486608223955053	1.0	0.20483673747957654	18.668369600090795
no Peak	thymic T cell selection	7	0.02271768409437575	0.011273673752749902	DOCK2, ITPKB, FAS, CD1D1, H2-DMA, SPN, CD28, CD1D2	1877	15	13588	3.3782987036050436	1.0	0.20531655354845513	18.80770636248571
no Peak	spliceosome assembly	7	0.02271768409437575	0.011273673752749902	SRPK2, TDRD3, SLU7, PTBP2, GEMIN6, SIP1, SMNDC1	1877	15	13588	3.3782987036050436	1.0	0.20531655354845513	18.80770636248571
no Peak	negative regulation of apoptosis	47	0.1525330217765229	0.011310443496342552	XRCC5, STAT5B, FOXO1, PNP, CIAPIN1, PTEN, CITED2, MAP3K7, GPX1, CASP3, TSC22D3, ATG5, BAG1, BCL2, FAIM, DNAJC5, GLO1, FAS, PTCRA, MYC, PIK3R1, ANGPTL4, APC, PIK3CG, STAMBP, CFLAR, ZC3HC1, ROCK1, MSH2, TGFBR1, PIM1, MECP2, ADNP, BIRC6, CENPF, BIRC5, LIG4, DAPK1, HRAS1, ATF5, BFAR, YWHAH, CDKN1B, VEGFA, BNIP3L, CFDP1, APIP	1877	239	13588	1.4236106312262737	1.0	0.20489187930380082	18.863176225940126
no Peak	positive regulation of biosynthetic process	97	0.3148021938792068	0.011368092745329697	STAT5B, FOXO1, MED21, CNOT7, TGFB1, CITED2, EPC1, MLL5, MYD88, WIBG, GATA3, RARA, SPN, EIF2B5, MYST3, MECP2, AHR, EP300, PRDM9, JUN, VEGFA, NFE2L2, CNBP, HMGB2, SOX4, AHCTF1, ITGB2, NPM1, RUNX1, TRAF6, KLF6, TAF8, SMAD5, CREBBP, SMAD4, NR4A1, SMAD3, NR4A3, ZFP148, DDX5, ABCG1, SREBF2, RNF6, DCP1A, GTF2F1, ENY2, ELF1, CHURC1, ELF4, ZEB1, CD1D1, RFXANK, CD1D2, ZBTB38, FOS, SERTAD3, TOP2A, MYC, SERT…	1877	557	13588	1.2606885390472784	1.0	0.20480841913569314	18.950072230907832
no Peak	response to radiation	31	0.10060688670366404	0.011619762722939301	APOBEC1, HMGCR, NEK1, PML, PNP, GPX1, ERCC5, CASP3, PDE6D, TRP53BP2, BCL2, CASP7, RNF168, ERCC3, MYC, 1110054O05RIK, BRCC3, MSH2, UBE4B, NF1, MECP2, MBD4, LIG4, UIMC1, RNF8, XPA, ARRB1, BRE, RAD18, DYNLRB1, NHEJ1	1877	143	13588	1.5693395576187266	1.0	0.20783146478863956	19.328390442124878
no Peak	coenzyme metabolic process	31	0.10060688670366404	0.011619762722939301	TALDO1, HMGCR, EHHADH, PGD, G6PDX, ACOT2, NFS1, PPCDC, HIBADH, TPK1, MTHFD1, ACSS1, GPHN, IDH1, RPIA, FH1, ACO1, MTHFSD, GSTT2, ACLY, COQ7, SDHA, DBT, PGLS, H6PD, SDHD, MTR, SCP2, MDH2, GSTP1, MDH1	1877	143	13588	1.5693395576187266	1.0	0.20783146478863956	19.328390442124878
no Peak	positive regulation of cellular biosynthetic process	96	0.3115568104371531	0.01233856233737249	STAT5B, FOXO1, MED21, CNOT7, TGFB1, CITED2, EPC1, MLL5, MYD88, WIBG, GATA3, RARA, SPN, MYST3, EIF2B5, MECP2, AHR, PRDM9, EP300, JUN, VEGFA, NFE2L2, CNBP, HMGB2, AHCTF1, SOX4, ITGB2, NPM1, RUNX1, TRAF6, KLF6, TAF8, SMAD5, CREBBP, SMAD4, SMAD3, NR4A1, ZFP148, NR4A3, DDX5, SREBF2, RNF6, GTF2F1, DCP1A, ENY2, CHURC1, ELF1, ELF4, ZEB1, CD1D1, RFXANK, ZBTB38, CD1D2, FOS, SERTAD3, TOP2A, MYC, SERTAD2, AT…	1877	552	13588	1.2589933056913205	1.0	0.21817423909237954	20.399738768603015
no Peak	regulation of T cell proliferation	16	0.051926135072858856	0.01236594608379998	PTPN6, BLM, STAT5B, PNP, CD24A, TGFB1, PRKCQ, CASP3, CBLB, IL20RB, CD274, RIPK2, ITCH, SPN, CD28, CLEC2I	1877	59	13588	1.9631760020949407	1.0	0.2175498659014179	20.44028614403167
no Peak	cellular respiration	16	0.051926135072858856	0.01236594608379998	ACO1, COX10, NDUFA7, NDUFC2, MECP2, SDHA, FXN, UQCRH, SDHD, SLC37A2, IDH1, FH1, CAT, MDH2, MDH1, UQCRB	1877	59	13588	1.9631760020949407	1.0	0.2175498659014179	20.44028614403167
no Peak	regulation of myeloid leukocyte differentiation	10	0.03245383442053679	0.013332664619153507	ID2, KLF10, NF1, CLEC2D, GNAS, THOC5, RUNX1, PIK3R1, TOB2, APC	1877	29	13588	2.496279830250032	1.0	0.23140770884156225	21.859265053434374
no Peak	negative regulation of immune system process	19	0.06166228539901989	0.013826214668742997	PTPN6, ELF1, IL4RA, CD24A, TGFB1, ZC3H8, GPX1, CBLB, CASP3, IL20RB, CD274, PPP3CB, CLEC2D, UBASH3A, ITCH, FAS, SPN, PAG1, RC3H1	1877	76	13588	1.8098028769312733	1.0	0.2377876031714241	22.57445205977573
no Peak	cellular component disassembly	12	0.03894460130464414	0.013940811885553106	CASP3, NEDD1, NDEL1, KIF18A, TTF1, MTRF1L, LAMC1, STMN1, APAF1, ETF1, MYC, XRN2	1877	39	13588	2.227449694684644	1.0	0.23839286230222434	22.73962336118853
no Peak	positive regulation of RNA metabolic process	75	0.2434037581540259	0.014180374415126618	ENY2, ELF1, CHURC1, ELF4, STAT5B, FOXO1, ZEB1, CNOT7, MED21, RFXANK, TGFB1, CITED2, ZBTB38, FOS, EPC1, MLL5, MYD88, GATA3, RARA, SUPT5H, MYC, TOP2A, SERTAD2, EGR1, ATF7IP, MECP2, TTF1, LEF1, AHR, PRPF6, MED6, ADRB2, NCOA2, PRDM9, EP300, ZMIZ2, ZMIZ1, JUN, VEGFA, NFE2L2, ABLIM1, HMGB2, CNBP, UBE3A, SOX4, NUFIP1, NFYC, NFYB, NFYA, CALCOCO1, REL, ZSCAN21, NFAT5, RUNX1, MYSM1, KLF6, TAF8, CREBBP, SMA…	1877	419	13588	1.295801582528358	1.0	0.24085023928354532	23.083834052293106
no Peak	negative regulation of DNA metabolic process	8	0.025963067536429428	0.014191778356137892	CLSPN, BLM, MSH2, GMNN, MLH1, TTF1, RAD18, POT1B	1877	20	13588	2.8956846030900367	1.0	0.23990548483812468	23.100183368150162
no Peak	negative regulation of cellular component organization	22	0.07139843572518093	0.014277697861920395	ARHGEF2, NRP1, CAPZA2, CAPZA1, MECP2, CENPE, TMSB10, PTEN, TGFB1, RNF6, MAD2L1BP, YWHAH, MAD2L1, PSEN1, ULK1, SPNB2, ULK2, TMOD3, TMSB4X, CLASP1, STMN1, APC	1877	93	13588	1.7125016469887318	1.0	0.24006698390705317	23.22325668515487
no Peak	anti-apoptosis	21	0.06815305228312725	0.015422757279880524	STAMBP, CFLAR, ZC3HC1, STAT5B, BIRC6, FOXO1, BIRC5, CIAPIN1, DAPK1, CITED2, ATF5, BFAR, TSC22D3, BAG1, BCL2, BNIP3L, VEGFA, GLO1, CFDP1, FAIM, MYC	1877	88	13588	1.7275391097980337	1.0	0.25558154897792307	24.845790173345804
no Peak	nucleic acid transport	17	0.05517151851491253	0.01577446358806047	NXT1, ENY2, XPO1, NUP160, MYO1C, CKAP5, REFBP2, FMR1, G3BP2, AHCTF1, NUPL1, TMEM48, NUP210, NPM1, NUP107, THOC5, LRPPRC	1877	66	13588	1.8646453883534333	1.0	0.25944523846272793	25.337608188944504
no Peak	positive regulation of T cell activation	17	0.05517151851491253	0.01577446358806047	BLM, IL4RA, TGFBR2, STAT5B, ITPKB, MALT1, CD1D1, PNP, CD24A, CD1D2, PRKCQ, RIPK2, HSPD1, H2-DMA, CD5, SPN, CD28, AP3B1	1877	66	13588	1.8646453883534333	1.0	0.25944523846272793	25.337608188944504
no Peak	RNA transport	17	0.05517151851491253	0.01577446358806047	NXT1, ENY2, XPO1, NUP160, MYO1C, CKAP5, REFBP2, FMR1, G3BP2, AHCTF1, NUPL1, TMEM48, NUP210, NPM1, NUP107, THOC5, LRPPRC	1877	66	13588	1.8646453883534333	1.0	0.25944523846272793	25.337608188944504
no Peak	establishment of RNA localization	17	0.05517151851491253	0.01577446358806047	NXT1, ENY2, XPO1, NUP160, MYO1C, CKAP5, REFBP2, FMR1, G3BP2, AHCTF1, NUPL1, TMEM48, NUP210, NPM1, NUP107, THOC5, LRPPRC	1877	66	13588	1.8646453883534333	1.0	0.25944523846272793	25.337608188944504
no Peak	apoptotic mitochondrial changes	9	0.029208450978483107	0.015910654636908363	ATP7A, CASP3, SH3GLB1, CASP7, MAP3K1, BCL2, CD24A, MYC, DAP3	1877	25	13588	2.6061161427810338	1.0	0.260212131426383	25.527235938317716
no Peak	histone methylation	9	0.029208450978483107	0.015910654636908363	SUZ12, MLL5, EHMT1, PRDM9, EZH2, PRMT6, EED, MECP2, SUV420H1	1877	25	13588	2.6061161427810338	1.0	0.260212131426383	25.527235938317716
no Peak	spindle checkpoint	5	0.016226917210268393	0.015957370064203634	MAD2L1BP, MAD2L1, CENPE, BIRC5, APC	1877	8	13588	4.524507192328183	1.0	0.25971322595262825	25.59217593463853
no Peak	chromosome localization	5	0.016226917210268393	0.015957370064203634	CCDC99, KIF18A, MLH1, CENPF, BIRC5	1877	8	13588	4.524507192328183	1.0	0.25971322595262825	25.59217593463853
no Peak	deoxyribonucleotide biosynthetic process	5	0.016226917210268393	0.015957370064203634	TYMS, RRM2, ADK, DTYMK, RRM2B	1877	8	13588	4.524507192328183	1.0	0.25971322595262825	25.59217593463853
no Peak	establishment of chromosome localization	5	0.016226917210268393	0.015957370064203634	CCDC99, KIF18A, MLH1, CENPF, BIRC5	1877	8	13588	4.524507192328183	1.0	0.25971322595262825	25.59217593463853
no Peak	aspartate family amino acid biosynthetic process	7	0.02271768409437575	0.01596684293607026	GOT2, ADI1, MTHFD1, MTHFR, GOT1, MTR, THNSL1	1877	16	13588	3.167155034629728	1.0	0.25869755428007535	25.605337820917818
no Peak	negative regulation of programmed cell death	47	0.1525330217765229	0.01618518042740802	XRCC5, STAT5B, FOXO1, PNP, CIAPIN1, PTEN, CITED2, MAP3K7, GPX1, CASP3, TSC22D3, ATG5, BAG1, BCL2, FAIM, DNAJC5, GLO1, FAS, PTCRA, MYC, PIK3R1, ANGPTL4, APC, PIK3CG, STAMBP, CFLAR, ZC3HC1, ROCK1, MSH2, TGFBR1, PIM1, MECP2, ADNP, BIRC6, CENPF, BIRC5, LIG4, DAPK1, HRAS1, ATF5, BFAR, YWHAH, CDKN1B, VEGFA, BNIP3L, CFDP1, APIP	1877	244	13588	1.3944382822257353	1.0	0.2606007715105696	25.908092906874835
no Peak	positive regulation of binding	13	0.04218998474669782	0.016481876488664705	HMGB2, CREBBP, ITGB2, MALT1, TGFB1, PRKCQ, MYD88, HIPK3, RIPK2, CALM3, BRD4, CAT, EIF2AK3, CALM1	1877	45	13588	2.0913277688983603	1.0	0.2635612426530529	26.317636123049958
no Peak	cytoskeleton organization	60	0.19472300652322072	0.016558843400561664	MTSS1, MAEA, CAPZA2, CAPZA1, MLH1, HOOK1, RANBP1, TUBA1B, ARHGEF2, KIF11, ROCK1, TRPM7, TPX2, ACTN1, NUSAP1, TMSB10, MYH9, TACC3, WAS, LPIN1, FLNA, TACC1, VASP, TACC2, ELMO1, NCK2, CAPN10, NDEL1, NCK1, FGFR1OP, CNTROB, TMSB4X, STMN1, AKAP2, GADD45A, LCP1, ABLIM1, CCDC99, TUBGCP6, DOCK2, TUBGCP5, RAC2, BCL2, NPM1, CKAP5, PCNT, NF1, NUF2, KIF18A, CENPE, BIRC5, CEP63, BRCA1, SMC3, NEDD1, YWHAH, SVIL…	1877	326	13588	1.3323702161457227	1.0	0.26347313436899145	26.42352688839119
no Peak	positive regulation of transcription, DNA-dependent	74	0.2401583747119722	0.017000331058179545	ENY2, ELF1, CHURC1, ELF4, STAT5B, FOXO1, ZEB1, CNOT7, MED21, RFXANK, TGFB1, CITED2, ZBTB38, FOS, EPC1, MLL5, MYD88, GATA3, RARA, MYC, TOP2A, SERTAD2, EGR1, ATF7IP, MECP2, TTF1, LEF1, AHR, PRPF6, MED6, ADRB2, NCOA2, PRDM9, EP300, ZMIZ2, ZMIZ1, JUN, VEGFA, NFE2L2, ABLIM1, HMGB2, CNBP, UBE3A, SOX4, NUFIP1, NFYC, NFYB, NFYA, CALCOCO1, REL, ZSCAN21, NFAT5, RUNX1, MYSM1, KLF6, TAF8, CREBBP, SMAD5, SMAD…	1877	416	13588	1.28774435473956	1.0	0.2683457798668045	27.028149223850505
no Peak	negative regulation of cell death	47	0.1525330217765229	0.017340134847014632	XRCC5, STAT5B, FOXO1, PNP, CIAPIN1, PTEN, CITED2, MAP3K7, GPX1, CASP3, TSC22D3, ATG5, BAG1, BCL2, FAIM, DNAJC5, GLO1, FAS, PTCRA, MYC, PIK3R1, ANGPTL4, APC, PIK3CG, STAMBP, CFLAR, ZC3HC1, ROCK1, MSH2, TGFBR1, PIM1, MECP2, ADNP, BIRC6, CENPF, BIRC5, LIG4, DAPK1, HRAS1, ATF5, BFAR, YWHAH, CDKN1B, VEGFA, BNIP3L, CFDP1, APIP	1877	245	13588	1.388746697400324	1.0	0.2717753280408267	27.490311457778795
no Peak	regulation of adaptive immune response based on somatic recombination of immune receptors built from immunoglobulin superfamily domains	15	0.04868075163080518	0.01776388931645002	H2-K1, PTPN6, H2-M3, IL4RA, CENPF, CD1D1, PNP, CD24A, TGFB1, CD1D2, IL20RB, TAP2, PPP3CB, RIPK2, SPN, CD28	1877	56	13588	1.9390745109977927	1.0	0.276273007249475	28.062776309798842
no Peak	regulation of adaptive immune response	15	0.04868075163080518	0.01776388931645002	H2-K1, PTPN6, H2-M3, IL4RA, CENPF, CD1D1, PNP, CD24A, TGFB1, CD1D2, IL20RB, TAP2, PPP3CB, RIPK2, SPN, CD28	1877	56	13588	1.9390745109977927	1.0	0.276273007249475	28.062776309798842
no Peak	RNA localization	17	0.05517151851491253	0.01814473098172486	NXT1, ENY2, XPO1, NUP160, MYO1C, CKAP5, REFBP2, FMR1, G3BP2, AHCTF1, NUPL1, TMEM48, NUP210, NPM1, NUP107, THOC5, LRPPRC	1877	67	13588	1.8368148601690535	1.0	0.28013642469202116	28.573619896895963
no Peak	regulation of organelle organization	32	0.10385227014571771	0.0185011391456648	XPO1, CAPZA2, CAPZA1, PML, ANAPC10, CTCF, TGFB1, ARPC3, ARPC2, SPNB2, MAP3K1, NPM1, HECTD3, CLASP1, RANBP1, TLK2, CD28, APC, CLEC2I, ARHGEF2, MECP2, NUSAP1, TMSB10, CENPE, YWHAH, CDKN1B, MAD2L1BP, MAD2L1, TMOD3, TMSB4X, STMN1, NCOR1	1877	154	13588	1.5042517418649544	1.0	0.2836247317244329	29.048580706417148
no Peak	T cell selection	8	0.025963067536429428	0.018805535199185135	DOCK2, BCL2, ITPKB, FAS, CD1D1, H2-DMA, SPN, CD28, CD1D2	1877	21	13588	2.75779486008575	1.0	0.2863916601576115	29.451862468618728
no Peak	homeostasis of number of cells	25	0.08113458605134197	0.01934706626275419	MAEA, STAT5B, G6PDX, TGFB1, ZC3H8, RPA1, MLL5, CASP3, BCL2, PPP3CB, DYRK3, FH1, SKIL, FAS, FANCC, LIPA, SMAD5, BPGM, BCL2L11, PKNOX1, IL20RB, ID2, SP1, VEGFA, NCOR1	1877	113	13588	1.6015954663108614	1.0	0.29215555021334405	30.163961993253206
no Peak	nucleocytoplasmic transport	22	0.07139843572518093	0.020156265374853086	NXT1, XPO1, ADAM10, NUP160, SNUPN, PML, NFKBIA, IPO9, POLA2, IPO8, TGFB1, CAMK4, RSRC1, SPNB2, NPM1, LSG1, JAK2, KPNA4, TNPO1, HSPA9, TOB1, NMD3	1877	96	13588	1.658985970520334	1.0	0.30118851890475096	31.215383924936734
no Peak	myeloid cell differentiation	22	0.07139843572518093	0.020156265374853086	MAEA, TGFBR2, G6PDX, SMAD5, PML, BPGM, OSTM1, PRDX3, MYH9, TGFB1, MLL5, PKNOX1, ID2, PSEN1, SP1, CASP8, VEGFA, JAK2, DYRK3, TRAF6, NCOR1, MYST3	1877	96	13588	1.658985970520334	1.0	0.30118851890475096	31.215383924936734
no Peak	autophagy	10	0.03245383442053679	0.02081025459436636	ATG10, ATG5, ATG12, PSEN1, GOPC, ARSA, CTSD, ATG16L2, ATG3, D2ERTD391E	1877	31	13588	2.3352295186209977	1.0	0.30811011001569755	32.05418040582679
no Peak	regulation of osteoclast differentiation	7	0.02271768409437575	0.02185270053397236	KLF10, NF1, CLEC2D, GNAS, PIK3R1, TOB2, APC	1877	17	13588	2.980851797298568	1.0	0.3196275502249697	33.37123942764886
no Peak	vesicle docking	7	0.02271768409437575	0.02185270053397236	SCFD1, VPS45, EXOC4, STXBP2, EXOC6, EXOC5, STXBP3A	1877	17	13588	2.980851797298568	1.0	0.3196275502249697	33.37123942764886
no Peak	protein complex disassembly	7	0.02271768409437575	0.02185270053397236	NEDD1, KIF18A, TTF1, MTRF1L, STMN1, ETF1, XRN2	1877	17	13588	2.980851797298568	1.0	0.3196275502249697	33.37123942764886
no Peak	cellular protein complex disassembly	7	0.02271768409437575	0.02185270053397236	NEDD1, KIF18A, TTF1, MTRF1L, STMN1, ETF1, XRN2	1877	17	13588	2.980851797298568	1.0	0.3196275502249697	33.37123942764886
no Peak	membrane docking	7	0.02271768409437575	0.02185270053397236	SCFD1, VPS45, EXOC4, STXBP2, EXOC6, EXOC5, STXBP3A	1877	17	13588	2.980851797298568	1.0	0.3196275502249697	33.37123942764886
no Peak	negative regulation of lymphocyte activation	14	0.0454353681887515	0.02189090973373555	PTPN6, IL4RA, CD24A, TGFB1, ZC3H8, CASP3, CBLB, IL20RB, CD274, FAS, ITCH, SPN, PAG1, RC3H1	1877	52	13588	1.9490184828490635	1.0	0.3188283845846718	33.41905244258875
no Peak	regulation of lymphocyte differentiation	15	0.04868075163080518	0.023861647994217663	PTPN6, IL4RA, TGFBR2, STAT5B, ITPKB, ZEB1, CD1D1, PNP, CD24A, CD1D2, ZC3H8, RIPK2, FAS, H2-DMA, RC3H1, AP3B1	1877	58	13588	1.872209872687524	1.0	0.34092743547375104	35.84161060134938
no Peak	cellular response to hormone stimulus	15	0.04868075163080518	0.023861647994217663	WDTC1, IRS2, PTPN2, STAT5B, ADIPOR1, FOXO1, PDE3B, LPIN1, PTPN11, PHIP, CAPN10, JAK2, INSR, PIK3R1, AKT2	1877	58	13588	1.872209872687524	1.0	0.34092743547375104	35.84161060134938
no Peak	RNA modification	12	0.03894460130464414	0.024156596760089424	PUS7L, URM1, RPUSD4, APOBEC1, QTRTD1, TFB2M, CDKAL1, TGS1, TRUB1, CDK5RAP1, TRUB2, FTSJ2	1877	42	13588	2.068346145064312	1.0	0.34303757654415845	36.1969284379678
no Peak	regulation of intracellular transport	12	0.03894460130464414	0.024156596760089424	KHDRBS1, CAPN10, NF1, SMAD4, CENPF, TXN1, TACC3, MBTPS1, LCP1, TGFB1, FLNA, PTPN11	1877	42	13588	2.068346145064312	1.0	0.34303757654415845	36.1969284379678
no Peak	positive regulation of DNA binding	12	0.03894460130464414	0.024156596760089424	HMGB2, CREBBP, ITGB2, MALT1, TGFB1, PRKCQ, MYD88, HIPK3, RIPK2, CALM3, BRD4, CAT, CALM1	1877	42	13588	2.068346145064312	1.0	0.34303757654415845	36.1969284379678
no Peak	negative regulation of gene expression, epigenetic	8	0.025963067536429428	0.024374962380575224	EPC1, DNMT3A, MECP2, SIRT4, SMARCA5, MBD3, CBX8, SMARCA4	1877	22	13588	2.63244054826367	1.0	0.3442424424684295	36.45878874714621
no Peak	regulation of alpha-beta T cell differentiation	8	0.025963067536429428	0.024374962380575224	TGFBR2, IL4RA, RIPK2, ITPKB, CD1D1, PNP, RC3H1, CD1D2, AP3B1	1877	22	13588	2.63244054826367	1.0	0.3442424424684295	36.45878874714621
no Peak	aspartate family amino acid metabolic process	8	0.025963067536429428	0.024374962380575224	GOT2, ADI1, MTHFD1, MTHFR, GOT1, MTR, PHGDH, THNSL1	1877	22	13588	2.63244054826367	1.0	0.3442424424684295	36.45878874714621
no Peak	regulation of lipid biosynthetic process	8	0.025963067536429428	0.024374962380575224	WDTC1, INSIG2, PXMP3, INSIG1, ATP1A1, NR3C1, ABCG1, BRCA1	1877	22	13588	2.63244054826367	1.0	0.3442424424684295	36.45878874714621
no Peak	positive regulation of T cell mediated immunity	6	0.01947230065232207	0.024568917916938576	H2-K1, H2-M3, TAP2, CD1D1, CD24A, PNP, CD1D2	1877	13	13588	3.341174542026966	1.0	0.3451554816066974	36.69052440425589
no Peak	regulation of antigen receptor-mediated signaling pathway	6	0.01947230065232207	0.024568917916938576	PTPN6, ELF1, CBLB, MALT1, UBASH3A, TRAT1	1877	13	13588	3.341174542026966	1.0	0.3451554816066974	36.69052440425589
no Peak	energy derivation by oxidation of organic compounds	22	0.07139843572518093	0.025014433339823762	ACO1, COX10, NDUFA7, NDUFC2, MECP2, PPP1CB, SDHA, GOT1, GBE1, PPP1R3B, FXN, UQCRH, SDHD, SLC37A2, IDH1, GNAS, FH1, CAT, AGL, MDH2, MDH1, UQCRB	1877	98	13588	1.6251291139791026	1.0	0.34891057069154363	37.21979825866346
no Peak	nuclear transport	22	0.07139843572518093	0.025014433339823762	NXT1, XPO1, ADAM10, NUP160, SNUPN, PML, NFKBIA, IPO9, POLA2, IPO8, TGFB1, CAMK4, RSRC1, SPNB2, NPM1, LSG1, JAK2, KPNA4, TNPO1, HSPA9, TOB1, NMD3	1877	98	13588	1.6251291139791026	1.0	0.34891057069154363	37.21979825866346
no Peak	negative regulation of cell activation	14	0.0454353681887515	0.02545327986215592	PTPN6, IL4RA, CD24A, TGFB1, ZC3H8, CASP3, CBLB, IL20RB, CD274, FAS, ITCH, SPN, PAG1, RC3H1	1877	53	13588	1.9122445492104019	1.0	0.3525369164269443	37.73705689420541
no Peak	negative regulation of leukocyte activation	14	0.0454353681887515	0.02545327986215592	PTPN6, IL4RA, CD24A, TGFB1, ZC3H8, CASP3, CBLB, IL20RB, CD274, FAS, ITCH, SPN, PAG1, RC3H1	1877	53	13588	1.9122445492104019	1.0	0.3525369164269443	37.73705689420541
no Peak	negative regulation of DNA recombination	5	0.016226917210268393	0.02562377470691711	BLM, MSH2, MLH1, RAD18, POT1B	1877	9	13588	4.0217841709583855	1.0	0.35312861846956545	37.93692630528484
no Peak	negative regulation of cyclin-dependent protein kinase activity	5	0.016226917210268393	0.02562377470691711	CASP3, CDKN1B, HEXIM1, CDK5RAP1, APC	1877	9	13588	4.0217841709583855	1.0	0.35312861846956545	37.93692630528484
no Peak	positive regulation of T cell mediated cytotoxicity	5	0.016226917210268393	0.02562377470691711	H2-K1, H2-M3, TAP2, CD1D1, PNP, CD1D2	1877	9	13588	4.0217841709583855	1.0	0.35312861846956545	37.93692630528484
no Peak	carbohydrate catabolic process	19	0.06166228539901989	0.025833050960167435	ALDOA, LDHB, LDHA, TALDO1, GM2A, ADPGK, PGD, HK1, BPGM, OGDH, GPI1, HIBADH, GPD1L, AKR1A4, PGLS, H6PD, RPIA, MDH2, MDH1	1877	81	13588	1.698086649960207	1.0	0.3541442489312959	38.181429433631855
no Peak	glucose metabolic process	29	0.09411611981955667	0.026233099731409887	ALDOA, LDHB, LDHA, TALDO1, ADPGK, PGD, G6PDX, HK1, OGDH, GPI1, HIBADH, ACN9, PPP1R3B, RPIA, MYC, AGL, PDK1, WDTC1, PDK3, BPGM, PPP1CB, PGM2L1, PGLS, GBE1, H6PD, MAPK14, FABP5, MDH2, MDH1	1877	140	13588	1.4995509551716266	1.0	0.35724633779443093	38.646284731303695
no Peak	transforming growth factor beta receptor signaling pathway	13	0.04218998474669782	0.027031746882301623	FUT8, TGFBR1, USP9X, TGFBR2, SMAD5, SMAD4, PML, SMAD3, TGFB1, MAP3K7, MAP3K1, DCP1A, SKIL	1877	48	13588	1.9606197833422128	1.0	0.3646287955804651	39.56444186811934
no Peak	cytokine production	12	0.03894460130464414	0.028537229923999836	NFATC2IP, IL12RB2, IRAK4, LIPA, MYD88, REL, GADD45G, G6PDX, IL1RAP, NFAT5, PRKCD, IFNAR1	1877	43	13588	2.0202450719232816	1.0	0.3793490182190622	41.259987378706356
no Peak	protein import into nucleus, translocation	7	0.02271768409437575	0.029042032785288014	SPNB2, PML, NFKBIA, JAK2, POLA2, TGFB1, TOB1	1877	18	13588	2.8152489196708697	1.0	0.3832813995723442	41.81837809721769
no Peak	regulation of protein complex assembly	16	0.051926135072858856	0.029082627498993447	ATF7IP, CAPZA2, CAPZA1, TMSB10, CD24A, AHR, CDKN1B, ARPC3, ARPC2, MAP3K1, SPNB2, TMOD3, TMSB4X, STMN1, APC, CLEC2I	1877	65	13588	1.7819597557477151	1.0	0.38235285324366064	41.86306345394391
no Peak	sulfur metabolic process	21	0.06815305228312725	0.030284915835190412	AHCY, G6PDX, STAT5B, NFS1, GSTT2, HS2ST1, TPK1, MTHFD1, ADI1, MTHFR, CSAD, MTR, PHGDH, IDH1, HS6ST1, MAT2B, SEPP1, EXT1, PAPSS1, PAPSS2, GSTP1	1877	94	13588	1.6172706559811378	1.0	0.393351152812753	43.17188541951074
no Peak	posttranscriptional regulation of gene expression	30	0.09736150326161036	0.030845086263593034	EIF4E3, APOBEC1, IMPACT, RBM3, SOX4, MKNK1, EIF2A, PTEN, ZFP36L1, CLP1, SND1, TIA1, BCL2, WIBG, PUM2, TNRC6B, EIF2B5, BRF1, ACO1, CCDC88C, IPO9, ANKHD1, FLNA, EIF4G2, EIF4E, VEGFA, NGDN, EIF2AK3, EIF4E2, SRP9	1877	148	13588	1.4674077380523836	1.0	0.3976477301898913	43.77213114302426
no Peak	DNA integrity checkpoint	10	0.03245383442053679	0.03090623460928676	CLSPN, BRCC3, MSH2, MAPK14, BRE, PML, CHEK1, CEP63, UIMC1, PTPN11	1877	33	13588	2.193700456886392	1.0	0.3968963095903174	43.83728995811895
no Peak	sulfur amino acid metabolic process	8	0.025963067536429428	0.030977880403973736	ADI1, MTHFD1, MTHFR, AHCY, CSAD, MTR, NFS1, MAT2B	1877	23	13588	2.517986611382641	1.0	0.39625556914832205	43.91354386909827
no Peak	deoxyribonucleotide metabolic process	8	0.025963067536429428	0.030977880403973736	TYMS, RRM2, ADK, DTYMK, DERA, DGUOK, RRM2B, PNP	1877	23	13588	2.517986611382641	1.0	0.39625556914832205	43.91354386909827
no Peak	regulation of cellular ketone metabolic process	8	0.025963067536429428	0.030977880403973736	ANKRD26, WDTC1, INSIG2, INSIG1, NR3C1, ACSL4, EIF2AK3, BRCA1	1877	23	13588	2.517986611382641	1.0	0.39625556914832205	43.91354386909827
no Peak	negative regulation of T cell proliferation	9	0.029208450978483107	0.031396224024390254	PTPN6, CASP3, CBLB, IL20RB, CD274, ITCH, CD24A, TGFB1, SPN	1877	28	13588	2.3268894131973514	1.0	0.39906302630047163	44.35684347432986
no Peak	T cell activation during immune response	6	0.01947230065232207	0.033971120865945996	ATP7A, PSEN1, H2-M3, GADD45G, LCP1, RAB27A	1877	14	13588	3.1025192175964684	1.0	0.4226639133867074	47.01323781092322
no Peak	positive regulation of DNA repair	6	0.01947230065232207	0.033971120865945996	RNF8, BRCC3, BRE, RNF168, PNP, UIMC1	1877	14	13588	3.1025192175964684	1.0	0.4226639133867074	47.01323781092322
no Peak	regulation of alpha-beta T cell proliferation	6	0.01947230065232207	0.033971120865945996	CBLB, BLM, RIPK2, ITCH, CD24A, CD28	1877	14	13588	3.1025192175964684	1.0	0.4226639133867074	47.01323781092322
no Peak	purine ribonucleotide biosynthetic process	23	0.0746438191672346	0.03414505646567919	ATP1B3, ADAL, ATP10A, ATP5F1, ATP6V1H, ATP1A1, ATP11C, GMPS, PNP, ATP6V1D, GART, AMPD1, ATP6V1C1, ATP7A, ATP6V1A, ATP6V0E, ATP2A3, ATP5C1, ATP8B2, ATP5O, IMPDH1, ATP8A1, ATP5J	1877	107	13588	1.5560921932493192	1.0	0.42291797656671626	47.18828478133551
no Peak	negative regulation of transcription from RNA polymerase II promoter	43	0.1395514880083082	0.03581101677883005	CBX4, TXN1, ZEB1, TGFB1, SAP30, EPC1, HEXIM1, PCGF6, ZFP238, PER1, RARA, SKIL, BCOR, TCF4, MYC, EGR1, ATF7IP, DNMT3A, WDTC1, CTBP1, EHMT1, RFX5, RBL1, GABPA, ZHX2, LEF1, SMAD3, TLE4, SKI, MBD3, MBD2, FOXP4, SUZ12, NCOA2, BPTF, ID2, HIPK3, TGIF1, HIVEP1, ID3, RBM15, NCOR1, SMARCA4	1877	231	13588	1.3475588520873552	1.0	0.437052821420741	48.83741613138298
no Peak	regulation of protein localization	20	0.06490766884107357	0.03666856340578173	NF1, SMAD4, CENPF, RABGAP1L, TXN1, CENPE, ARFIP1, TACC3, TGFB1, FLNA, PTPN11, NEDD1, GAPVD1, BCL2, TRAF6, MBTPS1, LCP1, SRGN, ARHGDIA, APC	1877	90	13588	1.608713668383354	1.0	0.4434673757243426	49.667197182965516
no Peak	regulation of fatty acid metabolic process	7	0.02271768409437575	0.03762472862021782	ANKRD26, WDTC1, INSIG2, INSIG1, ACSL4, EIF2AK3, BRCA1	1877	19	13588	2.6670779238987183	1.0	0.45064099076393216	50.57739404822363
no Peak	positive regulation of alpha-beta T cell differentiation	7	0.02271768409437575	0.03762472862021782	TGFBR2, IL4RA, RIPK2, ITPKB, CD1D1, PNP, CD1D2, AP3B1	1877	19	13588	2.6670779238987183	1.0	0.45064099076393216	50.57739404822363
no Peak	oxidation reduction	110	0.35699217862590465	0.03793113205540186	LDHB, LDHA, HMGCR, EHHADH, PGD, OGDH, HIBADH, TXNL1, QDPR, MECP2, DHRS7B, PYCR2, SLC37A2, RFESD, MDH2, MDH1, HSD17B11, ME2, TXN2, GLUD1, HSD17B12, TXN1, RRM2B, BC003331, GPD1L, IVD, NMRAL1, DHODH, IDH1, MAOA, TXNDC12, DHFR, ALDH2, FOXRED1, CYB5R3, SEPX1, ENOX2, UTY, G6PDX, PRDX5, PRDX3, UQCRFS1, UQCRQ, MTHFD1, NDUFS6, GPX1, NDUFS5, CRYL1, NDUFS4, HIF1AN, P4HA1, CAT, NDUFS3, IMPDH1, SQRDL, CTBP1, …	1877	672	13588	1.1849899789430958	1.0	0.4519415807293522	50.86575867852299
no Peak	signal peptide processing	4	0.012981533768214714	0.03798462896119682	SEC11C, SEC11A, SPCS1, SPCS2	1877	6	13588	4.826141005150062	1.0	0.4509981539207991	50.915942653022974
no Peak	negative regulation of antigen receptor-mediated signaling pathway	4	0.012981533768214714	0.03798462896119682	PTPN6, ELF1, CBLB, UBASH3A	1877	6	13588	4.826141005150062	1.0	0.4509981539207991	50.915942653022974
no Peak	negative regulation of T cell receptor signaling pathway	4	0.012981533768214714	0.03798462896119682	PTPN6, ELF1, CBLB, UBASH3A	1877	6	13588	4.826141005150062	1.0	0.4509981539207991	50.915942653022974
no Peak	SMAD protein nuclear translocation	4	0.012981533768214714	0.03798462896119682	SPNB2, PML, TGFB1, TOB1	1877	6	13588	4.826141005150062	1.0	0.4509981539207991	50.915942653022974
no Peak	metaphase plate congression	4	0.012981533768214714	0.03798462896119682	CCDC99, KIF18A, MLH1, CENPF	1877	6	13588	4.826141005150062	1.0	0.4509981539207991	50.915942653022974
no Peak	positive T cell selection	5	0.016226917210268393	0.03812446685970942	DOCK2, BCL2, ITPKB, CD1D1, H2-DMA, CD1D2	1877	10	13588	3.6196057538625466	1.0	0.45082179058526106	51.04689191008348
no Peak	positive regulation of Ras GTPase activity	5	0.016226917210268393	0.03812446685970942	NDEL1, RALBP1, NF1, ARHGAP27, SCRIB	1877	10	13588	3.6196057538625466	1.0	0.45082179058526106	51.04689191008348
no Peak	metallo-sulfur cluster assembly	5	0.016226917210268393	0.03812446685970942	ISCA1, ISCU, NFU1, FXN, NFS1	1877	10	13588	3.6196057538625466	1.0	0.45082179058526106	51.04689191008348
no Peak	autophagic vacuole formation	5	0.016226917210268393	0.03812446685970942	ATG5, ATG12, PSEN1, CTSD, D2ERTD391E	1877	10	13588	3.6196057538625466	1.0	0.45082179058526106	51.04689191008348
no Peak	negative regulation of lipid metabolic process	5	0.016226917210268393	0.03812446685970942	WDTC1, INSIG2, INSIG1, ATP1A1, BRCA1	1877	10	13588	3.6196057538625466	1.0	0.45082179058526106	51.04689191008348
no Peak	iron-sulfur cluster assembly	5	0.016226917210268393	0.03812446685970942	ISCA1, ISCU, NFU1, FXN, NFS1	1877	10	13588	3.6196057538625466	1.0	0.45082179058526106	51.04689191008348
no Peak	cell aging	9	0.029208450978483107	0.038277579988059904	ZMIZ1, BCL2, NPM1, PML, POT1B, ZFP217, WRN, XRN1, HRAS1	1877	29	13588	2.2466518472250288	1.0	0.45076346138237255	51.189893672650435
no Peak	alkaloid metabolic process	8	0.025963067536429428	0.0386803923673556	PGLS, TALDO1, H6PD, PGD, G6PDX, RPIA, HIBADH, MDH1	1877	24	13588	2.413070502575031	1.0	0.45288249351391385	51.56422074116431
no Peak	nicotinamide metabolic process	8	0.025963067536429428	0.0386803923673556	PGLS, TALDO1, H6PD, PGD, G6PDX, RPIA, HIBADH, MDH1	1877	24	13588	2.413070502575031	1.0	0.45288249351391385	51.56422074116431
no Peak	nicotinamide nucleotide metabolic process	8	0.025963067536429428	0.0386803923673556	PGLS, TALDO1, H6PD, PGD, G6PDX, RPIA, HIBADH, MDH1	1877	24	13588	2.413070502575031	1.0	0.45288249351391385	51.56422074116431
no Peak	mRNA transport	15	0.04868075163080518	0.040521421374998985	ENY2, NXT1, XPO1, NUP160, MYO1C, REFBP2, FMR1, G3BP2, AHCTF1, NUPL1, TMEM48, NUP210, NUP107, THOC5, LRPPRC	1877	62	13588	1.751422138965748	1.0	0.46726427628491474	53.24077032110313
no Peak	DNA replication	30	0.09736150326161036	0.04213173473730819	BLM, WRNIP1, POT1A, POLA2, RRM2B, RPA3, RPA1, TOP1, PRIM2, POLM, POLQ, MYST2, TERF1, POLI, POLH, SSBP1, DTL, LIG4, MCM2, WRN, MCM4, RMI1, MCM5, BRCA1, MCM6, POLD4, RRM2, TOP3A, ORC5L, REV3L	1877	152	13588	1.428791744945742	1.0	0.479282725509821	54.66208294121465
no Peak	response to UV	10	0.03245383442053679	0.04398155583715699	XPA, CASP3, ERCC5, MSH2, CASP7, BCL2, UBE4B, PML, RAD18, ERCC3	1877	35	13588	2.0683461450643126	1.0	0.4928758987493064	56.2443594325998
no Peak	cell cycle arrest	14	0.0454353681887515	0.04401375579150073	TSG101, MSH2, 4632434I11RIK, PML, SESN1, SESN3, MFN2, MLL5, CDKN1B, MTBP, TRP53INP1, SKIL, GADD45A, APC	1877	57	13588	1.7780519492658122	1.0	0.4916965747400225	56.271434157266256

## Sheet: HumanCD4+
Peak Group	Term	Count	%	PValue	Genes	List.Total	Pop.Hits	Pop.Total	Fold.Enrichment	Bonferroni	Benjamini	FDR
RNAP II total no Ser5P	regulation of apoptosis	22	1.075794621026895	9.645926866981279E-5	B4GALT1, PTPRC, BCLAF1, HERPUD1, PIM1, PIM3, SAP30BP, SIRT1, NLRP1, NFKBIL1, CITED2, HIPK1, CD44, BCL11B, BAG3, MTCH1, DAD1, SEMA4D, INPP5D, CLN8, FGD3, HSPA9	143	804	13528	2.588595484117872	0.13337806549708475	0.13337806549708475	0.1599423635927577
RNAP II total no Ser5P	regulation of programmed cell death	22	1.075794621026895	1.1088101515285554E-4	B4GALT1, PTPRC, BCLAF1, HERPUD1, PIM1, PIM3, SAP30BP, SIRT1, NLRP1, NFKBIL1, CITED2, HIPK1, CD44, BCL11B, BAG3, MTCH1, DAD1, SEMA4D, INPP5D, CLN8, FGD3, HSPA9	143	812	13528	2.56309208033346	0.15173021385986019	0.07898437247778489	0.18383487904733986
RNAP II total no Ser5P	regulation of cell death	22	1.075794621026895	1.167649574609645E-4	B4GALT1, PTPRC, BCLAF1, HERPUD1, PIM1, PIM3, SAP30BP, SIRT1, NLRP1, NFKBIL1, CITED2, HIPK1, CD44, BCL11B, BAG3, MTCH1, DAD1, SEMA4D, INPP5D, CLN8, FGD3, HSPA9	143	815	13528	2.553657385559226	0.15910570295213144	0.056126479854196165	0.19358126618690408
RNAP II total no Ser5P	cell death	20	0.9779951100244498	1.842867213895132E-4	LITAF, SAP30BP, SIRT1, DIDO1, NLRP1, NFKBIL1, SETX, CLPTM1L, TNFRSF1B, TMEM173, JMJD6, BAG3, TMEM123, MTCH1, DAD1, INPP5D, AXIN2, PPP1R15A, CLN8, FGD3	143	719	13528	2.631471449273953	0.23929275822589524	0.06609137204946824	0.3053629003426206
RNAP II total no Ser5P	RNA processing	17	0.8312958435207823	1.9959208127115092E-4	RNMT, CRNKL1, SARS, HNRNPA1, SETX, HNRNPA3, DDX17, DDX56, WDR36, RPS19, JMJD6, U2AF1, CPSF6, SFRS2IP, PRPF38B, CPSF1, DUS2L	143	547	13528	2.9400800296595544	0.25637931905018174	0.05752401709981836	0.33068441555210715
RNAP II total no Ser5P	death	20	0.9779951100244498	2.0137698304518173E-4	LITAF, SAP30BP, SIRT1, DIDO1, NLRP1, NFKBIL1, SETX, CLPTM1L, TNFRSF1B, TMEM173, JMJD6, BAG3, TMEM123, MTCH1, DAD1, INPP5D, AXIN2, PPP1R15A, CLN8, FGD3	143	724	13528	2.613298303906039	0.2583468047886376	0.04859197127136339	0.33363700173197897
RNAP II total no Ser5P	positive regulation of lymphocyte differentiation	5	0.24449877750611246	4.7318749122584713E-4	PTPRC, TGFBR2, ZAP70, RARA, INPP5D	143	35	13528	13.514485514485516	0.504593394307626	0.09546971281826389	0.7823081294429324
RNAP II total no Ser5P	immune system development	11	0.5378973105134475	6.626367275391969E-4	PTPRC, RPS19, JMJD6, BCL11B, XRCC6, TGFBR2, ZAP70, MYH9, TACC3, PIK3R1, MYST3	143	276	13528	3.770345596432553	0.6260670779799192	0.11570083912703333	1.093904205463525
RNAP II total no Ser5P	hemopoiesis	10	0.4889975550122249	8.597685200463199E-4	PTPRC, RPS19, JMJD6, BCL11B, TGFBR2, ZAP70, MYH9, TACC3, PIK3R1, MYST3	143	236	13528	4.008533839042315	0.7209725977821635	0.13222885248072158	1.4171596967546218
RNAP II total no Ser5P	apoptosis	16	0.7823960880195598	0.0016392415015271972	LITAF, SAP30BP, SIRT1, DIDO1, NLRP1, NFKBIL1, CLPTM1L, TMEM173, TNFRSF1B, JMJD6, BAG3, MTCH1, DAD1, INPP5D, PPP1R15A, FGD3	143	602	13528	2.5143228864159095	0.9123698714974207	0.21609155183428097	2.6856361009700236
RNAP II total no Ser5P	hemopoietic or lymphoid organ development	10	0.4889975550122249	0.0016882962027272854	PTPRC, RPS19, JMJD6, BCL11B, TGFBR2, ZAP70, MYH9, TACC3, PIK3R1, MYST3	143	260	13528	3.6385153308230236	0.9185323201471662	0.20384309142433676	2.764950100275776
RNAP II total no Ser5P	programmed cell death	16	0.7823960880195598	0.001894371341697111	LITAF, SAP30BP, SIRT1, DIDO1, NLRP1, NFKBIL1, CLPTM1L, TMEM173, TNFRSF1B, JMJD6, BAG3, MTCH1, DAD1, INPP5D, PPP1R15A, FGD3	143	611	13528	2.477287033751846	0.9400301421202583	0.20902804553409338	3.097479139634818
RNAP II total no Ser5P	positive regulation of alpha-beta T cell activation	4	0.19559902200488996	0.0024666696723311577	PTPRC, TGFBR2, ZAP70, RARA	143	26	13528	14.554061323292093	0.9743973623707713	0.24567176792694512	4.015360811780122
RNAP II total no Ser5P	leukocyte differentiation	7	0.3422982885085574	0.002570440244202312	PTPRC, JMJD6, BCL11B, TGFBR2, ZAP70, MYH9, PIK3R1	143	131	13528	5.055036566486947	0.9780600094463513	0.23876825973666582	4.180915870198754
RNAP II total no Ser5P	regulation of lymphocyte differentiation	5	0.24449877750611246	0.004292263628547054	PTPRC, TGFBR2, ZAP70, RARA, INPP5D	143	63	13528	7.508047508047508	0.9983106792024443	0.34659747475825986	6.88904213102155
RNAP II total no Ser5P	positive regulation of T cell differentiation	4	0.19559902200488996	0.004494690941239764	PTPRC, TGFBR2, ZAP70, RARA	143	32	13528	11.825174825174825	0.9987506807711283	0.3415207575743917	7.202656457166434
RNAP II total no Ser5P	mRNA metabolic process	11	0.5378973105134475	0.005646644321112681	HNRNPA3, RNMT, CRNKL1, JMJD6, U2AF1, CPSF6, SFRS2IP, MAPKAPK2, HNRNPA1, PRPF38B, CPSF1	143	370	13528	2.8124740124740124	0.9997758887503103	0.3900118592947246	8.96852793378593
RNAP II total no Ser5P	regulation of alpha-beta T cell activation	4	0.19559902200488996	0.006275807164816788	PTPRC, TGFBR2, ZAP70, RARA	143	36	13528	10.511266511266511	0.9999123925845246	0.40490595580025657	9.919611767704318
RNAP II total no Ser5P	mRNA processing	10	0.4889975550122249	0.006767539907663347	HNRNPA3, RNMT, CRNKL1, JMJD6, U2AF1, CPSF6, SFRS2IP, HNRNPA1, PRPF38B, CPSF1	143	321	13528	2.9470840685793958	0.9999579716693662	0.4116170049272825	10.656437623617709
RNAP II total no Ser5P	positive regulation of developmental process	9	0.4400977995110024	0.009039881331186708	B4GALT1, PTPRC, XRCC6, TGFBR2, ZAP70, TGIF1, RARA, SEMA4D, INPP5D	143	278	13528	3.062635206520099	0.9999985960033712	0.4902370079111805	13.988417211550729
RNAP II total and Ser5P	negative regulation of signal transduction	9	0.9493671	2.944060e-05	STMN3, CD3E, SOCS3, SMAD7, NFKBIA, SKI, TNFAIP3, DDIT4, RHOH	76	221	13528	7.248869	0.02537454	0.02537454	0.04569996
RNAP II total and Ser5P	negative regulation of cell communication	9	0.9493671	6.663737e-05	STMN3, CD3E, SOCS3, SMAD7, NFKBIA, SKI, TNFAIP3, DDIT4, RHOH	76	248	13528	6.459677	0.05651647	0.02866919	0.10341170
RNAP II total and Ser5P	maintenance of protein location	5	0.5274262	1.409556e-04	NFKBIA, TMSB4X, TMSB10, FLNA, SRGN	76	48	13528	18.541667	0.11579193	0.04019099	0.21862491
RNAP II total and Ser5P	cell death	14	1.4767932	1.444552e-04	VAV3, FOSL2, MCL1, STK17B, NFKBIA, BIRC3, DDIT4, EIF4G2, GSPT1, AEN, ZC3H12A, HSPE1, TNFAIP3, SRGN	76	719	13528	3.465925	0.11848961	0.03103775	0.22404721
RNAP II total and Ser5P	death	14	1.4767932	1.547541e-04	VAV3, FOSL2, MCL1, STK17B, NFKBIA, BIRC3, DDIT4, EIF4G2, GSPT1, AEN, ZC3H12A, HSPE1, TNFAIP3, SRGN	76	724	13528	3.441989	0.12638085	0.02666032	0.24000261
RNAP II total and Ser5P	maintenance of location	5	0.5274262	4.304766e-04	NFKBIA, TMSB4X, TMSB10, FLNA, SRGN	76	64	13528	13.906250	0.31332007	0.06072580	0.66627607
RNAP II total and Ser5P	apoptosis	12	1.2658228	4.534739e-04	VAV3, MCL1, GSPT1, AEN, STK17B, NFKBIA, ZC3H12A, HSPE1, TNFAIP3, BIRC3, SRGN, DDIT4	76	602	13528	3.548173	0.32697481	0.05499731	0.70175333
RNAP II total and Ser5P	programmed cell death	12	1.2658228	5.137227e-04	VAV3, MCL1, GSPT1, AEN, STK17B, NFKBIA, ZC3H12A, HSPE1, TNFAIP3, BIRC3, SRGN, DDIT4	76	611	13528	3.495908	0.36147547	0.05453121	0.79464121
RNAP II total and Ser5P	regulation of apoptosis	13	1.3713080	1.466092e-03	YWHAZ, VAV3, MAEA, MCL1, SOCS3, CD3E, STK17B, NFKBIA, BIRC3, GSPT1, AEN, HSPE1, TNFAIP3	76	804	13528	2.878109	0.72219538	0.13265222	2.25218784
RNAP II total and Ser5P	regulation of programmed cell death	13	1.3713080	1.594853e-03	YWHAZ, VAV3, MAEA, MCL1, SOCS3, CD3E, STK17B, NFKBIA, BIRC3, GSPT1, AEN, HSPE1, TNFAIP3	76	812	13528	2.849754	0.75177464	0.13006939	2.44770515
RNAP II total and Ser5P	regulation of cell death	13	1.3713080	1.645497e-03	YWHAZ, VAV3, MAEA, MCL1, SOCS3, CD3E, STK17B, NFKBIA, BIRC3, GSPT1, AEN, HSPE1, TNFAIP3	76	815	13528	2.839264	0.76252715	0.12251918	2.52450465
RNAP II total and Ser5P	thymic T cell selection	3	0.3164557	2.273878e-03	CD3D, CD3E, ITPKB	76	13	13528	41.076923	0.86294270	0.15262591	3.47273045
RNAP II total and Ser5P	intracellular signaling cascade	16	1.6877637	3.336217e-03	VAV3, PTGER4, STMN3, SOCS3, SMAD7, PIK3CD, STK17B, NFKBIA, ITPKB, FLNA, IFNAR1, S1PR1, RNF4, AEN, S1PR4, RHOH	76	1256	13528	2.267516	0.94592519	0.20101601	5.05619490
RNAP II total and Ser5P	regulation of DNA binding	5	0.5274262	4.539964e-03	SMAD7, NFKBIA, SKI, FLNA, CALM1	76	121	13528	7.355372	0.98117204	0.24704043	6.82105124
RNAP II total and Ser5P	T cell selection	3	0.3164557	4.878956e-03	CD3D, CD3E, ITPKB	76	19	13528	28.105263	0.98601477	0.24772265	7.31249301
RNAP II total and Ser5P	T cell activation	5	0.5274262	5.239177e-03	CD3D, CD3E, ITPKB, IFNAR1, RHOH	76	126	13528	7.063492	0.98980467	0.24919857	7.83205196
RNAP II total and Ser5P	T cell differentiation	4	0.4219409	5.588287e-03	CD3D, CD3E, ITPKB, RHOH	76	65	13528	10.953846	0.99249553	0.25007329	8.33298336
RNAP II total and Ser5P	anti-apoptosis	6	0.6329114	5.682878e-03	YWHAZ, MCL1, SOCS3, NFKBIA, TNFAIP3, BIRC3	76	206	13528	5.184466	0.99309358	0.24149488	8.46827212
RNAP II total and Ser5P	regulation of Ras protein signal transduction	6	0.6329114	6.156610e-03	SMAP2, VAV3, S1PR1, STMN3, CYTH1, ITPKB	76	210	13528	5.085714	0.99544411	0.24704846	9.14301627
RNAP II total and Ser5P	regulation of cell adhesion	5	0.5274262	7.023832e-03	VAV3, CYTIP, S1PR1, CYTH1, SMAD7	76	137	13528	6.496350	0.99787385	0.26484363	10.36617356
RNAP II total and Ser5P	positive regulation of alpha-beta T cell activation	3	0.3164557	9.043658e-03	CD3E, IL4R, ITPKB	76	26	13528	20.538462	0.99964058	0.31454205	13.15553218
RNAP II total and Ser5P	regulation of ossification	4	0.4219409	9.246844e-03	PTGER4, JUND, SKI, SRGN	76	78	13528	9.128205	0.99969950	0.30832466	13.43158793
RNAP II total and Ser5P	T cell differentiation in the thymus	3	0.3164557	9.732347e-03	CD3D, CD3E, ITPKB	76	27	13528	19.777778	0.99980411	0.31010466	14.08788805
RNAP II total and Ser5P	regulation of binding	5	0.5274262	1.027462e-02	SMAD7, NFKBIA, SKI, FLNA, CALM1	76	153	13528	5.816993	0.99987857	0.31317274	14.81542190
RNAP II total and Ser5P	regulation of hydrolase activity	7	0.7383966	1.089675e-02	SMAP2, VAV3, S1PR1, STMN3, GSPT1, S1PR4, HSPE1	76	337	13528	3.697329	0.99992986	0.31791635	15.64300522
RNAP II total and Ser5P	leukocyte activation	6	0.6329114	1.099105e-02	YWHAZ, CD3D, CD3E, ITPKB, IFNAR1, RHOH	76	242	13528	4.413223	0.99993547	0.31001729	15.76778439
RNAP II total and Ser5P	G-protein signaling, coupled to cAMP nucleotide second messenger	4	0.4219409	1.167934e-02	S1PR1, PTGER4, S1PR4, FLNA	76	85	13528	8.376471	0.99996486	0.31603905	16.67334026
RNAP II total and Ser5P	regulation of small GTPase mediated signal transduction	6	0.6329114	1.292021e-02	SMAP2, VAV3, S1PR1, STMN3, CYTH1, ITPKB	76	252	13528	4.238095	0.99998826	0.33332907	18.28294794
RNAP II total and Ser5P	negative regulation of apoptosis	7	0.7383966	1.363372e-02	YWHAZ, MAEA, MCL1, SOCS3, NFKBIA, TNFAIP3, BIRC3	76	354	13528	3.519774	0.99999376	0.33850021	19.19526512
RNAP II total and Ser5P	negative regulation of programmed cell death	7	0.7383966	1.452302e-02	YWHAZ, MAEA, MCL1, SOCS3, NFKBIA, TNFAIP3, BIRC3	76	359	13528	3.470752	0.99999716	0.34669988	20.31899713
RNAP II total and Ser5P	negative regulation of cell death	7	0.7383966	1.470563e-02	YWHAZ, MAEA, MCL1, SOCS3, NFKBIA, TNFAIP3, BIRC3	76	360	13528	3.461111	0.99999758	0.34111400	20.54793838
RNAP II total and Ser5P	cAMP-mediated signaling	4	0.4219409	1.573749e-02	S1PR1, PTGER4, S1PR4, FLNA	76	95	13528	7.494737	0.99999903	0.35127911	21.83004050
RNAP II total and Ser5P	regulation of alpha-beta T cell activation	3	0.3164557	1.691714e-02	CD3E, IL4R, ITPKB	76	36	13528	14.833333	0.99999966	0.36324095	23.27204163
RNAP II total and Ser5P	lymphocyte differentiation	4	0.4219409	1.948754e-02	CD3D, CD3E, ITPKB, RHOH	76	103	13528	6.912621	0.99999997	0.39668210	26.32835697
RNAP II total and Ser5P	negative regulation of protein transport	3	0.3164557	2.064948e-02	NFKBIA, FLNA, SRGN	76	40	13528	13.350000	0.99999999	0.40574649	27.67223401
RNAP II total and Ser5P	cell activation	6	0.6329114	2.145331e-02	YWHAZ, CD3D, CD3E, ITPKB, IFNAR1, RHOH	76	287	13528	3.721254	0.99999999	0.40897943	28.58846977
RNAP II total and Ser5P	lymphocyte activation	5	0.5274262	2.456069e-02	CD3D, CD3E, ITPKB, IFNAR1, RHOH	76	199	13528	4.472362	1.00000000	0.44385972	32.02922892
RNAP II total and Ser5P	negative regulation of transcription factor activity	3	0.3164557	2.574836e-02	SMAD7, NFKBIA, FLNA	76	45	13528	11.866667	1.00000000	0.45079499	33.30285594
RNAP II total and Ser5P	G-protein signaling, coupled to cyclic nucleotide second messenger	4	0.4219409	2.596122e-02	S1PR1, PTGER4, S1PR4, FLNA	76	115	13528	6.191304	1.00000000	0.44501187	33.52875182
RNAP II total and Ser5P	regulation of GTPase activity	4	0.4219409	3.084314e-02	SMAP2, VAV3, S1PR1, STMN3	76	123	13528	5.788618	1.00000000	0.49527983	38.51725993
no Peak	transcription	333	1.70988447	6.203663e-16	ZNF57, STAT5B, MED25, ZNF639, ASCC1, REST, ZNF253, MED21, ZNF254, EPC2, TAF5L, FLI1, SFRS8, PRIM2, PHTF2, MED27, CREB3L2, ZNF107, ZNF394, ZNF43, ZNF644, ZNF507, RCOR1, ZHX2, MTPAP, HMG20A, MED13, PRDM8, ZNF787, C1ORF83, BAZ1A, MTF1, ASCC3, MED17, ZNF384, ZZZ3, ZNF383, PIAS2, ZNF41, TRAPPC2, SUV420H1, ZNF516, TADA3, GPBP1L1, TADA1, MYBL1, ZNF615, TCF20, DRAP1, LEO1, ZNF71, ASXL2, AEBP2, ZNF529, KL…	1435	2101	13528	1.494170	2.338796e-12	2.338796e-12	1.221245e-12
no Peak	cellular macromolecule catabolic process	144	0.73940950	5.089461e-14	RNASEN, PPP2R5C, CDC16, CD2AP, CNOT4, CUL5, WWP2, WIBG, RNF149, ANAPC1, ANAPC2, PAN3, DTL, ZHX2, SOCS6, UBR1, SOCS5, UBE2J2, BRAP, MIB1, TRIM33, FBXO18, FBXL5, PIAS2, ANAPC7, RNF20, ASB7, EIF2C3, RAD23B, DERL2, ANAPC10, UBE2V2, NEDD8, OAS2, FBXW7, UBE2D2, PSMB1, PSMB2, HNRNPD, FBXO5, FBXW2, FBXO4, FBXO3, FBXO42, UBE2D1, FBXO45, FBXO8, FBXO46, HECTD1, SPOP, SMG6, CDC23, CASC3, SUGT1, CDC27, PSMB9,…	1435	725	13528	1.872433	1.785281e-10	8.926404e-11	9.316992e-11
no Peak	proteolysis involved in cellular protein catabolic process	121	0.62130937	2.449049e-12	PPP2R5C, CDC16, CD2AP, CNOT4, CUL5, WWP2, RNF149, ANAPC1, ANAPC2, DTL, SOCS6, UBR1, SOCS5, UBE2J2, BRAP, MIB1, TRIM33, FBXO18, FBXL5, PIAS2, ANAPC7, RNF20, ASB7, RAD23B, DERL2, ANAPC10, UBE2V2, NEDD8, FBXW7, UBE2D2, PSMB1, PSMB2, FBXO5, FBXW2, FBXO4, FBXO42, FBXO3, UBE2D1, FBXO45, FBXO8, SPOP, HECTD1, FBXO46, CDC23, SUGT1, CDC27, PSMB9, FBXO38, UBA2, USPL1, HECW2, KIAA0368, UBE2G2, RLIM, ZYG11B, …	1435	600	13528	1.901148	8.598583e-09	2.866194e-09	4.487155e-09
no Peak	cellular protein catabolic process	121	0.62130937	3.473834e-12	PPP2R5C, CDC16, CD2AP, CNOT4, CUL5, WWP2, RNF149, ANAPC1, ANAPC2, DTL, SOCS6, UBR1, SOCS5, UBE2J2, BRAP, MIB1, TRIM33, FBXO18, FBXL5, PIAS2, ANAPC7, RNF20, ASB7, RAD23B, DERL2, ANAPC10, UBE2V2, NEDD8, FBXW7, UBE2D2, PSMB1, PSMB2, FBXO5, FBXW2, FBXO4, FBXO42, FBXO3, UBE2D1, FBXO45, FBXO8, SPOP, HECTD1, FBXO46, CDC23, SUGT1, CDC27, PSMB9, FBXO38, UBA2, USPL1, HECW2, KIAA0368, UBE2G2, RLIM, ZYG11B, …	1435	603	13528	1.891689	1.219682e-08	3.049205e-09	6.364886e-09
no Peak	regulation of transcription	377	1.93581515	4.083403e-12	STAT5B, SNIP1, ZNF57, MED25, ZNF639, ASCC1, REST, ZNF253, MED21, ZNF254, MAGED1, EPC2, APP, TAF5L, FLI1, SFRS8, PHTF2, MED27, CREB3L2, ZNF107, ZNF394, ZNF43, ZNF644, ZNF507, RCOR1, ZHX2, HMG20A, MED13, PRDM8, ZNF787, BAZ1A, MTF1, ASCC3, MED17, ZNF384, ZZZ3, ZNF383, PIAS2, ZNF41, TRAPPC2, SUV420H1, ZNF516, TADA3, GPBP1L1, TADA1, MYBL1, ZNF615, JRK, TCF20, DRAP1, LEO1, ZNF71, ASXL2, DNMT3A, AEBP2, …	1435	2601	13528	1.366415	1.433682e-08	2.867364e-09	7.481649e-09
no Peak	macromolecule catabolic process	145	0.74454429	9.173753e-12	RNASEN, PPP2R5C, CDC16, CD2AP, CNOT4, CUL5, WWP2, WIBG, RNF149, ANAPC1, ANAPC2, PAN3, DTL, ZHX2, SOCS6, UBR1, SOCS5, UBE2J2, BRAP, MIB1, TRIM33, FBXO18, FBXL5, PIAS2, ANAPC7, RNF20, ASB7, EIF2C3, RAD23B, DERL2, ANAPC10, UBE2V2, NEDD8, OAS2, FBXW7, UBE2D2, PSMB1, PSMB2, HNRNPD, FBXO5, FBXW2, FBXO4, FBXO3, FBXO42, UBE2D1, FBXO45, FBXO8, FBXO46, HECTD1, SPOP, SMG6, CDC23, CHI3L2, CASC3, SUGT1, CDC27…	1435	781	13528	1.750244	3.220912e-08	5.368186e-09	1.680828e-08
no Peak	modification-dependent macromolecule catabolic process	115	0.59050064	1.420714e-11	PPP2R5C, CDC16, CD2AP, CNOT4, CUL5, WWP2, RNF149, ANAPC1, ANAPC2, DTL, SOCS6, UBR1, SOCS5, UBE2J2, BRAP, MIB1, TRIM33, FBXO18, FBXL5, PIAS2, ANAPC7, RNF20, ASB7, RAD23B, DERL2, ANAPC10, UBE2V2, NEDD8, FBXW7, UBE2D2, PSMB1, PSMB2, FBXO5, FBXW2, FBXO4, FBXO42, FBXO3, UBE2D1, FBXO8, FBXO45, SPOP, HECTD1, FBXO46, CDC23, SUGT1, CDC27, PSMB9, FBXO38, UBA2, USPL1, HECW2, KIAA0368, UBE2G2, RLIM, ZYG11B, …	1435	574	13528	1.888720	4.988145e-08	7.125921e-09	2.603054e-08
no Peak	modification-dependent protein catabolic process	115	0.59050064	1.420714e-11	PPP2R5C, CDC16, CD2AP, CNOT4, CUL5, WWP2, RNF149, ANAPC1, ANAPC2, DTL, SOCS6, UBR1, SOCS5, UBE2J2, BRAP, MIB1, TRIM33, FBXO18, FBXL5, PIAS2, ANAPC7, RNF20, ASB7, RAD23B, DERL2, ANAPC10, UBE2V2, NEDD8, FBXW7, UBE2D2, PSMB1, PSMB2, FBXO5, FBXW2, FBXO4, FBXO42, FBXO3, UBE2D1, FBXO8, FBXO45, SPOP, HECTD1, FBXO46, CDC23, SUGT1, CDC27, PSMB9, FBXO38, UBA2, USPL1, HECW2, KIAA0368, UBE2G2, RLIM, ZYG11B, …	1435	574	13528	1.888720	4.988145e-08	7.125921e-09	2.603054e-08
no Peak	protein catabolic process	121	0.62130937	2.920498e-11	PPP2R5C, CDC16, CD2AP, CNOT4, CUL5, WWP2, RNF149, ANAPC1, ANAPC2, DTL, SOCS6, UBR1, SOCS5, UBE2J2, BRAP, MIB1, TRIM33, FBXO18, FBXL5, PIAS2, ANAPC7, RNF20, ASB7, RAD23B, DERL2, ANAPC10, UBE2V2, NEDD8, FBXW7, UBE2D2, PSMB1, PSMB2, FBXO5, FBXW2, FBXO4, FBXO42, FBXO3, UBE2D1, FBXO45, FBXO8, SPOP, HECTD1, FBXO46, CDC23, SUGT1, CDC27, PSMB9, FBXO38, UBA2, USPL1, HECW2, KIAA0368, UBE2G2, RLIM, ZYG11B, …	1435	622	13528	1.833904	1.025387e-07	1.281733e-08	5.350962e-08
no Peak	cell cycle	142	0.72913992	4.605770e-11	RAD51C, PRC1, OSGIN2, CDC16, CD2AP, SART1, CUL5, APP, CASP8AP2, VPS4B, DNAJC2, MAP2K6, ANAPC1, ANAPC2, LIG1, RBL1, LIG3, MND1, LIG4, FOXN3, NCAPD2, WBP2NL, C14ORF106, CLIP1, PDCD6IP, ANAPC7, SEPT9, PPP5C, BLM, ITGAE, NEDD9, ANAPC10, ANLN, SESN1, PIN1, SPC24, PSMB1, RAD51L1, NCAPG2, KATNA1, PSMB2, CDC123, SKA3, FBXO5, TNKS, UBE2D1, TFDP1, CREBL2, TAF2, CKAP2, CCPG1, MKI67, CKAP5, PCNT, CDC23, NDC8…	1435	776	13528	1.725076	1.617086e-07	1.796763e-08	8.438737e-08
no Peak	establishment of protein localization	136	0.69833119	1.339770e-09	XPO1, SEC31A, AP4E1, AP1G1, CHMP4B, VPS53, SSR1, HOOK3, ANK3, VPS4B, VPS13A, STAM, GLE1, NUP35, SCAMP4, RAB27A, NUP133, ACTN4, OPTN, NUPL1, VTI1A, BCAP31, LYST, USO1, RAB12, PDCD6IP, RAB10, VPS26A, DERL2, AFTPH, ARFGAP3, SDAD1, SNX6, NAPG, SNX5, STAM2, MTX2, COPZ1, SNX1, CCDC91, SNX4, TOMM7, STX12, CSE1L, STX16, TNKS, STX11, FAM160A2, SRP54, HTT, C18ORF55, RAB33A, RAB33B, EPS15, TOMM70A, TRPS1, S…	1435	769	13528	1.667225	4.703921e-06	4.703931e-07	2.454739e-06
no Peak	protein transport	134	0.68806162	2.651156e-09	XPO1, SEC31A, AP4E1, AP1G1, CHMP4B, VPS53, SSR1, HOOK3, VPS4B, VPS13A, STAM, GLE1, NUP35, SCAMP4, RAB27A, NUP133, ACTN4, OPTN, NUPL1, VTI1A, BCAP31, LYST, USO1, RAB12, PDCD6IP, RAB10, VPS26A, DERL2, AFTPH, ARFGAP3, SDAD1, SNX6, NAPG, SNX5, STAM2, MTX2, COPZ1, SNX1, CCDC91, SNX4, TOMM7, STX12, CSE1L, STX16, TNKS, STX11, FAM160A2, SRP54, HTT, C18ORF55, RAB33A, RAB33B, EPS15, TOMM70A, TRPS1, SPTBN1,…	1435	762	13528	1.657798	9.308164e-06	8.462003e-07	4.857472e-06
no Peak	mitotic cell cycle	78	0.40051348	3.842599e-09	PRC1, E2F6, CDC16, LATS1, CD2AP, FAM83D, ACVR1B, APP, CUL5, CEP250, PSMD1, PSMD2, DNAJC2, VCPIP1, ANAPC1, CDC7, KHDRBS1, ANAPC2, ARHGEF2, KIF11, TPX2, NUSAP1, FOXN3, NCAPD2, PPM1D, C14ORF106, CLIP1, ADAM17, MDM2, HAUS8, ANAPC7, PPP5C, ACVR1, BLM, CAMK2G, POLA1, NEDD9, ANLN, ANAPC10, SPC24, PSMF1, PSMB1, CENPA, NCAPG2, KATNA1, PSMB2, CDC123, NPAT, BUB1, HINFP, CAMK2D, PPP3CB, FBXO5, SKA3, TNKS, GF…	1435	370	13528	1.987351	1.349127e-05	1.124280e-06	7.040446e-06
no Peak	intracellular transport	119	0.61103979	4.050130e-09	XPO1, SEC31A, AP4E1, AP1G1, SSR1, HOOK3, SLC25A20, APP, GBF1, VPS4B, VPS13A, STAM, GLE1, RAB27A, NUP133, OPA1, OPTN, VTI1A, BCAP31, NPC1, CAMK4, ATP2C1, LYST, ZNF384, USO1, VPS26A, LRPPRC, TRAPPC3, TRAPPC2, ZC3H3, DERL2, ARFGAP3, STX8, SNX6, NAPG, STAM2, MTX2, COPZ1, SNX1, BCL2L1, TOMM7, STX12, CSE1L, KIAA1012, STX16, STX11, FAM160A2, KIF3B, SRP54, SMG6, HTT, NXF1, KIAA1279, TOMM70A, TRPS1, RHOT1…	1435	657	13528	1.707510	1.421990e-05	1.093846e-06	7.420685e-06
no Peak	cell cycle process	106	0.54428755	4.647955e-09	RAD51C, PRC1, OSGIN2, CDC16, CD2AP, SART1, APP, CUL5, DNAJC2, MAP2K6, ANAPC1, ANAPC2, LIG3, MND1, FOXN3, NCAPD2, WBP2NL, C14ORF106, CLIP1, ANAPC7, PPP5C, BLM, NEDD9, ANLN, ANAPC10, SESN1, SPC24, PSMB1, RAD51L1, NCAPG2, KATNA1, CDC123, PSMB2, FBXO5, SKA3, TNKS, UBE2D1, TAF2, MKI67, CKAP5, PCNT, CDC23, NDC80, SUGT1, CDC27, PSMB9, NOTCH2, HDAC3, NEDD1, NOLC1, SMC1A, E2F6, LATS1, FAM83D, ACVR1B, SBDS…	1435	565	13528	1.768639	1.631884e-05	1.165640e-06	8.516026e-06
no Peak	protein localization	149	0.76508344	4.974468e-09	XPO1, SEC31A, AP4E1, AP1G1, CHMP4B, VPS53, HOOK3, SSR1, VPS13C, ANK3, VPS4B, VPS13A, STAM, GLE1, NUP35, SCAMP4, RAB27A, NUP133, ACTN4, OPTN, NUPL1, VTI1A, BCAP31, LYST, USO1, AKAP7, RAB12, PDCD6IP, RAB10, VPS26A, DERL2, AFTPH, ARFGAP3, SDAD1, SNX6, NAPG, SNX5, STAM2, MTX2, COPZ1, SNX1, CCDC91, AKAP10, NEDD8, SNX4, TOMM7, STX12, CSE1L, KATNA1, STX16, TNKS, STX11, FAM160A2, SRP54, TAF3, HTT, NDC80,…	1435	882	13528	1.592573	1.746520e-05	1.164356e-06	9.114266e-06
no Peak	chromosome organization	93	0.47753530	1.564228e-08	XRCC5, RAD51C, RSF1, ARID4A, HP1BP3, UTY, ARID4B, CBX3, CTCF, CBX1, LATS1, CBX5, EPC2, TAF5L, HIST1H2BK, MYST2, KDM5B, KDM5C, MYST4, TBL1XR1, AIFM1, RCOR1, RBL1, HMG20A, NUSAP1, BANP, LIG4, ARID1B, HLTF, NCAPD2, EYA3, TAF12, SMARCE1, BPTF, ASH1L, JMJD1C, RNF20, SUV420H1, SMARCA4, SMARCAD1, SUPT3H, ING4, BLM, TADA3, HAT1, PRKDC, TADA1, CDC73, TRRAP, RPA1, CDYL, CDYL2, CENPA, NCAPG2, HJURP, SAFB, C…	1435	485	13528	1.807686	5.491855e-05	3.432498e-06	2.865994e-05
no Peak	response to DNA damage stimulus	75	0.38510911	6.353201e-08	XRCC5, RAD51C, MICA, ZMAT3, UVRAG, RPS27L, FOXO3, XRCC1, PMS2L3, IGHMBP2, EPC2, CASP3, FANCF, POLG2, MAP2K6, PMS1, SP100, AIFM1, DTL, DDB1, LIG1, LIG3, IFI16, LIG4, FOXN3, C9ORF80, GTF2H1, EYA3, DCLRE1B, PSEN1, FBXO18, HIPK2, NHEJ1, RAD23B, ING4, BLM, XIAP, WRNIP1, MGMT, POLA1, PML, PRKDC, UBE2V2, RRM2B, SESN1, RPA3, RPA1, PRPF19, SUMO1, RAD51L1, HINFP, POLN, AATF, DYRK2, APC, MSH2, SMC6, WRN, CE…	1435	373	13528	1.895545	2.230360e-04	1.312114e-05	1.164039e-04
no Peak	negative regulation of macromolecule metabolic process	124	0.63671374	1.183896e-07	RNASEN, ZNF639, CBX3, REST, CDC16, ZNF254, CBX5, IGHMBP2, FNTA, WWP2, CLP1, TIA1, EIF2B3, AKIRIN2, MYST4, ANAPC1, ANAPC2, GABPA, RBL1, ZHX2, PKIA, FOXN3, SMARCE1, TRIM33, ANAPC7, EIF2C3, SMARCA4, GCLC, SNX6, BLM, ANAPC10, BCL2L1, ZC3H8, NR2C1, PSMB1, DRAP1, PSMB2, FBXO5, TAF9, UBE2D1, RUNX2, PGGT1B, DNMT3A, EHMT1, KLF12, CDC23, SMAD2, CDC27, UIMC1, PSMB9, HDAC4, HDAC3, TRPS1, RFX3, RSF1, ARID4A, …	1435	734	13528	1.592602	4.155795e-04	2.309228e-05	2.169143e-04
no Peak	protein complex assembly	92	0.47240051	2.224371e-07	XPO1, E2F3, RSF1, COX10, CAPZA2, LNX2, CD2AP, IGHMBP2, TRIM4, GTF2E1, NOD2, GTF2E2, NOD1, NDUFS4, GSN, ZFYVE9, MED27, CASP8, NDUFS8, CAT, FAS, COX18, MYC, MDN1, BRF1, BRAF, PFKL, TMEM70, MED13, DECR1, IPO8, MBD2, GTF2H1, STOM, MED4, TAF12, GTF2I, TBCA, UQCRH, MED17, RRM2, NUP205, NCK1, RRM1, IPO5, MDM2, TUBA4B, MDM4, WASL, KPNA3, SPAST, SEPT9, PPP5C, SMARCAD1, POLR2G, TRAF2, NUP98, NAPG, BLM, GRB…	1435	505	13528	1.717426	7.806717e-04	4.110319e-05	4.075505e-04
no Peak	protein complex biogenesis	92	0.47240051	2.224371e-07	XPO1, E2F3, RSF1, COX10, CAPZA2, LNX2, CD2AP, IGHMBP2, TRIM4, GTF2E1, NOD2, GTF2E2, NOD1, NDUFS4, GSN, ZFYVE9, MED27, CASP8, NDUFS8, CAT, FAS, COX18, MYC, MDN1, BRF1, BRAF, PFKL, TMEM70, MED13, DECR1, IPO8, MBD2, GTF2H1, STOM, MED4, TAF12, GTF2I, TBCA, UQCRH, MED17, RRM2, NUP205, NCK1, RRM1, IPO5, MDM2, TUBA4B, MDM4, WASL, KPNA3, SPAST, SEPT9, PPP5C, SMARCAD1, POLR2G, TRAF2, NUP98, NAPG, BLM, GRB…	1435	505	13528	1.717426	7.806717e-04	4.110319e-05	4.075505e-04
no Peak	cell cycle phase	79	0.40564827	2.648520e-07	RAD51C, PRC1, E2F6, OSGIN2, CDC16, LATS1, CD2AP, FAM83D, ACVR1B, APP, CUL5, DNAJC2, VCPIP1, ANAPC1, CDC7, KHDRBS1, ANAPC2, ARHGEF2, KIF11, LIG3, TPX2, NUSAP1, MND1, FOXN3, NCAPD2, PPM1D, WBP2NL, C14ORF106, TOP3A, CLIP1, ADAM17, MDM2, HAUS8, ANAPC7, PPP5C, ACVR1, CEP120, BLM, CAMK2G, POLA1, NEDD9, ANLN, ANAPC10, RPA1, SPC24, RAD51L1, NCAPG2, KATNA1, CDC123, NPAT, BUB1, HINFP, CAMK2D, PPP3CB, FBXO5…	1435	414	13528	1.798906	9.294632e-04	4.649369e-05	4.852631e-04
no Peak	negative regulation of gene expression	90	0.46213094	7.525318e-07	RNASEN, RSF1, FOXK1, ARID4A, E2F6, ZNF639, ZNF675, CBX3, ZNF202, CTCF, ZEB1, REST, RLIM, ZNF254, CBX5, IGHMBP2, WWP2, CLP1, MYC, KCNQ1, KDM5B, AKIRIN2, MYST4, ATF7IP, KHDRBS1, TBL1XR1, SP100, ZCCHC11, ARID5B, GABPA, RBL1, ZHX2, MBD2, PKIA, FOXN3, MXD4, NCOA2, SMARCE1, BPTF, TRIM33, HIPK2, NAB1, MDM2, MDM4, COMMD7, EIF2C3, SMARCA4, C1D, ZMYND11, ING4, BTAF1, GCLC, SNX6, PML, HAT1, ERI1, BCL2L1, ZN…	1435	504	13528	1.683425	2.638653e-03	1.258083e-04	1.378787e-03
no Peak	chromatin modification	57	0.29268293	9.489200e-07	RSF1, UTY, CBX3, CTCF, EPC2, TAF5L, MYST2, KDM5B, MYST4, KDM5C, TBL1XR1, RCOR1, RBL1, HMG20A, BANP, ARID1B, HLTF, EYA3, TAF12, BPTF, SMARCE1, ASH1L, JMJD1C, RNF20, SMARCA4, SUV420H1, SMARCAD1, SUPT3H, ING4, TADA3, HAT1, TADA1, CDC73, TRRAP, HJURP, LEO1, TAF9, DNMT3A, AEBP2, CSRP2BP, EHMT1, SETDB2, KAT2B, CREBBP, UIMC1, RPS6KA5, MSL3, HDAC4, PHF17, HDAC3, SAP130, SMARCC1, WHSC1L1, PHF15, BRE, KDM4…	1435	274	13528	1.961128	3.326116e-03	1.514276e-04	1.738606e-03
no Peak	cellular response to stress	98	0.50320924	9.742671e-07	XRCC5, RAD51C, MICA, RPS27L, FOXO3, MBIP, XRCC1, IGHMBP2, MAP3K5, EPC2, INSIG2, MDFIC, COL4A3BP, EIF2B3, PMS1, MAP2K6, DTL, LIG1, LIG3, LIG4, FOXN3, MAP4K3, HIF1A, DCLRE1B, FBXO18, MAPK9, RAD23B, DERL2, BLM, ST8SIA1, UBE2V2, RRM2B, SESN1, SLC11A2, RAD51L1, POLN, DYRK2, MAP2K4, WRN, UIMC1, PTPN11, ATP7A, POLD3, SUPT16H, PARP4, PARP1, SMC1A, ZMAT3, UVRAG, PMS2L3, CASP3, XYLT1, FANCF, POLG2, CAT, FA…	1435	566	13528	1.632268	3.414810e-03	1.487130e-04	1.785046e-03
no Peak	ubiquitin-dependent protein catabolic process	52	0.26700899	1.112123e-06	USPL1, KIAA0368, UBE2G2, PPP2R5C, CDC16, CD2AP, CUL5, PSMD1, PSMD2, USP12, USP15, USP13, ANAPC1, ANAPC2, TBL1XR1, DDB1, UBR1, MDM2, UCHL3, SIAH1, ANAPC7, USP25, RNF20, RAD23B, DERL2, C10ORF46, NEDD8, ANAPC10, EDEM3, CYLD, PSMF1, UBE2D2, PSMB1, MAP3K1, PSMB2, PPP2CB, FBXO4, UBE2D1, FBXO8, BUB3, USP32, RNF144B, CDC23, CDC27, PSMB9, PSMD11, PSMD10, FAF1, TCEB1, CUL4B, USP48, TBL1X	1435	242	13528	2.025675	3.897052e-03	1.626811e-04	2.037622e-03
no Peak	chromatin organization	70	0.35943517	4.135320e-06	RSF1, ARID4A, HP1BP3, UTY, ARID4B, CBX3, CTCF, CBX1, CBX5, EPC2, TAF5L, HIST1H2BK, MYST2, KDM5B, KDM5C, MYST4, TBL1XR1, RCOR1, RBL1, HMG20A, BANP, ARID1B, HLTF, EYA3, TAF12, BPTF, SMARCE1, ASH1L, JMJD1C, RNF20, SUV420H1, SMARCA4, SMARCAD1, SUPT3H, ING4, TADA3, HAT1, TADA1, CDC73, TRRAP, CDYL, HJURP, CENPA, CDYL2, SAFB, CHD2, LEO1, TAF9, DNMT3A, AEBP2, CSRP2BP, KAT2B, SETDB2, EHMT1, CREBBP, UIMC1,…	1435	378	13528	1.745774	1.441424e-02	5.805969e-04	7.576501e-03
no Peak	proteasomal protein catabolic process	28	0.14377407	5.051634e-06	RAD23B, DERL2, KIAA0368, UBE2G2, PPP2R5C, ANAPC10, CDC16, EDEM3, CD2AP, PSMF1, PSMB1, PSMB2, PSMD1, PPP2CB, PSMD2, UBE2D1, BUB3, ANAPC1, ANAPC2, TBL1XR1, CDC23, CDC27, PSMB9, PSMD11, PSMD10, ANAPC7, FAF1, TBL1X	1435	102	13528	2.587853	1.757997e-02	6.819339e-04	9.255246e-03
no Peak	proteasomal ubiquitin-dependent protein catabolic process	28	0.14377407	5.051634e-06	RAD23B, DERL2, KIAA0368, UBE2G2, PPP2R5C, ANAPC10, CDC16, EDEM3, CD2AP, PSMF1, PSMB1, PSMB2, PSMD1, PPP2CB, PSMD2, UBE2D1, BUB3, ANAPC1, ANAPC2, TBL1XR1, CDC23, CDC27, PSMB9, PSMD11, PSMD10, ANAPC7, FAF1, TBL1X	1435	102	13528	2.587853	1.757997e-02	6.819339e-04	9.255246e-03
no Peak	interphase of mitotic cell cycle	28	0.14377407	6.164676e-06	BLM, E2F6, CAMK2G, POLA1, ANAPC10, LATS1, ACVR1B, APP, CUL5, KATNA1, CDC123, NPAT, HINFP, CAMK2D, PPP3CB, GFI1, DNAJC2, NFATC1, KHDRBS1, TAF2, CDC7, CDC23, CENPF, FOXN3, PPM1D, ADAM17, MDM2, ACVR1	1435	103	13528	2.562728	2.141169e-02	8.013174e-04	1.129437e-02
no Peak	cellular macromolecule localization	74	0.37997433	7.884336e-06	XPO1, CLTA, SEC24B, SEC24A, AP4E1, AP1G1, TIMM17A, HPS4, AP3S1, RAB3IP, SSR1, IMMP2L, CCHCR1, AP2B1, PEX1, ZFYVE9, STAM, COX18, RAB27A, AP3B1, ARHGEF2, STX2, OPTN, IPO8, VTI1A, BCAP31, MFN2, BBS2, ATG4C, NUP205, IPO5, USO1, TOMM20, SIL1, KPNA5, KPNA3, DERL2, NUP98, ARFGAP3, NAPG, SNX6, STAM2, MTX2, COPZ1, PML, SNX1, SEC62, STX12, TOMM7, CSE1L, STX16, PPP3CB, CHM, RAB11A, PEX14, TNKS, PEX13, APPBP…	1435	414	13528	1.685051	2.730238e-02	9.881548e-04	1.444477e-02
no Peak	negative regulation of transcription	80	0.41078306	8.512805e-06	RSF1, FOXK1, ARID4A, E2F6, ZNF639, ZNF675, CBX3, ZNF202, CTCF, ZEB1, REST, RLIM, ZNF254, CBX5, IGHMBP2, KDM5B, AKIRIN2, MYST4, ATF7IP, KHDRBS1, TBL1XR1, SP100, ARID5B, GABPA, RBL1, ZHX2, MBD2, PKIA, FOXN3, MXD4, NCOA2, SMARCE1, TRIM33, BPTF, HIPK2, NAB1, MDM2, MDM4, COMMD7, C1D, SMARCA4, ZMYND11, ING4, BTAF1, GCLC, SNX6, PML, HAT1, ZNF177, ZC3H8, NR2C1, ZNF174, SUMO1, ORC2L, DRAP1, POU2F1, HINFP,…	1435	459	13528	1.643081	2.944634e-02	1.030110e-03	1.559609e-02
no Peak	macromolecular complex subunit organization	113	0.58023107	8.565876e-06	XPO1, CAPZA2, LNX2, SNRPD1, CD2AP, IGHMBP2, GTF2E1, GTF2E2, HIST1H2BK, CLP1, SFRS8, MED27, FAS, TGS1, MYST4, CLNS1A, NUP133, BRAF, MED13, SMARCE1, MED17, TUBA4B, SEPT9, PPP5C, TRAF2, NAPG, BLM, GRB2, ANLN, PDSS2, CSE1L, FBXO5, TAF9, TAF2, TAF4, SRP54, CREBBP, EPRS, SMAD2, MTRF1L, GTF2F2, SUPT16H, XPO7, E2F3, RSF1, COX10, HP1BP3, CTCF, DSTN, TRIM4, NOD2, NOD1, NDUFS4, GSN, ZFYVE9, NDUFS8, CASP8, C…	1435	710	13528	1.500382	2.962717e-02	1.001995e-03	1.569331e-02
no Peak	phosphate metabolic process	146	0.74967908	9.626683e-06	PDP1, RNASEL, TBK1, STK35, PTPN22, CASK, PRKX, MAP3K7, TOP1, MAP3K5, APP, MDFIC, COL4A3BP, CLK4, PIK3C3, MLKL, FRS2, MAP2K6, PTPRJ, PAN3, ROCK1, BRAF, ROCK2, WNK1, MAP4K3, CAMK4, SCYL2, PDGFRA, ATP5C1, MAPK9, PPP5C, NEK7, STK10, MAPKAPK5, SSH2, MAPKAPK3, DUSP11, RIOK2, GPD1L, VRK1, SBK1, LMTK2, TNKS, DYRK2, GPD2, PTPN9, RYK, PTPN4, MAP2K4, MOBKL1A, DUSP22, SMAD2, OXSR1, PPA2, PTPN11, NDUFV3, EPHA…	1435	973	13528	1.414561	3.323463e-02	1.089711e-03	1.763663e-02
no Peak	phosphorus metabolic process	146	0.74967908	9.626683e-06	PDP1, RNASEL, TBK1, STK35, PTPN22, CASK, PRKX, MAP3K7, TOP1, MAP3K5, APP, MDFIC, COL4A3BP, CLK4, PIK3C3, MLKL, FRS2, MAP2K6, PTPRJ, PAN3, ROCK1, BRAF, ROCK2, WNK1, MAP4K3, CAMK4, SCYL2, PDGFRA, ATP5C1, MAPK9, PPP5C, NEK7, STK10, MAPKAPK5, SSH2, MAPKAPK3, DUSP11, RIOK2, GPD1L, VRK1, SBK1, LMTK2, TNKS, DYRK2, GPD2, PTPN9, RYK, PTPN4, MAP2K4, MOBKL1A, DUSP22, SMAD2, OXSR1, PPA2, PTPN11, NDUFV3, EPHA…	1435	973	13528	1.414561	3.323463e-02	1.089711e-03	1.763663e-02
no Peak	cell division	57	0.29268293	1.011352e-05	CCNT2, KIAA0174, PRC1, CDC14A, CDC16, CD2AP, LATS1, DSTN, FAM83D, TOP1, ATAD3B, VPS4B, ANAPC1, CDC7, ANAPC2, ARHGEF2, KIF11, STX2, ROCK1, ROCK2, CEP110, LIG1, LIG3, NUSAP1, LIG4, NCAPD2, ARL3, C14ORF106, HAUS8, ANAPC7, PDCD6IP, SPAST, SEPT9, NEDD9, ANLN, ANAPC10, SPC24, NCAPG2, KATNA1, CDC123, BUB1, SKA3, FBXO5, AATF, APC, PDS5A, CKAP5, CENPF, CDC23, NDC80, RACGAP1, CEP63, NEDD1, NOTCH1, KIF20B, …	1435	295	13528	1.821522	3.488571e-02	1.109033e-03	1.852847e-02
no Peak	intracellular protein transport	68	0.34916560	1.085080e-05	XPO1, CLTA, SEC24B, SEC24A, AP4E1, AP1G1, TIMM17A, HPS4, AP3S1, SSR1, IMMP2L, CCHCR1, AP2B1, PEX1, ZFYVE9, STAM, RAB27A, AP3B1, ARHGEF2, STX2, OPTN, IPO8, VTI1A, BCAP31, MFN2, ATG4C, NUP205, IPO5, USO1, TOMM20, SIL1, KPNA5, KPNA3, DERL2, NUP98, ARFGAP3, NAPG, SNX6, STAM2, MTX2, COPZ1, PML, SNX1, SEC62, STX12, TOMM7, CSE1L, STX16, PPP3CB, CHM, RAB11A, PEX14, PEX13, APPBP2, STX11, TNPO1, SRP54, HTT…	1435	374	13528	1.714032	3.738080e-02	1.153800e-03	1.987908e-02
no Peak	interphase	28	0.14377407	1.098114e-05	BLM, E2F6, CAMK2G, POLA1, ANAPC10, LATS1, ACVR1B, APP, CUL5, KATNA1, CDC123, NPAT, HINFP, CAMK2D, PPP3CB, GFI1, DNAJC2, NFATC1, KHDRBS1, TAF2, CDC7, CDC23, CENPF, FOXN3, PPM1D, ADAM17, MDM2, ACVR1	1435	106	13528	2.490198	3.782122e-02	1.133328e-03	2.011784e-02
no Peak	cellular protein localization	73	0.37483954	1.150895e-05	XPO1, CLTA, SEC24B, SEC24A, AP4E1, AP1G1, TIMM17A, HPS4, AP3S1, RAB3IP, SSR1, IMMP2L, CCHCR1, AP2B1, PEX1, ZFYVE9, STAM, COX18, RAB27A, AP3B1, ARHGEF2, STX2, OPTN, IPO8, VTI1A, BCAP31, MFN2, BBS2, ATG4C, NUP205, IPO5, USO1, TOMM20, SIL1, KPNA5, KPNA3, DERL2, NUP98, ARFGAP3, NAPG, SNX6, STAM2, MTX2, COPZ1, PML, SNX1, SEC62, STX12, TOMM7, CSE1L, STX16, PPP3CB, CHM, RAB11A, PEX14, TNKS, PEX13, APPBP…	1435	411	13528	1.674414	3.960264e-02	1.153853e-03	2.108471e-02
no Peak	DNA metabolic process	85	0.43645700	1.809049e-05	XRCC5, RAD51C, FHIT, UVRAG, CTCF, RPS27L, XRCC1, PMS2L3, IGHMBP2, TOP1, EPC2, CASP3, ORC4L, PRIM2, FANCF, POLG2, MYST2, MYC, DNAJC2, PMS1, HEMK1, ATF7IP, CDC7, AIFM1, DTL, LIG1, DDB1, LIG3, MND1, LIG4, MCM3, RMI1, C9ORF80, GTF2H1, EYA3, DCLRE1B, RRM2, FBXO18, RRM1, TOP3A, ORC5L, NHEJ1, MYO18A, RAD23B, ING4, NUP98, BLM, LIN9, WRNIP1, MGMT, POLA1, PML, PRKDC, UBE2V2, RRM2B, RPA3, RPA1, PRPF19, SUMO…	1435	506	13528	1.583617	6.154118e-02	1.762786e-03	3.314038e-02
no Peak	histone acetylation	17	0.08729140	1.944160e-05	SUPT3H, ING4, CSRP2BP, KAT2B, TADA3, CREBBP, HAT1, TADA1, TRRAP, PHF17, TAF5L, TAF12, SAP130, PHF15, TAF9, MYST2, MYST4	1435	48	13528	3.338792	6.598250e-02	1.843167e-03	3.561508e-02
no Peak	negative regulation of macromolecule biosynthetic process	90	0.46213094	2.266773e-05	RSF1, FOXK1, ARID4A, E2F6, ZNF639, ZNF675, CBX3, ZNF202, CTCF, ZEB1, REST, RLIM, ZNF254, CBX5, IGHMBP2, FNTA, TIA1, EIF2B3, KDM5B, AKIRIN2, MYST4, ATF7IP, PRKCA, KHDRBS1, TBL1XR1, SP100, ARID5B, GABPA, RBL1, ZHX2, IL6R, MBD2, PKIA, FOXN3, MXD4, NCOA2, SMARCE1, BPTF, TRIM33, HIPK2, NAB1, MDM2, MDM4, COMMD7, EIF2C3, SMARCA4, C1D, ZMYND11, ING4, BTAF1, GCLC, BLM, SNX6, PML, HAT1, ZNF177, ZC3H8, NR2C…	1435	547	13528	1.551090	7.650261e-02	2.092211e-03	4.152388e-02
no Peak	protein modification by small protein conjugation or removal	36	0.18485237	2.270909e-05	SUPT3H, COPS5, CDC73, NEDD8, UBE2V2, TRRAP, UBE3C, PRPF19, SUMO1, FBXW7, UBE2D2, WWP2, MAP3K1, USP12, LEO1, FBXO4, FBXO3, UBE2D1, FBXW11, TRIP12, VCPIP1, HECTD1, RNF144B, VHL, DDB1, RBBP6, UIMC1, MIB1, SENP1, TRIM33, FBXL5, MDM2, SIAH1, RNF20, BARD1, RNF41	1435	160	13528	2.121115	7.663672e-02	2.042336e-03	4.159963e-02
no Peak	macromolecular complex assembly	105	0.53915276	2.644950e-05	XPO1, CAPZA2, LNX2, SNRPD1, CD2AP, IGHMBP2, GTF2E1, GTF2E2, HIST1H2BK, CLP1, SFRS8, MED27, FAS, TGS1, MYST4, CLNS1A, BRAF, MED13, MED17, TUBA4B, SEPT9, PPP5C, TRAF2, NAPG, BLM, GRB2, ANLN, PDSS2, CSE1L, FBXO5, TAF9, TAF2, TAF4, SRP54, CREBBP, EPRS, SMAD2, GTF2F2, XPO7, E2F3, RSF1, COX10, HP1BP3, TRIM4, NOD2, NDUFS4, NOD1, GSN, ZFYVE9, NDUFS8, CASP8, CAT, COX18, MYC, MDN1, SRPK2, BRF1, PFKL, TMEM7…	1435	665	13528	1.488502	8.868388e-02	2.318943e-03	4.844993e-02
no Peak	histone H3 acetylation	12	0.06161746	3.118550e-05	SUPT3H, ING4, PHF17, TAF5L, TAF12, TADA3, SAP130, PHF15, TAF9, TADA1, MYST2, MYST4	1435	26	13528	4.351005	1.037125e-01	2.667022e-03	5.712293e-02
no Peak	regulation of transcription from RNA polymerase II promoter	112	0.57509628	4.072787e-05	STAT5B, CASK, FOXO3, MED21, ZNF254, IGHMBP2, MAGED1, GABPB1, APP, MED27, AKIRIN2, GABPA, RBL1, ZHX2, MED13, PKIA, HIF1A, SMARCE1, MTF1, TIAL1, MED17, SMARCA4, TFAP4, TADA3, SOX7, NEDD8, NR2C1, DRAP1, TAF9, RUNX1, RUNX2, TFDP1, TAF2, DNMT3A, TAF4, EHMT1, KLF9, KLF12, MAML2, CREBBP, SMAD2, TFCP2, MED13L, ATF5, HDAC4, NOTCH1, HDAC3, NRF1, SMARCC1, GTF2F2, TCF12, TCEANC, ELF2, FOXK1, ELF4, E2F6, FOXK…	1435	727	13528	1.452330	1.332446e-01	3.398936e-03	7.459567e-02
no Peak	covalent chromatin modification	30	0.15404365	4.186691e-05	SUPT3H, ING4, TADA3, HAT1, TADA1, CDC73, TRRAP, TAF5L, LEO1, TAF9, MYST2, MYST4, DNMT3A, CSRP2BP, KAT2B, EHMT1, CREBBP, UIMC1, EYA3, RPS6KA5, HDAC4, PHF17, HDAC3, TAF12, SAP130, WHSC1L1, PHF15, RNF20, SMARCA4, SUV420H1	1435	126	13528	2.244566	1.367041e-01	3.412717e-03	7.668113e-02
no Peak	phosphorylation	121	0.62130937	4.370352e-05	RNASEL, TBK1, STK35, CASK, PRKX, MAP3K7, TOP1, MAP3K5, APP, MDFIC, COL4A3BP, CLK4, PIK3C3, MLKL, FRS2, MAP2K6, PAN3, BRAF, ROCK1, ROCK2, WNK1, MAP4K3, CAMK4, SCYL2, PDGFRA, ATP5C1, MAPK9, NEK7, STK10, MAPKAPK5, MAPKAPK3, RIOK2, VRK1, SBK1, LMTK2, TNKS, DYRK2, RYK, MAP2K4, MOBKL1A, SMAD2, OXSR1, PTPN11, NDUFV3, EPHA4, SPTBN1, GRK5, TNK2, PIP4K2A, COX10, PIP5K1A, LATS1, ACVR1C, ACVR1B, NDUFS4, PAK4…	1435	800	13528	1.425861	1.422533e-01	3.481344e-03	8.004369e-02
no Peak	negative regulation of nucleobase, nucleoside, nucleotide and nucleic acid metabolic process	84	0.43132221	4.863278e-05	RSF1, FOXK1, ARID4A, E2F6, ZNF639, ZNF675, CBX3, ZNF202, CTCF, ZEB1, REST, RLIM, ZNF254, CBX5, IGHMBP2, KDM5B, AKIRIN2, MYST4, ATF7IP, KHDRBS1, TBL1XR1, SP100, ARID5B, GABPA, RBL1, ZHX2, MBD2, PKIA, FOXN3, MXD4, NCOA2, SMARCE1, BPTF, TRIM33, HIPK2, NAB1, MDM2, MDM4, COMMD7, SMARCA4, C1D, ZMYND11, ING4, BTAF1, GCLC, BLM, SNX6, PML, HAT1, ZNF177, ZC3H8, NR2C1, ZNF174, SUMO1, ORC2L, DRAP1, POU2F1, H…	1435	512	13528	1.546646	1.569709e-01	3.787340e-03	8.906792e-02
no Peak	RNA transport	25	0.12836970	5.533839e-05	ZC3H3, XPO1, NUP98, NUP160, NUP93, NUP210, QKI, TNKS, GLE1, NUP35, NUP133, UPF2, SMG6, CKAP5, FMR1, CASC3, NXF1, NUP155, NUPL1, ATXN2, TMEM48, NUP205, XPO7, THOC2, LRPPRC	1435	97	13528	2.429685	1.765879e-01	4.214971e-03	1.013429e-01
no Peak	establishment of RNA localization	25	0.12836970	5.533839e-05	ZC3H3, XPO1, NUP98, NUP160, NUP93, NUP210, QKI, TNKS, GLE1, NUP35, NUP133, UPF2, SMG6, CKAP5, FMR1, CASC3, NXF1, NUP155, NUPL1, ATXN2, TMEM48, NUP205, XPO7, THOC2, LRPPRC	1435	97	13528	2.429685	1.765879e-01	4.214971e-03	1.013429e-01
no Peak	nucleic acid transport	25	0.12836970	5.533839e-05	ZC3H3, XPO1, NUP98, NUP160, NUP93, NUP210, QKI, TNKS, GLE1, NUP35, NUP133, UPF2, SMG6, CKAP5, FMR1, CASC3, NXF1, NUP155, NUPL1, ATXN2, TMEM48, NUP205, XPO7, THOC2, LRPPRC	1435	97	13528	2.429685	1.765879e-01	4.214971e-03	1.013429e-01
no Peak	DNA repair	53	0.27214377	5.673767e-05	XRCC5, RAD51C, UVRAG, RPS27L, XRCC1, PMS2L3, IGHMBP2, EPC2, FANCF, POLG2, PMS1, DDB1, LIG1, LIG3, LIG4, C9ORF80, GTF2H1, EYA3, DCLRE1B, FBXO18, NHEJ1, RAD23B, BLM, WRNIP1, MGMT, POLA1, PML, PRKDC, UBE2V2, RRM2B, RPA3, PRPF19, RPA1, SUMO1, RAD51L1, HINFP, POLN, MSH2, SMC6, WRN, UIMC1, ATRX, POLD3, ATXN3, TDP1, BRE, SUPT16H, ALKBH1, CUL4B, PARP4, SMC1A, PARP1, BARD1	1435	284	13528	1.759297	1.806235e-01	4.229575e-03	1.039042e-01
no Peak	protein amino acid acetylation	17	0.08729140	5.928522e-05	SUPT3H, ING4, CSRP2BP, KAT2B, TADA3, CREBBP, HAT1, TADA1, TRRAP, PHF17, TAF5L, TAF12, SAP130, PHF15, TAF9, MYST2, MYST4	1435	52	13528	3.081962	1.879201e-01	4.327206e-03	1.085672e-01
no Peak	regulation of transcription, DNA-dependent	237	1.21694480	6.436047e-05	ZNF57, SNIP1, STAT5B, ZNF639, REST, MED21, ZNF253, ZNF254, MAGED1, APP, FLI1, MED27, CREB3L2, ZNF394, ZNF43, ZHX2, HMG20A, MED13, MTF1, MED17, ZNF383, PIAS2, ZNF41, TRAPPC2, TADA3, MYBL1, ZNF615, TCF20, DRAP1, ZNF71, DNMT3A, AEBP2, ZNF529, KLF12, KLF9, ZNF66, CREBBP, MAML2, SMAD2, TFCP2, ZNF626, NOTCH2, NOTCH1, ZNF212, TRPS1, TCF12, TCEANC, ELF2, ELF4, TBX21, ZNF675, ZEB1, ZNF14, ZBTB38, PMS2L3, …	1435	1773	13528	1.260147	2.022634e-01	4.601155e-03	1.178561e-01
no Peak	organelle fission	45	0.23106547	6.505406e-05	COX10, NEDD9, ANLN, ANAPC10, CDC16, LATS1, CD2AP, SPC24, FAM83D, NCAPG2, KATNA1, BUB1, SKA3, FBXO5, BUB3, VCPIP1, APC, ANAPC1, ANAPC2, ARHGEF2, DNM1L, OPA1, KIF11, PDS5A, CKAP5, TPX2, KIF18A, CENPF, NUSAP1, CDC23, NDC80, SUGT1, CEP63, CDC27, NCAPD2, NEDD1, NOLC1, C14ORF106, KIF20B, CLIP1, SETD8, ANAPC7, HAUS8, SMC1A, PPP5C	1435	229	13528	1.852502	2.042039e-01	4.557826e-03	1.191255e-01
no Peak	RNA processing	88	0.45186136	6.524281e-05	RNASEN, NAF1, RNASEL, CWC15, UTP15, SNRPD1, INTS1, RP9, ZNF638, SART3, ZNF346, SART1, SBDS, APP, DHX38, CTU1, CLP1, SFRS8, PCBP2, QKI, TGS1, CDK5RAP1, KHDRBS1, CLNS1A, SRPK2, MRPL1, ZCCHC11, EXOSC7, SARS, EXOSC2, MTPAP, PRPF3, RRP8, HNRNPR, SRPK1, TARBP1, PCF11, AQR, LARP7, TRMT12, TRUB1, THOC2, CPSF2, CPSF1, C1D, KIAA1429, ZC3H3, POLR2G, NHP2L1, FARS2, ERI1, DUSP11, SF3B3, RRAGC, ZFC3H1, EXOSC10…	1435	547	13528	1.516621	2.047311e-01	4.481594e-03	1.194710e-01
no Peak	regulation of RNA metabolic process	241	1.23748395	7.564711e-05	ZNF57, SNIP1, STAT5B, ZNF639, REST, MED21, ZNF253, ZNF254, MAGED1, APP, FLI1, MED27, CREB3L2, ZNF394, ZNF43, ZHX2, HMG20A, MED13, MTF1, MED17, ZNF383, PIAS2, ZNF41, TRAPPC2, TADA3, MYBL1, ZNF615, TCF20, DRAP1, ZNF71, DNMT3A, AEBP2, ZNF529, KLF12, KLF9, ZNF66, CREBBP, MAML2, SMAD2, TFCP2, ZNF626, NOTCH2, NOTCH1, ZNF212, TRPS1, TCF12, TCEANC, ELF2, ELF4, TBX21, ZNF675, ZEB1, ZNF14, ZBTB38, PMS2L3, …	1435	1813	13528	1.253144	2.332597e-01	5.094805e-03	1.385106e-01
no Peak	mRNA transport	23	0.11810013	7.858075e-05	ZC3H3, NUP133, XPO1, UPF2, NUP98, SMG6, NUP160, FMR1, NUP93, CASC3, NXF1, NUP155, NUPL1, TMEM48, NUP210, NUP205, QKI, TNKS, GLE1, THOC2, XPO7, NUP35, LRPPRC	1435	87	13528	2.492242	2.411172e-01	5.192282e-03	1.438784e-01
no Peak	negative regulation of nitrogen compound metabolic process	84	0.43132221	7.894709e-05	RSF1, FOXK1, ARID4A, E2F6, ZNF639, ZNF675, CBX3, ZNF202, CTCF, ZEB1, REST, RLIM, ZNF254, CBX5, IGHMBP2, KDM5B, AKIRIN2, MYST4, ATF7IP, KHDRBS1, TBL1XR1, SP100, ARID5B, GABPA, RBL1, ZHX2, MBD2, PKIA, FOXN3, MXD4, NCOA2, SMARCE1, BPTF, TRIM33, HIPK2, NAB1, MDM2, MDM4, COMMD7, SMARCA4, C1D, ZMYND11, ING4, BTAF1, GCLC, BLM, SNX6, PML, HAT1, ZNF177, ZC3H8, NR2C1, ZNF174, SUMO1, ORC2L, DRAP1, POU2F1, H…	1435	519	13528	1.525786	2.420927e-01	5.120073e-03	1.445487e-01
no Peak	regulation of cell cycle	59	0.30295250	7.918106e-05	CCNT2, XPO1, COPS5, STAT5B, RPS27L, CTCF, CDC16, ZZEF1, PTEN, LATS1, APP, CASP3, SBDS, FNTA, CDK5RAP1, MYC, DLG1, CDC7, ANAPC2, ROCK2, DDB1, NUSAP1, PKIA, FOXN3, GTF2H1, ADAM17, MDM2, SMARCA4, BLM, PML, ANLN, ANAPC10, TRRAP, PIN1, C12ORF11, CDC123, BUB1, CAMK2D, HINFP, FBXO5, THAP1, AATF, PGGT1B, BUB3, APC, PTPRC, MSH2, GMNN, CENPF, CDC23, PDE3A, CEP63, UIMC1, PTPN11, HDAC3, MAPK14, KIF20B, BRE, …	1435	331	13528	1.680373	2.427151e-01	5.042077e-03	1.449768e-01
no Peak	RNA localization	25	0.12836970	9.313167e-05	ZC3H3, XPO1, NUP98, NUP160, NUP93, NUP210, QKI, TNKS, GLE1, NUP35, NUP133, UPF2, SMG6, CKAP5, FMR1, CASC3, NXF1, NUP155, NUPL1, ATXN2, TMEM48, NUP205, XPO7, THOC2, LRPPRC	1435	100	13528	2.356794	2.789166e-01	5.822279e-03	1.704991e-01
no Peak	protein ubiquitination	28	0.14377407	9.855103e-05	CDC73, UBE2V2, UBE3C, PRPF19, FBXW7, UBE2D2, WWP2, MAP3K1, LEO1, FBXO4, FBXO3, UBE2D1, FBXW11, TRIP12, VCPIP1, HECTD1, RNF144B, VHL, DDB1, RBBP6, MIB1, TRIM33, FBXL5, MDM2, SIAH1, RNF20, BARD1, RNF41	1435	119	13528	2.218159	2.925085e-01	6.052307e-03	1.804121e-01
no Peak	cell death	109	0.55969191	1.001593e-04	MICB, MICA, FOXO3, CIAPIN1, CRADD, CTNNBL1, IGHMBP2, MAGED1, TOP1, MAP3K5, APP, CASP8AP2, TIAM1, TIA1, FAS, BCL7C, OPA1, ROCK1, SLC33A1, BCL2A1, OPTN, LIG4, BCAP31, TIAL1, PDCD6IP, TRAF2, AKAP13, ITGB2, BCL2L1, RRAGC, SLC11A2, ECE1, CSE1L, TRIM69, DYRK2, TRAF5, CKAP2, CFLAR, TM2D1, HTT, GARS, ALMS1, DUSP22, NIPA1, VAV1, TNFSF10, RHOT1, PARP4, DAP3, SGPP1, ZMAT3, ZNF346, PTEN, ACVR1C, BAG4, CASP3,…	1435	719	13528	1.429155	2.964926e-01	6.045050e-03	1.833537e-01
no Peak	protein modification by small protein conjugation	30	0.15404365	1.022514e-04	CDC73, NEDD8, UBE2V2, UBE3C, PRPF19, SUMO1, FBXW7, UBE2D2, WWP2, MAP3K1, LEO1, FBXO4, FBXO3, UBE2D1, FBXW11, TRIP12, VCPIP1, HECTD1, RNF144B, VHL, DDB1, RBBP6, MIB1, TRIM33, FBXL5, MDM2, SIAH1, RNF20, BARD1, RNF41	1435	132	13528	2.142540	3.016418e-01	6.066661e-03	1.871802e-01
no Peak	nucleobase, nucleoside, nucleotide and nucleic acid transport	27	0.13863928	1.030258e-04	ZC3H3, XPO1, NUP98, NUP160, NUP93, SLC23A2, NUP210, QKI, TNKS, GLE1, NUP35, NUP133, UPF2, SMG6, CKAP5, FMR1, CASC3, NXF1, NUP155, VDAC3, NUPL1, ATXN2, TMEM48, NUP205, THOC2, XPO7, LRPPRC	1435	113	13528	2.252511	3.035382e-01	6.010900e-03	1.885965e-01
no Peak	positive regulation of macromolecule metabolic process	126	0.64698331	1.077944e-04	STAT5B, CASK, CDC16, FOXO3, MED21, APP, FNTA, MDFIC, WIBG, AKIRIN2, MYST4, ANAPC1, ANAPC2, MED13, ARID1B, TRERF1, HIF1A, MTF1, MED17, PDGFRA, MAPK9, PIAS2, ANAPC7, RNF20, SMARCA4, GCLC, BLM, ANAPC10, PIN1, ECE1, BLOC1S2, PSMB1, PSMB2, FBXO5, TNKS, FBXO4, TAF9, DYRK2, UBE2D1, RUNX1, RUNX2, TAF2, KLF12, TAF8, CREBBP, MAML2, CDC23, SMAD2, CDC27, UIMC1, PSMB9, HDAC4, NOTCH1, SMARCC1, GTF2F2, TNK2, E2…	1435	857	13528	1.386026	3.151028e-01	6.185488e-03	1.973176e-01
no Peak	protein amino acid acylation	18	0.09242619	1.115818e-04	ZDHHC2, SUPT3H, ING4, CSRP2BP, KAT2B, TADA3, CREBBP, HAT1, TADA1, TRRAP, PHF17, TAF5L, TAF12, SAP130, PHF15, TAF9, MYST2, MYST4	1435	60	13528	2.828153	3.241510e-01	6.299199e-03	2.042438e-01
no Peak	negative regulation of biosynthetic process	90	0.46213094	1.278595e-04	RSF1, FOXK1, ARID4A, E2F6, ZNF639, ZNF675, CBX3, ZNF202, CTCF, ZEB1, REST, RLIM, ZNF254, CBX5, IGHMBP2, FNTA, TIA1, EIF2B3, KDM5B, AKIRIN2, MYST4, ATF7IP, PRKCA, KHDRBS1, TBL1XR1, SP100, ARID5B, GABPA, RBL1, ZHX2, IL6R, MBD2, PKIA, FOXN3, MXD4, NCOA2, SMARCE1, BPTF, TRIM33, HIPK2, NAB1, MDM2, MDM4, COMMD7, EIF2C3, SMARCA4, C1D, ZMYND11, ING4, BTAF1, GCLC, BLM, SNX6, PML, HAT1, ZNF177, ZC3H8, NR2C…	1435	573	13528	1.480709	3.616979e-01	7.100758e-03	2.340062e-01
no Peak	death	109	0.55969191	1.340226e-04	MICB, MICA, FOXO3, CIAPIN1, CRADD, CTNNBL1, IGHMBP2, MAGED1, TOP1, MAP3K5, APP, CASP8AP2, TIAM1, TIA1, FAS, BCL7C, OPA1, ROCK1, SLC33A1, BCL2A1, OPTN, LIG4, BCAP31, TIAL1, PDCD6IP, TRAF2, AKAP13, ITGB2, BCL2L1, RRAGC, SLC11A2, ECE1, CSE1L, TRIM69, DYRK2, TRAF5, CKAP2, CFLAR, TM2D1, HTT, GARS, ALMS1, DUSP22, NIPA1, VAV1, TNFSF10, RHOT1, PARP4, DAP3, SGPP1, ZMAT3, ZNF346, PTEN, ACVR1C, BAG4, CASP3,…	1435	724	13528	1.419285	3.753632e-01	7.325922e-03	2.452726e-01
no Peak	histone modification	28	0.14377407	1.536681e-04	SUPT3H, ING4, TADA3, HAT1, TADA1, CDC73, TRRAP, TAF5L, LEO1, TAF9, MYST2, MYST4, CSRP2BP, KAT2B, EHMT1, CREBBP, UIMC1, EYA3, RPS6KA5, HDAC4, PHF17, HDAC3, TAF12, SAP130, WHSC1L1, PHF15, RNF20, SUV420H1	1435	122	13528	2.163615	4.170013e-01	8.266723e-03	2.811778e-01
no Peak	positive regulation of apoptosis	71	0.36456996	1.661644e-04	ZMAT3, RPS27L, FOXO3, PTEN, CRADD, SART1, CTNNBL1, MAGED1, ACVR1B, MAP3K5, CASP3, APP, CUL5, NOD1, CASP8AP2, TIAM1, TIA1, CASP8, FAS, CASP1, CASP2, MYC, MAP2K6, RAB27A, PRKCA, ARHGEF2, AIFM1, ARHGEF6, IFI16, CD38, UNC13D, PSEN1, TIAL1, LYST, HIPK2, LCK, NAIF1, MAPK9, ING4, TRAF2, PML, AKAP13, PRKDC, RRM2B, BCL2L1, ZC3H8, GCH1, SOS1, MAP3K1, PPP3CC, AATF, DYRK2, APC, PTPRC, CFLAR, IL2RA, TM2D1, HT…	1435	430	13528	1.556581	4.420310e-01	8.801220e-03	3.040103e-01
no Peak	RNA biosynthetic process	53	0.27214377	1.697681e-04	CCNT2, TAF1C, E2F3, RSF1, ARID4A, COPS5, CRCP, GTF2E1, GTF2E2, TAF5L, HSF2, PRIM2, MED27, MYC, MTERF, BRF1, GABPA, MED13, GTF2H1, MED4, HIF1A, TAF12, GTF2I, MED17, ASH1L, SUPT3H, POLR2G, NMI, TCERG1, POU2F2, MLLT1, TCEA1, TAF9, GTF3C2, TRIP11, NFATC3, GTF3C4, NFATC1, TAF2, TAF4, TRIP4, POLR3K, NFRKB, AFF4, TRIM24, STAT1, MSL3, ZNF217, TRPS1, GTF2F2, SUPT16H, PARP1, NFIC	1435	296	13528	1.687974	4.490473e-01	8.857646e-03	3.105937e-01
no Peak	positive regulation of programmed cell death	71	0.36456996	2.038139e-04	ZMAT3, RPS27L, FOXO3, PTEN, CRADD, SART1, CTNNBL1, MAGED1, ACVR1B, MAP3K5, CASP3, APP, CUL5, NOD1, CASP8AP2, TIAM1, TIA1, CASP8, FAS, CASP1, CASP2, MYC, MAP2K6, RAB27A, PRKCA, ARHGEF2, AIFM1, ARHGEF6, IFI16, CD38, UNC13D, PSEN1, TIAL1, LYST, HIPK2, LCK, NAIF1, MAPK9, ING4, TRAF2, PML, AKAP13, PRKDC, RRM2B, BCL2L1, ZC3H8, GCH1, SOS1, MAP3K1, PPP3CC, AATF, DYRK2, APC, PTPRC, CFLAR, IL2RA, TM2D1, HT…	1435	433	13528	1.545796	5.111324e-01	1.046928e-02	3.727713e-01
no Peak	transcription from RNA polymerase II promoter	44	0.22593068	2.220143e-04	CCNT2, SUPT3H, POLR2G, TAF1C, E2F3, NMI, ARID4A, COPS5, GTF2E1, GTF2E2, TAF5L, TCERG1, HSF2, MED27, POU2F2, MLLT1, TCEA1, TAF9, NFATC3, TRIP11, MYC, NFATC1, TAF2, TAF4, TRIP4, NFRKB, GABPA, AFF4, MED13, TRIM24, STAT1, GTF2H1, MSL3, MED4, HIF1A, TAF12, GTF2I, MED17, TRPS1, GTF2F2, ASH1L, SUPT16H, NFIC, PARP1	1435	234	13528	1.772632	5.414008e-01	1.123466e-02	4.059954e-01
no Peak	transcription, DNA-dependent	52	0.26700899	2.259875e-04	CCNT2, TAF1C, E2F3, RSF1, ARID4A, COPS5, CRCP, GTF2E1, GTF2E2, TAF5L, HSF2, MED27, MYC, MTERF, BRF1, GABPA, MED13, GTF2H1, MED4, HIF1A, TAF12, GTF2I, MED17, ASH1L, SUPT3H, POLR2G, NMI, TCERG1, POU2F2, MLLT1, TCEA1, TAF9, GTF3C2, TRIP11, NFATC3, GTF3C4, NFATC1, TAF2, TAF4, TRIP4, POLR3K, NFRKB, AFF4, TRIM24, STAT1, MSL3, ZNF217, TRPS1, GTF2F2, SUPT16H, PARP1, NFIC	1435	292	13528	1.678812	5.477552e-01	1.127216e-02	4.132470e-01
no Peak	mitosis	42	0.21566110	2.260599e-04	NEDD9, ANLN, ANAPC10, CDC16, LATS1, CD2AP, SPC24, FAM83D, NCAPG2, KATNA1, BUB1, SKA3, FBXO5, BUB3, VCPIP1, APC, ANAPC1, ANAPC2, ARHGEF2, KIF11, PDS5A, CKAP5, TPX2, KIF18A, CENPF, CDC23, NUSAP1, NDC80, SUGT1, CEP63, CDC27, NCAPD2, NEDD1, NOLC1, C14ORF106, KIF20B, CLIP1, SETD8, ANAPC7, HAUS8, SMC1A, PPP5C	1435	220	13528	1.799734	5.478702e-01	1.111782e-02	4.133791e-01
no Peak	nuclear division	42	0.21566110	2.260599e-04	NEDD9, ANLN, ANAPC10, CDC16, LATS1, CD2AP, SPC24, FAM83D, NCAPG2, KATNA1, BUB1, SKA3, FBXO5, BUB3, VCPIP1, APC, ANAPC1, ANAPC2, ARHGEF2, KIF11, PDS5A, CKAP5, TPX2, KIF18A, CENPF, CDC23, NUSAP1, NDC80, SUGT1, CEP63, CDC27, NCAPD2, NEDD1, NOLC1, C14ORF106, KIF20B, CLIP1, SETD8, ANAPC7, HAUS8, SMC1A, PPP5C	1435	220	13528	1.799734	5.478702e-01	1.111782e-02	4.133791e-01
no Peak	regulation of ligase activity	21	0.10783055	2.317230e-04	ANAPC1, ANAPC2, CDC23, ANAPC10, CDC16, CDC27, PIN1, PSMB9, PSMF1, PSMB1, PSMD11, PSMD10, PSMB2, PSMD1, PSMD2, FBXO5, ANAPC7, UBE2D1, NHEJ1, ZER1, BUB3	1435	81	13528	2.444083	5.567733e-01	1.123741e-02	4.237141e-01
no Peak	positive regulation of cell death	71	0.36456996	2.332758e-04	ZMAT3, RPS27L, FOXO3, PTEN, CRADD, SART1, CTNNBL1, MAGED1, ACVR1B, MAP3K5, CASP3, APP, CUL5, NOD1, CASP8AP2, TIAM1, TIA1, CASP8, FAS, CASP1, CASP2, MYC, MAP2K6, RAB27A, PRKCA, ARHGEF2, AIFM1, ARHGEF6, IFI16, CD38, UNC13D, PSEN1, TIAL1, LYST, HIPK2, LCK, NAIF1, MAPK9, ING4, TRAF2, PML, AKAP13, PRKDC, RRM2B, BCL2L1, ZC3H8, GCH1, SOS1, MAP3K1, PPP3CC, AATF, DYRK2, APC, PTPRC, CFLAR, IL2RA, TM2D1, HT…	1435	435	13528	1.538689	5.591836e-01	1.115820e-02	4.265476e-01
no Peak	negative regulation of cellular biosynthetic process	87	0.44672657	2.587478e-04	RSF1, FOXK1, ARID4A, E2F6, ZNF639, ZNF675, CBX3, ZNF202, CTCF, ZEB1, REST, RLIM, ZNF254, CBX5, IGHMBP2, TIA1, EIF2B3, KDM5B, AKIRIN2, MYST4, ATF7IP, PRKCA, KHDRBS1, TBL1XR1, SP100, ARID5B, GABPA, RBL1, ZHX2, MBD2, PKIA, FOXN3, MXD4, NCOA2, SMARCE1, BPTF, TRIM33, HIPK2, NAB1, MDM2, MDM4, COMMD7, EIF2C3, SMARCA4, C1D, ZMYND11, ING4, BTAF1, GCLC, BLM, SNX6, PML, HAT1, ZNF177, ZC3H8, NR2C1, ZNF174, S…	1435	561	13528	1.461969	5.969043e-01	1.220306e-02	4.730193e-01
no Peak	mRNA metabolic process	62	0.31835687	2.998115e-04	RNASEL, CWC15, SNRPD1, SART1, AUH, APP, DHX38, PCBP3, WIBG, SFRS8, CLP1, PCBP2, QKI, TGS1, KIAA0427, CLNS1A, KHDRBS1, SRPK2, PAN3, BRF1, MTPAP, ZHX2, PRPF3, HNRNPR, SRPK1, PCF11, AQR, THOC2, CPSF2, CPSF1, EIF2C3, KIAA1429, ZC3H3, POLR2G, NHP2L1, SF3B3, PRPF19, EXOSC10, DDX46, FRG1, NUDT21, HNRNPD, PPIL3, RBM25, PRPF40A, SPOP, SFRS12, DHX8, UPF2, SMG6, GRSF1, ELAVL1, CASC3, DCP1B, PPP1R8, GTF2F2, …	1435	370	13528	1.579689	6.510393e-01	1.393922e-02	5.478933e-01
no Peak	negative regulation of ubiquitin-protein ligase activity during mitotic cell cycle	18	0.09242619	3.224437e-04	ANAPC1, ANAPC2, CDC23, ANAPC10, CDC16, CDC27, PSMB9, PSMF1, PSMB1, PSMD11, PSMD10, PSMB2, PSMD1, PSMD2, FBXO5, ANAPC7, UBE2D1, BUB3	1435	65	13528	2.610603	6.777032e-01	1.478802e-02	5.891374e-01
no Peak	M phase of mitotic cell cycle	42	0.21566110	3.349292e-04	NEDD9, ANLN, ANAPC10, CDC16, LATS1, CD2AP, SPC24, FAM83D, NCAPG2, KATNA1, BUB1, SKA3, FBXO5, BUB3, VCPIP1, APC, ANAPC1, ANAPC2, ARHGEF2, KIF11, PDS5A, CKAP5, TPX2, KIF18A, CENPF, CDC23, NUSAP1, NDC80, SUGT1, CEP63, CDC27, NCAPD2, NEDD1, NOLC1, C14ORF106, KIF20B, CLIP1, SETD8, ANAPC7, HAUS8, SMC1A, PPP5C	1435	224	13528	1.767596	6.915308e-01	1.515840e-02	6.118835e-01
no Peak	proteolysis	147	0.75481386	3.356712e-04	PPP2R5C, CDC16, CD2AP, CRADD, CNOT4, CUL5, WWP2, RNF149, ANAPC1, ANAPC2, F10, DTL, SOCS6, UBR1, SOCS5, NPEPPS, UBE2J2, BRAP, MIB1, TRIM33, FBXO18, FBXL5, PIAS2, ANAPC7, CPD, RNF20, ASB7, RAD23B, DERL2, ANAPC10, UBE2V2, NEDD8, FBXW7, C1ORF57, ECE1, UBE2D2, PSMB1, PSMB2, FBXO5, FBXW2, FBXO4, FBXO3, FBXO42, UBE2D1, FBXO45, FBXO8, FBXO46, HECTD1, SPOP, CFLAR, SEC11C, WDR7, CDC23, SUGT1, CDC27, PSMB9,…	1435	1054	13528	1.314796	6.923337e-01	1.499843e-02	6.132352e-01
no Peak	regulation of ubiquitin-protein ligase activity	20	0.10269576	3.961250e-04	ANAPC1, ANAPC2, CDC23, ANAPC10, CDC16, CDC27, PIN1, PSMB9, PSMF1, PSMB1, PSMD11, PSMD10, PSMB2, PSMD1, PSMD2, FBXO5, ANAPC7, UBE2D1, ZER1, BUB3	1435	78	13528	2.417225	7.511912e-01	1.745436e-02	7.232993e-01
no Peak	M phase	56	0.28754814	4.108545e-04	RAD51C, PRC1, OSGIN2, CDC16, CD2AP, LATS1, FAM83D, VCPIP1, ANAPC1, ANAPC2, ARHGEF2, KIF11, LIG3, TPX2, MND1, NUSAP1, NCAPD2, WBP2NL, C14ORF106, TOP3A, CLIP1, HAUS8, ANAPC7, PPP5C, CEP120, NEDD9, ANAPC10, ANLN, RPA1, SPC24, RAD51L1, NCAPG2, KATNA1, BUB1, SKA3, FBXO5, TNKS, BUB3, APC, PDS5A, MKI67, CKAP5, PCNT, KIF18A, CENPF, CDC23, NDC80, CEP63, SUGT1, CDC27, NEDD1, HDAC3, NOLC1, KIF20B, SETD8, SM…	1435	329	13528	1.604626	7.637362e-01	1.787342e-02	7.500987e-01
no Peak	negative regulation of ubiquitin-protein ligase activity	18	0.09242619	4.743091e-04	ANAPC1, ANAPC2, CDC23, ANAPC10, CDC16, CDC27, PSMB9, PSMF1, PSMB1, PSMD11, PSMD10, PSMB2, PSMD1, PSMD2, FBXO5, ANAPC7, UBE2D1, BUB3	1435	67	13528	2.532675	8.109407e-01	2.035413e-02	8.654728e-01
no Peak	negative regulation of ligase activity	18	0.09242619	4.743091e-04	ANAPC1, ANAPC2, CDC23, ANAPC10, CDC16, CDC27, PSMB9, PSMF1, PSMB1, PSMD11, PSMD10, PSMB2, PSMD1, PSMD2, FBXO5, ANAPC7, UBE2D1, BUB3	1435	67	13528	2.532675	8.109407e-01	2.035413e-02	8.654728e-01
no Peak	positive regulation of ligase activity	19	0.09756098	4.763708e-04	ANAPC1, ANAPC2, CDC23, ANAPC10, CDC16, CDC27, PSMB9, PIN1, PSMF1, PSMB1, PSMD11, PSMD10, PSMB2, PSMD1, PSMD2, FBXO5, ANAPC7, UBE2D1, NHEJ1	1435	73	13528	2.453649	8.123049e-01	2.019496e-02	8.692192e-01
no Peak	negative regulation of protein ubiquitination	19	0.09756098	5.681732e-04	ANAPC1, ANAPC2, GCLC, CDC23, ANAPC10, CDC16, CDC27, PSMB9, PSMF1, PSMB1, PSMD11, PSMD10, PSMB2, PSMD1, PSMD2, FBXO5, ANAPC7, UBE2D1, BUB3	1435	74	13528	2.420492	8.640439e-01	2.375455e-02	1.035905e+00
no Peak	induction of apoptosis	54	0.27727856	6.503703e-04	ZMAT3, RPS27L, FOXO3, PTEN, SART1, CRADD, MAGED1, ACVR1B, APP, CASP3, CUL5, MAP3K5, NOD1, CASP8AP2, TIAM1, TIA1, CASP8, FAS, CASP1, MYC, CASP2, RAB27A, PRKCA, ARHGEF2, AIFM1, ARHGEF6, IFI16, CD38, UNC13D, PSEN1, TIAL1, LYST, HIPK2, LCK, NAIF1, MAPK9, PML, AKAP13, RRM2B, GCH1, SOS1, AATF, DYRK2, CFLAR, TM2D1, HTT, STAT1, VAV1, TNFSF8, NCSTN, NOTCH2, TNFSF10, IKBKG, DAP3	1435	320	13528	1.590836	8.981438e-01	2.682638e-02	1.184926e+00
no Peak	induction of programmed cell death	54	0.27727856	7.025088e-04	ZMAT3, RPS27L, FOXO3, PTEN, SART1, CRADD, MAGED1, ACVR1B, APP, CASP3, CUL5, MAP3K5, NOD1, CASP8AP2, TIAM1, TIA1, CASP8, FAS, CASP1, MYC, CASP2, RAB27A, PRKCA, ARHGEF2, AIFM1, ARHGEF6, IFI16, CD38, UNC13D, PSEN1, TIAL1, LYST, HIPK2, LCK, NAIF1, MAPK9, PML, AKAP13, RRM2B, GCH1, SOS1, AATF, DYRK2, CFLAR, TM2D1, HTT, STAT1, VAV1, TNFSF8, NCSTN, NOTCH2, TNFSF10, IKBKG, DAP3	1435	321	13528	1.585880	9.151928e-01	2.861068e-02	1.279341e+00
no Peak	programmed cell death	91	0.46726573	7.148780e-04	SGPP1, ZMAT3, FOXO3, ZNF346, PTEN, CIAPIN1, CRADD, ACVR1C, CTNNBL1, MAGED1, BAG4, TOP1, MAP3K5, CASP3, APP, NOD1, CASP8AP2, GSN, TIAM1, TIA1, CASP8, FAS, CASP1, CASP2, MYC, NDUFS1, BCL7C, EBAG9, ARHGEF2, OPA1, ROCK1, AIFM1, ARHGEF6, BCL2A1, LIG4, BCAP31, PSEN1, TIAL1, HIPK3, HIPK2, LCK, NAIF1, SIAH1, PDCD6IP, MDM4, C3ORF38, C1D, ING4, POLR2G, TRAF2, XIAP, PML, GPR65, AKAP13, PRKDC, ITGB2, BCL2L1,…	1435	611	13528	1.404048	9.187995e-01	2.877367e-02	1.301728e+00
no Peak	positive regulation of ubiquitin-protein ligase activity	18	0.09242619	8.158098e-04	ANAPC1, ANAPC2, CDC23, ANAPC10, CDC16, CDC27, PSMB9, PIN1, PSMF1, PSMB1, PSMD11, PSMD10, PSMB2, PSMD1, PSMD2, FBXO5, ANAPC7, UBE2D1	1435	70	13528	2.424131	9.430441e-01	3.240002e-02	1.484220e+00
no Peak	nucleocytoplasmic transport	31	0.15917843	8.807242e-04	ZC3H3, XPO1, NUP98, NUP160, PML, CCHCR1, CSE1L, ZFYVE9, ANP32A, PPP3CB, GLE1, TNPO1, NUP133, UPF2, SMG6, HTT, IPO8, NXF1, NUP155, ATXN1, CAMK4, GSK3B, NUP205, TRPS1, IPO5, ZNF384, SPTBN1, KPNA5, THOC2, KPNA3, XPO7	1435	156	13528	1.873349	9.546609e-01	3.454364e-02	1.601421e+00
no Peak	transcription initiation	20	0.10269576	9.026911e-04	TAF2, POLR2G, E2F3, TAF4, RSF1, BRF1, TRIM24, MED13, GTF2H1, GTF2E1, GTF2E2, MED4, TAF12, GTF2I, MED17, MED27, GTF2F2, TAF9, MYC, GTF3C4	1435	83	13528	2.271609	9.580291e-01	3.499958e-02	1.641052e+00
no Peak	regulation of apoptosis	114	0.58536585	9.213095e-04	XRCC5, STAT5B, INTS1, RPS27L, FOXO3, CIAPIN1, SART1, CRADD, CTNNBL1, MAP3K7, MAGED1, MAP3K5, BDNF, APP, CUL5, FNTA, CASP8AP2, TIAM1, TIA1, FAS, MAP2K6, RAB27A, BRAF, ROCK1, ACTN4, BCL2A1, ACTN1, LIG4, CD38, UNC13D, TIAL1, LYST, MAPK9, MYO18A, TRAF2, GCLC, PAFAH2, AKAP13, BCL2L1, RRM2B, ZC3H8, SLC11A2, BLOC1S2, TAF9, DYRK2, TRAF5, CFLAR, TM2D1, HTT, WRN, VAV1, ATP7A, ATF5, NOTCH2, NOTCH1, TNFSF10,…	1435	804	13528	1.336689	9.606873e-01	3.531907e-02	1.674630e+00
no Peak	regulation of ubiquitin-protein ligase activity during mitotic cell cycle	18	0.09242619	9.686021e-04	ANAPC1, ANAPC2, CDC23, ANAPC10, CDC16, CDC27, PSMB9, PSMF1, PSMB1, PSMD11, PSMD10, PSMB2, PSMD1, PSMD2, FBXO5, ANAPC7, UBE2D1, BUB3	1435	71	13528	2.389989	9.667071e-01	3.669878e-02	1.759872e+00
no Peak	RNA catabolic process	17	0.08729140	9.835287e-04	RNASEN, UPF2, PAN3, ZCCHC11, SMG6, EXOSC7, ZHX2, CASC3, OAS2, AUH, EXOSC10, PPP1R8, DCP1B, WIBG, HNRNPD, EIF2C3, KIAA0427	1435	65	13528	2.465570	9.684085e-01	3.685655e-02	1.786762e+00
no Peak	anaphase-promoting complex-dependent proteasomal ubiquitin-dependent protein catabolic process	17	0.08729140	9.835287e-04	ANAPC1, ANAPC2, CDC23, ANAPC10, CDC16, CDC27, PSMB9, PSMF1, PSMB1, PSMD11, PSMD10, PSMB2, PSMD1, PSMD2, ANAPC7, UBE2D1, BUB3	1435	65	13528	2.465570	9.684085e-01	3.685655e-02	1.786762e+00
no Peak	apoptosis	89	0.45699615	1.044897e-03	SGPP1, ZMAT3, FOXO3, ZNF346, PTEN, CIAPIN1, CRADD, ACVR1C, CTNNBL1, MAGED1, BAG4, MAP3K5, CASP3, APP, NOD1, CASP8AP2, GSN, TIAM1, TIA1, CASP8, FAS, CASP1, CASP2, MYC, NDUFS1, BCL7C, EBAG9, ARHGEF2, OPA1, ROCK1, AIFM1, ARHGEF6, BCL2A1, LIG4, BCAP31, PSEN1, TIAL1, HIPK3, HIPK2, LCK, NAIF1, SIAH1, PDCD6IP, MDM4, C3ORF38, C1D, ING4, POLR2G, TRAF2, XIAP, PML, GPR65, AKAP13, ITGB2, BCL2L1, RRAGC, SLC11…	1435	602	13528	1.393719	9.745375e-01	3.869956e-02	1.897242e+00
no Peak	nuclear transport	31	0.15917843	1.090871e-03	ZC3H3, XPO1, NUP98, NUP160, PML, CCHCR1, CSE1L, ZFYVE9, ANP32A, PPP3CB, GLE1, TNPO1, NUP133, UPF2, SMG6, HTT, IPO8, NXF1, NUP155, ATXN1, CAMK4, GSK3B, NUP205, TRPS1, IPO5, ZNF384, SPTBN1, KPNA5, THOC2, KPNA3, XPO7	1435	158	13528	1.849636	9.783368e-01	3.994761e-02	1.979932e+00
no Peak	protein import into nucleus, docking	8	0.04107831	1.103625e-03	XPO1, NUP98, CSE1L, NUP205, IPO5, IPO8, XPO7, TNPO1	1435	17	13528	4.436319	9.792865e-01	3.998866e-02	2.002860e+00
no Peak	Golgi vesicle transport	27	0.13863928	1.171172e-03	CLTA, SEC24B, STX8, PLDN, SEC24A, SEC31A, NAPG, AP1G1, COPZ1, RAB3IP, GBF1, KIAA1012, STX16, SEC22A, SEC22C, VPS13A, SNAP23, EXOC5, GOLGA3, ARL1, HTT, OPTN, COG3, GOSR1, TRAPPC3, SPAST, TRAPPC2	1435	131	13528	1.943006	9.836642e-01	4.195284e-02	2.124204e+00
no Peak	regulation of mitotic cell cycle	30	0.15404365	1.210858e-03	STAT5B, PML, RPS27L, ANAPC10, ANLN, CDC16, TRRAP, ZZEF1, PIN1, SBDS, APP, C12ORF11, CDC123, BUB1, CAMK2D, FBXO5, AATF, THAP1, MYC, BUB3, DLG1, APC, CENPF, CDC23, NUSAP1, PKIA, HDAC3, KIF20B, MDM2, SMARCA4	1435	152	13528	1.860627	9.857913e-01	4.290691e-02	2.195431e+00
no Peak	response to cytokine stimulus	19	0.09756098	1.290478e-03	PRKCA, IRAK2, ADAM10, SP100, PML, CALCOCO2, IL6R, BCL2L1, STAT1, GCH1, HDAC4, CD38, CASP3, FNTA, CASP8, PDGFRA, PPP3CB, TAF9, PGGT1B	1435	79	13528	2.267296	9.892602e-01	4.520939e-02	2.338184e+00
no Peak	RNA 3'-end processing	10	0.05134788	1.310215e-03	ZC3H3, APP, ZCCHC11, CLP1, GRSF1, INTS1, ERI1, PAPOLG, CSTF1, CPSF1	1435	27	13528	3.491547	9.899801e-01	4.543235e-02	2.373539e+00
no Peak	organelle localization	21	0.10783055	1.328294e-03	CEP120, COPZ1, KIF18A, CENPF, CDC23, NUSAP1, NDC80, HOOK3, MFN2, BBS2, KIF1B, PEX1, PSEN1, GBF1, CENPA, RHOT1, MKKS, PEX13, SNAP23, LRPPRC, RAB27A	1435	92	13528	2.151856	9.905971e-01	4.559523e-02	2.405916e+00
no Peak	protein localization in organelle	29	0.14890886	1.343020e-03	XPO1, NUP98, TIMM17A, MTX2, PML, RAB3IP, IMMP2L, TOMM7, CSE1L, ZFYVE9, PPP3CB, TNPO1, SRP54, TAF3, HTT, IPO8, OPTN, MFN2, COG3, BBS2, TOMM70A, NUP205, TRPS1, IPO5, TOMM20, SPTBN1, KPNA5, KPNA3, XPO7	1435	146	13528	1.872522	9.910716e-01	4.564347e-02	2.432280e+00
no Peak	regulation of programmed cell death	114	0.58536585	1.350504e-03	XRCC5, STAT5B, INTS1, RPS27L, FOXO3, CIAPIN1, SART1, CRADD, CTNNBL1, MAP3K7, MAGED1, MAP3K5, BDNF, APP, CUL5, FNTA, CASP8AP2, TIAM1, TIA1, FAS, MAP2K6, RAB27A, BRAF, ROCK1, ACTN4, BCL2A1, ACTN1, LIG4, CD38, UNC13D, TIAL1, LYST, MAPK9, MYO18A, TRAF2, GCLC, PAFAH2, AKAP13, BCL2L1, RRM2B, ZC3H8, SLC11A2, BLOC1S2, TAF9, DYRK2, TRAF5, CFLAR, TM2D1, HTT, WRN, VAV1, ATP7A, ATF5, NOTCH2, NOTCH1, TNFSF10,…	1435	812	13528	1.323520	9.913034e-01	4.545251e-02	2.445675e+00
no Peak	negative regulation of RNA metabolic process	58	0.29781772	1.445842e-03	RSF1, ARID4A, FOXK1, E2F6, ZNF639, CBX3, ZNF675, CTCF, ZNF202, REST, ZEB1, ZNF254, CBX5, IGHMBP2, KDM5B, ATF7IP, TBL1XR1, SP100, ARID5B, GABPA, RBL1, ZHX2, MBD2, PKIA, FOXN3, MXD4, NCOA2, BPTF, SMARCE1, HIPK2, MDM2, MDM4, SMARCA4, ZMYND11, ING4, HAT1, ZNF177, ZNF174, NR2C1, ORC2L, DRAP1, POU2F1, PEX14, GFI1, DNMT3A, EHMT1, KLF12, VHL, JARID2, SMAD2, TRIM24, HDAC4, HDAC3, TRPS1, IRF2, NFIC, TBL1X,…	1435	362	13528	1.510432	9.937802e-01	4.812412e-02	2.616172e+00
no Peak	regulation of cell death	114	0.58536585	1.511196e-03	XRCC5, STAT5B, INTS1, RPS27L, FOXO3, CIAPIN1, SART1, CRADD, CTNNBL1, MAP3K7, MAGED1, MAP3K5, BDNF, APP, CUL5, FNTA, CASP8AP2, TIAM1, TIA1, FAS, MAP2K6, RAB27A, BRAF, ROCK1, ACTN4, BCL2A1, ACTN1, LIG4, CD38, UNC13D, TIAL1, LYST, MAPK9, MYO18A, TRAF2, GCLC, PAFAH2, AKAP13, BCL2L1, RRM2B, ZC3H8, SLC11A2, BLOC1S2, TAF9, DYRK2, TRAF5, CFLAR, TM2D1, HTT, WRN, VAV1, ATP7A, ATF5, NOTCH2, NOTCH1, TNFSF10,…	1435	815	13528	1.318648	9.950572e-01	4.977453e-02	2.732884e+00
no Peak	DNA replication	35	0.17971759	1.547288e-03	ING4, FHIT, NUP98, BLM, LIN9, WRNIP1, POLA1, RRM2B, RPA3, IGHMBP2, RPA1, TOP1, ORC2L, ORC4L, PRIM2, POLN, POLG2, MYST2, DNAJC2, CDC7, DTL, LIG1, LIG3, CENPF, WRN, LIG4, MCM3, RMI1, POLD3, RRM2, RRM1, SUPT16H, TOP3A, ORC5L, NFIC	1435	190	13528	1.736585	9.956463e-01	5.046076e-02	2.797282e+00
no Peak	regulation of protein ubiquitination	22	0.11296534	1.618179e-03	ANAPC1, ANAPC2, GCLC, CDC23, ANAPC10, CDC16, CDC27, PIN1, PSMB9, PSMF1, PSMB1, PSMD11, PSMD10, PSMB2, PSMD1, PSMD2, FBXO5, FBXO4, ANAPC7, UBE2D1, ZER1, BUB3	1435	100	13528	2.073979	9.966070e-01	5.222844e-02	2.923654e+00
no Peak	negative regulation of transcription, DNA-dependent	57	0.29268293	1.635538e-03	RSF1, ARID4A, FOXK1, E2F6, ZNF639, CBX3, ZNF675, CTCF, ZNF202, REST, ZEB1, ZNF254, CBX5, IGHMBP2, KDM5B, ATF7IP, TBL1XR1, SP100, ARID5B, GABPA, RBL1, ZHX2, MBD2, PKIA, FOXN3, MXD4, NCOA2, BPTF, SMARCE1, HIPK2, MDM2, MDM4, SMARCA4, ZMYND11, ING4, HAT1, ZNF177, ZNF174, NR2C1, ORC2L, DRAP1, POU2F1, PEX14, GFI1, DNMT3A, EHMT1, KLF12, VHL, JARID2, SMAD2, TRIM24, HDAC4, HDAC3, TRPS1, IRF2, NFIC, TBL1X	1435	356	13528	1.509408	9.968079e-01	5.229403e-02	2.954574e+00
no Peak	positive regulation of ubiquitin-protein ligase activity during mitotic cell cycle	17	0.08729140	1.644529e-03	ANAPC1, ANAPC2, CDC23, ANAPC10, CDC16, CDC27, PSMB9, PSMF1, PSMB1, PSMD11, PSMD10, PSMB2, PSMD1, PSMD2, FBXO5, ANAPC7, UBE2D1	1435	68	13528	2.356794	9.969072e-01	5.210015e-02	2.970586e+00
no Peak	mitochondrion organization	27	0.13863928	2.535315e-03	COX10, TIMM17A, MTX2, BCL2L1, RRM2B, IMMP2L, CASP3, TOMM7, NDUFS4, MAP3K1, COL4A3BP, NDUFS8, COX18, MYC, MTERF, OPA1, DNM1L, HTT, TMEM70, ATP7A, MFN2, MAN2A1, LETM1, NRF1, TOMM70A, TOMM20, DAP3	1435	138	13528	1.844448	9.998653e-01	7.851498e-02	4.544619e+00
no Peak	protein import	26	0.13350449	2.535801e-03	XPO1, NUP98, TIMM17A, MTX2, PML, IMMP2L, TOMM7, PEX1, CSE1L, ZFYVE9, PPP3CB, PEX14, PEX13, TNPO1, HTT, IPO8, MFN2, TOMM70A, NUP205, TRPS1, IPO5, TOMM20, SPTBN1, KPNA5, KPNA3, XPO7	1435	131	13528	1.871043	9.998656e-01	7.784408e-02	4.545472e+00
no Peak	positive regulation of protein ubiquitination	19	0.09756098	2.676544e-03	ANAPC1, ANAPC2, CDC23, ANAPC10, CDC16, CDC27, PSMB9, PIN1, PSMF1, PSMB1, PSMD11, PSMD10, PSMB2, PSMD1, PSMD2, FBXO5, FBXO4, ANAPC7, UBE2D1	1435	84	13528	2.132338	9.999181e-01	8.128036e-02	4.791945e+00
no Peak	oxidative phosphorylation	21	0.10783055	2.942797e-03	NDUFB3, TCIRG1, NDUFB5, NDUFA8, MSH2, COX10, ATP5F1, ATP6V1H, NDUFC1, NDUFA10, ATP5G3, NDUFV3, ATP6V1A, NDUFS4, UQCRH, NDUFS8, ATP5C1, ATP5A1, NDUFS1, UQCRB, ATP5J	1435	98	13528	2.020110	9.999679e-01	8.824817e-02	5.256571e+00
no Peak	induction of apoptosis by extracellular signals	23	0.11810013	3.087701e-03	PRKCA, CFLAR, ARHGEF2, TM2D1, ARHGEF6, AKAP13, VAV1, CRADD, MAGED1, NCSTN, CD38, MAP3K5, CASP3, PSEN1, CASP8AP2, TIAM1, SOS1, CASP8, MAPK9, AATF, FAS, CASP2, DAP3	1435	112	13528	1.935938	9.999807e-01	9.161388e-02	5.508535e+00
no Peak	negative regulation of protein modification process	24	0.12323492	3.122735e-03	PRKCA, ANAPC1, PTPRC, ANAPC2, GCLC, CDC23, ANAPC10, CDC16, CDC27, PSMB9, PSMF1, G6PD, PSEN1, PSMB1, PSMD11, PSMD10, PSMB2, PSMD1, PSMD2, FBXO5, ANAPC7, UBE2D1, FAM129A, BUB3	1435	119	13528	1.901280	9.999830e-01	9.183141e-02	5.569358e+00
no Peak	G2 phase of mitotic cell cycle	5	0.02567394	3.380726e-03	APP, BLM, CENPF, DNAJC2, FOXN3	1435	7	13528	6.733698	9.999931e-01	9.822469e-02	6.016120e+00
no Peak	G2 phase	5	0.02567394	3.380726e-03	APP, BLM, CENPF, DNAJC2, FOXN3	1435	7	13528	6.733698	9.999931e-01	9.822469e-02	6.016120e+00
no Peak	ER to Golgi vesicle-mediated transport	12	0.06161746	3.514796e-03	COG3, SEC24B, SEC24A, SEC31A, HTT, KIAA1012, SEC22A, SEC22C, GOSR1, TRAPPC3, SPAST, TRAPPC2	1435	42	13528	2.693479	9.999957e-01	1.010884e-01	6.247501e+00
no Peak	protein targeting	37	0.18998716	3.702651e-03	XPO1, NUP98, TIMM17A, MTX2, HPS4, PML, SEC62, SSR1, CCHCR1, IMMP2L, TOMM7, CSE1L, PEX1, ZFYVE9, PPP3CB, PEX14, PEX13, TNPO1, AP3B1, RAB27A, SRP54, HTT, OPTN, IPO8, MFN2, ERBB2IP, ATG4C, TOMM70A, GSK3B, NUP205, TRPS1, IPO5, TOMM20, SPTBN1, KPNA5, XPO7, KPNA3	1435	215	13528	1.622352	9.999978e-01	1.053453e-01	6.570797e+00
no Peak	DNA damage response, signal transduction	18	0.09242619	3.799716e-03	ING4, SP100, BLM, MSH2, AIFM1, PML, RPS27L, IFI16, CEP63, FOXN3, UIMC1, PTPN11, MAPK14, HIPK2, HINFP, BRE, DYRK2, SMC1A	1435	80	13528	2.121115	9.999984e-01	1.070931e-01	6.737431e+00
no Peak	regulation of cell cycle process	23	0.11810013	3.868757e-03	CDC7, XPO1, PTPRC, ROCK2, PML, CENPF, CDC23, NUSAP1, CTCF, PDE3A, ANAPC10, ANLN, CDC16, ZZEF1, PKIA, PIN1, SBDS, BUB1, KIF20B, CAMK2D, FBXO5, SMARCA4, APC	1435	114	13528	1.901974	9.999988e-01	1.080685e-01	6.855786e+00
no Peak	negative regulation of protein kinase activity	19	0.09756098	3.989937e-03	PRKCA, PTPRC, SNX6, HMGCR, NF1, DUSP22, ZNF675, PKIB, MBIP, PKIA, LATS1, CASP3, PSEN1, RGS3, HIPK3, ZFYVE28, MLLT1, CDK5RAP1, APC	1435	87	13528	2.058809	9.999992e-01	1.103903e-01	7.063175e+00
no Peak	mRNA catabolic process	12	0.06161746	4.279465e-03	EXOSC10, UPF2, PAN3, SMG6, DCP1B, WIBG, ZHX2, HNRNPD, CASC3, EIF2C3, KIAA0427, AUH	1435	43	13528	2.630840	9.999997e-01	1.170103e-01	7.556914e+00
no Peak	peptidyl-threonine modification	8	0.04107831	4.514404e-03	PRKCA, GALNT2, ACVR1B, GALNT1, SBK1, NLK, HIPK3, TNKS	1435	21	13528	3.591306	9.999999e-01	1.220914e-01	7.955736e+00
no Peak	posttranscriptional regulation of gene expression	36	0.18485237	4.860037e-03	EIF4E3, METAP1, NAPG, HPS4, PML, PRKDC, PTEN, APP, EIF3B, STX12, EIF3H, WIBG, TIA1, MTPN, CLP1, HNRNPD, QKI, TNRC6B, FAM129A, EIF2B3, KIAA0427, PRKCA, BRF1, ZCCHC11, VHL, IREB2, ELAVL1, SMAD2, CASC3, COG3, ATXN2, EIF4E, NCK1, MDM4, EEFSEC, EIF2C3	1435	211	13528	1.608428	1.000000e+00	1.298299e-01	8.539513e+00
no Peak	establishment of organelle localization	16	0.08215661	5.078301e-03	COPZ1, KIF18A, NUSAP1, CDC23, CENPF, NDC80, BBS2, KIF1B, PSEN1, GBF1, CENPA, RHOT1, MKKS, SNAP23, LRPPRC, RAB27A	1435	69	13528	2.186012	1.000000e+00	1.342473e-01	8.906358e+00
no Peak	positive regulation of transcription	80	0.41078306	5.650639e-03	E2F3, RSF1, FOXK1, ELF4, STAT5B, CASK, CTCF, ZEB1, FOXO3, MED21, SKAP1, ZBTB38, APP, MDFIC, MKL2, MYC, AKIRIN2, MYST4, SERTAD2, ATF7IP, TBL1XR1, SP100, BRF1, FOXJ2, MED13, ARID1B, TRERF1, GTF2H1, MED6, NCOA2, HIF1A, MTF1, BPTF, MED17, HIPK2, PIAS2, RNF20, TBX19, SMARCA4, ACVR1, SMARCAD1, BLM, PPM1A, PRKDC, NFYC, NFYB, TNFRSF1A, RGMB, BLOC1S2, MAP3K1, HINFP, POU2F1, TCEA1, TAF9, AATF, RUNX1, NFATC…	1435	564	13528	1.337188	1.000000e+00	1.471446e-01	9.861712e+00
no Peak	negative regulation of kinase activity	19	0.09756098	5.794714e-03	PRKCA, PTPRC, SNX6, HMGCR, NF1, DUSP22, ZNF675, PKIB, MBIP, PKIA, LATS1, CASP3, PSEN1, RGS3, HIPK3, ZFYVE28, MLLT1, CDK5RAP1, APC	1435	90	13528	1.990182	1.000000e+00	1.495076e-01	1.010071e+01
no Peak	positive regulation of gene expression	82	0.42105263	5.820901e-03	E2F3, RSF1, FOXK1, ELF4, STAT5B, CASK, CTCF, ZEB1, FOXO3, MED21, SKAP1, ZBTB38, APP, MDFIC, MKL2, MYC, AKIRIN2, MYST4, SERTAD2, ATF7IP, TBL1XR1, SP100, BRF1, FOXJ2, MED13, ARID1B, TRERF1, GTF2H1, MED6, NCOA2, HIF1A, MTF1, BPTF, MED17, HIPK2, MAPK9, PIAS2, RNF20, TBX19, SMARCA4, ACVR1, SMARCAD1, BLM, PPM1A, PRKDC, NFYC, NFYB, TNFRSF1A, RGMB, BLOC1S2, MAP3K1, HINFP, POU2F1, TCEA1, TAF9, AATF, RUNX1…	1435	581	13528	1.330514	1.000000e+00	1.490423e-01	1.014408e+01
no Peak	positive regulation of nucleobase, nucleoside, nucleotide and nucleic acid metabolic process	87	0.44672657	6.297092e-03	E2F3, RSF1, FOXK1, ELF4, TBX21, STAT5B, CASK, CTCF, ZEB1, FOXO3, MED21, SKAP1, ZBTB38, APP, MDFIC, MKL2, MYC, AKIRIN2, MYST4, SERTAD2, ATF7IP, TBL1XR1, SP100, BRF1, FOXJ2, MED13, ARID1B, TRERF1, GTF2H1, MED6, EYA3, NCOA2, HIF1A, MTF1, BPTF, MED17, HIPK2, PDGFRA, PIAS2, RNF20, TBX19, SMARCA4, ACVR1, SMARCAD1, BLM, PPM1A, NFYC, PRKDC, NFYB, TNFRSF1A, RGMB, BLOC1S2, MAP3K1, HINFP, POU2F1, TNKS, TCEA…	1435	624	13528	1.314366	1.000000e+00	1.590923e-01	1.092939e+01
no Peak	RNA splicing	45	0.23106547	6.362534e-03	POLR2G, NHP2L1, CWC15, SNRPD1, RP9, ZNF638, SART1, SF3B3, RRAGC, PRPF19, DDX46, DHX38, FRG1, SFRS8, CLP1, PCBP2, NUDT21, HNRNPD, QKI, PPIL3, TGS1, RBM25, PRPF40A, SFRS12, DHX8, CLNS1A, SRPK2, PRPF3, CASC3, HNRNPR, SRPK1, PCF11, PPIG, AQR, PPP1R8, GTF2F2, LSM10, THOC2, SNRNP27, SMC1A, CWC22, CSTF1, CPSF2, CPSF1, KIAA1429	1435	284	13528	1.493743	1.000000e+00	1.594700e-01	1.103680e+01
no Peak	T cell activation	24	0.12323492	6.480404e-03	PTPRC, MICB, MICA, BLM, ELF4, STAT5B, PRKDC, PTPN22, LIG4, VAV1, CD48, ATP7A, DOCK2, PKNOX1, PSEN1, NCK1, LCK, PPP3CB, ADAM17, FAS, NHEJ1, DPP4, RAB27A, APC	1435	126	13528	1.795653	1.000000e+00	1.610384e-01	1.122996e+01
no Peak	cell cycle checkpoint	19	0.09756098	6.526618e-03	BLM, MSH2, DDB1, PML, CENPF, RPS27L, TRRAP, CEP63, FOXN3, UIMC1, PTPN11, MAPK14, BRE, HINFP, BUB1, SMC1A, BUB3, APC, DLG1	1435	91	13528	1.968312	1.000000e+00	1.609598e-01	1.130558e+01
no Peak	protein amino acid phosphorylation	92	0.47240051	6.646775e-03	RNASEL, TBK1, STK35, CASK, LATS1, PRKX, ACVR1C, MAP3K7, ACVR1B, MAP3K5, APP, MDFIC, COL4A3BP, PAK4, CLK4, PIK3C3, EEF2K, MLKL, FRS2, MAP2K6, IRAK2, PRKCA, CDC7, SRPK2, PAN3, ADAM10, SGK3, BRAF, ROCK1, ROCK2, CDK8, WNK1, PKN2, DGUOK, SRPK1, TBCK, PRKCB, TYK2, MAP4K3, SGK196, PSEN1, CAMK4, SCYL2, HIPK3, HIPK2, LCK, PDGFRA, MAPK9, TXK, NEK7, ACVR1, STK10, CAMK2G, MAPKAPK5, PML, MAPKAPK3, PRKDC, RIOK…	1435	667	13528	1.300300	1.000000e+00	1.625421e-01	1.150192e+01
no Peak	DNA-dependent DNA replication	14	0.07188703	6.721570e-03	BLM, POLA1, RRM2B, WRN, MCM3, POLD3, RPA1, TOP1, ORC2L, ORC4L, PRIM2, TOP3A, ORC5L, POLG2	1435	58	13528	2.275526	1.000000e+00	1.630897e-01	1.162393e+01
no Peak	T cell differentiation	15	0.07702182	7.258778e-03	PTPRC, BLM, STAT5B, PRKDC, PTPN22, LIG4, ATP7A, DOCK2, PKNOX1, LCK, PPP3CB, ADAM17, FAS, NHEJ1, APC	1435	65	13528	2.175503	1.000000e+00	1.737720e-01	1.249560e+01
no Peak	negative regulation of molecular function	51	0.26187420	7.491859e-03	RSF1, HMGCR, ZNF675, INTS1, MBIP, CDC16, LATS1, NOD2, CASP3, WWP2, PSMD1, PSMD2, CAT, CDK5RAP1, IRAK2, ANAPC1, PRKCA, ANAPC2, SP100, PKIB, PKIA, PSEN1, HIPK3, ZFYVE28, ANAPC7, COMMD7, SNX6, ANAPC10, PSMF1, SUMO1, PSMB1, PSMB2, PEX14, FBXO5, MLLT1, TNKS, GFI1, UBE2D1, BUB3, APC, PTPRC, NF1, CDC23, DUSP22, CDC27, PSMB9, ATP7A, HDAC4, PSMD11, RGS3, PSMD10	1435	334	13528	1.439479	1.000000e+00	1.776403e-01	1.287125e+01
no Peak	glycoprotein biosynthetic process	28	0.14377407	8.373630e-03	GALNT2, OSTC, GALNT1, GALNT7, FUT8, ALG2, LOC402377, ST8SIA1, ALG5, DSE, HS2ST1, STT3A, POMT1, B3GNT2, RPN2, SDF2, ST6GAL1, LIPA, MAN1A2, FUT11, PMM2, ATP7A, COG3, MAN2A1, PSEN1, CHST7, ST8SIA4, EXT1	1435	158	13528	1.670639	1.000000e+00	1.951387e-01	1.427866e+01
no Peak	mRNA processing	49	0.25160462	8.871360e-03	RNASEL, CWC15, SNRPD1, SART1, APP, DHX38, SFRS8, CLP1, PCBP2, QKI, TGS1, CLNS1A, KHDRBS1, SRPK2, MTPAP, PRPF3, HNRNPR, SRPK1, PCF11, AQR, THOC2, CPSF2, CPSF1, KIAA1429, ZC3H3, POLR2G, NHP2L1, SF3B3, PRPF19, DDX46, FRG1, NUDT21, HNRNPD, PPIL3, RBM25, SPOP, SFRS12, PRPF40A, DHX8, GRSF1, CASC3, PPP1R8, GTF2F2, LSM10, PAPOLG, SMC1A, CWC22, SNRNP27, CSTF1	1435	321	13528	1.439040	1.000000e+00	2.041681e-01	1.506358e+01
no Peak	transcription initiation from RNA polymerase II promoter	15	0.07702182	1.087310e-02	TAF2, POLR2G, TAF4, E2F3, MED13, GTF2H1, GTF2E1, GTF2E2, MED4, TAF12, GTF2I, MED17, MED27, GTF2F2, TAF9	1435	68	13528	2.079524	1.000000e+00	2.428158e-01	1.815222e+01
no Peak	intra-Golgi vesicle-mediated transport	7	0.03594352	1.129497e-02	COG3, NAPG, COPZ1, STX16, GOSR1, OPTN, GOLGA3	1435	19	13528	3.473171	1.000000e+00	2.494305e-01	1.878946e+01
no Peak	negative regulation of transferase activity	19	0.09756098	1.139014e-02	PRKCA, PTPRC, SNX6, HMGCR, NF1, DUSP22, ZNF675, PKIB, MBIP, PKIA, LATS1, CASP3, PSEN1, RGS3, HIPK3, ZFYVE28, MLLT1, CDK5RAP1, APC	1435	96	13528	1.865796	1.000000e+00	2.497042e-01	1.893257e+01
no Peak	cellular protein complex assembly	28	0.14377407	1.158399e-02	XPO1, NUP98, COX10, ANLN, NDUFS4, CSE1L, GSN, ZFYVE9, NDUFS8, FBXO5, PEX13, COX18, TNPO1, SCO1, SRP54, CENPF, TMEM70, SMAD2, IPO8, MBD2, TUBA8, TMEM48, TBCA, NUP205, NCK1, IPO5, TUBA4B, XPO7	1435	162	13528	1.629389	1.000000e+00	2.518362e-01	1.922332e+01
no Peak	RNA polyadenylation	6	0.03080873	1.172968e-02	ZC3H3, APP, GRSF1, PAPOLG, CSTF1, CPSF1	1435	14	13528	4.040219	1.000000e+00	2.530334e-01	1.944119e+01
no Peak	protein amino acid dephosphorylation	24	0.12323492	1.236763e-02	PTPRJ, PDP1, PTPRC, PTPN9, CDC14A, SSH2, PTPRA, PTPN4, PPM1A, PTPN22, DUSP22, DUSP11, PPM1B, PTEN, PTPN11, EYA3, MTMR3, PPM1D, PPP2CB, PPP3CB, MTMR6, DUSP7, PPP5C, PPP2R2A	1435	133	13528	1.701145	1.000000e+00	2.632811e-01	2.038867e+01
no Peak	cellular respiration	19	0.09756098	1.264139e-02	NDUFB3, NDUFB5, NDUFA8, COX10, SUCLG1, NDUFC1, NDUFA10, SDHA, NDUFV3, NDUFS4, UQCRH, NDUFS8, IDH2, CAT, SUCLA2, NFATC3, NDUFS1, UQCRB, MDH1	1435	97	13528	1.846561	1.000000e+00	2.666897e-01	2.079202e+01
no Peak	G1/S transition of mitotic cell cycle	13	0.06675225	1.294731e-02	CDC7, E2F6, CAMK2G, ACVR1B, CUL5, CAMK2D, HINFP, PPP3CB, NPAT, ADAM17, GFI1, ACVR1, NFATC1	1435	56	13528	2.188452	1.000000e+00	2.706130e-01	2.124047e+01
no Peak	positive regulation of nitrogen compound metabolic process	87	0.44672657	1.389970e-02	E2F3, RSF1, FOXK1, ELF4, TBX21, STAT5B, CASK, CTCF, ZEB1, FOXO3, MED21, SKAP1, ZBTB38, APP, MDFIC, MKL2, MYC, AKIRIN2, MYST4, SERTAD2, ATF7IP, TBL1XR1, SP100, BRF1, FOXJ2, MED13, ARID1B, TRERF1, GTF2H1, MED6, EYA3, NCOA2, HIF1A, MTF1, BPTF, MED17, HIPK2, PDGFRA, PIAS2, RNF20, TBX19, SMARCA4, ACVR1, SMARCAD1, BLM, PPM1A, NFYC, PRKDC, NFYB, TNFRSF1A, RGMB, BLOC1S2, MAP3K1, HINFP, POU2F1, TNKS, TCEA…	1435	644	13528	1.273547	1.000000e+00	2.858084e-01	2.262126e+01
no Peak	protein amino acid glycosylation	23	0.11810013	1.519841e-02	GALNT2, OSTC, GALNT1, ST6GAL1, LIPA, MAN1A2, FUT8, GALNT7, FUT11, ALG2, LOC402377, ST8SIA1, ALG5, PMM2, COG3, MAN2A1, STT3A, PSEN1, POMT1, ST8SIA4, RPN2, B3GNT2, SDF2	1435	128	13528	1.693946	1.000000e+00	3.063523e-01	2.446730e+01
no Peak	glycosylation	23	0.11810013	1.519841e-02	GALNT2, OSTC, GALNT1, ST6GAL1, LIPA, MAN1A2, FUT8, GALNT7, FUT11, ALG2, LOC402377, ST8SIA1, ALG5, PMM2, COG3, MAN2A1, STT3A, PSEN1, POMT1, ST8SIA4, RPN2, B3GNT2, SDF2	1435	128	13528	1.693946	1.000000e+00	3.063523e-01	2.446730e+01
no Peak	biopolymer glycosylation	23	0.11810013	1.519841e-02	GALNT2, OSTC, GALNT1, ST6GAL1, LIPA, MAN1A2, FUT8, GALNT7, FUT11, ALG2, LOC402377, ST8SIA1, ALG5, PMM2, COG3, MAN2A1, STT3A, PSEN1, POMT1, ST8SIA4, RPN2, B3GNT2, SDF2	1435	128	13528	1.693946	1.000000e+00	3.063523e-01	2.446730e+01
no Peak	double-strand break repair via nonhomologous end joining	5	0.02567394	1.562748e-02	XRCC5, POLA1, PRKDC, LIG4, NHEJ1	1435	10	13528	4.713589	1.000000e+00	3.117874e-01	2.506799e+01
no Peak	early endosome to late endosome transport	5	0.02567394	1.562748e-02	ANKRD27, FAM160A2, LYST, VPS4B, HOOK3	1435	10	13528	4.713589	1.000000e+00	3.117874e-01	2.506799e+01
no Peak	protein oligomerization	29	0.14890886	1.614459e-02	SMARCAD1, BLM, GRB2, LNX2, PDSS2, GCH1, IGHMBP2, TRIM4, TNFRSF1A, NOD2, NOD1, MAP3K1, ALOX5AP, CASP8, PEX14, FAS, CAT, PFKL, BRAF, VHL, DECR1, TRIM21, STOM, UQCRH, RRM2, RRM1, SPAST, PPP5C, SEPT9	1435	174	13528	1.571196	1.000000e+00	3.185495e-01	2.578594e+01
no Peak	endosome transport	13	0.06675225	1.698781e-02	FAM160A2, HTT, SNX1, VTI1A, HOOK3, ANKRD27, LYST, STX16, VPS4B, VPS35, VPS13A, GOSR1, VPS26A	1435	58	13528	2.112988	1.000000e+00	3.303795e-01	2.694271e+01
no Peak	spindle organization	11	0.05648267	1.743590e-02	HDAC3, KIF11, CEP120, PRC1, PCNT, FBXO5, TNKS, NDC80, HAUS8, CEP63, SMC1A	1435	45	13528	2.304421	1.000000e+00	3.356788e-01	2.755048e+01
no Peak	peptidyl-serine modification	10	0.05134788	1.856493e-02	PRKCA, GALNT2, GALNT1, SBK1, MAP3K1, GSK3B, NLK, HIPK3, PRKDC, TNKS	1435	39	13528	2.417225	1.000000e+00	3.513460e-01	2.906068e+01
no Peak	histone H4-K12 acetylation	4	0.02053915	1.858171e-02	ING4, PHF17, PHF15, MYST2	1435	6	13528	6.284785	1.000000e+00	3.497636e-01	2.908291e+01
no Peak	histone H4-K16 acetylation	4	0.02053915	1.858171e-02	ING4, PHF17, PHF15, MYST2	1435	6	13528	6.284785	1.000000e+00	3.497636e-01	2.908291e+01
no Peak	histone H4-K8 acetylation	4	0.02053915	1.858171e-02	ING4, PHF17, PHF15, MYST2	1435	6	13528	6.284785	1.000000e+00	3.497636e-01	2.908291e+01
no Peak	histone H4-K5 acetylation	4	0.02053915	1.858171e-02	ING4, PHF17, PHF15, MYST2	1435	6	13528	6.284785	1.000000e+00	3.497636e-01	2.908291e+01
no Peak	regulation of transcription of G1/S-phase of mitotic cell cycle	4	0.02053915	1.858171e-02	E2F6, NPAT, HINFP, GFI1	1435	6	13528	6.284785	1.000000e+00	3.497636e-01	2.908291e+01
no Peak	vesicle-mediated transport	78	0.40051348	1.870726e-02	CLTA, SEC24B, SEC31A, SEC24A, AP4E1, AP1G1, SORL1, CRCP, AP3S1, ITSN2, TSNARE1, RAB3IP, HOOK3, AP2B1, APP, GBF1, PACSIN2, GSN, ZFYVE9, VPS4B, ZFPL1, NECAP1, VPS13A, RAB6A, GOLGA4, GOLGA3, RAB27A, AP3B1, ARL1, STX2, NCALD, ATP6V1H, ARHGAP27, OPTN, VTI1A, BCAP31, ANKRD27, NPC1, UNC13D, GAPVD1, PSEN1, LYST, USO1, VAMP4, VPS26A, TRAPPC10, SPAST, TRAPPC3, TRAPPC2, RIN3, TG, PLDN, STX8, ARFGAP3, NAPG, …	1435	576	13528	1.276597	1.000000e+00	3.498427e-01	2.924894e+01
no Peak	T cell differentiation in the thymus	8	0.04107831	1.962756e-02	PTPRC, DOCK2, STAT5B, ADAM17, PRKDC, LIG4, FAS, APC	1435	27	13528	2.793238	1.000000e+00	3.617447e-01	3.045485e+01
no Peak	positive regulation of macromolecule biosynthetic process	87	0.44672657	1.975761e-02	E2F3, RSF1, FOXK1, ELF4, STAT5B, CASK, CTCF, ZEB1, FOXO3, MED21, SKAP1, ZBTB38, APP, FNTA, MDFIC, WIBG, MKL2, FAM129A, MYC, AKIRIN2, MYST4, SERTAD2, ATF7IP, TBL1XR1, SP100, BRF1, FOXJ2, MED13, ARID1B, TRERF1, GTF2H1, MED6, NCOA2, HIF1A, MTF1, BPTF, MED17, HIPK2, PDGFRA, PIAS2, RNF20, TBX19, SMARCA4, ACVR1, SMARCAD1, BLM, PPM1A, NFYC, PRKDC, NFYB, TNFRSF1A, RGMB, BLOC1S2, MAP3K1, HINFP, POU2F1, TN…	1435	654	13528	1.254074	1.000000e+00	3.618134e-01	3.062369e+01
no Peak	positive regulation of transcription, DNA-dependent	66	0.33889602	2.004357e-02	E2F3, FOXK1, ELF4, STAT5B, CASK, CTCF, FOXO3, ZEB1, MED21, SKAP1, ZBTB38, APP, MDFIC, MKL2, MYC, AKIRIN2, SERTAD2, ATF7IP, TBL1XR1, SP100, FOXJ2, MED13, ARID1B, TRERF1, GTF2H1, MED6, HIF1A, NCOA2, MTF1, BPTF, MED17, HIPK2, PIAS2, TBX19, SMARCA4, PPM1A, PRKDC, NFYC, NFYB, TNFRSF1A, MAP3K1, POU2F1, TCEA1, TAF9, AATF, RUNX1, NFATC2, NFATC3, RUNX2, TAF2, KLF12, TAF8, MAML2, CREBBP, SMAD2, AFF1, ATXN1…	1435	477	13528	1.304389	1.000000e+00	3.641475e-01	3.099357e+01
no Peak	ribonucleotide metabolic process	25	0.12836970	2.095177e-02	ADSS, RP2, ATP10A, ATP5G3, PPAT, CMPK1, GCH1, ATP2B4, VPS4B, RAB11A, NDUFS1, ATP5J, TCIRG1, CECR1, ATP5F1, ATP6V1H, NADK, GMPS, ATP7A, ATP6V1A, ATP9B, ATP2C1, ATP5C1, ATP5A1, DPYD	1435	147	13528	1.603262	1.000000e+00	3.753269e-01	3.215597e+01
no Peak	mRNA 3'-end processing	6	0.03080873	2.139779e-02	ZC3H3, APP, CLP1, GRSF1, CSTF1, CPSF1	1435	16	13528	3.535192	1.000000e+00	3.797479e-01	3.272003e+01
no Peak	nuclear export	13	0.06675225	2.190975e-02	ZC3H3, XPO1, NUP133, UPF2, SMG6, NUP160, NXF1, ATXN1, CCHCR1, GSK3B, GLE1, XPO7, THOC2	1435	60	13528	2.042555	1.000000e+00	3.849964e-01	3.336202e+01
no Peak	blastocyst growth	5	0.02567394	2.252974e-02	PRPF19, SBDS, TAF8, INTS1, SMARCA4	1435	11	13528	4.285081	1.000000e+00	3.916077e-01	3.413171e+01
no Peak	mitochondrion morphogenesis	5	0.02567394	2.252974e-02	MFN2, DNM1L, OPA1, COX10, COL4A3BP	1435	11	13528	4.285081	1.000000e+00	3.916077e-01	3.413171e+01
no Peak	mRNA polyadenylation	5	0.02567394	2.252974e-02	ZC3H3, APP, GRSF1, CSTF1, CPSF1	1435	11	13528	4.285081	1.000000e+00	3.916077e-01	3.413171e+01
no Peak	positive regulation of protein modification process	30	0.15404365	2.315137e-02	PML, ANAPC10, CDC16, PIN1, PSMF1, NOD2, FNTA, PSMB1, PSMD1, PSMB2, PSMD2, FBXO5, FBXO4, UBE2D1, FAM129A, ANAPC1, PRKCA, ANAPC2, CDC23, IL6R, CDC27, PSMB9, HDAC4, PSEN1, PSMD11, PSMD10, ADAM17, ANAPC7, TNK2, BMPR1A	1435	187	13528	1.512381	1.000000e+00	3.980948e-01	3.489500e+01
no Peak	negative regulation of protein metabolic process	30	0.15404365	2.315137e-02	GCLC, PML, ANAPC10, CDC16, PSMF1, PSMB1, TIA1, PSMB2, PSMD1, PSMD2, FBXO5, TAF9, UBE2D1, FAM129A, EIF2B3, BUB3, ANAPC1, PRKCA, ANAPC2, PTPRC, CDC23, CDC27, PSMB9, G6PD, PSEN1, PSMD11, PSMD10, MDM4, ANAPC7, EIF2C3	1435	187	13528	1.512381	1.000000e+00	3.980948e-01	3.489500e+01
no Peak	positive regulation of RNA metabolic process	66	0.33889602	2.354235e-02	E2F3, FOXK1, ELF4, STAT5B, CASK, CTCF, FOXO3, ZEB1, MED21, SKAP1, ZBTB38, APP, MDFIC, MKL2, MYC, AKIRIN2, SERTAD2, ATF7IP, TBL1XR1, SP100, FOXJ2, MED13, ARID1B, TRERF1, GTF2H1, MED6, HIF1A, NCOA2, MTF1, BPTF, MED17, HIPK2, PIAS2, TBX19, SMARCA4, PPM1A, PRKDC, NFYC, NFYB, TNFRSF1A, MAP3K1, POU2F1, TCEA1, TAF9, AATF, RUNX1, NFATC2, NFATC3, RUNX2, TAF2, KLF12, TAF8, MAML2, CREBBP, SMAD2, AFF1, ATXN1…	1435	481	13528	1.293542	1.000000e+00	4.014014e-01	3.537080e+01
no Peak	negative regulation of cellular protein metabolic process	29	0.14890886	2.440986e-02	GCLC, PML, ANAPC10, CDC16, PSMF1, PSMB1, TIA1, PSMB2, PSMD1, PSMD2, FBXO5, TAF9, UBE2D1, FAM129A, EIF2B3, BUB3, ANAPC1, PRKCA, ANAPC2, PTPRC, CDC23, CDC27, PSMB9, G6PD, PSEN1, PSMD11, PSMD10, ANAPC7, EIF2C3	1435	180	13528	1.518823	1.000000e+00	4.108433e-01	3.641475e+01
no Peak	cytokinesis	10	0.05134788	2.535152e-02	PRC1, ROCK1, STX2, ROCK2, NUSAP1, ANLN, RACGAP1, SPAST, DSTN, APC	1435	41	13528	2.299312	1.000000e+00	4.209726e-01	3.752990e+01
no Peak	negative regulation of protein complex disassembly	10	0.05134788	2.535152e-02	TRIOBP, ARHGEF2, SBDS, LIMA1, GSN, CAPZA2, SPTBN1, MAP4, RDX, APC	1435	41	13528	2.299312	1.000000e+00	4.209726e-01	3.752990e+01
no Peak	DNA damage checkpoint	11	0.05648267	2.676280e-02	BLM, MSH2, MAPK14, PML, BRE, HINFP, RPS27L, CEP63, FOXN3, UIMC1, PTPN11	1435	48	13528	2.160395	1.000000e+00	4.365979e-01	3.916662e+01
no Peak	microtubule-based process	38	0.19512195	2.679453e-02	CEP120, PRC1, HOOK3, TUBGCP3, C19ORF20, APP, CEP250, PEX1, BLOC1S2, CENPA, KATNA1, FBXO5, TNKS, PEX13, KIF3B, KIF11, OPA1, HTT, CKAP5, PCNT, KIF18A, KTN1, NUSAP1, KIF18B, NDC80, CEP63, BICD2, BBS2, HDAC3, TUBA8, KIF1B, RHOT1, KIF20B, TUBA4B, HAUS8, SMC1A, LRPPRC, SPAST	1435	253	13528	1.415940	1.000000e+00	4.350463e-01	3.920295e+01
no Peak	aerobic respiration	9	0.04621309	2.721207e-02	SDHA, COX10, UQCRH, SUCLG1, IDH2, CAT, SUCLA2, UQCRB, MDH1	1435	35	13528	2.424131	1.000000e+00	4.381840e-01	3.967909e+01
no Peak	methylation	15	0.07702182	2.741999e-02	ATF7IP, DNMT3A, EHMT1, CTCF, ATRX, PRMT2, WHSC1L1, MTR, FTSJD2, PCMT1, RAB6A, TGS1, RNF20, HEMK1, SUV420H1	1435	76	13528	1.860627	1.000000e+00	4.387619e-01	3.991488e+01
no Peak	biopolymer methylation	14	0.07188703	2.774603e-02	ATF7IP, DNMT3A, EHMT1, CTCF, ATRX, PRMT2, MTR, WHSC1L1, PCMT1, RAB6A, TGS1, RNF20, HEMK1, SUV420H1	1435	69	13528	1.912761	1.000000e+00	4.407379e-01	4.028286e+01
no Peak	double-strand break repair	13	0.06675225	2.781288e-02	XRCC5, BLM, MSH2, POLA1, PRKDC, UBE2V2, LIG4, UIMC1, EYA3, RPA1, TDP1, BRE, NHEJ1	1435	62	13528	1.976666	1.000000e+00	4.396257e-01	4.035805e+01
no Peak	peptidyl-serine phosphorylation	8	0.04107831	2.864025e-02	PRKCA, SBK1, MAP3K1, GSK3B, NLK, HIPK3, PRKDC, TNKS	1435	29	13528	2.600601	1.000000e+00	4.474232e-01	4.128122e+01
no Peak	inner cell mass cell proliferation	4	0.02053915	2.998246e-02	PRPF19, SBDS, TAF8, INTS1	1435	7	13528	5.386959	1.000000e+00	4.608688e-01	4.275015e+01
no Peak	regulation of viral transcription	4	0.02053915	2.998246e-02	SP100, RSF1, MDFIC, MAP3K1	1435	7	13528	5.386959	1.000000e+00	4.608688e-01	4.275015e+01
no Peak	regulation of microtubule-based process	11	0.05648267	3.054145e-02	XPO1, BBS2, ARHGEF2, SBDS, CEP120, CEP250, ROCK2, MKKS, SKA3, MAP4, APC	1435	49	13528	2.116305	1.000000e+00	4.652080e-01	4.335162e+01
no Peak	retrograde transport, endosome to Golgi	5	0.02567394	3.101631e-02	STX16, VPS35, GOSR1, VPS26A, VTI1A	1435	12	13528	3.927991	1.000000e+00	4.685416e-01	4.385785e+01
no Peak	mitochondrial ATP synthesis coupled electron transport	12	0.06161746	3.109092e-02	NDUFB3, NDUFV3, NDUFB5, NDUFS4, NDUFA8, COX10, UQCRH, NDUFS8, NDUFC1, NDUFA10, NDUFS1, UQCRB	1435	56	13528	2.020110	1.000000e+00	4.674480e-01	4.393700e+01
no Peak	ATP synthesis coupled electron transport	12	0.06161746	3.109092e-02	NDUFB3, NDUFV3, NDUFB5, NDUFS4, NDUFA8, COX10, UQCRH, NDUFS8, NDUFC1, NDUFA10, NDUFS1, UQCRB	1435	56	13528	2.020110	1.000000e+00	4.674480e-01	4.393700e+01
no Peak	ribosome biogenesis	21	0.10783055	3.168179e-02	RNASEN, NAF1, RNASEL, SDAD1, EXOSC7, NHP2L1, EXOSC2, UTP15, ERI1, RRP8, GNL3L, FBL, EXOSC10, SBDS, NOLC1, FRG1, WDR12, AATF, GNL2, DDX51, C1D	1435	122	13528	1.622711	1.000000e+00	4.719771e-01	4.456012e+01
no Peak	purine ribonucleotide metabolic process	23	0.11810013	3.335054e-02	TCIRG1, ADSS, RP2, ATP10A, CECR1, ATP5F1, ATP6V1H, NADK, GMPS, ATP5G3, PPAT, GCH1, ATP7A, ATP6V1A, ATP2B4, ATP2C1, ATP9B, VPS4B, ATP5C1, RAB11A, ATP5A1, NDUFS1, ATP5J	1435	138	13528	1.571196	1.000000e+00	4.878049e-01	4.628477e+01
no Peak	regulation of organelle organization	33	0.16944801	3.376554e-02	TRIOBP, XPO1, LIMA1, CAPZA2, PML, CTCF, RDX, ANAPC10, CDC16, ARPC5, LATS1, ZZEF1, DSTN, PIN1, SBDS, CEP250, GSN, MAP3K1, BUB1, SKA3, TNKS, MYC, APC, ARHGEF2, ROCK2, CENPF, CDC23, NUSAP1, ARPC1B, NCK1, KIF20B, MAP4, SPTBN1	1435	217	13528	1.433626	1.000000e+00	4.901989e-01	4.670572e+01
no Peak	immunoglobulin production	8	0.04107831	3.404994e-02	GALNT2, PTPRC, NOD2, MSH2, PRKDC, LIG4, FAS, CTNNBL1	1435	30	13528	2.513914	1.000000e+00	4.912170e-01	4.699240e+01
no Peak	nuclear-transcribed mRNA catabolic process, nonsense-mediated decay	8	0.04107831	3.404994e-02	EXOSC10, UPF2, PAN3, SMG6, DCP1B, WIBG, CASC3, KIAA0427	1435	30	13528	2.513914	1.000000e+00	4.912170e-01	4.699240e+01
no Peak	dephosphorylation	25	0.12836970	3.450110e-02	PDP1, CDC14A, SSH2, PPM1A, PTPN22, PPM1B, DUSP11, PTEN, MTMR3, PPP2CB, PPP3CB, MTMR6, PTPRJ, PTPRC, PTPN9, PTPN4, PTPRA, DUSP22, PTPN11, EYA3, MTMR12, PPM1D, DUSP7, PPP5C, PPP2R2A	1435	154	13528	1.530386	1.000000e+00	4.939211e-01	4.744419e+01
no Peak	respiratory electron transport chain	13	0.06675225	3.479124e-02	NDUFB3, NDUFB5, NDUFA8, COX10, NDUFC1, NDUFA10, NDUFV3, SDHA, NDUFS4, UQCRH, NDUFS8, NDUFS1, UQCRB	1435	64	13528	1.914895	1.000000e+00	4.949604e-01	4.773280e+01
no Peak	peptidyl-threonine phosphorylation	6	0.03080873	3.513780e-02	PRKCA, ACVR1B, SBK1, NLK, HIPK3, TNKS	1435	18	13528	3.142393	1.000000e+00	4.965524e-01	4.807558e+01
no Peak	cellular macromolecular complex subunit organization	50	0.25673941	3.522912e-02	XPO1, RSF1, HP1BP3, COX10, SNRPD1, CTCF, DSTN, NDUFS4, HIST1H2BK, GSN, SFRS8, ZFYVE9, CLP1, NDUFS8, COX18, TGS1, MYST4, CLNS1A, SRPK2, NUP133, MTERF, TMEM70, IPO8, MBD2, SMARCE1, TBCA, NCK1, NUP205, IPO5, TUBA4B, WASL, NUP98, ANLN, CSE1L, HJURP, CENPA, FBXO5, PEX13, TNPO1, SCO1, SRP54, KIF18A, CENPF, SMAD2, MTRF1L, ATXN2, TUBA8, TMEM48, SUPT16H, XPO7	1435	357	13528	1.320333	1.000000e+00	4.955829e-01	4.816555e+01
no Peak	glycoprotein metabolic process	31	0.15917843	3.577873e-02	GALNT2, OSTC, GALNT1, GALNT7, FUT8, ALG2, LOC402377, ST8SIA1, ALG5, EDEM3, DSE, HS2ST1, STT3A, POMT1, RPN2, B3GNT2, SDF2, ST6GAL1, LIPA, MAN1A2, FUT11, PMM2, COG3, ATP7A, NCSTN, MAN2A1, HIF1A, CHST7, PSEN1, ST8SIA4, EXT1	1435	202	13528	1.446745	1.000000e+00	4.991594e-01	4.870392e+01
no Peak	protein import into nucleus	16	0.08215661	3.578418e-02	XPO1, NUP98, HTT, PML, IPO8, CSE1L, TRPS1, ZFYVE9, NUP205, IPO5, PPP3CB, SPTBN1, KPNA5, KPNA3, XPO7, TNPO1	1435	86	13528	1.753894	1.000000e+00	4.973476e-01	4.870923e+01

## Sheet: HumanMCF7
Peak Group	Term	Count	%	PValue	Genes	List.Total	Pop.Hits	Pop.Total	Fold.Enrichment	Bonferroni	Benjamini	FDR
RNAP II total	translational elongation	13	0.3518268	5.074177e-08	EEF1A2, RPS9, EEF2, RPL37, RPL38, RPS5, RPS7, RPS19, HNRNPH2, RPS16, RPLP1, RPS15, RPS20	211	101	13528	8.252264	7.895108e-05	7.895108e-05	8.468302e-05
RNAP II total	regulation of cell cycle	17	0.4600812	6.007785e-05	CYP1A1, EDN1, PIM3, SFN, CCNG2, CDC37, CHMP1A, CDKN1A, PSMG2, ID2, JUN, RHOB, ID3, USP22, GADD45B, SIK1, SERTAD1	211	331	13528	3.292851	8.924736e-02	4.566639e-02	1.002168e-01
RNAP II total	positive regulation of myeloid leukocyte differentiation	5	0.1353180	1.455649e-04	ID2, KLF10, JUN, GNAS, ACIN1	211	18	13528	17.809373	2.026930e-01	7.272504e-02	2.426563e-01
RNAP II total	translation	16	0.4330176	2.081515e-04	EEF1A2, EIF5, RPS9, RPL37, EEF2, RPL38, RPS5, RPS7, HNRNPH2, RPS19, MRPL21, RPS16, MRPL27, RPLP1, RPS15, RPS20	211	331	13528	3.099154	2.766901e-01	7.778729e-02	3.468179e-01
RNAP II total	response to protein stimulus	9	0.2435724	2.580977e-04	EGR1, FOS, HERPUD1, ID2, KLF10, NFE2L2, ID3, HSPD1, SELS	211	107	13528	5.392745	3.307863e-01	7.718857e-02	4.298688e-01
RNAP II total	DNA packaging	9	0.2435724	4.732208e-04	CHMP1A, HIST1H2BD, HIST1H1D, HIST1H1C, HIST2H2BE, HIST1H4E, HIST1H4C, MCM2, ACIN1, HIST1H4D, NAP1L4, HIST1H4H	211	117	13528	4.931826	5.212161e-01	1.155161e-01	7.868343e-01
RNAP II total	ribosomal small subunit biogenesis	4	0.1082544	5.550065e-04	RPS19, RPS16, RPS15, RPS7	211	11	13528	23.314089	5.784555e-01	1.160938e-01	9.222299e-01
RNAP II total	chromatin assembly or disassembly	9	0.2435724	8.153131e-04	HIST1H2BD, HIST1H1D, HIST1H1C, HIST2H2BE, CHD2, CBX4, HIST1H4E, HIST1H4C, MCM2, HIST1H4D, NAP1L4, HIST1H4H	211	127	13528	4.543494	7.189281e-01	1.466991e-01	1.352010e+00
RNAP II total	response to organic substance	24	0.6495264	8.282500e-04	EGR1, HERPUD1, CYP1A1, MCL1, SOCS3, KLF10, RXRA, TAT, SELS, SRC, TRIB1, FOS, CDKN1A, EP300, ID2, TFRC, GATA3, JUN, GNAS, ID3, HSPD1, NFE2L2, PPP5C, AKT2	211	721	13528	2.134161	7.245340e-01	1.334665e-01	1.373324e+00
RNAP II total	positive regulation of cellular biosynthetic process	23	0.6224628	9.866512e-04	EGR1, NIF3L1, RXRA, EDN1, FOXA1, ARPP19, NR4A1, ILF3, DDX5, NRIP1, FOS, ATF4, EP300, JUN, DYRK1B, SERTAD3, USP22, PHF5A, NFE2L2, KLF2, MAPRE3, SERTAD1, AKT2	211	685	13528	2.152724	7.847569e-01	1.423839e-01	1.633941e+00
RNAP II total	positive regulation of biosynthetic process	23	0.6224628	1.189619e-03	EGR1, NIF3L1, RXRA, EDN1, FOXA1, ARPP19, NR4A1, ILF3, DDX5, NRIP1, FOS, ATF4, EP300, JUN, DYRK1B, SERTAD3, USP22, PHF5A, NFE2L2, KLF2, MAPRE3, SERTAD1, AKT2	211	695	13528	2.121750	8.431003e-01	1.549649e-01	1.966938e+00
RNAP II total	positive regulation of transcription	20	0.5412720	1.267411e-03	EGR1, NIF3L1, RXRA, FOXA1, NR4A1, ILF3, DDX5, NRIP1, FOS, ATF4, EP300, JUN, DYRK1B, SERTAD3, USP22, PHF5A, NFE2L2, KLF2, MAPRE3, SERTAD1	211	564	13528	2.273537	8.610086e-01	1.516358e-01	2.094286e+00
RNAP II total	chromosome organization	18	0.4871448	1.502576e-03	AEBP2, CCDC99, HIST1H1D, HIST1H2BD, HMGN2, HIST1H1C, RING1, CBX4, HMG20B, MCM2, NAP1L4, CHMP1A, EP300, HIST2H2BE, CHD2, HIST1H4E, HIST1H4C, ACIN1, HIST1H4D, USP22, HIST1H4H	211	485	13528	2.379479	9.036499e-01	1.647148e-01	2.478311e+00
RNAP II total	positive regulation of myeloid cell differentiation	5	0.1353180	1.622523e-03	ID2, KLF10, JUN, GNAS, ACIN1	211	33	13528	9.714204	9.200773e-01	1.651292e-01	2.673639e+00
RNAP II total	positive regulation of gene expression	20	0.5412720	1.782792e-03	EGR1, NIF3L1, RXRA, FOXA1, NR4A1, ILF3, DDX5, NRIP1, FOS, ATF4, EP300, JUN, DYRK1B, SERTAD3, USP22, PHF5A, NFE2L2, KLF2, MAPRE3, SERTAD1	211	581	13528	2.207014	9.377439e-01	1.689788e-01	2.934056e+00
RNAP II total	regulation of transcription	59	1.5967524	1.842409e-03	HMGN2, NIF3L1, ELF3, CBX4, PNN, FOS, GATA3, SERTAD3, MYB, SIK1, DEDD2, SERTAD1, EGR1, EGR3, RXRA, ZNF48, RING1, HMG20B, MCM2, IRF2BP1, NRIP1, ZNF341, CHMP1A, EP300, HES4, JUN, TGIF1, TFAP2A, USP22, NFE2L2, MAPRE3, IRX5, TRIB3, CCDC59, POLR2A, TRIB1, TSC22D1, ZNF703, ATN1, JUND, CHD2, EWSR1, ENO1, AEBP2, ERF, KLF10, FOXA1, NR4A1, ILF3, DDX5, ATF4, ZNF217, ID2, SP2, DYRK1B, PHF5A, ID3, KLF2, KLF3	211	2601	13528	1.454329	9.432689e-01	1.641780e-01	3.030760e+00
RNAP II total	regulation of cell death	25	0.6765900	1.896192e-03	MCL1, CLU, CBX4, SFN, SRC, MOAP1, BAG3, TRAF4, DEDD2, HERPUD1, SLC25A4, SOCS3, KLF10, RXRA, EEF1A2, NR4A1, PIM3, SELS, NRAS, CDKN1A, KRT18, PSMG2, JUN, HSPD1, ID3	211	815	13528	1.966679	9.478314e-01	1.594695e-01	3.117921e+00
RNAP II total	nucleosome assembly	7	0.1894452	1.937028e-03	HIST1H2BD, HIST1H1D, HIST1H1C, HIST2H2BE, HIST1H4E, HIST1H4C, MCM2, HIST1H4D, NAP1L4, HIST1H4H	211	84	13528	5.342812	9.510492e-01	1.543145e-01	3.184052e+00
RNAP II total	chromatin assembly	7	0.1894452	2.315984e-03	HIST1H2BD, HIST1H1D, HIST1H1C, HIST2H2BE, HIST1H4E, HIST1H4C, MCM2, HIST1H4D, NAP1L4, HIST1H4H	211	87	13528	5.158577	9.728899e-01	1.729473e-01	3.795719e+00
RNAP II total	chromatin organization	15	0.4059540	2.349026e-03	AEBP2, HIST1H1D, HIST1H2BD, HMGN2, HIST1H1C, RING1, CBX4, HMG20B, MCM2, NAP1L4, EP300, HIST2H2BE, HIST1H4E, CHD2, HIST1H4C, HIST1H4D, USP22, HIST1H4H	211	378	13528	2.544196	9.742516e-01	1.672062e-01	3.848880e+00
RNAP II total	positive regulation of nitrogen compound metabolic process	21	0.5683356	2.482077e-03	EGR1, NIF3L1, RXRA, EDN1, FOXA1, NR4A1, ILF3, DDX5, NRIP1, FOS, ATF4, EP300, JUN, DYRK1B, SERTAD3, USP22, PHF5A, NFE2L2, KLF2, MAPRE3, SERTAD1	211	644	13528	2.090666	9.790771e-01	1.681796e-01	4.062661e+00
RNAP II total	response to organic cyclic substance	8	0.2165088	2.789500e-03	FOS, CDKN1A, CYP1A1, SOCS3, JUN, RXRA, TAT, PPP5C	211	121	13528	4.238925	9.870483e-01	1.792768e-01	4.554910e+00
RNAP II total	protein-DNA complex assembly	7	0.1894452	2.904985e-03	HIST1H2BD, HIST1H1D, HIST1H1C, HIST2H2BE, HIST1H4E, HIST1H4C, MCM2, HIST1H4D, NAP1L4, HIST1H4H	211	91	13528	4.931826	9.891841e-01	1.786571e-01	4.739212e+00
RNAP II total	positive regulation of macromolecule biosynthetic process	21	0.5683356	2.960288e-03	EGR1, NIF3L1, RXRA, FOXA1, NR4A1, ILF3, DDX5, NRIP1, FOS, ATF4, EP300, JUN, DYRK1B, SERTAD3, USP22, PHF5A, NFE2L2, KLF2, MAPRE3, SERTAD1, AKT2	211	654	13528	2.058698	9.900784e-01	1.748664e-01	4.827350e+00
RNAP II total	negative regulation of transcription from RNA polymerase II promoter	12	0.3247632	2.965512e-03	EGR1, ID2, ATN1, KLF10, RXRA, FOXA1, CBX4, TGIF1, ID3, SIK1, ENO1, NRIP1	211	266	13528	2.892349	9.901589e-01	1.687691e-01	4.835673e+00
RNAP II total	positive regulation of cell differentiation	11	0.2976996	3.094191e-03	ID2, PDLIM7, SOCS3, KLF10, JUN, FOXA1, CLU, JUND, TGIF1, GNAS, ACIN1	211	229	13528	3.079699	9.919495e-01	1.692800e-01	5.040441e+00
RNAP II total	programmed cell death	20	0.5412720	3.126959e-03	MCL1, CLU, TRIB3, SFN, DNAJB13, CLPTM1L, NRAS, MOAP1, KRT18, EP300, JUN, BAG3, PKM2, KRT8, RHOB, ACIN1, HSPD1, GADD45B, TRAF4, DEDD2	211	611	13528	2.098650	9.923509e-01	1.651372e-01	5.092519e+00
RNAP II total	nucleosome organization	7	0.1894452	3.238377e-03	HIST1H2BD, HIST1H1D, HIST1H1C, HIST2H2BE, HIST1H4E, HIST1H4C, MCM2, HIST1H4D, NAP1L4, HIST1H4H	211	93	13528	4.825766	9.935720e-01	1.649413e-01	5.269394e+00
RNAP II total	regulation of apoptosis	24	0.6495264	3.385157e-03	HERPUD1, MCL1, SOCS3, KLF10, EEF1A2, RXRA, CLU, CBX4, NR4A1, PIM3, SFN, SELS, SRC, NRAS, MOAP1, CDKN1A, PSMG2, KRT18, JUN, BAG3, ID3, HSPD1, TRAF4, DEDD2	211	804	13528	1.913843	9.948884e-01	1.663481e-01	5.501932e+00
RNAP II total	regulation of myeloid leukocyte differentiation	5	0.1353180	3.645881e-03	ID2, KLF10, JUN, GNAS, ACIN1	211	41	13528	7.818749	9.965979e-01	1.725820e-01	5.913666e+00
RNAP II total	negative regulation of transcription, DNA-dependent	14	0.3788904	3.768425e-03	EGR1, RXRA, KLF10, FOXA1, CBX4, ILF3, NRIP1, CHMP1A, ID2, ATN1, TGIF1, ID3, SIK1, ENO1	211	356	13528	2.521327	9.971905e-01	1.726338e-01	6.106603e+00
RNAP II total	rRNA metabolic process	7	0.1894452	3.790902e-03	EIF4A3, DDX56, RPS19, RPS16, RPS15, DEDD2, RPS7	211	96	13528	4.674961	9.972874e-01	1.686321e-01	6.141952e+00
RNAP II total	regulation of programmed cell death	24	0.6495264	3.822286e-03	HERPUD1, MCL1, SOCS3, KLF10, EEF1A2, RXRA, CLU, CBX4, NR4A1, PIM3, SFN, SELS, SRC, NRAS, MOAP1, CDKN1A, PSMG2, KRT18, JUN, BAG3, ID3, HSPD1, TRAF4, DEDD2	211	812	13528	1.894988	9.974172e-01	1.652074e-01	6.191287e+00
RNAP II total	cellular macromolecular complex subunit organization	14	0.3788904	3.858467e-03	HIST1H1D, HIST1H2BD, HIST1H1C, MCM2, NAP1L4, SRC, DSTN, PSMG2, HIST2H2BE, RPS15, HIST1H4E, TUBD1, HIST1H4C, HIST1H4D, HSPD1, PILRB, HIST1H4H	211	357	13528	2.514264	9.975591e-01	1.621558e-01	6.248131e+00
RNAP II total	positive regulation of nucleobase, nucleoside, nucleotide and nucleic acid metabolic process	20	0.5412720	3.930073e-03	EGR1, NIF3L1, RXRA, FOXA1, NR4A1, ILF3, DDX5, NRIP1, FOS, ATF4, EP300, JUN, DYRK1B, SERTAD3, USP22, PHF5A, NFE2L2, KLF2, MAPRE3, SERTAD1	211	624	13528	2.054928	9.978174e-01	1.605968e-01	6.360539e+00
RNAP II total	cell death	22	0.5953992	3.999012e-03	MCL1, CLU, TRIB3, SFN, DNAJB13, CLPTM1L, NRAS, MOAP1, KRT18, EP300, ATN1, HSPB8, JUN, BAG3, PKM2, KRT8, RHOB, ACIN1, HSPD1, GADD45B, TRAF4, DEDD2	211	719	13528	1.961756	9.980403e-01	1.590245e-01	6.468640e+00
RNAP II total	cellular macromolecular complex assembly	13	0.3518268	4.063227e-03	HIST1H1D, HIST1H2BD, HIST1H1C, MCM2, NAP1L4, SRC, PSMG2, HIST2H2BE, RPS15, HIST1H4E, TUBD1, HIST1H4C, HIST1H4D, HSPD1, PILRB, HIST1H4H	211	318	13528	2.621002	9.982273e-01	1.573666e-01	6.569228e+00
RNAP II total	positive regulation of developmental process	12	0.3247632	4.146446e-03	ID2, PDLIM7, SOCS3, KLF10, JUN, FOXA1, CLU, JUND, TGIF1, RHOB, GNAS, ACIN1	211	278	13528	2.767500	9.984434e-01	1.564525e-01	6.699432e+00
RNAP II total	death	22	0.5953992	4.328888e-03	MCL1, CLU, TRIB3, SFN, DNAJB13, CLPTM1L, NRAS, MOAP1, KRT18, EP300, ATN1, HSPB8, JUN, BAG3, PKM2, KRT8, RHOB, ACIN1, HSPD1, GADD45B, TRAF4, DEDD2	211	724	13528	1.948208	9.988296e-01	1.589351e-01	6.984285e+00
RNAP II total	negative regulation of RNA metabolic process	14	0.3788904	4.332520e-03	EGR1, RXRA, KLF10, FOXA1, CBX4, ILF3, NRIP1, CHMP1A, ID2, ATN1, TGIF1, ID3, SIK1, ENO1	211	362	13528	2.479537	9.988362e-01	1.554076e-01	6.989948e+00
RNAP II total	regulation of transcription from RNA polymerase II promoter	22	0.5953992	4.537494e-03	EGR1, ERF, KLF10, RXRA, FOXA1, CBX4, NR4A1, NRIP1, FOS, ATF4, EP300, ATN1, ID2, SP2, JUN, JUND, CHD2, TGIF1, TFAP2A, ID3, SIK1, ENO1	211	727	13528	1.940168	9.991552e-01	1.585219e-01	7.308987e+00
RNAP II total	regulation of myeloid cell differentiation	6	0.1623816	4.593946e-03	ID2, KLF10, JUN, HIST1H4E, GNAS, HIST1H4C, ACIN1, HIST1H4D, HIST1H4H	211	70	13528	5.495464	9.992265e-01	1.568302e-01	7.396672e+00
RNAP II total	response to inorganic substance	10	0.2706360	4.707403e-03	FOS, CDKN1A, EP300, CYP1A1, TFRC, UCP2, JUN, EEF1A2, RXRA, TAT	211	205	13528	3.127500	9.993523e-01	1.569631e-01	7.572667e+00
RNAP II total	RNA processing	18	0.4871448	5.138536e-03	ZC3H3, DDX5, HNRNPA1, TRMT61A, PNN, POLR2A, RPS7, EIF4A3, PCF11, DDX17, DDX56, HNRNPH2, RPS19, RPS16, RPS15, U2AF1, PHF5A, DEDD2	211	547	13528	2.109776	9.996699e-01	1.665535e-01	8.238580e+00
RNAP II total	transcription	48	1.2990528	5.268819e-03	ELF3, CBX4, TRIB3, PTMA, CCDC59, POLR2A, PNN, TSC22D1, ZNF703, GATA3, JUND, SERTAD3, MYB, EWSR1, DEDD2, SERTAD1, ENO1, EGR1, AEBP2, ERF, EGR3, RXRA, KLF10, FOXA1, ZNF48, RING1, NR4A1, ILF3, HMG20B, MCM2, IRF2BP1, NRIP1, ZNF341, CHMP1A, ATF4, ZNF217, EP300, SP2, HES4, JUN, TGIF1, TFAP2A, PHF5A, USP22, NFE2L2, KLF2, KLF3, PPP5C	211	2101	13528	1.464760	9.997308e-01	1.669534e-01	8.438921e+00
RNAP II total	apoptosis	19	0.5142084	5.969923e-03	MCL1, CLU, TRIB3, SFN, DNAJB13, CLPTM1L, NRAS, MOAP1, KRT18, EP300, JUN, BAG3, KRT8, RHOB, ACIN1, HSPD1, GADD45B, TRAF4, DEDD2	211	602	13528	2.023523	9.999101e-01	1.833497e-01	9.509993e+00
RNAP II total	response to extracellular stimulus	10	0.2706360	7.462946e-03	FOS, CDKN1A, CHMP1A, RPS19, CYP1A1, TFRC, STC2, SOCS3, JUN, RXRA	211	220	13528	2.914261	9.999913e-01	2.196383e-01	1.175175e+01
RNAP II total	regulation of RNA metabolic process	42	1.1366712	7.860902e-03	HMGN2, IRX5, NIF3L1, ELF3, CBX4, POLR2A, ZFP36L1, TSC22D1, FOS, ZFP36L2, ATN1, GATA3, JUND, CHD2, SIK1, MYB, EWSR1, ENO1, EGR1, AEBP2, ERF, RXRA, KLF10, FOXA1, NR4A1, ILF3, HMG20B, NRIP1, CHMP1A, ATF4, EP300, ID2, SP2, HES4, JUN, DYRK1B, TGIF1, TFAP2A, ID3, PHF5A, NFE2L2, MAPRE3	211	1813	13528	1.485260	9.999954e-01	2.257273e-01	1.234041e+01
RNAP II total	nucleus organization	5	0.1353180	8.540381e-03	MOAP1, LMNA, ACIN1, EMD, DEDD2	211	52	13528	6.164783	9.999984e-01	2.384240e-01	1.333696e+01
RNAP II total	regulation of cellular component size	11	0.2976996	9.884702e-03	CDKN1A, EP300, EDN1, SERTAD3, SLC3A2, SFN, DDX5, SERTAD1, SPTAN1, DSTN, ENO1	211	271	13528	2.602403	9.999998e-01	2.659237e-01	1.527731e+01
RNAP II total	response to corticosteroid stimulus	6	0.1623816	1.033754e-02	FOS, CDKN1A, EP300, RXRA, TAT, SRC	211	85	13528	4.525676	9.999999e-01	2.716968e-01	1.592167e+01
RNAP II total	negative regulation of cell death	13	0.3518268	1.061213e-02	MCL1, SLC25A4, SOCS3, EEF1A2, CLU, CBX4, PIM3, SELS, NRAS, CDKN1A, KRT18, BAG3, HSPD1	211	360	13528	2.315219	9.999999e-01	2.733022e-01	1.631015e+01
RNAP II total	negative regulation of macromolecule biosynthetic process	17	0.4600812	1.135324e-02	EGR1, KLF10, RXRA, FOXA1, EDN1, CBX4, ILF3, NRIP1, EIF4A3, CHMP1A, ID2, ATN1, TGIF1, ID3, SIK1, DEDD2, ENO1	211	547	13528	1.992566	1.000000e+00	2.848197e-01	1.735024e+01
RNAP II total	negative regulation of protein kinase activity	6	0.1623816	1.136066e-02	CDKN1A, SPRED2, TRIB3, SFN, GADD45B, TRIB1	211	87	13528	4.421638	1.000000e+00	2.805217e-01	1.736059e+01
RNAP II total	negative regulation of transcription	15	0.4059540	1.250209e-02	EGR1, RXRA, KLF10, FOXA1, CBX4, ILF3, NRIP1, CHMP1A, ID2, ATN1, TGIF1, ID3, SIK1, DEDD2, ENO1	211	459	13528	2.095220	1.000000e+00	2.994748e-01	1.893856e+01
RNAP II total	mRNA metabolic process	13	0.3518268	1.290274e-02	ZC3H3, PAN3, DDX5, HNRNPA1, PNN, POLR2A, ZFP36L1, PCF11, ZFP36L2, EIF4A3, HNRNPH2, U2AF1, PHF5A	211	370	13528	2.252645	1.000000e+00	3.029128e-01	1.948570e+01
RNAP II total	negative regulation of kinase activity	6	0.1623816	1.302147e-02	CDKN1A, SPRED2, TRIB3, SFN, GADD45B, TRIB1	211	90	13528	4.274250	1.000000e+00	3.007856e-01	1.964717e+01
RNAP II total	negative regulation of nucleobase, nucleoside, nucleotide and nucleic acid metabolic process	16	0.4330176	1.385107e-02	EGR1, KLF10, RXRA, FOXA1, EDN1, CBX4, ILF3, NRIP1, CHMP1A, ID2, ATN1, TGIF1, ID3, SIK1, DEDD2, ENO1	211	512	13528	2.003555	1.000000e+00	3.121526e-01	2.076695e+01
RNAP II total	negative regulation of cellular biosynthetic process	17	0.4600812	1.415228e-02	EGR1, KLF10, RXRA, FOXA1, EDN1, CBX4, ILF3, NRIP1, EIF4A3, CHMP1A, ID2, ATN1, TGIF1, ID3, SIK1, DEDD2, ENO1	211	561	13528	1.942841	1.000000e+00	3.133309e-01	2.116988e+01
RNAP II total	rRNA processing	6	0.1623816	1.421546e-02	EIF4A3, DDX56, RPS19, RPS16, RPS15, RPS7	211	92	13528	4.181331	1.000000e+00	3.101628e-01	2.125414e+01
RNAP II total	regulation of transcription, DNA-dependent	40	1.0825440	1.472001e-02	HMGN2, IRX5, NIF3L1, ELF3, CBX4, POLR2A, TSC22D1, FOS, ATN1, GATA3, JUND, CHD2, SIK1, MYB, EWSR1, ENO1, EGR1, ERF, AEBP2, RXRA, KLF10, FOXA1, NR4A1, ILF3, HMG20B, NRIP1, CHMP1A, ATF4, EP300, ID2, SP2, HES4, JUN, DYRK1B, TGIF1, TFAP2A, ID3, PHF5A, NFE2L2, MAPRE3	211	1773	13528	1.446447	1.000000e+00	3.149558e-01	2.192409e+01
RNAP II total	regulation of cell size	9	0.2435724	1.507648e-02	CDKN1A, EP300, EDN1, SERTAD3, SLC3A2, SFN, DDX5, SERTAD1, ENO1	211	206	13528	2.801086	1.000000e+00	3.169945e-01	2.239418e+01
RNAP II total	response to endoplasmic reticulum stress	4	0.1082544	1.549208e-02	HERPUD1, ATF4, NFE2L2, SELS	211	34	13528	7.542793	1.000000e+00	3.199742e-01	2.293888e+01
RNAP II total	negative regulation of nitrogen compound metabolic process	16	0.4330176	1.549320e-02	EGR1, KLF10, RXRA, FOXA1, EDN1, CBX4, ILF3, NRIP1, CHMP1A, ID2, ATN1, TGIF1, ID3, SIK1, DEDD2, ENO1	211	519	13528	1.976532	1.000000e+00	3.158834e-01	2.294034e+01
RNAP II total	nuclear-transcribed mRNA catabolic process	4	0.1082544	1.675447e-02	ZFP36L1, EIF4A3, ZFP36L2, PAN3	211	35	13528	7.327285	1.000000e+00	3.326724e-01	2.457147e+01
RNAP II total	negative regulation of transferase activity	6	0.1623816	1.681960e-02	CDKN1A, SPRED2, TRIB3, SFN, GADD45B, TRIB1	211	96	13528	4.007109	1.000000e+00	3.296179e-01	2.465481e+01
RNAP II total	positive regulation of transcription, DNA-dependent	15	0.4059540	1.688833e-02	EGR1, NIF3L1, RXRA, FOXA1, NR4A1, ILF3, NRIP1, FOS, ATF4, EP300, JUN, DYRK1B, PHF5A, NFE2L2, MAPRE3	211	477	13528	2.016155	1.000000e+00	3.266987e-01	2.474267e+01
RNAP II total	negative regulation of biosynthetic process	17	0.4600812	1.695764e-02	EGR1, KLF10, RXRA, FOXA1, EDN1, CBX4, ILF3, NRIP1, EIF4A3, CHMP1A, ID2, ATN1, TGIF1, ID3, SIK1, DEDD2, ENO1	211	573	13528	1.902153	1.000000e+00	3.238622e-01	2.483116e+01
RNAP II total	positive regulation of RNA metabolic process	15	0.4059540	1.822860e-02	EGR1, NIF3L1, RXRA, FOXA1, NR4A1, ILF3, NRIP1, FOS, ATF4, EP300, JUN, DYRK1B, PHF5A, NFE2L2, MAPRE3	211	481	13528	1.999389	1.000000e+00	3.395678e-01	2.643673e+01
RNAP II total	RNA catabolic process	5	0.1353180	1.828941e-02	ZFP36L1, EIF4A3, ZFP36L2, PAN3, DEDD2	211	65	13528	4.931826	1.000000e+00	3.365562e-01	2.651274e+01
RNAP II total	negative regulation of macromolecule metabolic process	20	0.5412720	2.002218e-02	EGR1, KLF10, RXRA, FOXA1, EDN1, CBX4, ILF3, NRIP1, EIF4A3, CHMP1A, G6PD, ATN1, ID2, JUN, TGIF1, ID3, SIK1, PSMD7, DEDD2, ENO1	211	734	13528	1.746969	1.000000e+00	3.580522e-01	2.864774e+01
RNAP II total	negative regulation of apoptosis	12	0.3247632	2.252310e-02	NRAS, CDKN1A, KRT18, MCL1, SOCS3, BAG3, EEF1A2, CLU, CBX4, PIM3, HSPD1, SELS	211	354	13528	2.173347	1.000000e+00	3.887899e-01	3.162659e+01
RNAP II total	negative regulation of programmed cell death	12	0.3247632	2.416264e-02	NRAS, CDKN1A, KRT18, MCL1, SOCS3, BAG3, EEF1A2, CLU, CBX4, PIM3, HSPD1, SELS	211	359	13528	2.143078	1.000000e+00	4.062831e-01	3.351558e+01
RNAP II total	positive regulation of macromolecule metabolic process	22	0.5953992	2.546678e-02	EGR1, NIF3L1, RXRA, FOXA1, NR4A1, ILF3, DDX5, NRIP1, FOS, ATF4, EP300, JUN, DYRK1B, SERTAD3, USP22, PHF5A, NFE2L2, KLF2, MAPRE3, PSMD7, SERTAD1, AKT2	211	857	13528	1.645860	1.000000e+00	4.186645e-01	3.498299e+01
RNAP II total	negative regulation of gene expression	15	0.4059540	2.562270e-02	EGR1, RXRA, KLF10, FOXA1, CBX4, ILF3, NRIP1, CHMP1A, ID2, ATN1, TGIF1, ID3, SIK1, DEDD2, ENO1	211	504	13528	1.908147	1.000000e+00	4.163854e-01	3.515637e+01
RNAP II total	aging	6	0.1623816	2.836365e-02	NRAS, FOS, TFRC, SOCS3, JUN, RXRA	211	110	13528	3.497113	1.000000e+00	4.451753e-01	3.813431e+01
RNAP II total	mRNA catabolic process	4	0.1082544	2.887611e-02	ZFP36L1, EIF4A3, ZFP36L2, PAN3	211	43	13528	5.964069	1.000000e+00	4.468429e-01	3.867661e+01
RNAP II total	erythrocyte differentiation	4	0.1082544	2.887611e-02	G6PD, RPS19, ID2, ACIN1	211	43	13528	5.964069	1.000000e+00	4.468429e-01	3.867661e+01
RNAP II total	regulation of osteoblast differentiation	4	0.1082544	2.887611e-02	PDLIM7, JUND, GNAS, TOB1	211	43	13528	5.964069	1.000000e+00	4.468429e-01	3.867661e+01
RNAP II total	response to steroid hormone stimulus	8	0.2165088	3.010322e-02	FOS, CDKN1A, EP300, SOCS3, GATA3, RXRA, TAT, SRC	211	192	13528	2.671406	1.000000e+00	4.565106e-01	3.995707e+01
RNAP II total	negative regulation of caspase activity	3	0.0811908	3.116690e-02	HERPUD1, NR4A1, SFN	211	18	13528	10.685624	1.000000e+00	4.640097e-01	4.104662e+01
RNAP II total	regulation of mitotic cell cycle	7	0.1894452	3.126634e-02	CHMP1A, PSMG2, CYP1A1, EDN1, PIM3, USP22, SIK1	211	152	13528	2.952607	1.000000e+00	4.608925e-01	4.114752e+01
RNAP II total	response to lipopolysaccharide	5	0.1353180	3.171241e-02	FOS, CYP1A1, SOCS3, JUN, TRIB1	211	77	13528	4.163230	1.000000e+00	4.615497e-01	4.159816e+01
RNAP II total	response to glucocorticoid stimulus	5	0.1353180	3.303440e-02	FOS, CDKN1A, EP300, RXRA, TAT	211	78	13528	4.109855	1.000000e+00	4.713536e-01	4.291471e+01
RNAP II total	regulation of caspase activity	5	0.1353180	3.438822e-02	HERPUD1, MOAP1, NR4A1, SFN, HSPD1	211	79	13528	4.057832	1.000000e+00	4.810881e-01	4.423400e+01
RNAP II total	response to cytokine stimulus	5	0.1353180	3.438822e-02	FOS, MCL1, SOCS3, JUN, SRC	211	79	13528	4.057832	1.000000e+00	4.810881e-01	4.423400e+01
RNAP II total	negative regulation of molecular function	11	0.2976996	3.564010e-02	HERPUD1, CDKN1A, ID2, SPRED2, NR4A1, TRIB3, ID3, SFN, GADD45B, PSMD7, TRIB1	211	334	13528	2.111530	1.000000e+00	4.894375e-01	4.542839e+01
no Peak	regulation of transcription	596	1.783736869	4.489979e-14	ZNF57, XRCC6, ASCC1, ZNF639, MED22, MED21, ZNF253, MXI1, ZNF254, CITED4, ZNF251, CTNNB1, EPC1, APP, TAF5L, ZNF777, EPC2, CDCA7, ZNF248, PHTF2, TIGD2, PHTF1, ZNF107, TIGD3, ZNF394, MTERFD3, CCAR1, ZNF43, PTPRK, ZNF644, PCBD1, RREB1, TAF4B, RCOR1, ZNF507, ZHX2, ZNF791, HMG20A, ZNF503, MED13, MED10, MED19, ZNF787, MAPK1, ZNF236, MSX1, ZNF784, MED15, PTRF, MED16, ASCC3, MED17, ZNF786, ZNF785, ZZZ3, T…	2397	2601	13528	1.293217	1.972635e-10	1.972635e-10	8.421042e-11
no Peak	mitotic cell cycle	125	0.374105887	8.458833e-14	PRC1, BTRC, DBF4, PTTG1, CD2AP, CUL3, CUL5, APP, NUP37, ASPM, CUL1, ANAPC1, ANAPC2, ZC3HC1, SGOL1, PIM1, SKP1, FOXN3, NCAPD2, DCLRE1A, TIMELESS, PSMA4, CLIP1, STMN1, ANAPC7, NEK4, SEPT7, UBA52, CCDC99, BLM, NEK2, NEK1, TIPIN, NEDD9, ANAPC10, ITGB1, SPC24, SPC25, PSMB6, PSMB1, NCAPG2, KATNA1, PSMB2, FBXO5, SKA3, SKA1, UBE2D1, TCF3, TAF2, YEATS4, CKAP5, NDC80, TPD52L1, PMF1, CDC27, PSMB9, RNF8, PSM…	2397	370	13528	1.906663	3.720664e-10	1.860332e-10	1.588174e-10
no Peak	cell cycle process	171	0.511776853	1.342781e-13	RAD51C, XRCC2, PRC1, DBF4, BTRC, PTTG1, CD2AP, SART1, CTNNB1, CUL3, CUL5, MLL5, APP, RSPH1, NUP37, TUBG1, ASPM, CUL1, ANAPC1, ANAPC2, ZC3HC1, SGOL1, PIM1, MND1, SKP1, MYH9, FOXN3, TACC2, NCAPD2, RAD1, DCLRE1A, TIMELESS, PSMA4, CLIP1, STMN1, ANAPC7, NEK4, DST, SEPT7, UBA52, BBS4, CCDC99, BLM, NEK2, NEK1, TIPIN, NEDD9, ANAPC10, SESN2, ITGB1, SESN1, SPC24, SPC25, PSMB6, PSMB1, NCAPG2, KATNA1, PSMB2,…	2397	565	13528	1.708100	5.903258e-10	1.967753e-10	2.519873e-10
no Peak	cell cycle	217	0.649447820	4.366409e-13	RAD51C, S100A6, DBF4B, XRCC2, PTTG1, CD2AP, SART1, CTNNB1, CUL3, CUL5, APP, RSPH1, VPS4B, NUP37, CUL1, CCAR1, ANAPC1, ANAPC2, ZC3HC1, LIG1, PIM1, SKP1, MYH9, NCAPD2, RAD1, MAPK1, DCLRE1A, MAPK6, ANAPC7, NEK4, CCDC99, NEK2, NEK1, NCAPG2, SKA3, FBXO5, SKA1, LFNG, TCF3, YEATS4, TP53BP2, PCNT, SMAD3, NDC80, TPD52L1, PMF1, CDC27, RNF8, NOTCH2, NOLC1, RAD54B, CHAF1B, CCNT2, GAS2L3, SPIN1, MLH3, LATS2, …	2397	776	13528	1.578206	1.920390e-09	4.800974e-10	8.197443e-10
no Peak	transcription	491	1.469487924	6.414433e-13	ZNF57, ZNF639, ASCC1, MED22, ZNF253, MXI1, MED21, ZNF254, CITED4, ZNF251, CTNNB1, EPC1, ZNF777, TAF5L, EPC2, CDCA7, PHTF2, ZNF248, PHTF1, ZNF107, ZNF394, MTERFD3, CCAR1, ZNF43, ZNF644, RREB1, ZNF507, TAF4B, RCOR1, ZHX2, ZNF791, HMG20A, ZNF503, MED13, MED10, MED19, ZNF787, ZNF236, MSX1, ZNF784, MED15, PTRF, MED16, ASCC3, MED17, ZNF786, ZNF785, ZZZ3, TRAPPC2, CRTC3, ZNF614, ZNF611, ZNF77, NFKBIB, Z…	2397	2101	13528	1.318928	2.821259e-09	5.642519e-10	1.204303e-09
no Peak	response to DNA damage stimulus	123	0.368120193	9.248948e-13	XRCC5, MRPS35, RAD51C, XRCC4, MICA, XRCC2, XRCC6, RPS27L, PTTG1, FOXO3, SETX, IGHMBP2, EPC2, CRY1, PMS1, LIG1, TOPBP1, FOXN3, RAD1, MAPK1, DCLRE1A, RFC3, DCLRE1B, TIMELESS, FBXO18, RAD23B, BLM, NEK1, HUS1, TIPIN, UBE2V2, SESN1, HSPA1L, POLN, DYRK2, BRIP1, SMG1, WRN, BRCA1, UIMC1, PTPN11, RNF8, POLD3, UACA, VCP, PCNA, RAD54B, PARP4, PARP1, ABL1, PARP2, CHAF1B, NBN, ZMAT3, TERF2IP, MLH3, TRIAP1, HM…	2397	373	13528	1.861066	4.067828e-09	6.779713e-10	1.736411e-09
no Peak	cellular macromolecule catabolic process	200	0.598569419	1.575986e-11	DZIP3, PPP2R5C, RNF216, ZNRF1, CD2AP, ISG20, CUL3, CUL5, WWP2, BTBD1, APOE, CUL1, ANAPC1, ANAPC2, ZC3HC1, PAN3, UBE2J1, ZHX2, UBR1, SKP1, UBE2J2, MYH9, BRAP, HUWE1, BACE2, FBXL5, PIAS2, AMFR, ANAPC7, EIF2C3, RAD23B, ASB13, RAB40B, ARIH1, FBXO5, FBXO4, FBXO8, SPOP, FOXRED2, CDC27, RNF8, TULP4, RNF6, UBA2, POP1, SMURF2, LDLR, UBE2G1, SENP8, NFKB1, SENP7, PARN, USP12, FBXL12, NSMCE2, NEURL1B, USP10,…	2397	725	13528	1.556889	6.931176e-08	9.901681e-09	2.958680e-08
no Peak	cellular protein catabolic process	171	0.511776853	5.370450e-11	DZIP3, BTRC, IDE, PPP2R5C, RNF216, SAE1, ZNRF1, CD2AP, CNOT4, CUL3, CUL5, WWP2, BTBD1, FBXO27, RNF149, FBXO21, CUL1, ANAPC1, ANAPC2, ZC3HC1, ENC1, UBE2J1, SOCS6, UBR1, SOCS5, UBE2J2, SKP1, MYH9, BRAP, MIB1, SEC61B, HUWE1, BACE2, FBXO18, PSMA4, FBXL5, RNF138, PIAS2, AMFR, ANAPC7, UBA52, RAD23B, DERL2, ANAPC10, NEDD8, UBE2V2, ASB13, RAB40B, ARIH1, FBXW7, FBXW8, UBE2D2, PSMB6, PSMB1, PSMB2, FBXO5, R…	2397	603	13528	1.600458	2.361923e-07	2.952404e-08	1.008223e-07
no Peak	proteolysis involved in cellular protein catabolic process	170	0.508784006	6.686051e-11	DZIP3, BTRC, IDE, PPP2R5C, RNF216, SAE1, ZNRF1, CD2AP, CNOT4, CUL3, CUL5, WWP2, BTBD1, FBXO27, RNF149, FBXO21, CUL1, ANAPC1, ANAPC2, ZC3HC1, ENC1, UBE2J1, SOCS6, UBR1, SOCS5, UBE2J2, SKP1, MYH9, BRAP, MIB1, SEC61B, HUWE1, BACE2, FBXO18, PSMA4, FBXL5, RNF138, PIAS2, AMFR, ANAPC7, UBA52, RAD23B, DERL2, ANAPC10, NEDD8, UBE2V2, ASB13, RAB40B, ARIH1, FBXW7, FBXW8, UBE2D2, PSMB6, PSMB1, PSMB2, FBXO5, R…	2397	600	13528	1.599054	2.940525e-07	3.267251e-08	1.255209e-07
no Peak	modification-dependent macromolecule catabolic process	164	0.490826924	7.414141e-11	DZIP3, BTRC, PPP2R5C, RNF216, SAE1, ZNRF1, CD2AP, CNOT4, CUL3, CUL5, WWP2, BTBD1, FBXO27, RNF149, FBXO21, CUL1, ANAPC1, ANAPC2, ZC3HC1, ENC1, UBE2J1, SOCS6, UBR1, SOCS5, UBE2J2, SKP1, BRAP, MIB1, SEC61B, HUWE1, FBXO18, PSMA4, FBXL5, RNF138, PIAS2, AMFR, ANAPC7, UBA52, RAD23B, DERL2, ANAPC10, UBE2V2, NEDD8, ASB13, RAB40B, ARIH1, FBXW7, FBXW8, UBE2D2, PSMB6, PSMB1, PSMB2, FBXO5, RNF11, FBXW2, FBXO4…	2397	574	13528	1.612492	3.260736e-07	3.260737e-08	1.391896e-07
no Peak	modification-dependent protein catabolic process	164	0.490826924	7.414141e-11	DZIP3, BTRC, PPP2R5C, RNF216, SAE1, ZNRF1, CD2AP, CNOT4, CUL3, CUL5, WWP2, BTBD1, FBXO27, RNF149, FBXO21, CUL1, ANAPC1, ANAPC2, ZC3HC1, ENC1, UBE2J1, SOCS6, UBR1, SOCS5, UBE2J2, SKP1, BRAP, MIB1, SEC61B, HUWE1, FBXO18, PSMA4, FBXL5, RNF138, PIAS2, AMFR, ANAPC7, UBA52, RAD23B, DERL2, ANAPC10, UBE2V2, NEDD8, ASB13, RAB40B, ARIH1, FBXW7, FBXW8, UBE2D2, PSMB6, PSMB1, PSMB2, FBXO5, RNF11, FBXW2, FBXO4…	2397	574	13528	1.612492	3.260736e-07	3.260737e-08	1.391896e-07
no Peak	DNA metabolic process	148	0.442941370	1.107636e-10	XRCC5, RAD51C, XRCC4, XRCC2, DBF4, XRCC6, RPS27L, C16ORF75, PTTG1, MCM10, SETX, ISG20, PRIM1, IGHMBP2, EPC2, MLL5, PRIM2, CRY1, MYST2, PMS1, DFFA, LIG1, MND1, TOPBP1, RNASEH2A, RMI1, RAD1, RFC3, DCLRE1A, KRBA2, DCLRE1B, FBXO18, RAD23B, TMX1, BLM, HUS1, TIPIN, UBE2V2, HSPA1L, POLE3, POLN, FBXO4, DNMT3B, GINS3, GINS4, PPFIBP2, BRIP1, SMG1, WRN, TSN, BRCA1, UIMC1, TNKS1BP1, POLD3, RNF8, VCP, PCNA, D…	2397	506	13528	1.650733	4.871383e-07	4.428531e-08	2.079425e-07
no Peak	protein catabolic process	174	0.520755395	1.183837e-10	DZIP3, BTRC, IDE, PPP2R5C, USE1, SAE1, RNF216, ZNRF1, CD2AP, CNOT4, CUL3, CUL5, WWP2, BTBD1, FBXO27, RNF149, FBXO21, CUL1, ANAPC1, ANAPC2, ZC3HC1, ENC1, UBE2J1, SOCS6, UBR1, SOCS5, UBE2J2, SKP1, MYH9, BRAP, MIB1, SEC61B, HUWE1, BACE2, FBXO18, PSMA4, FBXL5, RNF138, PIAS2, YME1L1, AMFR, ANAPC7, UBA52, RAD23B, DERL2, ANAPC10, NEDD8, UBE2V2, ASB13, RAB40B, ARIH1, FBXW7, FBXW8, UBE2D2, PSMB6, PSMB1, P…	2397	622	13528	1.578790	5.206516e-07	4.338764e-08	2.222482e-07
no Peak	macromolecule catabolic process	207	0.619519349	3.238912e-10	DZIP3, PPP2R5C, USE1, RNF216, ZNRF1, CD2AP, ISG20, CUL3, CUL5, BTBD1, WWP2, APOE, CUL1, ANAPC1, ANAPC2, PAN3, ZC3HC1, UBE2J1, ZHX2, UBR1, SKP1, UBE2J2, MYH9, BRAP, HUWE1, BACE2, FBXL5, YME1L1, PIAS2, AMFR, ANAPC7, EIF2C3, RAD23B, ASB13, RAB40B, ARIH1, FBXO5, FBXO4, FBXO8, SPOP, FOXRED2, CDC27, RNF8, TULP4, RNF6, UBA2, POP1, SMURF2, LDLR, UBE2G1, SENP8, NFKB1, SENP7, PARN, USP12, FBXL12, NSMCE2, N…	2397	781	13528	1.495839	1.424473e-06	1.095749e-07	6.080586e-07
no Peak	cell cycle phase	125	0.374105887	4.197553e-10	RAD51C, XRCC2, PRC1, DBF4, PTTG1, CD2AP, CUL3, CUL5, APP, RSPH1, NUP37, TUBG1, ASPM, CUL1, ANAPC1, ANAPC2, ZC3HC1, SGOL1, PIM1, MND1, MYH9, FOXN3, TACC2, NCAPD2, RAD1, DCLRE1A, TIMELESS, CLIP1, STMN1, ANAPC7, NEK4, SEPT7, CCDC99, BLM, NEK2, NEK1, TIPIN, NEDD9, ANAPC10, ITGB1, SPC24, SPC25, NCAPG2, KATNA1, FBXO5, SKA3, SKA1, LFNG, TCF3, TAF2, YEATS4, CKAP5, PCNT, NDC80, TPD52L1, PMF1, CDC27, RNF8,…	2397	414	13528	1.704022	1.846082e-06	1.318631e-07	7.880294e-07
no Peak	negative regulation of macromolecule metabolic process	195	0.583605184	9.218331e-10	EIF2C2, ZNF639, ZNF254, CTNNB1, EPC1, SIN3A, WWP2, EIF2B3, EIF2B5, ANAPC1, PTPRK, ANAPC2, ZHX2, MSX1, PRDM6, BACE2, ANAPC7, EIF2C3, HUS1, BCL2L1, HEXIM2, HEXIM1, DRAP1, FBXO5, BCOR, DNMT3B, NKRF, BMP4, SMAD7, SMAD6, SMAD4, NDFIP1, RYBP, SMAD3, SMAD2, SKI, SMAD1, CDC27, DLX2, DLX1, TRPS1, SMURF2, NCOR2, CRYM, KLF4, ZNF675, NFKB1, TERF2IP, KCNIP3, PBXIP1, NR2F2, ZNF496, MYC, CDC6, TLE1, RBBP7, FLNA…	2397	734	13528	1.499354	4.054214e-06	2.702814e-07	1.730607e-06
no Peak	cellular response to stress	158	0.472869841	1.089645e-09	XRCC5, MRPS35, RAD51C, XRCC4, MICA, XRCC2, XRCC6, RPS27L, PTTG1, FOXO3, SETX, IGHMBP2, EPC2, COL4A3BP, GAB1, CRY1, EIF2B3, PMS1, EIF2B5, SYK, PTPRK, TNIK, LIG1, HRK, TOPBP1, FOXN3, RAD1, MAPK1, RFC3, DCLRE1A, HIF1A, DCLRE1B, TIMELESS, FBXO18, MAPK9, NFE2L2, AMFR, RAD23B, DERL2, CAV1, BLM, NEK1, HUS1, TIPIN, DUSP10, BMPR2, UBE2V2, SESN1, SLC11A2, HSPA1L, POLN, DYRK2, HERPUD1, TAOK3, MAP2K4, BRIP1,…	2397	566	13528	1.575456	4.792246e-06	2.995160e-07	2.045649e-06
no Peak	protein localization	225	0.673390596	2.119033e-09	SEC31A, LTBP2, USE1, VPS33B, MXI1, CTNNB1, HOOK1, VPS4B, NUP37, STAM, VPS13B, NUP35, RAB27B, RAB20, RAB21, PTPRK, MYH9, YIF1A, VTI1A, MAPK1, RAB18, BACE2, RAB12, RAB10, SDAD1, CCDC99, MTX3, NFKBIB, NFKBIA, AKAP10, CCDC91, ARF6, CHCHD4, RIMS2, RAB40B, STX12, STX16, STX10, TRAM1, SEC23IP, SRP54, RASEF, NDC80, ARFIP1, TRPS1, ARF4, PCNA, BET1L, GOSR1, RERE, AP1AR, TIMM17A, ZMAT3, AP2S1, AP3S1, MLH3, …	2397	882	13528	1.439725	9.319465e-06	5.482063e-07	3.978176e-06
no Peak	DNA repair	92	0.275341933	2.415734e-09	XRCC5, XRCC4, RAD51C, NBN, XRCC2, XRCC6, RPS27L, PTTG1, MLH3, SETX, IGHMBP2, EPC2, NSMCE2, FANCF, FANCG, POLG2, CRY1, FANCA, WDR33, PMS1, FANCC, BRCC3, LIG1, DDB1, GTF2H3, APTX, MBD4, TOPBP1, GTF2H5, UBE2B, RAD50, XRCC6BP1, C9ORF80, JMY, GTF2H1, RBBP8, RAD1, DCLRE1A, RFC3, DCLRE1B, FBXO18, GADD45G, GADD45A, RAD23B, BLM, WRNIP1, HUS1, MGMT, PML, POLA1, PRKDC, UBE2V2, RPA3, HSPA1L, RPA1, RPA2, SUMO…	2397	284	13528	1.828248	1.062434e-05	5.902441e-07	4.535188e-06
no Peak	chromosome organization	137	0.410020052	7.038120e-09	XRCC5, RAD51C, XRCC6, HIRA, CBX3, CBX1, PTTG1, CBX8, CBX7, CBX5, EPC1, EPC2, MLL5, TAF5L, H2AFV, SEP15, EED, MYST2, MYST3, RCOR1, RBL1, HMG20A, H2AFJ, ARID1B, NCAPD2, SUZ12, CHRAC1, SMARCE1, HUWE1, PRDM6, SMARCA5, SMARCA4, SUV420H1, CCDC99, BLM, TADA3, NEK2, TADA1, SOX6, HSPA1L, CDYL2, NCAPG2, NPM1, TAF9, FBXO4, BCOR, DNMT3B, YEATS4, EHMT1, CREBBP, WHSC1, NDC80, WRN, UIMC1, CTR9, RNF8, TNKS1BP1, …	2397	485	13528	1.594206	3.095317e-05	1.629138e-06	1.321304e-05
no Peak	regulation of transcription from RNA polymerase II promoter	187	0.559662407	3.009297e-08	JDP2, XRCC6, STAT5B, TGFB3, HIRA, FOXO1, CNOT2, FOXO3, MED22, CNOT7, MED21, ZNF254, CTNNB1, IGHMBP2, EPC1, GABPB1, GATA2, APP, SIN3A, GATA6, DDX20, ZNF593, GABPA, RBL1, ZHX2, FOXN1, ZNF189, SIX4, MED13, HES6, CSDA, PKIA, AHR, MED10, SUZ12, MED19, MSX1, HIF1A, MED15, SMARCE1, MTF1, MED16, TIAL1, MED17, VEGFA, SMARCA5, SMARCA4, CNBP, TADA3, TFAP4, LITAF, ONECUT2, NFKBIA, NEDD8, SOX6, HEXIM2, HEXIM1…	2397	727	13528	1.451686	1.323401e-04	6.617422e-06	5.649515e-05
no Peak	RNA processing	148	0.442941370	3.573456e-08	NAF1, RNASEL, EIF2C2, RNMT, RBM5, SNRPD1, RP9, SNRPD2, SYNCRIP, ZNF638, SART3, SART1, SETX, SMNDC1, PUS7L, APP, LSM5, DDX20, DHX35, TGS1, CCAR1, CLNS1A, RPP25, SNRPA1, SF3B14, HNRNPR, BICD1, HNRNPU, PCF11, AQR, TRMT11, TRMT12, SNRPB, SLU7, SNRPC, MRPL44, PUS1, NHP2L1, FARS2, PPIL1, DUSP11, PIN4, PUS7, ZFC3H1, DDX46, AGGF1, CNOT6L, FRG1, QTRTD1, HNRNPD, C19ORF29, PPIL3, SPOP, RPS24, PRPF40A, UTP23…	2397	547	13528	1.527003	1.571483e-04	7.483811e-06	6.708641e-05
no Peak	protein transport	194	0.580612337	3.653757e-08	SEC31A, LTBP2, USE1, VPS33B, HOOK1, VPS4B, STAM, NUP37, VPS13B, NUP35, RAB27B, RAB20, RAB21, MYH9, YIF1A, VTI1A, MAPK1, RAB18, BACE2, RAB12, RAB10, SDAD1, MTX3, NFKBIA, CCDC91, ARF6, CHCHD4, RIMS2, RAB40B, STX12, STX16, TRAM1, SEC23IP, STX10, SRP54, RASEF, ARFIP1, TRPS1, ARF4, PCNA, BET1L, GOSR1, RERE, TIMM17A, ZMAT3, AP2S1, AP1AR, AP3S1, PDIA4, CANX, COPB1, AP3B2, RAB6A, DNAJC19, AP3B1, ZDHHC17,…	2397	762	13528	1.436853	1.606793e-04	7.304165e-06	6.859393e-05
no Peak	establishment of protein localization	195	0.583605184	4.656885e-08	SEC31A, LTBP2, USE1, VPS33B, HOOK1, VPS4B, STAM, NUP37, VPS13B, NUP35, RAB27B, RAB20, RAB21, MYH9, YIF1A, VTI1A, MAPK1, RAB18, BACE2, RAB12, RAB10, SDAD1, MTX3, NFKBIA, CCDC91, ARF6, CHCHD4, RIMS2, RAB40B, STX12, STX16, TRAM1, SEC23IP, STX10, SRP54, RASEF, ARFIP1, TRPS1, ARF4, PCNA, BET1L, GOSR1, RERE, AP1AR, TIMM17A, ZMAT3, AP2S1, AP3S1, PDIA4, CANX, COPB1, AP3B2, RAB6A, DNAJC19, AP3B1, FLNA, ZD…	2397	769	13528	1.431113	2.047888e-04	8.904734e-06	8.742618e-05
no Peak	ubiquitin-dependent protein catabolic process	78	0.233442073	5.664407e-08	USPL1, BTRC, UBE2G1, PPP2R5C, CD2AP, CUL3, CUL5, USP12, PSMD2, PSMD3, FBXL12, PSMD4, USP10, PSMD5, FBXO21, USP15, CUL1, ANAPC1, TBL1XR1, ANAPC2, DDB1, UBR1, SKP1, UBE2H, UBE2B, SEC61B, PSMA4, MDM2, UCHL3, SIAH1, AMFR, UBB, ANAPC7, USP25, UBA52, USP7, RAD23B, DERL2, C10ORF46, USP9X, ANAPC10, NEDD8, EDEM3, EDEM1, PSMF1, ARIH1, PSMB6, UBE2D2, PSMB1, SQSTM1, MAP3K1, USP39, PSMB2, RNF11, FBXO4, UBE2D1…	2397	242	13528	1.819051	2.490896e-04	1.037997e-05	1.063409e-04
no Peak	intracellular transport	170	0.508784006	8.957677e-08	ENAH, SEC31A, LTBP2, XPO6, AP4E1, AP1G1, USE1, TGFB3, MIPEP, CNO, TAPBP, HOOK1, APP, GBF1, APOE, VPS4B, STAM, SAR1B, SAR1A, NUP133, OPA1, KIF5B, NUPL2, MYH9, VTI1A, TIMM8A, MAPK1, SEC61B, ARRB1, USO1, DST, VPS26A, LRPPRC, SEC61G, TRAPPC3, TRAPPC2, PACS1, SNX9, BBS4, TMX1, DERL2, STX8, SNX6, NAPG, AGFG1, MTX3, STAM2, SNX2, SNX1, NFKBIA, BCL2L1, RIMS2, STX12, CSE1L, BLOC1S3, STX16, NPM1, STX10, TRA…	2397	657	13528	1.460324	3.938811e-04	1.575822e-05	1.681672e-04
no Peak	cellular macromolecule localization	117	0.350163110	9.579299e-08	LTBP2, AP4E1, XPO6, AP1G1, TGFB3, MIPEP, CTNNB1, STAM, SAR1B, SAR1A, PTPRK, NUPL2, BICD1, VTI1A, TIMM8A, TNKS2, MAPK1, SEC61B, USO1, SEC61G, PACS1, SNX9, BBS4, DERL2, CCDC99, SNX6, NAPG, MTX3, STAM2, SNX2, SNX1, NFKBIA, RIMS2, STX12, CSE1L, NPM1, STX16, STX10, SEC23IP, TRAM1, SRP54, HTT, CASC3, ARFIP1, VCP, TOMM70A, TRPS1, PTTG1IP, PCNA, SPTBN1, SEC13, GOSR1, RERE, COPA, SEC24B, CLTA, SEC24A, MLP…	2397	414	13528	1.594965	4.212088e-04	1.620362e-05	1.798372e-04
no Peak	negative regulation of gene expression	136	0.407027205	1.601988e-07	EIF2C2, JDP2, ZNF639, CBX3, ZNF254, CBX5, CTNNB1, IGHMBP2, EPC1, SIN3A, WWP2, EED, DDX20, INSR, MYST3, PTPRK, ZNF593, GABPA, RBL1, ZHX2, HRK, ZNF189, CSDA, PKIA, FOXN3, SUZ12, MSX1, SMARCE1, TIMELESS, PRDM6, EIF2C3, SMARCA4, GCLC, SNX6, BCL2L1, ELK3, SOX6, ZC3H8, HEXIM2, HEXIM1, DRAP1, BCOR, RUNX2, DNMT3B, NKRF, BMP4, EHMT1, RFX5, SMAD7, SMAD4, NDFIP1, RYBP, SMAD3, SKI, SMAD2, SMAD1, MYPOP, BRCA1…	2397	504	13528	1.522909	7.043063e-04	2.609427e-05	3.007495e-04
no Peak	negative regulation of nitrogen compound metabolic process	139	0.416005746	1.855386e-07	JDP2, TGFB3, ZNF639, CBX3, ZNF254, CBX5, CTNNB1, IGHMBP2, EPC1, SIN3A, EED, DDX20, MYST3, PTPRK, ZNF593, GABPA, RBL1, ZHX2, ZNF189, CSDA, PKIA, FOXN3, SUZ12, MSX1, SMARCE1, TIMELESS, PRDM6, SMARCA4, CAV1, GCLC, SNX6, BLM, HUS1, TIPIN, ELK3, SOX6, ZC3H8, HEXIM2, HEXIM1, DRAP1, NPM1, BCOR, RUNX2, DNMT3B, NKRF, EHMT1, RFX5, SMAD7, SMAD4, NDFIP1, RYBP, SMAD3, SKI, SMAD2, MYPOP, BRCA1, UIMC1, FOXP2, H…	2397	519	13528	1.511517	8.156659e-04	2.914239e-05	3.483210e-04
no Peak	negative regulation of nucleobase, nucleoside, nucleotide and nucleic acid metabolic process	137	0.410020052	2.438156e-07	JDP2, TGFB3, ZNF639, CBX3, ZNF254, CBX5, CTNNB1, IGHMBP2, EPC1, SIN3A, EED, DDX20, MYST3, PTPRK, ZNF593, GABPA, RBL1, ZHX2, ZNF189, CSDA, PKIA, FOXN3, SUZ12, MSX1, SMARCE1, TIMELESS, PRDM6, SMARCA4, GCLC, SNX6, BLM, HUS1, TIPIN, ELK3, SOX6, ZC3H8, HEXIM2, HEXIM1, DRAP1, NPM1, BCOR, RUNX2, DNMT3B, NKRF, EHMT1, RFX5, SMAD7, SMAD4, NDFIP1, RYBP, SMAD3, SKI, SMAD2, MYPOP, BRCA1, UIMC1, FOXP2, HDAC4, …	2397	512	13528	1.510136	1.071727e-03	3.697522e-05	4.577273e-04
no Peak	cellular protein localization	114	0.341184569	4.048353e-07	LTBP2, AP4E1, XPO6, AP1G1, TGFB3, MIPEP, CTNNB1, STAM, SAR1B, SAR1A, PTPRK, NUPL2, VTI1A, TIMM8A, TNKS2, MAPK1, SEC61B, USO1, SEC61G, PACS1, SNX9, BBS4, DERL2, CCDC99, SNX6, NAPG, MTX3, STAM2, SNX2, NFKBIA, SNX1, RIMS2, STX12, CSE1L, NPM1, STX16, SEC23IP, TRAM1, STX10, SRP54, HTT, ARFIP1, VCP, TOMM70A, TRPS1, PTTG1IP, PCNA, SPTBN1, SEC13, GOSR1, RERE, COPA, SEC24B, CLTA, SEC24A, MLPH, AP2S1, TIMM…	2397	411	13528	1.565412	1.778882e-03	5.934711e-05	7.600166e-04
no Peak	positive regulation of apoptosis	118	0.353155957	4.541001e-07	DLC1, CADM1, RBM5, TGFB3, RPS27L, PMAIP1, FOXO3, SART1, CRADD, CTNNBL1, SMNDC1, CUL3, APP, CUL5, APOE, TIA1, ZNF443, DAP, DDX20, WWOX, CUL1, NUDT2, PTPRF, DFFA, HRK, FADD, STK3, MAPK1, TIAL1, MAPK9, UBA52, KALRN, TRAF2, STK17B, BCL2L1, ZC3H8, MTCH1, DYRK2, FGD3, B4GALT1, ABR, TM2D1, HTT, TP53BP2, TGFBR1, SMAD3, RPS6, VAV2, BRCA1, NOTCH2, NOTCH1, UACA, IKBKG, MUC5AC, HSPD1, BMP7, ABL1, DAP3, SH3RF…	2397	430	13528	1.548742	1.995140e-03	6.442156e-05	8.525033e-04
no Peak	positive regulation of cell death	119	0.356148804	4.736338e-07	DLC1, CADM1, RBM5, TGFB3, RPS27L, PMAIP1, FOXO3, SART1, CRADD, CTNNBL1, SMNDC1, CUL3, APP, CUL5, APOE, TIA1, ZNF443, DAP, DDX20, WWOX, CUL1, NUDT2, PTPRF, DFFA, HRK, FADD, STK3, MAPK1, TIAL1, MAPK9, UBA52, KALRN, TRAF2, STK17B, BCL2L1, ZC3H8, MTCH1, DYRK2, FGD3, B4GALT1, BMP4, ABR, TM2D1, HTT, TP53BP2, TGFBR1, SMAD3, RPS6, VAV2, BRCA1, NOTCH2, NOTCH1, UACA, IKBKG, MUC5AC, HSPD1, BMP7, ABL1, DAP3,…	2397	435	13528	1.543915	2.080874e-03	6.509294e-05	8.891746e-04
no Peak	M phase of mitotic cell cycle	71	0.212492144	4.823744e-07	PTTG1, CD2AP, LATS2, FAM83D, KIF2C, NUP37, ASPM, ZW10, ANAPC1, CDC6, ANAPC2, KIF11, ZC3HC1, SGOL1, KIF15, TPX2, NUSAP1, NCAPD2, EML4, DCLRE1A, TIMELESS, NSL1, CLIP1, MAPRE1, HAUS8, ANAPC7, NEK4, MAPRE3, SEPT7, CCDC99, NEK2, NEK1, USP9X, HAUS2, HAUS1, CETN3, TIPIN, NEDD9, ANAPC10, SPC24, SPC25, NCAPH, NCAPG2, KATNA1, BUB1, FBXO5, SKA3, SKA1, BUB3, TERF1, APC, YEATS4, TXNL4B, PDS5A, CKAP5, DLGAP5, …	2397	224	13528	1.788858	2.119234e-03	6.428530e-05	9.055836e-04
no Peak	mitosis	70	0.209499297	4.999879e-07	PTTG1, CD2AP, LATS2, FAM83D, KIF2C, NUP37, ASPM, ZW10, ANAPC1, CDC6, ANAPC2, KIF11, ZC3HC1, SGOL1, KIF15, TPX2, NUSAP1, NCAPD2, EML4, DCLRE1A, TIMELESS, NSL1, CLIP1, MAPRE1, HAUS8, ANAPC7, NEK4, SEPT7, MAPRE3, CCDC99, NEK2, NEK1, USP9X, HAUS2, HAUS1, CETN3, TIPIN, NEDD9, ANAPC10, SPC24, SPC25, NCAPH, NCAPG2, KATNA1, BUB1, FBXO5, SKA3, SKA1, BUB3, TERF1, APC, YEATS4, TXNL4B, PDS5A, CKAP5, DLGAP5, …	2397	220	13528	1.795730	2.196531e-03	6.467283e-05	9.386502e-04
no Peak	nuclear division	70	0.209499297	4.999879e-07	PTTG1, CD2AP, LATS2, FAM83D, KIF2C, NUP37, ASPM, ZW10, ANAPC1, CDC6, ANAPC2, KIF11, ZC3HC1, SGOL1, KIF15, TPX2, NUSAP1, NCAPD2, EML4, DCLRE1A, TIMELESS, NSL1, CLIP1, MAPRE1, HAUS8, ANAPC7, NEK4, SEPT7, MAPRE3, CCDC99, NEK2, NEK1, USP9X, HAUS2, HAUS1, CETN3, TIPIN, NEDD9, ANAPC10, SPC24, SPC25, NCAPH, NCAPG2, KATNA1, BUB1, FBXO5, SKA3, SKA1, BUB3, TERF1, APC, YEATS4, TXNL4B, PDS5A, CKAP5, DLGAP5, …	2397	220	13528	1.795730	2.196531e-03	6.467283e-05	9.386502e-04
no Peak	organelle fission	72	0.215484991	5.587980e-07	COX10, PTTG1, CD2AP, LATS2, FAM83D, KIF2C, NUP37, ASPM, ZW10, ANAPC1, CDC6, ANAPC2, OPA1, KIF11, ZC3HC1, SGOL1, KIF15, TPX2, NUSAP1, NCAPD2, EML4, DCLRE1A, TIMELESS, NSL1, CLIP1, MAPRE1, HAUS8, ANAPC7, NEK4, SEPT7, MAPRE3, CCDC99, NEK2, NEK1, USP9X, HAUS2, HAUS1, CETN3, TIPIN, NEDD9, ANAPC10, SPC24, SPC25, NCAPH, NCAPG2, KATNA1, BUB1, FBXO5, SKA3, SKA1, BUB3, TERF1, APC, YEATS4, TXNL4B, PDS5A, CK…	2397	229	13528	1.774445	2.454577e-03	7.021452e-05	1.049057e-03
no Peak	positive regulation of programmed cell death	118	0.353155957	6.685380e-07	DLC1, CADM1, RBM5, TGFB3, RPS27L, PMAIP1, FOXO3, SART1, CRADD, CTNNBL1, SMNDC1, CUL3, APP, CUL5, APOE, TIA1, ZNF443, DAP, DDX20, WWOX, CUL1, NUDT2, PTPRF, DFFA, HRK, FADD, STK3, MAPK1, TIAL1, MAPK9, UBA52, KALRN, TRAF2, STK17B, BCL2L1, ZC3H8, MTCH1, DYRK2, FGD3, B4GALT1, ABR, TM2D1, HTT, TP53BP2, TGFBR1, SMAD3, RPS6, VAV2, BRCA1, NOTCH2, NOTCH1, UACA, IKBKG, MUC5AC, HSPD1, BMP7, ABL1, DAP3, SH3RF…	2397	433	13528	1.538012	2.935913e-03	8.166975e-05	1.255075e-03
no Peak	negative regulation of macromolecule biosynthetic process	142	0.424984288	9.518834e-07	JDP2, EIF2C2, TGFB3, ZNF639, CBX3, ZNF254, CBX5, CTNNB1, IGHMBP2, EPC1, SIN3A, TIA1, EED, DDX20, EIF2B3, MYST3, EIF2B5, PTPRK, ZNF593, GABPA, RBL1, ZHX2, ZNF189, CSDA, PKIA, FOXN3, SUZ12, MSX1, SMARCE1, TIMELESS, BACE2, PRDM6, EIF2C3, SMARCA4, GCLC, SNX6, BLM, HUS1, TIPIN, ELK3, SOX6, ZC3H8, HEXIM2, HEXIM1, DRAP1, ITGAV, BCOR, RUNX2, DNMT3B, PGGT1B, NKRF, EHMT1, RFX5, SMAD7, SMAD4, RYBP, SMAD3, S…	2397	547	13528	1.465098	4.177635e-03	1.131391e-04	1.787007e-03
no Peak	M phase	94	0.281327627	1.173178e-06	RAD51C, NBN, XRCC2, PRC1, MLH3, PTTG1, CD2AP, LATS2, FAM83D, KIF2C, RSPH1, NUP37, RANBP1, TUBG1, FANCA, ASPM, ZW10, ANAPC1, ANAPC2, CDC6, KIF11, ZC3HC1, SGOL1, KIF15, TPX2, NUSAP1, MND1, MYH9, RAD50, TACC2, NCAPD2, EML4, RAD1, DCLRE1A, TIMELESS, NSL1, TOP3A, CLIP1, MAPRE1, STMN1, HAUS8, ANAPC7, NEK4, MAPRE3, SEPT7, CCDC99, NEK2, NEK1, USP9X, HAUS2, HAUS1, CETN3, TIPIN, NEDD9, ANAPC10, RPA1, SPC24…	2397	329	13528	1.612492	5.146352e-03	1.357708e-04	2.202448e-03
no Peak	negative regulation of biosynthetic process	147	0.439948523	1.242288e-06	EIF2C2, JDP2, TGFB3, ZNF639, CBX3, ZNF254, CBX5, CTNNB1, IGHMBP2, EPC1, SIN3A, APOE, TIA1, EED, DDX20, EIF2B3, MYST3, EIF2B5, PTPRK, ZNF593, GABPA, RBL1, ZHX2, ZNF189, CSDA, PKIA, FOXN3, SUZ12, MSX1, SMARCE1, TIMELESS, BACE2, PRDM6, EIF2C3, SMARCA4, CAV1, GCLC, SNX6, BLM, HUS1, TIPIN, ELK3, SOX6, ZC3H8, HEXIM2, HEXIM1, DRAP1, ITGAV, BCOR, RUNX2, DNMT3B, PGGT1B, NKRF, EHMT1, RFX5, SMAD7, SMAD4, RY…	2397	573	13528	1.447866	5.448687e-03	1.400821e-04	2.332189e-03
no Peak	positive regulation of macromolecule metabolic process	206	0.616526502	1.285732e-06	DLC1, AURKAIP1, XRCC6, STAT5B, MED21, CITED4, CTNNB1, EPC1, APP, APOE, CUL1, EIF2B5, SYK, ANAPC1, ANAPC2, PCBD1, MED13, SKP1, MAPK1, MTF1, MED17, VEGFA, MAPK9, PIAS2, ANAPC7, TMX1, NFKBIA, PEMT, FBXO5, FBXO4, TCF3, DNMT3B, NR1H3, KLF5, BMP4, KLF6, YEATS4, KLF7, SMAD7, TGFBR1, MAML1, CREBBP, SMAD4, NDFIP1, SMAD3, SMAD2, SMAD1, CDC27, RNF8, DLX2, NOTCH1, RNF6, RNF4, ETS2, BMP7, KLF4, ENY2, NFKB1, Z…	2397	857	13528	1.356600	5.638694e-03	1.413563e-04	2.413746e-03
no Peak	in utero embryonic development	58	0.173585132	1.551806e-06	GNA13, XRCC4, NBN, XRCC2, GNA12, TGFB3, MED21, CUL3, ACVR1B, GATA2, GATA6, COL4A3BP, MKL2, FLVCR1, GABPA, MBNL1, MYH9, CSDA, RBBP8, ASCL2, MIB1, HIF1A, MSX1, FOXC1, IFT88, MED1, ACVR1, SMARCA4, TAPT1, ZFAND5, FUT8, ELL, KEAP1, CDH1, EGLN1, BCL2L1, ITGB1, TPM1, RPA1, SLC30A1, TEAD4, DAD1, TERF2, CEBPA, CEBPB, TBX3, MSH2, TAF8, TGFBR1, MYO1E, SMAD2, PLK4, TJP1, SALL4, TULP3, CCNB2, PSMC4, MYH10	2397	176	13528	1.859863	6.801612e-03	1.664459e-04	2.913249e-03
no Peak	negative regulation of cellular biosynthetic process	144	0.430969982	1.563271e-06	JDP2, EIF2C2, TGFB3, ZNF639, CBX3, ZNF254, CBX5, CTNNB1, IGHMBP2, EPC1, SIN3A, TIA1, EED, DDX20, EIF2B3, MYST3, EIF2B5, PTPRK, ZNF593, GABPA, RBL1, ZHX2, ZNF189, CSDA, PKIA, FOXN3, SUZ12, MSX1, SMARCE1, TIMELESS, BACE2, PRDM6, EIF2C3, SMARCA4, CAV1, GCLC, SNX6, BLM, HUS1, TIPIN, ELK3, SOX6, ZC3H8, HEXIM2, HEXIM1, DRAP1, BCOR, RUNX2, DNMT3B, NKRF, EHMT1, RFX5, SMAD7, SMAD4, RYBP, SMAD3, SKI, SMAD2…	2397	561	13528	1.448656	6.851690e-03	1.636835e-04	2.934772e-03
no Peak	protein modification by small protein conjugation or removal	54	0.161613743	1.661651e-06	ENY2, DZIP3, COPS5, SAE1, CBX8, SENP7, WWP2, USP12, BRCC3, DDB1, UBE2H, RBBP6, UBE2B, SUZ12, MIB1, SENP1, HUWE1, FBXL5, MDM2, SIAH1, UBB, AMFR, UBA52, USP7, SUPT3H, ATG10, USP9X, NEDD8, UBE2V2, CDC73, UBE3C, SUMO3, SUMO1, FBXW7, UBE2D2, MAP3K1, RNF11, FBXO4, UBE2D1, FBXW11, RNF14, TSPAN17, ATG3, BRCA1, UIMC1, CTR9, RNF8, NOSIP, GSPT1, VCP, WDSUB1, USP46, BARD1, RNF41	2397	160	13528	1.904756	7.281308e-03	1.699378e-04	3.119461e-03
no Peak	induction of apoptosis	91	0.272349086	2.190941e-06	DLC1, SH3RF1, CADM1, ZMAT3, TGFB3, RPS27L, FOXO3, PMAIP1, PTEN, CRADD, SART1, SMNDC1, CUL3, ACVR1B, APP, CUL5, APOE, TIA1, HMOX1, TICAM1, ZNF443, DAP, DDX20, MYC, CUL1, WWOX, PRKCA, PPP2R1A, NUDT2, ARHGEF7, DFFA, AIFM1, HRK, ARHGEF17, MBD4, FADD, DAPK2, JMY, TNFRSF10A, MAPK1, PSEN1, BNIP1, TIAL1, NAIF1, MAPK9, UBB, UBA52, KALRN, BCLAF1, STK17B, PML, FEM1B, ITM2B, GCH1, UTP11L, PLEKHG2, ERCC6, SQS…	2397	320	13528	1.604933	9.589492e-03	2.189707e-04	4.113091e-03
no Peak	induction of programmed cell death	91	0.272349086	2.525083e-06	DLC1, SH3RF1, CADM1, ZMAT3, TGFB3, RPS27L, FOXO3, PMAIP1, PTEN, CRADD, SART1, SMNDC1, CUL3, ACVR1B, APP, CUL5, APOE, TIA1, HMOX1, TICAM1, ZNF443, DAP, DDX20, MYC, CUL1, WWOX, PRKCA, PPP2R1A, NUDT2, ARHGEF7, DFFA, AIFM1, HRK, ARHGEF17, MBD4, FADD, DAPK2, JMY, TNFRSF10A, MAPK1, PSEN1, BNIP1, TIAL1, NAIF1, MAPK9, UBB, UBA52, KALRN, BCLAF1, STK17B, PML, FEM1B, ITM2B, GCH1, UTP11L, PLEKHG2, ERCC6, SQS…	2397	321	13528	1.599933	1.104389e-02	2.467546e-04	4.740368e-03
no Peak	gastrulation	30	0.089785413	2.840475e-06	BBS4, HIRA, UGDH, BMPR2, CTNNB1, CUL3, WNT3, LHX1, MKKS, FRS2, PPAP2B, ODZ4, BMP4, GSC, HTT, LDB1, SMAD4, SMAD3, SMAD2, SMAD1, SLIT2, FOXC1, BMP7, EXT1, MESP1, EXT2, KLF4, BMPR1A, LRP5, ACVR1	2397	70	13528	2.418738	1.241472e-02	2.715376e-04	5.332443e-03
no Peak	negative regulation of transcription	121	0.362134499	2.931375e-06	JDP2, ZNF639, CBX3, ZNF254, CBX5, CTNNB1, IGHMBP2, EPC1, SIN3A, EED, DDX20, MYST3, PTPRK, ZNF593, GABPA, RBL1, ZHX2, ZNF189, CSDA, PKIA, FOXN3, SUZ12, MSX1, SMARCE1, TIMELESS, PRDM6, SMARCA4, GCLC, SNX6, ELK3, SOX6, ZC3H8, HEXIM2, HEXIM1, DRAP1, BCOR, RUNX2, DNMT3B, NKRF, EHMT1, RFX5, SMAD7, SMAD4, RYBP, SMAD3, SKI, SMAD2, MYPOP, BRCA1, UIMC1, FOXP2, DLX2, HDAC4, DLX1, SALL4, TRPS1, DNMT1, SMURF2…	2397	459	13528	1.487778	1.280946e-02	2.742647e-04	5.503086e-03
no Peak	chromatin modification	80	0.239427768	3.254010e-06	ENY2, BMI1, RSF1, EZH2, HIRA, CBX3, CBX8, CBX7, EPC1, EPC2, MLL5, TAF5L, RTF1, EED, KDM5A, MYST2, KDM5B, MYST3, BRD8, TBL1XR1, BRCC3, RCOR1, RBL1, HMG20A, BANP, ARID1B, HLTF, RBBP7, UBE2B, SUZ12, CHRAC1, SMARCE1, BPTF, HUWE1, PRDM6, ASH1L, SMARCA5, SUV420H1, SMARCA4, ING5, SMARCAD1, UTP3, SUPT3H, ING3, TADA3, HAT1, TADA1, CDC73, NR3C1, ARID2, CHD9, HJURP, KDM3A, TAF9, BCOR, DNMT3B, TERF2, TERF1, …	2397	274	13528	1.647802	1.420924e-02	2.981047e-04	6.108752e-03
no Peak	regulation of RNA metabolic process	391	1.170203214	4.677648e-06	XRCC6, ZNF57, ZNF639, SYNCRIP, MED22, ZNF253, MED21, ZNF254, ZNF251, CTNNB1, EPC1, ZNF777, APP, ZNF248, ZNF394, ZNF43, RREB1, TAF4B, ZHX2, ZNF791, HMG20A, MED13, MED10, MED19, ZNF236, MSX1, MED15, MED16, ZNF786, MED17, ZNF785, TRAPPC2, ZNF614, ZNF611, ZNF77, ZNF510, ZSCAN5A, NFKBIA, MYBL1, HEXIM2, HEXIM1, ZNF74, DNMT3B, TCF3, ZNF398, YEATS4, ZNF621, KLF16, ZNF627, TRPS1, ZNF114, RERE, BACH1, ZNF1…	2397	1813	13528	1.217151	2.036218e-02	4.197556e-04	8.781237e-03
no Peak	RNA splicing	81	0.242420615	7.421725e-06	RBM5, SNRPD1, SYNCRIP, SNRPD2, RP9, ZNF638, WBP4, DGCR14, SART1, SMNDC1, PCBP2, LSM5, DBR1, DHX35, DDX20, TGS1, ZCCHC8, CCAR1, CLNS1A, SRPK2, PPP2R1A, SNRPA1, SF3B14, SF1, PRPF3, CDC5L, MBNL1, HNRNPR, HNRNPU, TTF2, PCF11, SNRNP48, AQR, ESRP1, SNRPB, SLU7, RBM38, SNRPC, CPSF3, THOC2, CPSF2, CPSF1, PRPF38B, PPP4R2, NHP2L1, PPIL1, TRA2A, SF3B5, SF3B3, POLR2A, SF3B2, SF3B1, DDX46, CD2BP2, FRG1, PPP2C…	2397	284	13528	1.609653	3.211391e-02	6.526044e-04	1.393229e-02
no Peak	ER to Golgi vesicle-mediated transport	21	0.062849789	8.028254e-06	SEC23A, RAB2A, TMX1, SEC24B, SEC24A, SEC31A, ATL2, HTT, USE1, COG3, VCP, SEC22A, SEC13, SEC22C, GOSR1, SAR1B, SAR1A, SEC23B, TRAPPC3, ZW10, TRAPPC2	2397	42	13528	2.821861	3.469233e-02	6.920820e-04	1.507080e-02
no Peak	DNA replication	59	0.176577979	1.001120e-05	DBF4, NAP1L1, C16ORF75, TERF2IP, MCM10, PRIM1, IGHMBP2, NT5M, PRIM2, POLG2, MYST2, CDC6, SSBP1, NOL8, LIG1, MCM3, RNASEH2A, RBBP7, RMI1, MCM4, RAD50, MCM5, MCM6, PURA, RAD1, RFC3, RRM1, TOP3A, MED1, ING5, TMX1, NUP98, BLM, WRNIP1, HUS1, TIPIN, POLA1, POLA2, RPA3, RPA1, TFAM, RPA2, POLE3, POLN, TERF2, TERF1, GINS3, GINS4, WRN, CDC25C, BRCA1, POLD3, TNKS1BP1, PCNA, NFIC, CHAF1B, NFIB, DUT, REPIN1	2397	190	13528	1.752524	4.307424e-02	8.463621e-04	1.879289e-02
no Peak	chromatin organization	101	0.302277557	1.141206e-05	HIRA, CBX3, CBX1, CBX8, CBX7, CBX5, EPC1, EPC2, MLL5, TAF5L, H2AFV, EED, SEP15, MYST2, MYST3, RCOR1, RBL1, HMG20A, ARID1B, H2AFJ, CHRAC1, SUZ12, SMARCE1, HUWE1, PRDM6, SMARCA5, SUV420H1, SMARCA4, TADA3, TADA1, SOX6, CDYL2, NPM1, TAF9, BCOR, DNMT3B, YEATS4, EHMT1, CREBBP, WHSC1, UIMC1, CTR9, RNF8, HDAC4, SAP130, DNMT1, H3F3B, CHAF1B, RERE, ENY2, BMI1, RSF1, ARID4A, HP1BP3, EZH2, ARID4B, NAP1L1, RT…	2397	378	13528	1.507978	4.895178e-02	9.465425e-04	2.142230e-02
no Peak	regulation of transcription, DNA-dependent	380	1.137281896	1.206314e-05	HKR1, STAT5B, XRCC6, SNIP1, ZNF57, HIRA, ZNF639, MED22, ZNF253, MED21, ZNF254, ZNF251, CTNNB1, EPC1, ZNF777, APP, SIN3A, ZNF248, ZNF394, PITX1, ZNF43, RREB1, TAF4B, ZHX2, ZNF791, HMG20A, MED13, MED10, MED19, ZNF236, MSX1, RAB18, MED15, MTF1, MED16, MED17, ZNF786, ZNF785, VEGFA, PIAS2, TRAPPC2, TMX1, ZNF614, ZNF611, TADA3, ZNF77, ZSCAN5A, ZNF510, NFKBIA, MYBL1, HEXIM2, DRAP1, LHX1, HEXIM1, HTATSF1…	2397	1773	13528	1.209596	5.167122e-02	9.819994e-04	2.264436e-02
no Peak	intracellular protein transport	100	0.299284710	1.227731e-05	LTBP2, AP4E1, XPO6, AP1G1, TGFB3, MIPEP, STAM, SAR1B, SAR1A, NUPL2, VTI1A, TIMM8A, MAPK1, SEC61B, USO1, SEC61G, PACS1, SNX9, DERL2, SNX6, NAPG, MTX3, STAM2, SNX2, NFKBIA, SNX1, RIMS2, STX12, CSE1L, NPM1, STX16, SEC23IP, TRAM1, STX10, SRP54, HTT, ARFIP1, VCP, TOMM70A, TRPS1, PTTG1IP, PCNA, SEC13, SPTBN1, GOSR1, RERE, COPA, CLTA, SEC24B, SEC24A, MLPH, AP2S1, TIMM17A, HPS4, AP3S1, IMMP2L, PEX1, COPB…	2397	374	13528	1.509016	5.256405e-02	9.812627e-04	2.304635e-02
no Peak	mRNA metabolic process	99	0.296291862	1.320727e-05	RNASEL, EIF2C2, RNMT, RBM5, SNRPD1, SYNCRIP, SNRPD2, SART1, SMNDC1, APP, DNAJB11, LSM5, DHX35, DDX20, TGS1, CCAR1, CLNS1A, SNRPA1, PAN3, SF3B14, ZHX2, HNRNPR, HNRNPU, PCF11, AQR, SERBP1, VEGFA, SNRPB, SLU7, SNRPC, EIF2C3, NHP2L1, PPIL1, DDX46, FRG1, CNOT6L, C19ORF29, HNRNPD, PPIL3, PRPF40A, SPOP, DDX1, YTHDC1, SMG1, CASC3, SNRNP27, CSTF1, WBP4, DGCR14, PARN, PCBP2, DBR1, TSEN15, ZCCHC8, KHDRBS1, …	2397	370	13528	1.510077	5.643117e-02	1.036712e-03	2.479181e-02
no Peak	macromolecular complex subunit organization	170	0.508784006	1.523439e-05	OCLN, XPO6, CAPZA2, IDE, RBM5, LNX2, SNRPD1, SNRPD2, CD2AP, CTNNB1, SMNDC1, TAPBP, IGHMBP2, GTF2E1, H2AFV, APOE, AQP11, SH3BGR, DDX20, TUBG1, TGS1, MTERFD3, INSR, MYST3, SYK, CLNS1A, NUP133, BRAF, MAGI1, PCBD1, TAF4B, FADD, H2AFJ, MED13, IRS1, SPAG9, SMARCE1, PTRF, MED16, MED17, SNRPB, SMARCA5, SLU7, SNRPC, STMN1, AMFR, SEPT7, SEPT9, TRAF2, CAV1, BLM, NAPG, GRB2, CSE1L, NPM1, FBXO5, TAF9, OLFM1, …	2397	710	13528	1.351314	6.480607e-02	1.174772e-03	2.859648e-02
no Peak	regulation of apoptosis	189	0.565648101	1.599471e-05	XRCC5, DLC1, XRCC4, XRCC2, MAEA, CADM1, STAT5B, RBM5, TGFB3, FOXO1, RPS27L, FOXO3, PMAIP1, SGMS1, CIAPIN1, SART1, CRADD, SMNDC1, CTNNBL1, CUL3, MAP3K7, CUL5, APP, APOE, TIA1, ZNF443, DAP, DDX20, CUL1, WWOX, NUDT2, ZC3HC1, PTPRF, ROCK1, BRAF, DFFA, HRK, PIM1, ACTN1, FADD, HBXIP, CSDA, STK3, NME6, MAPK1, MSX1, TIAL1, VEGFA, TNFAIP8, CSTB, MAPK9, UBA52, KALRN, TRAF2, TMX1, GCLC, STK17B, NFKBIA, BCL2…	2397	804	13528	1.326696	6.792807e-02	1.212115e-03	3.002347e-02
no Peak	interphase of mitotic cell cycle	37	0.110735343	2.002657e-05	PPP6C, BLM, E2F6, DBF4, CAMK2G, POLA1, ANAPC10, ITGB1, LATS2, CUL3, ACVR1B, APP, CUL5, KATNA1, BCL2, NPAT, PPP3CB, CAMK2D, TCF3, CUL1, TERF1, NFATC1, KHDRBS1, TAF2, CDC6, PIM1, TPD52L1, CDC25C, FOXN3, RBBP8, GSPT1, CUL4A, MDM2, ID4, ABL1, GADD45A, ACVR1	2397	103	13528	2.027356	8.431031e-02	1.491729e-03	3.759027e-02
no Peak	macromolecular complex assembly	160	0.478855535	2.124447e-05	OCLN, XPO6, CAPZA2, IDE, RBM5, LNX2, SNRPD1, SNRPD2, CD2AP, TAPBP, SMNDC1, CTNNB1, IGHMBP2, GTF2E1, H2AFV, AQP11, APOE, SH3BGR, DDX20, TUBG1, TGS1, INSR, MYST3, SYK, CLNS1A, BRAF, MAGI1, PCBD1, TAF4B, FADD, H2AFJ, MED13, IRS1, SPAG9, PTRF, MED16, MED17, SMARCA5, SNRPB, SLU7, SNRPC, AMFR, SEPT7, SEPT9, TRAF2, CAV1, NAPG, BLM, GRB2, CSE1L, NPM1, FBXO5, TAF9, OLFM1, TAF2, TAF4, SRP54, CREBBP, DDX1, …	2397	665	13528	1.357888	8.920203e-02	1.556024e-03	3.987586e-02
no Peak	apoptosis	147	0.439948523	2.139882e-05	FASTKD3, DLC1, FASTKD2, CADM1, RBM5, RNF216, PMAIP1, SGMS1, FOXO3, CIAPIN1, CRADD, CTNNBL1, SMNDC1, CTNNB1, SHB, APP, GATA6, TIA1, DAP, CUL1, BCL7C, CCAR1, OPA1, ROCK1, FAM82A2, DFFA, HRK, FADD, AHR, STK3, NME6, TNS4, RNF130, TIAL1, TNFAIP8, PDCD6IP, UBA52, KALRN, BLCAP, TRAF2, GGCT, LITAF, STK17B, NFKBIA, ARF6, BCL2L1, DIDO1, SLC11A2, CSE1L, MTCH1, TCTN3, FAIM, HSPE1, DYRK2, FGD3, CKAP2, ABR, TM…	2397	602	13528	1.378118	8.982011e-02	1.541647e-03	4.016553e-02
no Peak	double-strand break repair	26	0.077814024	2.373105e-05	XRCC5, XRCC4, NBN, XRCC2, BLM, XRCC6, HUS1, POLA1, PRKDC, UBE2V2, SETX, RPA1, ERCC4, BRCC3, MSH2, APTX, BRIP1, RAD50, XRCC6BP1, UIMC1, BRCA1, RNF8, VCP, TDP1, BRE, RAD54B	2397	62	13528	2.366722	9.910846e-02	1.681977e-03	4.454219e-02
no Peak	protein modification by small protein conjugation	44	0.131685272	2.442346e-05	ATG10, DZIP3, CDC73, SAE1, NEDD8, UBE2V2, UBE3C, CBX8, SENP7, SUMO3, SUMO1, FBXW7, UBE2D2, WWP2, MAP3K1, RNF11, FBXO4, UBE2D1, FBXW11, RNF14, DDB1, UBE2H, ATG3, TSPAN17, UBE2B, RBBP6, BRCA1, CTR9, RNF8, SUZ12, MIB1, NOSIP, GSPT1, HUWE1, VCP, WDSUB1, FBXL5, MDM2, SIAH1, AMFR, UBB, UBA52, BARD1, RNF41	2397	132	13528	1.881240	1.018478e-01	1.703558e-03	4.584154e-02
no Peak	regulation of cell death	190	0.568640948	2.555324e-05	XRCC5, DLC1, XRCC4, XRCC2, MAEA, CADM1, STAT5B, RBM5, TGFB3, FOXO1, RPS27L, FOXO3, PMAIP1, SGMS1, CIAPIN1, SART1, CRADD, SMNDC1, CTNNBL1, CUL3, MAP3K7, CUL5, APP, APOE, TIA1, ZNF443, DAP, DDX20, CUL1, WWOX, NUDT2, ZC3HC1, PTPRF, ROCK1, BRAF, DFFA, PIM1, HRK, ACTN1, FADD, HBXIP, CSDA, STK3, NME6, MAPK1, MSX1, TIAL1, VEGFA, TNFAIP8, CSTB, MAPK9, UBA52, KALRN, TRAF2, TMX1, GCLC, STK17B, NFKBIA, BCL2…	2397	815	13528	1.315714	1.062995e-01	1.754468e-03	4.796158e-02
no Peak	regulation of programmed cell death	189	0.565648101	2.949653e-05	XRCC5, DLC1, XRCC4, XRCC2, MAEA, CADM1, STAT5B, RBM5, TGFB3, FOXO1, RPS27L, FOXO3, PMAIP1, SGMS1, CIAPIN1, SART1, CRADD, SMNDC1, CTNNBL1, CUL3, MAP3K7, CUL5, APP, APOE, TIA1, ZNF443, DAP, DDX20, CUL1, WWOX, NUDT2, ZC3HC1, PTPRF, ROCK1, BRAF, DFFA, HRK, PIM1, ACTN1, FADD, HBXIP, CSDA, STK3, NME6, MAPK1, MSX1, TIAL1, VEGFA, TNFAIP8, CSTB, MAPK9, UBA52, KALRN, TRAF2, TMX1, GCLC, STK17B, NFKBIA, BCL2…	2397	812	13528	1.313625	1.216654e-01	1.993820e-03	5.536092e-02
no Peak	programmed cell death	148	0.442941370	3.112685e-05	FASTKD3, DLC1, FASTKD2, CADM1, RBM5, RNF216, PMAIP1, SGMS1, FOXO3, CIAPIN1, CRADD, CTNNBL1, SMNDC1, CTNNB1, SHB, APP, GATA6, TIA1, DAP, CUL1, BCL7C, CCAR1, OPA1, ROCK1, FAM82A2, DFFA, HRK, FADD, AHR, STK3, NME6, TNS4, RNF130, TIAL1, TNFAIP8, PDCD6IP, UBA52, KALRN, BLCAP, TRAF2, GGCT, LITAF, STK17B, NFKBIA, ARF6, BCL2L1, DIDO1, SLC11A2, CSE1L, MTCH1, TCTN3, FAIM, HSPE1, DYRK2, FGD3, CKAP2, ABR, TM…	2397	611	13528	1.367055	1.279408e-01	2.072063e-03	5.841996e-02
no Peak	protein complex biogenesis	126	0.377098734	3.153285e-05	OCLN, XPO6, CAPZA2, IDE, LNX2, CD2AP, TAPBP, CTNNB1, IGHMBP2, GTF2E1, AQP11, SH3BGR, TUBG1, INSR, SYK, BRAF, MAGI1, PCBD1, TAF4B, FADD, MED13, IRS1, SPAG9, PTRF, MED16, MED17, SMARCA5, AMFR, SEPT7, SEPT9, TRAF2, CAV1, NAPG, BLM, GRB2, CSE1L, NPM1, FBXO5, TAF9, OLFM1, TAF2, TAF4, SRP54, CREBBP, SMAD4, SMAD3, SKI, MALT1, SMAD2, SMAD1, VCP, HSPD1, CHAF1B, E2F3, RSF1, ATL2, COX10, AP2S1, SKAP2, NDUFA…	2397	505	13528	1.408136	1.294966e-01	2.067765e-03	5.918174e-02
no Peak	protein complex assembly	126	0.377098734	3.153285e-05	OCLN, XPO6, CAPZA2, IDE, LNX2, CD2AP, TAPBP, CTNNB1, IGHMBP2, GTF2E1, AQP11, SH3BGR, TUBG1, INSR, SYK, BRAF, MAGI1, PCBD1, TAF4B, FADD, MED13, IRS1, SPAG9, PTRF, MED16, MED17, SMARCA5, AMFR, SEPT7, SEPT9, TRAF2, CAV1, NAPG, BLM, GRB2, CSE1L, NPM1, FBXO5, TAF9, OLFM1, TAF2, TAF4, SRP54, CREBBP, SMAD4, SMAD3, SKI, MALT1, SMAD2, SMAD1, VCP, HSPD1, CHAF1B, E2F3, RSF1, ATL2, COX10, AP2S1, SKAP2, NDUFA…	2397	505	13528	1.408136	1.294966e-01	2.067765e-03	5.918174e-02
no Peak	positive regulation of cellular protein metabolic process	67	0.200520755	3.747704e-05	DLC1, AURKAIP1, BTRC, PRKAG2, TGFB3, APOE, PSMD2, PSMD3, PSMD4, PSMD5, INSR, SAMD4A, CUL1, EIF2B5, SYK, PRKCA, ANAPC1, ANAPC2, SKP1, RPS4X, MAPK1, PSEN1, PSMA4, MDM2, UBB, ANAPC7, IFT88, EIF5A2, UBA52, ATG10, CAV1, GCLC, BMPR2, PML, KITLG, NFKBIA, ANAPC10, PSMF1, PSMB6, PSMB1, BCL2, PSMB2, PEMT, FBXO5, BCL3, FBXO4, UBE2D1, DNMT3B, NR1H3, BMP4, SMAD7, TGFBR1, SMAD4, NDFIP1, RICTOR, CDC27, BRCA1, P…	2397	233	13528	1.622873	1.519597e-01	2.420993e-03	7.033424e-02
no Peak	proteasomal ubiquitin-dependent protein catabolic process	36	0.107742495	4.046011e-05	RAD23B, DERL2, PPP2R5C, ANAPC10, EDEM3, CD2AP, EDEM1, CUL3, PSMF1, PSMB6, PSMB1, PSMB2, PSMD2, PSMD3, PSMD4, PSMD5, UBE2D1, BUB3, UBXN1, ANAPC1, ANAPC2, TBL1XR1, FOXRED2, CDC27, PSMB9, PSMC6, SEC61B, PSMD12, VCP, PSMC4, PSMA4, AMFR, ANAPC7, UBB, TBL1X, UBA52	2397	102	13528	1.991902	1.630134e-01	2.575622e-03	7.593066e-02
no Peak	proteasomal protein catabolic process	36	0.107742495	4.046011e-05	RAD23B, DERL2, PPP2R5C, ANAPC10, EDEM3, CD2AP, EDEM1, CUL3, PSMF1, PSMB6, PSMB1, PSMB2, PSMD2, PSMD3, PSMD4, PSMD5, UBE2D1, BUB3, UBXN1, ANAPC1, ANAPC2, TBL1XR1, FOXRED2, CDC27, PSMB9, PSMC6, SEC61B, PSMD12, VCP, PSMC4, PSMA4, AMFR, ANAPC7, UBB, TBL1X, UBA52	2397	102	13528	1.991902	1.630134e-01	2.575622e-03	7.593066e-02
no Peak	interphase	37	0.110735343	4.059120e-05	PPP6C, BLM, E2F6, DBF4, CAMK2G, POLA1, ANAPC10, ITGB1, LATS2, CUL3, ACVR1B, APP, CUL5, KATNA1, BCL2, NPAT, PPP3CB, CAMK2D, TCF3, CUL1, TERF1, NFATC1, KHDRBS1, TAF2, CDC6, PIM1, TPD52L1, CDC25C, FOXN3, RBBP8, GSPT1, CUL4A, MDM2, ID4, ABL1, GADD45A, ACVR1	2397	106	13528	1.969978	1.634958e-01	2.547090e-03	7.617658e-02
no Peak	positive regulation of protein metabolic process	69	0.206506450	4.387405e-05	DLC1, AURKAIP1, BTRC, PRKAG2, TGFB3, APOE, PSMD2, PSMD3, PSMD4, PSMD5, INSR, SAMD4A, CUL1, EIF2B5, SYK, PRKCA, ANAPC1, ANAPC2, SKP1, RPS4X, MAPK1, PSEN1, PSMA4, MDM2, UBB, ANAPC7, IFT88, EIF5A2, UBA52, ATG10, CAV1, GCLC, BMPR2, PML, KITLG, NFKBIA, ANAPC10, PSMF1, PSMB6, PSMB1, BCL2, PSMB2, PEMT, FBXO5, BCL3, FBXO4, UBE2D1, DNMT3B, APC, NR1H3, BMP4, SMAD7, TGFBR1, NDFIP1, SMAD4, RICTOR, CDC27, BRC…	2397	243	13528	1.602538	1.754869e-01	2.714089e-03	8.233502e-02
no Peak	Golgi vesicle transport	43	0.128692425	4.603182e-05	PACS1, TMX1, COPA, PLDN, STX8, SEC24B, CLTA, SEC24A, SEC31A, ATL2, NAPG, AP1G1, USE1, CNO, RAB3IP, TAPBP, GBF1, BLOC1S3, COPB1, STX16, AP3B2, SEC22A, SEC22C, EXOC5, SAR1B, SAR1A, STX10, GOLGA3, ZW10, RAB2A, SEC23A, ARL1, HTT, COG3, VCP, ARRB1, SEC13, GOSR1, COPE, TRAPPC3, SEC23B, TRAPPC2, COG2	2397	131	13528	1.852519	1.832748e-01	2.807892e-03	8.638268e-02
no Peak	phosphate metabolic process	220	0.658426361	4.611329e-05	PDP1, MAP3K7, APP, CLK3, COL4A3BP, CLK4, GAB1, SYK, MAP2K5, PTPRJ, PTPRK, PAN3, BCR, TNIK, ROCK1, BRAF, PTPRF, ROCK2, WNK1, PIM1, PTPRS, MARK3, PTPDC1, MAPK1, SPAG9, MAPK6, ATP5C1, MAPK9, MST1R, NEK4, NEK7, NEK2, NEK1, HUS1, DUSP10, STK17B, ADRBK2, DUSP12, DUSP11, EPHB4, SDHAF2, GPD1L, VRK1, GPD2, SMAD7, MAP2K2, TGFBR1, MAP2K4, TAOK3, PTPN14, PTPN13, DUSP22, SMAD2, OXSR1, PTPN12, EPHA2, PPA2, PPA…	2397	973	13528	1.276073	1.835674e-01	2.774376e-03	8.653552e-02
no Peak	phosphorus metabolic process	220	0.658426361	4.611329e-05	PDP1, MAP3K7, APP, CLK3, COL4A3BP, CLK4, GAB1, SYK, MAP2K5, PTPRJ, PTPRK, PAN3, BCR, TNIK, ROCK1, BRAF, PTPRF, ROCK2, WNK1, PIM1, PTPRS, MARK3, PTPDC1, MAPK1, SPAG9, MAPK6, ATP5C1, MAPK9, MST1R, NEK4, NEK7, NEK2, NEK1, HUS1, DUSP10, STK17B, ADRBK2, DUSP12, DUSP11, EPHB4, SDHAF2, GPD1L, VRK1, GPD2, SMAD7, MAP2K2, TGFBR1, MAP2K4, TAOK3, PTPN14, PTPN13, DUSP22, SMAD2, OXSR1, PTPN12, EPHA2, PPA2, PPA…	2397	973	13528	1.276073	1.835674e-01	2.774376e-03	8.653552e-02
no Peak	regulation of cell cycle	88	0.263370544	5.353864e-05	CCNT2, DYNC1LI1, NBN, MAEA, AURKAIP1, COPS5, STAT5B, RPS27L, ZZEF1, PTEN, LATS2, CDC42, TRIAP1, APP, TGFA, RANBP1, FANCG, INSR, MYC, ZW10, DLG1, PTPRK, CDC6, ANAPC2, BRCC3, ROCK2, DDB1, PIM1, NUSAP1, PKIA, FOXN3, GTF2H1, RBBP8, RAD1, PRDM4, TIMELESS, GADD45G, MDM2, FOXC1, RBM38, GADD45A, SMARCA4, BLM, NEK2, HUS1, PML, TIPIN, ANAPC10, ASNS, ITGB1, HEXIM2, C12ORF11, HEXIM1, MDC1, BCL2, NPM1, BUB1, …	2397	331	13528	1.500446	2.098000e-01	3.176959e-03	1.004632e-01
no Peak	DNA damage response, signal transduction	30	0.089785413	5.842308e-05	NBN, BLM, HUS1, PML, TIPIN, RPS27L, TRIAP1, ERCC6, MDC1, HMOX1, BCL3, DYRK2, MSH6, BRCC3, MSH2, AIFM1, BRIP1, MBD4, CEP63, FOXN3, UIMC1, BRCA1, PTPN11, RAD1, UACA, MAPK14, BRE, DGKZ, RBM38, ABL1	2397	80	13528	2.116395	2.265948e-01	3.420167e-03	1.096239e-01
no Peak	posttranscriptional regulation of gene expression	61	0.182563673	7.341009e-05	EIF2C2, CPEB2, IMPACT, HPS4, SYNCRIP, PTEN, APP, TIA1, HRSP12, PUM2, EIF2B3, SAMD4A, EIF2B5, PRKCA, BRF1, CCDC88C, APTX, EIF1B, RPS4X, UBE2B, FLNA, HNRNPU, MAPK1, EIF4G2, SERBP1, NCK1, VEGFA, RBM38, MDM4, EEFSEC, PPP1R15B, EIF5A2, PPP1R15A, EIF2C3, NAPG, PML, PRKDC, GCN1L1, STX12, EIF3H, BCL2, SEPSECS, HNRNPD, BCL3, TNRC6B, TNRC6A, SMAD7, IREB2, DDX1, SMAD3, ELAVL1, SMAD2, SMAD1, CASC3, SELT, EIF…	2397	211	13528	1.631597	2.759316e-01	4.239271e-03	1.377269e-01
no Peak	regulation of ligase activity	30	0.089785413	7.577978e-05	XRCC4, BTRC, ANAPC10, FEM1B, PSMF1, PSMB6, PSMB1, PSMB2, PSMD2, PSMD3, FBXO5, PSMD4, PSMD5, UBE2D1, CUL1, BUB3, ANAPC1, ANAPC2, SMAD7, SKP1, CDC27, PSMB9, PSMC6, PSMD12, PSMC4, PSMA4, ANAPC7, UBB, ZER1, UBA52	2397	81	13528	2.090267	2.834392e-01	4.319115e-03	1.421697e-01
no Peak	negative regulation of RNA metabolic process	94	0.281327627	7.587619e-05	JDP2, RSF1, ARID4A, E2F6, NR6A1, ZNF639, ZNF675, PAX5, CBX3, NFKB1, ZNF202, PAWR, ZNF254, CBX5, CTNNB1, KCNIP3, IGHMBP2, EPC1, SIN3A, HEY1, DDX20, NR2F2, ZNF496, KDM5B, TBL1XR1, ZNF593, GSC, LDB1, ARID5B, GABPA, RBL1, ARID5A, ZHX2, ZNF189, TLE1, CSDA, RBBP7, PKIA, FOXN3, PURA, MXD4, SUZ12, CTNNBIP1, MSX1, NCOA2, SMARCE1, BPTF, ZNF136, MDM2, MDM4, SMARCA4, ZMYND11, HAT1, SOX6, ZNF174, HEXIM2, DRAP…	2397	362	13528	1.465497	2.837429e-01	4.269273e-03	1.423505e-01
no Peak	mRNA processing	85	0.254392003	8.434400e-05	RNASEL, EIF2C2, RNMT, RBM5, SNRPD1, SYNCRIP, SNRPD2, WBP4, DGCR14, SART1, SMNDC1, APP, PCBP2, LSM5, DBR1, DHX35, DDX20, TGS1, TSEN15, ZCCHC8, CCAR1, CLNS1A, KHDRBS1, SRPK2, SNRPA1, SF3B14, SF1, PRPF3, CDC5L, MBNL1, HNRNPR, HNRNPU, TTF2, PCF11, SNRNP48, AQR, ROD1, ESRP1, SNRPB, SLU7, RBM38, SNRPC, CPSF3, THOC2, CPSF2, CPSF1, PRPF38B, PPP4R2, NHP2L1, PPIL1, TRA2A, SF3B5, SF3B3, POLR2A, SF3B2, SF3B1…	2397	321	13528	1.494443	3.099288e-01	4.684695e-03	1.582249e-01
no Peak	DNA damage checkpoint	21	0.062849789	8.832605e-05	NBN, BRCC3, BLM, MSH2, HUS1, TIPIN, PML, BRIP1, RPS27L, CEP63, FOXN3, BRCA1, UIMC1, PTPN11, RAD1, TRIAP1, MDC1, MAPK14, BRE, DGKZ, RBM38	2397	48	13528	2.469128	3.219099e-01	4.844168e-03	1.656892e-01
no Peak	regulation of organelle organization	62	0.185556520	9.209889e-05	DLC1, DYNC1LI1, LIMA1, AURKAIP1, CAPZA2, PAX5, TERF2IP, ZZEF1, CTNNB1, CDC42, CEP250, GSN, TGFA, RANBP1, MYC, INSR, STMN3, ROCK2, NUSAP1, NEBL, TNKS2, ARPC5L, NCK1, MAPRE1, DST, TRIOBP, CAV1, NEK2, PML, ARF6, RDX, ANAPC10, ARPC5, TPM1, CAPZB, PFN2, ARPC3, MAP3K1, NPM1, BUB1, SKA3, SKA1, ERCC4, DNMT3B, TERF2, TERF1, APC, DLGAP5, PIF1, SPTBN4, SMAD3, RICTOR, CDC25C, BRCA1, PLK4, GOLPH3, KIF20B, CEN…	2397	217	13528	1.612492	3.330696e-01	4.988376e-03	1.727608e-01
no Peak	regulation of ubiquitin-protein ligase activity	29	0.086792566	9.493213e-05	BTRC, ANAPC10, FEM1B, PSMF1, PSMB6, PSMB1, PSMB2, PSMD2, PSMD3, FBXO5, PSMD4, PSMD5, UBE2D1, CUL1, BUB3, ANAPC1, ANAPC2, SMAD7, SKP1, CDC27, PSMB9, PSMC6, PSMD12, PSMC4, PSMA4, ANAPC7, UBB, ZER1, UBA52	2397	78	13528	2.098307	3.413292e-01	5.078904e-03	1.780710e-01
no Peak	telomere maintenance	15	0.044892706	9.536233e-05	XRCC5, NBN, BLM, XRCC6, PRKDC, WRN, TERF2IP, RAD50, TNKS1BP1, HSPA1L, FBXO4, PARP1, ERCC4, TERF2, TERF1	2397	28	13528	3.023422	3.425743e-01	5.040549e-03	1.788772e-01
no Peak	cell death	167	0.499805465	1.014959e-04	FASTKD3, DLC1, MICA, FASTKD2, CADM1, RBM5, RNF216, PMAIP1, SGMS1, FOXO3, CIAPIN1, CRADD, SETX, CTNNB1, SMNDC1, CTNNBL1, IGHMBP2, SHB, APP, GATA6, TIA1, DAP, CUL1, BCL7C, CCAR1, OPA1, ROCK1, SLC33A1, FAM82A2, DFFA, HRK, FADD, AHR, STK3, NME6, TNS4, RNF130, TIAL1, TNFAIP8, PDCD6IP, UBA52, KALRN, BLCAP, TRAF2, GGCT, LITAF, STK17B, NFKBIA, ARF6, BCL2L1, DIDO1, SLC11A2, CSE1L, MTCH1, TCTN3, FAIM, HSPE…	2397	719	13528	1.310850	3.600733e-01	5.300210e-03	1.903720e-01
no Peak	DNA integrity checkpoint	22	0.065842636	1.020528e-04	CDC6, NBN, BRCC3, BLM, MSH2, HUS1, TIPIN, PML, BRIP1, RPS27L, CEP63, FOXN3, BRCA1, UIMC1, PTPN11, RAD1, TRIAP1, MDC1, MAPK14, BRE, DGKZ, RBM38	2397	52	13528	2.387728	3.616388e-01	5.266683e-03	1.914156e-01
no Peak	death	168	0.502798312	1.032634e-04	FASTKD3, DLC1, MICA, FASTKD2, CADM1, RBM5, RNF216, PMAIP1, SGMS1, FOXO3, CIAPIN1, CRADD, SETX, CTNNB1, SMNDC1, CTNNBL1, IGHMBP2, SHB, APP, GATA6, TIA1, DAP, CUL1, BCL7C, CCAR1, OPA1, ROCK1, SLC33A1, FAM82A2, DFFA, HRK, FADD, AHR, STK3, NME6, TNS4, RNF130, TIAL1, TNFAIP8, PDCD6IP, UBA52, KALRN, BLCAP, TRAF2, GGCT, LITAF, STK17B, NFKBIA, ARF6, BCL2L1, DIDO1, SLC11A2, CSE1L, MTCH1, TCTN3, FAIM, HSPE…	2397	724	13528	1.309593	3.650291e-01	5.267196e-03	1.936843e-01
no Peak	negative regulation of transcription, DNA-dependent	92	0.275341933	1.095558e-04	JDP2, RSF1, ARID4A, E2F6, NR6A1, ZNF639, ZNF675, PAX5, CBX3, NFKB1, ZNF202, PAWR, ZNF254, CBX5, CTNNB1, KCNIP3, IGHMBP2, EPC1, SIN3A, HEY1, DDX20, NR2F2, ZNF496, KDM5B, TBL1XR1, ZNF593, GSC, LDB1, ARID5B, GABPA, RBL1, ARID5A, ZHX2, ZNF189, TLE1, CSDA, RBBP7, PKIA, FOXN3, PURA, MXD4, SUZ12, CTNNBIP1, MSX1, NCOA2, SMARCE1, BPTF, ZNF136, MDM2, MDM4, SMARCA4, ZMYND11, HAT1, SOX6, ZNF174, HEXIM2, DRAP…	2397	356	13528	1.458490	3.823619e-01	5.523227e-03	2.054748e-01
no Peak	protein ubiquitination	39	0.116721037	1.140423e-04	DZIP3, CDC73, SAE1, UBE2V2, UBE3C, CBX8, FBXW7, UBE2D2, WWP2, MAP3K1, RNF11, FBXO4, UBE2D1, FBXW11, RNF14, DDB1, UBE2H, ATG3, TSPAN17, UBE2B, RBBP6, BRCA1, CTR9, RNF8, SUZ12, MIB1, NOSIP, GSPT1, HUWE1, VCP, WDSUB1, FBXL5, MDM2, SIAH1, AMFR, UBB, UBA52, BARD1, RNF41	2397	119	13528	1.849623	3.944308e-01	5.683633e-03	2.138809e-01
no Peak	cell cycle checkpoint	32	0.095771107	1.270979e-04	NBN, BLM, HUS1, PML, TIPIN, RPS27L, TRIAP1, MDC1, BUB1, FANCG, ERCC3, BUB3, ZW10, DLG1, APC, TERF1, CDC6, BRCC3, MSH2, DDB1, BRIP1, CEP63, BRCA1, FOXN3, UIMC1, PTPN11, RBBP8, RAD1, MAPK14, BRE, DGKZ, RBM38	2397	91	13528	1.984605	4.282263e-01	6.261350e-03	2.383384e-01
no Peak	positive regulation of transcription	135	0.404034358	1.276086e-04	STAT5B, XRCC6, TGFB3, FOXO1, FOXO3, CNOT7, MED21, CITED4, CTNNB1, EPC1, GATA2, APP, MLL5, GATA6, MYST3, PCBD1, ARID1B, MED13, SIX4, TRERF1, AHR, MAPK1, HIF1A, MTF1, MED17, VEGFA, PIAS2, NFE2L2, UBA52, SMARCA4, TMX1, CNBP, BLM, ONECUT2, NFKBIA, SOX6, TEAD4, TAF9, RUNX1, RUNX2, TCF3, RNF14, NR1H3, KLF5, TAF2, BMP4, KLF6, YEATS4, KLF7, TAF8, MAML1, TGFBR1, CREBBP, SMAD4, NR4A2, TEAD1, SMAD3, SMAD2, …	2397	564	13528	1.350891	4.295093e-01	6.216800e-03	2.392951e-01
no Peak	ribonucleoprotein complex biogenesis	53	0.158620896	1.394157e-04	NAF1, RNASEL, SURF6, UTP18, RBM5, UTP15, SNRPD1, SNRPD2, SMNDC1, EBNA1BP2, WDR36, RRP1B, DDX20, TGS1, CLNS1A, SRPK2, EXOSC6, EXOSC2, SF1, MBNL1, MRTO4, SNRPB, SLU7, SNRPC, C1D, SDAD1, NHP2L1, NUFIP1, ERI1, PIN4, BMS1, EXOSC10, UTP11L, FRG1, NPM1, USP39, AATF, RSL24D1, GEMIN6, RPS24, UTP23, MPHOSPH10, DDX1, RPS6, SF3A1, NOP10, FBL, RPS7, PHAX, NOLC1, NOP58, PES1, DDX51	2397	180	13528	1.661762	4.583814e-01	6.715735e-03	2.614087e-01
no Peak	positive regulation of gene expression	138	0.413012899	1.513101e-04	STAT5B, XRCC6, TGFB3, FOXO1, FOXO3, CNOT7, MED21, CITED4, CTNNB1, EPC1, GATA2, APP, MLL5, GATA6, MYST3, PCBD1, ARID1B, MED13, SIX4, TRERF1, AHR, MAPK1, HIF1A, MTF1, MED17, VEGFA, MAPK9, PIAS2, NFE2L2, UBA52, SMARCA4, TMX1, CNBP, BLM, ONECUT2, NFKBIA, SOX6, TEAD4, TAF9, RUNX1, RUNX2, TCF3, DNMT3B, RNF14, NR1H3, KLF5, TAF2, BMP4, KLF6, YEATS4, KLF7, TAF8, TGFBR1, MAML1, CREBBP, SMAD4, NR4A2, TEAD1,…	2397	581	13528	1.340505	4.859899e-01	7.207728e-03	2.836811e-01
no Peak	regulation of cellular protein metabolic process	116	0.347170263	1.519491e-04	DLC1, EIF2C2, AURKAIP1, IMPACT, BTRC, IDE, TGFB3, PRKAR2B, APP, APOE, TIA1, HRSP12, GAB1, RAPGEF3, PUM2, INSR, EIF2B3, SAMD4A, CUL1, EIF2B5, SYK, ANAPC1, ANAPC2, SKP1, MAPK1, PSMA4, ANAPC7, EEFSEC, EIF2C3, UBA52, CAV1, GCLC, BMPR2, NFKBIA, ANAPC10, PSMB6, PSMB1, EIF3H, ITGAV, PSMB2, PEMT, FBXO5, FBXO4, TAF9, UBE2D1, DNMT3B, NR1H3, BMP4, SMAD7, SMAD6, TGFBR1, IREB2, NDFIP1, SMAD4, DDX1, CASC3, CDC…	2397	474	13528	1.381164	4.874325e-01	7.160509e-03	2.848774e-01
no Peak	telomere organization	15	0.044892706	1.544395e-04	XRCC5, NBN, BLM, XRCC6, PRKDC, WRN, TERF2IP, RAD50, TNKS1BP1, HSPA1L, FBXO4, PARP1, ERCC4, TERF2, TERF1	2397	29	13528	2.919166	4.930167e-01	7.200306e-03	2.895400e-01
no Peak	cell division	78	0.233442073	1.782861e-04	CCNT2, MAEA, PRC1, PTTG1, CD2AP, LATS2, FAM83D, CDC42, ATAD3B, VPS4B, NUP37, ASPM, ZW10, ANAPC1, CDC6, ANAPC2, KIF11, ZC3HC1, ROCK1, ROCK2, CEP110, LIG1, SGOL1, NUSAP1, MYH9, MCM5, NCAPD2, ARL3, DCLRE1A, TIMELESS, NSL1, MAPRE1, HAUS8, ANAPC7, PDCD6IP, NEK4, SEPT7, MAPRE3, SEPT9, BBS4, NEK2, NEK1, USP9X, HAUS2, HAUS1, CETN3, TIPIN, NEDD9, ANAPC10, LLGL2, SPC24, SPC25, NCAPH, NCAPG2, KATNA1, BUB1, …	2397	295	13528	1.492238	5.435025e-01	8.220468e-03	3.341763e-01
no Peak	positive regulation of nucleobase, nucleoside, nucleotide and nucleic acid metabolic process	146	0.436955676	2.039977e-04	STAT5B, XRCC6, TGFB3, FOXO1, FOXO3, CNOT7, MED21, CITED4, CTNNB1, EPC1, GATA2, APP, MLL5, GATA6, APOE, INSR, MYST3, PCBD1, ARID1B, SIX4, MED13, TRERF1, AHR, TNKS2, MAPK1, HIF1A, MTF1, MED17, VEGFA, PIAS2, NFE2L2, UBA52, SMARCA4, TMX1, CNBP, BLM, ONECUT2, NFKBIA, SOX6, TEAD4, TAF9, RUNX1, RUNX2, TCF3, RNF14, NR1H3, KLF5, TAF2, BMP4, KLF6, YEATS4, KLF7, TAF8, TGFBR1, MAML1, CREBBP, SMAD4, NR4A2, TE…	2397	624	13528	1.320486	5.923202e-01	9.303053e-03	3.822824e-01
no Peak	tRNA metabolic process	38	0.113728190	2.110432e-04	PUS1, FARS2, RG9MTD1, WARS2, PUS7, KARS, DTD1, ADAT1, PUS7L, WARS, PARS2, NARS2, QTRTD1, TRMT5, POLG2, DUS1L, TSEN15, TSEN34, RPP25, MOCS3, CARS, TRMU, AIMP1, LCMT2, GARS, AARSD1, LARS2, FBL, TARS, TRMT11, RARS, TRMT12, POP1, WDR4, TRUB1, TRUB2, DUS2L, RPP40	2397	118	13528	1.817470	6.047615e-01	9.524106e-03	3.954606e-01
no Peak	ncRNA metabolic process	63	0.188549367	2.902419e-04	NAF1, RNASEL, UTP18, UTP15, RG9MTD1, PUS7L, WARS, WDR36, RRP1B, NARS2, TRMT5, POLG2, DUS1L, TSEN15, RPP25, CARS, EXOSC6, EXOSC2, TARS, TRMT11, RARS, TRMT12, TRUB1, TRUB2, DUS2L, C1D, PUS1, FARS2, ERI1, WARS2, PIN4, PUS7, KARS, DTD1, EXOSC10, ADAT1, UTP11L, PARS2, FRG1, QTRTD1, RPS24, TSEN34, UTP23, MOCS3, TRMU, AIMP1, LCMT2, MPHOSPH10, GARS, LARS2, AARSD1, INTS10, RPS6, NOP10, FBL, RPS7, NOLC1, P…	2397	230	13528	1.545889	7.210351e-01	1.294275e-02	5.434838e-01
no Peak	positive regulation of nitrogen compound metabolic process	149	0.445934217	3.021841e-04	XRCC6, STAT5B, TGFB3, FOXO1, FOXO3, CNOT7, MED21, CITED4, CTNNB1, EPC1, GATA2, APP, MLL5, GATA6, APOE, INSR, MYST3, PCBD1, ARID1B, SIX4, MED13, TRERF1, AHR, TNKS2, MAPK1, HIF1A, MTF1, MED17, VEGFA, PIAS2, NFE2L2, UBA52, SMARCA4, TMX1, CNBP, BLM, ONECUT2, NFKBIA, SOX6, TEAD4, TAF9, RUNX1, RUNX2, TCF3, RNF14, NR1H3, KLF5, TAF2, BMP4, KLF6, YEATS4, KLF7, TAF8, TGFBR1, MAML1, CREBBP, SMAD4, NR4A2, TE…	2397	644	13528	1.305768	7.353128e-01	1.333660e-02	5.657857e-01
no Peak	regulation of ubiquitin-protein ligase activity during mitotic cell cycle	26	0.077814024	3.116020e-04	BTRC, ANAPC10, PSMF1, PSMB6, PSMB1, PSMB2, PSMD2, FBXO5, PSMD3, PSMD4, PSMD5, UBE2D1, CUL1, BUB3, ANAPC1, ANAPC2, SKP1, CDC27, PSMB9, PSMC6, PSMD12, PSMC4, PSMA4, ANAPC7, UBB, UBA52	2397	71	13528	2.066715	7.460555e-01	1.361289e-02	5.833703e-01
no Peak	protein localization in organelle	44	0.131685272	3.216383e-04	PACS1, BBS4, NUP98, XPO6, MTX3, TIMM17A, PML, TGFB3, NFKBIA, MIPEP, POLA2, RAB3IP, IMMP2L, CSE1L, PPP3CB, BCL3, BCL6, TNPO1, DNAJC19, RBM22, C6ORF168, SRP54, HTT, IPO9, TOPORS, TIMM8A, COG3, MAPK1, BBS2, SEC61B, RPL23, TOMM70A, IPO7, TRPS1, NUP205, IPO5, C3ORF31, PTTG1IP, NOP58, SPTBN1, JAK2, KPNA4, SEC61G, RERE	2397	146	13528	1.700848	7.570240e-01	1.391020e-02	6.021061e-01
no Peak	regulation of protein ubiquitination	33	0.098763954	3.666946e-04	GCLC, BTRC, ANAPC10, FEM1B, PSMF1, PSMB6, PSMB1, PSMB2, PSMD2, PSMD3, FBXO5, PSMD4, FBXO4, PSMD5, UBE2D1, CUL1, BUB3, ANAPC1, ANAPC2, SMAD7, NDFIP1, SKP1, CDC27, BRCA1, PSMB9, PSMC6, PSMD12, PSMC4, PSMA4, ANAPC7, UBB, ZER1, UBA52	2397	100	13528	1.862428	8.007148e-01	1.568952e-02	6.861768e-01
no Peak	ncRNA processing	53	0.158620896	3.897733e-04	NAF1, RNASEL, EIF2C2, UTP18, UTP15, RG9MTD1, PUS7L, WDR36, RRP1B, TRMT5, DUS1L, TSEN15, RPP25, EXOSC6, EXOSC2, TRMT11, TRMT12, TRUB1, TRUB2, DUS2L, C1D, PUS1, FARS2, ERI1, PIN4, PUS7, EXOSC10, ADAT1, UTP11L, FRG1, QTRTD1, TSEN34, RPS24, UTP23, MOCS3, TRMU, LCMT2, MPHOSPH10, SMAD3, SMAD2, SMAD1, INTS10, RPS6, NOP10, FBL, RPS7, NOLC1, POP1, WDR4, NOP58, PES1, RPP40, DDX51	2397	187	13528	1.599557	8.199565e-01	1.650840e-02	7.292133e-01
no Peak	positive regulation of ubiquitin-protein ligase activity during mitotic cell cycle	25	0.074821177	3.918170e-04	BTRC, ANAPC10, PSMF1, PSMB6, PSMB1, PSMB2, PSMD2, FBXO5, PSMD3, PSMD4, PSMD5, UBE2D1, CUL1, ANAPC1, ANAPC2, SKP1, CDC27, PSMB9, PSMC6, PSMD12, PSMC4, PSMA4, ANAPC7, UBB, UBA52	2397	68	13528	2.074898	8.215682e-01	1.643601e-02	7.330235e-01
no Peak	positive regulation of protein ubiquitination	29	0.086792566	3.975863e-04	BTRC, ANAPC10, PSMF1, PSMB6, PSMB1, PSMB2, PSMD2, FBXO5, PSMD3, FBXO4, PSMD4, PSMD5, UBE2D1, CUL1, ANAPC1, ANAPC2, SMAD7, NDFIP1, SKP1, CDC27, BRCA1, PSMB9, PSMC6, PSMD12, PSMC4, PSMA4, ANAPC7, UBB, UBA52	2397	84	13528	1.948428	8.260404e-01	1.651855e-02	7.437789e-01
no Peak	regulation of microtubule-based process	20	0.059856942	4.013503e-04	BBS4, DYNC1LI1, CAV1, ROCK2, BRCA1, CTNNB1, TACC2, BBS2, PLK4, CEP250, NPM1, MKKS, MAP4, SKA3, RANBP1, MAPRE1, SKA1, DST, APC, TERF1	2397	49	13528	2.303560	8.288976e-01	1.651766e-02	7.507952e-01
no Peak	chordate embryonic development	84	0.251399156	4.169614e-04	DLC1, GNA13, XRCC4, NBN, XRCC2, NDST1, GNA12, TGFB3, MED21, CUL3, MAP3K7, GATA2, ACVR1B, OSR2, GATA6, COL4A3BP, MKL2, FLVCR1, GSC, GABPA, DLL1, SIX4, MBNL1, MYH9, CSDA, RBBP8, ASCL2, MIB1, MSX1, HIF1A, PSEN1, FOXC1, KIAA1217, COL1A1, IFT88, MED1, SMARCA4, ACVR1, TAPT1, ZFAND5, BBS4, SHROOM3, FUT8, ELL, PRKDC, EGLN1, KEAP1, CDH1, BCL2L1, TPM1, ITGB1, RPA1, SLC30A1, TEAD4, DAD1, NKX3-1, TERF2, BMP4…	2397	331	13528	1.432243	8.402554e-01	1.699577e-02	7.798905e-01
no Peak	covalent chromatin modification	39	0.116721037	4.181238e-04	ING5, ENY2, SUPT3H, ING3, TADA3, EZH2, HAT1, CDC73, TADA1, CBX8, EPC1, TAF5L, MLL5, RTF1, TAF9, KDM3A, MYST2, DNMT3B, MYST3, BRD8, YEATS4, CSRP2BP, EHMT1, BRCC3, CREBBP, UBE2B, UIMC1, CTR9, RPS6KA5, RNF8, SUZ12, HDAC4, PHF17, HUWE1, SAP130, WHSC1L1, PHF15, SUV420H1, SMARCA4	2397	126	13528	1.746866	8.410702e-01	1.688629e-02	7.820564e-01
no Peak	positive regulation of macromolecule biosynthetic process	150	0.448927064	4.327096e-04	XRCC6, STAT5B, TGFB3, FOXO1, FOXO3, CNOT7, MED21, CITED4, CTNNB1, EPC1, GATA2, APP, MLL5, GATA6, INSR, SAMD4A, MYST3, EIF2B5, SYK, PCBD1, ARID1B, SIX4, MED13, IRS1, TRERF1, AHR, TNKS2, MAPK1, HIF1A, MTF1, MED17, VEGFA, PIAS2, NFE2L2, UBA52, SMARCA4, TMX1, CNBP, BLM, ONECUT2, NFKBIA, SOX6, TEAD4, TAF9, DYRK2, RUNX1, RUNX2, TCF3, RNF14, NR1H3, KLF5, TAF2, BMP4, KLF6, YEATS4, KLF7, TAF8, TGFBR1, MAM…	2397	654	13528	1.294431	8.509493e-01	1.731142e-02	8.092329e-01
no Peak	chromosome segregation	28	0.083799719	5.008754e-04	RAD51C, CCDC99, NEK2, USP9X, PTTG1, SPC25, NCAPH, HJURP, SKA3, NUP37, SKA1, BUB3, ZW10, DLGAP5, SGOL1, KIF18A, NUSAP1, NDC80, PMF1, MIS12, SMC3, BRCA1, CENPH, NCAPD2, PSEN1, RIOK3, NSL1, ARL8B	2397	81	13528	1.950916	8.895732e-01	1.983164e-02	9.361468e-01
no Peak	positive regulation of ligase activity	26	0.077814024	5.049768e-04	XRCC4, BTRC, ANAPC10, PSMF1, PSMB6, PSMB1, PSMB2, PSMD2, FBXO5, PSMD3, PSMD4, PSMD5, UBE2D1, CUL1, ANAPC1, ANAPC2, SKP1, CDC27, PSMB9, PSMC6, PSMD12, PSMC4, PSMA4, ANAPC7, UBB, UBA52	2397	73	13528	2.010093	8.915481e-01	1.981412e-02	9.437779e-01
no Peak	RNA biosynthetic process	76	0.227456379	5.592791e-04	TAF1B, CCNT2, E2F3, RSF1, COPS5, ARID4A, CRCP, PAX5, NFKB1, PTTG1, TMF1, PRIM1, GTF2E1, TAF5L, PRIM2, RTF1, GTF2A2, KDM5A, MTERFD3, MYC, BRF1, MTERF, RREB1, TAF4B, GABPA, GTF2H3, MED13, GTF2B, AHR, TTF2, ELL2, GTF2H1, HIF1A, PTRF, PRDM4, MED16, GTF2I, MED17, ASH1L, SMARCA5, NFE2L1, NFE2L2, MED1, SUPT3H, CCRN4L, ELL, BMPR2, NR3C1, POLR2A, TFAM, ERCC6, GTF3C6, TCEA1, TAF9, HSF2BP, GTF3C2, ERCC3, TR…	2397	296	13528	1.449064	9.145990e-01	2.172830e-02	1.044763e+00
no Peak	embryonic development ending in birth or egg hatching	84	0.251399156	5.632313e-04	DLC1, GNA13, XRCC4, NBN, XRCC2, NDST1, GNA12, TGFB3, MED21, CUL3, MAP3K7, GATA2, ACVR1B, OSR2, GATA6, COL4A3BP, MKL2, FLVCR1, GSC, GABPA, DLL1, SIX4, MBNL1, MYH9, CSDA, RBBP8, ASCL2, MIB1, MSX1, HIF1A, PSEN1, FOXC1, KIAA1217, COL1A1, IFT88, MED1, SMARCA4, ACVR1, TAPT1, ZFAND5, BBS4, SHROOM3, FUT8, ELL, PRKDC, EGLN1, KEAP1, CDH1, BCL2L1, TPM1, ITGB1, RPA1, SLC30A1, TEAD4, DAD1, NKX3-1, TERF2, BMP4…	2397	334	13528	1.419379	9.160714e-01	2.168868e-02	1.052109e+00
no Peak	positive regulation of ubiquitin-protein ligase activity	25	0.074821177	6.364353e-04	BTRC, ANAPC10, PSMF1, PSMB6, PSMB1, PSMB2, PSMD2, FBXO5, PSMD3, PSMD4, PSMD5, UBE2D1, CUL1, ANAPC1, ANAPC2, SKP1, CDC27, PSMB9, PSMC6, PSMD12, PSMC4, PSMA4, ANAPC7, UBB, UBA52	2397	70	13528	2.015615	9.391859e-01	2.426166e-02	1.188081e+00
no Peak	negative regulation of cellular component organization	42	0.125699578	6.825239e-04	DLC1, TRIOBP, LIMA1, NRP1, AURKAIP1, CAPZA2, PAX5, ARF6, RDX, TERF2IP, PTEN, CAPZB, TTC3, CDC42, PACSIN2, GSN, MAP3K1, NPM1, BUB1, ERCC4, DNMT3B, TERF2, TERF1, NR1H3, APC, ARHGEF1, PTPRF, SMAD7, SMAD6, SPTBN4, RTN4R, CST3, BRCA1, RNF6, YWHAH, PSEN1, ULK1, SPTBN1, DNMT1, MAP4, MAPRE1, ARAP1	2397	142	13528	1.669270	9.503504e-01	2.577305e-02	1.273597e+00
no Peak	positive regulation of protein modification process	52	0.155628049	7.194966e-04	DLC1, BTRC, PRKAG2, TGFB3, PSMD2, PSMD3, PSMD4, PSMD5, INSR, CUL1, SYK, PRKCA, ANAPC1, ANAPC2, SKP1, PSEN1, PSMA4, ANAPC7, UBB, UBA52, ATG10, CAV1, BMPR2, PML, KITLG, ANAPC10, PSMF1, PSMB6, PSMB1, BCL2, PSMB2, FBXO5, FBXO4, UBE2D1, DNMT3B, BMP4, SMAD7, TGFBR1, SMAD4, NDFIP1, RICTOR, CDC27, BRCA1, PSMB9, HDAC4, PSMC6, PSMD12, PSMC4, DNMT1, JAK2, BMP7, BMPR1A	2397	187	13528	1.569377	9.578063e-01	2.691969e-02	1.342148e+00
no Peak	formation of primary germ layer	17	0.050878401	7.597771e-04	BMP4, HTT, BMPR2, SMAD3, SMAD2, SMAD1, SLIT2, CTNNB1, WNT3, LHX1, FOXC1, MESP1, BMP7, EXT2, KLF4, BMPR1A, ACVR1	2397	40	13528	2.398582	9.646611e-01	2.816640e-02	1.416781e+00
no Peak	nucleocytoplasmic transport	45	0.134678119	7.634022e-04	NXT1, NUP98, XPO6, NUP160, AGFG1, PML, TGFB3, NFKBIA, POLA2, CSE1L, NPM1, PPP3CB, ANP32A, LSG1, BCL3, BCL6, MLXIP, TNPO1, HSPA9, RBM22, XPOT, NUP133, HTT, SMG1, MALT1, IPO9, NXF1, NUPL2, ATXN1, MAPK1, PHAX, SEC61B, RPL23, IPO7, TRPS1, NUP205, IPO5, PTTG1IP, NOP58, SPTBN1, JAK2, THOC5, KPNA4, THOC2, RERE	2397	156	13528	1.627997	9.652204e-01	2.806249e-02	1.423495e+00
no Peak	protein targeting	58	0.173585132	7.769843e-04	LTBP2, XPO6, MLPH, TIMM17A, HPS4, TGFB3, MIPEP, IMMP2L, PEX1, DNAJC19, AP3B1, PRKCI, IPO9, NUPL2, TIMM8A, MAPK1, SEC61B, IPO7, NUP205, C3ORF31, IPO5, KPNA4, SEC61G, NXT1, PACS1, NUP98, MTX3, PML, NFKBIA, POLA2, SEC62, SEC63, NAGPA, CSE1L, PPP3CB, BCL3, PEX14, BCL6, PEX13, TRAM1, TNPO1, HSPA9, RBM22, C6ORF168, SRP54, HTT, YWHAE, YWHAG, RPL23, ERBB2IP, TOMM70A, TRPS1, PTTG1IP, YWHAQ, NOP58, SPTBN1,…	2397	215	13528	1.522492	9.672386e-01	2.831824e-02	1.448646e+00
no Peak	negative regulation of ligase activity	24	0.071828330	8.025292e-04	ANAPC1, ANAPC2, SMAD7, ANAPC10, CDC27, PSMB9, PSMF1, PSMC6, PSMB6, PSMB1, PSMD12, PSMC4, PSMA4, PSMB2, PSMD2, PSMD3, FBXO5, PSMD4, UBB, PSMD5, ANAPC7, UBE2D1, UBA52, BUB3	2397	67	13528	2.021632	9.707226e-01	2.899582e-02	1.495935e+00
no Peak	negative regulation of ubiquitin-protein ligase activity	24	0.071828330	8.025292e-04	ANAPC1, ANAPC2, SMAD7, ANAPC10, CDC27, PSMB9, PSMF1, PSMC6, PSMB6, PSMB1, PSMD12, PSMC4, PSMA4, PSMB2, PSMD2, PSMD3, FBXO5, PSMD4, UBB, PSMD5, ANAPC7, UBE2D1, UBA52, BUB3	2397	67	13528	2.021632	9.707226e-01	2.899582e-02	1.495935e+00
no Peak	forebrain development	44	0.131685272	8.145673e-04	DLC1, BBS4, NDST1, CDH1, HPRT1, APLP2, CTNNB1, GATA2, APP, SLC1A2, DAB1, LHX1, MKKS, PEX13, NR2F2, FRS2, PITX1, ASPM, BMP4, GSC, TBX3, HTT, YWHAE, TACC2, NUMBL, FOXP2, ATRX, ATP7A, NOTCH3, DLX2, BBS2, DLX1, NOTCH1, MSX1, DKK1, PSEN1, GNAQ, LRP8, ID4, IFT88, TBX19, NFIB, SMARCA4, MYH10	2397	152	13528	1.633709	9.722335e-01	2.918488e-02	1.518212e+00
no Peak	histone modification	37	0.110735343	9.130266e-04	ING5, ENY2, SUPT3H, ING3, TADA3, EZH2, HAT1, CDC73, TADA1, CBX8, EPC1, TAF5L, MLL5, RTF1, TAF9, KDM3A, MYST2, MYST3, BRD8, YEATS4, CSRP2BP, EHMT1, BRCC3, CREBBP, UBE2B, UIMC1, CTR9, RPS6KA5, RNF8, SUZ12, HDAC4, PHF17, SAP130, HUWE1, WHSC1L1, PHF15, SUV420H1	2397	122	13528	1.711620	9.819989e-01	3.239264e-02	1.700237e+00
no Peak	regulation of glycoprotein biosynthetic process	8	0.023942777	9.178589e-04	SOAT1, BACE2, BCL2, HBEGF, AATF, PAWR, INSR, CTNNB1	2397	11	13528	4.104525	9.823778e-01	3.230093e-02	1.709163e+00
no Peak	protein import	39	0.116721037	9.556176e-04	NUP98, XPO6, MTX3, TIMM17A, PML, TGFB3, NFKBIA, MIPEP, POLA2, IMMP2L, CSE1L, PEX1, PPP3CB, PEX14, BCL3, PEX13, BCL6, TNPO1, DNAJC19, RBM22, C6ORF168, HTT, IPO9, TIMM8A, MAPK1, SEC61B, RPL23, TOMM70A, IPO7, TRPS1, NUP205, IPO5, C3ORF31, PTTG1IP, NOP58, SPTBN1, JAK2, KPNA4, RERE	2397	131	13528	1.680192	9.850765e-01	3.334131e-02	1.778878e+00
no Peak	G1/S transition of mitotic cell cycle	21	0.062849789	9.827962e-04	PPP6C, E2F6, DBF4, CAMK2G, PIM1, ITGB1, LATS2, RBBP8, CUL3, ACVR1B, CUL5, CUL4A, GSPT1, BCL2, NPAT, PPP3CB, CAMK2D, ID4, CUL1, NFATC1, ACVR1	2397	56	13528	2.116395	9.867593e-01	3.400411e-02	1.829030e+00
no Peak	transcription, DNA-dependent	74	0.221470685	9.834687e-04	TAF1B, CCNT2, E2F3, RSF1, COPS5, ARID4A, CRCP, PAX5, NFKB1, PTTG1, TMF1, GTF2E1, TAF5L, RTF1, GTF2A2, KDM5A, MTERFD3, MYC, BRF1, MTERF, RREB1, TAF4B, GABPA, GTF2H3, MED13, GTF2B, AHR, TTF2, ELL2, GTF2H1, HIF1A, PTRF, PRDM4, MED16, GTF2I, MED17, ASH1L, SMARCA5, NFE2L1, NFE2L2, MED1, SUPT3H, CCRN4L, ELL, BMPR2, NR3C1, POLR2A, TFAM, ERCC6, GTF3C6, TCEA1, TAF9, HSF2BP, GTF3C2, ERCC3, TRIP11, GTF3C4, …	2397	292	13528	1.430258	9.867985e-01	3.376155e-02	1.830271e+00
no Peak	nuclear transport	45	0.134678119	1.016936e-03	NXT1, NUP98, XPO6, NUP160, AGFG1, PML, TGFB3, NFKBIA, POLA2, CSE1L, NPM1, PPP3CB, ANP32A, LSG1, BCL3, BCL6, MLXIP, TNPO1, HSPA9, RBM22, XPOT, NUP133, HTT, SMG1, MALT1, IPO9, NXF1, NUPL2, ATXN1, MAPK1, PHAX, SEC61B, RPL23, IPO7, TRPS1, NUP205, IPO5, PTTG1IP, NOP58, SPTBN1, JAK2, THOC5, KPNA4, THOC2, RERE	2397	158	13528	1.607389	9.886070e-01	3.462082e-02	1.891993e+00
no Peak	phosphorylation	176	0.526741089	1.120887e-03	RNASEL, STK38, TBK1, NDUFAB1, TGFB3, DSTYK, MAP3K7, APP, CSNK2A1, CLK3, COL4A3BP, AAK1, CLK4, GAB1, STK39, FRS2, INSR, MAP2K5, SYK, TWF1, PAN3, BCR, TNIK, ROCK1, BRAF, ROCK2, PNCK, WNK1, PIM1, MARK3, STK3, SPAG9, MAPK1, MAPK6, RIOK3, ATP5C1, MAPK9, RIPK4, MST1R, NEK4, NRBP2, KALRN, NEK7, NEK2, NEK1, MAPKAPK5, STK10, HUS1, STK17B, MAPKAPK3, BMPR2, ADRBK2, RIOK2, EPHB4, SDHAF2, VRK1, PTK6, DYRK2, S…	2397	800	13528	1.241619	9.927910e-01	3.780156e-02	2.083471e+00
no Peak	negative regulation of protein modification process	36	0.107742495	1.137928e-03	CAV1, GCLC, PAX5, ANAPC10, PSMF1, PSMB6, PSMB1, PPP2CA, PSMB2, PSMD2, PSMD3, FBXO5, PSMD4, PSMD5, UBE2D1, INSR, DNMT3B, BUB3, ANAPC1, PRKCA, PPP2R1A, ANAPC2, SMAD7, SMAD6, CDC27, YWHAE, PSMB9, PSMC6, PSMD12, PSMC4, PSEN1, PSMA4, DNMT1, ANAPC7, UBB, UBA52	2397	119	13528	1.707344	9.933121e-01	3.807376e-02	2.114828e+00
no Peak	regulation of intracellular protein transport	20	0.059856942	1.237991e-03	BMP4, NFKBIB, TGFBR1, G3BP2, TGFB3, SMAD4, NFKBIA, SMAD3, CDH1, MXI1, PKIA, FLNA, PTPN11, UACA, BCL3, JAK2, MBTPS1, LCP1, BARD1, BMPR1A	2397	53	13528	2.129706	9.956953e-01	4.104212e-02	2.298754e+00
no Peak	positive regulation of cellular biosynthetic process	153	0.457905606	1.250364e-03	XRCC6, STAT5B, TGFB3, FOXO1, FOXO3, CNOT7, MED21, CITED4, CTNNB1, EPC1, GATA2, APP, MLL5, GATA6, APOE, INSR, SAMD4A, MYST3, EIF2B5, SYK, PCBD1, ARID1B, SIX4, MED13, IRS1, TRERF1, AHR, TNKS2, MAPK1, HIF1A, MTF1, MED17, VEGFA, PIAS2, NFE2L2, UBA52, SMARCA4, TMX1, CNBP, BLM, ONECUT2, NFKBIA, SOX6, TEAD4, NPM1, TAF9, DYRK2, RUNX1, RUNX2, TCF3, RNF14, NR1H3, KLF5, TAF2, BMP4, KLF6, YEATS4, KLF7, TAF8,…	2397	685	13528	1.260568	9.959236e-01	4.113417e-02	2.321473e+00
no Peak	negative regulation of ubiquitin-protein ligase activity during mitotic cell cycle	23	0.068835483	1.278436e-03	ANAPC1, ANAPC2, ANAPC10, CDC27, PSMB9, PSMF1, PSMC6, PSMB6, PSMB1, PSMD12, PSMC4, PSMA4, PSMB2, PSMD2, PSMD3, FBXO5, PSMD4, UBB, PSMD5, ANAPC7, UBE2D1, UBA52, BUB3	2397	65	13528	1.997009	9.963976e-01	4.172685e-02	2.373004e+00
no Peak	negative regulation of protein metabolic process	51	0.152635202	1.294812e-03	EIF2C2, IDE, PAX5, NFKB1, TIA1, PSMD2, PSMD3, PSMD4, PSMD5, EIF2B3, INSR, EIF2B5, ANAPC1, PRKCA, ANAPC2, PPP2R1A, FLNA, PSEN1, PSMA4, MDM4, ANAPC7, UBB, CLN8, UBA52, EIF2C3, CAV1, GCLC, PML, ANAPC10, PSMF1, PSMB6, PSMB1, PPP2CA, ITGAV, PSMB2, FBXO5, TAF9, UBE2D1, TNRC6A, DNMT3B, BUB3, SMAD7, SMAD6, CDC27, YWHAE, EIF2B1, PSMB9, PSMC6, PSMC4, PSMD12, DNMT1	2397	187	13528	1.539197	9.966483e-01	4.193931e-02	2.403051e+00
no Peak	mesoderm morphogenesis	16	0.047885554	1.295118e-03	BMP4, TBX3, HTT, BMPR2, SMAD3, SMAD2, SMAD1, SLIT2, WNT3, FOXC1, MESP1, BMP7, EXT2, KLF4, BMPR1A, ACVR1	2397	38	13528	2.376304	9.966528e-01	4.164257e-02	2.403612e+00
no Peak	regulation of protein stability	17	0.050878401	1.411938e-03	NAPG, CCDC88C, SMAD7, HPS4, PML, PRKDC, APTX, PTEN, UBE2B, FLNA, COG3, STX12, CDKN2AIP, BCL2, RBM38, HSPD1, MDM4	2397	42	13528	2.284363	9.979990e-01	4.498697e-02	2.617708e+00
no Peak	positive regulation of RNA metabolic process	112	0.335198875	1.412662e-03	STAT5B, XRCC6, TGFB3, FOXO1, FOXO3, CNOT7, MED21, CTNNB1, EPC1, GATA2, APP, MLL5, GATA6, MED13, SIX4, ARID1B, TRERF1, AHR, HIF1A, MTF1, MED17, VEGFA, PIAS2, NFE2L2, SMARCA4, TMX1, CNBP, ONECUT2, NFKBIA, SOX6, TEAD4, TAF9, RUNX1, TCF3, RUNX2, RNF14, NR1H3, BMP4, TAF2, KLF6, YEATS4, KLF7, TAF8, MAML1, CREBBP, NR4A2, SMAD4, TEAD1, SMAD3, SMAD2, SMAD1, BRCA1, DLX2, HDAC4, RNF6, NOTCH1, SALL4, RNF4, E…	2397	481	13528	1.314131	9.980053e-01	4.468610e-02	2.619034e+00
no Peak	microtubule cytoskeleton organization	42	0.125699578	1.434200e-03	BBS4, CCDC99, CAV1, PRC1, NEK2, HAUS2, HAUS1, CETN3, CTNNB1, HOOK1, TUBGCP3, KIF2C, SPC25, CEP250, CENPA, KATNA1, NPM1, FBXO5, RANBP1, TUBG1, ZW10, KIF11, STMN3, CKAP5, RNF19A, PCNT, KIF18A, NUSAP1, NDC80, MYH9, CEP63, PCM1, UBE2B, BRCA1, SMC3, TACC2, BBS2, MAP7, HAUS8, STMN1, GADD45A, DST	2397	147	13528	1.612492	9.981859e-01	4.502873e-02	2.658459e+00
no Peak	positive regulation of transcription, DNA-dependent	111	0.332206028	1.509647e-03	STAT5B, XRCC6, TGFB3, FOXO1, FOXO3, MED21, CNOT7, CTNNB1, EPC1, GATA2, APP, MLL5, GATA6, MED13, SIX4, ARID1B, TRERF1, AHR, HIF1A, MTF1, MED17, VEGFA, PIAS2, NFE2L2, SMARCA4, TMX1, CNBP, ONECUT2, NFKBIA, SOX6, TEAD4, TAF9, RUNX1, TCF3, RUNX2, RNF14, NR1H3, BMP4, TAF2, KLF6, YEATS4, KLF7, TAF8, MAML1, CREBBP, NR4A2, SMAD4, TEAD1, SMAD3, SMAD2, SMAD1, BRCA1, DLX2, HDAC4, RNF6, NOTCH1, SALL4, RNF4, E…	2397	477	13528	1.313319	9.986988e-01	4.700741e-02	2.796439e+00
no Peak	regulation of mitotic cell cycle	43	0.128692425	1.541149e-03	NBN, MAEA, AURKAIP1, NEK2, HUS1, STAT5B, PML, RPS27L, ASNS, ANAPC10, ZZEF1, CDC42, TRIAP1, APP, C12ORF11, BCL2, CAMK2D, BUB1, TGFA, FBXO5, AATF, RANBP1, BCL6, INSR, MYC, BUB3, ZW10, TERF1, DLG1, APC, CDC6, DLGAP5, SMAD6, SMAD3, NUSAP1, CDC25C, PKIA, KIF20B, MDM2, DGKZ, FOXC1, RBM38, SMARCA4	2397	152	13528	1.596579	9.988674e-01	4.762842e-02	2.853996e+00
no Peak	negative regulation of protein ubiquitination	25	0.074821177	1.543221e-03	GCLC, ANAPC10, PSMF1, PSMB6, PSMB1, PSMB2, PSMD2, FBXO5, PSMD3, PSMD4, PSMD5, UBE2D1, BUB3, ANAPC1, ANAPC2, SMAD7, CDC27, PSMB9, PSMC6, PSMD12, PSMC4, PSMA4, ANAPC7, UBB, UBA52	2397	74	13528	1.906663	9.988776e-01	4.735850e-02	2.857780e+00
no Peak	induction of apoptosis by intracellular signals	20	0.059856942	1.597522e-03	PRKCA, MSH6, AIFM1, PML, RPS27L, MBD4, BRCA1, SART1, CUL3, CUL5, ERCC6, UACA, CUL4A, HMOX1, BCL3, JAK2, DYRK2, ABL1, MYC, CUL1	2397	54	13528	2.090267	9.991164e-01	4.864589e-02	2.956914e+00
no Peak	translation	81	0.242420615	1.652972e-03	MRPS36, ABCF1, EIF2C2, RPL19, MRPS33, COPS5, RPS27L, C2ORF79, IGHMBP2, WARS, NARS2, RPL26L1, EEF2K, POLG2, MRPL32, EIF2B3, EIF2B5, MRPL1, MRPL4, CARS, MRPL3, BRF1, EIF2S3, MRPS5, EIF1B, MRPS6, RPS4X, GTF2B, TARS, EIF4G2, DHX29, MRPS18A, RARS, EIF2S2, EEF1G, UBB, MRPL48, EEFSEC, MTFMT, EIF5A2, UBA52, MRPS15, FARS2, MRPS10, WARS2, KARS, DTD1, QRSL1, MRPL11, EIF3D, MRPL13, MRPL15, PARS2, EIF3H, RPL6…	2397	331	13528	1.381092	9.993079e-01	4.994739e-02	3.058047e+00
no Peak	negative regulation of cellular protein metabolic process	49	0.146649508	1.697899e-03	EIF2C2, IDE, PAX5, NFKB1, TIA1, PSMD2, PSMD3, PSMD4, PSMD5, EIF2B3, INSR, EIF2B5, ANAPC1, PRKCA, ANAPC2, PPP2R1A, PSEN1, PSMA4, ANAPC7, UBB, CLN8, UBA52, EIF2C3, CAV1, GCLC, PML, ANAPC10, PSMF1, PSMB6, PSMB1, PPP2CA, ITGAV, PSMB2, FBXO5, TAF9, UBE2D1, TNRC6A, DNMT3B, BUB3, SMAD7, SMAD6, YWHAE, EIF2B1, CDC27, PSMB9, PSMC6, PSMC4, PSMD12, DNMT1	2397	180	13528	1.536346	9.994322e-01	5.092143e-02	3.139915e+00
no Peak	positive regulation of biosynthetic process	154	0.460898453	1.699649e-03	XRCC6, STAT5B, TGFB3, FOXO1, FOXO3, CNOT7, MED21, CITED4, CTNNB1, EPC1, GATA2, APP, MLL5, GATA6, APOE, INSR, SAMD4A, MYST3, EIF2B5, SYK, PCBD1, ARID1B, SIX4, MED13, IRS1, TRERF1, AHR, TNKS2, MAPK1, HIF1A, MTF1, MED17, VEGFA, PIAS2, NFE2L2, UBA52, SMARCA4, TMX1, CNBP, BLM, ONECUT2, NFKBIA, SOX6, TEAD4, NPM1, TAF9, DYRK2, RUNX1, RUNX2, TCF3, RNF14, NR1H3, KLF5, TAF2, BMP4, KLF6, YEATS4, KLF7, TAF8,…	2397	695	13528	1.250551	9.994365e-01	5.062773e-02	3.143103e+00
no Peak	RNA splicing, via transesterification reactions	43	0.128692425	1.767689e-03	NHP2L1, TRA2A, RBM5, SNRPD1, SNRPD2, SF3B5, SF3B3, SF3B2, SMNDC1, POLR2A, SF3B1, CD2BP2, PCBP2, USP39, HNRNPD, DBR1, DDX20, TGS1, GEMIN6, RBM25, CCAR1, CLNS1A, SRPK2, SNRPA1, SF3B14, DDX1, SF1, YTHDC1, PRPF3, MBNL1, SF3A1, HNRNPR, HNRNPU, PCF11, PHAX, PAPOLA, SNRPB, SLU7, SNRPC, CPSF3, CSTF1, CPSF2, CPSF1	2397	153	13528	1.586144	9.995825e-01	5.224881e-02	3.266958e+00
no Peak	RNA splicing, via transesterification reactions with bulged adenosine as nucleophile	43	0.128692425	1.767689e-03	NHP2L1, TRA2A, RBM5, SNRPD1, SNRPD2, SF3B5, SF3B3, SF3B2, SMNDC1, POLR2A, SF3B1, CD2BP2, PCBP2, USP39, HNRNPD, DBR1, DDX20, TGS1, GEMIN6, RBM25, CCAR1, CLNS1A, SRPK2, SNRPA1, SF3B14, DDX1, SF1, YTHDC1, PRPF3, MBNL1, SF3A1, HNRNPR, HNRNPU, PCF11, PHAX, PAPOLA, SNRPB, SLU7, SNRPC, CPSF3, CSTF1, CPSF2, CPSF1	2397	153	13528	1.586144	9.995825e-01	5.224881e-02	3.266958e+00
no Peak	nuclear mRNA splicing, via spliceosome	43	0.128692425	1.767689e-03	NHP2L1, TRA2A, RBM5, SNRPD1, SNRPD2, SF3B5, SF3B3, SF3B2, SMNDC1, POLR2A, SF3B1, CD2BP2, PCBP2, USP39, HNRNPD, DBR1, DDX20, TGS1, GEMIN6, RBM25, CCAR1, CLNS1A, SRPK2, SNRPA1, SF3B14, DDX1, SF1, YTHDC1, PRPF3, MBNL1, SF3A1, HNRNPR, HNRNPU, PCF11, PHAX, PAPOLA, SNRPB, SLU7, SNRPC, CPSF3, CSTF1, CPSF2, CPSF1	2397	153	13528	1.586144	9.995825e-01	5.224881e-02	3.266958e+00
no Peak	coenzyme metabolic process	43	0.128692425	1.767689e-03	NAMPT, GCLC, HMGCR, PPCDC, C9ORF95, ACOT4, MTHFD1L, PDHB, GCH1, GLRX2, AFMID, ACOT9, MTHFS, GSR, GPHN, AGPAT6, ACSS1, MCEE, GLO1, RPIA, SUCLA2, HMGCL, FH, MOCS3, PDXK, ALDH5A1, ACACA, MTHFSD, NADK, COQ9, COQ7, COQ5, OXSM, DBT, COQ2, PANK3, H6PD, PANK1, MLYCD, SDHD, FPGS, MDH2, MGST1	2397	153	13528	1.586144	9.995825e-01	5.224881e-02	3.266958e+00
no Peak	centrosome organization	14	0.041899859	1.980243e-03	BBS4, KIF11, NEK2, CKAP5, HAUS2, HAUS1, CETN3, PCM1, BRCA1, CTNNB1, CEP250, NPM1, HAUS8, GADD45A	2397	32	13528	2.469128	9.998363e-01	5.796285e-02	3.652914e+00
no Peak	electron transport chain	34	0.101756801	2.071922e-03	TMX1, NDUFB5, ENOX2, COX10, TMX4, NDUFAB1, SDHAF2, NDUFAF1, NDUFB1, GLRX2, NDUFB2, CYB561D1, NDUFS4, NDUFS8, NDUFS1, TXNL1, NDUFA5, NDUFA9, ALDH5A1, FADS1, NDUFA7, CYCS, FADS3, FADS2, NDUFC1, CYB561, NDUFA12, NDUFV3, CYBA, SLC25A13, UQCRH, TXN, SDHD, UQCRB	2397	114	13528	1.683215	9.998907e-01	6.016677e-02	3.818934e+00
no Peak	regulation of DNA metabolic process	34	0.101756801	2.071922e-03	SMARCAD1, NBN, BLM, WRNIP1, HUS1, TGFB3, TIPIN, KITLG, UBE2V2, TERF2IP, IGF1R, PPP2CA, BCL6, MYC, ERCC4, INSR, TERF2, TERF1, MSH6, PPP2R1A, CDC6, BRCC3, MSH3, MSH2, GMNN, PIF1, NDFIP1, RAD50, BRCA1, UIMC1, TNKS2, RNF8, BRE, PCNA	2397	114	13528	1.683215	9.998907e-01	6.016677e-02	3.818934e+00
no Peak	mesoderm formation	15	0.044892706	2.202114e-03	BMP4, HTT, BMPR2, SMAD3, SMAD2, SMAD1, SLIT2, WNT3, FOXC1, MESP1, BMP7, EXT2, KLF4, BMPR1A, ACVR1	2397	36	13528	2.351551	9.999384e-01	6.341094e-02	4.054232e+00
no Peak	regulation of protein import into nucleus	17	0.050878401	2.480843e-03	BMP4, NFKBIB, TGFBR1, TGFB3, SMAD4, G3BP2, NFKBIA, SMAD3, CDH1, MXI1, PKIA, FLNA, UACA, BCL3, JAK2, MBTPS1, BMPR1A	2397	44	13528	2.180529	9.999820e-01	7.069425e-02	4.556151e+00
no Peak	nucleoside metabolic process	22	0.065842636	2.519917e-03	OCLN, ERH, HMGCR, DCK, DGUOK, PRPSAP1, PPCDC, HPRT1, TPMT, PPAT, NME6, PRPSAP2, UMPS, PANK3, PANK1, QTRTD1, DHODH, PEMT, DERA, FPGS, DNMT3B, DUT	2397	64	13528	1.940029	9.999848e-01	7.130714e-02	4.626314e+00
no Peak	histone acetylation	18	0.053871248	2.550662e-03	ING5, SUPT3H, YEATS4, CSRP2BP, ING3, TADA3, CREBBP, HAT1, TADA1, EPC1, PHF17, TAF5L, SAP130, PHF15, TAF9, MYST2, MYST3, BRD8	2397	48	13528	2.116395	9.999868e-01	7.168582e-02	4.681487e+00
no Peak	response to ionizing radiation	21	0.062849789	2.562602e-03	XRCC4, CAV1, BRCC3, XRCC2, BLM, MSH2, NEK1, XRCC6, PML, PRKDC, TOPBP1, BRCA1, C9ORF80, UIMC1, RNF8, ERCC6, THBD, BCL2, BRE, RAD54B, DNMT3B	2397	60	13528	1.975302	9.999874e-01	7.155306e-02	4.702906e+00
no Peak	oxidative phosphorylation	30	0.089785413	2.619703e-03	NDUFB5, ATP6V0E1, COX10, NDUFAB1, ATP5G2, ATP5G1, ATP5G3, SDHAF2, NDUFAF1, NDUFB1, NDUFB2, NDUFS4, NDUFS8, ATP5L, NDUFS1, ATP5J, NDUFA5, NDUFA9, MSH2, NDUFA7, ATP5F1, ATP6V1H, NDUFC1, NDUFV3, ATP6V1A, UQCRH, ATP6V1E2, ATP5C1, ATP5A1, UQCRB	2397	98	13528	1.727670	9.999902e-01	7.262980e-02	4.805274e+00
no Peak	positive regulation of protein import into nucleus, translocation	6	0.017957083	2.654048e-03	BMP4, TGFBR1, SMAD4, TGFB3, JAK2, BMPR1A	2397	7	13528	4.837475	9.999916e-01	7.308761e-02	4.866794e+00
no Peak	negative regulation of DNA recombination	6	0.017957083	2.654048e-03	MSH6, MSH3, BLM, MSH2, NDFIP1, BCL6	2397	7	13528	4.837475	9.999916e-01	7.308761e-02	4.866794e+00
no Peak	protein localization in nucleus	29	0.086792566	2.768502e-03	BBS4, NUP98, XPO6, PML, TGFB3, NFKBIA, POLA2, CSE1L, PPP3CB, BCL3, BCL6, TNPO1, RBM22, HTT, IPO9, TOPORS, MAPK1, SEC61B, RPL23, IPO7, NUP205, TRPS1, IPO5, PTTG1IP, SPTBN1, NOP58, JAK2, KPNA4, RERE	2397	94	13528	1.741148	9.999949e-01	7.564859e-02	5.071544e+00
no Peak	enzyme linked receptor protein signaling pathway	82	0.245413462	2.818569e-03	NRP1, LTBP2, NDST1, STAT5B, TGFB3, AP3S1, FOXO1, SHOC2, PTEN, SLC2A8, MAP3K7, ACVR1B, GAB1, FRS3, INSR, FRS2, GNG7, SYK, PTPRJ, PTPRK, IRAK1, PTPRF, ARID5B, SOCS5, IRS1, FLNA, GRB10, MSX1, NCK1, VEGFA, FOXC1, MST1R, ACVR1, ZFAND5, FUT8, GRB2, CTF1, USP9X, TIPARP, PML, BMPR2, EPHB4, MSX2, IGF1R, UTP11L, RGMB, SOS1, MAP3K1, SH2B2, PIK3R3, UBE2D1, PIK3R1, BMP4, PTPN2, SMAD7, SMAD6, FLT4, MYO1E, TGFB…	2397	342	13528	1.353173	9.999959e-01	7.649046e-02	5.160977e+00
no Peak	protein import into nucleus	27	0.080806872	3.075270e-03	NUP98, XPO6, PML, TGFB3, NFKBIA, POLA2, CSE1L, PPP3CB, BCL3, BCL6, TNPO1, RBM22, HTT, IPO9, MAPK1, SEC61B, RPL23, IPO7, NUP205, TRPS1, IPO5, PTTG1IP, SPTBN1, NOP58, JAK2, KPNA4, RERE	2397	86	13528	1.771866	9.999987e-01	8.266218e-02	5.618270e+00
no Peak	anaphase-promoting complex-dependent proteasomal ubiquitin-dependent protein catabolic process	22	0.065842636	3.112442e-03	ANAPC1, ANAPC2, ANAPC10, CDC27, PSMB9, PSMF1, PSMC6, PSMB6, PSMB1, PSMC4, PSMD12, PSMA4, PSMB2, PSMD2, PSMD3, PSMD4, UBB, PSMD5, ANAPC7, UBE2D1, UBA52, BUB3	2397	65	13528	1.910183	9.999989e-01	8.311324e-02	5.684315e+00
no Peak	negative regulation of transcription from RNA polymerase II promoter	66	0.197527908	3.249265e-03	JDP2, E2F6, NR6A1, PAX5, NFKB1, ZNF202, PAWR, ZNF254, CTNNB1, KCNIP3, IGHMBP2, EPC1, SIN3A, HEY1, DDX20, NR2F2, ZNF496, TBL1XR1, ZNF593, GSC, GABPA, RBL1, ZHX2, ZNF189, TLE1, CSDA, RBBP7, PKIA, MXD4, CTNNBIP1, SUZ12, MSX1, NCOA2, BPTF, ZNF136, MDM2, MDM4, SMARCA4, ZMYND11, SOX6, ZNF174, HEXIM2, HEXIM1, DRAP1, BCL6, BCOR, ETV3, CEBPA, EHMT1, RFX5, SMAD7, RYBP, SMAD3, SKI, MYPOP, WWTR1, FOXP2, DLX2…	2397	266	13528	1.400322	9.999994e-01	8.608914e-02	5.927040e+00
no Peak	negative regulation of molecular function	80	0.239427768	3.271660e-03	RSF1, HMGCR, PRKAG2, ZNF675, NFKB1, LATS2, PAK2, WWP2, APOE, HMOX1, PSMD2, SPRED2, PSMD3, PSMD4, PSMD5, INSR, PRKCA, ANAPC1, IRAK1, ANAPC2, PPP2R1A, PIM1, CST3, PKIB, HBXIP, PKIA, FLNA, GRM4, PSEN1, HIPK3, PSMA4, GADD45G, CSTB, UBB, ANAPC7, COMMD7, CLN8, GADD45A, UBA52, CAV1, SNX6, NFKBIA, ANAPC10, EGLN1, PSMF1, SUMO1, PSMB6, HEXIM2, PSMB1, HEXIM1, PPP2CA, PSMB2, FBXO5, PEX14, UBE2D1, BUB3, TERF1…	2397	334	13528	1.351790	9.999994e-01	8.613936e-02	5.966713e+00
no Peak	regulation of cytoskeleton organization	38	0.113728190	3.775536e-03	DLC1, TRIOBP, DYNC1LI1, CAV1, LIMA1, CAPZA2, ARF6, RDX, ARPC5, CAPZB, TPM1, CTNNB1, PFN2, ARPC3, CEP250, GSN, MAP3K1, NPM1, SKA3, RANBP1, SKA1, TERF1, APC, STMN3, ROCK2, SPTBN4, SMAD3, RICTOR, BRCA1, NEBL, PLK4, ARPC5L, NCK1, MAP4, SPTBN1, MAPRE1, DST, ARAP1	2397	136	13528	1.576922	9.999999e-01	9.817125e-02	6.855145e+00
no Peak	regulation of nucleocytoplasmic transport	20	0.059856942	4.039687e-03	KHDRBS1, BMP4, NFKBIB, TGFBR1, G3BP2, TGFB3, SMAD4, NFKBIA, SMAD3, CDH1, MXI1, PKIA, FLNA, PTPN11, UACA, BCL3, JAK2, MBTPS1, BARD1, BMPR1A	2397	58	13528	1.946111	1.000000e+00	1.040692e-01	7.317715e+00
no Peak	regulation of microtubule cytoskeleton organization	16	0.047885554	4.085299e-03	DYNC1LI1, CAV1, ROCK2, BRCA1, CTNNB1, PLK4, CEP250, NPM1, MAP4, SKA3, RANBP1, MAPRE1, SKA1, DST, APC, TERF1	2397	42	13528	2.149989	1.000000e+00	1.045722e-01	7.397367e+00
no Peak	organelle localization	28	0.083799719	4.094670e-03	COPA, BBS4, CCDC99, MLPH, VPS33B, CDC42, GBF1, PEX1, CENPA, COPB1, NPM1, MKKS, PEX13, ASPM, ZW10, DLGAP5, KIF18A, NUSAP1, NDC80, MYH9, SLIT1, TACC2, BBS2, KIF1B, PSEN1, LRPPRC, COPE, MYH10	2397	92	13528	1.717654	1.000000e+00	1.041950e-01	7.413726e+00
no Peak	cellular macromolecular complex subunit organization	84	0.251399156	4.287141e-03	RSF1, XPO6, COX10, HP1BP3, AP2S1, RBM5, NAP1L1, SNRPD1, SNRPD2, SMNDC1, KIF2C, NDUFS4, H2AFV, PAK2, GSN, GTF2A2, NDUFS8, HIST3H2A, DDX20, TUBG1, TGS1, COX18, MTERFD3, TUBA1C, MYST3, CLNS1A, SRPK2, NUP133, MTERF, SF1, IPO9, MBNL1, H2AFJ, FLNA, TTF2, PTRF, SMARCE1, IPO7, TBCA, NUP205, NCK1, IPO5, SNRPB, SMARCA5, SLU7, SNRPC, STMN1, CAV1, NUP98, NUFIP1, BMS1, TSPYL5, TFAM, CSE1L, CENPA, HJURP, ICT1,…	2397	357	13528	1.327934	1.000000e+00	1.082036e-01	7.749071e+00
no Peak	nuclear import	27	0.080806872	4.339342e-03	NUP98, XPO6, PML, TGFB3, NFKBIA, POLA2, CSE1L, PPP3CB, BCL3, BCL6, TNPO1, RBM22, HTT, IPO9, MAPK1, SEC61B, RPL23, IPO7, NUP205, TRPS1, IPO5, PTTG1IP, SPTBN1, NOP58, JAK2, KPNA4, RERE	2397	88	13528	1.731596	1.000000e+00	1.088269e-01	7.839824e+00
no Peak	cofactor biosynthetic process	29	0.086792566	4.526566e-03	NAMPT, GCLC, COX10, RSAD1, PPCDC, C9ORF95, MTHFD1L, PDHB, GCH1, MTHFS, GPHN, ACSS1, SUCLA2, MOCS3, FECH, PDXK, IREB2, MTHFSD, COQ9, COQ7, COQ5, DBT, COQ2, PANK3, PANK1, MLYCD, SLC25A38, NFE2L1, FPGS	2397	97	13528	1.687298	1.000000e+00	1.126176e-01	8.164623e+00
no Peak	anatomical structure homeostasis	31	0.092778260	4.637478e-03	XRCC5, BBS4, NBN, BLM, FGGY, XRCC6, PRKDC, ZNF675, TERF2IP, CTNNB1, DFNB31, RPA1, HSPA1L, MTM1, TPP1, BCL2, FBXO4, ERCC4, TERF2, FH, APC, TERF1, ACACA, WRN, RAD50, TNKS1BP1, HIF1A, LARGE, VEGFA, PARP1, BARD1	2397	106	13528	1.650522	1.000000e+00	1.145727e-01	8.356522e+00
no Peak	I-kappaB kinase/NF-kappaB cascade	21	0.062849789	4.828295e-03	IRAK1, TRAF2, TBK1, NFKBIB, SNIP1, TIRAP, G3BP2, NFKBIA, ZNF675, TIFA, MALT1, STAT1, AZI2, TANK, MAP3K7, TNFRSF10A, MAP3K1, TICAM1, IKBKG, BCL3, TNIP2	2397	63	13528	1.881240	1.000000e+00	1.183448e-01	8.685787e+00
no Peak	microtubule organizing center organization	14	0.041899859	4.991391e-03	BBS4, KIF11, NEK2, CKAP5, HAUS2, HAUS1, CETN3, PCM1, BRCA1, CTNNB1, CEP250, NPM1, HAUS8, GADD45A	2397	35	13528	2.257489	1.000000e+00	1.214246e-01	8.966328e+00
no Peak	tRNA processing	24	0.071828330	5.109236e-03	RPP25, TRMU, MOCS3, PUS1, FARS2, LCMT2, RG9MTD1, PUS7, FBL, PUS7L, ADAT1, TRMT11, TRMT5, QTRTD1, TRMT12, WDR4, POP1, TRUB1, TRUB2, DUS1L, DUS2L, RPP40, TSEN15, TSEN34	2397	76	13528	1.782228	1.000000e+00	1.234336e-01	9.168526e+00
no Peak	negative regulation of DNA metabolic process	15	0.044892706	5.177301e-03	CDC6, MSH6, MSH3, BLM, MSH2, GMNN, HUS1, NDFIP1, TGFB3, TIPIN, TERF2IP, BCL6, ERCC4, TERF2, TERF1	2397	39	13528	2.170662	1.000000e+00	1.242952e-01	9.285117e+00
no Peak	protein amino acid autophosphorylation	26	0.077814024	5.433179e-03	NEK2, CAMK2G, CAD, FER, ACVR1B, IGF1R, VRK1, CSNK2A1, PAK2, CLK3, MAP3K1, CLK4, CAMK2D, YES1, INSR, SYK, IRAK1, TGFBR1, TAOK3, PIM1, SMG1, TRIM24, NTRK3, ULK1, DYRK1A, JAK2	2397	85	13528	1.726315	1.000000e+00	1.293356e-01	9.722155e+00
no Peak	cofactor metabolic process	50	0.149642355	5.543296e-03	NAMPT, HMGCR, COX10, MTHFD1L, PDHB, ACOT4, AFMID, ACOT9, GSR, ACSS1, AGPAT6, HMOX1, MCEE, SUCLA2, HMGCL, PDXK, FECH, ALDH5A1, COQ9, COQ7, COQ5, COQ2, PANK3, PANK1, H6PD, SLC25A38, NFE2L1, MDH2, GCLC, RSAD1, PPCDC, C9ORF95, GCH1, GLRX2, MTHFS, GPHN, GLO1, RPIA, FH, MOCS3, ACACA, IREB2, MTHFSD, NADK, OXSM, DBT, MLYCD, SDHD, FPGS, MGST1	2397	195	13528	1.447108	1.000000e+00	1.310775e-01	9.909621e+00
no Peak	transmembrane receptor protein serine/threonine kinase signaling pathway	30	0.089785413	5.754896e-03	LTBP2, FUT8, USP9X, PML, TGFB3, BMPR2, MSX2, MAP3K7, ACVR1B, RGMB, MAP3K1, UBE2D1, BMP4, PTPRK, IRAK1, SMAD7, TGFBR1, SMAD6, SMAD4, SMAD3, DUSP22, SKI, SMAD2, SMAD1, MSX1, SPTBN1, SMURF2, BMP7, ACVR1, BMPR1A	2397	103	13528	1.643802	1.000000e+00	1.350180e-01	1.026882e+01
no Peak	regulation of centrosome cycle	6	0.017957083	6.044996e-03	DYNC1LI1, PLK4, ROCK2, NPM1, RANBP1, BRCA1	2397	8	13528	4.232791	1.000000e+00	1.405947e-01	1.075907e+01
no Peak	gastrulation with mouth forming second	10	0.029928471	6.400890e-03	LHX1, LDB1, SMAD4, UGDH, FRS2, PPAP2B, CTNNB1, LRP5, ACVR1, ODZ4	2397	21	13528	2.687486	1.000000e+00	1.474787e-01	1.135704e+01
no Peak	post-embryonic development	23	0.068835483	6.428663e-03	BMP4, TAPT1, ALDH5A1, MYO1E, TGFBR1, ARID5B, TIPARP, IREB2, NR4A2, CCDC47, SMAD2, SOX6, ASL, FOXP2, MUT, GNAQ, PSEN1, LHX1, BCL2, DHCR7, SEMA3C, KLF4, DSCAM	2397	73	13528	1.778159	1.000000e+00	1.473032e-01	1.140355e+01
no Peak	protein amino acid acetylation	18	0.053871248	6.502745e-03	ING5, SUPT3H, YEATS4, CSRP2BP, ING3, TADA3, CREBBP, HAT1, TADA1, EPC1, PHF17, TAF5L, SAP130, PHF15, TAF9, MYST2, MYST3, BRD8	2397	52	13528	1.953596	1.000000e+00	1.481059e-01	1.152748e+01
no Peak	ribosome biogenesis	34	0.101756801	6.586973e-03	NAF1, RNASEL, SDAD1, UTP18, SURF6, NHP2L1, UTP15, ERI1, PIN4, BMS1, EXOSC10, EBNA1BP2, UTP11L, WDR36, RRP1B, FRG1, NPM1, AATF, RSL24D1, RPS24, UTP23, EXOSC6, EXOSC2, MPHOSPH10, RPS6, NOP10, FBL, MRTO4, RPS7, NOLC1, NOP58, PES1, C1D, DDX51	2397	122	13528	1.572840	1.000000e+00	1.491114e-01	1.166819e+01
no Peak	maintenance of location in cell	17	0.050878401	6.635026e-03	SRI, BBS4, CAV1, TLN1, NFKBIB, SPTBN4, G3BP2, PML, NFKBIA, NDC80, TOPORS, MXI1, FLNB, FLNA, APOE, BCL3, ASPM	2397	48	13528	1.998818	1.000000e+00	1.493524e-01	1.174837e+01
no Peak	BMP signaling pathway	16	0.047885554	6.704480e-03	BMP4, SMAD7, SMAD6, USP9X, BMPR2, SMAD4, SKI, SMAD1, MSX2, RGMB, MSX1, SMURF2, UBE2D1, BMP7, BMPR1A, ACVR1	2397	44	13528	2.052262	1.000000e+00	1.500334e-01	1.186414e+01
no Peak	coenzyme biosynthetic process	22	0.065842636	6.769022e-03	NAMPT, MOCS3, GCLC, PDXK, MTHFSD, COQ9, PPCDC, COQ7, C9ORF95, MTHFD1L, PDHB, COQ5, GCH1, DBT, MTHFS, GPHN, ACSS1, COQ2, PANK3, PANK1, MLYCD, FPGS	2397	69	13528	1.799447	1.000000e+00	1.506055e-01	1.197159e+01
no Peak	establishment of organelle localization	22	0.065842636	6.769022e-03	BBS4, COPA, CCDC99, DLGAP5, KIF18A, NUSAP1, NDC80, MYH9, SLIT1, CDC42, BBS2, KIF1B, PSEN1, GBF1, CENPA, COPB1, NPM1, MKKS, LRPPRC, COPE, MYH10, ZW10	2397	69	13528	1.799447	1.000000e+00	1.506055e-01	1.197159e+01
no Peak	negative regulation of organelle organization	25	0.074821177	6.803156e-03	DLC1, TRIOBP, LIMA1, AURKAIP1, CAPZA2, PAX5, RDX, TERF2IP, CAPZB, GSN, MAP3K1, NPM1, BUB1, DNMT3B, ERCC4, TERF2, APC, TERF1, SPTBN4, BRCA1, DNMT1, MAP4, SPTBN1, MAPRE1, ARAP1	2397	82	13528	1.720647	1.000000e+00	1.505497e-01	1.202836e+01
no Peak	RNA localization	29	0.086792566	7.138588e-03	ENY2, NXT1, NUP98, AGFG1, NUP160, NXT2, STAU1, NUP210, NPM1, NUP37, NUP35, XPOT, NUP133, NUP153, MYO1C, CKAP5, G3BP2, SMG1, CASC3, NXF1, NUPL2, NUPL1, BICD1, PHAX, NUP205, THOC5, THOC2, EIF5A2, LRPPRC	2397	100	13528	1.636679	1.000000e+00	1.566001e-01	1.258447e+01
no Peak	regulation of protein modification process	70	0.209499297	7.480214e-03	DLC1, BTRC, PRKAG2, TGFB3, PAX5, PRKAR2B, NDUFS4, GAB1, PSMD2, PSMD3, PSMD4, RAPGEF3, PSMD5, INSR, CUL1, SYK, PRKCA, ANAPC1, ANAPC2, PPP2R1A, CCDC88C, SKP1, PSEN1, HIPK3, PSMA4, UBB, ANAPC7, UBA52, ZER1, ATG10, CAV1, GCLC, BMPR2, PML, KITLG, ANAPC10, FEM1B, PSMF1, PSMB6, ERCC6, PSMB1, PPP2CA, BCL2, MAP3K1, PSMB2, FBXO5, FBXO4, UBE2D1, DNMT3B, BUB3, BMP4, SMAD7, SMAD6, TGFBR1, NDFIP1, SMAD4, RICTO…	2397	295	13528	1.339188	1.000000e+00	1.626689e-01	1.314742e+01
no Peak	regulation of cell cycle process	32	0.095771107	7.627670e-03	DYNC1LI1, AURKAIP1, NEK2, PML, TIPIN, ANAPC10, ZZEF1, CDC42, TRIAP1, NPM1, BUB1, CAMK2D, FBXO5, TGFA, BCL6, RANBP1, INSR, ZW10, TERF1, APC, ROCK2, SMAD6, DLGAP5, NUSAP1, CDC25C, PKIA, BRCA1, PLK4, TIMELESS, KIF20B, RBM38, SMARCA4	2397	114	13528	1.584202	1.000000e+00	1.647972e-01	1.338934e+01
no Peak	immune system development	66	0.197527908	7.886788e-03	XRCC5, BMI1, XRCC4, NBN, MAEA, STAT5B, XRCC6, TIRAP, ZNF675, JAG1, CIAPIN1, CTNNB1, CTNNBL1, CDC42, MLL5, MYST3, FLVCR1, SYK, LIG1, DLL1, OSTM1, SIX4, MYH9, CD164, PSEN1, VEGFA, SLC25A38, MED1, BLM, TIPARP, PML, KITLG, PRKDC, SFXN1, SOX6, ITGB1, RPA1, BCL2, PPP3CB, BCL3, BCL6, TCEA1, RUNX1, TCF3, PIK3R1, APC, EXO1, BMP4, CEBPA, MSH6, KLF6, MSH3, MSH2, MYO1E, TGFBR1, ZNF160, MALT1, ATP7A, NOTCH2, …	2397	276	13528	1.349586	1.000000e+00	1.690884e-01	1.381292e+01
no Peak	transcription initiation	25	0.074821177	7.999986e-03	E2F3, RSF1, POLR2A, GTF2E1, RTF1, GTF2A2, TAF9, ERCC3, MYC, GTF3C4, TAF2, TAF4, BRF1, TAF4B, GTF2H3, TRIM24, MED13, GTF2B, GTF2H1, PTRF, GTF2I, MED16, MED17, SMARCA5, MED1	2397	83	13528	1.699916	1.000000e+00	1.704791e-01	1.399735e+01
no Peak	protein amino acid dephosphorylation	36	0.107742495	8.301957e-03	PDP1, PPP6C, SSH1, PPM1A, DUSP10, DUSP12, TIMM50, PPM1B, DUSP11, PTEN, C2ORF79, MTM1, MTMR3, BCL2, PPP2CA, PTPLA, PPP3CB, PTPRJ, PPP2R1A, PTPRK, PTPN9, PTPRF, PTPN2, PTPN4, PTPN14, PTPRS, PTPN13, DUSP22, CDC25C, PTPDC1, PTPN12, PTPN11, DUSP4, DUSP28, SBF1, PPP2R2A	2397	133	13528	1.527624	1.000000e+00	1.754938e-01	1.448751e+01
no Peak	spindle organization	16	0.047885554	8.443395e-03	KIF11, PRC1, HAUS2, PCNT, HAUS1, NDC80, MYH9, CEP63, SMC3, TACC2, SPC25, FBXO5, RANBP1, TUBG1, HAUS8, STMN1	2397	45	13528	2.006656	1.000000e+00	1.773665e-01	1.471618e+01
no Peak	mitochondrion organization	37	0.110735343	8.676260e-03	GGCT, COX10, MTX3, TIMM17A, TIMM50, BCL2L1, PMAIP1, MIPEP, TFAM, IMMP2L, NDUFS4, MAP3K1, COL4A3BP, BCL2, CASP7, NDUFS8, HSPA4, FANCG, COX18, MYC, DNAJC19, CEBPA, C6ORF168, MTERF, OPA1, SSBP1, HTT, SMAD3, TIMM8A, ATP7A, PPIF, LETM1, TOMM70A, PTCD2, C3ORF31, CLN8, DAP3	2397	138	13528	1.513172	1.000000e+00	1.809480e-01	1.509140e+01
no Peak	microtubule-based process	61	0.182563673	8.926776e-03	PRC1, CTNNB1, HOOK1, KIF2C, APP, DYNLL1, CEP250, PEX1, DYNLL2, RANBP1, TUBG1, TUBA1C, ZW10, OPA1, KIF11, KIF5B, STMN3, KIF15, KTN1, NUSAP1, KIF16B, MYH9, PCM1, BICD2, UBE2B, TACC2, EML4, BBS2, KIF1B, HAUS8, STMN1, KIF26A, GADD45A, DST, LRPPRC, BBS4, CAV1, CCDC99, NEK2, HAUS2, HAUS1, CETN3, SPC25, TUBGCP3, CENPA, KATNA1, NPM1, FBXO5, PEX13, HTT, CKAP5, RNF19A, PCNT, KIF18A, NDC80, CEP63, SMC3, BRC…	2397	253	13528	1.360739	1.000000e+00	1.848090e-01	1.549333e+01
no Peak	transcription from RNA polymerase II promoter	57	0.170592284	9.318075e-03	CCNT2, E2F3, ARID4A, COPS5, PAX5, NFKB1, PTTG1, TMF1, GTF2E1, TAF5L, GTF2A2, KDM5A, MYC, RREB1, TAF4B, GABPA, GTF2H3, MED13, GTF2B, AHR, ELL2, GTF2H1, HIF1A, PRDM4, GTF2I, MED16, MED17, ASH1L, NFE2L1, NFE2L2, MED1, SUPT3H, CCRN4L, ELL, BMPR2, NR3C1, POLR2A, ERCC6, TCEA1, TAF9, HSF2BP, ERCC3, TRIP11, NFATC1, CEBPA, TAF2, KLF5, TAF4, TRIP4, CEBPB, NFRKB, TRIM24, PMF1, STAT1, TRPS1, PARP1, NFIC	2397	234	13528	1.374753	1.000000e+00	1.912230e-01	1.611752e+01
no Peak	vesicle-mediated transport	125	0.374105887	9.398806e-03	SEC31A, AP4E1, AP1G1, USE1, CNO, ITSN2, VPS33B, TSNARE1, TAPBP, CTNNB1, HOOK1, GATA2, APP, GBF1, PACSIN2, APOE, VPS4B, SAR1B, SAR1A, YIF1A, VTI1A, TRIM36, GAPVD1, RAB18, ARRB1, USO1, VPS26A, TRAPPC3, TRAPPC2, KALRN, PACS1, RAB7A, TMX1, STX8, CAV1, NAPG, SNX2, SNX1, RABEPK, ARF6, ARFGEF2, LLGL2, STX12, BLOC1S3, ITGAV, STX16, STX10, SDF4, RHOBTB3, HTT, SPTBN4, GARS, LIN7C, TINAGL1, CORO1C, VCP, AKT…	2397	576	13528	1.224766	1.000000e+00	1.918291e-01	1.624575e+01
no Peak	regulation of intracellular transport	22	0.065842636	9.617480e-03	KHDRBS1, BMP4, NFKBIB, TGFBR1, G3BP2, TGFB3, SMAD4, NFKBIA, SMAD3, CDH1, MXI1, PKIA, FLNA, PTPN11, UACA, BCL3, JAK2, MBTPS1, LCP1, CALM1, BARD1, BMPR1A	2397	71	13528	1.748759	1.000000e+00	1.949484e-01	1.659217e+01
no Peak	heart development	53	0.158620896	9.654852e-03	DLC1, NRP1, PTEN, CTNNB1, GATA6, CASP7, COL4A3BP, MKKS, SEMA3C, MKL2, INSR, MAP2K5, PTPRJ, MIB1, MSX1, GNAQ, PSEN1, MOSPD3, FOXC1, IFT88, SMARCA4, ACVR1, MED1, IRX4, SRI, BBS4, PRKDC, EGLN1, SOX6, ITGB1, TPM1, MSX2, HEXIM1, PPP3CB, NKX3-1, BCOR, NFATC1, BMP4, TBX3, SMAD7, TGFBR1, TEAD1, SMAD2, NOTCH1, SALL4, PKP2, PTCD2, PTCH1, IFT52, MESP1, POFUT1, MYH10, BMPR1A	2397	215	13528	1.391243	1.000000e+00	1.947404e-01	1.665124e+01
no Peak	glycoprotein biosynthetic process	41	0.122706731	1.001761e-02	GALNT3, OSTC, LDLR, NDST1, FUT8, GALNT6, FUT5, ALG8, HS2ST1, STT3B, ST3GAL1, POMT2, ST3GAL2, B3GALNT1, DAD1, HS6ST1, RPN2, FUT2, B3GNT2, FKRP, GCNT1, SDF2, PHLDA1, B4GALT1, MAN1A2, COG3, ATP7A, MGAT1, LARGE, PSEN1, ST8SIA4, CSGALNACT2, CHST8, DPM1, DPM2, EXT1, POFUT1, EXT2, ALG12, HS3ST3B1, COG2	2397	158	13528	1.464510	1.000000e+00	2.003926e-01	1.722254e+01
no Peak	histone H3 acetylation	11	0.032921318	1.007002e-02	ING5, SUPT3H, PHF17, TAF5L, TADA3, SAP130, PHF15, TAF9, TADA1, MYST2, MYST3	2397	26	13528	2.387728	1.000000e+00	2.004296e-01	1.730477e+01
no Peak	negative regulation of cell differentiation	53	0.158620896	1.058198e-02	NBN, NRP1, STAT5B, EZH2, ZNF675, JAG1, CTNNB1, ASPM, MYST3, ARHGEF1, LDB1, DLL1, SOCS5, MAPK1, MIB1, PSEN1, PRDM6, THOC5, CAV1, NFKBIA, ITGB1, TTC3, ZC3H8, ITGAV, BCL6, RUNX1, APC, NR1H3, BMP4, TBX3, SMAD7, TGFBR1, CREBBP, RTN4R, SMAD3, SKI, RCAN1, WWTR1, NOTCH3, DLX2, ATF5, NOTCH2, HDAC4, NOTCH1, RNF6, DLX1, YWHAH, ULK1, PBX1, ID4, BMP7, KLF4, BMPR1A	2397	216	13528	1.384802	1.000000e+00	2.085889e-01	1.810399e+01
no Peak	regulation of chromosome organization	12	0.035914165	1.060672e-02	PIF1, CENPV, PML, DNMT1, PAX5, TERF2IP, ERCC4, MYC, DNMT3B, TERF2, TERF1, TNKS2	2397	30	13528	2.257489	1.000000e+00	2.081006e-01	1.814242e+01
no Peak	axis specification	12	0.035914165	1.060672e-02	TBX3, LHX1, LDB1, SMAD6, FRAT1, SMAD2, TTC8, BCOR, FRS2, CTNNB1, BMPR1A, APC	2397	30	13528	2.257489	1.000000e+00	2.081006e-01	1.814242e+01
no Peak	regulation of telomere maintenance	7	0.020949930	1.069800e-02	PIF1, TERF2IP, ERCC4, MYC, TERF2, TERF1, TNKS2	2397	12	13528	3.292171	1.000000e+00	2.087764e-01	1.828408e+01
no Peak	retrograde transport, endosome to Golgi	7	0.020949930	1.069800e-02	STX16, BET1L, VPS35, GOSR1, VPS26A, VTI1A, RHOBTB3	2397	12	13528	3.292171	1.000000e+00	2.087764e-01	1.828408e+01
no Peak	positive regulation of SMAD protein nuclear translocation	5	0.014964235	1.086875e-02	BMP4, TGFBR1, SMAD4, TGFB3, BMPR1A	2397	6	13528	4.703101	1.000000e+00	2.108200e-01	1.854846e+01
no Peak	regulation of SMAD protein nuclear translocation	5	0.014964235	1.086875e-02	BMP4, TGFBR1, SMAD4, TGFB3, BMPR1A	2397	6	13528	4.703101	1.000000e+00	2.108200e-01	1.854846e+01
no Peak	protein kinase cascade	84	0.251399156	1.109502e-02	GNA13, STK38, NDST1, TBK1, THOP1, PRKAG2, GNA12, STAT5B, SNIP1, TIRAP, TGFB3, ZNF675, LATS2, MAP3K7, HMOX1, GAB1, TICAM1, SPRED2, TGFA, TNIP2, INSR, FRS2, MAP2K5, SYK, PRKCA, SRPK2, PPP2R1A, IRAK1, TNIK, BRAF, PIK3C2B, SOCS6, G3BP2, WNK1, TIFA, DAPK2, IRS1, STK3, TANK, TNFRSF10A, TYK2, MAPK1, SPAG9, GRM4, PSEN1, GADD45G, MAPK9, TRAF2, CAV1, GRB2, NFKBIB, STK17B, DUSP10, NFKBIA, AZI2, IGF1R, ERCC6…	2397	370	13528	1.281277	1.000000e+00	2.137908e-01	1.889754e+01
no Peak	intra-Golgi vesicle-mediated transport	9	0.026935624	1.135969e-02	COG3, PACS1, NAPG, COPB1, STX16, GOSR1, GOLGA3, COPE, COG2	2397	19	13528	2.673342	1.000000e+00	2.173750e-01	1.930407e+01
no Peak	regulation of protein import into nucleus, translocation	6	0.017957083	1.162752e-02	BMP4, TGFBR1, SMAD4, TGFB3, JAK2, BMPR1A	2397	9	13528	3.762481	1.000000e+00	2.209628e-01	1.971351e+01
no Peak	striatum development	6	0.017957083	1.162752e-02	BBS4, BBS2, HTT, MKKS, HPRT1, FOXP2	2397	9	13528	3.762481	1.000000e+00	2.209628e-01	1.971351e+01
no Peak	positive regulation of transcription from RNA polymerase II promoter	84	0.251399156	1.187308e-02	STAT5B, XRCC6, TGFB3, FOXO1, NFKB1, FOXO3, CNOT7, MED21, SKAP1, CTNNB1, ZBTB38, EPC1, GATA2, APP, GATA6, GTF2A2, PAX8, MKL2, MYC, TBL1XR1, MED13, SIX4, NPAS4, AHR, GTF2H1, MED6, NCOA2, HIF1A, MTF1, MED17, VEGFA, FOXC1, TBX19, MED1, SMARCA4, CNBP, ONECUT2, NUFIP1, PRKDC, NFKBIA, SOX6, SQSTM1, MAP3K1, TEAD4, POU2F1, BCL3, TCEA1, TAF9, AATF, ERCC3, RUNX1, TCF3, RUNX2, NR1H3, BMP4, CEBPA, TAF2, KLF6,…	2397	371	13528	1.277824	1.000000e+00	2.241293e-01	2.008715e+01
no Peak	somatic diversification of immune receptors	11	0.032921318	1.350475e-02	EXO1, XRCC4, MSH6, NBN, MSH3, MSH2, LIG1, XRCC6, PRKDC, HSPD1, CTNNBL1	2397	27	13528	2.299294	1.000000e+00	2.498584e-01	2.252846e+01
no Peak	protein amino acid acylation	19	0.056864095	1.360174e-02	ING5, SUPT3H, YEATS4, ING3, CSRP2BP, TADA3, CREBBP, HAT1, TADA1, EPC1, PHF17, TAF5L, ZDHHC17, SAP130, PHF15, TAF9, MYST2, MYST3, BRD8	2397	60	13528	1.787178	1.000000e+00	2.503783e-01	2.267132e+01
no Peak	regulation of cellular component biogenesis	37	0.110735343	1.370835e-02	DLC1, TRIOBP, BBS4, CAV1, CAPZA2, TGFB3, ARF6, RDX, ARPC5, PTEN, CAPZB, TPM1, CDC42, SUMO1, ARPC3, PVRL1, GSN, MAP3K1, RALA, PRKAA1, MDN1, TERF1, APC, PRKCA, TGFBR1, SMAD6, SPTBN4, SMAD3, RICTOR, AHR, ARPC5L, NCK1, SPTBN1, UBB, MAPRE1, UBA52, ARAP1	2397	142	13528	1.470547	1.000000e+00	2.510462e-01	2.282808e+01
no Peak	generation of precursor metabolites and energy	72	0.215484991	1.386030e-02	CYB5R4, ATP6V0E1, ENOX2, GNPDA1, COX10, PRKAG2, NDUFAB1, OGDH, NDUFAF1, PDHB, NDUFS4, NDUFS8, ATP5L, SUCLA2, DHTKD1, COX17, NDUFS1, ATP5J, TXNL1, FECH, ALDH5A1, PHKG2, CYCS, ATP6V1H, COX4I1, NDUFC1, NDUFA12, ATP6V1A, UQCRH, TXN, GIPR, ATP5C1, MDH2, UQCRB, TMX1, NDUFB5, ECH1, ADPGK, TMX4, COX7C, HK2, ATP5G2, ATP5G1, ATP5G3, SDHAF2, NDUFB1, NDUFB2, GLRX2, CYB561D1, PPP1R3B, AGL, FH, CEBPA, NDUFA5, …	2397	313	13528	1.298236	1.000000e+00	2.524241e-01	2.305098e+01
no Peak	lipid modification	21	0.062849789	1.426357e-02	SOAT1, ECH1, PIK3C2A, PIK3C2B, PI4KA, ECHS1, SMG1, CRAT, DECR1, PTEN, HADHA, CPT1A, HADHB, ACOX3, SLC35C1, MTMR1, MAPK14, PRKAA1, PEX13, ALG13, PIK3R1	2397	69	13528	1.717654	1.000000e+00	2.577227e-01	2.363959e+01
no Peak	ribonucleoprotein complex assembly	21	0.062849789	1.426357e-02	CLNS1A, SRPK2, RBM5, DDX1, SF1, SNRPD1, SNRPD2, NUFIP1, MBNL1, SF3A1, BMS1, SMNDC1, PHAX, NPM1, USP39, SNRPB, SLU7, DDX20, SNRPC, TGS1, GEMIN6	2397	69	13528	1.717654	1.000000e+00	2.577227e-01	2.363959e+01
no Peak	negative regulation of transferase activity	27	0.080806872	1.446917e-02	CAV1, SNX6, HMGCR, PRKAG2, ZNF675, LATS2, PAK2, HEXIM2, HEXIM1, APOE, PPP2CA, SPRED2, APC, TERF1, PRKCA, PPP2R1A, PIF1, DUSP22, PKIB, PKIA, YWHAG, PSEN1, RGS3, HIPK3, GADD45G, GADD45A, CLN8	2397	96	13528	1.587297	1.000000e+00	2.598781e-01	2.393804e+01
no Peak	negative regulation of apoptosis	80	0.239427768	1.467862e-02	XRCC5, XRCC4, MAEA, XRCC2, STAT5B, TGFB3, FOXO1, NFKB1, SGMS1, CIAPIN1, PTEN, MAP3K7, TRIAP1, BAG4, APOE, HMOX1, MYC, IRAK1, ZC3HC1, SGK3, BRAF, ROCK1, DFFA, PIM1, PRKCI, HRK, CSDA, HBXIP, NME6, MSX1, PSEN1, BNIP1, HIPK3, TNFAIP8, VEGFA, FOXC1, UBB, CLN8, UBA52, ACVR1, TMX1, GCLC, XIAP, NFKBIA, ASNS, BCL2L1, MSX2, IGF1R, SQSTM1, BCL2, NPM1, DAD1, BCL3, BCL6, FAIM, TAF9, GLO1, AATF, APC, HSPA9, ST…	2397	354	13528	1.275417	1.000000e+00	2.620669e-01	2.424094e+01
no Peak	positive regulation of cellular component organization	45	0.134678119	1.489661e-02	BBS4, CAV1, PML, TGFB3, ARF6, TPM1, CDC42, GATA2, SUMO1, MAP3K1, NPM1, TGFA, RALA, RANBP1, INSR, DNMT3B, TERF2, PIK3R1, TERF1, APC, PRKCA, ARHGEF1, PTPRF, ROCK2, TGFBR1, DLGAP5, SMAD4, PRKCI, SMAD3, NUSAP1, SMAD2, SMAD1, RICTOR, SLIT2, AHR, NUMBL, TNKS2, AMIGO1, NTRK3, MIB1, PLK4, NCK1, DNMT1, EIF5A2, ARAP1	2397	181	13528	1.403135	1.000000e+00	2.643602e-01	2.455498e+01
no Peak	cytoskeleton organization	96	0.287313321	1.541925e-02	DLC1, LIMA1, TLN1, MAEA, PRC1, CAPZA2, FERMT2, CTNNB1, HOOK1, CDC42, KIF2C, PAK2, DYNLL1, CEP250, PACSIN2, GSN, APOE, RALA, RANBP1, TUBG1, ZW10, DLG1, KIF11, ROCK1, STMN3, ROCK2, PRKCI, NUSAP1, ACTN1, ARHGEF17, MYH9, PCM1, LPIN1, FLNB, UBE2B, FLNA, TACC2, BBS2, RND3, NCK1, STMN1, HAUS8, CLN8, DST, GADD45A, LCP1, PARVA, ABLIM1, TRIOBP, BBS4, CAV1, CCDC99, SHROOM3, AGFG1, SSH1, NEK2, CALD1, HAUS2, …	2397	436	13528	1.242654	1.000000e+00	2.712311e-01	2.530289e+01
no Peak	mesoderm development	22	0.065842636	1.562204e-02	BMP4, NUP133, TBX3, HTT, BMPR2, SMAD3, SMAD2, SMAD1, SLIT2, WNT3, PPP2CA, VEGFA, EPB41L5, JAK2, FOXC1, EXT1, MESP1, BMP7, EXT2, KLF4, BMPR1A, ACVR1	2397	74	13528	1.677863	1.000000e+00	2.732083e-01	2.559120e+01
no Peak	negative regulation of cell development	16	0.047885554	1.586699e-02	BMP4, ARHGEF1, NRP1, SMAD7, RTN4R, TTC3, ATF5, DLX2, DLX1, RNF6, YWHAH, PSEN1, ULK1, ID4, BMP7, BMPR1A	2397	48	13528	1.881240	1.000000e+00	2.757889e-01	2.593804e+01
no Peak	anti-apoptosis	50	0.149642355	1.594467e-02	STAT5B, FOXO1, NFKB1, CIAPIN1, TRIAP1, BAG4, APOE, HMOX1, MYC, IRAK1, ZC3HC1, BRAF, SGK3, PRKCI, HRK, HBXIP, NME6, BNIP1, PSEN1, HIPK3, VEGFA, TNFAIP8, FOXC1, UBB, UBA52, TMX1, GCLC, XIAP, NFKBIA, BCL2L1, IGF1R, SQSTM1, BCL2, NPM1, DAD1, AATF, GLO1, HSPA9, STAMBP, CEBPB, TBX3, HTT, TGFBR1, BIRC6, MALT1, ANXA5, NOTCH2, ATF5, PRLR, CFDP1	2397	206	13528	1.369835	1.000000e+00	2.758699e-01	2.604771e+01
no Peak	proteolysis	214	0.640469278	1.595818e-02	DZIP3, THOP1, PPP2R5C, RNF216, ZNRF1, CD2AP, CUL3, CUL5, BTBD1, WWP2, CD46, CUL1, ANAPC1, ANAPC2, ZC3HC1, UBE2J1, UBR1, SKP1, UBE2J2, MYH9, BRAP, HUWE1, BACE2, ST14, FBXL5, YME1L1, PIAS2, AMFR, ANAPC7, RAD23B, CTSL2, MST1, ASB13, RAB40B, ARIH1, FBXO5, FBXO4, FBXO8, SPOP, OSGEP, FOXRED2, TINAGL1, CDC27, RNF8, TULP4, RNF6, UBA2, SMURF2, UBE2G1, SENP8, NFKB1, SENP7, LNPEP, USP12, FBXL12, NSMCE2, NEU…	2397	1054	13528	1.145879	1.000000e+00	2.750056e-01	2.606677e+01
no Peak	RNA transport	27	0.080806872	1.652656e-02	ENY2, NXT1, NUP98, AGFG1, NUP160, NXT2, NUP210, NPM1, NUP37, NUP35, XPOT, NUP133, NUP153, MYO1C, CKAP5, G3BP2, SMG1, CASC3, NXF1, NUPL2, NUPL1, PHAX, NUP205, THOC5, THOC2, EIF5A2, LRPPRC	2397	97	13528	1.570933	1.000000e+00	2.822500e-01	2.686436e+01
no Peak	establishment of RNA localization	27	0.080806872	1.652656e-02	ENY2, NXT1, NUP98, AGFG1, NUP160, NXT2, NUP210, NPM1, NUP37, NUP35, XPOT, NUP133, NUP153, MYO1C, CKAP5, G3BP2, SMG1, CASC3, NXF1, NUPL2, NUPL1, PHAX, NUP205, THOC5, THOC2, EIF5A2, LRPPRC	2397	97	13528	1.570933	1.000000e+00	2.822500e-01	2.686436e+01
no Peak	nucleic acid transport	27	0.080806872	1.652656e-02	ENY2, NXT1, NUP98, AGFG1, NUP160, NXT2, NUP210, NPM1, NUP37, NUP35, XPOT, NUP133, NUP153, MYO1C, CKAP5, G3BP2, SMG1, CASC3, NXF1, NUPL2, NUPL1, PHAX, NUP205, THOC5, THOC2, EIF5A2, LRPPRC	2397	97	13528	1.570933	1.000000e+00	2.822500e-01	2.686436e+01
no Peak	phosphoinositide biosynthetic process	14	0.041899859	1.713874e-02	IMPA1, PIGY, PIK3C2A, PIGW, PI4KA, ALG9, PIGN, PLAUR, PIGK, PIGL, PIGH, DPM1, DPM2, ALG12	2397	40	13528	1.975302	1.000000e+00	2.899895e-01	2.771431e+01
no Peak	somatic cell DNA recombination	10	0.029928471	1.721807e-02	EXO1, XRCC4, MSH6, NBN, MSH3, MSH2, LIG1, XRCC6, PRKDC, HSPD1	2397	24	13528	2.351551	1.000000e+00	2.900294e-01	2.782376e+01
no Peak	somatic diversification of immune receptors via germline recombination within a single locus	10	0.029928471	1.721807e-02	EXO1, XRCC4, MSH6, NBN, MSH3, MSH2, LIG1, XRCC6, PRKDC, HSPD1	2397	24	13528	2.351551	1.000000e+00	2.900294e-01	2.782376e+01
no Peak	androgen receptor signaling pathway	13	0.038907012	1.758757e-02	FHL2, MED13, BRCA1, CTNNB1, NCOA3, RNF4, MED16, MED17, PIAS2, KDM3A, PMEPA1, RNF14, MED1	2397	36	13528	2.038010	1.000000e+00	2.941734e-01	2.833151e+01
no Peak	protein stabilization	11	0.032921318	1.774633e-02	COG3, STX12, NAPG, SMAD7, HPS4, PML, RBM38, HSPD1, MDM4, UBE2B, FLNA	2397	28	13528	2.217176	1.000000e+00	2.953094e-01	2.854863e+01
no Peak	dephosphorylation	39	0.116721037	1.781841e-02	PDP1, PPP6C, SSH1, DUSP10, PPM1A, DUSP12, TIMM50, DUSP11, PPM1B, PTEN, C2ORF79, MTM1, MTMR3, MTMR1, BCL2, PPP2CA, PTPLA, PPP3CB, PTPRJ, PPP2R1A, PTPRK, PTPN9, PTPRF, PTPN2, PTPN4, PTPN14, PTPRS, PTPN13, DUSP22, CDC25C, PTPDC1, PTPN12, PTPN11, MTMR12, DUSP4, MTMR11, DUSP28, SBF1, PPP2R2A	2397	154	13528	1.429254	1.000000e+00	2.952244e-01	2.864700e+01
no Peak	spliceosome assembly	12	0.035914165	1.782326e-02	SRPK2, USP39, SNRPD1, RBM5, DDX1, SF1, SLU7, SNRPD2, MBNL1, GEMIN6, SF3A1, SMNDC1	2397	32	13528	2.116395	1.000000e+00	2.942048e-01	2.865361e+01
no Peak	negative regulation of catalytic activity	64	0.191542214	1.849585e-02	HMGCR, PRKAG2, ZNF675, NFKB1, LATS2, PAK2, APOE, PSMD2, SPRED2, PSMD3, PSMD4, PSMD5, PRKCA, ANAPC1, ANAPC2, PPP2R1A, CST3, PKIB, HBXIP, PKIA, FLNA, GRM4, PSEN1, PSMA4, HIPK3, GADD45G, CSTB, ANAPC7, UBB, CLN8, GADD45A, UBA52, CAV1, SNX6, ANAPC10, PSMF1, PSMB6, HEXIM2, PSMB1, HEXIM1, PPP2CA, PSMB2, FBXO5, UBE2D1, BUB3, TERF1, APC, HERPUD1, SMAD7, PIF1, SMAD6, DUSP22, NPY1R, CDC27, PSMB9, ATP7A, YWH…	2397	277	13528	1.303964	1.000000e+00	3.024045e-01	2.956528e+01
no Peak	protein repair	4	0.011971388	1.925493e-02	SEPX1, PCMT1, MSRB2, MSRB3	2397	4	13528	5.643721	1.000000e+00	3.116117e-01	3.058094e+01
no Peak	lipid biosynthetic process	73	0.218477838	1.959140e-02	IMPA1, HMGCR, EDN2, PRKAG2, NDUFAB1, LSS, SGMS1, PMVK, LASS5, ALG9, FDFT1, FAR1, ACBD3, PIGK, FAR2, AGPAT6, PIGL, PIGH, ELOVL2, SRD5A1, ELOVL7, ELOVL6, PTDSS1, AGPAT3, SYK, ACAA2, PIGY, SPTLC2, PIK3C2A, PIGW, UGCG, PI4KA, CERCAM, CDS1, TRERF1, PLAUR, PIGN, C14ORF147, COQ2, LCLAT1, CLN8, GPAM, SC5DL, DEGS1, CNBP, HSD17B12, ABHD5, HMGCS1, SERINC5, DHCR7, PEMT, GGPS1, ETNK1, PRKAA1, GLT25D1, FADS1, …	2397	323	13528	1.275516	1.000000e+00	3.150024e-01	3.102669e+01
no Peak	cellular macromolecular complex assembly	72	0.215484991	1.964843e-02	RSF1, XPO6, HP1BP3, COX10, AP2S1, RBM5, NAP1L1, SNRPD1, SNRPD2, SMNDC1, NDUFS4, H2AFV, GSN, GTF2A2, NDUFS8, HIST3H2A, DDX20, TUBG1, TGS1, COX18, TUBA1C, MYST3, CLNS1A, SRPK2, SF1, IPO9, MBNL1, H2AFJ, FLNA, IPO7, TBCA, NUP205, NCK1, IPO5, SNRPB, SMARCA5, SLU7, SNRPC, CAV1, NUP98, NUFIP1, TSPYL5, BMS1, TFAM, CSE1L, HJURP, CENPA, USP39, NPM1, FBXO5, HSPA4, PEX13, GEMIN6, TNPO1, HIST1H2BC, SRP54, DDX…	2397	318	13528	1.277824	1.000000e+00	3.146391e-01	3.110198e+01
no Peak	double-strand break repair via nonhomologous end joining	6	0.017957083	1.989886e-02	XRCC5, XRCC4, XRCC6, POLA1, PRKDC, XRCC6BP1	2397	10	13528	3.386233	1.000000e+00	3.168387e-01	3.143164e+01
no Peak	spindle localization	6	0.017957083	1.989886e-02	CCDC99, CENPA, NUSAP1, NDC80, MYH9, ZW10	2397	10	13528	3.386233	1.000000e+00	3.168387e-01	3.143164e+01
no Peak	establishment of spindle localization	6	0.017957083	1.989886e-02	CCDC99, CENPA, NUSAP1, NDC80, MYH9, ZW10	2397	10	13528	3.386233	1.000000e+00	3.168387e-01	3.143164e+01
no Peak	G1/S transition checkpoint	8	0.023942777	2.019027e-02	TRIAP1, NBN, HUS1, PML, DGKZ, RPS27L, RBM38, DLG1	2397	17	13528	2.655869	1.000000e+00	3.195508e-01	3.181337e+01
no Peak	cellular protein complex disassembly	8	0.023942777	2.019027e-02	KIF2C, MTERF, PTRF, ICT1, KIF18A, STMN1, MTERFD3, TTF2	2397	17	13528	2.655869	1.000000e+00	3.195508e-01	3.181337e+01
no Peak	protein complex disassembly	8	0.023942777	2.019027e-02	KIF2C, MTERF, PTRF, ICT1, KIF18A, STMN1, MTERFD3, TTF2	2397	17	13528	2.655869	1.000000e+00	3.195508e-01	3.181337e+01
no Peak	protein import into nucleus, docking	8	0.023942777	2.019027e-02	NUP98, XPO6, CSE1L, IPO7, NUP205, IPO5, IPO9, TNPO1	2397	17	13528	2.655869	1.000000e+00	3.195508e-01	3.181337e+01
no Peak	regulation of pathway-restricted SMAD protein phosphorylation	8	0.023942777	2.019027e-02	BMP4, SMAD7, SMAD6, TGFBR1, SMAD4, TGFB3, BMP7, BMPR1A	2397	17	13528	2.655869	1.000000e+00	3.195508e-01	3.181337e+01
no Peak	negative regulation of programmed cell death	80	0.239427768	2.032143e-02	XRCC5, XRCC4, MAEA, XRCC2, STAT5B, TGFB3, FOXO1, NFKB1, SGMS1, CIAPIN1, PTEN, MAP3K7, TRIAP1, BAG4, APOE, HMOX1, MYC, IRAK1, ZC3HC1, SGK3, BRAF, ROCK1, DFFA, PIM1, PRKCI, HRK, CSDA, HBXIP, NME6, MSX1, PSEN1, BNIP1, HIPK3, TNFAIP8, VEGFA, FOXC1, UBB, CLN8, UBA52, ACVR1, TMX1, GCLC, XIAP, NFKBIA, ASNS, BCL2L1, MSX2, IGF1R, SQSTM1, BCL2, NPM1, DAD1, BCL3, BCL6, FAIM, TAF9, GLO1, AATF, APC, HSPA9, ST…	2397	359	13528	1.257654	1.000000e+00	3.201430e-01	3.198453e+01
no Peak	regulation of specific transcription from RNA polymerase II promoter	26	0.077814024	2.033460e-02	XRCC6, PRKDC, NFKBIA, NFKB1, CTNNB1, GATA2, HEY1, GATA6, MAP3K1, GTF2A2, TAF9, BCOR, TCF3, NR1H3, TAF2, CEBPA, TBL1XR1, SMAD7, SMAD3, HDAC4, DLX2, DLX1, NOTCH1, TBL1X, NCOR2, SMARCA4	2397	94	13528	1.561029	1.000000e+00	3.191971e-01	3.200169e+01
no Peak	DNA-dependent DNA replication	18	0.053871248	2.041036e-02	BLM, TIPIN, POLA1, WRN, MCM3, MCM4, MCM5, MCM6, PURA, RPA1, POLD3, PRIM1, TFAM, RPA2, RFC3, PRIM2, TOP3A, POLG2	2397	58	13528	1.751500	1.000000e+00	3.190690e-01	3.210033e+01
no Peak	maintenance of protein location in cell	14	0.041899859	2.113264e-02	BBS4, TLN1, CAV1, NFKBIB, SPTBN4, PML, G3BP2, NFKBIA, NDC80, TOPORS, MXI1, FLNB, FLNA, BCL3	2397	41	13528	1.927124	1.000000e+00	3.272359e-01	3.303409e+01
no Peak	negative regulation of cell death	80	0.239427768	2.163879e-02	XRCC5, XRCC4, MAEA, XRCC2, STAT5B, TGFB3, FOXO1, NFKB1, SGMS1, CIAPIN1, PTEN, MAP3K7, TRIAP1, BAG4, APOE, HMOX1, MYC, IRAK1, ZC3HC1, SGK3, BRAF, ROCK1, DFFA, PIM1, PRKCI, HRK, CSDA, HBXIP, NME6, MSX1, PSEN1, BNIP1, HIPK3, TNFAIP8, VEGFA, FOXC1, UBB, CLN8, UBA52, ACVR1, TMX1, GCLC, XIAP, NFKBIA, ASNS, BCL2L1, MSX2, IGF1R, SQSTM1, BCL2, NPM1, DAD1, BCL3, BCL6, FAIM, TAF9, GLO1, AATF, APC, HSPA9, ST…	2397	360	13528	1.254160	1.000000e+00	3.325246e-01	3.368118e+01
no Peak	tRNA transcription	5	0.014964235	2.182170e-02	BRF1, GTF3C6, GTF3C2, GTF3C4, GTF3C3	2397	7	13528	4.031230	1.000000e+00	3.336911e-01	3.391355e+01
no Peak	insulin receptor signaling pathway	13	0.038907012	2.194236e-02	GRB2, PTPN2, FOXO1, AP3S1, IRS1, SLC2A8, IGF1R, GRB10, GAB1, SH2B2, PIK3R3, INSR, PIK3R1	2397	37	13528	1.982929	1.000000e+00	3.340701e-01	3.406643e+01
no Peak	regulation of translation	35	0.104749648	2.212513e-02	EIF2C2, CPEB2, IMPACT, PML, GCN1L1, APP, EIF3H, TIA1, HRSP12, SEPSECS, BCL3, PUM2, TNRC6B, TNRC6A, EIF2B3, SAMD4A, EIF2B5, PRKCA, DDX1, IREB2, EIF1B, CASC3, RPS4X, EIF2B1, SELT, MAPK1, EIF4G2, EIF4E, NCK1, PPP1R15B, EEFSEC, EIF5A2, PPP1R15A, EIF2C3, EIF4E2	2397	137	13528	1.441827	1.000000e+00	3.352168e-01	3.429736e+01
no Peak	regulation of cell development	49	0.146649508	2.225797e-02	XRCC5, XRCC4, NBN, NRP1, XRCC2, XRCC6, TGFB3, NRCAM, APOE, ASPM, ARHGEF1, PTPRF, DLL1, SLIT2, NUMBL, AMIGO1, MIB1, PSEN1, UBB, UBA52, KALRN, TIMP2, TTC3, BCL2, DNMT3B, BMP4, B4GALT1, TBX3, SMAD7, SMAD4, RTN4R, SMAD3, SMAD2, SMAD1, NTRK3, NOTCH3, DLX2, ATF5, HDAC4, NOTCH1, YWHAG, RNF6, DLX1, YWHAH, ULK1, PBX1, ID4, BMP7, BMPR1A	2397	205	13528	1.348987	1.000000e+00	3.357363e-01	3.446472e+01
no Peak	DNA damage response, signal transduction resulting in induction of apoptosis	12	0.035914165	2.256416e-02	MSH6, ERCC6, UACA, AIFM1, HMOX1, PML, BCL3, RPS27L, MBD4, DYRK2, ABL1, BRCA1	2397	33	13528	2.052262	1.000000e+00	3.383783e-01	3.484894e+01
no Peak	small GTPase mediated signal transduction	69	0.206506450	2.268738e-02	GNA13, GNA12, SHOC2, RHOV, IQGAP1, CDC42, DAB1, RAB28, APOE, HMOX1, RAPGEF6, RRAS, RALA, RAPGEF3, RAB6A, RAB27B, RAB20, SAR1A, RAB21, RAP2B, RAP2A, ARL1, RSU1, ARHGEF1, RABL3, RAP2C, BRAF, ROCK1, RALBP1, RREB1, ARHGEF7, G3BP2, ARL3, MAPK1, RND3, RAB18, GNB1, KRIT1, RRAS2, RAB12, ARL8B, RAB10, ARL4D, ARL4A, RAB7A, RALGPS2, GRB2, MAPKAPK3, RTKN, ARF6, RAB40B, SOS1, RAB11A, PDK1, RAB2A, RAB2B, ABR, …	2397	305	13528	1.276776	1.000000e+00	3.387616e-01	3.500295e+01
no Peak	embryonic digit morphogenesis	10	0.029928471	2.277325e-02	HOXC11, TULP3, GNAQ, TBX3, GNA12, IFT52, IFT88, FLVCR1, CTNNB1, LRP5	2397	25	13528	2.257489	1.000000e+00	3.386882e-01	3.511008e+01
no Peak	purine ribonucleoside metabolic process	11	0.032921318	2.289232e-02	PANK3, OCLN, HMGCR, PANK1, QTRTD1, PEMT, DGUOK, HPRT1, PPCDC, TPMT, DNMT3B	2397	29	13528	2.140722	1.000000e+00	3.390171e-01	3.525835e+01
no Peak	purine nucleoside metabolic process	11	0.032921318	2.289232e-02	PANK3, OCLN, HMGCR, PANK1, QTRTD1, PEMT, DGUOK, HPRT1, PPCDC, TPMT, DNMT3B	2397	29	13528	2.140722	1.000000e+00	3.390171e-01	3.525835e+01
no Peak	regulation of peptidase activity	24	0.071828330	2.377407e-02	DLC1, CAV1, HERPUD1, SMAD6, CYCS, MGMT, CST3, PML, SMAD3, CDH1, PMAIP1, STAT1, HBXIP, SLC11A2, TNFRSF10A, UACA, VCP, GSPT1, MTCH1, CSTB, HSPE1, HSPD1, MYC, TERF1	2397	86	13528	1.574992	1.000000e+00	3.484664e-01	3.634641e+01
no Peak	cellular response to hormone stimulus	34	0.101756801	2.397238e-02	GRB2, PGF, STAT5B, PRKDC, AP3S1, FOXO1, GNG12, LATS2, SLC2A8, IGF1R, PRKAR2B, GAB1, KDM3A, SH2B2, PIK3R3, INSR, PIK3R1, GNG7, PTPN2, PRKCI, FBP1, STAT1, IRS1, UBE2B, LPIN1, PTPN11, GRB10, ADCY9, GNB1, PRKAR1B, JAK2, GNB4, IGFBP2, PARP1	2397	133	13528	1.442756	1.000000e+00	3.496871e-01	3.658873e+01
no Peak	cellular response to insulin stimulus	20	0.059856942	2.439228e-02	PTPN2, GRB2, PRKCI, FBP1, PRKDC, FOXO1, AP3S1, STAT1, IRS1, LPIN1, UBE2B, SLC2A8, IGF1R, GRB10, GAB1, SH2B2, PARP1, PIK3R3, INSR, PIK3R1	2397	68	13528	1.659918	1.000000e+00	3.534947e-01	3.709893e+01
no Peak	tRNA aminoacylation	15	0.044892706	2.444612e-02	CARS, AIMP1, FARS2, GARS, WARS2, AARSD1, LARS2, KARS, DTD1, WARS, TARS, PARS2, NARS2, RARS, POLG2	2397	46	13528	1.840344	1.000000e+00	3.529942e-01	3.716406e+01
no Peak	tRNA aminoacylation for protein translation	15	0.044892706	2.444612e-02	CARS, AIMP1, FARS2, GARS, WARS2, AARSD1, LARS2, KARS, DTD1, WARS, TARS, PARS2, NARS2, RARS, POLG2	2397	46	13528	1.840344	1.000000e+00	3.529942e-01	3.716406e+01
no Peak	amino acid activation	15	0.044892706	2.444612e-02	CARS, AIMP1, FARS2, GARS, WARS2, AARSD1, LARS2, KARS, DTD1, WARS, TARS, PARS2, NARS2, RARS, POLG2	2397	46	13528	1.840344	1.000000e+00	3.529942e-01	3.716406e+01
no Peak	hemopoiesis	55	0.164606590	2.469187e-02	XRCC5, BMI1, XRCC4, MAEA, STAT5B, TIRAP, ZNF675, JAG1, CIAPIN1, CTNNB1, CDC42, MLL5, MYST3, FLVCR1, SYK, DLL1, OSTM1, MYH9, CD164, PSEN1, VEGFA, SLC25A38, MED1, BLM, TIPARP, PML, KITLG, PRKDC, SFXN1, SOX6, ITGB1, RPA1, BCL2, PPP3CB, BCL3, TCEA1, BCL6, RUNX1, TCF3, PIK3R1, APC, CEBPA, BMP4, KLF6, MSH2, MYO1E, ZNF160, MALT1, ATP7A, NOTCH2, HDAC4, PKNOX1, JAK2, PBX1, SCAND1	2397	236	13528	1.315274	1.000000e+00	3.547257e-01	3.746056e+01
no Peak	cell part morphogenesis	59	0.176577979	2.475963e-02	S100A6, NRP1, COX10, PIP5K1C, RAB3IP, NRCAM, APP, COL4A3BP, MKKS, SPON2, DSCAM, PRKCA, OPA1, SSBP1, EFNB1, PCM1, SLIT1, SLIT2, SLIT3, NUMBL, AMIGO1, BBS2, EFNA5, SIAH1, UBB, IFT88, DST, UBA52, KALRN, BBS4, RTN4RL1, ONECUT2, TTC8, HPRT1, ALCAM, IGF1R, PVRL1, BCL2, B3GNT2, APC, KLF7, PCNT, SPTBN4, RTN4R, NR4A2, CELSR3, ALMS1, WWTR1, PTPN11, ATP7A, EPHA4, NOTCH1, SEMA6C, ULK1, ULK2, JAK2, CACNA1F, B…	2397	256	13528	1.300701	1.000000e+00	3.543864e-01	3.754209e+01
no Peak	pseudouridine synthesis	7	0.020949930	2.526475e-02	PUS7L, RPUSD4, PUS1, TRUB1, TRUB2, NOP10, PUS7	2397	14	13528	2.821861	1.000000e+00	3.590671e-01	3.814662e+01
no Peak	nucleobase biosynthetic process	7	0.020949930	2.526475e-02	UMPS, DHODH, CAD, HPRT1, PAICS, PPAT, GART	2397	14	13528	2.821861	1.000000e+00	3.590671e-01	3.814662e+01
no Peak	nucleotide-excision repair	17	0.050878401	2.575644e-02	RAD23B, DDB1, LIG1, GTF2H3, GTF2H5, GTF2H1, RPA3, RPA1, POLD3, RPA2, RFC3, DCLRE1A, ERCC6, PCNA, ERCC3, ERCC4, FANCC	2397	55	13528	1.744423	1.000000e+00	3.635285e-01	3.872975e+01
no Peak	glycoprotein metabolic process	48	0.143656661	2.609525e-02	GALNT3, OSTC, LDLR, NDST1, FUT8, GALNT6, FUT5, IDE, EDEM3, ALG8, HS2ST1, STT3B, NGLY1, ST3GAL1, POMT2, ST3GAL2, B3GALNT1, DAD1, HS6ST1, RPN2, B3GNT2, FUT2, MAN2B1, FKRP, GCNT1, SDF2, PHLDA1, B4GALT1, AGA, MAN1A2, COG3, MGAT1, ATP7A, NCSTN, HIF1A, LARGE, PSEN1, ST8SIA4, CSGALNACT2, CHST8, DPM1, DPM2, EXT1, POFUT1, EXT2, ALG12, HS3ST3B1, COG2	2397	202	13528	1.341082	1.000000e+00	3.662133e-01	3.912854e+01
no Peak	phosphoinositide metabolic process	21	0.062849789	2.616812e-02	IMPA1, PIGY, PIK3C2A, PIGW, PIK3C2B, PI4KA, SMG1, PIP5K1C, PIP5K1A, PTEN, ALG9, PLAUR, PIGN, PIGK, PIGL, PIGH, DPM1, DPM2, PIP4K2A, ALG12, PIK3R1	2397	73	13528	1.623536	1.000000e+00	3.658989e-01	3.921399e+01
no Peak	respiratory electron transport chain	19	0.056864095	2.624384e-02	NDUFA5, NDUFB5, ALDH5A1, NDUFA9, COX10, NDUFA7, NDUFAB1, NDUFC1, NDUFAF1, SDHAF2, NDUFB1, NDUFB2, NDUFV3, SLC25A13, NDUFS4, UQCRH, NDUFS8, NDUFS1, UQCRB	2397	64	13528	1.675480	1.000000e+00	3.656186e-01	3.930266e+01
no Peak	regulation of gene-specific transcription	34	0.101756801	2.655950e-02	XRCC6, TGFB3, NFKBIA, PRKDC, NFKB1, CTNNB1, GATA2, HEY1, GATA6, MAP3K1, GTF2A2, PEX14, TAF9, NR2F2, BCOR, INSR, TCF3, NR1H3, CEBPA, TAF2, TBL1XR1, SMAD7, SMAD3, SMAD2, HDAC4, DLX2, DLX1, NOTCH1, HIF1A, BPTF, TBL1X, MAPRE3, NCOR2, SMARCA4	2397	134	13528	1.431989	1.000000e+00	3.680012e-01	3.967098e+01
no Peak	embryonic limb morphogenesis	24	0.071828330	2.706432e-02	TBX3, CRABP2, GNA12, SKI, MBNL1, CTNNB1, MSX2, NOTCH2, NOTCH1, DKK1, HOXC11, MSX1, SALL4, TULP3, GNAQ, PSEN1, PBX1, PTCH1, IFT52, IFT88, FLVCR1, SMARCA4, LRP5, MED1	2397	87	13528	1.556889	1.000000e+00	3.724328e-01	4.025564e+01
no Peak	negative regulation of protein kinase activity	24	0.071828330	2.706432e-02	PRKCA, PPP2R1A, CAV1, SNX6, HMGCR, PRKAG2, ZNF675, DUSP22, PKIB, PKIA, LATS2, YWHAG, PSEN1, HEXIM2, PAK2, RGS3, HEXIM1, APOE, HIPK3, PPP2CA, GADD45G, SPRED2, GADD45A, APC	2397	87	13528	1.556889	1.000000e+00	3.724328e-01	4.025564e+01
no Peak	embryonic appendage morphogenesis	24	0.071828330	2.706432e-02	TBX3, CRABP2, GNA12, SKI, MBNL1, CTNNB1, MSX2, NOTCH2, NOTCH1, DKK1, HOXC11, MSX1, SALL4, TULP3, GNAQ, PSEN1, PBX1, PTCH1, IFT52, IFT88, FLVCR1, SMARCA4, LRP5, MED1	2397	87	13528	1.556889	1.000000e+00	3.724328e-01	4.025564e+01
no Peak	somatic recombination of immunoglobulin gene segments	8	0.023942777	2.809790e-02	EXO1, XRCC4, MSH6, NBN, MSH3, MSH2, PRKDC, HSPD1	2397	18	13528	2.508321	1.000000e+00	3.825097e-01	4.143598e+01
no Peak	protein import into nucleus, translocation	12	0.035914165	2.816417e-02	RBM22, MAPK1, SEC61B, PML, TGFB3, NFKBIA, BCL3, SPTBN1, BCL6, JAK2, POLA2, TNPO1	2397	34	13528	1.991902	1.000000e+00	3.820784e-01	4.151090e+01
no Peak	rRNA processing	25	0.074821177	2.831151e-02	NAF1, RNASEL, UTP18, UTP15, ERI1, PIN4, EXOSC10, UTP11L, WDR36, RRP1B, FRG1, RPS24, UTP23, EXOSC6, EXOSC2, MPHOSPH10, RPS6, NOP10, FBL, RPS7, NOLC1, NOP58, PES1, DDX51, C1D	2397	92	13528	1.533620	1.000000e+00	3.825156e-01	4.167715e+01
no Peak	nucleotide-excision repair, DNA damage removal	9	0.026935624	2.931168e-02	RPA1, RAD23B, RPA2, DDB1, GTF2H3, ERCC3, ERCC4, RPA3, GTF2H1	2397	22	13528	2.308795	1.000000e+00	3.919450e-01	4.279392e+01
no Peak	lung alveolus development	9	0.026935624	2.931168e-02	ATP7A, BMP4, TNS3, MAN1A2, VEGFA, TGFB3, BMPR2, HS6ST1, FOXP2	2397	22	13528	2.308795	1.000000e+00	3.919450e-01	4.279392e+01
no Peak	somatic diversification of immunoglobulins	9	0.026935624	2.931168e-02	EXO1, XRCC4, MSH6, NBN, MSH3, MSH2, PRKDC, HSPD1, CTNNBL1	2397	22	13528	2.308795	1.000000e+00	3.919450e-01	4.279392e+01
no Peak	cellular polysaccharide biosynthetic process	10	0.029928471	2.949848e-02	GLT25D1, GBE1, PHKG2, CSGALNACT2, B3GNT2, CERCAM, EXT1, EXT2, AGL, HS2ST1	2397	26	13528	2.170662	1.000000e+00	3.927482e-01	4.300025e+01
no Peak	ATP synthesis coupled electron transport	17	0.050878401	3.031067e-02	NDUFA5, NDUFB5, NDUFA9, COX10, NDUFA7, NDUFAB1, NDUFC1, NDUFAF1, SDHAF2, NDUFB1, NDUFB2, NDUFV3, NDUFS4, UQCRH, NDUFS8, NDUFS1, UQCRB	2397	56	13528	1.713273	1.000000e+00	3.999991e-01	4.388914e+01
no Peak	mitochondrial ATP synthesis coupled electron transport	17	0.050878401	3.031067e-02	NDUFA5, NDUFB5, NDUFA9, COX10, NDUFA7, NDUFAB1, NDUFC1, NDUFAF1, SDHAF2, NDUFB1, NDUFB2, NDUFV3, NDUFS4, UQCRH, NDUFS8, NDUFS1, UQCRB	2397	56	13528	1.713273	1.000000e+00	3.999991e-01	4.388914e+01
no Peak	telencephalon development	19	0.056864095	3.047100e-02	BMP4, BBS4, HTT, HPRT1, YWHAE, FOXP2, TACC2, BBS2, DLX2, DLX1, SLC1A2, DAB1, PSEN1, MKKS, ID4, PEX13, LRP8, IFT88, MYH10	2397	65	13528	1.649703	1.000000e+00	4.004871e-01	4.406307e+01
no Peak	phospholipid biosynthetic process	27	0.080806872	3.050693e-02	IMPA1, ABHD5, SGMS1, ALG9, PIGK, PIGL, SERINC5, AGPAT6, PIGH, PEMT, ETNK1, PTDSS1, AGPAT3, PIGY, PIK3C2A, FADS1, PIGW, PI4KA, CDS1, PIGN, PLAUR, DPM1, DPM2, LCLAT1, MBOAT2, ALG12, GPAM	2397	102	13528	1.493926	1.000000e+00	3.997038e-01	4.410197e+01
no Peak	lipopolysaccharide-mediated signaling pathway	6	0.017957083	3.124610e-02	IRAK1, MAPK1, MAPK14, TICAM1, NFKBIA, STAT1	2397	11	13528	3.078393	1.000000e+00	4.060406e-01	4.489666e+01
no Peak	subpallium development	6	0.017957083	3.124610e-02	BBS4, BBS2, HTT, MKKS, HPRT1, FOXP2	2397	11	13528	3.078393	1.000000e+00	4.060406e-01	4.489666e+01
no Peak	heparan sulfate proteoglycan biosynthetic process	6	0.017957083	3.124610e-02	NDST1, HS6ST1, EXT1, EXT2, HS3ST3B1, HS2ST1	2397	11	13528	3.078393	1.000000e+00	4.060406e-01	4.489666e+01
no Peak	mRNA polyadenylation	6	0.017957083	3.124610e-02	APP, PAPOLA, GRSF1, CPSF3, CSTF1, CPSF1	2397	11	13528	3.078393	1.000000e+00	4.060406e-01	4.489666e+01
no Peak	regulation of cell morphogenesis	33	0.098763954	3.182757e-02	DLC1, GNA13, NRP1, SHROOM3, FERMT2, GNA12, TGFB3, TTC3, NRCAM, ANXA7, APOE, FGD3, ARHGEF1, PTPRF, SMAD7, SMAD4, RTN4R, SMAD3, SMAD2, SMAD1, MYH9, SLIT2, NUMBL, AMIGO1, NTRK3, RNF6, YWHAH, PSEN1, ULK1, VEGFA, CFDP1, ARAP1, MYH10	2397	131	13528	1.421701	1.000000e+00	4.107024e-01	4.551429e+01
no Peak	tissue morphogenesis	43	0.128692425	3.250864e-02	DLC1, BBS4, SHROOM3, PGF, BMPR2, JAG1, TPM1, CTNNB1, MAP3K7, WNT3, BCL2, MKKS, BMP4, TBX3, HTT, SMAD7, GRSF1, SMAD4, SMAD3, FZD3, SMAD2, SMAD1, CELSR1, SNAI1, SLIT2, ATP7A, NOTCH2, MIB1, NOTCH1, TIMELESS, PTCD2, PBX1, FOXC1, PTCH1, COL1A1, IFT52, BMP7, MESP1, EXT2, KLF4, ACVR1, BMPR1A, SMARCA4	2397	180	13528	1.348222	1.000000e+00	4.162765e-01	4.622936e+01
no Peak	Notch signaling pathway	16	0.047885554	3.252306e-02	MAML1, DLL1, JAG1, NOTCH3, NCSTN, NOTCH2, MIB1, NOTCH1, APP, PSEN1, HEY1, DLL4, FOXC1, MESP1, POFUT1, SEL1L	2397	52	13528	1.736530	1.000000e+00	4.152573e-01	4.624441e+01
no Peak	limb development	27	0.080806872	3.415136e-02	CRABP2, GNA12, CTNNB1, MSX2, NR2F2, PITX1, FLVCR1, TBX3, SKI, MBNL1, NOTCH2, NOTCH1, HOXC11, DKK1, TULP3, MSX1, SALL4, PSEN1, GNAQ, PBX1, PTCH1, IFT52, IFT88, SMARCA4, BMPR1A, LRP5, MED1	2397	103	13528	1.479422	1.000000e+00	4.298449e-01	4.791774e+01
no Peak	appendage development	27	0.080806872	3.415136e-02	CRABP2, GNA12, CTNNB1, MSX2, NR2F2, PITX1, FLVCR1, TBX3, SKI, MBNL1, NOTCH2, NOTCH1, HOXC11, DKK1, TULP3, MSX1, SALL4, PSEN1, GNAQ, PBX1, PTCH1, IFT52, IFT88, SMARCA4, BMPR1A, LRP5, MED1	2397	103	13528	1.479422	1.000000e+00	4.298449e-01	4.791774e+01
no Peak	cell-cell junction organization	12	0.035914165	3.469533e-02	CD9, CDC42, TLN1, TJP1, GJD3, SMAD7, TGFB3, PRKCI, STRN, SMAD3, NUMBL, APC	2397	35	13528	1.934990	1.000000e+00	4.338321e-01	4.846568e+01
no Peak	positive regulation of specific transcription from RNA polymerase II promoter	17	0.050878401	3.543215e-02	TAF2, CEBPA, XRCC6, NFKBIA, SMAD3, PRKDC, CTNNB1, HDAC4, GATA2, NOTCH1, GATA6, MAP3K1, GTF2A2, TAF9, TCF3, NR1H3, SMARCA4	2397	57	13528	1.683215	1.000000e+00	4.395667e-01	4.919917e+01
no Peak	embryonic morphogenesis	68	0.203513602	3.584964e-02	DLC1, NDST1, GNA12, CRABP2, HIRA, TGFB3, CTNNB1, MAP3K7, CUL3, WNT3, OSR2, MKKS, MYC, FRS2, FLVCR1, ODZ4, GSC, LDB1, SIX4, MBNL1, SLIT2, MIB1, MSX1, HOXC11, GNAQ, PSEN1, FOXC1, EXT1, IFT88, EXT2, MED1, SMARCA4, ACVR1, BBS4, SHROOM3, BMPR2, UGDH, MSX2, LHX1, POU2F1, PPAP2B, BMP4, TBX3, HTT, TGFBR1, GRSF1, SMAD4, SMAD3, FZD3, SMAD2, SKI, CELSR1, SMAD1, DLX2, NOTCH2, NOTCH1, SALL4, DKK1, TULP3, GFPT…	2397	307	13528	1.250075	1.000000e+00	4.422603e-01	4.961038e+01
no Peak	response to X-ray	7	0.020949930	3.593774e-02	XRCC4, ERCC6, XRCC2, BRCC3, THBD, BLM, MSH2	2397	15	13528	2.633737	1.000000e+00	4.418924e-01	4.969675e+01
no Peak	nucleobase, nucleoside, nucleotide and nucleic acid transport	29	0.086792566	3.596406e-02	ENY2, NXT1, NUP98, AGFG1, NUP160, NXT2, SLC29A1, NUP210, NPM1, NUP37, NUP35, XPOT, NUP133, NUP153, MYO1C, CKAP5, G3BP2, SMG1, CASC3, NXF1, NUPL2, NUPL1, VDAC3, PHAX, NUP205, THOC5, THOC2, EIF5A2, LRPPRC	2397	113	13528	1.448389	1.000000e+00	4.409585e-01	4.972252e+01
no Peak	protein amino acid phosphorylation	137	0.410020052	3.692553e-02	RNASEL, STK38, TBK1, TGFB3, DSTYK, MAP3K7, APP, CSNK2A1, CLK3, COL4A3BP, AAK1, CLK4, GAB1, STK39, FRS2, INSR, MAP2K5, SYK, TWF1, PAN3, TNIK, BCR, ROCK1, BRAF, ROCK2, PNCK, WNK1, PIM1, MARK3, STK3, SPAG9, MAPK1, MAPK6, RIOK3, MAPK9, RIPK4, MST1R, NEK4, NRBP2, KALRN, NEK7, NEK2, NEK1, STK10, MAPKAPK5, HUS1, STK17B, MAPKAPK3, BMPR2, ADRBK2, RIOK2, EPHB4, VRK1, PTK6, DYRK2, SMAD7, MAP2K2, TGFBR1, TAO…	2397	667	13528	1.159205	1.000000e+00	4.485618e-01	5.065559e+01
no Peak	limb morphogenesis	26	0.077814024	3.708028e-02	CRABP2, GNA12, CTNNB1, MSX2, PITX1, FLVCR1, TBX3, SKI, MBNL1, NOTCH2, NOTCH1, HOXC11, DKK1, TULP3, MSX1, SALL4, PSEN1, GNAQ, PTCH1, PBX1, IFT52, IFT88, SMARCA4, BMPR1A, LRP5, MED1	2397	99	13528	1.482189	1.000000e+00	4.487823e-01	5.080424e+01
no Peak	appendage morphogenesis	26	0.077814024	3.708028e-02	CRABP2, GNA12, CTNNB1, MSX2, PITX1, FLVCR1, TBX3, SKI, MBNL1, NOTCH2, NOTCH1, HOXC11, DKK1, TULP3, MSX1, SALL4, PSEN1, GNAQ, PTCH1, PBX1, IFT52, IFT88, SMARCA4, BMPR1A, LRP5, MED1	2397	99	13528	1.482189	1.000000e+00	4.487823e-01	5.080424e+01
no Peak	establishment of mitotic spindle localization	5	0.014964235	3.759840e-02	CCDC99, CENPA, NUSAP1, NDC80, ZW10	2397	8	13528	3.527326	1.000000e+00	4.522586e-01	5.129882e+01
no Peak	intracellular signaling cascade	247	0.739233233	3.779865e-02	THOP1, EDN2, SNIP1, STAT5B, CTNNB1, MAP3K7, APOE, RAB28, GAB1, RAPGEF6, DEPDC1B, RAPGEF3, RAB27B, RAB20, RAB21, SYK, GNG7, MAP2K5, BCR, TNIK, ROCK1, BRAF, RREB1, ROCK2, WNK1, MED13, TANK, RAD1, RND3, MAPK1, SPAG9, RAB18, MED16, MED17, MAPK9, PIAS2, RAB12, ARL8B, RAB10, GRB14, RALGPS2, NFKBIB, HUS1, DUSP10, STK17B, NFKBIA, ARF6, ASB13, ARFGEF2, MYO9A, RAB40B, GPR155, ABR, SMAD7, MAP2K2, RASEF, TGF…	2397	1256	13528	1.109872	1.000000e+00	4.528688e-01	5.148871e+01
no Peak	centrosome cycle	8	0.023942777	3.786186e-02	KIF11, CEP250, NEK2, NPM1, CETN3, GADD45A, BRCA1, CTNNB1	2397	19	13528	2.376304	1.000000e+00	4.522590e-01	5.154850e+01
no Peak	glutamine metabolic process	8	0.023942777	3.786186e-02	GLUL, ALDH5A1, GFPT1, CAD, ASNS, ASL, PPAT, PFAS	2397	19	13528	2.376304	1.000000e+00	4.522590e-01	5.154850e+01
no Peak	transcription from RNA polymerase III promoter	8	0.023942777	3.786186e-02	BRF1, POLR3K, GTF3C6, CRCP, GTF3C2, GTF3C4, GTF3C3, POLR3D	2397	19	13528	2.376304	1.000000e+00	4.522590e-01	5.154850e+01
no Peak	nucleobase metabolic process	9	0.026935624	3.816088e-02	MAPK1, UMPS, DHODH, CAD, HPRT1, AMPD2, PAICS, PPAT, GART	2397	23	13528	2.208413	1.000000e+00	4.537379e-01	5.183042e+01
no Peak	cellular pigmentation	9	0.026935624	3.816088e-02	BBS4, BBS2, SHROOM3, BLOC1S3, MLPH, BCL2, MKKS, CNO, VPS33B	2397	23	13528	2.208413	1.000000e+00	4.537379e-01	5.183042e+01
no Peak	regulation of nervous system development	45	0.134678119	3.848655e-02	XRCC5, XRCC4, NBN, XRCC2, NRP1, XRCC6, TIMP2, TTC3, NRCAM, PVRL1, APOE, LHX1, BCL2, DNMT3B, ASPM, PRKCA, BMP4, ARHGEF1, PTPRF, RTN4R, DLL1, SMAD1, SLIT2, NUMBL, NTRK3, NOTCH3, AMIGO1, DLX2, MIB1, ATF5, RNF6, DLX1, YWHAG, NOTCH1, TULP3, YWHAH, PSEN1, ULK1, PBX1, ID4, UBB, BMP7, UBA52, KALRN, BMPR1A	2397	192	13528	1.322747	1.000000e+00	4.554369e-01	5.213569e+01
no Peak	negative regulation of kinase activity	24	0.071828330	3.902707e-02	PRKCA, PPP2R1A, CAV1, SNX6, HMGCR, PRKAG2, ZNF675, DUSP22, PKIB, PKIA, LATS2, YWHAG, PSEN1, HEXIM2, PAK2, RGS3, HEXIM1, APOE, HIPK3, PPP2CA, GADD45G, SPRED2, GADD45A, APC	2397	90	13528	1.504992	1.000000e+00	4.589894e-01	5.263832e+01
no Peak	steroid hormone receptor signaling pathway	17	0.050878401	4.115475e-02	FHL2, NR3C1, MED13, BRCA1, CTNNB1, YWHAH, NCOA2, NCOA3, RNF4, MED16, MED17, PIAS2, KDM3A, JAK2, PMEPA1, RNF14, MED1	2397	58	13528	1.654194	1.000000e+00	4.759947e-01	5.456870e+01
no Peak	endosome transport	17	0.050878401	4.115475e-02	HTT, SNX1, TINAGL1, VTI1A, FLNA, ANKRD27, HOOK1, AKTIP, SQSTM1, STX16, VPS4B, BET1L, VPS35, GOSR1, EHD1, VPS26A, RHOBTB3	2397	58	13528	1.654194	1.000000e+00	4.759947e-01	5.456870e+01
no Peak	positive regulation of glycoprotein biosynthetic process	4	0.011971388	4.181437e-02	SOAT1, PAWR, INSR, CTNNB1	2397	5	13528	4.514977	1.000000e+00	4.803227e-01	5.515187e+01
no Peak	positive regulation of helicase activity	4	0.011971388	4.181437e-02	MSH6, MSH3, SSBP1, MSH2	2397	5	13528	4.514977	1.000000e+00	4.803227e-01	5.515187e+01
no Peak	positive regulation of Cdc42 GTPase activity	4	0.011971388	4.181437e-02	RALBP1, SH3D20, ARHGAP27, ARAP1	2397	5	13528	4.514977	1.000000e+00	4.803227e-01	5.515187e+01
no Peak	compartment specification	4	0.011971388	4.181437e-02	NOTCH1, DLL1, PBX3, LFNG	2397	5	13528	4.514977	1.000000e+00	4.803227e-01	5.515187e+01
no Peak	regulation of amyloid precursor protein biosynthetic process	4	0.011971388	4.181437e-02	SOAT1, BACE2, AATF, PAWR	2397	5	13528	4.514977	1.000000e+00	4.803227e-01	5.515187e+01
no Peak	DNA recombination	27	0.080806872	4.241025e-02	XRCC5, XRCC4, RAD51C, NBN, XRCC2, BLM, XRCC6, HUS1, PRKDC, MLH3, RPA1, IGHMBP2, NSMCE2, ERCC4, EXO1, MSH6, MSH3, MSH2, LIG1, MND1, WRN, TSN, BRCA1, RAD50, ATRX, RAD54B, HSPD1	2397	105	13528	1.451243	1.000000e+00	4.840649e-01	5.567259e+01
no Peak	cell fate commitment	34	0.101756801	4.287929e-02	ONECUT2, PRKDC, SOX6, JAG1, ITGB1, CTNNB1, CDC42, GATA2, WNT3, BCL2, TEAD4, POU2F1, NR2F2, IFRD1, FRS2, TCF3, RUNX2, PITX1, BMP4, TGFBR1, SMAD4, SMAD2, DLL1, SMAD1, NOTCH3, NOTCH2, DLX2, DLX1, NOTCH1, HOXC11, PSEN1, KLF4, TBX19, SMARCA4	2397	139	13528	1.380479	1.000000e+00	4.867233e-01	5.607844e+01
no Peak	negative regulation of neurogenesis	14	0.041899859	4.418584e-02	BMP4, ARHGEF1, NRP1, RTN4R, ATF5, DLX2, DLX1, RNF6, YWHAH, PSEN1, ULK1, ID4, BMP7, BMPR1A	2397	45	13528	1.755824	1.000000e+00	4.960895e-01	5.719048e+01
no Peak	regulation of cell morphogenesis involved in differentiation	21	0.062849789	4.441170e-02	ARHGEF1, NRP1, PTPRF, SMAD7, TGFB3, SMAD4, RTN4R, SMAD3, SMAD2, SMAD1, SLIT2, TTC3, NUMBL, AMIGO1, NTRK3, NRCAM, RNF6, YWHAH, PSEN1, ULK1, APOE	2397	77	13528	1.539197	1.000000e+00	4.967022e-01	5.738000e+01
no Peak	mitochondrial membrane organization	11	0.032921318	4.463938e-02	PPIF, LETM1, OPA1, HTT, BCL2, TIMM50, HSPA4, BCL2L1, COX18, CLN8, TIMM8A	2397	32	13528	1.940029	1.000000e+00	4.973248e-01	5.757023e+01
no Peak	embryonic pattern specification	11	0.032921318	4.463938e-02	TBX3, LHX1, EFNB1, SMAD6, FRAT1, SMAD2, DLL1, SMAD1, BMP7, FRS2, CTNNB1	2397	32	13528	1.940029	1.000000e+00	4.973248e-01	5.757023e+01
no Peak	protein oligomerization	41	0.122706731	4.466704e-02	SMARCAD1, CAV1, ATL2, BLM, GRB2, IDE, LNX2, CDH1, HPRT1, GCH1, CTNNB1, IGHMBP2, TRIM4, IGF1R, AQP11, MAP3K1, NPM1, PEX14, INSR, OLFM1, TERF1, IRAK1, BRAF, ALDH5A1, PCBD1, CCDC88C, MALT1, SKI, FADD, DECR1, ANXA5, IRS1, STOM, SPAG9, VCP, UQCRH, RRM1, AMFR, SEPT7, PARVA, SEPT9	2397	174	13528	1.329842	1.000000e+00	4.963623e-01	5.759329e+01
no Peak	rRNA metabolic process	25	0.074821177	4.499621e-02	NAF1, RNASEL, UTP18, UTP15, ERI1, PIN4, EXOSC10, UTP11L, WDR36, RRP1B, FRG1, RPS24, UTP23, EXOSC6, EXOSC2, MPHOSPH10, RPS6, NOP10, FBL, RPS7, NOLC1, NOP58, PES1, DDX51, C1D	2397	96	13528	1.469719	1.000000e+00	4.977817e-01	5.786677e+01
